# Supplementary material
Source: PubMed Central journal article supplement (PMC6013921)

## Supporting Information

### Nickel-Catalyzed Enantioselective Arylation of Pyridine

J. Patrick Lutz, Stephen T. Chau, and Abigail G. Doyle\*

Email: [agdoyle@princeton.edu](mailto:agdoyle@princeton.edu)

Department of Chemistry, Frick Chemical Laboratory, Princeton University

Princeton, New Jersey 08544, USA

|       |                                                                           |      |
|-------|---------------------------------------------------------------------------|------|
| I.    | General Information.....                                                  | S-2  |
| II.   | General Procedures.....                                                   | S-4  |
| III.  | Ligand Synthesis/Characterization .....                                   | S-6  |
| IV.   | Additional Optimization Details .....                                     | S-9  |
| V.    | Characterization of Compounds <b>1–6</b> .....                            | S-11 |
| VI.   | Derivatization Procedures/Characterization of Compounds <b>7–15</b> ..... | S-55 |
| VII.  | VT-NMR Studies of <b>5a</b> .....                                         | S-72 |
| VIII. | Crude NMR of <b>5a</b> .....                                              | S-74 |
| IX.   | NMR Spectra .....                                                         | S-76 |

## I. General Information

**General Procedures.** Unless otherwise noted, reactions were performed with rigorous exclusion of air and moisture. Plastic syringes were used to transfer air- and moisture-sensitive reagents. Solvent was freshly distilled/degassed prior to use unless otherwise noted. Reactions were monitored by thin-layer chromatography (TLC) on EMD Silica Gel 60 F<sub>254</sub> plates, visualizing with UV-light (254 nm) fluorescence quenching and KMnO<sub>4</sub> stain. Organic solutions were concentrated under reduced pressure using a rotary evaporator (25 °C, <50 torr). Automated column chromatography was performed using silica gel cartridges on a Biotage SP4 (40–53 μm, 60 Å). SiliaFlash® Irregular silica gel P60 (40–63 μm, 230–400 mesh) was used as received.

**Materials.** Commercial reagents were purchased from Sigma Aldrich, VWR, Fisher, Oakwood, or Strem, and used as received with the following exceptions. Dichloromethane, tetrahydrofuran (THF), dimethylformamide (DMF) and toluene were dried by passing through activated alumina columns. Nickel(II) acetylacetonate and zinc(II) bromide were purchased from Strem and stored at room temperature in a N<sub>2</sub>-filled glovebox. *n*-Butyllithium was purchased from Sigma Aldrich and titrated with diphenylacetic acid prior to use.<sup>1</sup> Anhydrous pyridine was purchased from Sigma Aldrich in a Sure/Seal bottle. *N*-Iodosuccinimide was purchased from Oakwood and recrystallized from Et<sub>2</sub>O:dioxane (1:1) prior to use.

**Instrumentation.** Proton nuclear magnetic resonance (<sup>1</sup>H NMR) spectra were recorded on a Bruker 500 AVANCE spectrometer or a Bruker NB 300 spectrometer (500 and 300 MHz, respectively). Proton chemical shifts are reported in parts per million downfield from tetramethylsilane and referenced to residual protium in the NMR solvent (CDCl<sub>3</sub> = δ 7.26 ppm, C<sub>6</sub>D<sub>6</sub> = δ 7.16 ppm). Carbon nuclear magnetic resonance (<sup>13</sup>C NMR) spectra were recorded on a Bruker 500 AVANCE spectrometer (125 MHz). Chemical shifts for carbon are reported in parts per million downfield from tetramethylsilane and are referenced to the carbon resonances of the solvent residual peak (CDCl<sub>3</sub> = δ 77.00 ppm, C<sub>6</sub>D<sub>6</sub> = δ 128.06 ppm). <sup>19</sup>F spectra (282 MHz) and <sup>31</sup>P spectra (121 MHz) were recorded on a Bruker NB 300 spectrometer; chemical shifts are reported in parts per million. VT-NMR experiments were performed on a Varian Inova 400 spectrometer. <sup>13</sup>C,<sup>19</sup>F-HMQC experiments were performed on a Bruker 800 AVANCE spectrometer. NMR data are represented as follows: chemical shift (δ ppm), multiplicity (s = singlet, d = doublet, t = triplet, q = quartet, m = multiplet), coupling constant in Hertz (Hz), integration. Peaks attributed to rotamers have been denoted in square brackets, with the major rotamer marked with an asterisk, where applicable.

High-resolution mass spectra were obtained on an Agilent 6220 using electrospray ionization time-of-flight (ESI-TOF). FT-IR spectra were recorded on a Perkin-Elmer Spectrum 100 and are reported in terms of frequency of absorption (cm<sup>-1</sup>). Reversed-phase liquid chromatography/mass spectrometry (LC/MS) was performed on an Agilent 1260 Infinity analytical LC and Agilent 6120 Quadrupole LC/MS system, using electrospray ionization/atmospheric-pressure chemical ionization (ESI/APCI), and UV detection at 254 and 280 nm. High-performance liquid chromatography (HPLC) was performed on an

---

<sup>1</sup> Kofron, W. G.; Baclawski, L. M. *J. Org. Chem.* **1976**, *41*, 1879–1880.

Agilent 1200 series instrument with a binary pump and a diode array detector, using Chiralcel OD-H (25 cm x 0.46 cm), Chiralcel OJ-H (25 cm x 0.46 cm), Chiralpak AS-H (25 cm x 0.46 cm), Chiralpak AD-H (25 cm x 0.46 cm), and Regis (*S,S*) Whelk-O 1 (25 cm x 0.46 cm) columns. Gas chromatography (GC) was performed on an Agilent 7890A series instrument equipped with a split-mode capillary injection system and flame ionization detectors using a Cyclodex-B (30 m x 0.25 mm) column. Optical rotations were taken with a Jasco P-1010 polarimeter Na/Hal lamp with a 0.5 dm/1 mL cell in spectral grade CHCl<sub>3</sub>. Where noted, low-temperature reactions were performed in a Thermo Scientific Neslab CB 80 Cryocool.

**Absolute Configuration.** The absolute configurations of compounds **1–14** were assigned by analogy to compound **15**. Compound **15**'s absolute configuration was determined by comparison of the optical rotation to that reported for *ent-15* in the literature.<sup>2</sup>

---

<sup>2</sup> Hussain, S.; Leipold, F.; Man, H.; Wells, E.; France, S. P.; Mulholland, K. R.; Grogan, G.; Turner, N. J. *ChemCatChem* **2015**, *7*, 579–583.

## II. General Procedures

### Pyridinium Arylation on 0.5-mmol Scale:

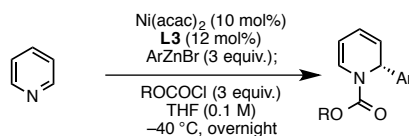

In a nitrogen-filled glovebox, **L3** (30.1 mg, 0.0600 mmol, 0.12 equiv.) was added to a threaded 16 mm x 100 mm glass vial and dissolved in THF (0.5 mL). To this solution was added Ni(acac)<sub>2</sub> (12.9 mg, 0.0500 mmol, 0.10 equiv.), followed by THF (0.5 mL). Arylzinc halide (prepared as a 0.60 M solution in THF/hexanes, 2.5 mL, 1.5 mmol, 3.0 equiv.) was added to the Ni/ligand solution. Upon addition of the zinc halide, the solution immediately turned from green and translucent to dark brown and opaque. The glass vial was sealed with a plastic cap lined with a Teflon septum, wrapped with electrical tape, and removed from the glovebox.

Separately, a threaded 16 mm x 100 mm glass vial equipped with a stir bar was put under a nitrogen atmosphere. To this vial was added anhydrous pyridine (39.5 mg, 0.500 mmol, 1.0 equiv.) by weight. The pyridine was dissolved in THF (1 mL), and the Ni/ligand/nucleophile solution was added to the pyridine solution at rt *via* syringe. The vial containing this solution was transferred to a -40 °C Cryocool, and chloroformate (1.5 mmol, 3.0 equiv.) was added at this temperature. The reaction was left to stir at -40 °C overnight (approximately 14 h).

The reaction was quenched with ~5 mL of water and stirred for 10 min at rt. The resulting mixture was diluted with diethyl ether, and the aqueous layer was extracted with diethyl ether (3 x 30 mL). The combined organic layers were dried over MgSO<sub>4</sub>, and the filtrate was concentrated *in vacuo*. The crude mixture was purified by automated column chromatography (typically 1→10% EtOAc in hexanes) to give the product dihydropyridine.

### Pyridinium Arylation on 5-mmol Scale:

Under air, **L3** (301 mg, 0.600 mmol, 0.12 equiv.) and Ni(acac)<sub>2</sub> (128 mg, 0.500 mmol, 0.10 equiv.) were added to a flame-dried, 50-mL pear-shaped flask. This flask was sealed with a septum and evacuated/refilled with N<sub>2</sub> (x3). The Ni and ligand were dissolved in dry, degassed THF (10 mL). Arylzinc bromide solution (0.60 M in THF/hexanes, 25 mL, 15 mmol, 3.0 equiv.) was added to the Ni/ligand solution, resulting in an immediate color change from green to dark brown.

Pyridine (0.40 mL, 5.0 mmol, 1.0 equiv.) was added under N<sub>2</sub> to a flame-dried, 100-mL Schlenk flask equipped with a stir bar, and dissolved in THF (10 mL). To the pyridine solution was added the Ni/ligand/ArZnBr solution *via* syringe. The reaction mixture was cooled to -78 °C, and *i*-BuOCOCl (1.9 mL, 15 mmol, 3.0 equiv.) was added at this temperature. Then, the reaction mixture was transferred to a -40 °C Cryocool, where it was allowed to stir overnight (approximately 14 h).

The reaction was quenched with water (40 mL) and allowed to stir at rt for 10 min. The solution was extracted with Et<sub>2</sub>O (3 x 50 mL), and the combined organic fractions were washed with brine (1 x 100 mL). The organic layer was dried over MgSO<sub>4</sub> and the filtrate was concentrated *in vacuo*. The crude material was purified by automated column chromatography (1→10% EtOAc in hexanes) to give the product dihydropyridine as an oil.

#### Formation of Arylzinc Bromide Solutions<sup>3</sup>:

The following procedure was used to prepare the arylzinc bromide solutions, except where noted in Section V.

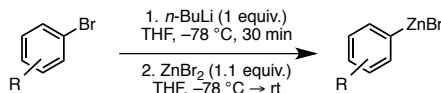

A 50-mL recovery flask equipped with a stir bar was flame dried under vacuum and put under N<sub>2</sub>. Bromoarene (7.5 mmol, 1.0 equiv.) was added and dissolved in THF (4 mL). The bromoarene solution was cooled to -78 °C and *n*-BuLi (titrated as 2.2 M in hexanes, 3.4 mL, 7.5 mmol, 1.0 equiv.) was added dropwise. The reaction mixture was allowed to stir at -78 °C for 30 min.

Meanwhile, ZnBr<sub>2</sub> (1.86 g, 8.25 mmol, 1.1 equiv.) was weighed into a 50-mL pear-shaped flask under N<sub>2</sub>. To the solid was added THF (5 mL), and the mixture was placed in a sonicator until the ZnBr<sub>2</sub> had completely dissolved.

After 30 min had elapsed, the ZnBr<sub>2</sub> solution was added in one portion to the aryllithium solution at -78 °C. After stirring for 5 min at this temperature, the solution was allowed to warm to rt. If, after warming to rt, the ArZnBr solution was biphasic, more THF was added in 0.5-mL increments with vigorous stirring until a monophasic solution resulted. The ArZnBr solution (nominally 0.6 M) was stored in a N<sub>2</sub>-filled glovebox.

#### Racemic Standards:

Racemic standards for **1–6** were prepared in one of two ways: (1) following the “pyridinium arylation on 0.5-mmol scale” procedure, except with PPh<sub>3</sub> (16 mg, 0.060 mmol, 0.12 equiv.) in place of **L3**, or (2) reaction of the appropriate pyridinium salt (prepared *in situ* from pyridine and chloroformate) with the appropriate Grignard reagent in THF.

Racemic standards for **7–14** were prepared from (**±**)-**5a** according to the procedures outlined in Section VI. Similarly, the racemic standard for **15** was prepared from (**±**)-**4**.

<sup>3</sup> Jensen, A.E.; Kneisel, F.; Knochel, P. *Org. Synth.* **2004**, *Coll. Vol 10*, 391.

### III. Ligand Synthesis/Characterization

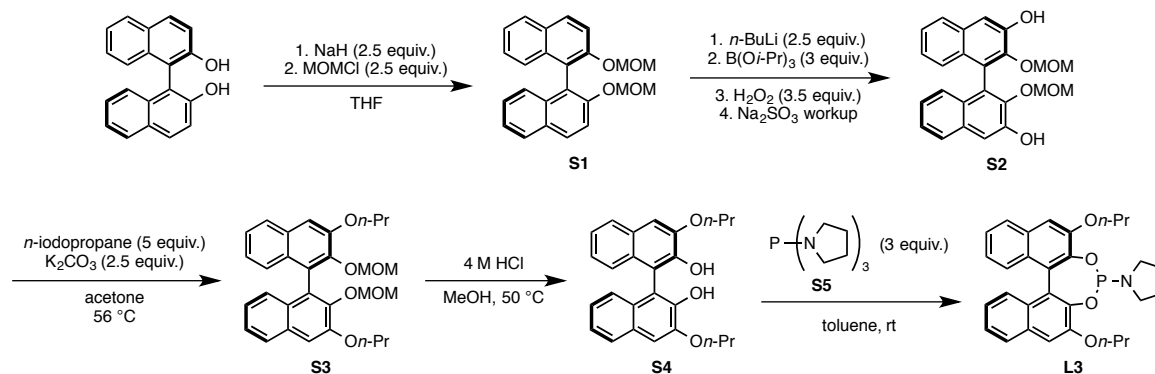

**(R)-2,2'-bis(methoxymethoxy)-1,1'-binaphthalene (S1)**<sup>4</sup>: A flame-dried, 1-L round-bottomed flask equipped with a stir bar was charged with (R)-BINOL (30.3 g, 106 mmol, 1.0 equiv.) in dry THF (120 mL). The reaction mixture was cooled to 0 °C and sodium hydride (10.6 g, 264 mmol, 2.5 equiv.) was added portionwise to give a yellow solution. The reaction mixture was warmed to rt and allowed to stir 1 h. The reaction mixture was cooled to 0 °C and MOMCl (20 mL, 260 mmol, 2.5 equiv.) was added *via* syringe. The reaction mixture was allowed to stir at 0 °C for 10 min, then warmed to rt and allowed to stir overnight. The reaction was quenched with sat. NH<sub>4</sub>Cl (100 mL) and diluted with water (100 mL). The resulting mixture was extracted with Et<sub>2</sub>O (3 x 100 mL) and the combined organic layers were dried with MgSO<sub>4</sub> and filtered. The filtrate was concentrated *in vacuo* and the crude product was recrystallized from hexanes:EtOAc (1:1) to give **S1** as a beige solid (34 g, 91 mmol, 86%). All characterization data matched literature values.

**<sup>1</sup>H NMR (500 MHz, CDCl<sub>3</sub>)**: δ 7.95 (d, *J* = 9.0 Hz, 2H), 7.87 (d, *J* = 8.1 Hz, 2H), 7.57 (d, *J* = 9.0 Hz, 2H), 7.34 (t, *J* = 8.0 Hz, 2H), 7.22 (m, 2H), 7.15 (d, *J* = 8.5 Hz, 2H), 5.03 (dd, *J* = 53.5, 6.8 Hz, 4H), 3.14 (s, 6H) ppm.

**(R)-2,2'-bis(methoxymethoxy)-[1,1'-binaphthalene]-3,3'-diol (S2)**<sup>5</sup>: A flame-dried, 500-mL round-bottomed flask equipped with a stir bar was charged with **S1** (10 g, 27 mmol, 1.0 equiv.) in dry THF (75 mL). The reaction mixture was cooled to -78 °C and *n*-BuLi (2.5 M in hexanes, 27 mL, 67 mmol, 2.5 equiv.) was added to the stirring solution. The solution was allowed to stir at 0 °C for 1 h. The solution was cooled to -78 °C and triisopropyl borate (19 mL, 82 mmol, 3.1 equiv.) was added dropwise. The reaction mixture was warmed to rt and stirred overnight, then concentrated *in vacuo* to give an orange solid. Benzene (100 mL) was added and the solution was cooled to 0 °C. Aqueous hydrogen peroxide (30 wt%, 11 mL, 97 mmol, 3.6 equiv.) was added, and the solution was allowed to stir at 0 °C for 2 h. The reaction mixture was quenched with sat. aq. Na<sub>2</sub>SO<sub>3</sub> (150 mL) and extracted with Et<sub>2</sub>O (3 x 100 mL). The combined organic portions were dried with MgSO<sub>4</sub> and filtered, and the filtrate was concentrated *in vacuo* to give an orange oil. Hexanes were added to the oil and a solid precipitated from solution, and the hexanes were then removed *in vacuo*. The addition of hexanes to precipitate product followed by removing the hexanes *in vacuo* was carried out a total of three times to give crude **S2** as an orange solid (11.3 g, 27.7 mmol, 104%) that was carried directly on to the next step of the synthesis without purification.

<sup>4</sup> Wu, T. R.; Shen, L.; Chong, J. M. *Org. Lett.* **2004**, *6*, 2701–2704.

<sup>5</sup> Ooi, T.; Kameda, M.; Maruoka, K.; *J. Am. Chem. Soc.* **2003**, *125*, 5139–5151.

**<sup>1</sup>H NMR (300 MHz, CDCl<sub>3</sub>):** δ 7.77 (d, *J* = 8.2 Hz, 2H), 7.50 (s, 2H), 7.42 (s, 2H), 7.37 (t, *J* = 7.7 Hz, 2H), 7.12 (t, *J* = 7.6 Hz, 2H), 7.04 (d, *J* = 8.1 Hz, 2H), 4.74–4.57 (m, 4H), 3.39 (s, 6H) ppm.

**(*R*)-2,2'-bis(methoxymethoxy)-[1,1'-binaphthalene]-3,3'-diol (S3)<sup>5</sup>:** A 200-mL recovery flask equipped with a stir bar was charged with **S2** (11.3 g, 27.7 mmol, 1.0 equiv.) dissolved in acetone (20 mL). K<sub>2</sub>CO<sub>3</sub> (9.6 g, 69 mmol, 2.5 equiv.) and 1-iodopropane (13.5 mL, 139 mmol, 5.0 equiv.) were added to the solution. The flask was capped with a reflux condenser and the solution was stirred at reflux overnight. The reaction was quenched with water (80 mL) and diluted with Et<sub>2</sub>O (40 mL), then extracted with Et<sub>2</sub>O (4 x 30 mL), dried with MgSO<sub>4</sub>, and filtered. The filtrate was concentrated *in vacuo* to give an orange solid (10.3 g, 21.0 mmol, 76%), which was used directly in the next step without further purification.

**<sup>1</sup>H NMR (300 MHz, CDCl<sub>3</sub>):** δ 7.73 (d, *J* = 8.2 Hz, 2H), 7.34 (t, *J* = 8.0 Hz, 2H), 7.28 (s, 2H), 7.19–7.05 (m, 4H), 4.95 (dd, *J* = 49.2, 5.7 Hz, 4H), 4.13 (t, *J* = 6.4 Hz, 4H), 2.52 (s, 6H), 2.04–1.85 (m, 4H), 1.11 (t, *J* = 7.4 Hz, 6H) ppm.

**(*R*)-3,3'-dipropoxy-[1,1'-binaphthalene]-2,2'-diol (S4):** A 200-mL recovery flask equipped with a stir bar was charged with **S3** (10.3 g, 21.0 mmol) dissolved in MeOH (30 mL). Aqueous HCl (4 M, 21 mL) was added, and the reaction mixture was allowed to stir at 50 °C for 36 h. The reaction mixture was diluted with water (40 mL) and Et<sub>2</sub>O (30 mL), then extracted with Et<sub>2</sub>O (3 x 30 mL). The combined organic portions were dried with MgSO<sub>4</sub> and filtered, and the filtrate was concentrated *in vacuo* to give a yellow solid. The crude product mixture was purified using automated column chromatography (5 → 30% EtOAc in hexanes) to give the product as a crystalline, beige solid (4.02 g, 10.0 mmol, 48%).

**<sup>1</sup>H NMR (500 MHz, CDCl<sub>3</sub>):** δ 7.75 (d, *J* = 8.2 Hz, 2H), 7.33–7.28 (m, 2H), 7.27 (s, 2H), 7.17–7.14 (m, 2H), 7.14–7.11 (m, 2H), 6.00 (s, 2H), 4.28–4.18 (m, 4H), 1.96 (sext., *J* = 7.3 Hz, 4H), 1.11 (t, *J* = 7.4 Hz, 6H) ppm.

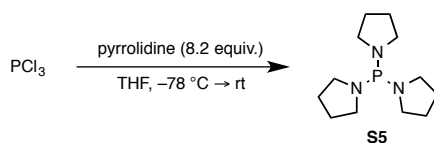

**Tri(pyrrolidin-1-yl)phosphane (S5)<sup>6</sup>:** In a flame-dried 1-L round-bottomed flask under N<sub>2</sub>, pyrrolidine (40 mL, 490 mmol, 8.2 equiv.) was dissolved in dry THF (250 mL). The solution was cooled to –78 °C and PCl<sub>3</sub> (5.2 mL, 59 mmol, 1.0 equiv.) was added dropwise. The reaction was allowed to warm to rt, and it was allowed to stir at this temperature overnight. At this time, the solid was removed by means of a Schlenk filter, and the filtrate was collected in a flame-dried 500-mL Schlenk flask. The solvent was removed *in vacuo* to give a pale yellow oil (12.7 g, 52.5 mmol, 88%), which was used directly in the next step with no further purification. (The NMR spectra were taken in C<sub>6</sub>D<sub>6</sub> because **S5** was found to oxidize rapidly in CDCl<sub>3</sub>).

**<sup>1</sup>H NMR (500 MHz, C<sub>6</sub>D<sub>6</sub>):** δ 3.12 (td, *J* = 6.6, 4.2 Hz, 12H), 1.60 (m, 12H) ppm.

**<sup>31</sup>P NMR (121 MHz, C<sub>6</sub>D<sub>6</sub>):** δ 104.18 (s) ppm.

<sup>6</sup> Boltukhina, E. V.; Sheshenev, A. E.; Lyapkalo, I. M. *Tetrahedron*, **2011**, *67*, 5382–5388.

**(R)-1-(2,6-dipropoxydinaphtho[2,1-d:1',2'-f][1,3,2]dioxaphosphepin-4-yl)pyrrolidine (L3)**<sup>7</sup>: A 50-mL round-bottomed flask under N<sub>2</sub> equipped with a stir bar was charged with **S4** (4.57 g, 11.4 mmol, 1.0 equiv.) in toluene (20 mL). **S5** (7.9 mL, 34 mmol, 3.0 equiv.) was added, and the reaction mixture was allowed to stir for 3 h at rt. The toluene was removed *in vacuo* to give a yellow oil. Diethyl ether was added to precipitate the ligand, which was collected in a fritted funnel as a white, crystalline solid (3.2 g, 6.3 mmol, 56%). **L3** was stored in a N<sub>2</sub>-filled glovebox.

**<sup>1</sup>H NMR (500 MHz, CDCl<sub>3</sub>)**: δ 7.77 (d, *J* = 8.2 Hz, 2H), 7.40–7.31 (m, 2H), 7.31 (d, *J* = 9.3 Hz, 2H), 7.26–7.19 (m, 2H), 7.17–7.02 (m, 2H), 4.29–4.01 (m, 4H), 3.20 (dq, *J* = 11.1, 6.6, 5.9 Hz, 2H), 2.96–2.78 (m, 2H), 1.96 (tt, *J* = 14.2, 6.8 Hz, 4H), 1.73–1.59 (m, 4H), 1.12 (q, *J* = 7.5 Hz, 6H) ppm.

**<sup>13</sup>C NMR (125 MHz, CDCl<sub>3</sub>)**: δ 150.83 (d, *J* = 7.7 Hz), 142.76 (d, *J* = 13.2 Hz), 131.49 (d, *J* = 72.4 Hz), 127.67 (d, *J* = 9.5 Hz), 127.10 (d, *J* = 4.4 Hz), 126.98 (d, *J* = 9.4 Hz), 125.80 (d, *J* = 5.1 Hz), 125.11 (d, *J* = 24.6 Hz), 123.61 (d, *J* = 7.3 Hz), 108.40 (d, *J* = 81.5 Hz), 70.38 (d, *J* = 24.1 Hz), 45.45 (d, *J* = 15.3 Hz), 25.93 (d, *J* = 4.6 Hz), 22.71 (d, *J* = 36.9 Hz), 10.81 (d, *J* = 11.1 Hz) ppm.

**<sup>31</sup>P NMR (121 MHz, CDCl<sub>3</sub>)**: δ 151.03 ppm.

**HRMS**: The title compound appears to fragment completely on ionization; a mass of 403.1895, corresponding to [diol **S4** + H]<sup>+</sup>, was observed (C<sub>26</sub>H<sub>27</sub>O<sub>4</sub><sup>+</sup>, calc'd: 403.1904).

**FTIR (thin film, cm<sup>-1</sup>)**: 2965, 2936, 2874, 1595, 1440, 1247, 1109.

**Optical rotation**: [α]<sub>D</sub><sup>26</sup> -484.7 (c 1.0, CHCl<sub>3</sub>).

---

<sup>7</sup> Kangying, L.; Zhenghong, Z.; Guofeng, Z.; Chuchi, T.; *Heteroatom. Chem.* **2003**, *14*, 546–550.



#### IV. Additional Optimization

**Table S1.** Ligand evaluation. Reactions were run on a 0.05-mmol scale, and ee's were determined after Pd/C-catalyzed hydrogenation of **1** to the piperidine.

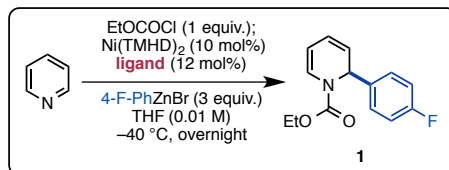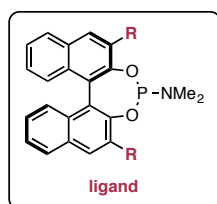

|        |                |                 |                     |                 |                    |
|--------|----------------|-----------------|---------------------|-----------------|--------------------|
| -H     | - <i>n</i> -Bu | -Ph             | - <i>i</i> -Pr      | -SPh            | -SiMe <sub>3</sub> |
| -2% ee | -38% ee        | 4% ee           | -4% ee              | <5% ee          | 54% ee             |
| -OMe   | -OEt           | - <i>On</i> -Pr | - <i>On</i> -pentyl | - <i>Oi</i> -Pr | - <i>Oi</i> -Bu    |
| -5% ee | 72% ee         | 84% ee          | 72% ee              | 20% ee          | 20% ee             |

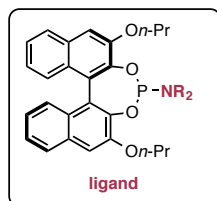

|                     |                    |               |               |                  |
|---------------------|--------------------|---------------|---------------|------------------|
| -NMe <sub>2</sub>   | -NEt <sub>2</sub>  | -N(OMe)Me     | -N(Me)Ph      | -N(Ph)Me         |
| 84% ee              | 4% ee              | 66% ee        | -44% ee       | -48% ee          |
| -N-cyclopentane     | -N-pyrrolidine     | -N-piperidine | -N-piperazine | -N-morpholine    |
| -33% ee             | 88% ee             | 52% ee        | 40% ee        | 66% ee           |
| -N(Me)-cyclopentane | -N(Me)-pyrrolidine | -N-imidazole  | -N-imidazole  | -N-benzimidazole |
| 68% ee              | 0% ee              | -6% ee        | -4% ee        | -8% ee           |

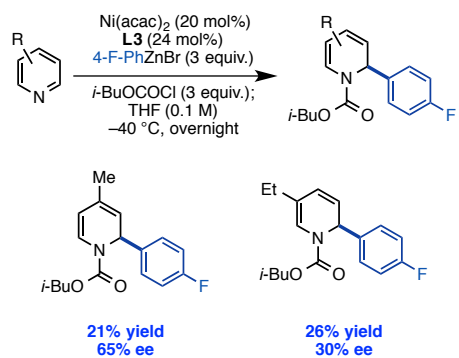

**Figure S1.** Preliminary results with alkyl-substituted electrophiles in the Ni-catalyzed arylation.

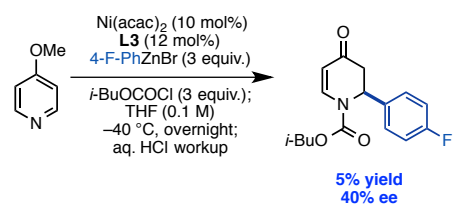

**Figure S2.** 4-Methoxypyridine electrophile in the Ni-catalyzed arylation.

## V. Characterization of Compounds 1–6

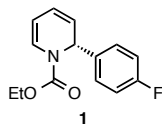

**(R)-Ethyl 2-(4-fluorophenyl)pyridine-1(2H)-carboxylate (1):** General procedure was followed with pyridine (42 mg, 0.53 mmol), providing **1** (84 mg, 0.34 mmol, 64% yield, 86% ee) as a clear, colorless oil. Note that the ee was determined after Pd/C-catalyzed hydrogenation to the piperidine.

**<sup>1</sup>H NMR (300 MHz, CDCl<sub>3</sub>):** δ 7.50–7.32 (m, 2H), 7.05–6.93 (m, 2H), 6.82 (dd, *J* = 54.1, 7.3 Hz, 1H), 6.19–5.93 (m, 1H), 5.94–5.69 (m, 1H), 5.70–5.53 (m, 1H), 5.39–5.14 (m, 1H), 4.19 (q, *J* = 7.1 Hz, 2H), 1.36–1.18 (m, 3H) ppm.

**<sup>13</sup>C NMR (125 MHz, CDCl<sub>3</sub>):** δ 162.56 (d, *J* = 245.4 Hz), [154.33, 153.79\*], [138.06, 137.00\*], [129.28\* (d, *J* = 8.0 Hz), 128.52 (d, *J* = 7.5 Hz)], [126.05, 125.26\*], 122.42, [121.21\*, 120.97], 115.41 (d, *J* = 21.4 Hz), [104.88\*, 104.75], [62.52\*, 62.44], [55.90, 54.87\*], [14.59\*, 14.53] ppm.

**<sup>19</sup>F NMR (282 MHz, CDCl<sub>3</sub>):** δ –114.51 (tt, *J* = 8.7, 5.4 Hz) ppm.

**HRMS:** (ESI-TOF) calculated for C<sub>14</sub>H<sub>15</sub>FNO<sub>2</sub> ([M+H]<sup>+</sup>): 248.1081, found: 248.1079.

**FTIR (thin film, cm<sup>-1</sup>):** 2985, 1706, 1509, 1324.

**Optical rotation (for the dihydropyridine):** [α]<sub>D</sub><sup>26</sup> +230.7 (c 1.1, CHCl<sub>3</sub>).

**HPLC (for the piperidine):** Chiralpak AS-H, 5% IPA in hexanes, 15 min run, 1 mL/min.

### Racemic Standard:

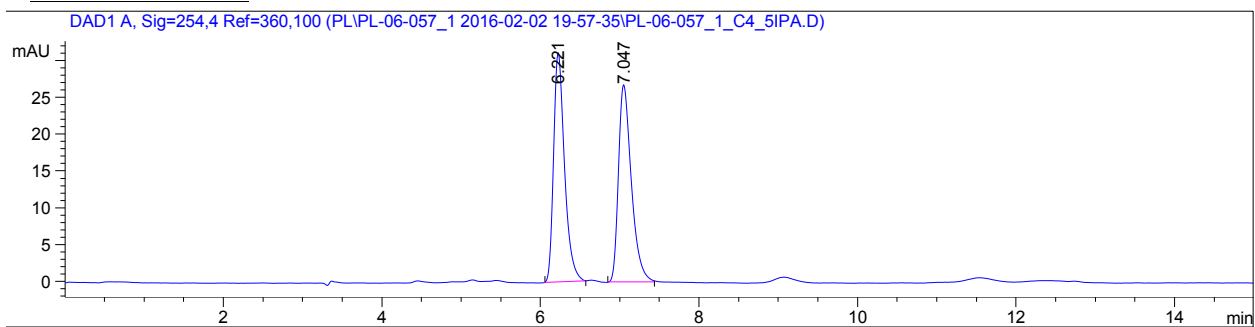

| Peak #   | RetTime [min] | Type | Width [min] | Area [mAU*s] | Height [mAU] | Area %  |
|----------|---------------|------|-------------|--------------|--------------|---------|
| 1        | 6.221         | BB   | 0.1460      | 299.02402    | 31.16124     | 49.6400 |
| 2        | 7.047         | BB   | 0.1720      | 303.36081    | 26.81054     | 50.3600 |
| Totals : |               |      |             | 602.38483    | 57.97178     |         |

### Enantioenriched:

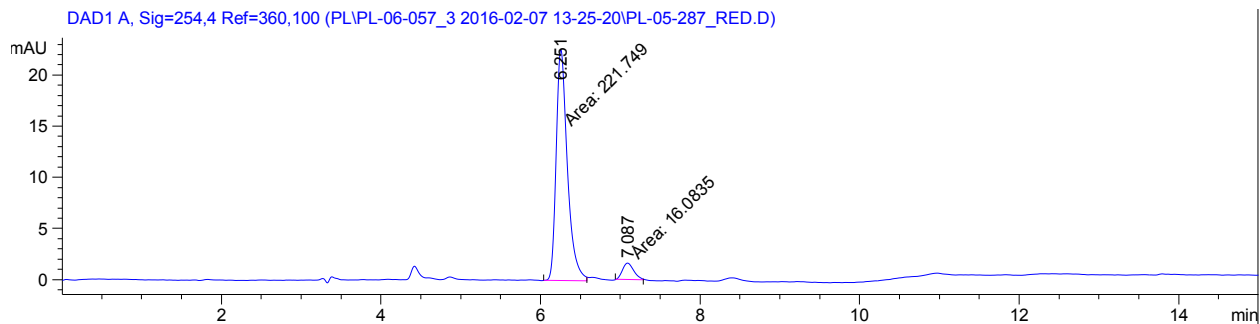

| Peak #   | RetTime [min] | Type | Width [min] | Area [mAU*s] | Height [mAU] | Area %  |
|----------|---------------|------|-------------|--------------|--------------|---------|
| 1        | 6.251         | MM   | 0.1631      | 221.74915    | 22.66359     | 93.2375 |
| 2        | 7.087         | MM   | 0.1655      | 16.08355     | 1.61962      | 6.7625  |
| Totals : |               |      |             | 237.83270    | 24.28320     |         |

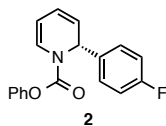

**(R)-Phenyl 2-(4-fluorophenyl)pyridine-1(2H)-carboxylate (2):** General procedure was followed with pyridine (40 mg, 0.50 mmol), providing **2** (53 mg, 0.18 mmol, 36% yield, 70% ee) as a clear, colorless oil.

**<sup>1</sup>H NMR (500 MHz, CDCl<sub>3</sub>):** δ 7.54–7.40 (m, 2H), 7.35 (q, *J* = 7.4 Hz, 2H), 7.31–7.26 (m, 1H), 7.22 (t, *J* = 7.4 Hz, 1H), 7.11 (d, *J* = 7.9 Hz, 1H), 7.06–6.99 (m, 2H), 6.98–6.84 (m, 1H), 6.11 (ddd, *J* = 44.6, 9.4, 5.6 Hz, 1H), 5.94 (d, *J* = 5.7 Hz, 1H), 5.78–5.63 (m, 1H), 5.42 (q, *J* = 6.0, 5.4 Hz, 1H) ppm.

**<sup>13</sup>C NMR (125 MHz, CDCl<sub>3</sub>):** δ [162.72\* (d, J = 246.5 Hz), 162.69 (d, J = 247.4 Hz)], [152.29, 150.96\*], [137.67, 136.10\* (d, J = 3.2 Hz)], [129.72\* (d, J = 8.2 Hz), 128.68 (d, J = 8.1 Hz)], [129.71\*, 129.64], [129.59, 129.52\*], [126.08, 125.92\*], [125.69, 124.81\*], [123.00, 122.81\*], [121.69\*, 121.64], [121.27\*, 120.84], 115.59 (app. t, J = 20.6 Hz), [106.15\*, 105.83], [56.62, 55.27\*] ppm.

**<sup>19</sup>F NMR (282 MHz, CDCl<sub>3</sub>):** δ [-113.93 (tt, J = 9.6, 5.8 Hz), -114.04\* (ddd, J = 14.1, 8.7, 5.4 Hz)] ppm.

**HRMS:** (ESI-TOF) calculated for C<sub>18</sub>H<sub>15</sub>FNO<sub>2</sub> ([M+H]<sup>+</sup>): 296.1081, found: 296.1083.

**FTIR (thin film, cm<sup>-1</sup>):** 3020, 1722, 1336, 1214.

**Optical rotation:** [α]<sub>D</sub><sup>26</sup> +449.3 (c 0.97, CHCl<sub>3</sub>).

**HPLC:** Chiralcel OD-H, 5% IPA in hexanes, 10 min run, 1 mL/min.

**Racemic Standard:**

DAD1 B, Sig=220,16 Ref=360,100 (BPW\BPW-II-032 2015-05-14 14-45-18\PL-05-061\_C3.D)

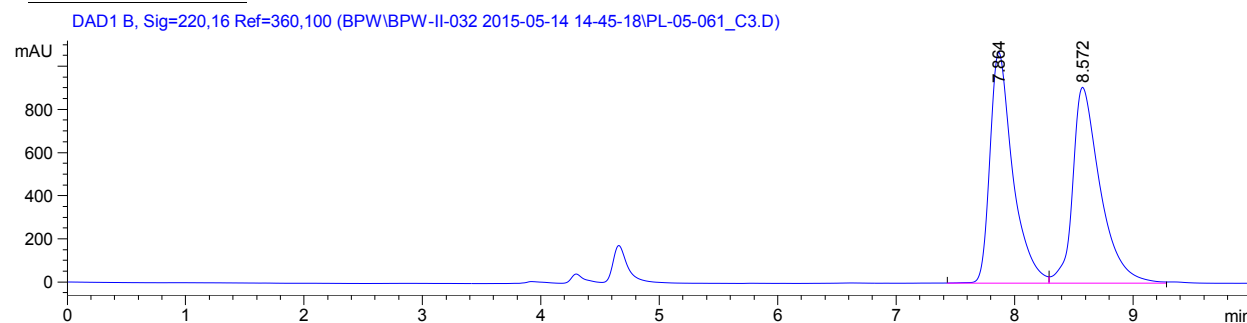

| Peak #   | RetTime [min] | Type | Width [min] | Area [mAU*s] | Height [mAU] | Area %  |
|----------|---------------|------|-------------|--------------|--------------|---------|
| 1        | 7.864         | BV   | 0.2006      | 1.43755e4    | 1071.23108   | 49.4559 |
| 2        | 8.572         | VV   | 0.2387      | 1.46918e4    | 908.39020    | 50.5441 |
| Totals : |               |      |             | 2.90673e4    | 1979.62128   |         |

## Enantioenriched:

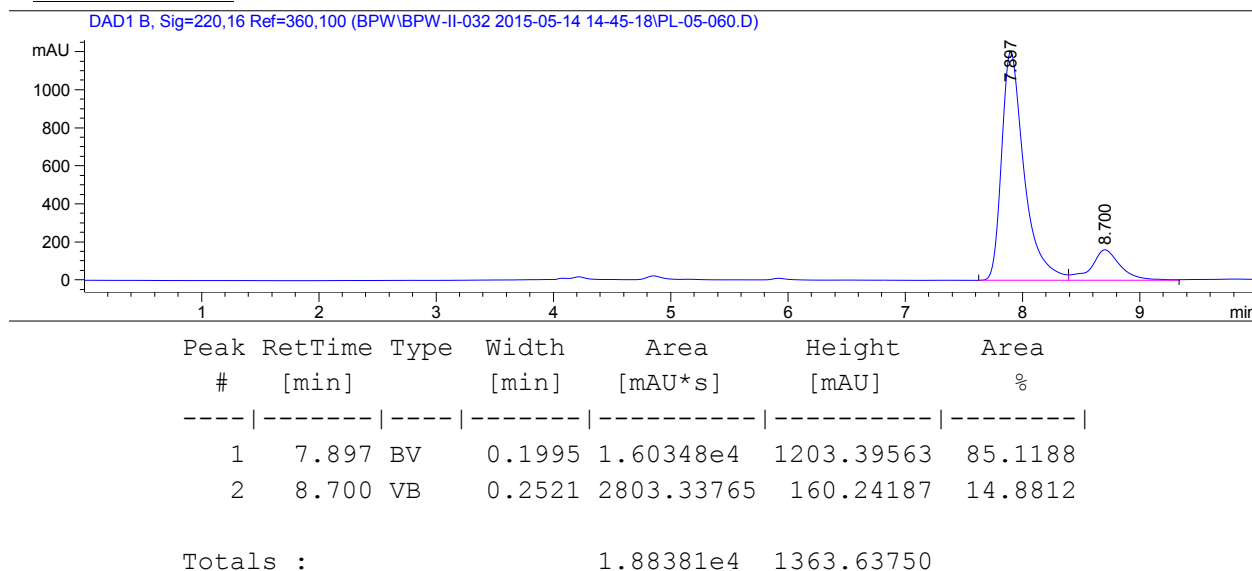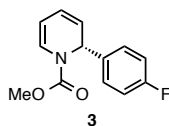

**(R)-Methyl 2-(4-fluorophenyl)pyridine-1(2H)-carboxylate (3):** General procedure was followed with pyridine (40 mg, 0.50 mmol), providing **3** (38 mg, 0.16 mmol, 32% yield, 83% ee) as a clear, colorless oil.

**<sup>1</sup>H NMR (300 MHz, CDCl<sub>3</sub>):** δ 7.58–7.29 (m, 2H), 7.08–6.94 (m, 2H), 6.80 (dd, *J* = 61.4, 7.7 Hz, 1H), 6.00–5.98 (m, 1H), 5.92–5.53 (m, 2H), 5.39–5.17 (m, 1H), 3.77 (s, 3H) ppm.

**<sup>13</sup>C NMR (125 MHz, CDCl<sub>3</sub>):** δ [162.58\* (d, *J* = 246.3 Hz), 162.52 (d, *J* = 246.8 Hz)], [154.86, 154.25\*], [137.81, 136.88\*], [129.30\* (d, *J* = 8.1 Hz), 128.36 (d, *J* = 7.7 Hz)], [125.99, 125.09\*], 121.49, [121.15\*, 121.03], [115.49 (d, *J* = 21.9 Hz), 115.42\* (d, *J* = 21.3 Hz)], 105.10, [55.73, 55.02\*], 53.43 ppm.

**<sup>19</sup>F NMR (282 MHz, CDCl<sub>3</sub>):** δ –114.42 ppm.

**HRMS:** (ESI-TOF) calculated for C<sub>13</sub>H<sub>13</sub>FNO<sub>2</sub> ([M+H]<sup>+</sup>): 234.0925, found: 234.0922.

**FTIR (thin film, cm<sup>-1</sup>):** 3019, 2956, 1709, 1508, 1442, 1338.

**Optical rotation:** [α]<sub>D</sub><sup>26</sup> +682.6 (c 1.1, CHCl<sub>3</sub>).

**HPLC:** Chiralcel OJ-H, 5% IPA in hexanes, 20 min run, 1 mL/min.

### Racemic Standard:

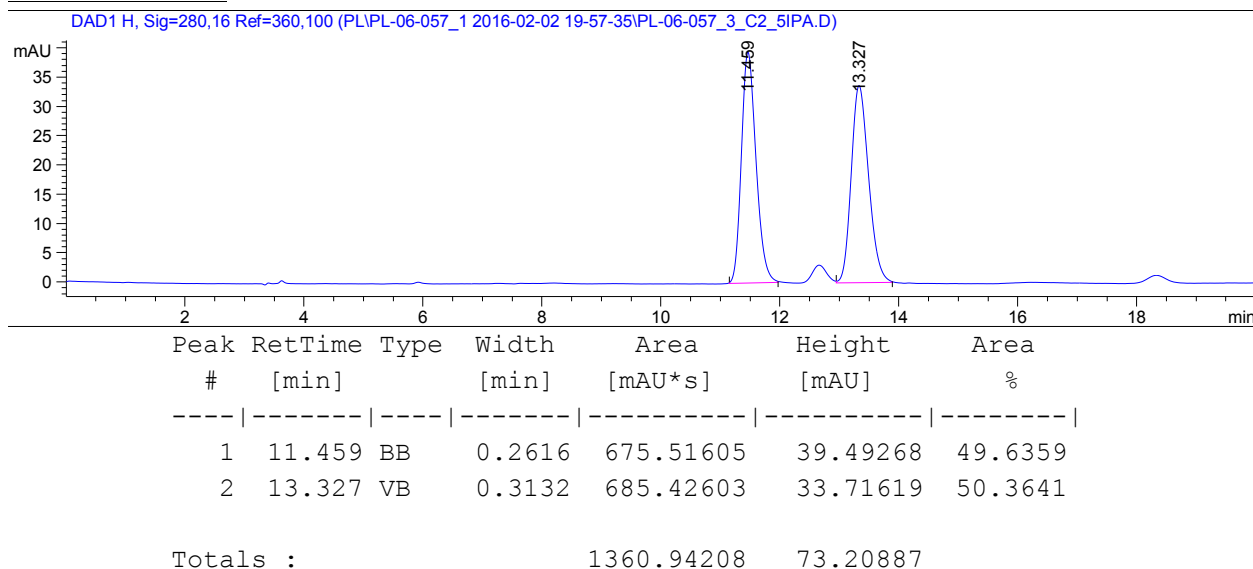

### Enantioenriched:

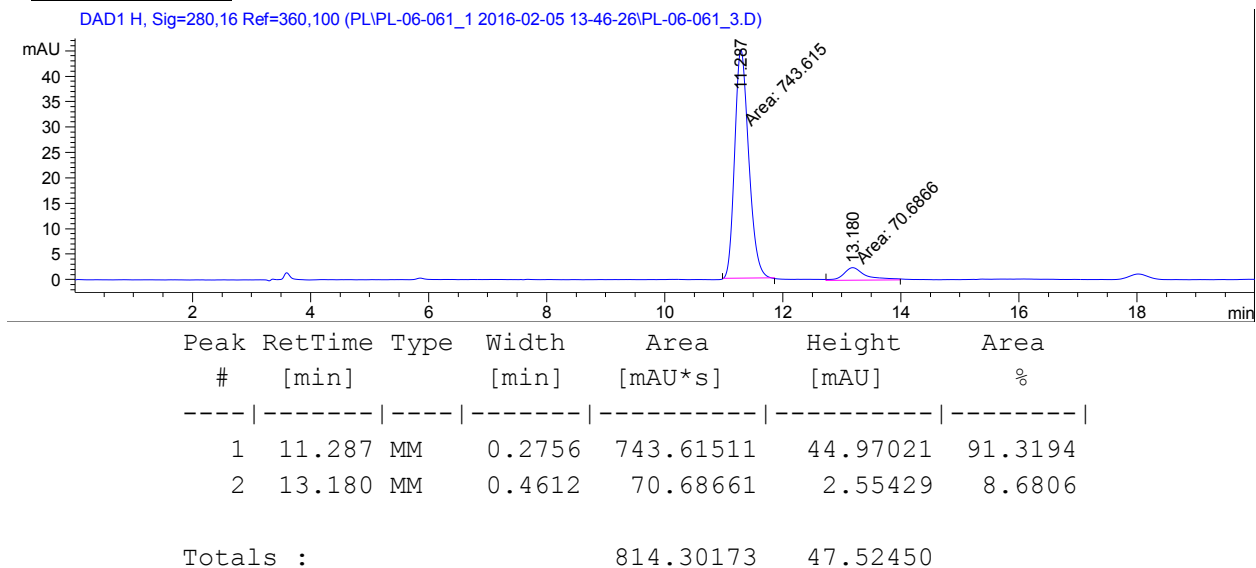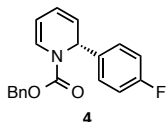

**(R)-Benzyl 2-(4-fluorophenyl)pyridine-1(2H)-carboxylate (4):** General procedure was followed with pyridine (40 mg, 0.50 mmol), providing **4** (109 mg, 0.35 mmol, 70% yield, 88% ee) as a clear, colorless oil.

**<sup>1</sup>H NMR (500 MHz, CDCl<sub>3</sub>):** 7.48–7.30 (m, 6H), 7.25–7.17 (m, 1 H), 7.00 (t, *J* = 8.5 Hz, 1H), 6.95–6.92 (m, 1H), 6.75 (d, *J* = 7.7 Hz, 1H), 6.02 (ddd, *J* = 37.3, 8.9, 5.5 Hz, 1H), 5.80 (dd, *J* = 85.0, 5.0 Hz, 1H), 5.69–5.50 (m, 1H), 5.36–5.19 (m, 2H), 5.19–5.10 (m, 1H) ppm.

**<sup>13</sup>C NMR (125 MHz, CDCl<sub>3</sub>):** δ 160.79 (d, *J* = 239.4 Hz), 150.84, 133.41, [129.51, 128.49\*], [129.30 (d, *J* = 8.3 Hz), 129.03\* (d, *J* = 12.1 Hz)], [128.71\*, 128.65], [128.36, 128.29\*], [125.96, 125.10\*], [122.65\*, 122.55], [121.15\*, 120.75], 115.45 (d, *J* = 21.4 Hz), [105.20\*, 104.97], 73.60, 68.18, [56.12, 55.11\*] ppm.

**<sup>19</sup>F NMR (282 MHz, CDCl<sub>3</sub>):** δ [-114.39\*, -114.52] ppm.

**HRMS:** (ESI-TOF) calculated for C<sub>19</sub>H<sub>17</sub>FNO<sub>2</sub> ([M+H]<sup>+</sup>): 310.1238, found: 310.1241.

**FTIR (thin film, cm<sup>-1</sup>):** 3038, 1775, 1710, 1508, 1392, 1323.

**Optical rotation:** [α]<sub>D</sub><sup>26</sup> +494.7 (c 1.1, CHCl<sub>3</sub>).

**HPLC:** Chiralpak AD-H, 2.5% IPA in hexanes, 30 min run, 1 mL/min.

**Racemic Standard:**

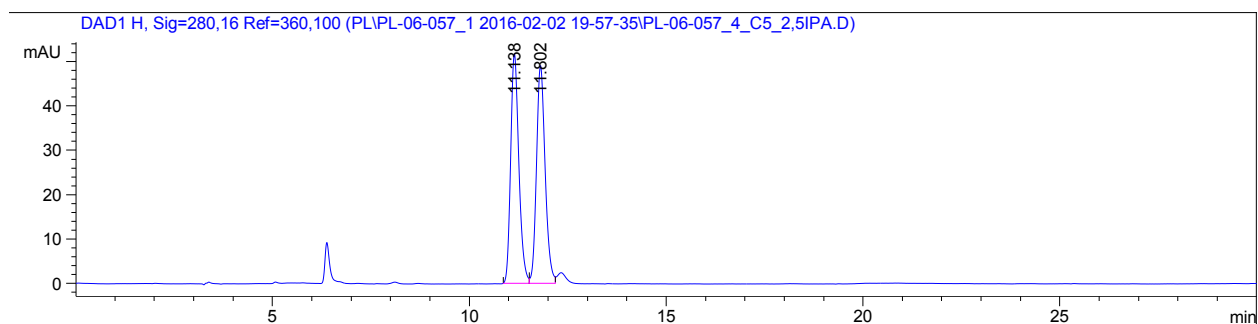

| Peak #   | RetTime [min] | Type | Width [min] | Area [mAU*s] | Height [mAU] | Area %  |
|----------|---------------|------|-------------|--------------|--------------|---------|
| 1        | 11.138        | BV   | 0.2212      | 751.78955    | 51.83438     | 49.9090 |
| 2        | 11.802        | VV   | 0.2351      | 754.53210    | 49.15238     | 50.0910 |
| Totals : |               |      |             | 1506.32166   | 100.98676    |         |



## Enantioenriched:

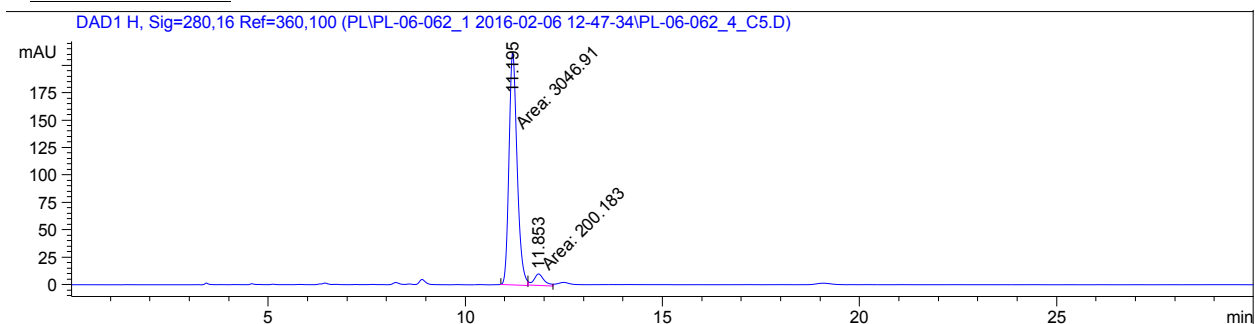

| Peak #   | RetTime [min] | Type | Width [min] | Area [mAU*s] | Height [mAU] | Area %  |
|----------|---------------|------|-------------|--------------|--------------|---------|
| 1        | 11.195        | MM   | 0.2397      | 3046.91138   | 211.81783    | 93.8350 |
| 2        | 11.853        | MM   | 0.3100      | 200.18286    | 10.76395     | 6.1650  |
| Totals : |               |      |             | 3247.09424   | 222.58178    |         |

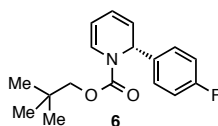

**(R)-Neopentyl 2-(4-fluorophenyl)pyridine-1(2H)-carboxylate (6):** General procedure was followed with pyridine (42 mg, 0.53 mmol), providing **6** (91 mg, 0.32 mmol, 60% yield, 92% ee) as a clear, colorless oil.

**<sup>1</sup>H NMR (500 MHz, CDCl<sub>3</sub>):** δ 7.53–7.28 (m, 2H), 7.05–6.65 (m, 3H), 6.16–5.91 (m, 1H), 5.80 (dd, *J* = 74.9, 5.0 Hz, 1H), 5.70–5.58 (m, 1H), 5.33–5.22 (m, 1H), 3.91–3.74 (m, 2H), 0.88 (d, *J* = 61.2 Hz, 9H) ppm.

**<sup>13</sup>C NMR (125 MHz, CDCl<sub>3</sub>):** δ 162.57 (d, *J* = 245.3 Hz), 153.91, [138.93, 136.97\*], [129.30\* (d, *J* = 8.1 Hz), 127.44 (d, *J* = 7.3 Hz)], [126.41, 125.07\*], [122.65, 122.46\*], [121.23\*, 120.44], [115.61 (d, *J* = 22.2 Hz), 115.41\* (d, *J* = 21.5 Hz)], [104.99\*, 104.66], [75.95, 75.84\*], [56.32, 54.93\*], [31.70\*, 30.46], [26.59\*, 26.48] ppm.

**<sup>19</sup>F NMR (282 MHz, CDCl<sub>3</sub>):** δ [−114.51\*, −114.78] ppm.

**HRMS:** (ESI-TOF) calculated for C<sub>17</sub>H<sub>21</sub>FNO<sub>2</sub> ([M+H]<sup>+</sup>): 290.1551, found: 290.1534.

**FTIR (thin film, cm<sup>−1</sup>):** 2961, 1709, 1508, 1384, 1323.

**Optical rotation:** [α]<sub>D</sub><sup>26</sup> +531.3 (c 1.2, CHCl<sub>3</sub>).

**HPLC:** Chiralcel OJ-H, 5% IPA in hexanes, 15 min run, 1 mL/min.

### Racemic Standard:

DAD1 H, Sig=280,16 Ref=360,100 (PL\PL-06-057\_1 2016-02-02 19-57-35\PL-06-057\_6\_C2\_5IPA.D)

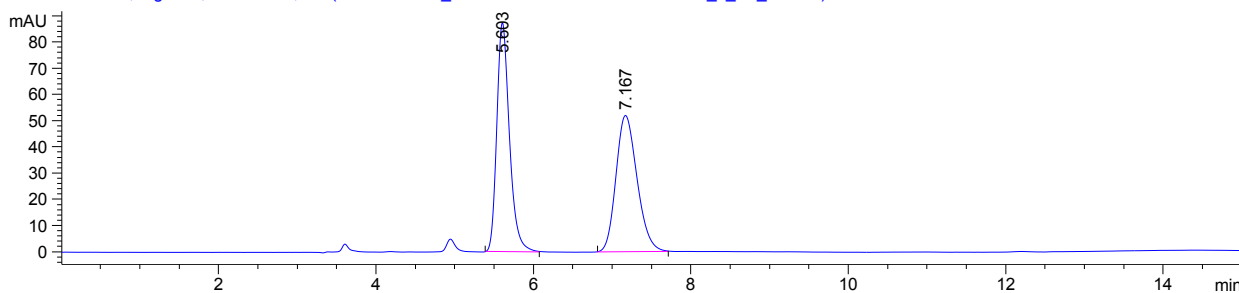

| Peak #   | RetTime [min] | Type | Width [min] | Area [mAU*s] | Height [mAU] | Area %  |
|----------|---------------|------|-------------|--------------|--------------|---------|
| 1        | 5.603         | BB   | 0.1702      | 975.90582    | 87.48016     | 50.1826 |
| 2        | 7.167         | BB   | 0.2892      | 968.80353    | 52.03045     | 49.8174 |
| Totals : |               |      |             | 1944.70935   | 139.51061    |         |

### Enantioenriched:

DAD1 H, Sig=280,16 Ref=360,100 (PL\PL-06-062\_2 2016-02-08 11-31-28\PL-06-062\_6\_REDO.D)

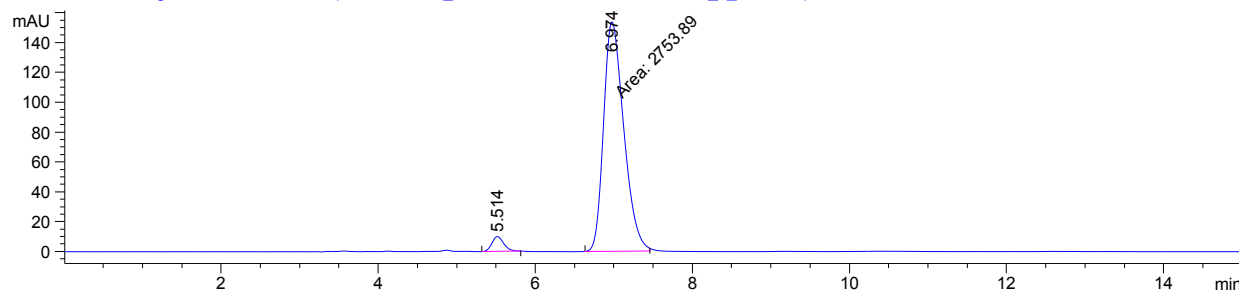

| Peak #   | RetTime [min] | Type | Width [min] | Area [mAU*s] | Height [mAU] | Area %  |
|----------|---------------|------|-------------|--------------|--------------|---------|
| 1        | 5.514         | BB   | 0.1635      | 107.58785    | 10.00349     | 3.7599  |
| 2        | 6.974         | MF   | 0.2983      | 2753.89111   | 153.85574    | 96.2401 |
| Totals : |               |      |             | 2861.47897   | 163.85924    |         |

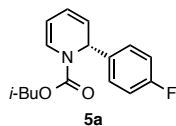

**(R)-Isobutyl 2-(4-fluorophenyl)pyridine-1(2H)-carboxylate (5a):** General procedure was followed with pyridine (39 mg, 0.50 mmol), providing **5a** (97 mg, 0.35 mmol 71% yield, 91% ee) as a clear, colorless oil (run 1). Run 2 provided 65% yield, 90% ee (run 2).

**<sup>1</sup>H NMR (300 MHz, CDCl<sub>3</sub>):** δ 7.50–7.29 (m, 2H), 7.06–6.46 (m, 3H), 6.23–5.92 (m, 1H), 5.91–5.70 (m, 1H), 5.70–5.59 (m, 1H), 5.28 (q, *J* = 6.7 Hz, 1H), 4.03–3.77 (m, 2H), 2.10–1.73 (m, 1H), 0.99–0.66 (m, 6H) ppm.

**<sup>13</sup>C NMR (125 MHz, CDCl<sub>3</sub>):** δ 162.57 (d, *J* = 246.6 Hz), 153.86, 137.02, [129.29\* (d, *J* = 7.8 Hz), 127.98 (d, *J* = 7.8 Hz)], [126.24, 125.17\*], [122.59, 122.45\*], [121.21\*, 120.66], [115.52 (d, *J* = 21.4 Hz), 115.41\* (d, *J* = 21.2 Hz)], [104.91\*, 104.65], [72.62, 72.59\*], [56.19, 54.92\*], [28.02\*, 27.96], 19.20, 19.09 ppm.

**<sup>19</sup>F NMR (282 MHz, CDCl<sub>3</sub>):** δ [−114.53\*, −114.65] ppm.

**HRMS:** (ESI-TOF) calculated for C<sub>16</sub>H<sub>19</sub>FNO<sub>2</sub> ([M+H]<sup>+</sup>): 276.1394, found: 276.1400.

**FTIR (thin film, cm<sup>−1</sup>):** 2963, 2876, 1706, 1507, 1401, 1383, 1321, 1256, 1110.

**Optical rotation:** [α]<sub>D</sub><sup>26</sup> +667.7 (c 0.96, CHCl<sub>3</sub>).

**HPLC:** Chiralcel OJ-H, 2.5% IPA in hexanes, 30 min run, 0.5 mL/min.

**Racemic Standard:**

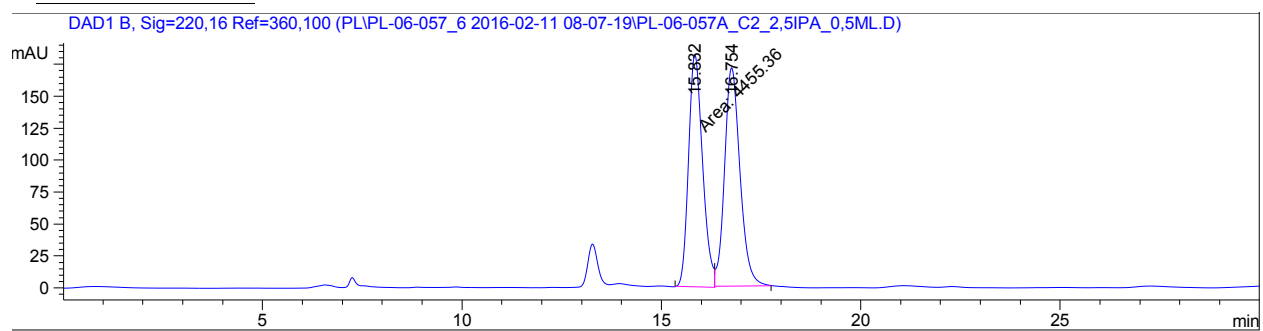

| Peak #   | RetTime [min] | Type | Width [min] | Area [mAU*s] | Height [mAU] | Area %  |
|----------|---------------|------|-------------|--------------|--------------|---------|
| 1        | 15.832        | MM   | 0.4082      | 4455.35986   | 181.90912    | 49.1347 |
| 2        | 16.754        | VB   | 0.4128      | 4612.28857   | 170.93433    | 50.8653 |
| Totals : |               |      |             | 9067.64844   | 352.84344    |         |

**Enantioenriched:**

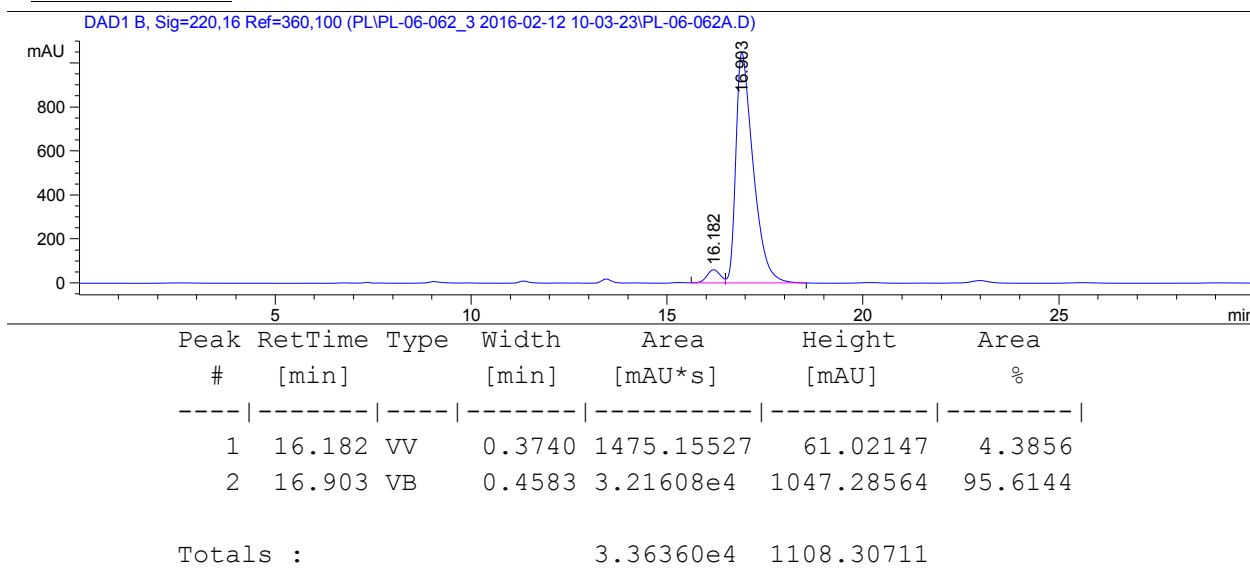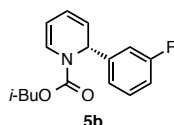

**(R)-Isobutyl 2-(3-fluorophenyl)pyridine-1(2H)-carboxylate (5b):** General procedure was followed with pyridine (42 mg, 0.53 mmol), providing **5b** (77 mg, 0.28 mmol, 52% yield, 91% ee) as a clear, colorless oil (run 1). Run 2 provided 56% yield, 91% ee.

**<sup>1</sup>H NMR (300 MHz, CDCl<sub>3</sub>):**  $\delta$  7.29 (dd,  $J$  = 7.8, 5.8 Hz, 1H), 7.25–7.03 (m, 2H), 7.03–6.70 (m, 2H), 6.13–5.93 (m, 1H), 5.81 (dd,  $J$  = 46.1, 5.3 Hz, 1H), 5.725.57 (m, 1H), 5.36–5.16 (m, 1H), 4.04–3.76 (m, 2H), 2.13–1.75 (m, 1H), 1.06–0.70 (m, 6H) ppm.

**<sup>13</sup>C NMR (125 MHz, CDCl<sub>3</sub>):**  $\delta$  163.11 (d,  $J$  = 246.1 Hz), [154.39, 153.81\*], [145.22 (d,  $J$  = 5.4 Hz), 143.81\* (d,  $J$  = 6.4 Hz)], [130.23 (d,  $J$  = 8.2 Hz), 130.07\* (d,  $J$  = 7.8 Hz)], [126.32, 125.30\*], [122.75, 121.56\*], [122.03, 122.00\*], [121.38\*, 120.92], 114.79 (app. t,  $J$  = 19.4 Hz), [114.14\* (d,  $J$  = 21.9 Hz), 113.08 (d,  $J$  = 21.8 Hz)], [104.95\*, 104.61], 72.64, [56.46, 55.17\*], [28.01\*, 27.91], 19.17, 19.01 ppm.

**<sup>19</sup>F NMR (282 MHz, CDCl<sub>3</sub>):**  $\delta$  [−112.77, −112.91\*] ppm

**HRMS:** (ESI-TOF) calculated for C<sub>16</sub>H<sub>19</sub>FNO<sub>2</sub> ([M+H]<sup>+</sup>): 276.1394, found: 276.1389.

**FTIR (thin film, cm<sup>−1</sup>):** 2963, 2875, 1707, 1589, 1400, 1383, 1320, 1254, 1110.

**Optical rotation:**  $[\alpha]_D^{26}$  +508.6 ( $c$  1.2, CHCl<sub>3</sub>).

**HPLC:** Chiralcel OJ-H, 5% IPA in hexanes, 15 min run, 1 mL/min.

**Racemic Standard:**

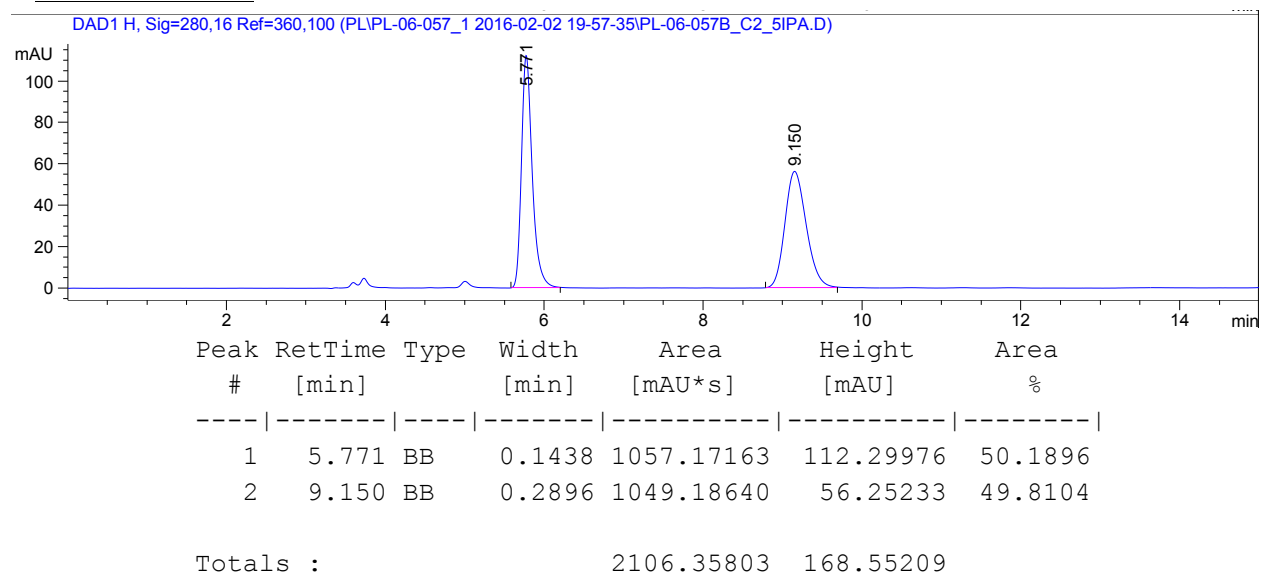

**Enantioenriched:**

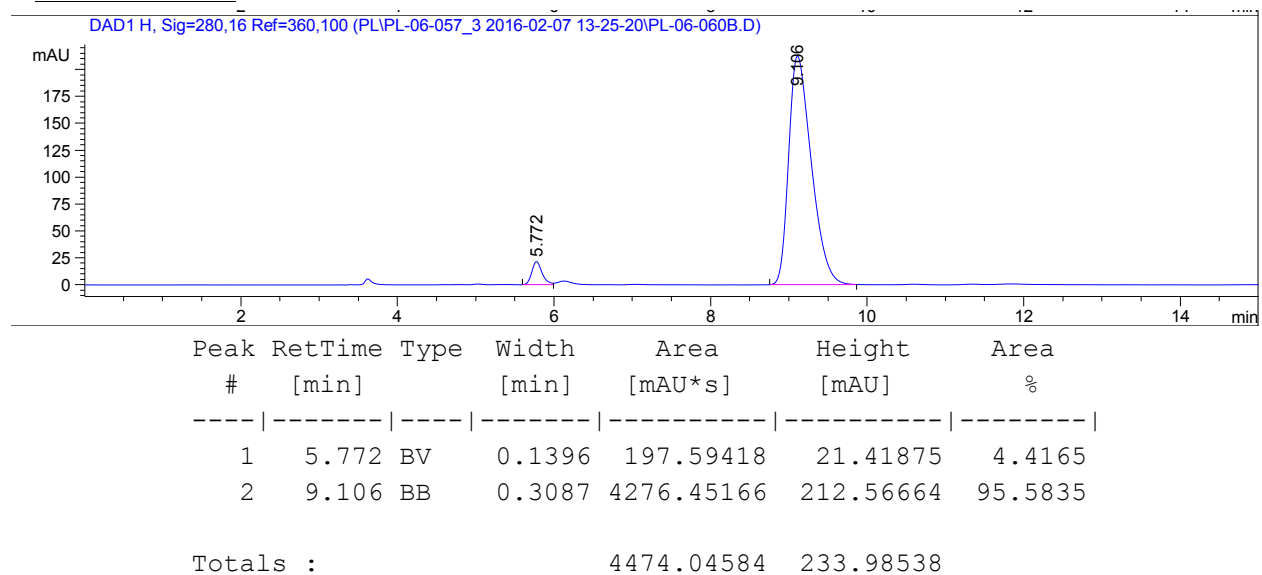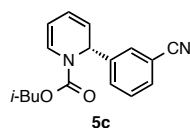

**(R)-Isobutyl 2-(3-cyanophenyl)pyridine-1(2H)-carboxylate (5c):** General procedure was followed with pyridine (41 mg, 0.52 mmol), with the following modification: *m*-CN-PhZnBr was prepared at -98 °C

(liquid nitrogen/MeOH bath, monitored with a thermocouple) instead of  $-78\text{ }^{\circ}\text{C}$ . **5c** (82 mg, 0.29 mmol, 56% yield, 90% ee was isolated as a clear, yellow oil (run 1). Run 2 provided 54% yield, 91% ee (run 2).

**$^1\text{H}$  NMR (300 MHz,  $\text{CDCl}_3$ ):**  $\delta$  8.09–7.52 (m, 3H), 7.43 (t,  $J = 7.8$  Hz, 1H), 6.88 (dd,  $J = 64.8, 8.1$  Hz, 1H), 6.28–5.97 (m, 1H), 5.84 (dd,  $J = 46.6, 6.2$  Hz, 1H), 5.71–5.54 (m, 1H), 5.41–5.23 (m, 1H), 4.01–3.78 (m, 2H), 2.10–1.79 (m, 1H), 1.14–0.61 (m, 6H) ppm.

**$^{13}\text{C}$  NMR (125 MHz,  $\text{CDCl}_3$ ):**  $\delta$  153.80, [143.94, 142.55\*], [131.91, 131.65\*], 131.14, [130.70\*, 129.98], [129.67, 129.45\*], [126.34, 125.31\*], [122.10\*, 121.67], [121.29, 121.21\*], [119.03\*, 118.81], [112.82, 112.77\*], [105.01\*, 104.80], 72.84, [56.19, 54.93\*], [28.02\*, 27.92], 19.18, 19.05 ppm.

**HRMS:** (ESI-TOF) calculated for  $\text{C}_{17}\text{H}_{19}\text{N}_2\text{O}_2$  ( $[\text{M}+\text{H}]^+$ ): 283.1441, found: 283.1423.

**FTIR (thin film,  $\text{cm}^{-1}$ ):** 3053, 2962, 2875, 2230, 1706, 1401, 1383, 1320, 1256, 1111.

**Optical rotation:**  $[\alpha]_D^{26} +620.7$  ( $c$  1.3,  $\text{CHCl}_3$ ).

**HPLC:** Chiralpak AD-H, 2.5% IPA in hexanes, 30 min run, 1 mL/min.

**Racemic Standard:**

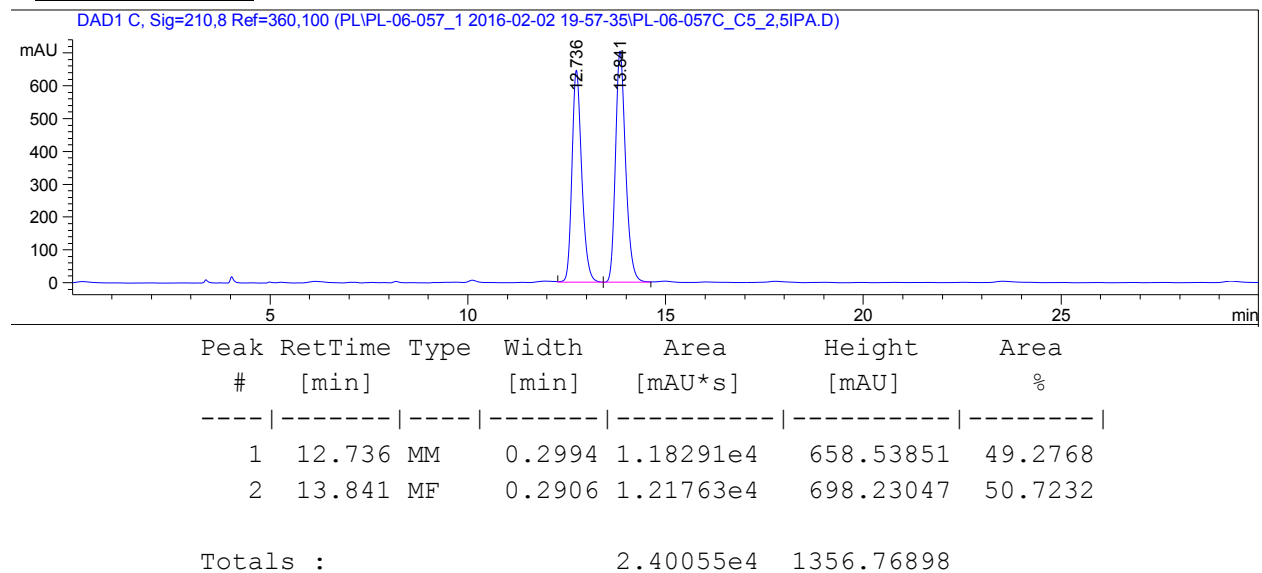

**Enantioenriched:**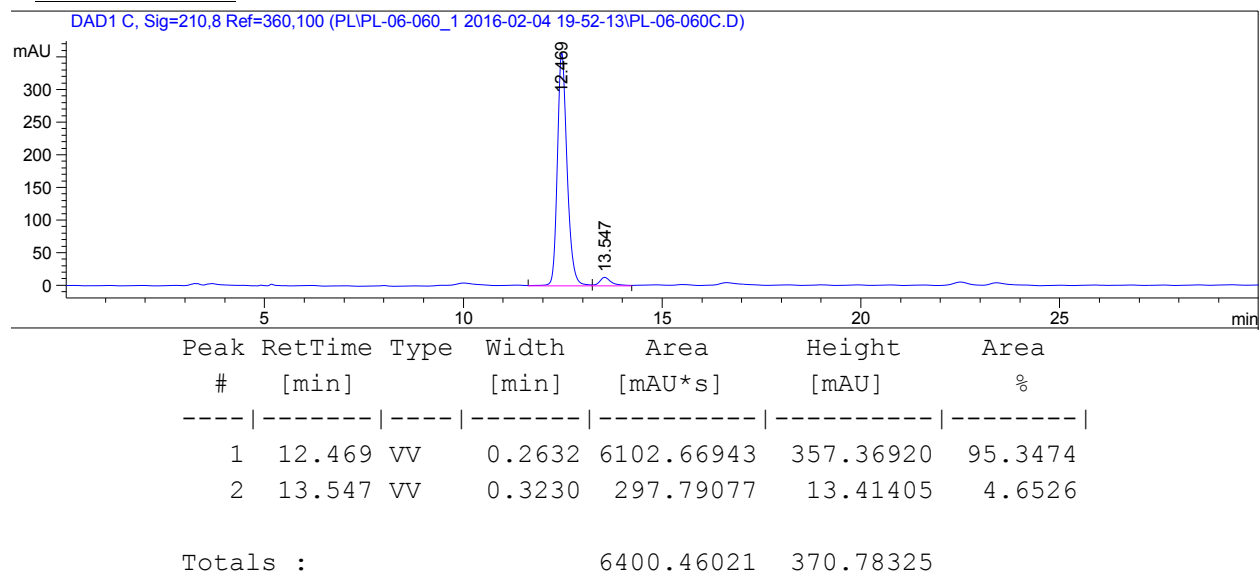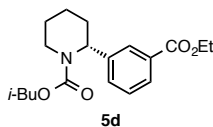

**(R)-Isobutyl 2-(3-(ethoxycarbonyl)phenyl)piperidine-1-carboxylate (5d):** General procedure was followed with pyridine (40 mg, 0.5 mmol), with the following modifications: 3-(ethoxycarbonyl)phenylzinc iodide (0.5 M in THF) was purchased from Sigma-Aldrich. An increased catalyst/ligand loading of 20 mol% Ni(acac)<sub>2</sub> and 24 mol% **L3** was used. The dihydropyridine product was difficult to separate from the biaryl, so the dihydropyridine was reduced to piperidine **5d**, which was readily separated from the biaryl, with H<sub>2</sub> (100 psi) and Pd/C (5 mol%) in MeOH. **5d** (93 mg, 0.28 mmol, 56% yield, 93% ee) was isolated as a clear, colorless oil (run 1). Run 2 provided 47% yield, 93% ee (run 2).

**<sup>1</sup>H NMR (300 MHz, CDCl<sub>3</sub>):** δ 7.97–7.92 (m, 2H), 7.47–7.37 (m, 2H), 5.53 (d, *J* = 3.7 Hz, 1H), 4.40 (q, *J* = 7.1 Hz, 2H), 4.15 (d, *J* = 13.1 Hz, 1H), 3.95 (dd, *J* = 6.6, 2.9 Hz, 2H), 2.84 (ddd, *J* = 13.7, 11.3, 4.1 Hz, 1H), 2.45–2.32 (m, 1H), 2.09–1.86 (m, 2H), 1.76–1.57 (m, 3H), 1.57–1.46 (m, 1H), 1.42 (t, *J* = 7.1 Hz, 3H), 0.93 (d, *J* = 6.7 Hz, 6H) ppm.

**<sup>13</sup>C NMR (125 MHz, CDCl<sub>3</sub>):** δ 166.76, 156.51, 140.76, 131.22, 131.00, 128.77, 127.91, 127.72, 71.79, 61.14, 53.38, 40.50, 28.22, 28.16, 25.45, 19.43, 19.21, 14.47 ppm. (The two diastereotopic Me carbons have the same chemical shift.)

**HRMS:** (ESI-TOF) calculated for C<sub>19</sub>H<sub>28</sub>NO<sub>4</sub> ([M+H]<sup>+</sup>): 334.2013, found: 334.1998.

**FTIR (thin film, cm<sup>-1</sup>):** 2943, 2872, 1719, 1695, 1422, 1259.

**Optical rotation:** [α]<sub>D</sub><sup>26</sup> +80.2 (*c* 1.1, CHCl<sub>3</sub>).

**HPLC:** Chiralcel OD-H, 2.5% IPA in hexanes, 20 min run, 1 mL/min.

**Racemic Standard:**

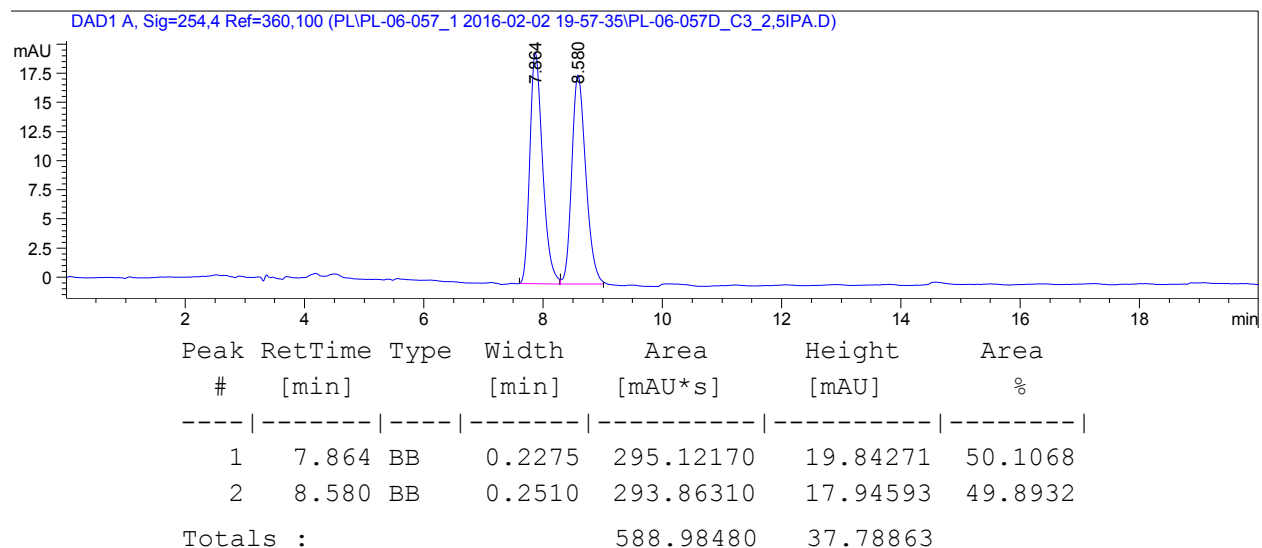

**Enantioenriched:**

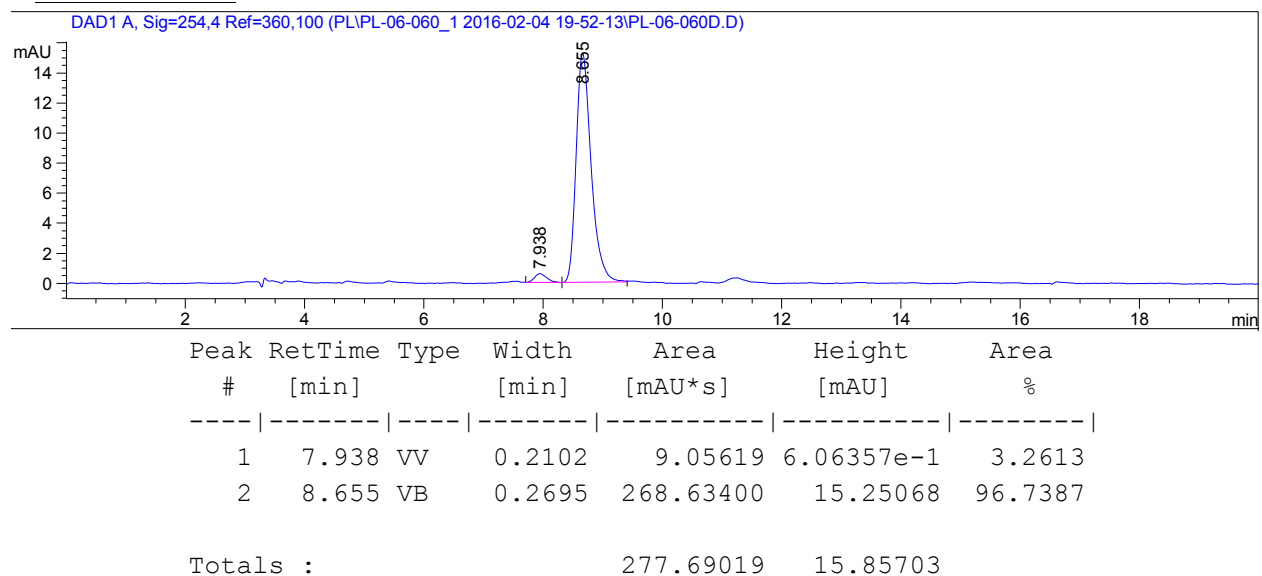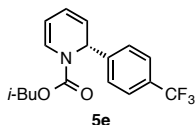

**(R)-Isobutyl 2-(4-(trifluoromethyl)phenyl)pyridine-1(2H)-carboxylate (5e):** General procedure was followed with pyridine (40 mg, 0.50 mmol), providing **5e** (124 mg, 0.38 mmol, 76% yield, 70% ee) as a clear, colorless oil (run 1). Run 2 provided 64% yield, 70% ee.



**<sup>1</sup>H NMR (300 MHz, CDCl<sub>3</sub>):** δ 7.68–7.41 (m, 4H), 6.90 (dd, *J* = 64.7, 7.1 Hz, 1H), 6.07 (dd, *J* = 8.7, 5.9 Hz, 1H), 5.87 (dd, *J* = 41.8, 5.2 Hz, 1H), 5.73–5.56 (m, 1H), 5.29 (q, *J* = 8.4, 6.9 Hz, 1H), 4.07–3.80 (m, 2H), 2.12–1.73 (m, 1H), 1.12–0.47 (m, 6H) ppm.

**<sup>13</sup>C NMR (125 MHz, CDCl<sub>3</sub>):** δ [154.29, 153.81\*], [146.60, 145.12\*], 130.10 (q, *J* = 32.7 Hz), [127.46\*, 126.43], [126.24\*, 125.80], [125.68, 125.39\*], 121.79, [121.59\*, 121.17], [104.89\*, 104.61], 72.74, [56.56, 55.38\*], [28.03\*, 27.92], 19.18, 19.00 ppm. (The CF<sub>3</sub> carbon was unable to be located by conventional <sup>13</sup>C NMR, but a <sup>13</sup>C, <sup>19</sup>F-HMQC experiment showed the CF<sub>3</sub> signal at δ 116.91 ppm.)

**<sup>19</sup>F NMR (282 MHz, CDCl<sub>3</sub>):** δ –62.54 ppm.

**HRMS:** (ESI-TOF) calculated for C<sub>17</sub>H<sub>19</sub>F<sub>3</sub>NO<sub>2</sub> ([M+H]<sup>+</sup>): 326.1362, found: 326.1352.

**FTIR (thin film, cm<sup>-1</sup>):** 1264, 1706, 1324, 1119, 1068.

**Optical rotation:** [α]<sub>D</sub><sup>26</sup> +128.2 (c 1.1, CHCl<sub>3</sub>).

**HPLC:** Chiralpak AD-H, 5% IPA in hexanes, 10 min run, 1 mL/min.

**Racemic Standard:**

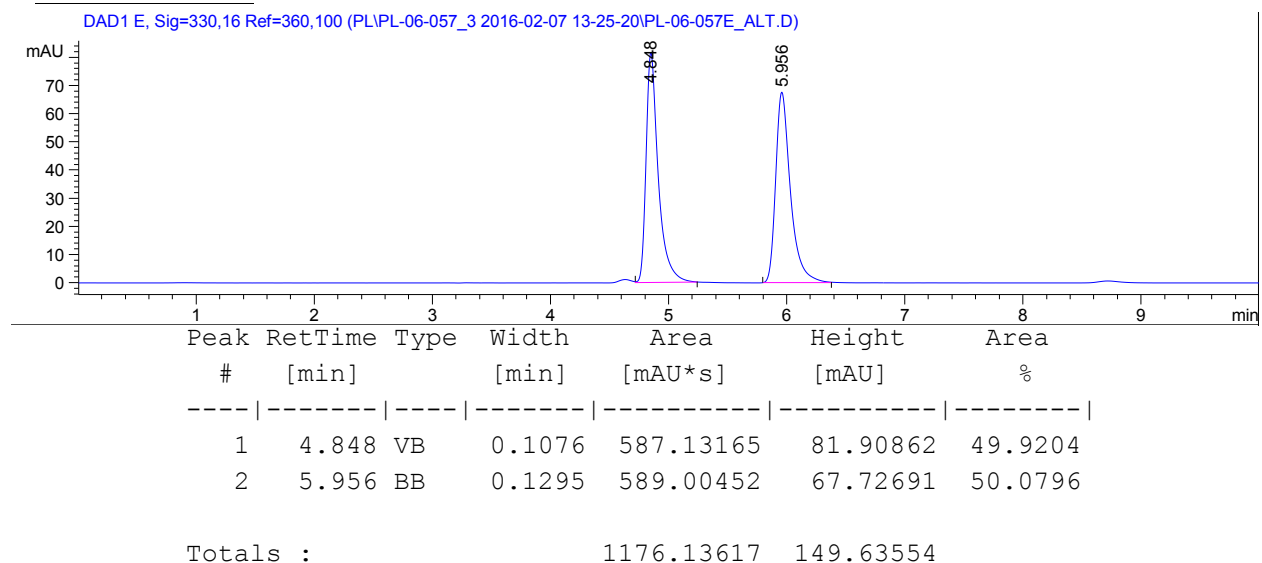

**Enantioenriched:**

DAD1 E, Sig=330,16 Ref=360,100 (PL\PL-06-060\_3 2016-02-08 07-29-03\PL-06-060E\_ALT.D)

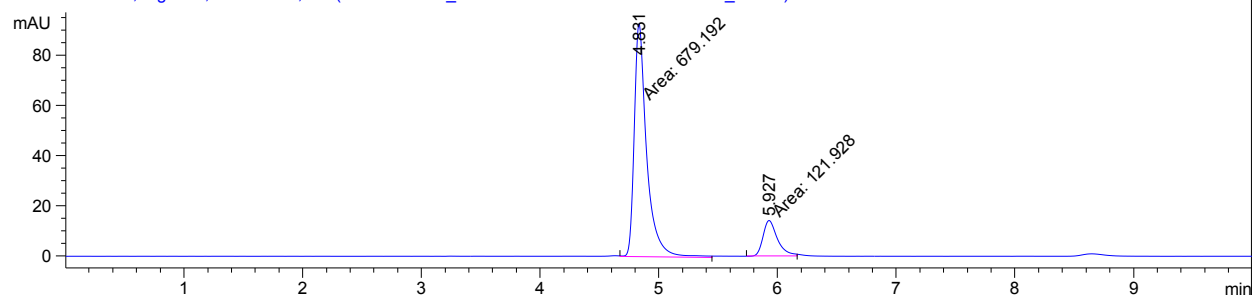

| Peak # | RetTime [min] | Type | Width [min] | Area [mAU*s] | Height [mAU] | Area %  |
|--------|---------------|------|-------------|--------------|--------------|---------|
| 1      | 4.831         | MM   | 0.1217      | 679.19208    | 93.05242     | 84.7803 |
| 2      | 5.927         | MF   | 0.1425      | 121.92812    | 14.26353     | 15.2197 |

Totals : 801.12020 107.31595

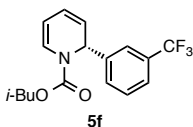

**(R)-Isobutyl 2-(3-(trifluoromethyl)phenyl)pyridine-1(2H)-carboxylate (5f):** General procedure was followed with pyridine (39 mg, 0.50 mmol), providing **5f** (78 mg, 0.24 mmol, 48% yield, 65% ee) as a clear, colorless oil (run 1). Run 2 provided 54% yield, 65% ee.

**<sup>1</sup>H NMR (300 MHz, CDCl<sub>3</sub>):** δ 7.63 (dd, *J* = 19.4, 11.0 Hz, 2H), 7.53 (d, *J* = 7.7 Hz, 1H), 7.44 (t, *J* = 7.7 Hz, 1H), 6.88 (dd, *J* = 61.5, 6.8 Hz, 1H), 6.24–5.99 (m, 1H), 5.87 (dd, *J* = 46.7, 5.4 Hz, 1H), 5.74–5.59 (m, 1H), 5.31 (q, *J* = 7.5, 6.7 Hz, 1H), 4.08–3.74 (m, 2H), 2.13–1.72 (m, 1H), 0.96–0.78 (m, 6H) ppm.

**<sup>13</sup>C NMR (125 MHz, CDCl<sub>3</sub>):** δ [154.18, 153.70\*], [143.41, 142.04\*], 130.84 (q, *J* = 32.2 Hz), [130.60\*, 129.62], [129.26, 129.98\*], [129.21, 125.20\*], 124.69, [123.92\*, 122.88], 121.70, [121.60\*, 121.13], [100.87\*, 104.52], [77.64, 72.58\*], [56.47, 55.10\*], [27.90\*, 27.76], 19.04\*, 19.86 ppm. (The CF<sub>3</sub> carbon was unable to be located by conventional <sup>13</sup>C NMR, but a <sup>13</sup>C,<sup>19</sup>F-HMQC experiment showed the CF<sub>3</sub> signal at δ [112.98, 110.95] ppm.)

**<sup>19</sup>F NMR (282 MHz, CDCl<sub>3</sub>):** δ [–62.53\*, –62.64] ppm.

**HRMS:** (ESI-TOF) calculated for C<sub>17</sub>H<sub>19</sub>F<sub>3</sub>NO<sub>2</sub> ([M+H]<sup>+</sup>): 326.1362, found: 326.1357.

**FTIR (thin film, cm<sup>-1</sup>):** 2966, 1707, 1328, 1165, 1125, 1074.

**Optical rotation:** [α]<sub>D</sub><sup>26</sup> +155.9 (c 1.0, CHCl<sub>3</sub>).

**HPLC:** Regis Whelk-O 1, 5% IPA in hexanes, 15 min run, 1 mL/min.

**Racemic Standard:**

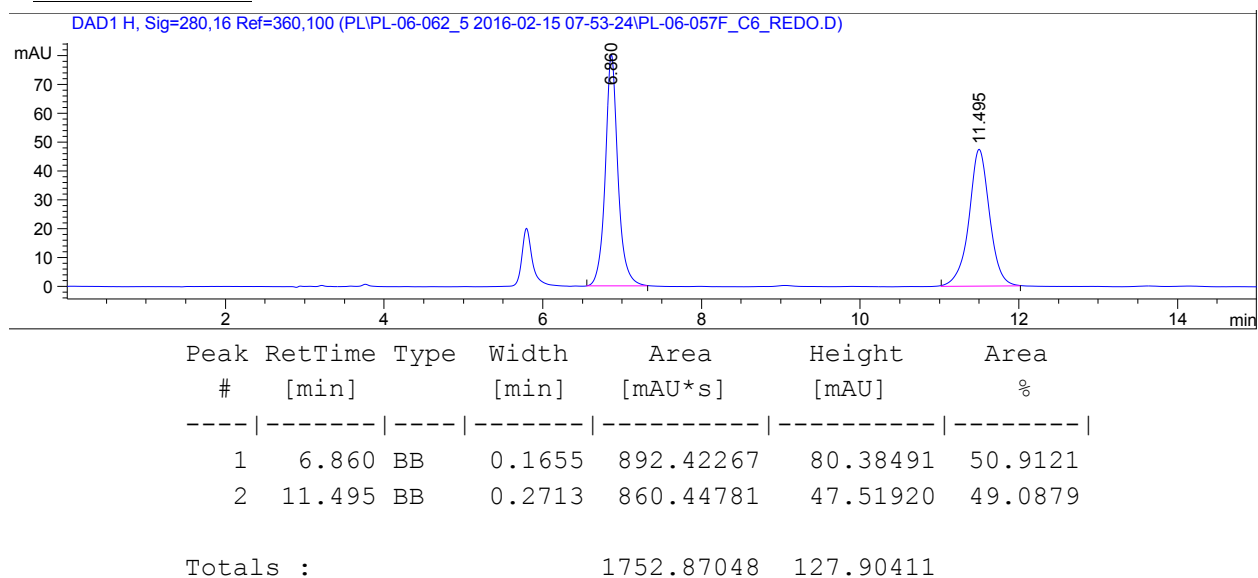

**Enantioenriched:**

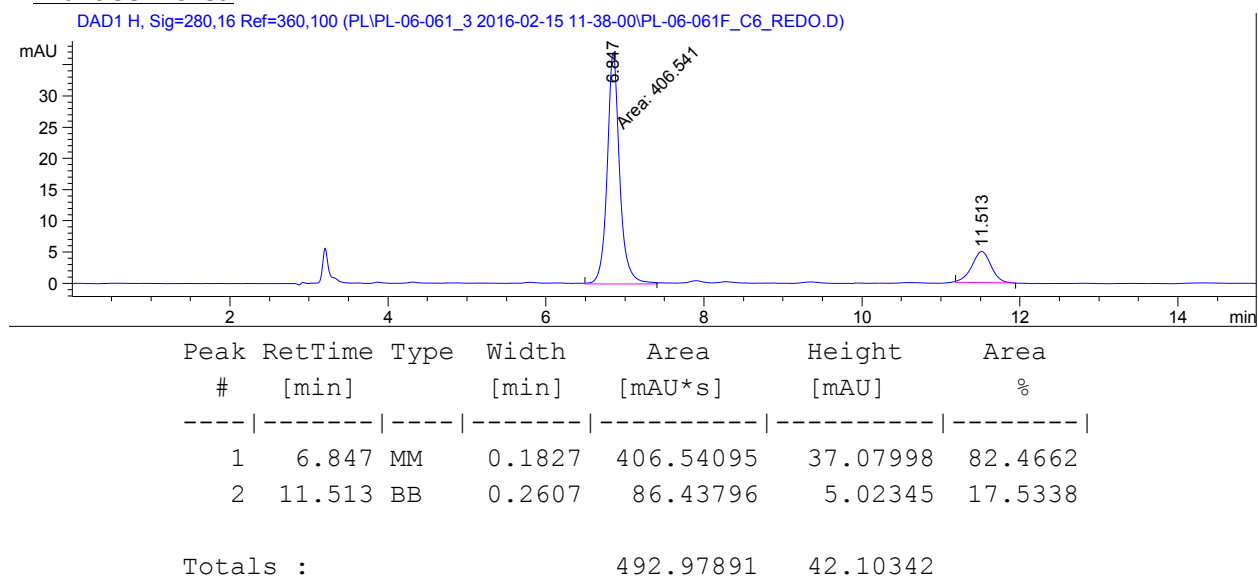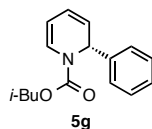

**(R)-Isobutyl 2-phenylpyridine-1(2H)-carboxylate (5g):** General procedure was followed with pyridine (40 mg, 0.50 mmol), with the following modification: an increased catalyst/ligand loading of 20 mol% Ni(acac)<sub>2</sub> and 24 mol% **L3** was used. **5g** (62 mg, 0.24 mmol, 48% yield, 85% ee) was isolated as a clear, colorless oil (run 1). Run 2 provided 61% yield, 86% ee.

**<sup>1</sup>H NMR (300 MHz, CDCl<sub>3</sub>):** δ 7.58–7.27 (m, 5H), 6.88 (dd, *J* = 66.0, 6.3 Hz, 1H), 6.11–5.92 (m, 1H), 5.92–5.73 (m, 1H), 5.73–5.61 (m, 1H), 5.43–5.21 (m, 1H), 4.08–3.71 (m, 2H), 2.17–1.75 (m, 1H), 1.10–0.69 (m, 6H) ppm.

**<sup>13</sup>C NMR (125 MHz, CDCl<sub>3</sub>):** δ [154.61, 153.86\*], [142.82, 141.33\*], [128.73, 128.65\*], [128.00\*, 127.87], [127.26\*, 126.04], [126.39, 125.34\*], [122.80, 122.71\*], [120.94\*, 120.42], [104.95\*, 104.59], [74.08, 72.52\*], [56.98\*, 55.72], [28.04, 27.93], 19.21, [19.08\*, 19.06] ppm.

**HRMS:** (ESI-TOF) calculated for C<sub>16</sub>H<sub>20</sub>NO<sub>2</sub> ([M+H]<sup>+</sup>): 258.1489, found: 258.1472.

**FTIR (thin film, cm<sup>-1</sup>):** 3032, 2962, 2874, 1709, 1322, 1257, 1110.

**Optical rotation:** [α]<sub>D</sub><sup>26</sup> +597.9 (*c* 1.0, CHCl<sub>3</sub>).

**HPLC:** Chiralcel OD-H, 2.5% IPA to hexanes, 20 min run, 1 mL/min.

**Racemic Standard:**

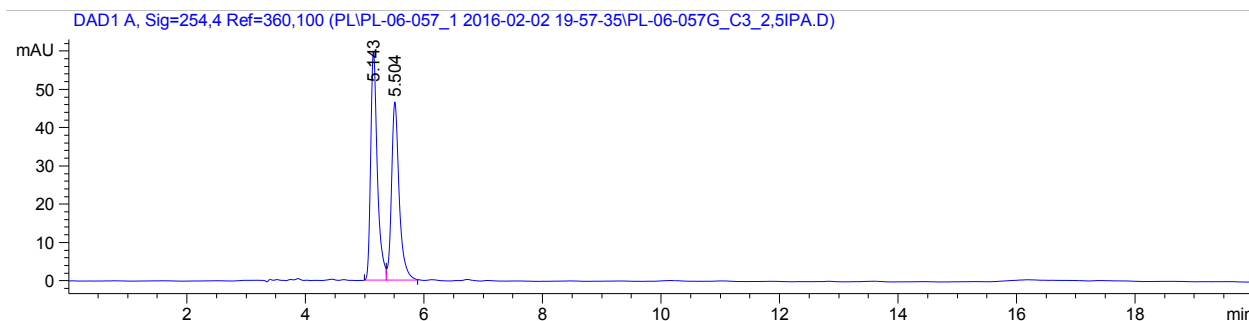

| Peak #   | RetTime [min] | Type | Width [min] | Area [mAU*s] | Height [mAU] | Area %  |
|----------|---------------|------|-------------|--------------|--------------|---------|
| 1        | 5.143         | BV   | 0.1174      | 469.32428    | 59.93162     | 52.7012 |
| 2        | 5.504         | VB   | 0.1354      | 421.21344    | 46.64292     | 47.2988 |
| Totals : |               |      |             | 890.53772    | 106.57454    |         |

## Enantioenriched:

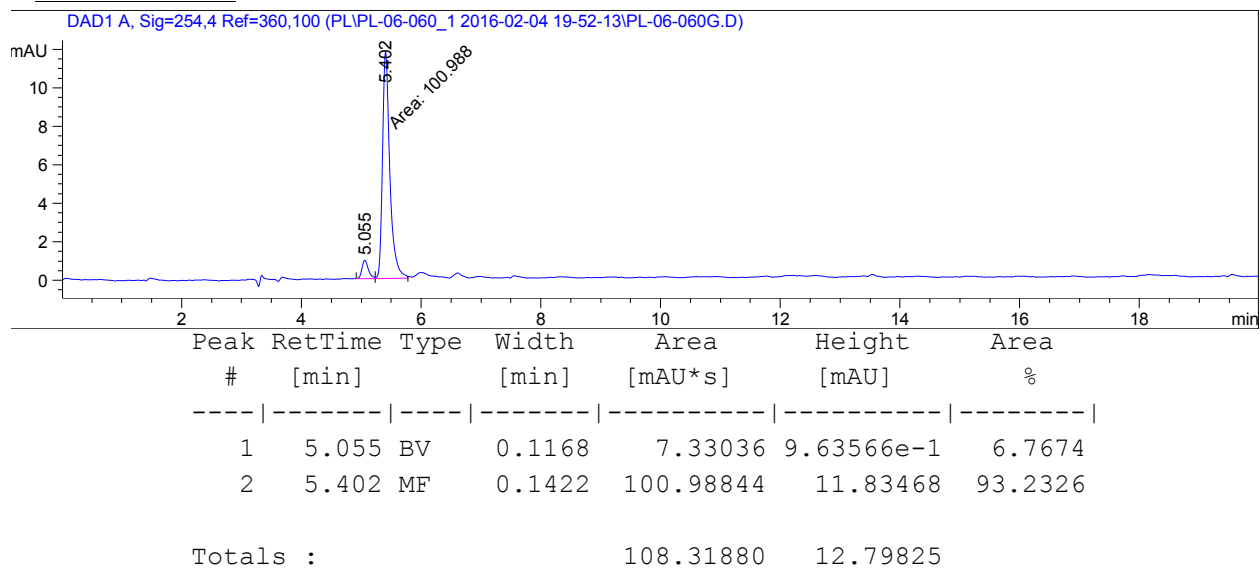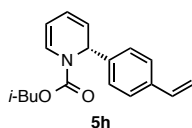

**(R)-Isobutyl 2-(4-vinylphenyl)pyridine-1(2H)-carboxylate (5h):** General procedure was followed with pyridine (42 mg, 0.53 mmol), providing **5h** (90 mg, 0.32 mmol, 60% yield, 85% ee) as a clear, colorless oil (run 1). Run 2 provided 88% yield, 86% ee.

**<sup>1</sup>H NMR (300 MHz, CDCl<sub>3</sub>):**  $\delta$  7.43–7.30 (m, 4H), 6.87 (dd,  $J = 64.4, 7.7$  Hz, 1H), 6.69 (dd,  $J = 17.6, 10.9$  Hz, 1H), 6.15–5.92 (m, 1H), 5.91–5.59 (m, 3H), 5.34–5.25 (m, 1H), 5.22 (d,  $J = 11.3$  Hz, 1H), 4.04–3.82 (m, 2H), 2.02–1.81 (m, 1H), 1.11–0.57 (m, 6H) ppm.

**<sup>13</sup>C NMR (125 MHz, CDCl<sub>3</sub>):**  $\delta$  [140.86, 140.82\*], [136.62\*, 136.55], 131.84, [128.12, 127.92\*], [127.52\*, 126.67], [126.58, 126.53\*], [126.31\*, 125.32], [122.60, 122.52\*], [121.04\*, 120.57], 114.06, [104.93\*, 104.67], [74.09, 72.54\*], [56.65, 55.48\*], [28.03\*, 27.94], 19.21, 19.09 ppm.

**HRMS:** (ESI-TOF) calculated for C<sub>18</sub>H<sub>22</sub>NO<sub>2</sub> ([M+H]<sup>+</sup>): 284.1645, found: 284.1630.

**FTIR (thin film, cm<sup>-1</sup>):** 2962, 1708, 1403, 1383, 1323, 1258, 1114.

**Optical rotation:**  $[\alpha]_D^{26} +1.3$  (c 1.1, CHCl<sub>3</sub>).

**HPLC:** Chiralcel OJ-H, 5% IPA in hexanes, 30 min run, 1 mL/min.

### Racemic Standard:

DAD1 A, Sig=254,4 Ref=360,100 (D:\DATA\PL\PL-03-215 2014-10-03 15-35-32\PL-03-217\_C2.D)

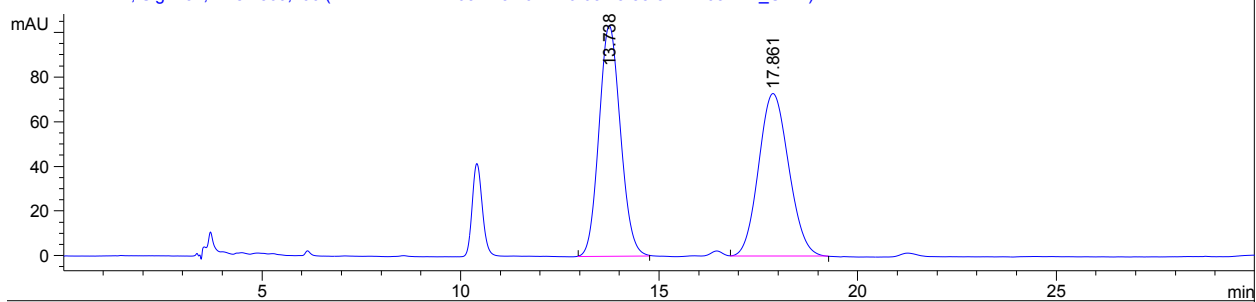

| Peak # | RetTime [min] | Type | Width [min] | Area [mAU*s] | Height [mAU] | Area %  |
|--------|---------------|------|-------------|--------------|--------------|---------|
| 1      | 13.738        | BB   | 0.5817      | 3878.08130   | 103.37643    | 50.1907 |
| 2      | 17.861        | VB   | 0.8117      | 3848.60937   | 72.92225     | 49.8093 |

Totals : 7726.69067 176.29868

### Enantioenriched:

DAD1 A, Sig=254,4 Ref=360,100 (D:\DATA\PL\PL-03-218 2014-10-04 13-22-47\PL-03-219.D)

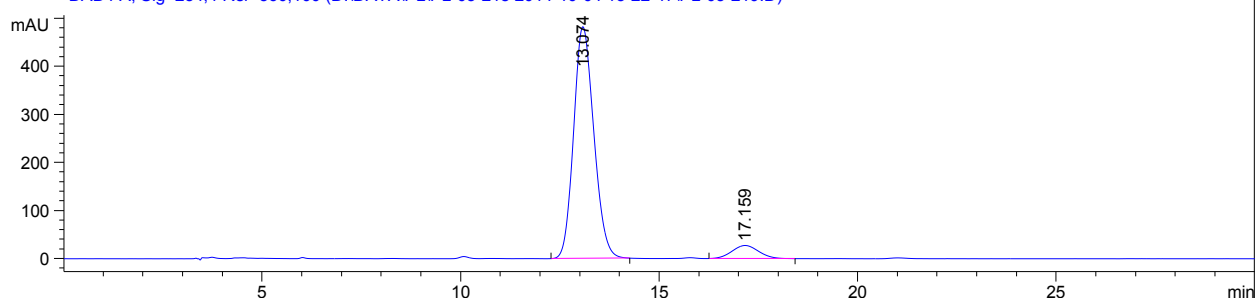

| Peak # | RetTime [min] | Type | Width [min] | Area [mAU*s] | Height [mAU] | Area %  |
|--------|---------------|------|-------------|--------------|--------------|---------|
| 1      | 13.074        | BB   | 0.5470      | 1.70628e4    | 482.03925    | 93.0671 |
| 2      | 17.159        | BB   | 0.7350      | 1271.07141   | 27.21154     | 6.9329  |

Totals : 1.83338e4 509.25078

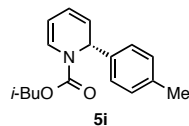

**(R)-Isobutyl 2-(p-tolyl)pyridine-1(2H)-carboxylate (5i):** General procedure was followed with pyridine (41 mg, 0.52 mmol), providing **5i** (85 mg, 0.31 mmol, 60% yield, 76% ee) as a clear, colorless oil (run 1). Run 2 provided 59% yield, 76% ee.

**<sup>1</sup>H NMR (300 MHz, CDCl<sub>3</sub>):** δ 7.35 (d, *J* = 7.6 Hz, 1H), 7.26–7.23 (m, 1H), 7.12 (d, *J* = 7.5 Hz, 2H), 6.85 (dd, *J* = 62.4, 7.4 Hz, 1H), 5.99 (ddd, *J* = 27.2, 9.8, 4.8 Hz, 1H), 5.90–5.57 (m, 2H), 5.37–5.17 (m, 1H), 4.01–3.82 (m, 2H), 2.32 (s, 3H), 2.05–1.80 (m, 1H), 1.00–0.75 (m, 6H) ppm.

**<sup>13</sup>C NMR (125 MHz, CDCl<sub>3</sub>):** δ 139.73, [138.58, 138.40\*], [137.78\*, 137.60], 129.34, [127.30\*, 126.14], [126.32, 125.27\*], [122.95, 122.84\*], [120.83\*, 120.38], [104.94\*, 104.75], [72.52, 72.47\*], [56.56, 56.44\*], [28.03\*, 27.93], 21.30, [19.22\*, 19.15], [19.08\*, 19.07] ppm.

**HRMS:** (ESI-TOF) calculated for C<sub>17</sub>H<sub>22</sub>NO<sub>2</sub> ([M+H]<sup>+</sup>): 272.1645, found: 272.1621.

**FTIR (thin film, cm<sup>-1</sup>):** 2962, 2875, 1710, 1401, 1383, 1322, 1257, 1111.

**Optical rotation:** [α]<sub>D</sub><sup>26</sup> +82.4 (c 1.0, CHCl<sub>3</sub>).

**HPLC:** Chiralcel OJ-H, 5% IPA in hexanes, 15 min run, 1 mL/min.

**Racemic Standard:**

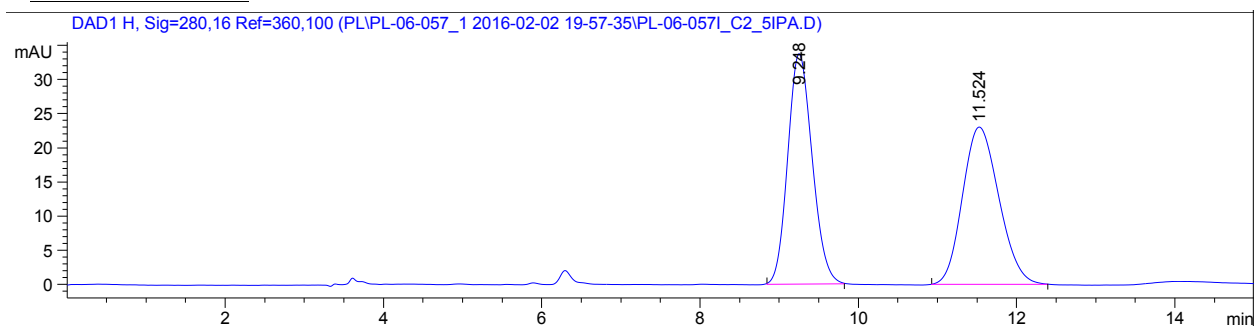

| Peak #   | RetTime [min] | Type | Width [min] | Area [mAU*s] | Height [mAU] | Area %  |
|----------|---------------|------|-------------|--------------|--------------|---------|
| 1        | 9.248         | BB   | 0.3353      | 726.83502    | 33.74718     | 49.5531 |
| 2        | 11.524        | BB   | 0.5043      | 739.94647    | 23.06237     | 50.4469 |
| Totals : |               |      |             | 1466.78149   | 56.80955     |         |

**Enantioenriched:**

DAD1 B, Sig=220,16 Ref=360,100 (D:\DATA\PL\PL-03-249 2014-10-17 15-37-23\PL-03-249.D)

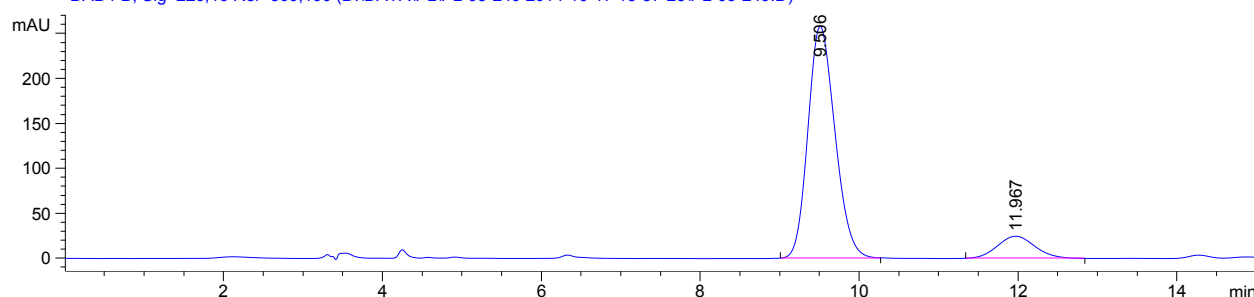

| Peak #   | RetTime [min] | Type | Width [min] | Area [mAU*s] | Height [mAU] | Area %  |
|----------|---------------|------|-------------|--------------|--------------|---------|
| 1        | 9.506         | BB   | 0.3683      | 6108.27930   | 257.92078    | 88.1860 |
| 2        | 11.967        | BB   | 0.5087      | 818.30481    | 24.68896     | 11.8140 |
| Totals : |               |      |             | 6926.58411   | 282.60974    |         |

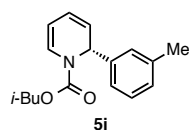

**(R)-Isobutyl 2-(m-tolyl)pyridine-1(2H)-carboxylate (5j):** General procedure was followed with pyridine (40 mg, 0.51 mmol), providing **5j** (42 mg, 0.15 mmol, 30% yield, 95% ee) as a clear, colorless oil (run 1). Run 2 provided 52% yield, 94% ee.

**<sup>1</sup>H NMR (300 MHz, CDCl<sub>3</sub>):** δ 7.25–7.12 (m, 3H), 7.07 (d, *J* = 6.7 Hz, 1H), 6.88 (dd, *J* = 60.8, 7.8 Hz, 1H), 6.11–5.88 (m, 1H), 5.88–5.52 (m, 2H), 5.28 (q, *J* = 6.5, 6.0 Hz, 1H), 4.07–3.82 (m, 2H), 2.33 (s, 3H), 2.08–1.77 (m, 1H), 1.04–0.60 (m, 6H) ppm.

**<sup>13</sup>C NMR (125 MHz, MeOD):** δ [154.65, 153.84\*], [142.76, 141.40\*], [139.81, 138.27\*], [129.28\*, 126.89], [128.78, 128.58\*], [127.80\*, 126.74], [126.38, 125.36\*], [124.21\*, 123.12], 122.88, [120.74\*, 120.31], [104.91\*, 104.58], [74.07, 72.48\*], [56.98, 55.78\*], [28.03, 27.92\*], [21.65\*, 21.45] [19.21\*, 19.04], [19.07, 19.06\*] ppm.

**HRMS:** (ESI-TOF) calculated for C<sub>17</sub>H<sub>22</sub>NO<sub>2</sub> ([M+H]<sup>+</sup>): 272.1645, found: 272.1637.

**FTIR (thin film, cm<sup>-1</sup>):** 2962, 2875, 1711, 1400, 1383, 1320, 1257, 1110.

**Optical rotation:** [α]<sub>D</sub><sup>26</sup> +449.9 (*c* 1.0, CHCl<sub>3</sub>).

**HPLC:** Chiralcel OJ-H, 5% IPA in hexanes, 15 min run, 1 mL/min.



### Racemic Standard:

DAD1 C, Sig=210,8 Ref=360,100 (PL\PL-06-057\_1 2016-02-02 19-57-35\PL-06-057J\_C2\_5IPA.D)

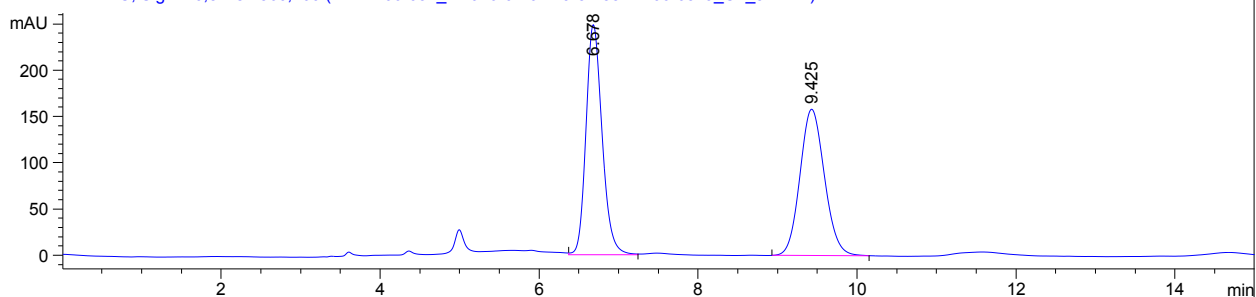

| Peak #   | RetTime [min] | Type | Width [min] | Area [mAU*s] | Height [mAU] | Area %  |
|----------|---------------|------|-------------|--------------|--------------|---------|
| 1        | 6.678         | VB   | 0.2170      | 3522.23853   | 249.02133    | 50.9486 |
| 2        | 9.425         | BB   | 0.3320      | 3391.07520   | 158.24355    | 49.0514 |
| Totals : |               |      |             | 6913.31372   | 407.26488    |         |

### Enantioenriched:

DAD1 A, Sig=254,4 Ref=360,100 (D:\DATA\PL\PL-03-218 2014-10-04 13-22-47\PL-03-218.D)

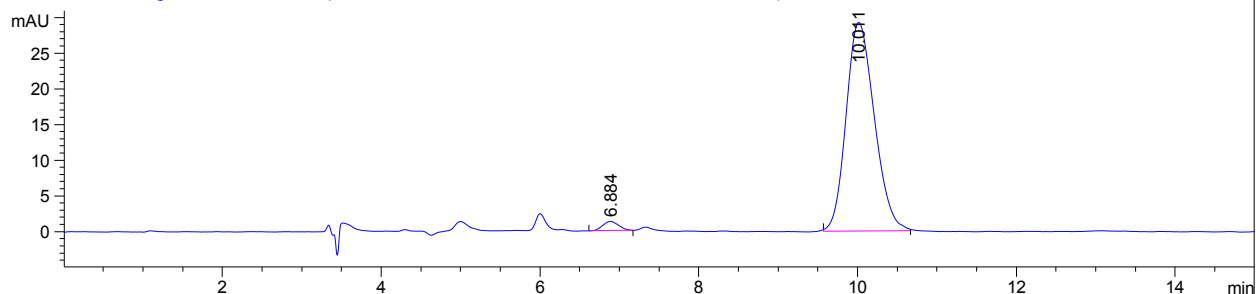

| Peak #   | RetTime [min] | Type | Width [min] | Area [mAU*s] | Height [mAU] | Area %  |
|----------|---------------|------|-------------|--------------|--------------|---------|
| 1        | 6.884         | BV   | 0.2248      | 18.58300     | 1.31533      | 2.5046  |
| 2        | 10.011        | BB   | 0.3847      | 723.35883    | 29.23611     | 97.4954 |
| Totals : |               |      |             | 741.94183    | 30.55144     |         |

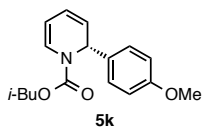

**(R)-Isobutyl 2-(4-methoxyphenyl)pyridine-1(2H)-carboxylate (5k):** General procedure was followed with pyridine (39 mg, 0.49 mmol), providing **5k** (100 mg, 0.35 mmol, 71% yield, 91% ee) as a clear, colorless oil (run 1). Run 2 provided 65% yield, 91% ee.

**<sup>1</sup>H NMR (300 MHz, CDCl<sub>3</sub>):** δ 7.35 (dd, *J* = 30.9, 7.9 Hz, 2H), 6.99–6.65 (m, 3H), 6.28–5.92 (m, 1H), 5.91–5.52 (m, 2H), 5.41–5.16 (m, 1H), 4.00–3.86 (m, 2H), 3.78 (s, 3H), 2.18–1.78 (m, 1H), 1.00–0.75 (m, 6H) ppm.

**<sup>13</sup>C NMR (125 MHz, CDCl<sub>3</sub>):** δ [159.40\*, 159.34], 153.88, [134.84, 133.43\*], [128.90\*, 127.70], [126.19, 125.12\*], [122.99, 122.83\*], [120.86\*, 120.36], [113.95, 113.90\*], [104.93\*, 104.76], [72.52, 72.45\*], [56.15\*, 55.02], 55.38, [28.02, 28.00\*], 19.21 ppm. (The two diastereotopic Me carbons have the same chemical shift.)

**HRMS:** (ESI-TOF) calculated for C<sub>17</sub>H<sub>22</sub>NO<sub>3</sub> ([M+H]<sup>+</sup>): 288.1594, found: 288.1563.

**FTIR (thin film, cm<sup>-1</sup>):** 2960, 2875, 2837, 1704, 1510, 1321, 1245.

**Optical rotation:** [α]<sub>D</sub><sup>26</sup> +402.3 (*c* 1.1, CHCl<sub>3</sub>).

**HPLC:** Chiralcel OJ-H, 5% IPA in hexanes, 20 min run, 1 mL/min.

**Racemic Standard:**

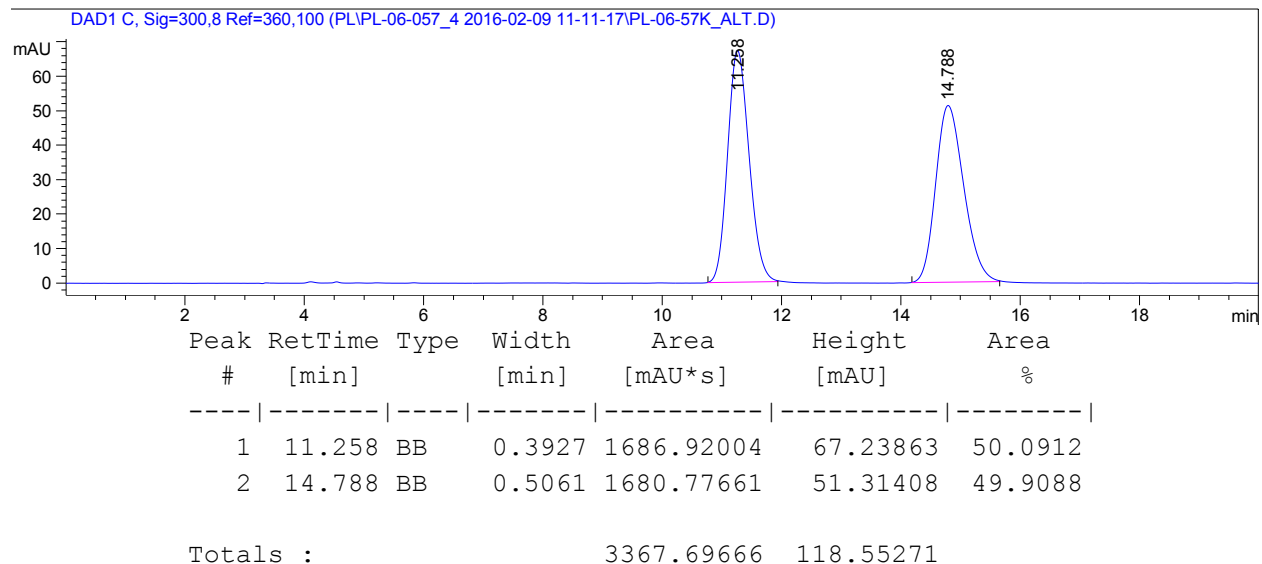

## Enantioenriched:

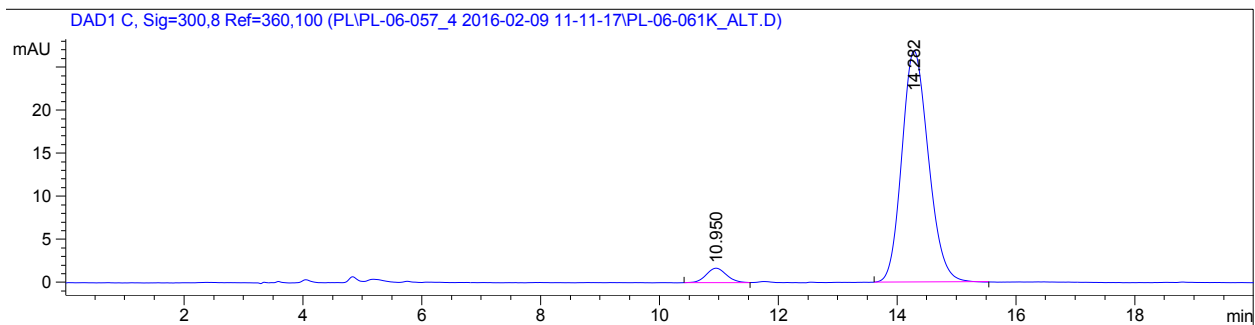

| Peak #   | RetTime [min] | Type | Width [min] | Area [mAU*s] | Height [mAU] | Area %  |
|----------|---------------|------|-------------|--------------|--------------|---------|
| 1        | 10.950        | BV   | 0.3692      | 40.38046     | 1.68747      | 4.6026  |
| 2        | 14.282        | BB   | 0.4793      | 836.95392    | 26.87584     | 95.3974 |
| Totals : |               |      |             | 877.33437    | 28.56331     |         |

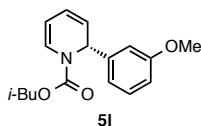

**(R)-Isobutyl 2-(3-methoxyphenyl)pyridine-1(2H)-carboxylate (5I):** General procedure was followed with pyridine (39 mg, 0.49 mmol), providing **5I** (96 mg, 0.34 mmol, 69% yield, 95% ee) as a clear, colorless oil (run 1). Run 2 provided 71% yield, 96% ee.

**<sup>1</sup>H NMR (300 MHz, CDCl<sub>3</sub>):** δ 7.22 (d, *J* = 7.8 Hz, 1H), 7.10–6.86 (m, 2H), 6.79 (t, *J* = 8.7 Hz, 2H), 6.13–5.90 (m, 1H), 5.91–5.57 (m, 2H), 5.36–5.19 (m, 1H), 4.00–3.87 (m, 2H), 3.78 (s, 3H), 2.05–1.77 (m, 1H), 1.11–0.59 (m, 6H) ppm.

**<sup>13</sup>C NMR (125 MHz, CDCl<sub>3</sub>):** δ [159.96, 159.87\*], [154.59, 153.86], [144.44, 143.04\*], [129.74, 129.65\*], [126.41, 125.39\*], [122.68, 122.61\*], [120.96\*, 120.50], [119.44\*, 118.33], [113.23\*, 112.97], [112.86\*, 111.87], [104.94\*, 104.59], [72.63, 72.54\*], [56.92, 55.66\*] 55.33, [28.04\*, 27.95], [19.22\*, 19.19], 19.07 ppm.

**HRMS:** (ESI-TOF) calculated for C<sub>17</sub>H<sub>22</sub>NO<sub>3</sub> ([M+H]<sup>+</sup>): 288.1594, found: 288.1581.

**FTIR (thin film, cm<sup>-1</sup>):** 2961, 2836, 1706, 1315, 1259.

**Optical rotation:** [α]<sub>D</sub><sup>26</sup> +556.0 (*c* 0.95, CHCl<sub>3</sub>).

**HPLC:** Chiralcel OJ-H, 5% IPA in hexanes, 20 min run, 1 mL/min.

### Racemic Standard:

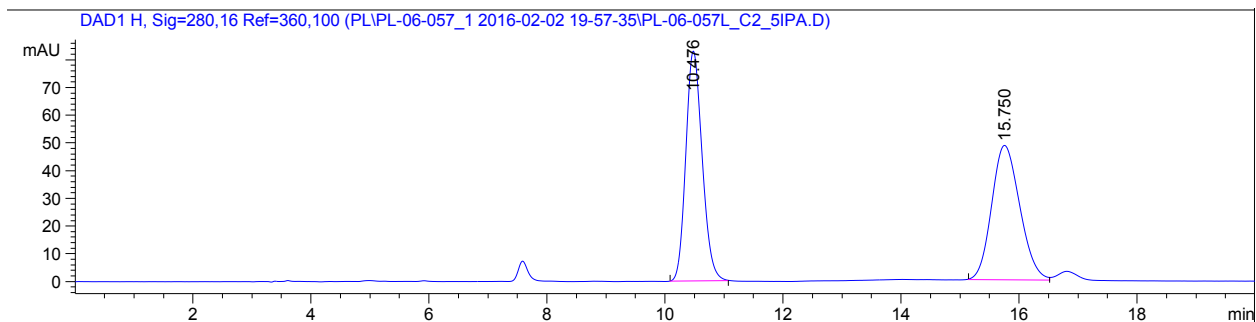

| Peak #   | RetTime [min] | Type | Width [min] | Area [mAU*s] | Height [mAU] | Area %  |
|----------|---------------|------|-------------|--------------|--------------|---------|
| 1        | 10.476        | BB   | 0.2994      | 1604.45691   | 83.02817     | 49.8758 |
| 2        | 15.750        | BV   | 0.5152      | 1612.44568   | 48.57981     | 50.1242 |
| Totals : |               |      |             | 3216.90259   | 131.60798    |         |

### Enantioenriched:

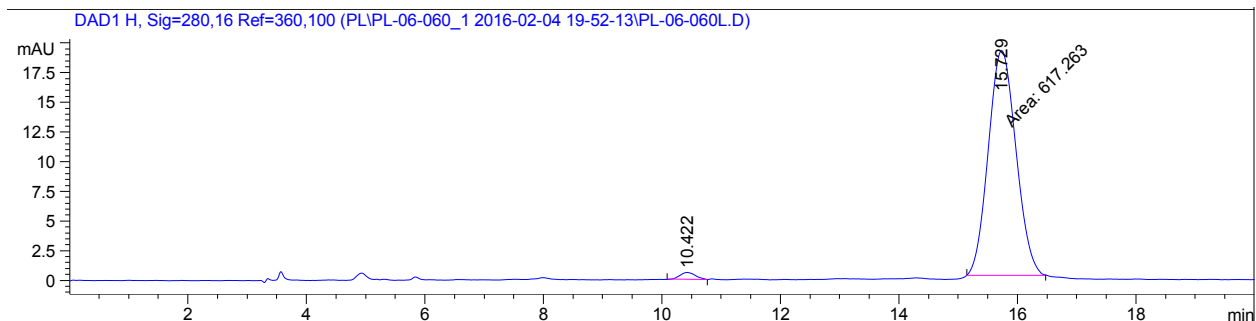

| Peak #   | RetTime [min] | Type | Width [min] | Area [mAU*s] | Height [mAU] | Area %  |
|----------|---------------|------|-------------|--------------|--------------|---------|
| 1        | 10.422        | BV   | 0.2898      | 11.07084     | 5.98464e-1   | 1.7619  |
| 2        | 15.729        | MM   | 0.5423      | 617.26318    | 18.97049     | 98.2381 |
| Totals : |               |      |             | 628.33402    | 19.56895     |         |

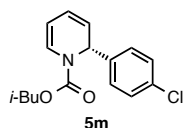

**(R)-Isobutyl 2-(4-chlorophenyl)pyridine-1(2H)-carboxylate (5m):** General procedure was followed with pyridine (39 mg, 0.49 mmol), providing **5m** (79 mg, 0.27 mmol, 55% yield, 80% ee) as a clear, colorless oil (run 1). Run 2 provided 61% yield, 81% ee.

**<sup>1</sup>H NMR (500 MHz, CDCl<sub>3</sub>):** δ 7.50–7.27 (m, 4H), 6.85 (dd, *J* = 109.7, 7.6 Hz, 1H), 6.14–5.91 (m, 1H), 5.79 (dd, *J* = 77.4, 5.2 Hz, 1H), 5.64 (dq, *J* = 11.8, 6.2 Hz, 1H), 5.28 (dt, *J* = 20.0, 6.6 Hz, 1H), 4.00–3.79 (m, 2H), 1.91 (dtd, *J* = 40.2, 12.9, 6.5 Hz, 1H), 0.98–0.75 (m, 6H) ppm.

**<sup>13</sup>C NMR (125 MHz, CDCl<sub>3</sub>):** δ [154.40, 153.81\*], [141.19, 139.66\*], [133.82\*, 133.64], 128.83, [128.78\*, 127.55], [126.29, 125.23\*], [122.23, 122.11\*], [121.35\*, 120.84], [104.90\*, 104.65], 72.62, [56.27, 55.04\*], [28.02\*, 27.95], 19.19, 19.10 ppm.

**HRMS:** (ESI-TOF) calculated for C<sub>16</sub>H<sub>19</sub>ClNO<sub>2</sub> ([M+H]<sup>+</sup>): 292.1099, found: 292.1099.

**FTIR (thin film, cm<sup>-1</sup>):** 2963, 2875, 1708, 1401, 1383, 1323, 1258.

**Optical rotation:** [α]<sub>D</sub><sup>26</sup> +493.5 (*c* 1.2, CHCl<sub>3</sub>).

**HPLC:** Chiralcel OJ-H, 2.5% IPA in hexanes, 15 min run, 1 mL/min.

**Racemic Standard:**

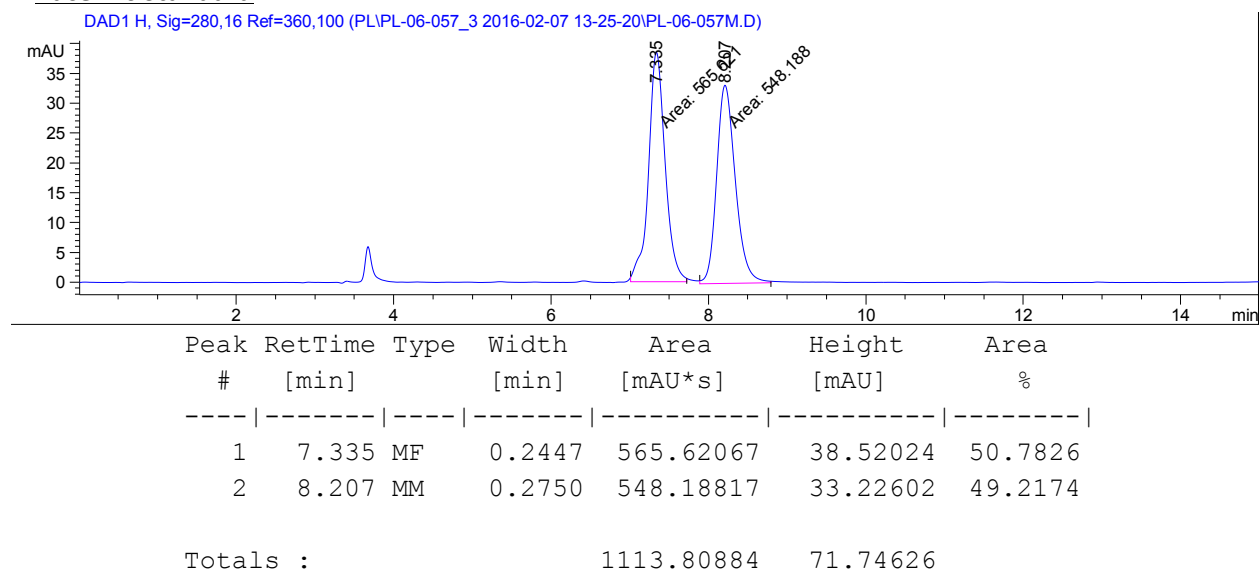

## Enantioenriched:

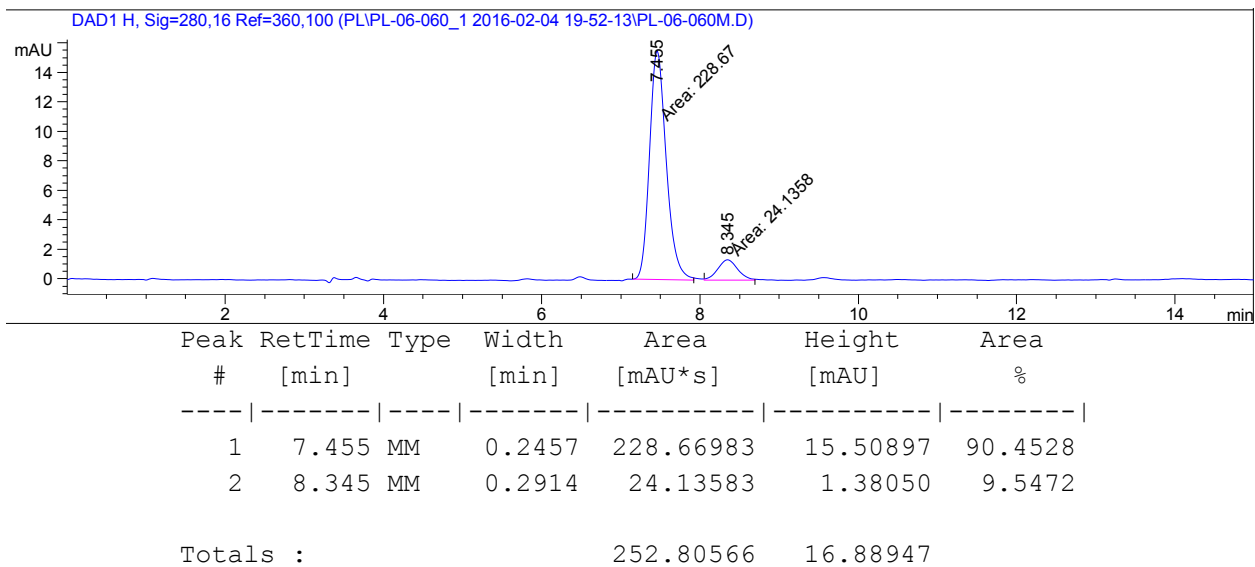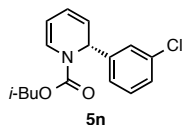

**(R)-Isobutyl 2-(3-chlorophenyl)pyridine-1(2H)-carboxylate (5n):** General procedure was followed with pyridine (39 mg, 0.49 mmol), providing **5n** (115 mg, 0.394 mmol, 80 yield, 94% ee) as a clear, colorless oil (run 1). Run 2 provided 75% yield, 92% ee.

**<sup>1</sup>H NMR (300 MHz, CDCl<sub>3</sub>):**  $\delta$  7.73–7.46 (m, 1H), 7.46–7.29 (m, 2H), 7.24 (m, 1H), 6.87 (dd,  $J$  = 60.4, 6.5 Hz, 1H), 6.02 (ddd,  $J$  = 25.8, 8.7, 6.5 Hz, 1H), 5.91–5.56 (m, 2H), 5.36–5.21 (m, 1H), 3.92 (q,  $J$  = 7.2, 6.3 Hz, 2H), 2.07–1.81 (m, 1H), 1.02–0.62 (m, 6H) ppm.

**<sup>13</sup>C NMR (125 MHz, MeOD):**  $\delta$  [154.32, 153.76\*], [144.58, 143.24\*], 134.50, [130.04, 129.88\*], [128.13, 127.99\*], [127.36\*, 126.36], [126.30, 125.41\*], [125.29\*, 124.25], 121.88, [121.44\*, 121.00], [104.93\*, 104.59], [72.68, 72.63\*], [56.47, 55.21\*], [28.00\*, 27.89], 19.17, 19.02 ppm.

**HRMS:** (ESI-TOF) calculated for C<sub>16</sub>H<sub>19</sub>ClNO<sub>2</sub> ([M+H]<sup>+</sup>): 292.1099, found: 292.1103.

**FTIR (thin film, cm<sup>-1</sup>):** 2961, 1708, 1402, 1383, 1315.

**Optical rotation:**  $[\alpha]_D^{26}$  +264.9 ( $c$  0.97, CHCl<sub>3</sub>).

**HPLC:** Chiralpak AS-H, 1% IPA in hexanes, 10 min run, 1 mL/min.

### Racemic Standard:

DAD1 H, Sig=280,16 Ref=360,100 (PL\PL-06-057\_1 2016-02-02 19-57-35\PL-06-057N\_C4\_1IPA.D)

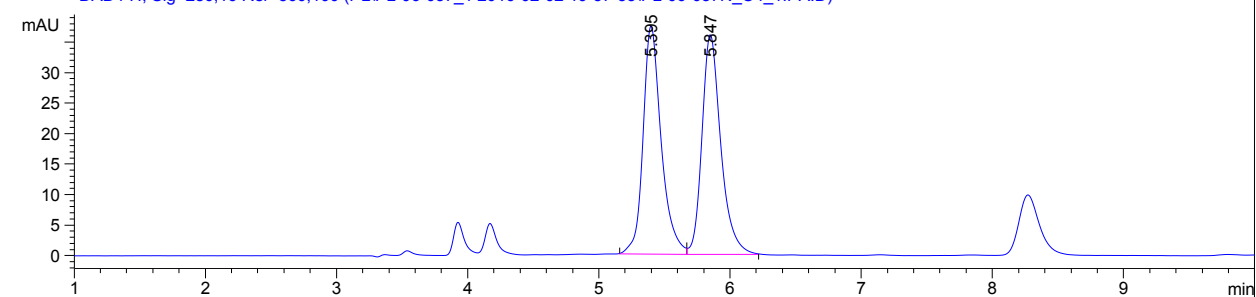

| Peak #   | RetTime [min] | Type | Width [min] | Area [mAU*s] | Height [mAU] | Area %  |
|----------|---------------|------|-------------|--------------|--------------|---------|
| 1        | 5.395         | BV   | 0.1443      | 360.93839    | 37.49607     | 49.9769 |
| 2        | 5.847         | VB   | 0.1509      | 361.27167    | 36.05886     | 50.0231 |
| Totals : |               |      |             | 722.21005    | 73.55493     |         |

### Enantioenriched:

DAD1 H, Sig=280,16 Ref=360,100 (PL\PL-06-062\_1 2016-02-06 12-47-34\PL-06-062N.D)

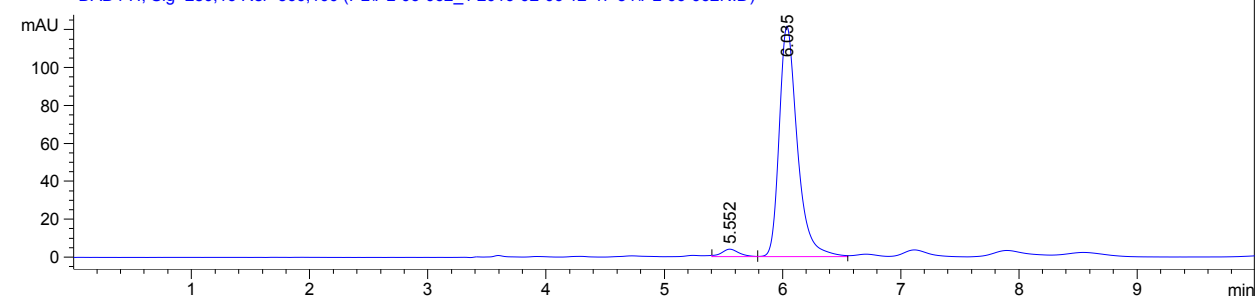

| Peak #   | RetTime [min] | Type | Width [min] | Area [mAU*s] | Height [mAU] | Area %  |
|----------|---------------|------|-------------|--------------|--------------|---------|
| 1        | 5.552         | BV   | 0.1533      | 40.36875     | 3.94809      | 3.0252  |
| 2        | 6.035         | VB   | 0.1623      | 1294.03906   | 121.47241    | 96.9748 |
| Totals : |               |      |             | 1334.40781   | 125.42050    |         |

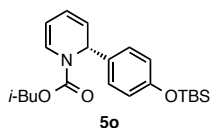

**(R)-Isobutyl 2-(4-((tert-butyldimethylsilyl)oxy)phenyl)pyridine-1(2H)-carboxylate (5o):** General procedure was followed with pyridine (39 mg, 0.50 mmol), with the following modification: following column chromatography, **5o** was further purified on a prep plate (10% EtOAc in hexanes) to the product from biaryl. **5o** (86 mg, 0.22 mmol, 45% yield, 93% ee) was isolated as a clear, colorless oil (run 1). Run 2 provided 52% yield, 94% ee.

**<sup>1</sup>H NMR (300 MHz, CDCl<sub>3</sub>):** δ 7.31 (d, *J* = 6.1 Hz, 1H), 7.22 (d, *J* = 5.5 Hz, 1H), 7.01–6.67 (m, 3H), 6.15–5.86 (m, 1H), 5.86–5.53 (m, 2H), 5.36–5.10 (m, 1H), 4.00–3.82 (m, 2H), 2.01–1.82 (m, 1H), 1.01–0.76 (m, 15H), 0.17 (s, 6H) ppm.

**<sup>13</sup>C NMR (125 MHz, CDCl<sub>3</sub>):** δ [155.52\*, 155.41], 146.87, [135.59, 133.86\*], [128.84\*, 127.55], [126.19, 125.14\*], [123.13, 122.93\*], [120.82, 120.15\*], 119.90, [104.99\*, 104.60], [72.49, 72.43\*], [56.40, 55.01\*], [28.04\*, 27.97], 25.80, 19.21, 19.16, 18.31, –4.27 ppm.

**HRMS:** (ESI-TOF) calculated for C<sub>22</sub>H<sub>34</sub>NO<sub>3</sub>Si ([M+H]<sup>+</sup>): 388.2302, found: 388.2294.

**FTIR (thin film, cm<sup>-1</sup>):** 2961, 1738, 1717, 1508, 1371, 1217.

**Optical rotation:** [α]<sub>D</sub><sup>26</sup> +8.2 (c 1.1, CHCl<sub>3</sub>).

**HPLC:** Chiralpak AS-H, 1% IPA in hexanes, 30 min run, 1 mL/min.

**Racemic Standard:**

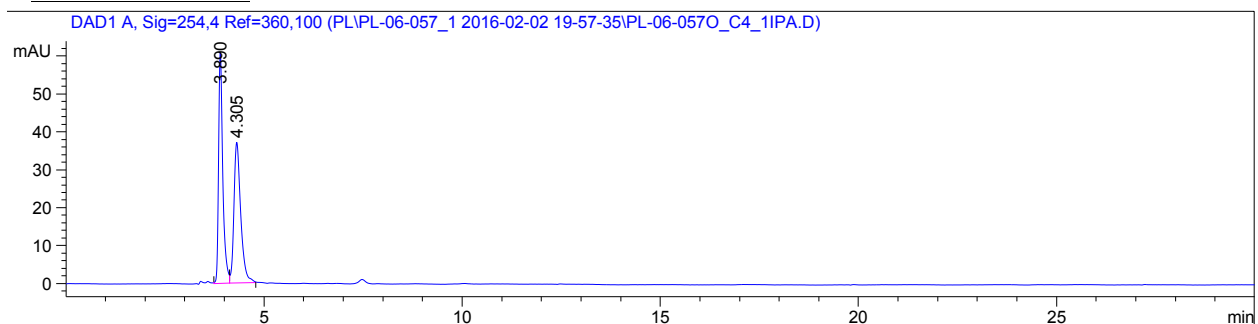

| Peak #   | RetTime [min] | Type | Width [min] | Area [mAU*s] | Height [mAU] | Area %  |
|----------|---------------|------|-------------|--------------|--------------|---------|
| 1        | 3.890         | BV   | 0.1106      | 452.46188    | 60.98144     | 50.5285 |
| 2        | 4.305         | VB   | 0.1792      | 442.99774    | 37.12979     | 49.4715 |
| Totals : |               |      |             | 895.45963    | 98.11123     |         |



**Enantioenriched:**

DAD1 H, Sig=280,16 Ref=360,100 (PL\PL-06-060\_1 2016-02-04 19-52-13\PL-06-060.D)

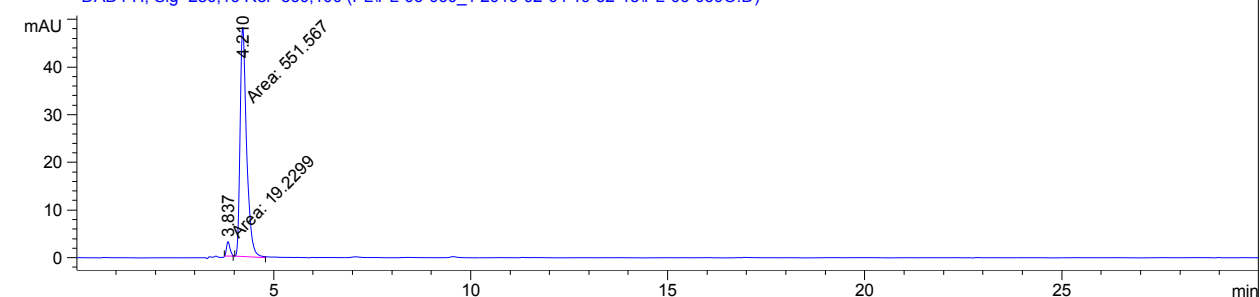

| Peak #   | RetTime [min] | Type | Width [min] | Area [mAU*s] | Height [mAU] | Area %  |
|----------|---------------|------|-------------|--------------|--------------|---------|
| 1        | 3.837         | MM   | 0.1051      | 19.22992     | 3.04859      | 3.3690  |
| 2        | 4.210         | MM   | 0.1908      | 551.56659    | 48.16879     | 96.6310 |
| Totals : |               |      |             | 570.79651    | 51.21738     |         |

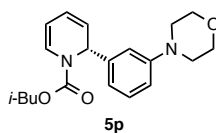

**(R)-Isobutyl 2-(3-morpholinophenyl)pyridine-1(2H)-carboxylate (5p):** General procedure was followed with pyridine (39 mg, 0.49 mmol), providing **5p** (113 mg, 0.330 mmol, 74% yield, 94% ee) as a clear, colorless oil (run 1). Run 2 provided 63% yield, 94% ee.

**<sup>1</sup>H NMR (500 MHz, CDCl<sub>3</sub>):** δ 7.23–7.10 (m, 1H), 7.07–6.62 (m, 4H), 6.10–5.89 (m, 1H), 5.76–5.61 (m, 2H), 5.37–5.21 (m, 1H), 4.03–3.66 (m, 6H), 3.14 (br. s, 4H), 2.02–1.80 (m, 1H), 1.02–0.77 (m, 6H) ppm.

**<sup>13</sup>C NMR (125 MHz, CDCl<sub>3</sub>):** δ [154.63, 153.86\*], [151.75, 151.55\*], [143.99, 142.32\*], [129.50, 129.44\*], [126.43, 125.39\*], [122.96, 122.77\*], [120.93\*, 120.32], [118.96\*, 117.75], 115.12, [114.75\*, 113.25], [104.93\*, 104.55], 72.50, [67.07\*, 66.91], [57.28, 55.95\*], [49.44, 49.38\*], [28.03\*, 27.99], [19.22\*, 19.13], [19.07\*, 19.04] ppm.

**HRMS:** (ESI-TOF) calculated for C<sub>20</sub>H<sub>27</sub>N<sub>2</sub>O<sub>3</sub> ([M+H]<sup>+</sup>): 343.2016, found: 343.2011.

**FTIR (thin film, cm<sup>-1</sup>):** 2961, 1708, 1323, 1255, 1239, 1118.

**Optical rotation:** [α]<sub>D</sub><sup>26</sup> +270.3 (c 0.27, CHCl<sub>3</sub>).

**HPLC:** Chiralpak AS-H, 5% IPA in hexanes, 20 min run, 1 mL/min.

### Racemic Standard:

DAD1 B, Sig=220,16 Ref=360,100 (D:\DATA\PL\PL-04-035 2014-11-12 10-04-23\PL-04-035\_C4.D)

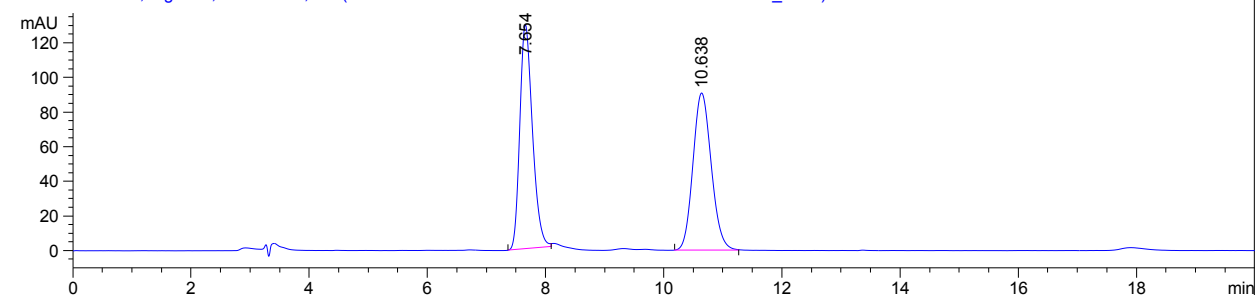

| Peak # | RetTime [min] | Type | Width [min] | Area [mAU*s] | Height [mAU] | Area %  |
|--------|---------------|------|-------------|--------------|--------------|---------|
| 1      | 7.654         | BB   | 0.2273      | 1922.91711   | 129.48032    | 49.5952 |
| 2      | 10.638        | BB   | 0.3351      | 1954.30640   | 90.80654     | 50.4048 |

Totals : 3877.22351 220.28686

### Enantioenriched:

DAD1 B, Sig=220,16 Ref=360,100 (D:\DATA\PL\PL-04-037 2014-11-14 18-09-25\PL-04-037.D)

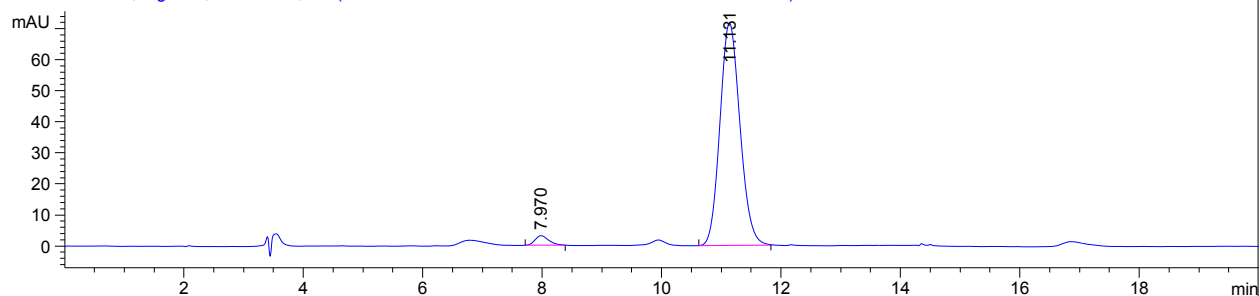

| Peak # | RetTime [min] | Type | Width [min] | Area [mAU*s] | Height [mAU] | Area %  |
|--------|---------------|------|-------------|--------------|--------------|---------|
| 1      | 7.970         | BB   | 0.1962      | 51.47332     | 3.15735      | 2.9863  |
| 2      | 11.131        | BB   | 0.3480      | 1672.18152   | 71.71393     | 97.0137 |

Totals : 1723.65484 74.87127

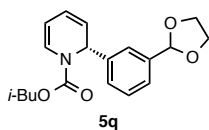

**(R)-Isobutyl 2-(3-(1,3-dioxolan-2-yl)phenyl)pyridine-1(2H)-carboxylate (5q):** General procedure was followed with pyridine (40 mg, 0.51 mmol), with the following modification: 1.3 equiv. *i*-BuOCOCl (0.63 mmol, 81  $\mu$ L) was used instead of 3 equiv. Compound **5q** (99 mg, 0.27 mmol, 53% yield, 92% ee) was isolated as a clear, colorless oil (run 1). Run 2 provided 41% yield, 92% ee.

**<sup>1</sup>H NMR (300 MHz, CDCl<sub>3</sub>):** δ 7.72–7.29 (m, 4H), 6.86 (dd, *J* = 65.4, 9.3 Hz, 1H), 6.17–5.74 (m, 3H), 5.74–5.59 (m, 1H), 5.35–5.06 (m, 1H), 4.20–3.97 (m, 4H), 3.96–3.81 (m, 2H), 2.07–1.74 (m, 1H), 1.07–0.70 (m, 6H) ppm.

**<sup>13</sup>C NMR (125 MHz, CDCl<sub>3</sub>):** δ 153.82, [142.81, 141.38\*], [138.38, 138.24\*], [128.85, 128.74\*], [128.31\*, 127.11], [126.34, 125.34\*], [126.02\*, 125.66], 124.40, [122.62, 122.53\*], [121.16\*, 120.65], [105.00\*, 104.69], [103.83\*, 103.73], [72.59, 72.52\*], [65.45, 65.42\*], [56.85, 55.53\*], [28.02, 27.90], [19.21\*, 19.13], [19.09\*, 19.05] ppm.

**HRMS:** (ESI-TOF) calculated for C<sub>19</sub>H<sub>24</sub>NO<sub>4</sub> ([M+H]<sup>+</sup>): 330.1700, found: 330.1690.

**FTIR (thin film, cm<sup>-1</sup>):** 2961, 2879, 1708, 1322, 1258, 1106.

**Optical rotation:** [α]<sub>D</sub><sup>26</sup> +1015.1 (c 0.56, CHCl<sub>3</sub>).

**HPLC:** Chiralpak AS-H, 5% IPA in hexanes, 20 min run, 1 mL/min.

**Racemic Standard:**

DAD1 H, Sig=280,16 Ref=360,100 (PL\PL-06-057\_2 2016-02-04 14-14-45\PL-06-057Q\_C4\_5IPA.D)

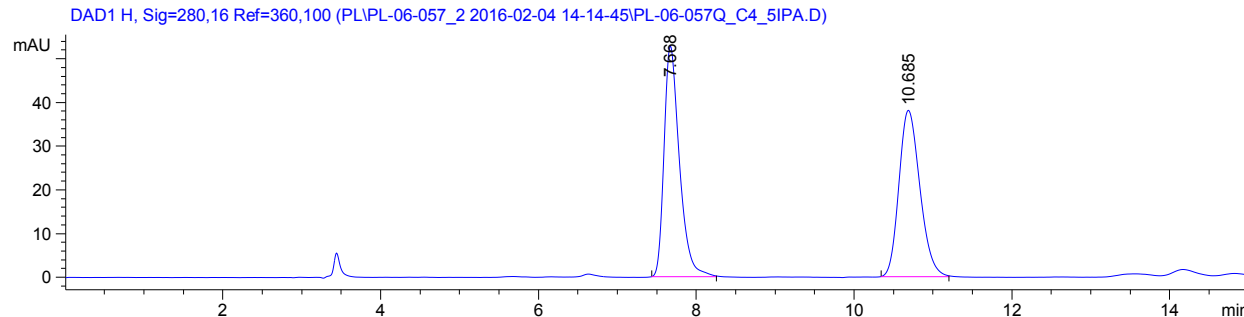

| Peak #   | RetTime [min] | Type | Width [min] | Area [mAU*s] | Height [mAU] | Area %  |
|----------|---------------|------|-------------|--------------|--------------|---------|
| 1        | 7.668         | BB   | 0.2061      | 716.23511    | 52.85177     | 50.4087 |
| 2        | 10.685        | BB   | 0.2857      | 704.62024    | 38.10961     | 49.5913 |
| Totals : |               |      |             | 1420.85535   | 90.96138     |         |

## Enantioenriched:

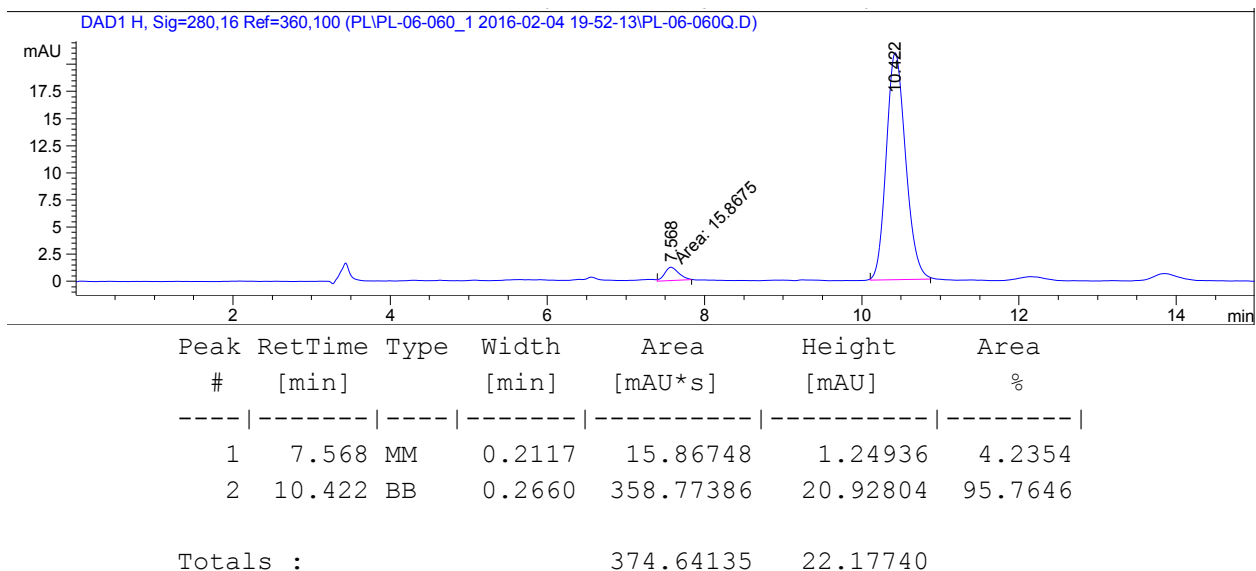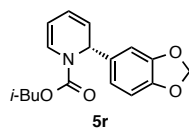

**(R)-Isobutyl 2-(benzo[d][1,3]dioxol-5-yl)pyridine-1(2H)-carboxylate (5r):** General procedure was followed with pyridine (40 mg, 0.51 mmol), providing **5r** (75 mg, 0.25 mmol, 49% yield, 94% ee) as a clear, colorless oil (run 1). Run 2 provided 55% yield, 94% ee.

**<sup>1</sup>H NMR (300 MHz, CDCl<sub>3</sub>):**  $\delta$  7.04–6.88 (m, 2H), 6.74 (d,  $J$  = 7.8 Hz, 2H), 6.10–5.95 (m, 1H), 5.92 (s, 2H), 5.87–5.56 (m, 2H), 5.34–5.17 (m, 1H), 4.03–3.77 (m, 2H), 2.05–1.83 (m, 1H), 1.03–0.73 (m, 6H) ppm.

**<sup>13</sup>C NMR (125 MHz, CDCl<sub>3</sub>):**  $\delta$  [154.56, 153.87\*], [147.95, 147.87\*], [147.35\*, 147.27], [136.65, 135.30\*], [126.24, 125.19\*], [122.82, 122.73\*], [120.92\*, 120.52], 119.65, [108.20\*, 108.11], 107.14, [104.89\*, 104.69], 101.14, [72.59, 72.53\*], [56.53, 55.40\*], [28.02\*, 28.00], 19.21, 19.15 ppm.

**HRMS:** (ESI-TOF) calculated for C<sub>17</sub>H<sub>20</sub>NO<sub>4</sub> ([M+H]<sup>+</sup>): 302.1387, found: 302.1372.

**FTIR (thin film, cm<sup>-1</sup>):** 2962, 2896, 1707, 1488, 1325, 1250, 1236, 1039.

**Optical rotation:**  $[\alpha]_D^{26}$  +499.0 ( $c$  0.65, CHCl<sub>3</sub>).

**HPLC:** Chiralcel OJ-H, 5% IPA in hexanes, 15 min run, 1 mL/min.

### Racemic Standard:

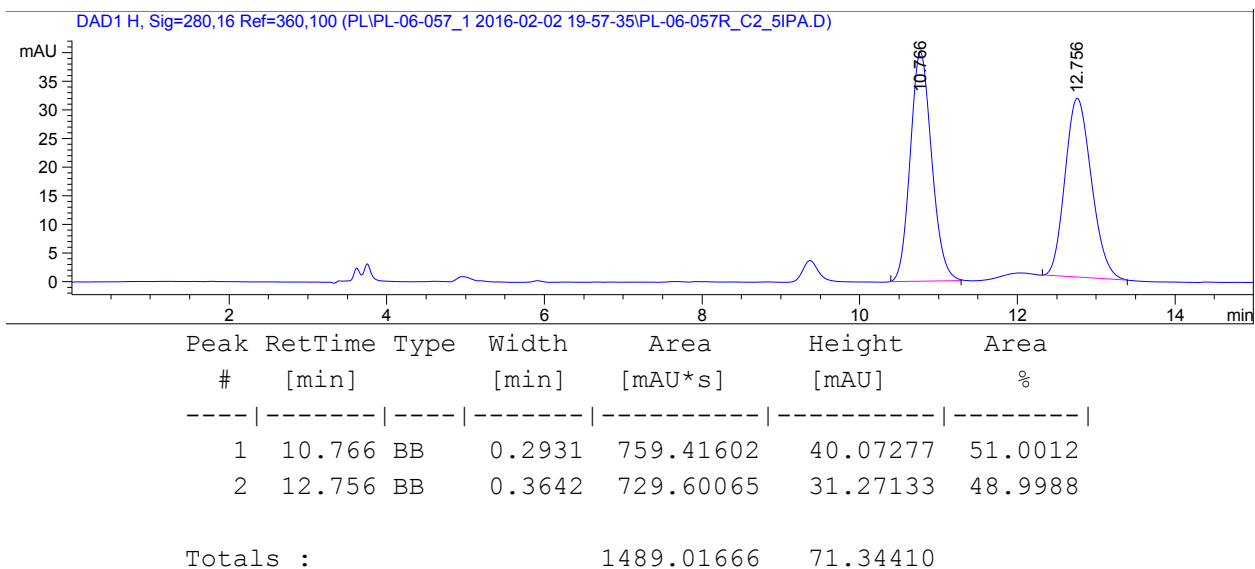

### Enantioenriched:

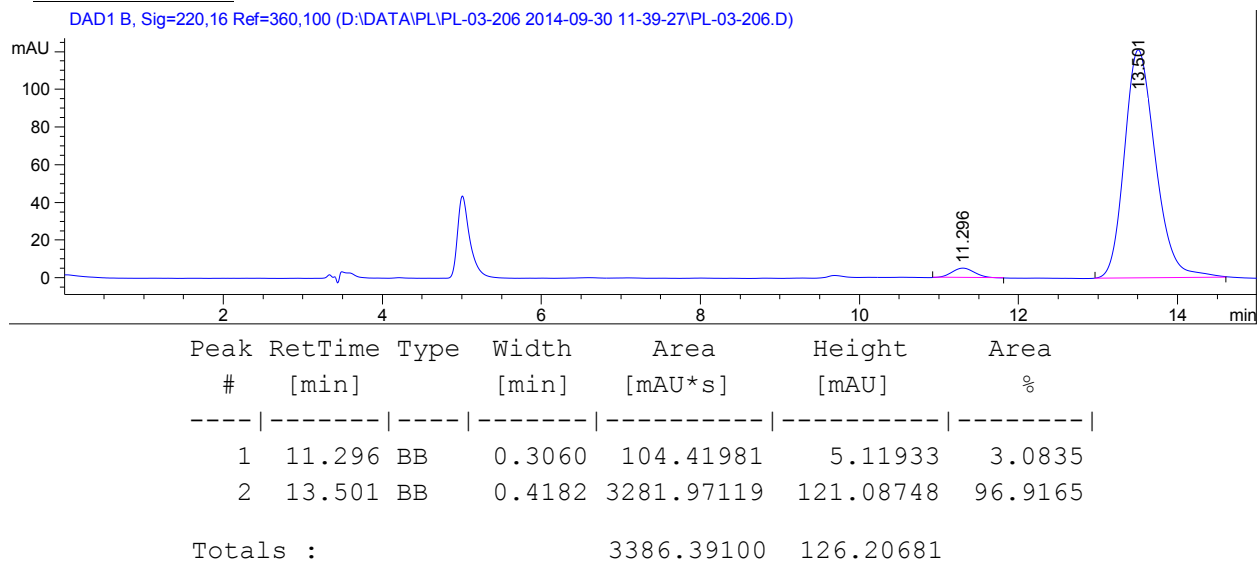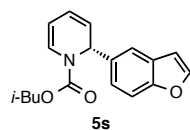

**(R)-isobutyl 2-(benzofuran-5-yl)pyridine-1(2H)-carboxylate (5s):** General procedure was followed with pyridine (40 mg, 0.50 mmol), with the following modification: an increased catalyst/ligand loading of 20 mol% Ni(acac)<sub>2</sub> and 24 mol% **L3** was used. **5s** (79 mg, 0.27 mmol, 53% yield, 89% ee) was isolated as a clear, colorless oil (run 1). Run 2 provided 60% yield, 89% ee.

**<sup>1</sup>H NMR (300 MHz, CDCl<sub>3</sub>):** δ 7.65 (d, *J* = 28.0 Hz, 2H), 7.53–7.28 (m, 2H), 7.08–6.69 (m, 2H), 6.16–5.80 (m, 2H), 5.76–5.65 (m, 1H), 5.43–5.22 (m, 1H), 4.09–3.84 (m, 2H), 2.04–1.81 (m, 1H), 1.07–0.72 (m, 6H) ppm.

**<sup>13</sup>C NMR (125 MHz, CDCl<sub>3</sub>):** δ [154.76, 154.64], 153.91, [145.56, 145.41\*], [137.61, 136.04\*], [127.67, 127.56\*], [126.32, 125.23\*], [124.09\*, 122.83], [123.28, 123.16\*], [120.80, 120.25\*], 118.90, 111.47, [106.94\*, 106.79], [104.92\*, 104.65], [72.55, 72.50\*], [56.94, 55.77\*], [28.02\*, 27.96] 19.21, 19.11 ppm.

**HRMS:** (ESI-TOF) calculated for C<sub>18</sub>H<sub>20</sub>NO<sub>3</sub> ([M+H]<sup>+</sup>): 298.1438, found: 298.1433.

**FTIR (thin film, cm<sup>-1</sup>):** 2962, 2874, 1706, 1324, 1259, 1109.

**Optical rotation:** [α]<sub>D</sub><sup>26</sup> +587.4 (c 1.2, CHCl<sub>3</sub>).

**HPLC:** Chiralpak AS-H, 5% IPA in hexanes, 15 min run, 1 mL/min.

**Racemic Standard:**

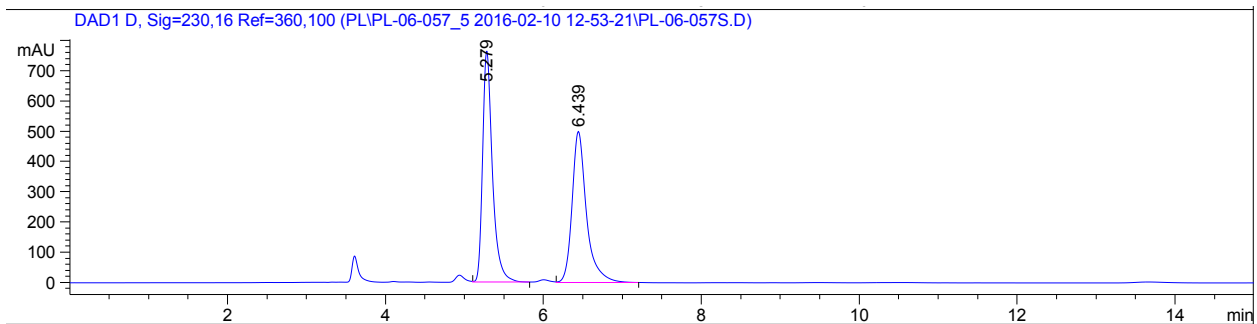

| Peak #   | RetTime [min] | Type | Width [min] | Area [mAU*s] | Height [mAU] | Area %  |
|----------|---------------|------|-------------|--------------|--------------|---------|
| 1        | 5.279         | VB   | 0.1296      | 6660.96436   | 765.11633    | 51.2374 |
| 2        | 6.439         | VB   | 0.1882      | 6339.22510   | 499.19629    | 48.7626 |
| Totals : |               |      |             | 1.30002e4    | 1264.31262   |         |

## Enantioenriched:

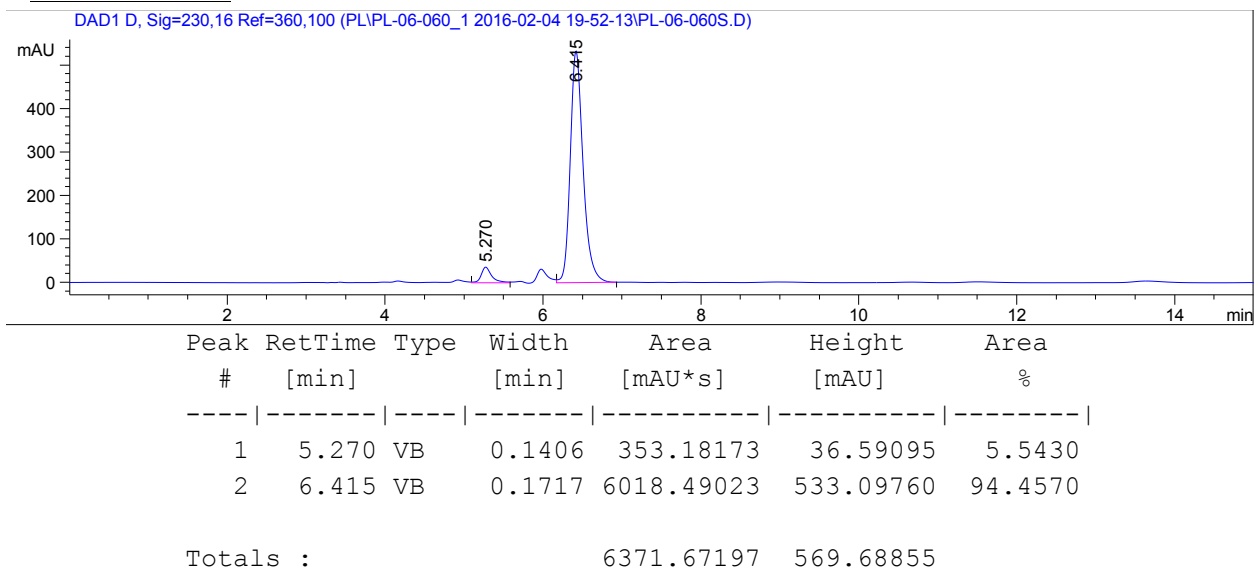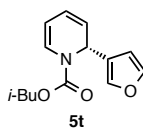

**(R)-isobutyl 2-(furan-3-yl)pyridine-1(2H)-carboxylate (5t):** General procedure was followed with pyridine (42 mg, 0.53 mmol), with the following modification: an increased catalyst/ligand loading of 20 mol% Ni(acac)<sub>2</sub> and 24 mol% **L3** was used. **5t** (64 mg, 0.26 mmol, 49% yield, 96% ee) was isolated as a clear, colorless oil (run 1). Run 2 provided 64% yield, 95% ee.

**<sup>1</sup>H NMR (300 MHz, CDCl<sub>3</sub>):** δ 7.43–7.30 (m, 2H), 6.86–6.58 (m, 1H), 6.46–6.33 (m, 1H), 6.05 (dd, *J* = 9.4, 5.5 Hz, 1H), 5.91–5.72 (m, 1H), 5.66 (dd, *J* = 9.7, 5.4 Hz, 1H), 5.41–5.23 (m, 1H), 3.97 (t, *J* = 7.7 Hz, 2H), 2.08–1.84 (m, 1H), 0.95 (d, *J* = 6.7 Hz, 6H) ppm.

**<sup>13</sup>C NMR (125 MHz, CDCl<sub>3</sub>):** δ 153.71, [143.37, 143.20\*], [141.11\*, 140.18], [125.67, 124.73\*], 124.82, [122.05, 121.89\*], [120.95\*, 120.86], [110.25\*, 109.63], [105.70, 105.33\*], [72.60, 72.51\*], [47.81, 47.11\*], 28.02, 19.26, [19.22\*, 19.08] ppm.

**HRMS:** (ESI-TOF) calculated for C<sub>14</sub>H<sub>18</sub>NO<sub>3</sub> ([M+H]<sup>+</sup>): 248.1281, found: 248.1270.

**FTIR (thin film, cm<sup>-1</sup>):** 2962, 2876, 1706, 1326, 1257, 1110, 1014.

**Optical rotation:** [α]<sub>D</sub><sup>26</sup> +404.3 (*c* 1.1, CHCl<sub>3</sub>).

**HPLC:** Chiralcel OJ-H, 2.5% IPA in hexanes, 10 min run, 1 mL/min.

### Racemic Standard:

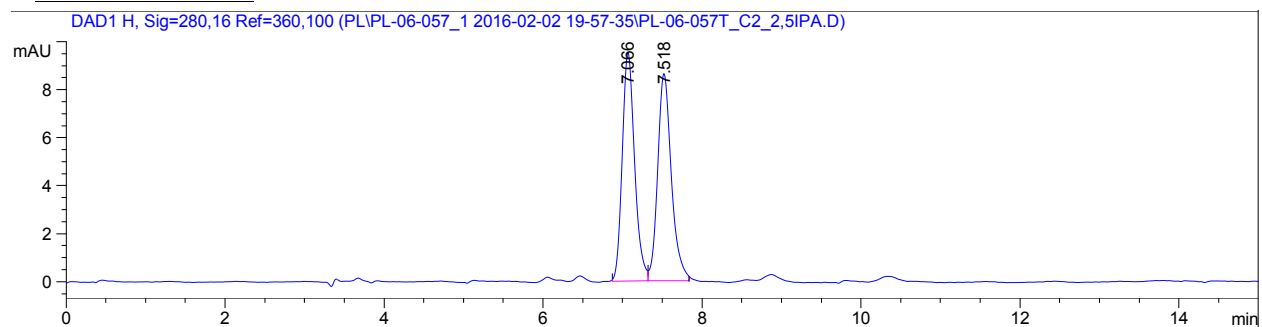

| Peak #   | RetTime [min] | Type | Width [min] | Area [mAU*s] | Height [mAU] | Area %  |
|----------|---------------|------|-------------|--------------|--------------|---------|
| 1        | 7.066         | BV   | 0.1661      | 103.04958    | 9.53345      | 49.8869 |
| 2        | 7.518         | VB   | 0.1817      | 103.51673    | 8.64455      | 50.1131 |
| Totals : |               |      |             | 206.56631    | 18.17800     |         |

### Enantioenriched:

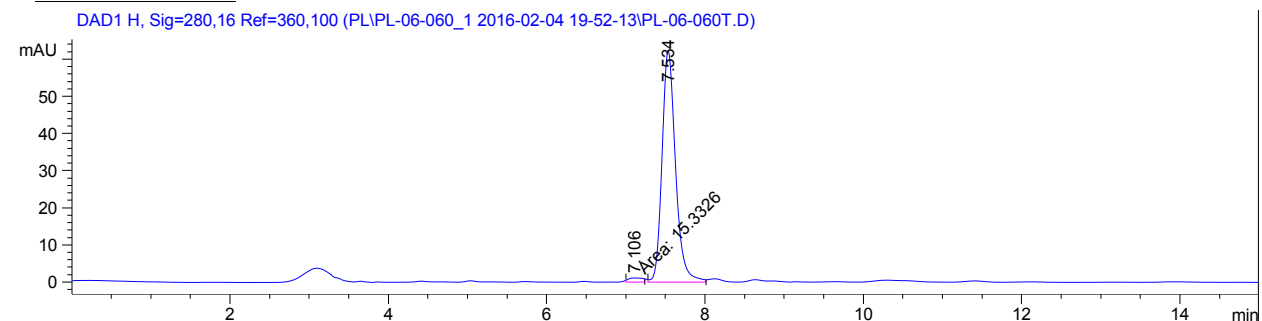

| Peak #   | RetTime [min] | Type | Width [min] | Area [mAU*s] | Height [mAU] | Area %  |
|----------|---------------|------|-------------|--------------|--------------|---------|
| 1        | 7.106         | MF   | 0.2142      | 15.33261     | 1.19317      | 2.0267  |
| 2        | 7.534         | VV   | 0.1870      | 741.19159    | 62.20142     | 97.9733 |
| Totals : |               |      |             | 756.52419    | 63.39459     |         |

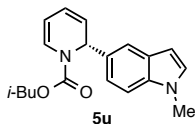

**(R)-Isobutyl 2-(1-methyl-1H-indol-5-yl)pyridine-1(2H)-carboxylate (5u):** General procedure was followed with pyridine (40 mg, 0.50 mmol), providing **5u** (68 mg, 0.22 mmol, 43% yield, 90% ee) as a clear, colorless oil (run 1). Run 2 provided 49% yield, 90% ee.



**<sup>1</sup>H NMR (300 MHz, CDCl<sub>3</sub>):** δ 7.77–7.59 (m, 1H), 7.58–7.35 (m, 1H), 7.11–6.99 (m, 1H), 6.99–6.69 (m, 1H), 6.59–6.37 (m, 1H), 6.19–5.80 (m, 2H), 5.80–5.65 (m, 1H), 5.41–5.19 (m, 1H), 4.17–3.81 (m, 2H), 3.76 (s, 3H), 2.04–1.83 (m, 1H), 1.00–0.71 (m, 6H) ppm.

**<sup>13</sup>C NMR (125 MHz, CDCl<sub>3</sub>):** δ [154.83, 153.92\*], [136.55\*, 136.48], 133.75, 132.33, [129.34, 129.29\*], [126.26, 125.16\*], [123.79, 123.62\*], 121.63, [120.42\*, 119.88], [120.06\*, 118.76], [109.36, 109.24\*], [104.97\*, 104.79], [101.41\*, 101.23], [72.46, 72.33\*], [57.20, 56.09\*], 33.00, [28.00\*, 27.97], 19.23, 19.17 ppm.

**HRMS:** (ESI-TOF) calculated for C<sub>19</sub>H<sub>23</sub>N<sub>2</sub>O<sub>2</sub> ([M+H]<sup>+</sup>): 311.1754, found: 311.1738.

**FTIR (thin film, cm<sup>-1</sup>):** 2960, 1703, 1320, 1252, 1108.

**Optical rotation:** [α]<sub>D</sub><sup>26</sup> +529.0 (c 1.1, CHCl<sub>3</sub>).

**HPLC:** Chiralpak AD-H, 2.5% IPA in hexanes, 20 min run, 1 mL/min.

**Racemic Standard:**

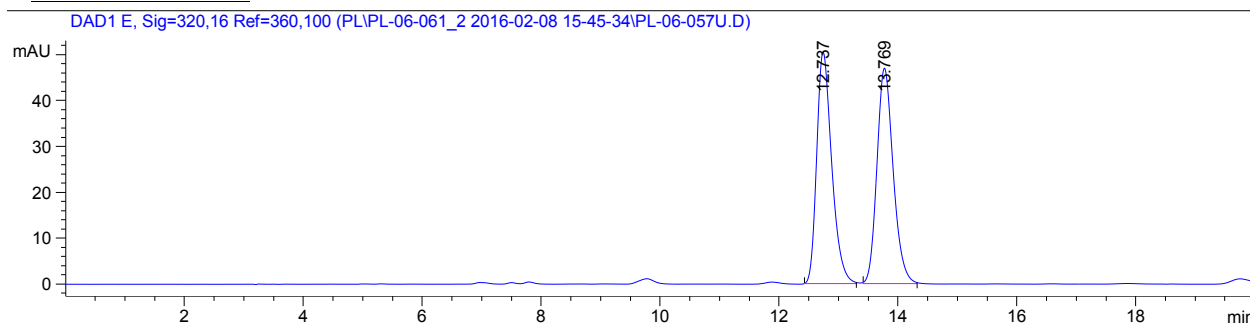

| Peak #   | RetTime [min] | Type | Width [min] | Area [mAU*s] | Height [mAU] | Area %  |
|----------|---------------|------|-------------|--------------|--------------|---------|
| 1        | 12.737        | BB   | 0.2690      | 887.98657    | 50.54144     | 49.8844 |
| 2        | 13.769        | BB   | 0.2915      | 892.10291    | 46.98204     | 50.1156 |
| Totals : |               |      |             | 1780.08948   | 97.52348     |         |

## Enantioenriched:

DAD1 E, Sig=320,16 Ref=360,100 (PL\PL-06-061\_2 2016-02-08 15-45-34\PL-06-061U\_20MIN.D)

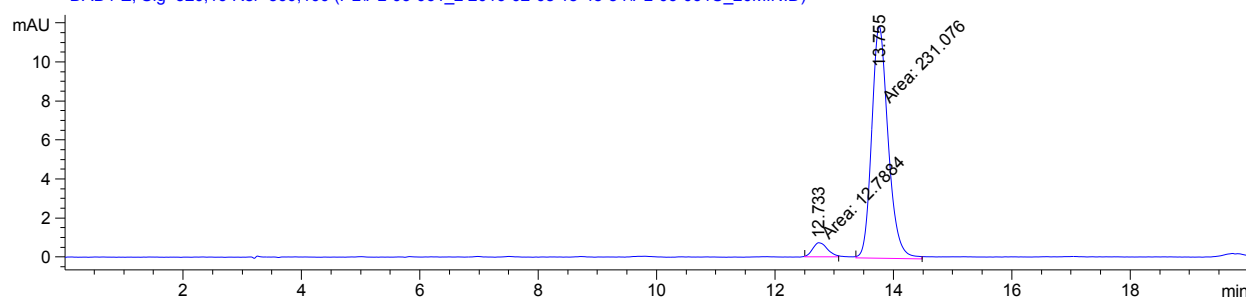

| Peak #   | RetTime [min] | Type | Width [min] | Area [mAU*s] | Height [mAU] | Area %  |
|----------|---------------|------|-------------|--------------|--------------|---------|
| 1        | 12.733        | MF   | 0.2919      | 12.78836     | 7.30267e-1   | 5.2440  |
| 2        | 13.755        | MM   | 0.3234      | 231.07634    | 11.90786     | 94.7560 |
| Totals : |               |      |             | 243.86470    | 12.63813     |         |

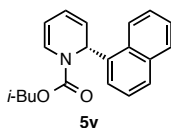

**(R)-Isobutyl 2-(naphthalen-1-yl)pyridine-1(2H)-carboxylate (5v):** General procedure was followed with pyridine (39 mg, 0.50 mmol) with the following modification: an increased catalyst/ligand loading of 20 mol% Ni(acac)<sub>2</sub> and 24 mol% **L3** was used. **5v** (38 mg, 0.12 mmol, 25% yield, 37% ee) was isolated as a clear, colorless oil (run 1). Run 2 provided 17% yield, 37% ee.

**<sup>1</sup>H NMR (300 MHz, CDCl<sub>3</sub>):** δ 8.38–7.99 (m, 1H), 7.86 (d, *J* = 8.7 Hz, 1H), 7.77 (d, *J* = 8.2 Hz, 1H), 7.63 (d, *J* = 7.2 Hz, 1H), 7.58–7.31 (m, 3H), 7.24–6.96 (m, 1H), 6.61 (d, *J* = 20.2 Hz, 1H), 5.82 (br. s, 2H), 5.33–5.22 (m, 1H), 4.03–3.63 (m, 2H), 2.21–1.38 (m, 1H), 1.10–0.78 (m, 4H), 0.50–0.35 (m, 2H) ppm.

**<sup>13</sup>C NMR (125 MHz, CDCl<sub>3</sub>):** δ [154.73, 153.75], [140.18\*, 138.94], 134.01, 133.87, [129.03\*, 128.94], [128.35, 128.07\*], [126.72, 125.97], 126.50, 126.15, [125.89, 125.71\*], [123.42, 122.66], [123.22, 122.44\*], 122.93, 119.82, [103.92, 103.25\*], [72.56, 72.45\*], [54.45\*, 53.80], [28.04, 27.63], 19.21, 18.51 ppm.

**HRMS:** (ESI-TOF) calculated for C<sub>20</sub>H<sub>22</sub>NO<sub>2</sub> ([M+H]<sup>+</sup>): 308.1645, found: 308.1616.

**FTIR (thin film, cm<sup>-1</sup>):** 2944, 2871, 1694, 1414, 1237.

**Optical rotation:** [α]<sub>D</sub><sup>26</sup> -109.1 (c 0.35, CHCl<sub>3</sub>).

**HPLC:** Chiralpak AS-H, 5% IPA in hexanes, 10 min run, 1 mL/min.

### Racemic Standard:

DAD1 C, Sig=210,8 Ref=360,100 (D:\DATA\PL\PL-03-258 2014-10-21 08-55-00\PL-03-358\_C3.D)

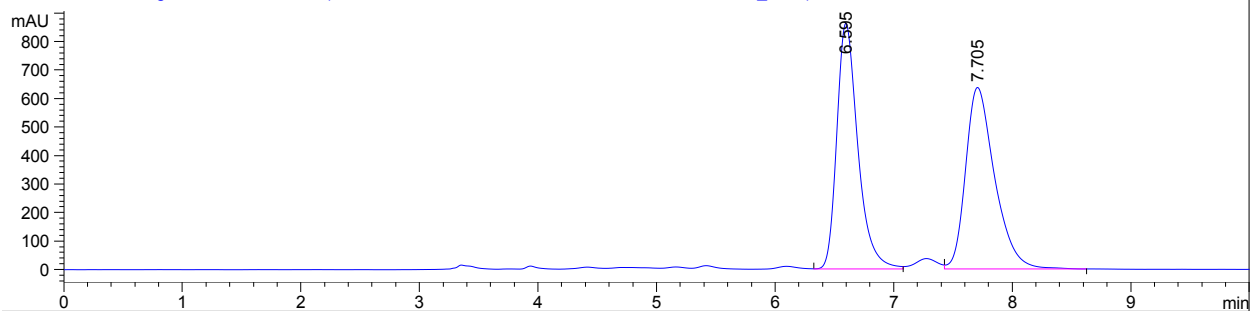

| Peak # | RetTime [min] | Type | Width [min] | Area [mAU*s] | Height [mAU] | Area %  |
|--------|---------------|------|-------------|--------------|--------------|---------|
| 1      | 6.595         | VV   | 0.1885      | 1.06864e4    | 863.02271    | 49.4787 |
| 2      | 7.705         | VB   | 0.2576      | 1.09115e4    | 637.87769    | 50.5213 |

Totals : 2.15979e4 1500.90039

### Enantioenriched:

DAD1 C, Sig=210,8 Ref=360,100 (D:\DATA\PL\PL-03-277 2014-10-25 14-13-11\PL-03-277.D)

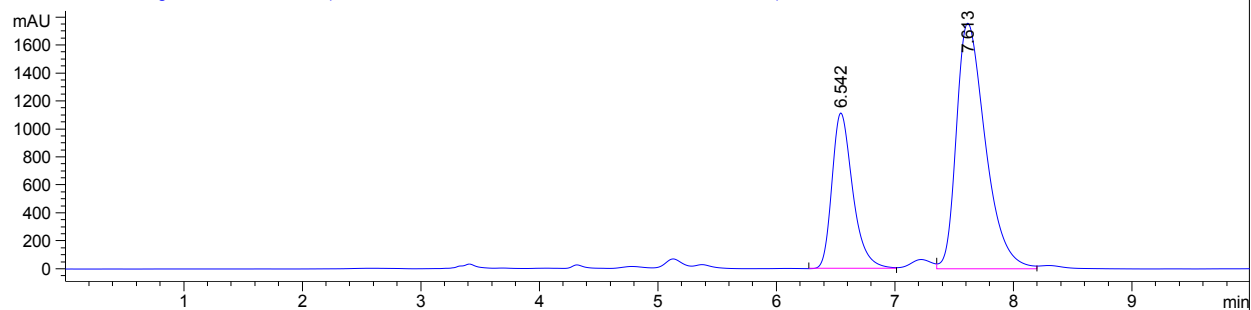

| Peak # | RetTime [min] | Type | Width [min] | Area [mAU*s] | Height [mAU] | Area %  |
|--------|---------------|------|-------------|--------------|--------------|---------|
| 1      | 6.542         | VV   | 0.1864      | 1.35907e4    | 1113.33264   | 31.2826 |
| 2      | 7.613         | VV   | 0.2604      | 2.98543e4    | 1755.84302   | 68.7174 |

Totals : 4.34450e4 2869.17566

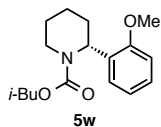

**(R)-Isobutyl 2-(2-methoxyphenyl)piperidine-1-carboxylate (5w):** General procedure was followed with pyridine (40 mg, 0.50 mmol), with the following modifications: an increased catalyst/ligand loading of 20 mol% Ni(acac)<sub>2</sub> and 24 mol% **L3** was used. The dihydropyridine product was found to be difficult to

separate from the biaryl, so the dihydropyridine was reduced to piperidine **5w**, which was readily separated from the biaryl, with H<sub>2</sub> (100 psi) and Pd/C (5 mol%) in MeOH. **5w** (64 mg, 0.22 mmol, 43% yield, 74% ee) was isolated as a clear, colorless oil (run 1). Run 2 provided 39% yield, 74% ee.

**<sup>1</sup>H NMR (300 MHz, CDCl<sub>3</sub>):** δ 7.23–7.08 (m, 2H), 6.93–6.81 (m, 2H), 5.49 (dd, *J* = 6.0, 3.6 Hz, 1H), 4.31–4.14 (m, 1H), 3.87–3.71 (m, 4H), 3.48 (q, *J* = 7.1 Hz, 1H), 3.36–3.24 (m, 1H), 2.14–1.97 (m, 1H), 1.96–1.82 (m, 1H), 1.81–1.67 (m, 2H), 1.47–1.34 (m, 2H), 1.21 (app. t, *J* = 7.0 Hz, 1H), 0.75 (app. t, *J* = 6.8 Hz, 6H) ppm.

**<sup>13</sup>C NMR (125 MHz, CDCl<sub>3</sub>):** δ 156.75, 156.59, 131.62, 127.59, 126.58, 120.23, 110.64, 71.40, 55.36, 50.86, 41.88, 28.82, 28.09, 24.85, 19.15, 18.99, 18.94 ppm.

**HRMS:** (ESI-TOF) calculated for C<sub>17</sub>H<sub>26</sub>NO<sub>3</sub> ([M+H]<sup>+</sup>): 292.1907, found: 292.1873.

**FTIR (thin film, cm<sup>-1</sup>):** 2937, 2869, 1695, 1414, 1237.

**Optical rotation:** [α]<sub>D</sub><sup>26</sup> -29.1 (*c* 1.1, CHCl<sub>3</sub>).

**HPLC:** Chiralcel OJ-H, 5% IPA in hexanes, 15 min run, 1 mL/min.

**Racemic Standard:**

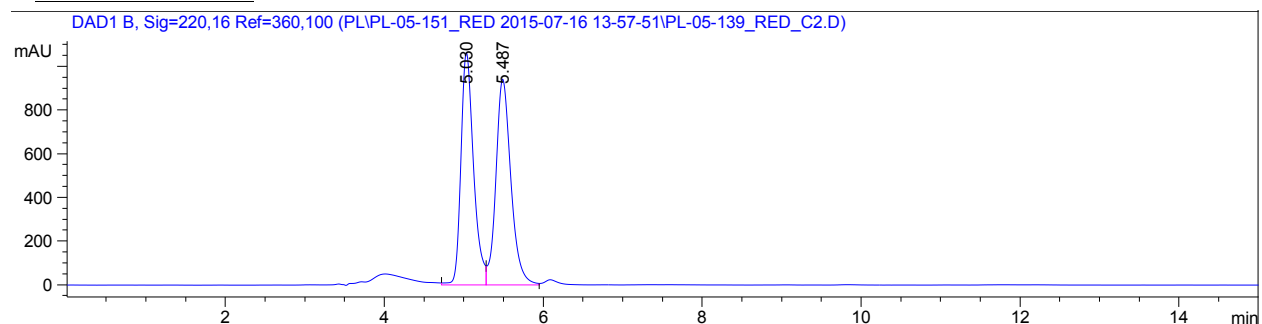

| Peak #   | RetTime [min] | Type | Width [min] | Area [mAU*s] | Height [mAU] | Area %  |
|----------|---------------|------|-------------|--------------|--------------|---------|
| 1        | 5.030         | VV   | 0.1691      | 1.17763e4    | 1064.23950   | 48.8330 |
| 2        | 5.487         | VV   | 0.1988      | 1.23391e4    | 942.06964    | 51.1670 |
| Totals : |               |      |             | 2.41154e4    | 2006.30914   |         |

**Enantioenriched:**

DAD1 B, Sig=220,16 Ref=360,100 (PL\PL-05-151\_RED 2015-07-16 13-57-51\PL-05-151\_RED.D)

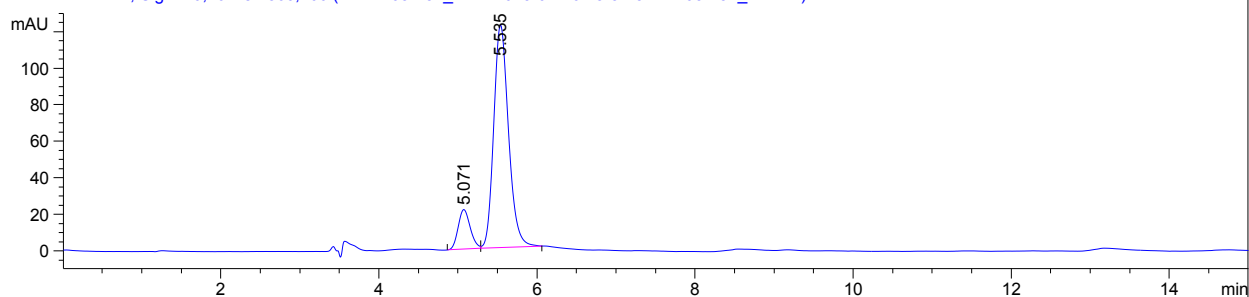

| Peak #   | RetTime [min] | Type | Width [min] | Area [mAU*s] | Height [mAU] | Area %  |
|----------|---------------|------|-------------|--------------|--------------|---------|
| 1        | 5.070         | BV   | 0.1556      | 15.70452     | 1.48288      | 12.7406 |
| 2        | 5.534         | VB   | 0.2030      | 107.55946    | 8.09679      | 87.2594 |
| Totals : |               |      |             | 123.26398    | 9.57967      |         |

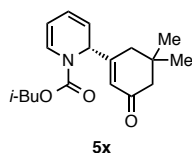

**Isobutyl 2-(5,5-dimethyl-3-oxocyclohex-1-en-1-yl)pyridine-1(2H)-carboxylate (5x):** General procedure was followed with pyridine (40 mg, 0.50 mmol) with the following modifications: the vinylzinc iodide was used, and was prepared according to literature procedure.<sup>8</sup> No reaction was observed at the typical reaction temperature of  $-40\text{ }^{\circ}\text{C}$ ; instead, the reaction was allowed to warm from  $-78\text{ }^{\circ}\text{C}$   $\rightarrow$  rt overnight. **5x** (84 mg, 0.28 mmol 55% yield, 55% ee) was isolated as a clear, yellow oil. (run 1). Run 2 provided 56% yield, 55% ee.

**<sup>1</sup>H NMR (300 MHz, CDCl<sub>3</sub>):**  $\delta$  6.87 (dd,  $J = 39.2, 8.5$  Hz, 1H), 5.99 (dd,  $J = 9.5, 5.6$  Hz, 1H), 5.90 (d,  $J = 8.9$  Hz, 1H), 5.62–5.39 (m, 1H), 5.37–5.11 (m, 2H), 4.04–3.90 (m, 2H), 2.27 (s, 2H), 2.22 (s, 2H), 2.10–1.79 (m, 1H), 1.03 (s, 6H), 0.99–0.87 (m, 6H) ppm.

**<sup>13</sup>C NMR (125 MHz, CDCl<sub>3</sub>):**  $\delta$  200.50, 160.25, [126.79, 125.77\*], [124.66, 123.97], [123.45, 123.03\*], [122.60\*, 122.32], [118.44\*, 118.18], [104.75\*, 104.49], 72.89, [58.15, 56.82\*], 51.44, [39.69\*, 39.11], [34.01\*, 33.90], [28.77, 28.49\*], [28.17\*, 28.06], [28.00, 27.87\*], [19.19\*, 19.05] ppm. (The two diastereotopic isobutyl Me carbons have the same chemical shift.)

**HRMS:** (ESI-TOF) calculated for C<sub>18</sub>H<sub>26</sub>NO<sub>3</sub> ( $[\text{M}+\text{H}]^+$ ): 304.1907, found: 304.1873.

**FTIR (thin film, cm<sup>-1</sup>):** 2959, 1711, 1669, 1279, 1246.

<sup>8</sup> Knochel, P.; Rao, C. J. *Tetrahedron*, **1993**, *49*, 29–48.

**Optical rotation:**  $[\alpha]_D^{26} +88.0$  (c 0.59, CHCl<sub>3</sub>).

**HPLC:** Chiralcel OD-H, 5% IPA in hexanes, 30 min run, 1 mL/min.

**Racemic Standard:**

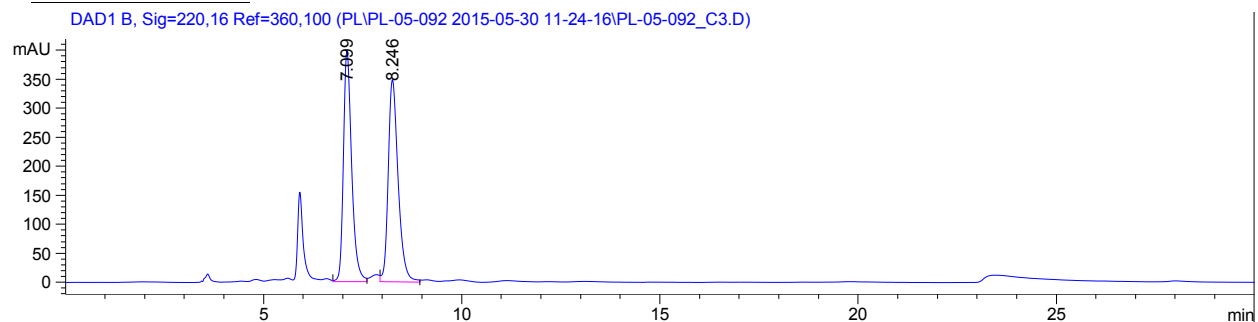

| Peak #   | RetTime [min] | Type | Width [min] | Area [mAU*s] | Height [mAU] | Area %  |
|----------|---------------|------|-------------|--------------|--------------|---------|
| 1        | 7.099         | VV   | 0.2195      | 5795.53125   | 398.97430    | 48.8004 |
| 2        | 8.246         | VB   | 0.2633      | 6080.45801   | 348.89514    | 51.1996 |
| Totals : |               |      |             | 1.18760e4    | 747.86945    |         |

**Enantioenriched:**

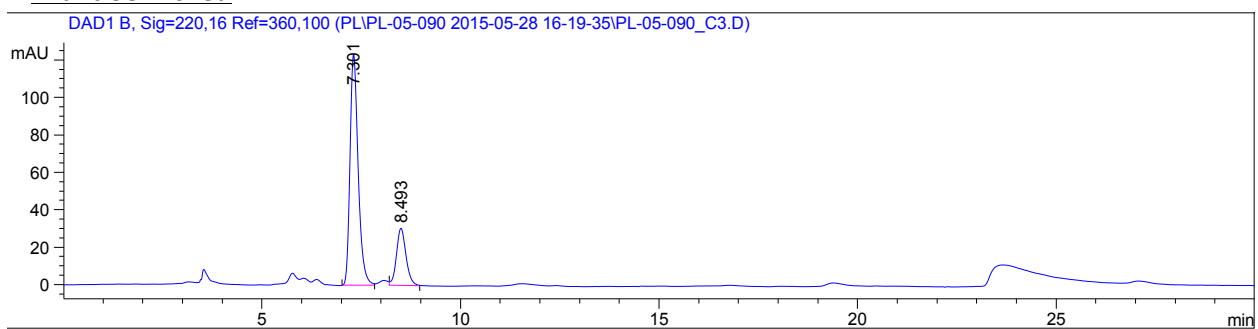

| Peak #   | RetTime [min] | Type | Width [min] | Area [mAU*s] | Height [mAU] | Area %  |
|----------|---------------|------|-------------|--------------|--------------|---------|
| 1        | 7.301         | BB   | 0.2168      | 1765.17200   | 123.48444    | 77.4268 |
| 2        | 8.493         | VB   | 0.2562      | 514.62146    | 30.60568     | 22.5732 |
| Totals : |               |      |             | 2279.79346   | 154.09013    |         |

#### IV. Derivatization Procedures/Characterization of Compounds 7–15

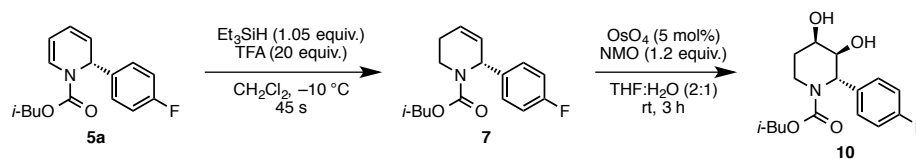

**(R)-Isobutyl 6-(4-fluorophenyl)-3,6-dihydropyridine-1(2H)-carboxylate (7)<sup>9</sup>:** In a threaded 16 mm x 100 mm glass vial equipped with a stir bar, **5a** (103 mg, 0.374 mmol, 1.0 equiv.) was dissolved in  $\text{CH}_2\text{Cl}_2$  (2 mL). A solution of triethylsilane (63  $\mu\text{L}$ , 0.39 mmol, 1.1 equiv.) in  $\text{CH}_2\text{Cl}_2$  (1 mL) was added. The solution was cooled to  $-10\text{ }^\circ\text{C}$  in a Cryocool, and trifluoroacetic acid (0.57 mL, 7.5 mmol, 20 equiv.) was added in one portion. The reaction was allowed to stir at  $-10\text{ }^\circ\text{C}$  for 45 s, then the reaction was neutralized with sat. aq.  $\text{NaHCO}_3$ . The reaction mixture was extracted with  $\text{CH}_2\text{Cl}_2$  (3 x 10 mL), and the combined organic fractions were dried over  $\text{MgSO}_4$  and concentrated *in vacuo*. The crude mixture was purified by automated column chromatography (1 $\rightarrow$ 8% EtOAc in hexanes) to give **7** as a clear, colorless oil (62 mg, 0.22 mmol, 60% yield, 88% ee).

**<sup>1</sup>H NMR (300 MHz,  $\text{CDCl}_3$ ):**  $\delta$  7.36 (br. s, 2H), 7.01 (t,  $J = 8.7$  Hz, 2H), 6.13–5.98 (m, 1H), 5.89–5.79 (m, 1), 5.71–5.45 (m, 1H), 4.31–4.01 (m, 1H), 4.00–3.79 (m, 2H), 2.91 (ddd,  $J = 13.3, 12.0, 4.0$  Hz, 1H), 2.46–2.21 (m, 1H), 2.16–1.97 (m, 1H), 1.93 (sept.,  $J = 6.7$  Hz, 1H), 0.92 (d,  $J = 6.7$  Hz, 6H) ppm.

**<sup>13</sup>C NMR (125 MHz,  $\text{CDCl}_3$ ):**  $\delta$  162.28 (d,  $J = 246.2$  Hz), 155.62, 136.82, 129.56 (d,  $J = 71.8$  Hz), 127.05, 126.79, 115.28 (d,  $J = 21.3$  Hz), 71.79, 54.23, 36.97, 28.17, 25.06, 19.30 ppm. (The two diastereotopic Me carbons have the same chemical shift.)

**<sup>19</sup>F NMR (282 MHz,  $\text{CDCl}_3$ ):**  $\delta$  -115.23 ppm.

**HRMS:** (ESI-TOF) calculated for  $\text{C}_{16}\text{H}_{21}\text{FNO}_2$  ( $[\text{M}+\text{H}]^+$ ): 278.1551, found: 278.1525.

**FTIR (thin film,  $\text{cm}^{-1}$ ):** 2962, 1695, 1508, 1425, 1223, 1109.

**Optical rotation:**  $[\alpha]_D^{26}$  -1.9 (c 1.0,  $\text{CHCl}_3$ ).

**HPLC:** Chiralcel OJ-H, 5% IPA in hexanes, 15 min run, 1 mL/min.

<sup>9</sup> Mancheño, O. G.; Asmus, S.; Zurro, M.; Fischer, T. *Angew. Chem. Int. Ed.* **2015**, *54*, 8823–8827.

**Racemic Standard:**

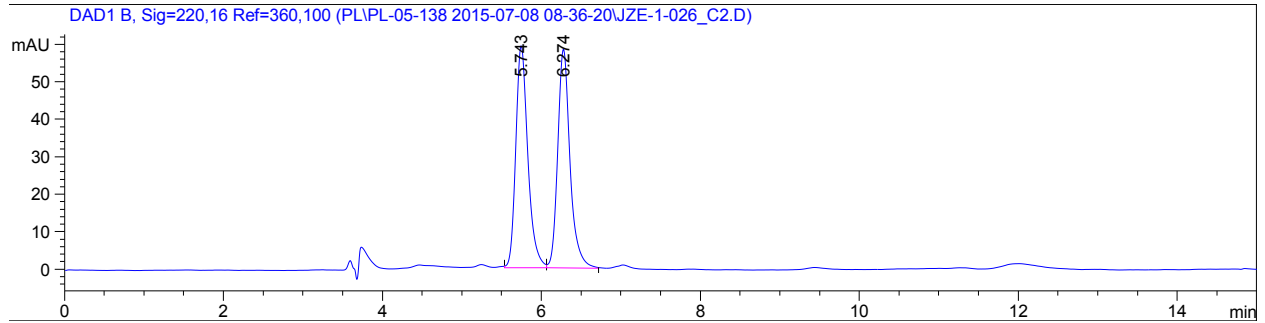

| Peak # | RetTime [min] | Type | Width [min] | Area [mAU*s] | Height [mAU] | Area %  |
|--------|---------------|------|-------------|--------------|--------------|---------|
| 1      | 5.743         | BV   | 0.1612      | 625.90216    | 59.27720     | 49.7585 |
| 2      | 6.274         | VB   | 0.1640      | 631.97870    | 58.51051     | 50.2415 |

Totals : 1257.88086 117.78771

**Enantioenriched:**

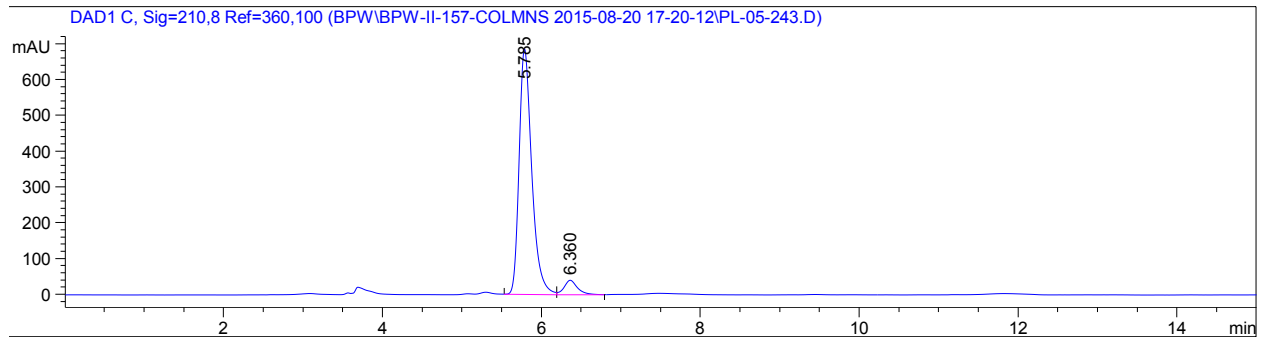

| Peak # | RetTime [min] | Type | Width [min] | Area [mAU*s] | Height [mAU] | Area %  |
|--------|---------------|------|-------------|--------------|--------------|---------|
| 1      | 5.785         | VV   | 0.1672      | 7608.74902   | 686.81000    | 94.0579 |
| 2      | 6.360         | VB   | 0.1762      | 480.68155    | 40.57185     | 5.9421  |

Totals : 8089.43057 727.38185



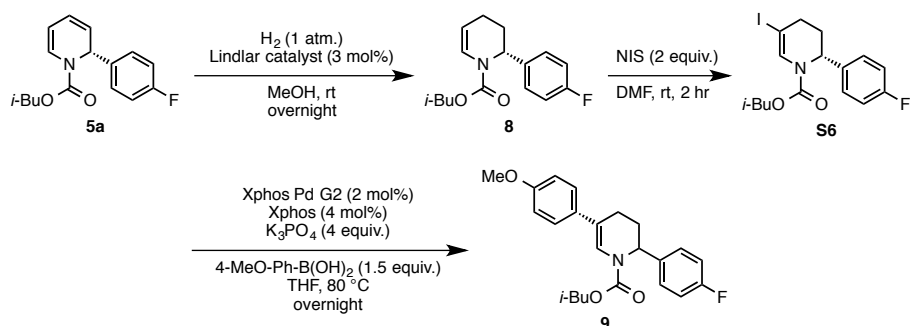

**(R)-Isobutyl 2-(4-fluorophenyl)-3,4-dihydropyridine-1(2H)-carboxylate (8)<sup>10</sup>:** Compound **5a** (104 mg, 0.376 mmol, 1.0 equiv.) was dissolved in MeOH (2 mL) in a 2-dram vial charged with a stir bar. Lindlar catalyst (24 mg, 0.011 mmol, 3.0 mol%) was added, and the vial was capped with a septum cap. The vial was evacuated and refilled with a balloon of H<sub>2</sub>. The reaction was allowed to stir at rt under 1 atm H<sub>2</sub> overnight. The reaction mixture was filtered through Celite with Et<sub>2</sub>O and concentrated *in vacuo* to give **8** (96 mg, 0.35 mmol, 92% yield, 90% ee) as a clear, colorless oil, which was used without further purification.

**<sup>1</sup>H NMR (300 MHz, CDCl<sub>3</sub>):** δ 7.21–6.92 (m, 5H), 5.53–5.17 (m, 1H), 5.11–4.84 (m, 1H), 4.11–3.72 (m, 2H), 2.19–1.66 (m, 5H), 1.12–0.58 (m, 6H) ppm.

**<sup>13</sup>C NMR (125 MHz, CDCl<sub>3</sub>):** δ 161.87 (d, *J* = 244.2 Hz), 149.82, 136.98, 128.84 (d, *J* = 8.4 Hz), [127.75, 127.06\*], [125.33\*, 124.82], [115.80 (d, *J* = 21.5 Hz), 115.32\* (d, *J* = 21.4 Hz)], [106.35, 106.17], [72.31, 72.03\*], [54.41\*, 53.72], [27.87\*, 27.56], [19.29\*, 19.23], [18.85, 18.83\*], [17.30\*, 16.99] ppm.

**<sup>19</sup>F NMR (282 MHz, CDCl<sub>3</sub>):** δ [−116.36\*, −116.51] ppm.

**HRMS:** (ESI-TOF) calculated for C<sub>16</sub>H<sub>21</sub>FNO<sub>2</sub> ([M+H]<sup>+</sup>): 278.1551, found: 278.1538.

**FTIR (thin film, cm<sup>-1</sup>):** 2961, 2875, 1701, 1512, 1407, 1229.

**Optical rotation:** [α]<sub>D</sub><sup>26</sup> +48.5 (c 1.1, CHCl<sub>3</sub>).

**HPLC:** Chiralcel OJ-H, 5% IPA in hexanes, 15 min run, 1 mL/min.

<sup>10</sup> Trost, B. M.; Biannic, B. *Org. Lett.* **2015**, *17*, 1433–1436.

### Racemic Standard:

DAD1 B, Sig=220,16 Ref=360,100 (PL\PL-05-016 2015-07-07 15-05-06\PL-05-016\_C2.D)

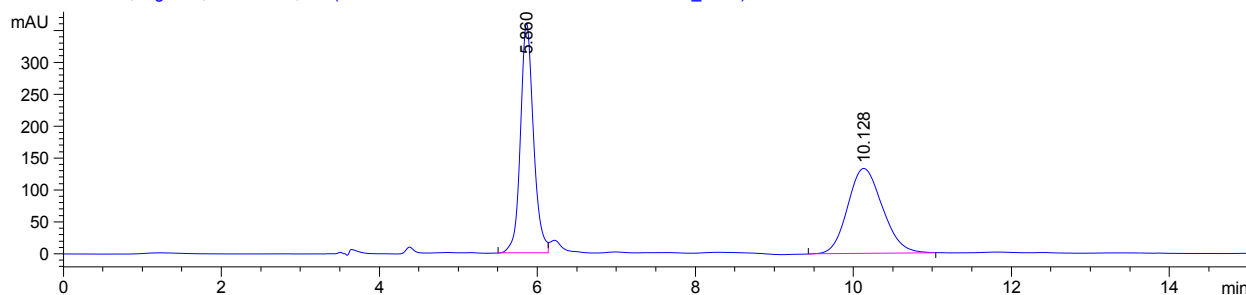

| Peak # | RetTime [min] | Type | Width [min] | Area [mAU*s] | Height [mAU] | Area %  |
|--------|---------------|------|-------------|--------------|--------------|---------|
| 1      | 5.860         | BV   | 0.1740      | 4137.99707   | 360.33514    | 50.3411 |
| 2      | 10.128        | BB   | 0.4713      | 4081.91797   | 133.30258    | 49.6589 |

Totals : 8219.91504 493.63773

### Enantioenriched:

DAD1 B, Sig=220,16 Ref=360,100 (PL\PL-05-170 2015-07-23 19-42-10\PL-05-170.D)

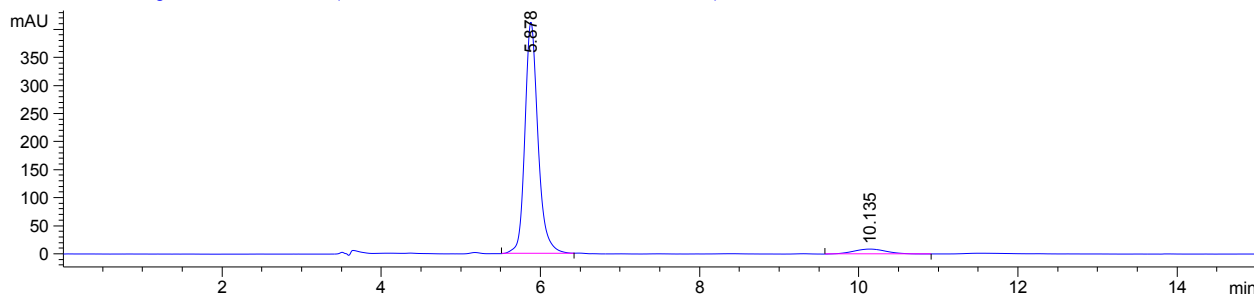

| Peak # | RetTime [min] | Type | Width [min] | Area [mAU*s] | Height [mAU] | Area %  |
|--------|---------------|------|-------------|--------------|--------------|---------|
| 1      | 5.878         | BB   | 0.1755      | 4719.14893   | 412.39029    | 94.9467 |
| 2      | 10.135        | BB   | 0.4447      | 251.16324    | 8.75399      | 5.0533  |

Totals : 4970.31216 421.14428

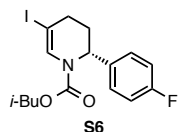

**(R)-Isobutyl 2-(4-fluorophenyl)-5-iodo-3,4-dihydropyridine-1(2H)-carboxylate (S6):** In a 25-mL round-bottomed flask equipped with a stir bar, **8** (110 mg, 0.396 mmol, 1.00 equiv.) was dissolved in DMF (2 mL). *N*-Iodosuccinimide (recrystallized from 1:1 Et<sub>2</sub>O:dioxanes, 178 mg, 0.793 mmol, 2.00 equiv.) was added, and the reaction was allowed to stir at rt for 2 h. The reaction was quenched with 10% aq.

Na<sub>2</sub>S<sub>2</sub>O<sub>3</sub> (2 mL) and extracted with Et<sub>2</sub>O (3 x 5 mL). The combined organic fractions were washed with brine (1 x 10 mL), dried over MgSO<sub>4</sub>, and concentrated *in vacuo*. The crude product was purified by automated column chromatography (1→10% EtOAc in hexanes) to give **S6** (101 mg, 0.249 mmol, 63% yield, 90% ee) as a clear, colorless oil.

**<sup>1</sup>H NMR (300 MHz, CDCl<sub>3</sub>):** δ 7.70–7.40 (m, 1H), 7.18–7.07 (m, 2H), 7.01 (t, *J* = 8.7 Hz, 2H), 5.40 (d, *J* = 28.0 Hz, 1H), 3.97–3.63 (m, 2H), 2.45–2.07 (m, 3H), 2.08–1.89 (m, 2H), 1.08–0.59 (m, 6H) ppm.

**<sup>19</sup>F NMR (282 MHz, CDCl<sub>3</sub>):** δ [–115.58, –115.73\*] ppm.

**HPLC:** Chiralcel OJ-H, 5% IPA in hexanes, 15 min run, 1 mL/min.

**Racemic Standard:**

DAD1 B, Sig=220,16 Ref=360,100 (PL\PL-05-145 2015-07-10 16-45-57\PL-05-147\_C2.D)

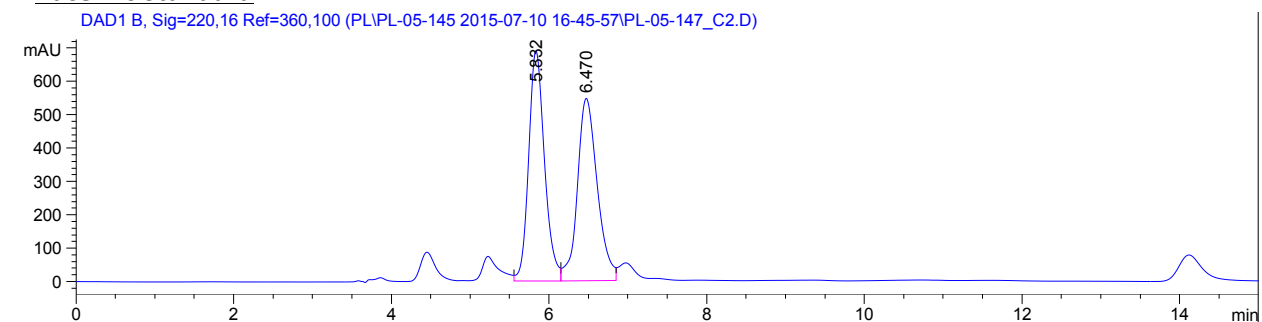

| Peak #   | RetTime [min] | Type | Width [min] | Area [mAU*s] | Height [mAU] | Area %  |
|----------|---------------|------|-------------|--------------|--------------|---------|
| 1        | 5.832         | VV   | 0.2118      | 9693.67676   | 690.53967    | 50.2199 |
| 2        | 6.470         | VV   | 0.2689      | 9608.78027   | 547.20123    | 49.7801 |
| Totals : |               |      |             | 1.93025e4    | 1237.74091   |         |

## Enantioenriched:

DAD1 B, Sig=220,16 Ref=360,100 (BPW\BPW-II-134 2015-07-29 11-17-10\PL-05-181.D)

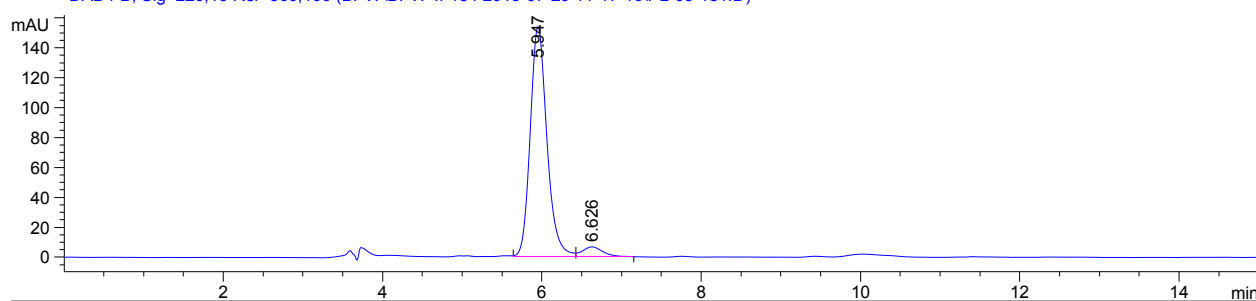

| Peak # | RetTime [min] | Type | Width [min] | Area [mAU*s] | Height [mAU] | Area %  |
|--------|---------------|------|-------------|--------------|--------------|---------|
| 1      | 5.947         | BB   | 0.2243      | 2245.85547   | 153.88699    | 94.8279 |
| 2      | 6.626         | BB   | 0.2674      | 122.49378    | 6.69539      | 5.1721  |

Totals : 2368.34925 160.58238

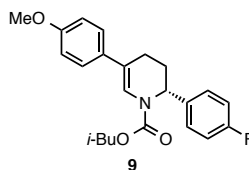

**(R)-Isobutyl 2-(4-fluorophenyl)-5-(4-methoxyphenyl)-3,4-dihydropyridine-1(2H)-carboxylate (9):** To a threaded 16 mm x 100 mm glass vial equipped with a stir bar were added sequentially Xphos Pd G2 (1.8 mg, 2.3  $\mu\text{mol}$ , 2.0 mol%), Xphos (2.2 mg, 4.5  $\mu\text{mol}$ , 4.0 mol%),  $\text{K}_3\text{PO}_4$  (48 mg, 0.23 mmol, 2.0 equiv.), and (4-methoxyphenyl)boronic acid (26 mg, 0.17 mmol, 1.5 equiv.). The vial was evacuated and refilled with  $\text{N}_2$  (x3), and **56** (45.7 mg, 0.113 mmol, 1.0 equiv.) was added as a solution in dry THF (1 mL). The reaction was allowed to stir at 80  $^\circ\text{C}$  overnight, then quenched with  $\text{H}_2\text{O}$  (10 mL). The resulting mixture was extracted with  $\text{Et}_2\text{O}$  (3 x 10 mL), and the combined organic fractions were dried over  $\text{MgSO}_4$  and concentrated *in vacuo*. Automated column chromatography (1 $\rightarrow$ 15% EtOAc in hexanes) provided **9** (26 mg, 0.068 mmol, 60% yield, 90% ee) as a clear, colorless oil.

**$^1\text{H}$  NMR (300 MHz,  $\text{CDCl}_3$ ):**  $\delta$  7.52 (d,  $J$  = 51.3 Hz, 1H), 7.33 (d,  $J$  = 8.4 Hz, 2H), 7.20–7.10 (m, 2H), 6.97 (t,  $J$  = 8.7 Hz, 2H), 6.87 (d,  $J$  = 8.6 Hz, 2H), 5.40 (d,  $J$  = 33.3 Hz, 1H), 4.06–3.85 (m, 2H), 3.81 (s, 3H), 2.33 (d,  $J$  = 14.9 Hz, 1H), 2.24–2.04 (m, 3H), 1.96–1.69 (m, 1H), 1.06–0.62 (m, 6H) ppm.

**$^{13}\text{C}$  NMR (125 MHz,  $\text{CDCl}_3$ ):**  $\delta$  161.93 (d,  $J$  = 245.0 Hz), 158.37, [137.94\*, 137.34], [133.59, 132.61\*], [128.23, 126.79\*], [127.12\*, 127.06], 125.50, [121.32\*, 120.83], [115.50, 115.33\*], [114.08, 114.03\*], [72.49, 72.24\*], [71.88\*, 71.79], 55.49, [54.01\*, 53.39], [28.18\*, 28.10], [27.96\*, 27.75], [20.11, 19.62\*], [19.29\*, 19.23], [18.92, 18.84] ppm.

**$^{19}\text{F}$  NMR (282 MHz,  $\text{CDCl}_3$ ):**  $\delta$  [−116.11\*, −116.26] ppm.

**HRMS:** (ESI-TOF) calculated for  $C_{23}H_{27}FNO_3$  ( $[M+H]^+$ ): 384.1969, found: 384.1941.

**FTIR (thin film,  $cm^{-1}$ ):** 2959, 1702, 1506, 1403, 1322, 1249.

**Optical rotation:**  $[\alpha]_D^{26} +97.0$  (c 0.88,  $CHCl_3$ ).

**HPLC:** Chiralcel OD-H, 5% IPA in hexanes, 30 min run, 1 mL/min.

**Racemic Standard:**

DAD1 A, Sig=254,4 Ref=360,100 (PLIPL-05-007 2015-07-14 16-20-25/PL-05-007\_C3.D)

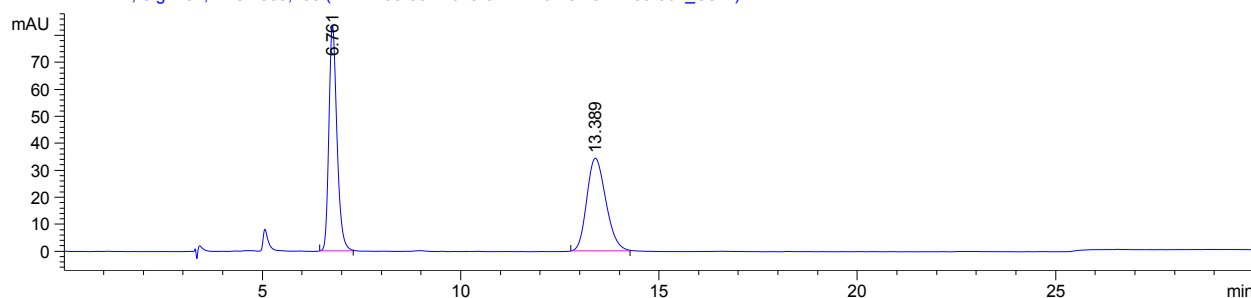

| Peak #   | RetTime [min] | Type | Width [min] | Area [mAU*s] | Height [mAU] | Area %  |
|----------|---------------|------|-------------|--------------|--------------|---------|
| 1        | 6.761         | BB   | 0.2149      | 1183.37732   | 83.71516     | 50.6544 |
| 2        | 13.389        | BB   | 0.5185      | 1152.80237   | 34.43817     | 49.3456 |
| Totals : |               |      |             | 2336.17969   | 118.15333    |         |

**Enantioenriched:**

DAD1 A, Sig=254,4 Ref=360,100 (PLIPL-05-175 2015-07-28 11-29-23/PL-05-175\_RERUN.D)

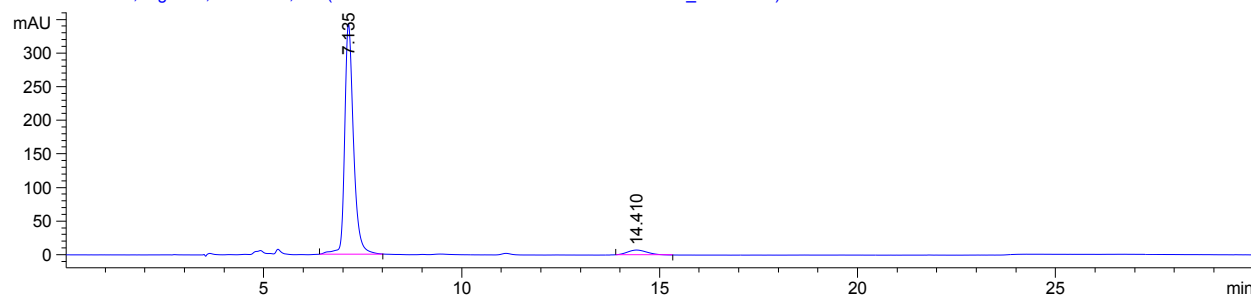

| Peak #   | RetTime [min] | Type | Width [min] | Area [mAU*s] | Height [mAU] | Area %  |
|----------|---------------|------|-------------|--------------|--------------|---------|
| 1        | 7.135         | BB   | 0.2332      | 5326.82422   | 343.01379    | 95.2312 |
| 2        | 14.410        | BB   | 0.5419      | 266.74881    | 7.41152      | 4.7688  |
| Totals : |               |      |             | 5593.57303   | 350.42531    |         |

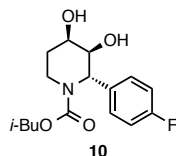

**(2S,3S,4R)-Isobutyl 2-(4-fluorophenyl)-3,4-dihydroxypiperidine-1-carboxylate (10):** In a 2-dram vial equipped with a stir bar, **7** (30 mg, 0.11 mmol, 1.0 equiv.) was dissolved in THF:H<sub>2</sub>O (2:1, 0.3 mL). *N*-Methylmorpholine *N*-oxide (50 wt% in water, 30  $\mu$ L, 0.13 mmol, 1.2 equiv.) was added, followed by OsO<sub>4</sub> (4 wt% in water, 34  $\mu$ L, 5.4  $\mu$ mol, 0.050 equiv.). The reaction was allowed to stir at rt for 3 h, then 2 mL water was added. The reaction mixture was extracted with Et<sub>2</sub>O (6 x 2 mL), and the combined organic fractions were dried over MgSO<sub>4</sub> and concentrated *in vacuo* to provide **10** (24 mg, 0.076 mmol, 70% yield, >20:1 dr) as a clear, amber oil.

**<sup>1</sup>H NMR (300 MHz, CDCl<sub>3</sub>):**  $\delta$  7.20 (dd,  $J$  = 8.0, 5.3 Hz, 2H), 7.04 (t,  $J$  = 8.6 Hz, 2H), 5.61 (s, 1H), 4.49 (s, 1H), 4.22 (d,  $J$  = 13.4 Hz, 1H), 3.93 (dd,  $J$  = 6.6, 2.1 Hz, 2H), 3.80–3.56 (m, 1H), 2.87 (td,  $J$  = 13.6, 3.0 Hz, 1H), 2.50–2.31 (m, 1H), 2.07–1.81 (m, 3H), 1.82–1.56 (m, 1H), 0.90 (d,  $J$  = 6.7 Hz, 6H) ppm.

**<sup>13</sup>C NMR (125 MHz, CDCl<sub>3</sub>):**  $\delta$  162.00 (d,  $J$  = 246.6 Hz), 157.35, 132.49 (d,  $J$  = 3.2 Hz), 127.95 (d,  $J$  = 8.0 Hz), 115.96 (d,  $J$  = 21.4 Hz), 72.26, 70.55, 66.83, 59.43, 39.08, 28.13, 19.19, 6.74, 5.93 ppm.

**<sup>19</sup>F NMR (282 MHz, CDCl<sub>3</sub>):**  $\delta$  -115.21 ppm.

**HRMS:** (ESI-TOF) calculated for C<sub>16</sub>H<sub>23</sub>FNO<sub>4</sub> ([M+H]<sup>+</sup>): 312.1606, found: 312.1598.

**FTIR (thin film, cm<sup>-1</sup>):** 3409, 2961, 1673, 1510, 1430, 1327.

**Optical rotation:**  $[\alpha]_D^{26}$  -6.8 (c 1.1, CHCl<sub>3</sub>).

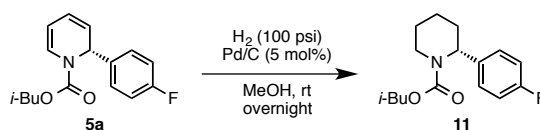

**(R)-Isobutyl 2-(4-fluorophenyl)piperidine-1-carboxylate (11):** In a 2-dram vial equipped with a stir bar, **5a** (99 mg, 0.36 mmol, 1.0 equiv.) was dissolved in MeOH (2 mL). Palladium on carbon (19 mg of 10 wt% catalyst, 0.018 mmol, 5.0 mol%) was added and the vial was capped with a septum cap pierced with an 18 G needle. The vial was transferred to a Parr reactor, which was filled with H<sub>2</sub> (100 psi). The reaction was left to stir at rt overnight. The crude reaction mixture was filtered through Celite with Et<sub>2</sub>O, and the solvent was removed *in vacuo* to provide **11** (93 mg, 0.33 mmol, 92% yield, 89% ee) as a clear, colorless oil, which was used without further purification.

**<sup>1</sup>H NMR (300 MHz, CDCl<sub>3</sub>):**  $\delta$  7.19 (dd,  $J$  = 8.0, 5.4 Hz, 2H), 7.02 (t,  $J$  = 8.7 Hz, 2H), 5.44 (d,  $J$  = 4.5 Hz, 1H), 4.09 (d,  $J$  = 12.6 Hz, 1H), 3.92 (dd,  $J$  = 6.6, 4.1 Hz, 2H), 2.78 (ddd,  $J$  = 13.5, 11.5, 3.9 Hz, 1H), 2.27 (d,  $J$  = 14.4 Hz, 1H), 2.01–1.78 (m, 2H), 1.73–1.57 (m, 2H), 1.53–1.37 (m, 2H), 0.90 (d,  $J$  = 6.7 Hz, 6H) ppm.

**<sup>13</sup>C NMR (125 MHz, CDCl<sub>3</sub>):** δ 161.67 (d, *J* = 244.8 Hz), 156.50, 135.78 (d, *J* = 3.1 Hz), 128.26 (d, *J* = 7.9 Hz), 115.50 (d, *J* = 21.2 Hz), 71.79, 52.99, 40.34, 28.24, 28.18, 25.54, 19.39, 19.24, 19.23 ppm.

**<sup>19</sup>F NMR (282 MHz, CDCl<sub>3</sub>):** δ -116.93 ppm.

**HRMS:** (ESI-TOF) calculated for C<sub>16</sub>H<sub>23</sub>FNO<sub>2</sub> ([M+H]<sup>+</sup>): 280.1707, found: 280.1686.

**FTIR (thin film, cm<sup>-1</sup>):** 2944, 2871, 1693, 1509, 1423, 1258, 1158.

**Optical rotation:** [α]<sub>D</sub><sup>26</sup> +80.2 (c 1.0, CHCl<sub>3</sub>).

**HPLC:** Chiralcel OJ-H, 5% IPA in hexanes, 15 min run, 1 mL/min.

**Racemic Standard:**

DAD1 B, Sig=220,16 Ref=360,100 (PL\PL-05-002 2015-07-10 10-19-02\PL-05-002\_C2.D)

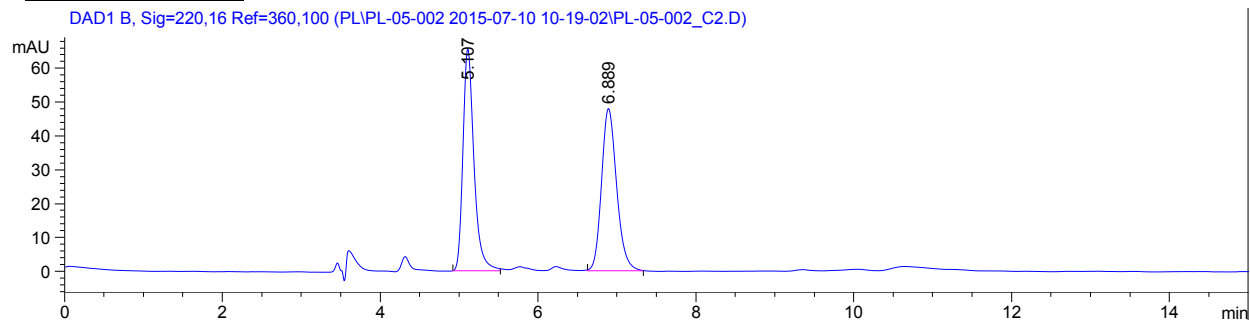

| Peak #   | RetTime [min] | Type | Width [min] | Area [mAU*s] | Height [mAU] | Area %  |
|----------|---------------|------|-------------|--------------|--------------|---------|
| 1        | 5.107         | BB   | 0.1477      | 640.28522    | 65.67620     | 49.9236 |
| 2        | 6.889         | BB   | 0.2039      | 642.24493    | 48.05778     | 50.0764 |
| Totals : |               |      |             | 1282.53015   | 113.73398    |         |

**Enantioenriched:**

DAD1 B, Sig=220,16 Ref=360,100 (PLIPL-05-174 2015-07-24 10-13-25\PL-05-174.D)

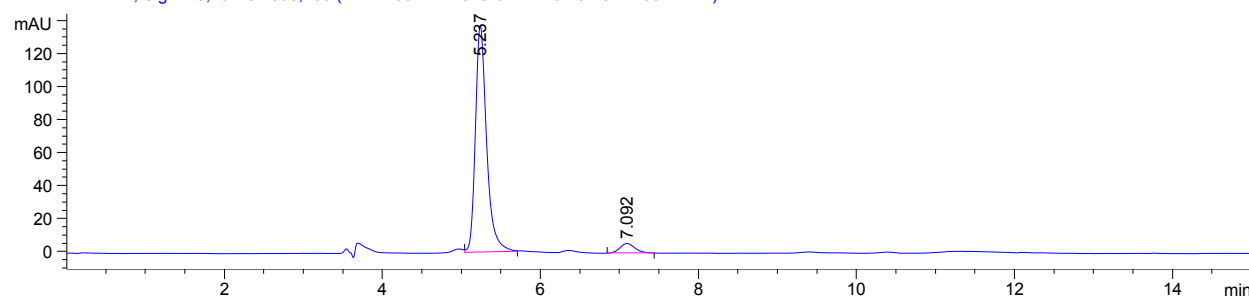

| Peak #   | RetTime [min] | Type | Width [min] | Area [mAU*s] | Height [mAU] | Area %  |
|----------|---------------|------|-------------|--------------|--------------|---------|
| 1        | 5.237         | VB   | 0.1491      | 1356.38782   | 137.49344    | 94.4637 |
| 2        | 7.092         | BB   | 0.2086      | 79.49426     | 5.84854      | 5.5363  |
| Totals : |               |      |             | 1435.88207   | 143.34198    |         |

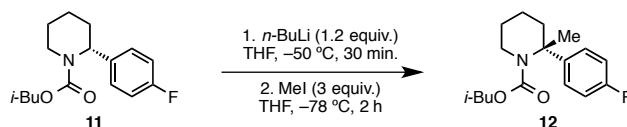

**(R)-Isobutyl 2-(4-fluorophenyl)-2-methylpiperidine-1-carboxylate (12)<sup>11</sup>:** In a threaded 16 mm x 100 mm glass vial under N<sub>2</sub> and equipped with a stir bar, **11** (164 mg, 0.587 mmol, 1.0 equiv.) was dissolved in dry THF (4 mL). The vial was cooled to –78 °C and *n*-BuLi (titrated as 2.4 M in hexanes, 0.29 mL, 0.70 mmol, 1.2 equiv.) was added. The reaction was moved to a Cryocool at –50 °C and allowed to stir at this temperature for 30 min. At this point, the reaction was again cooled to –78 °C and MeI (0.11 mL, 1.8 mmol, 3.0 equiv.) was added. The reaction was allowed to stir 2 h at –78 °C, then quenched with glacial acetic acid (0.5 mL). The crude reaction mixture was filtered through Celite and concentrated *in vacuo*, then purified by automated column chromatography (1→15% EtOAc in hexanes) to give **12** (141 mg, 0.481 mmol, 82% yield, 88% ee) as a clear, colorless oil.

**<sup>1</sup>H NMR (300 MHz, CDCl<sub>3</sub>):** δ 7.23 (d, *J* = 5.3 Hz, 2H), 6.97 (t, *J* = 8.8 Hz, 2H), 3.73–3.59 (m, 4H), 1.91–1.79 (m, 2H), 1.76 (s, 3H), 1.76–1.66 (m, 2H), 1.65–1.56 (m, 3H), 0.71 (d, *J* = 6.1 Hz, 6H) ppm.

**<sup>13</sup>C NMR (125 MHz, CDCl<sub>3</sub>):** δ 161.17 (d, *J* = 243.7 Hz), 157.03, 144.85 (d, *J* = 2.5 Hz), 126.18 (d, *J* = 7.8 Hz), 114.92 (d, *J* = 21.1 Hz), 71.57, 41.81, 41.03, 27.88, 25.13, 23.49, 23.28, 19.19, 19.14, 18.14 ppm.

**<sup>19</sup>F NMR (470 MHz, CDCl<sub>3</sub>):** δ –118.21 (tt, *J* = 8.5, 4.9 Hz) ppm.

<sup>11</sup> Sheikh, N. S.; Leonori, D.; Barker, G.; Firth, J. D.; Campos, K. R.; Meijer, A. J. H. M.; O'Brien, P.; Coldham, I. J. *Am. Chem. Soc.* **2012**, *134*, 5300–5308.



**HRMS:** (ESI-TOF) calculated for C<sub>17</sub>H<sub>25</sub>FNO<sub>2</sub> ([M+H]<sup>+</sup>): 294.1864, found: 294.1846.

**FTIR (thin film, cm<sup>-1</sup>):** 2947, 2872, 1687, 1509, 1263, 1226, 1070.

**Optical rotation:** [α]<sub>D</sub><sup>26</sup> +11.8 (c 1.0, CHCl<sub>3</sub>).

**HPLC:** Chiralcel OD-H, 2.5% IPA in hexanes, 30 min run, 1 mL/min.

**Racemic Standard:**

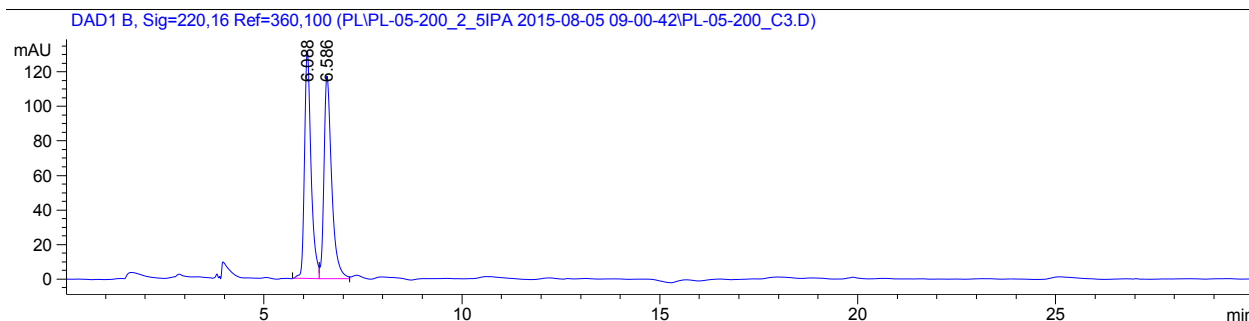

| Peak #   | RetTime [min] | Type | Width [min] | Area [mAU*s] | Height [mAU] | Area %  |
|----------|---------------|------|-------------|--------------|--------------|---------|
| 1        | 6.088         | BV   | 0.1724      | 1521.17444   | 132.00325    | 48.9333 |
| 2        | 6.586         | VB   | 0.2018      | 1587.49255   | 117.40365    | 51.0667 |
| Totals : |               |      |             | 3108.66699   | 249.40690    |         |

**Enantioenriched:**

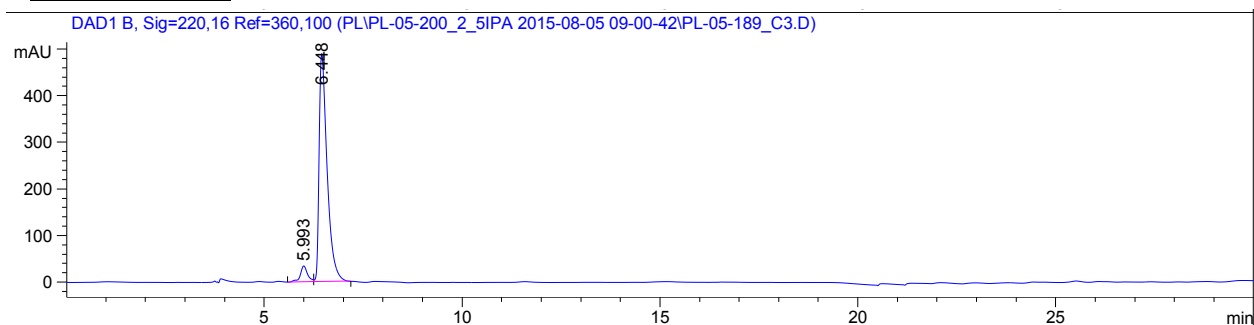

| Peak #   | RetTime [min] | Type | Width [min] | Area [mAU*s] | Height [mAU] | Area %  |
|----------|---------------|------|-------------|--------------|--------------|---------|
| 1        | 5.993         | VV   | 0.1887      | 443.39261    | 34.32303     | 6.0467  |
| 2        | 6.448         | VB   | 0.2103      | 6889.36572   | 489.27774    | 93.9533 |
| Totals : |               |      |             | 7332.75833   | 523.60077    |         |

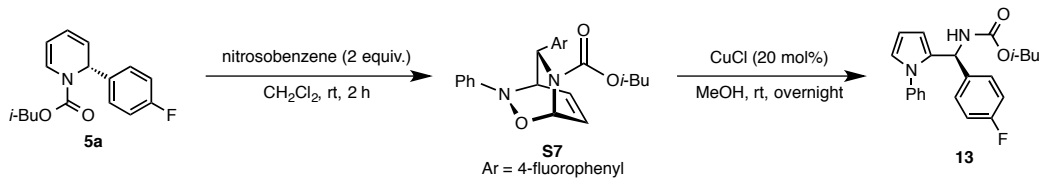

**Isobutyl 6-(4-fluorophenyl)-2-phenyl-3-oxa-2,5-diazabicyclo[2.2.2]oct-7-ene-5-carboxylate (S7)<sup>12</sup>:** In a 25-mL round-bottomed flask equipped with a stir bar, **5a** (107 mg, 0.387 mmol, 1.0 equiv.) was dissolved in CH<sub>2</sub>Cl<sub>2</sub> (1 mL). Nitrosobenzene (83 mg, 0.77 mmol, 2.0 equiv.) was added, and the reaction was allowed to stir at rt for 2 h. The reaction mixture was concentrated *in vacuo*, then purified by automated column chromatography (1→10% EtOAc in hexanes) to give **S7** (129 mg, 0.337 mmol, 87% yield) as a tan solid.

**<sup>1</sup>H NMR (300 MHz, CDCl<sub>3</sub>):** δ 7.27–6.94 (m, 9H), 6.82 (ddd, *J* = 7.7, 5.7, 1.9 Hz, 1H), 6.53–6.42 (m, 1H), 5.94–5.80 (m, 1H), 5.35–5.15 (m, 1H), 4.65–4.48 (m, 1H), 3.95–3.79 (m, 1H), 3.79–3.68 (m, 1H), 1.74–1.59 (m, 1H), 1.07–0.77 (m, 2H), 0.60 (d, *J* = 6.0 Hz, 4H) ppm.

**<sup>19</sup>F NMR (282 MHz, CDCl<sub>3</sub>):** δ –114.91 ppm.

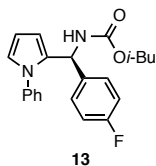

**(S)-Isobutyl ((4-fluorophenyl)(1-phenyl-1H-pyrrol-2-yl)methyl)carbamate (13):** In a 2-dram vial equipped with a stir bar, **S7** (128 mg, 0.335 mmol, 1.00 equiv.) was dissolved in MeOH (4 mL). CuCl (6.6 mg, 0.067 mmol, 0.20 equiv.) was added, and the reaction was allowed to stir at rt overnight. The reaction was quenched with water (10 mL) and extracted with CH<sub>2</sub>Cl<sub>2</sub> (3 x 10 mL). The combined organic fractions were dried with MgSO<sub>4</sub>, concentrated *in vacuo*, and purified by automated column chromatography to give **13** (26 mg, 0.070 mmol, 21% yield, 89% ee) as a clear, colorless oil.

**<sup>1</sup>H NMR (300 MHz, CDCl<sub>3</sub>):** δ 7.43 (dd, *J* = 8.4, 5.5 Hz, 2H), 7.16 (t, *J* = 7.9 Hz, 2H), 6.99 (t, *J* = 8.7 Hz, 2H), 6.73 (t, *J* = 7.3 Hz, 1H), 6.55 (d, *J* = 7.8 Hz, 2H), 6.24 (dd, *J* = 10.1, 5.9 Hz, 1H), 6.10 (dd, *J* = 10.4, 3.7 Hz, 1H), 5.76–5.61 (m, 2H), 4.42–4.24 (m, 1H), 3.87 (s, 1H), 3.73–3.59 (m, 1H), 1.93–1.62 (m, 1H), 1.05–0.51 (m, 6H) ppm.

**<sup>13</sup>C NMR (125 MHz, CDCl<sub>3</sub>):** δ 162.07 (d, *J* = 246.0 Hz), 145.90, 129.86 (d, *J* = 6.8 Hz), [129.75, 129.66\*], [129.25, 128.91], [127.81\*, 127.75], [126.82, 126.53\*], [118.75, 118.50\*], [115.36 (d, *J* = 20.9 Hz), 115.10\* (d, *J* = 21.2 Hz)], [114.15, 113.85\*], 113.54, 78.84, [72.54, 72.45\*], 66.01, [55.90, 54.40], 49.28, [29.85\*, 27.95], [18.93\*, 18.72] ppm.

**<sup>19</sup>F NMR (282 MHz, CDCl<sub>3</sub>):** δ –115.16 ppm.

<sup>12</sup> Bertì, F.; Di Bussolo, V.; Pineschi, M. *J. Org. Chem.* **2013**, *78*, 7324–7329.

**HRMS:** (ESI-TOF) calculated for C<sub>22</sub>H<sub>24</sub>FN<sub>2</sub>O<sub>2</sub> ([M+H]<sup>+</sup>): 367.1816, found: 367.1802.

**FTIR (thin film, cm<sup>-1</sup>):** 2963, 1705, 1602, 1509, 1228.

**Optical rotation:** [α]<sub>D</sub><sup>26</sup> -84.0 (c 0.57, CHCl<sub>3</sub>).

**HPLC:** Chiralpak AD-H, 5% IPA in hexanes, 30 min run, 1 mL/min.

**Racemic Standard:**

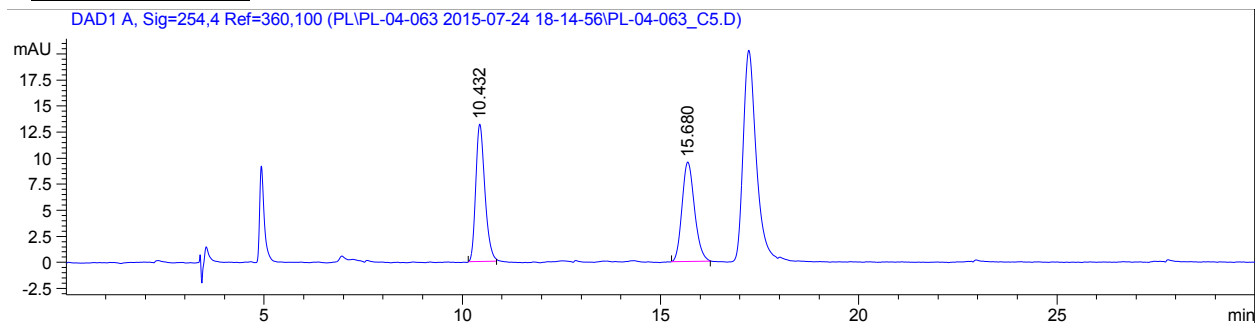

| Peak #   | RetTime [min] | Type | Width [min] | Area [mAU*s] | Height [mAU] | Area %  |
|----------|---------------|------|-------------|--------------|--------------|---------|
| 1        | 10.432        | BB   | 0.2453      | 147.34619    | 9.17585      | 50.3352 |
| 2        | 15.680        | BB   | 0.3343      | 145.38367    | 6.61667      | 49.6648 |
| Totals : |               |      |             | 292.72986    | 15.79253     |         |

**Enantioenriched:**

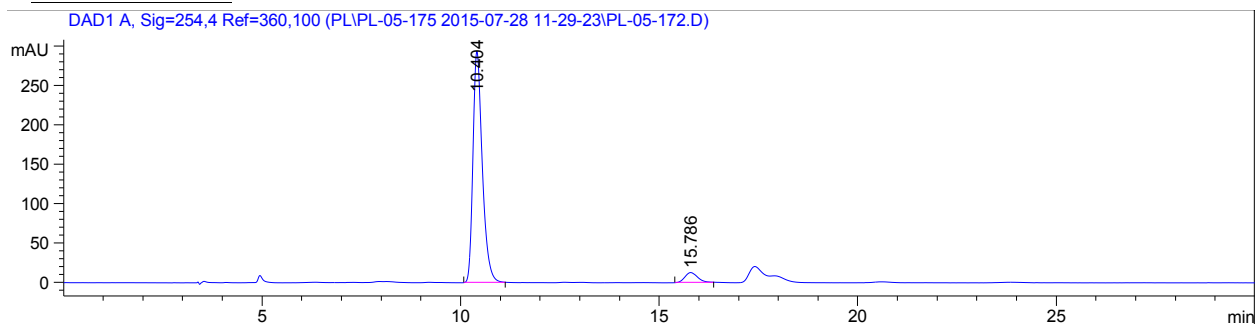

| Peak #   | RetTime [min] | Type | Width [min] | Area [mAU*s] | Height [mAU] | Area %  |
|----------|---------------|------|-------------|--------------|--------------|---------|
| 1        | 10.404        | BB   | 0.2467      | 4805.47510   | 293.92603    | 94.3767 |
| 2        | 15.786        | BB   | 0.3223      | 286.33002    | 12.73737     | 5.6233  |
| Totals : |               |      |             | 5091.80511   | 306.66339    |         |

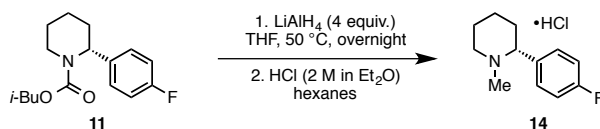

**(R)-2-(4-Fluorophenyl)-1-methylpyrrolidine hydrochloride salt (14):** In a 25-mL round-bottomed flask equipped with a stir bar, **11** (198 mg, 0.709 mmol, 1.0 equiv.) was dissolved in THF (6 mL).  $\text{LiAlH}_4$  (110 mg, 2.90 mmol, 4.0 equiv) was added, and the reaction was allowed to stir at 50 °C overnight. The reaction was cooled to 0 °C and  $\text{H}_2\text{O}$  (0.10 mL), 10% aq.  $\text{NaOH}$  (0.10 mL), and  $\text{H}_2\text{O}$  (0.30 mL) were added sequentially. The crude reaction mixture was filtered through Celite, then filtered through  $\text{MgSO}_4$  and concentrated *in vacuo*. The concentrated material was dissolved in hexanes and  $\text{HCl}$  (2 M in  $\text{Et}_2\text{O}$ , 1 mL) was added to precipitate the  $\text{HCl}$  salt. The precipitate was washed several times with hexanes to provide **14** (128 mg, 0.557 mmol, 79% yield) as a white solid.

In order to determine the ee, the free base was obtained by treatment of **14** with 10% aq.  $\text{NaOH}$ , followed by extraction with  $\text{Et}_2\text{O}$ , drying with  $\text{MgSO}_4$ , and concentration *in vacuo*. The ee of the free base was determined by gas chromatography (89% ee).

**$^1\text{H NMR}$  (500 MHz,  $\text{CDCl}_3$ ):**  $\delta$  12.49 (br. s, 1H), 7.75 (s, 2H), 7.14 (br. s, 2H), 3.67 (d,  $J = 25.0$  Hz, 2H), 2.76 (d,  $J = 84.3$  Hz, 2H), 2.49 (s, 3H), 2.14–1.85 (m, 3H), 1.62 (br. s, 2H) ppm.

**$^{13}\text{C NMR}$  (125 MHz,  $\text{CDCl}_3$ ):**  $\delta$  163.43 (d,  $J = 249.8$  Hz), 131.33 (d,  $J = 3.2$  Hz), 130.57 (d,  $J = 7.6$  Hz), 116.88, 71.71, 58.23, 42.64, 32.69, 23.66, 23.23 ppm.

**$^{19}\text{F NMR}$  (282 MHz,  $\text{CDCl}_3$ ):**  $\delta$  -110.91 ppm.

**HRMS:** (ESI-TOF) calculated for  $\text{C}_{12}\text{H}_{17}\text{FN}$  ( $[\text{M}]^+$ ): 194.1340, found: 194.1330.

**FTIR (thin film,  $\text{cm}^{-1}$ ):** 3400, 2947, 2663, 1607, 1515, 1230.

**Optical rotation (for the  $\text{HCl}$  salt):**  $[\alpha]_{\text{D}}^{26} +4.4$  (c 1.0,  $\text{CHCl}_3$ ).

**GC (for the free base):** Cyclodex-B column, 110 °C isotherm, 1 mL/min.

### Racemic Standard (for the free base):

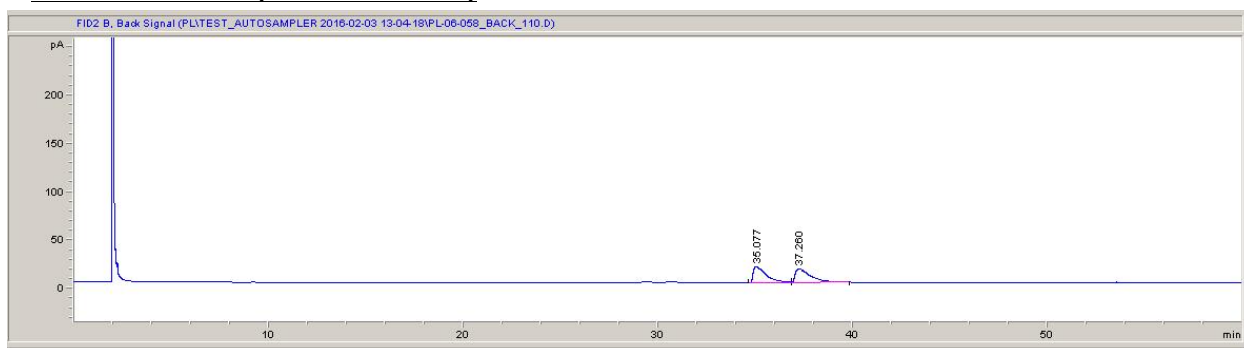

| # | Time   | Area  | Height | Width  | Area%  | Symmetry |
|---|--------|-------|--------|--------|--------|----------|
| 1 | 35.077 | 746.6 | 16.5   | 0.5914 | 49.797 | 0.274    |
| 2 | 37.26  | 752.7 | 13.8   | 0.7037 | 50.203 | 0.273    |

### Enantioenriched (for the free base):

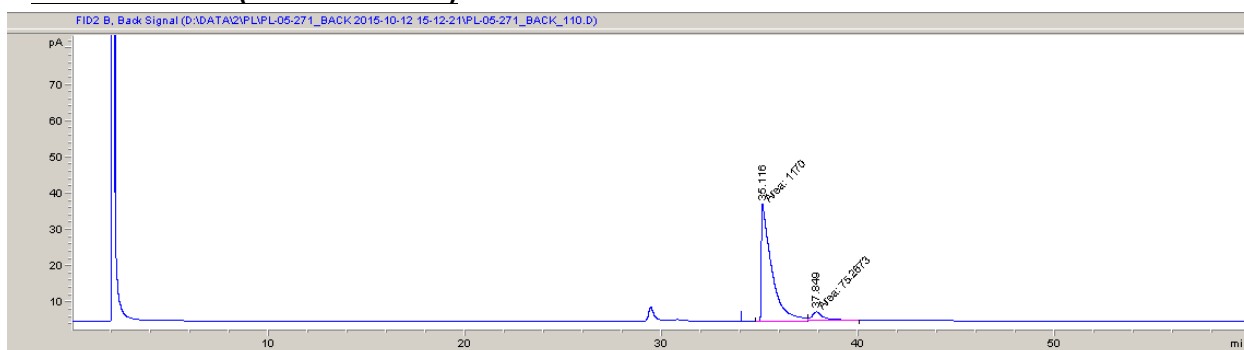

| # | Time   | Area | Height | Width  | Area%  | Symmetry |
|---|--------|------|--------|--------|--------|----------|
| 1 | 35.116 | 1170 | 32.2   | 0.6054 | 93.956 | 0.127    |
| 2 | 37.849 | 75.3 | 2.2    | 0.576  | 6.044  | 0.64     |

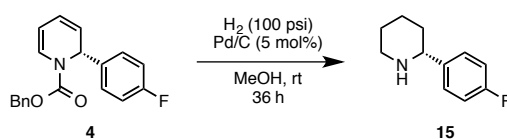

**(R)-2-(4-Fluorophenyl)piperidine (15):** In a 2-dram vial equipped with a stir bar, **4** (110 mg, 0.356 mmol, 1.0 equiv.) was dissolved in MeOH (2 mL). Palladium on carbon (19 mg of 10 wt% catalyst, 0.018 mmol, 5.0 mol%) was added and the vial was capped with a septum cap pierced with an 18 G needle. The vial was transferred to a Parr reactor, which was filled with H<sub>2</sub> (100 psi). The reaction was left to stir at rt for 36 h. The crude reaction mixture was filtered through Celite with Et<sub>2</sub>O, and the solvent was removed *in vacuo* to provide **15** (50 mg, 0.28 mmol, 79% yield) as a light yellow solid.

To determine the ee, **15** was subjected to Boc protection with Boc<sub>2</sub>O and K<sub>2</sub>CO<sub>3</sub>. The Boc-protected piperidine was formed in 88% ee, showing that no degradation of ee had occurred during the Cbz deprotection.

**<sup>1</sup>H NMR (500 MHz, CDCl<sub>3</sub>):** δ 7.55 (dd, *J* = 8.5, 5.2 Hz, 2H), 7.02 (d, *J* = 17.1 Hz, 2H), 3.84 (d, *J* = 14.8 Hz, 1H), 3.08 (d, *J* = 13.5 Hz, 1H), 2.75 (t, *J* = 14.4 Hz, 1H), 2.20–1.85 (m, 4H), 1.74 (d, *J* = 12.6 Hz, 1H), 1.53 (dt, *J* = 13.0, 3.4 Hz, 1H), 1.35–1.06 (m, 1H) ppm.

**<sup>13</sup>C NMR (125 MHz, CDCl<sub>3</sub>):** δ 163.01 (d, *J* = 248.4 Hz), 133.23, 129.99 (d, *J* = 8.3 Hz), 115.98 (d, *J* = 21.7 Hz), 60.83, 45.90, 30.90, 23.52, 22.15 ppm.

**<sup>19</sup>F NMR (282 MHz, CDCl<sub>3</sub>):** δ –112.29 ppm

**HRMS:** (ESI-TOF) calculated for C<sub>11</sub>H<sub>15</sub>FN ([M+H]<sup>+</sup>): 180.1183, found: 180.1176.

**FTIR (thin film, cm<sup>-1</sup>):** 3395, 2935, 2810, 1606, 1514, 1227.

**Optical rotation (for the unprotected piperidine):** [α]<sub>D</sub><sup>26</sup> +8.7 (*c* 1.1, CHCl<sub>3</sub>).

**HPLC (for the Boc-Protected Piperidine):** Chiralpak AD-H, 5% IPA in hexanes, 10 min run, 1 mL/min.

**Racemic Standard (for the Boc-protected piperidine):**

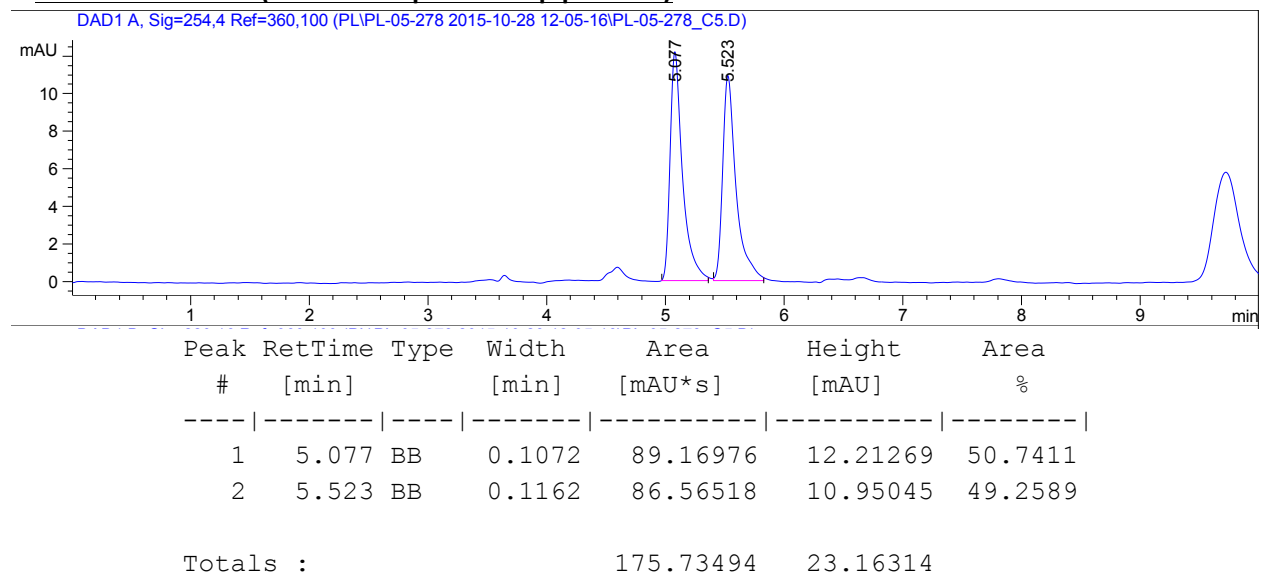

**Enantioenriched (for the Boc-protected piperidine):**

DAD1 B, Sig=220,16 Ref=360,100 (PLIPL-05-256 2015-09-22 08-29-35PL-05-256\_C5.D)

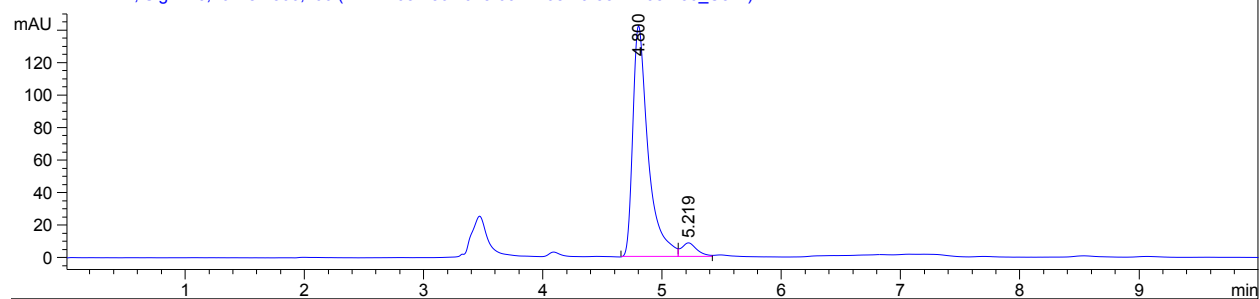

| Peak #   | RetTime [min] | Type | Width [min] | Area [mAU*s] | Height [mAU] | Area %  |
|----------|---------------|------|-------------|--------------|--------------|---------|
| 1        | 4.800         | BV   | 0.1325      | 1275.18359   | 142.41821    | 94.1833 |
| 2        | 5.219         | VV   | 0.1325      | 78.75392     | 8.63079      | 5.8167  |
| Totals : |               |      |             | 1353.93752   | 151.04900    |         |

# VII.VT-NMR Studies of 5a

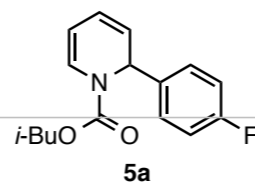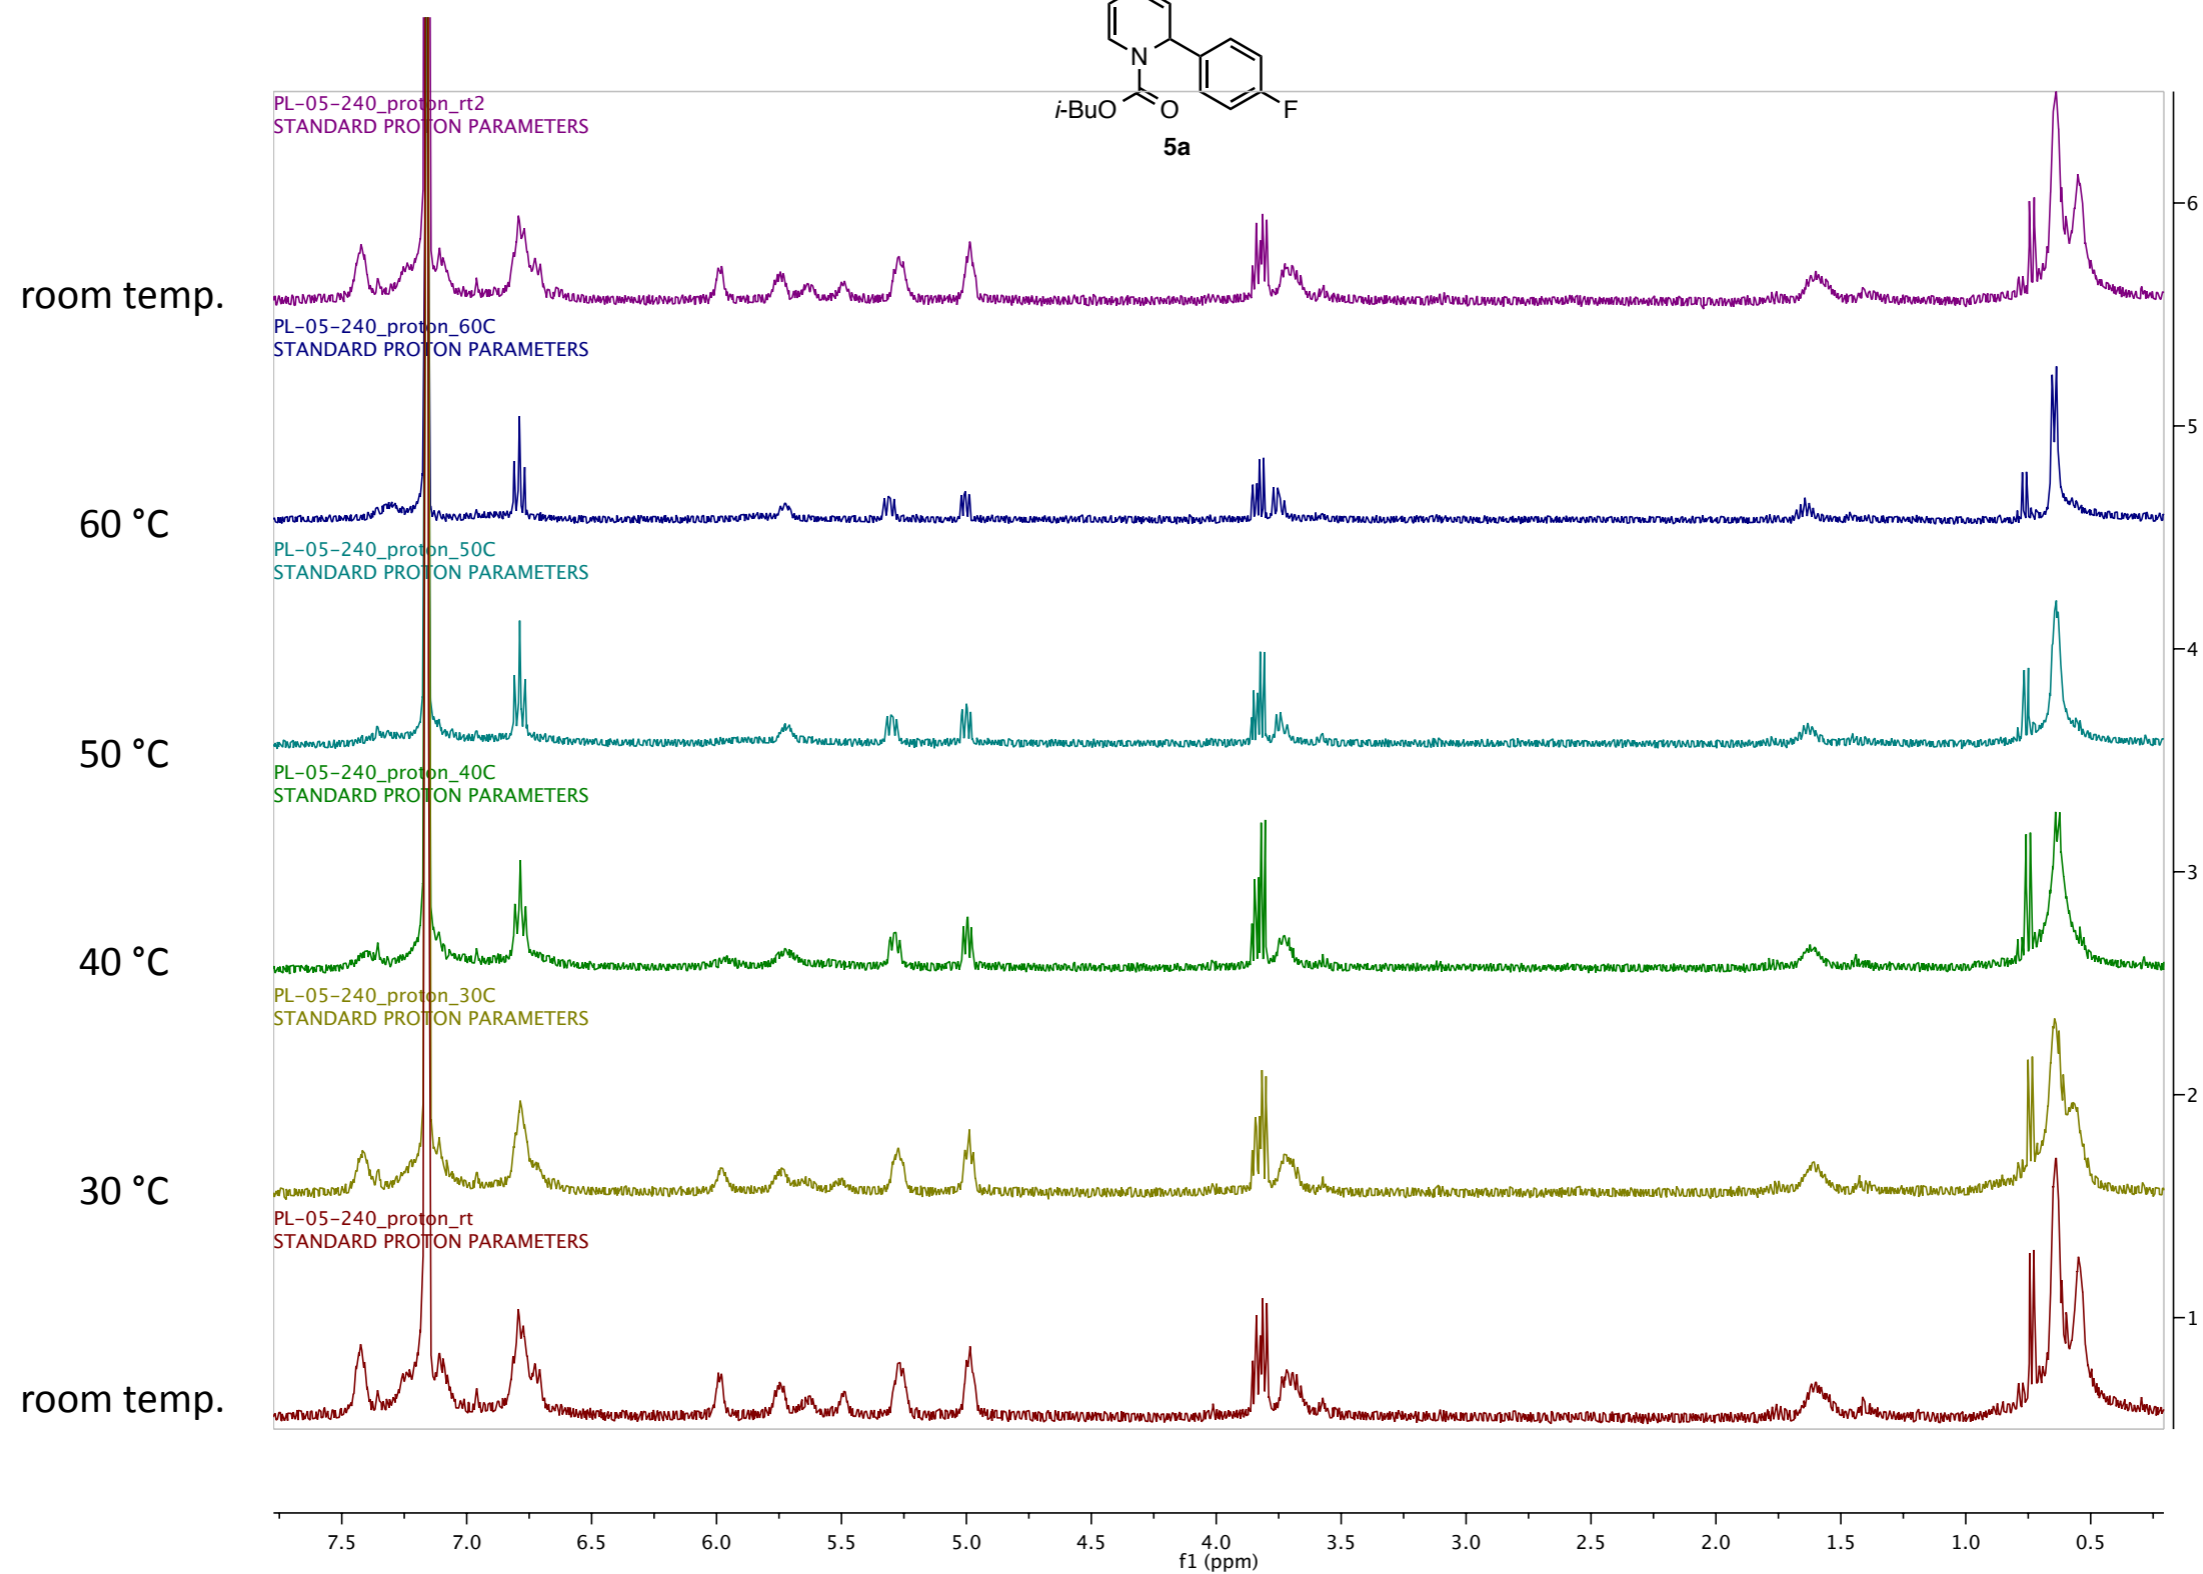

400 MHz <sup>1</sup>H-VT-NMR spectra of **5a** in  $C_6D_6$ .



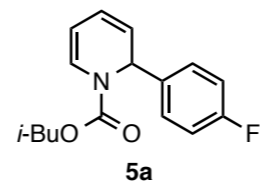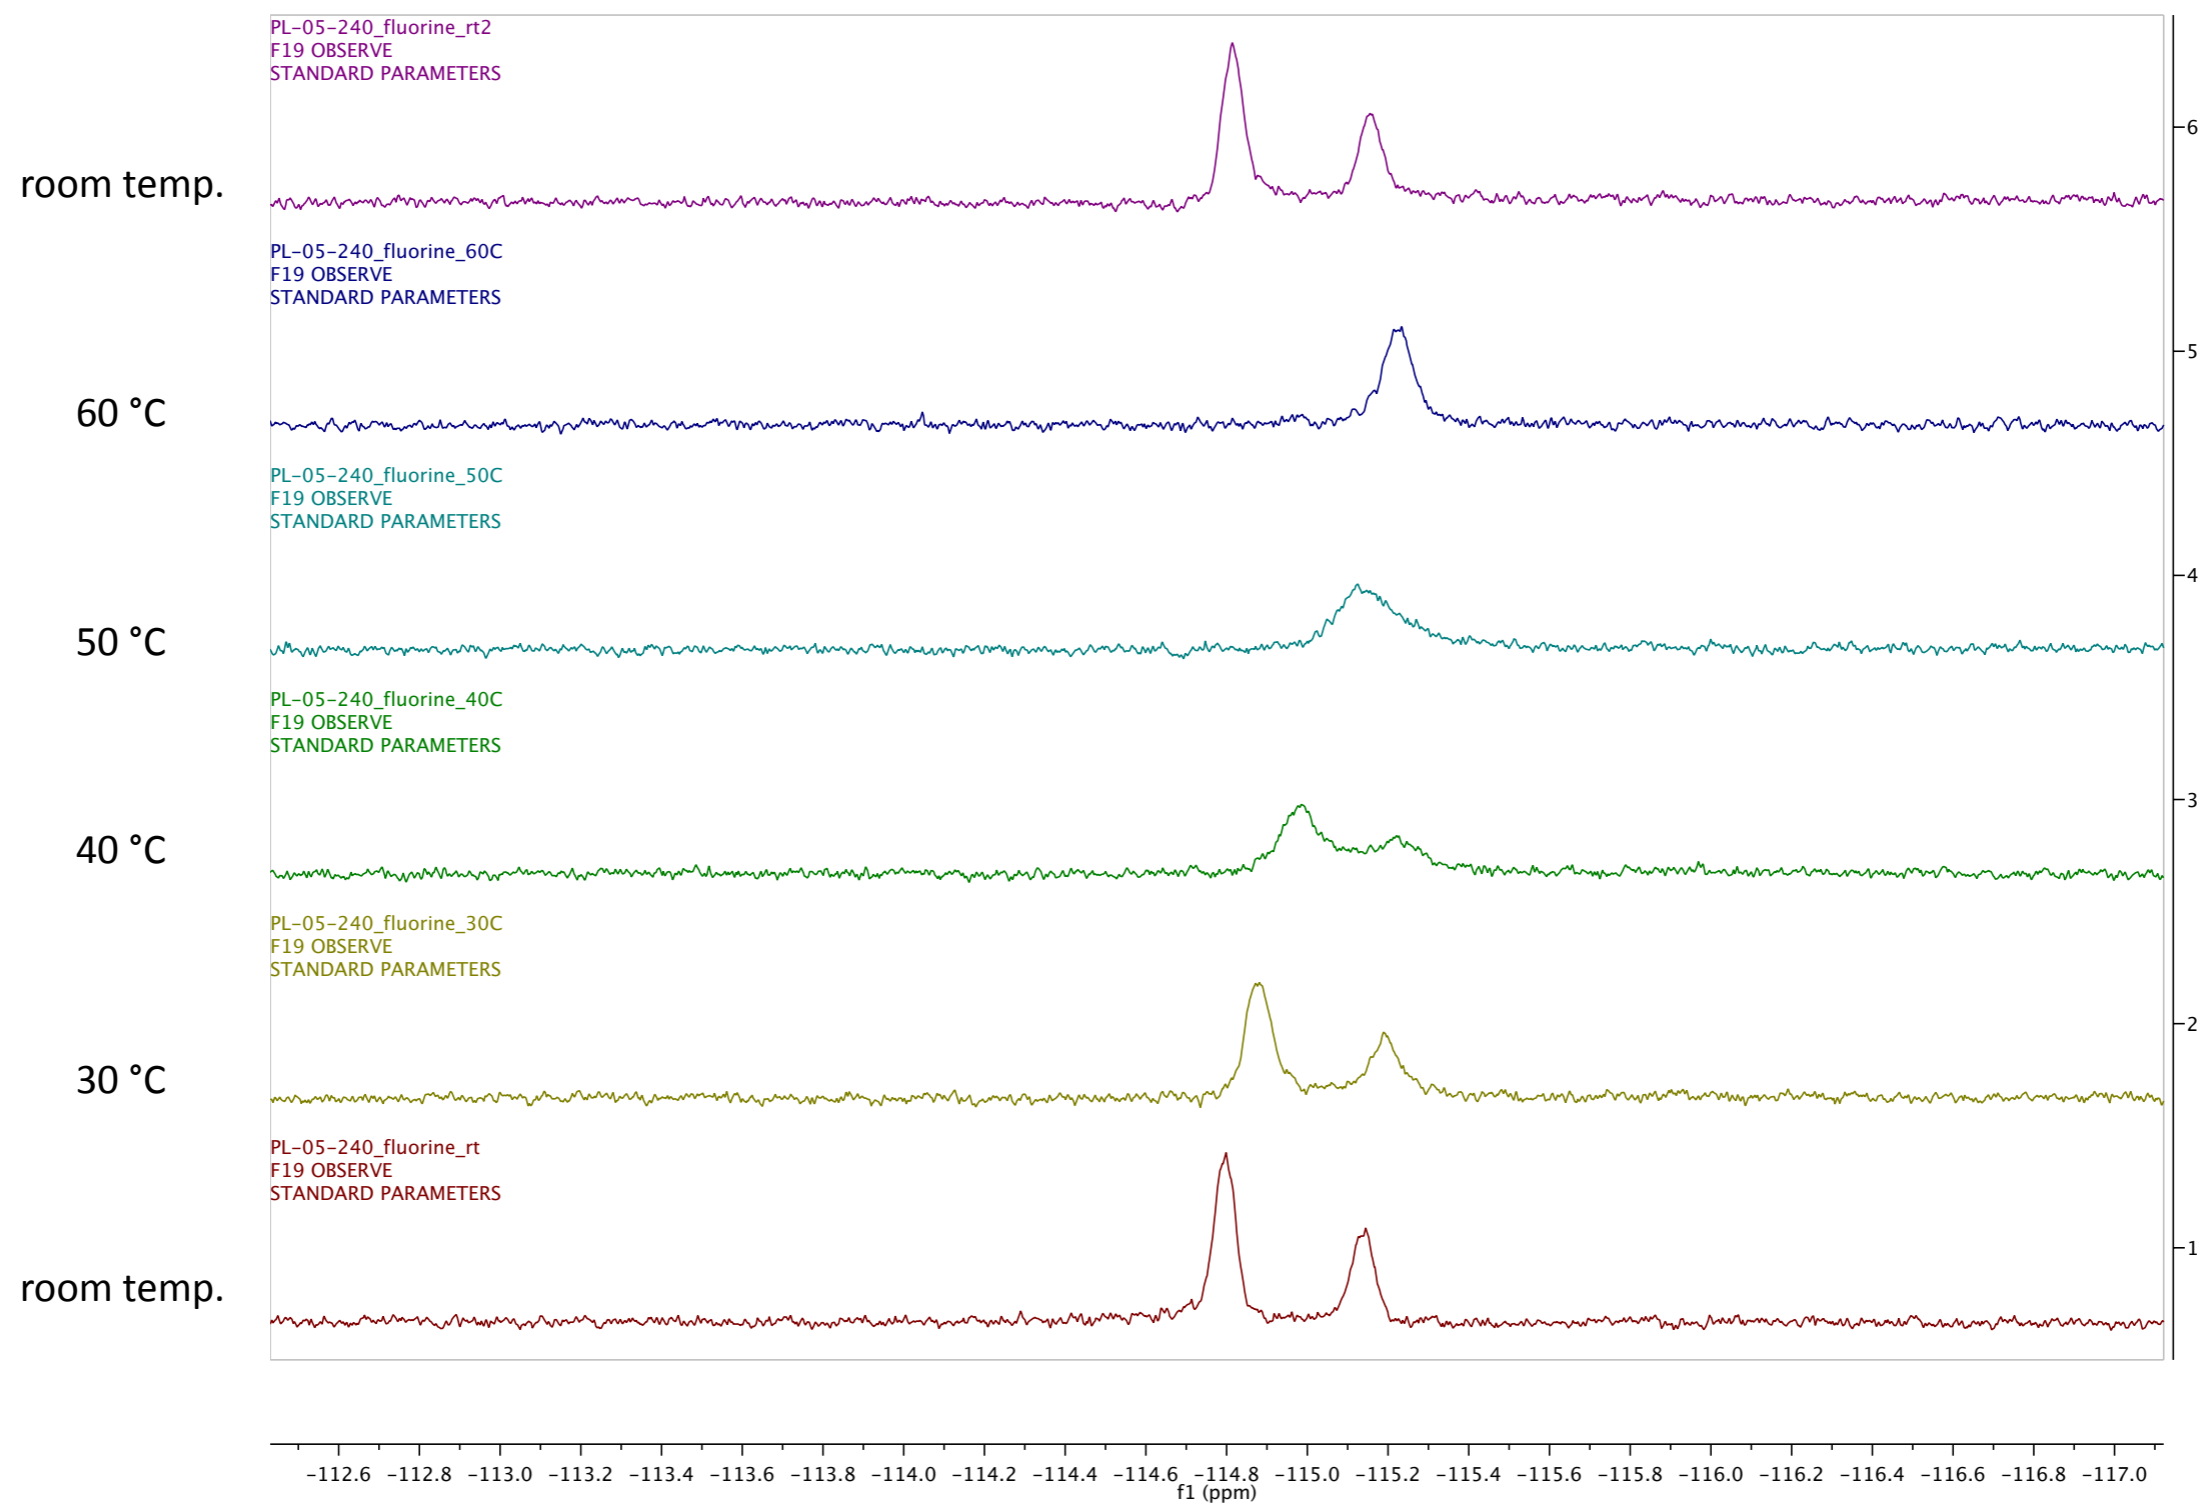

376 MHz  $^{19}\text{F}$ -VT-NMR spectra of **5a** in  $\text{C}_6\text{D}_6$ .

## VIII. Crude NMR of 5a

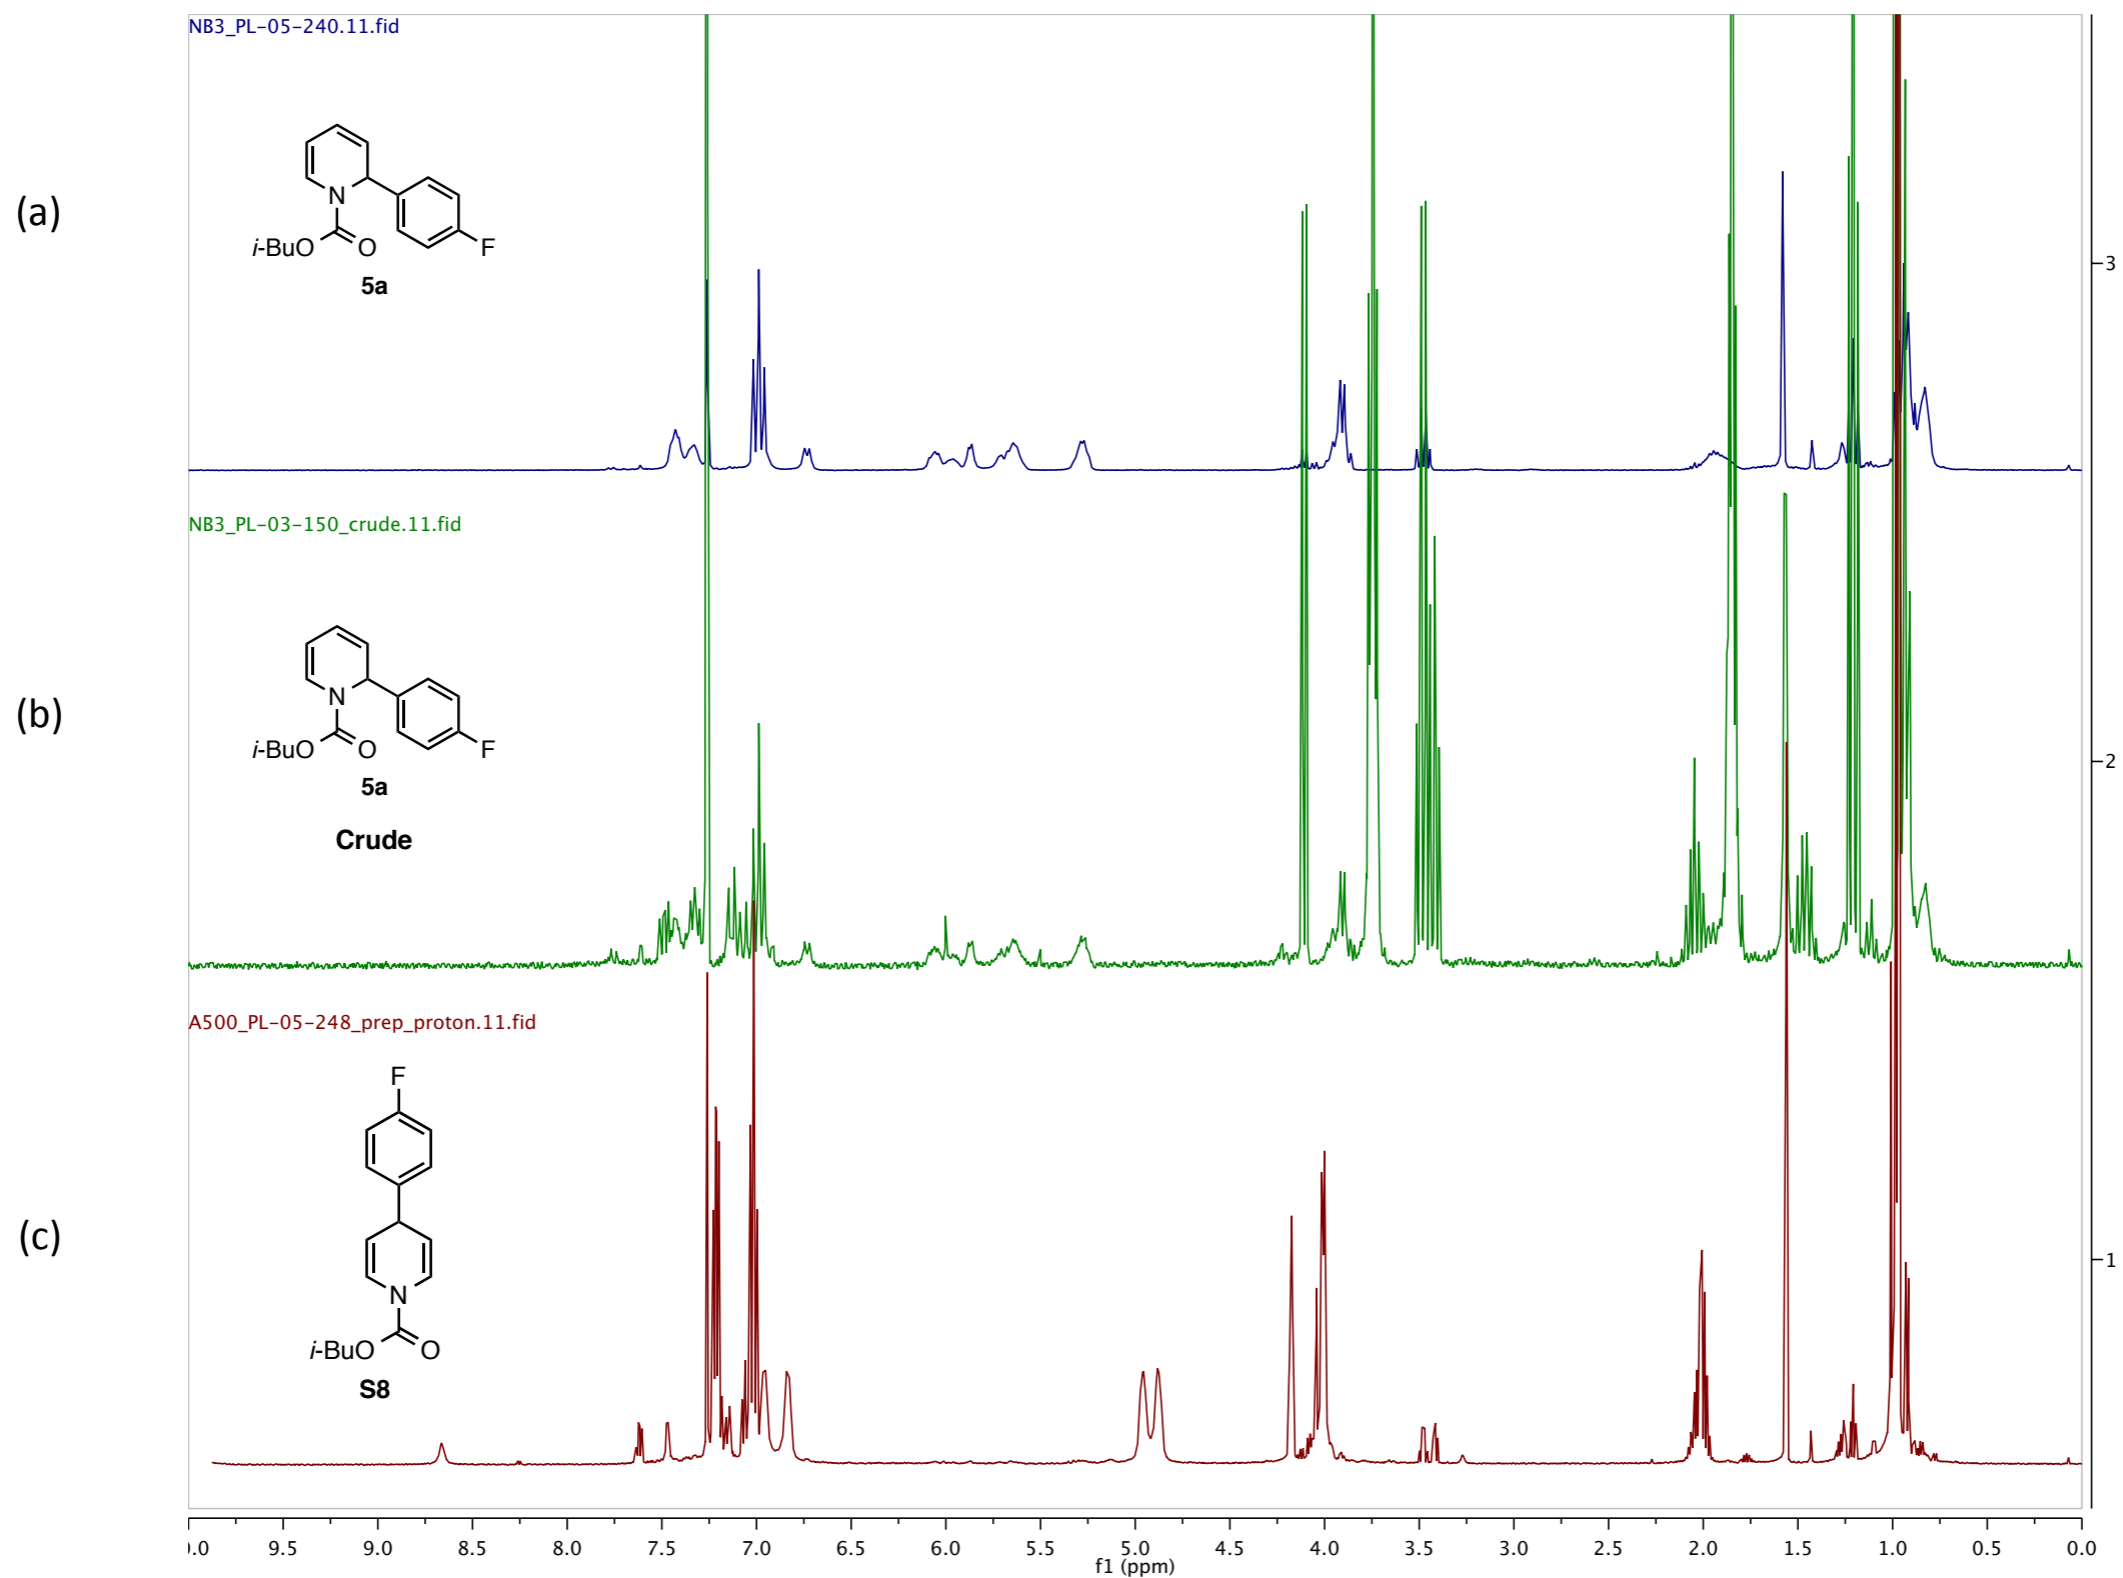

(a) 300 MHz  $^1\text{H}$ -NMR spectrum of **5a** in  $\text{CDCl}_3$ . (b) 300 MHz  $^1\text{H}$ -NMR spectrum of crude **5a** in  $\text{CDCl}_3$ . (c) 500 MHz  $^1\text{H}$ -NMR spectrum of **S8** in  $\text{CDCl}_3$ .

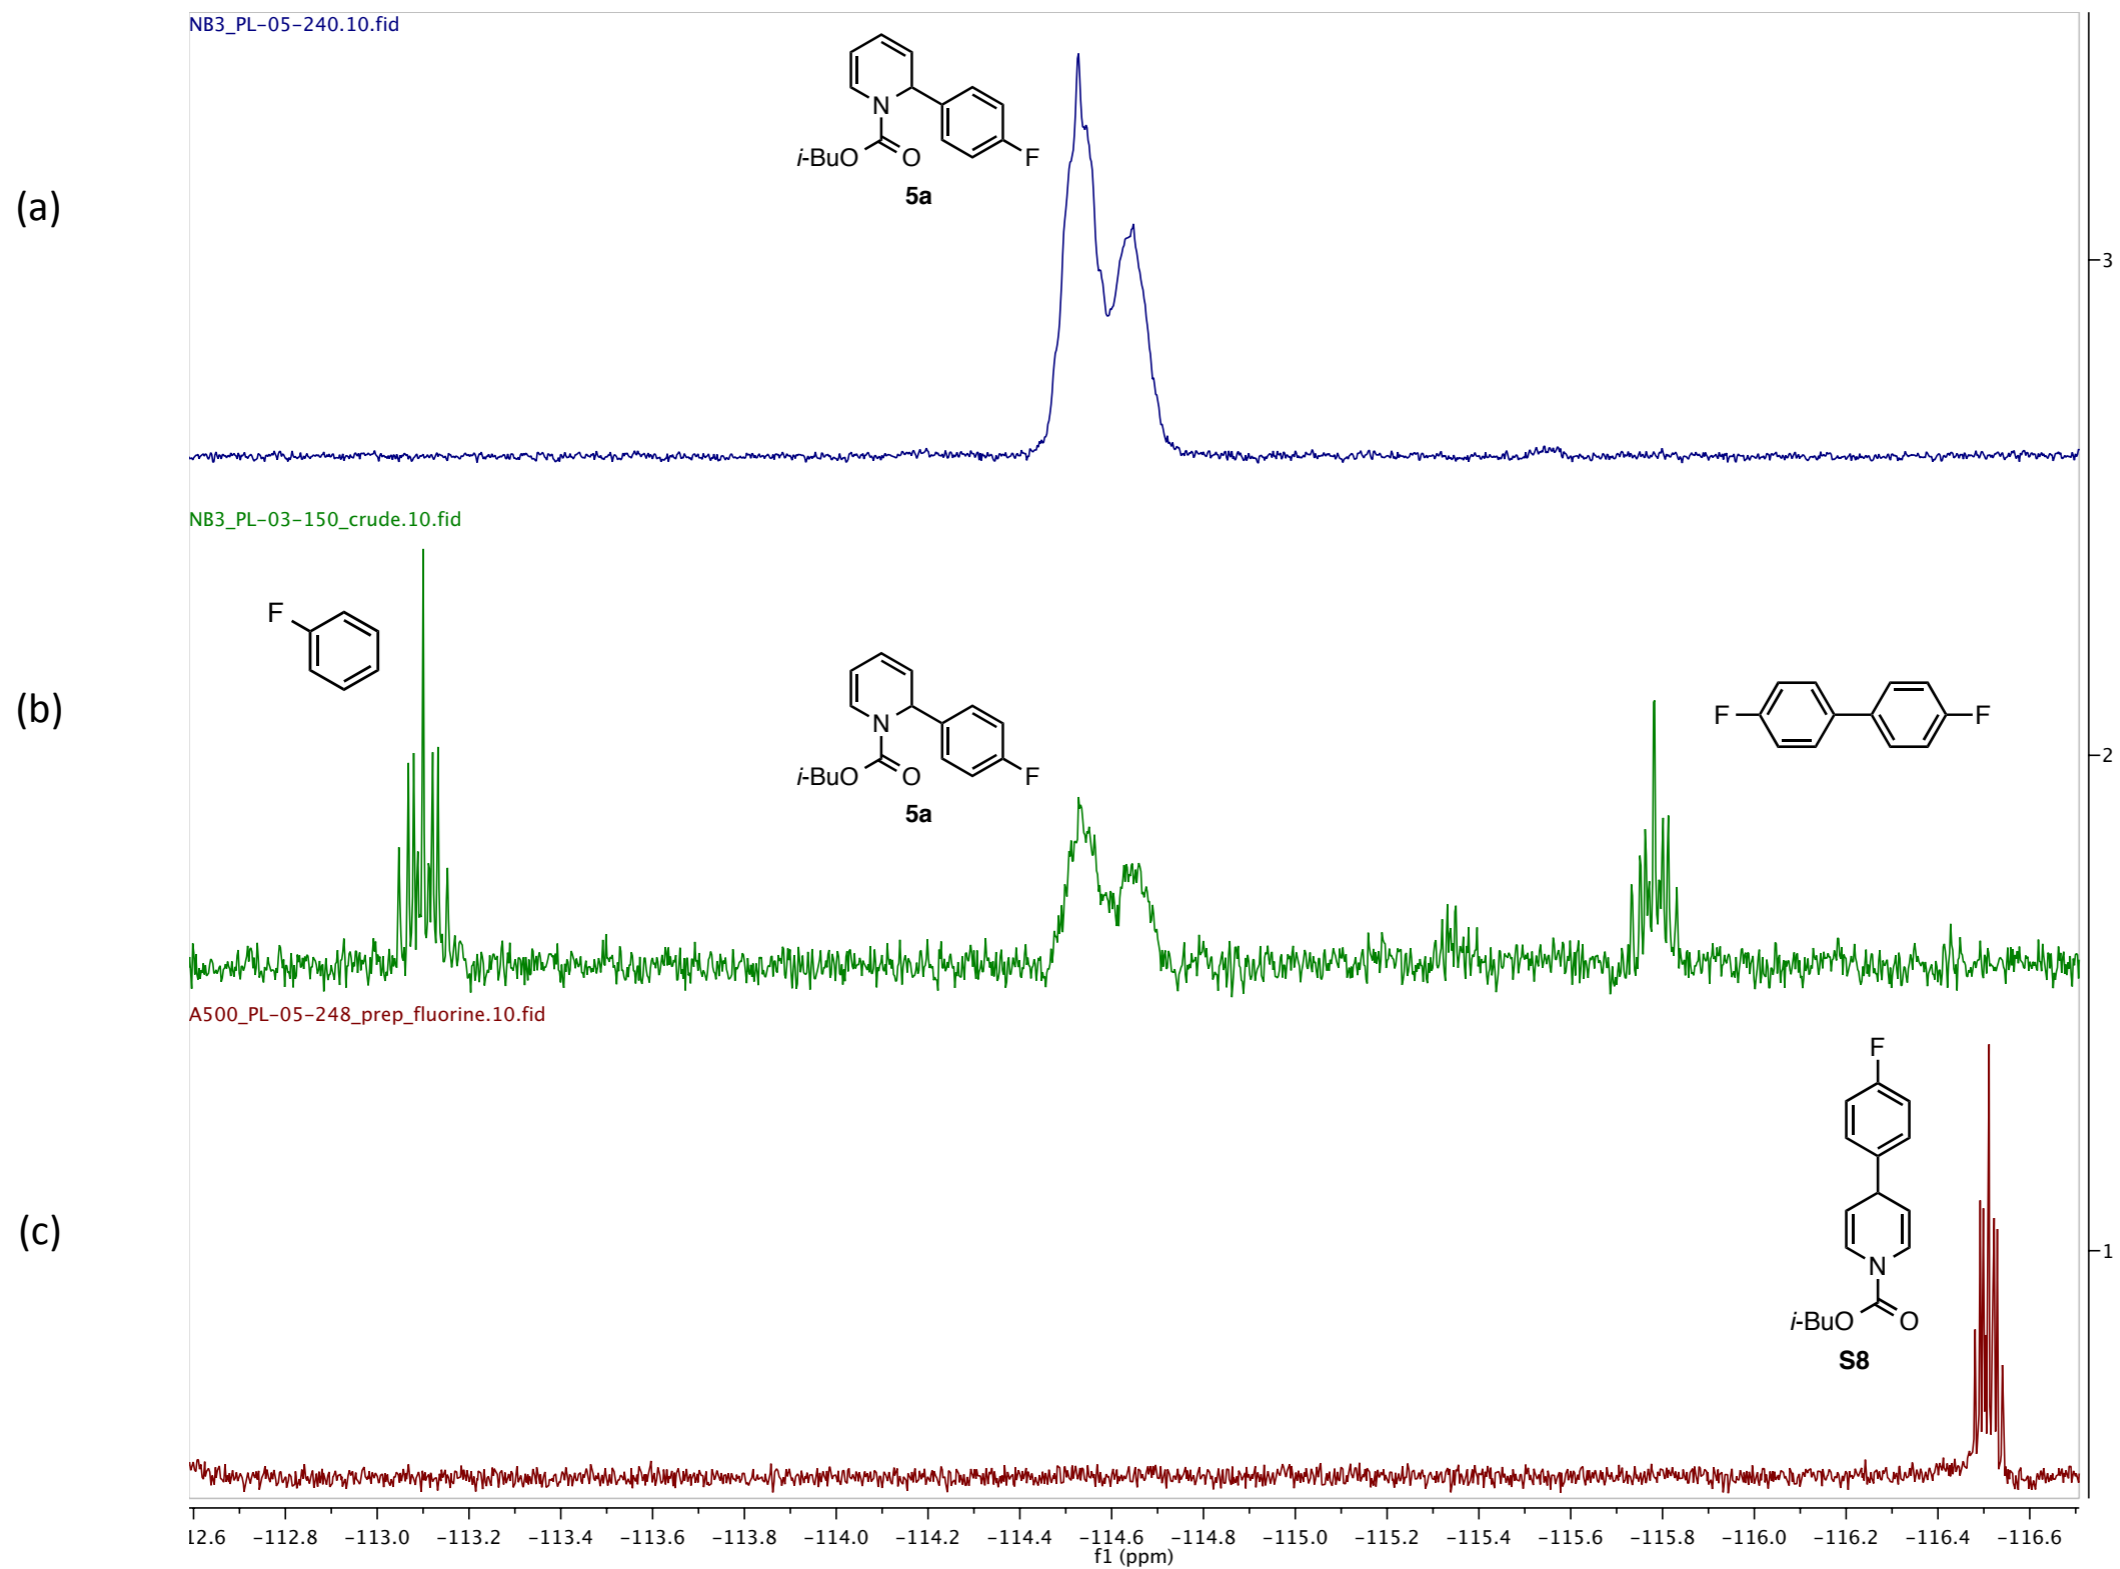

(a) 282 MHz  $^{19}\text{F}$ -NMR spectrum of **5a** in  $\text{CDCl}_3$ . (b) 282 MHz  $^{19}\text{F}$ -NMR spectrum of crude **5a** in  $\text{CDCl}_3$ . (c) 470 MHz  $^{19}\text{F}$ -NMR spectrum of **S8** in  $\text{CDCl}_3$ .

# IX. NMR Spectra

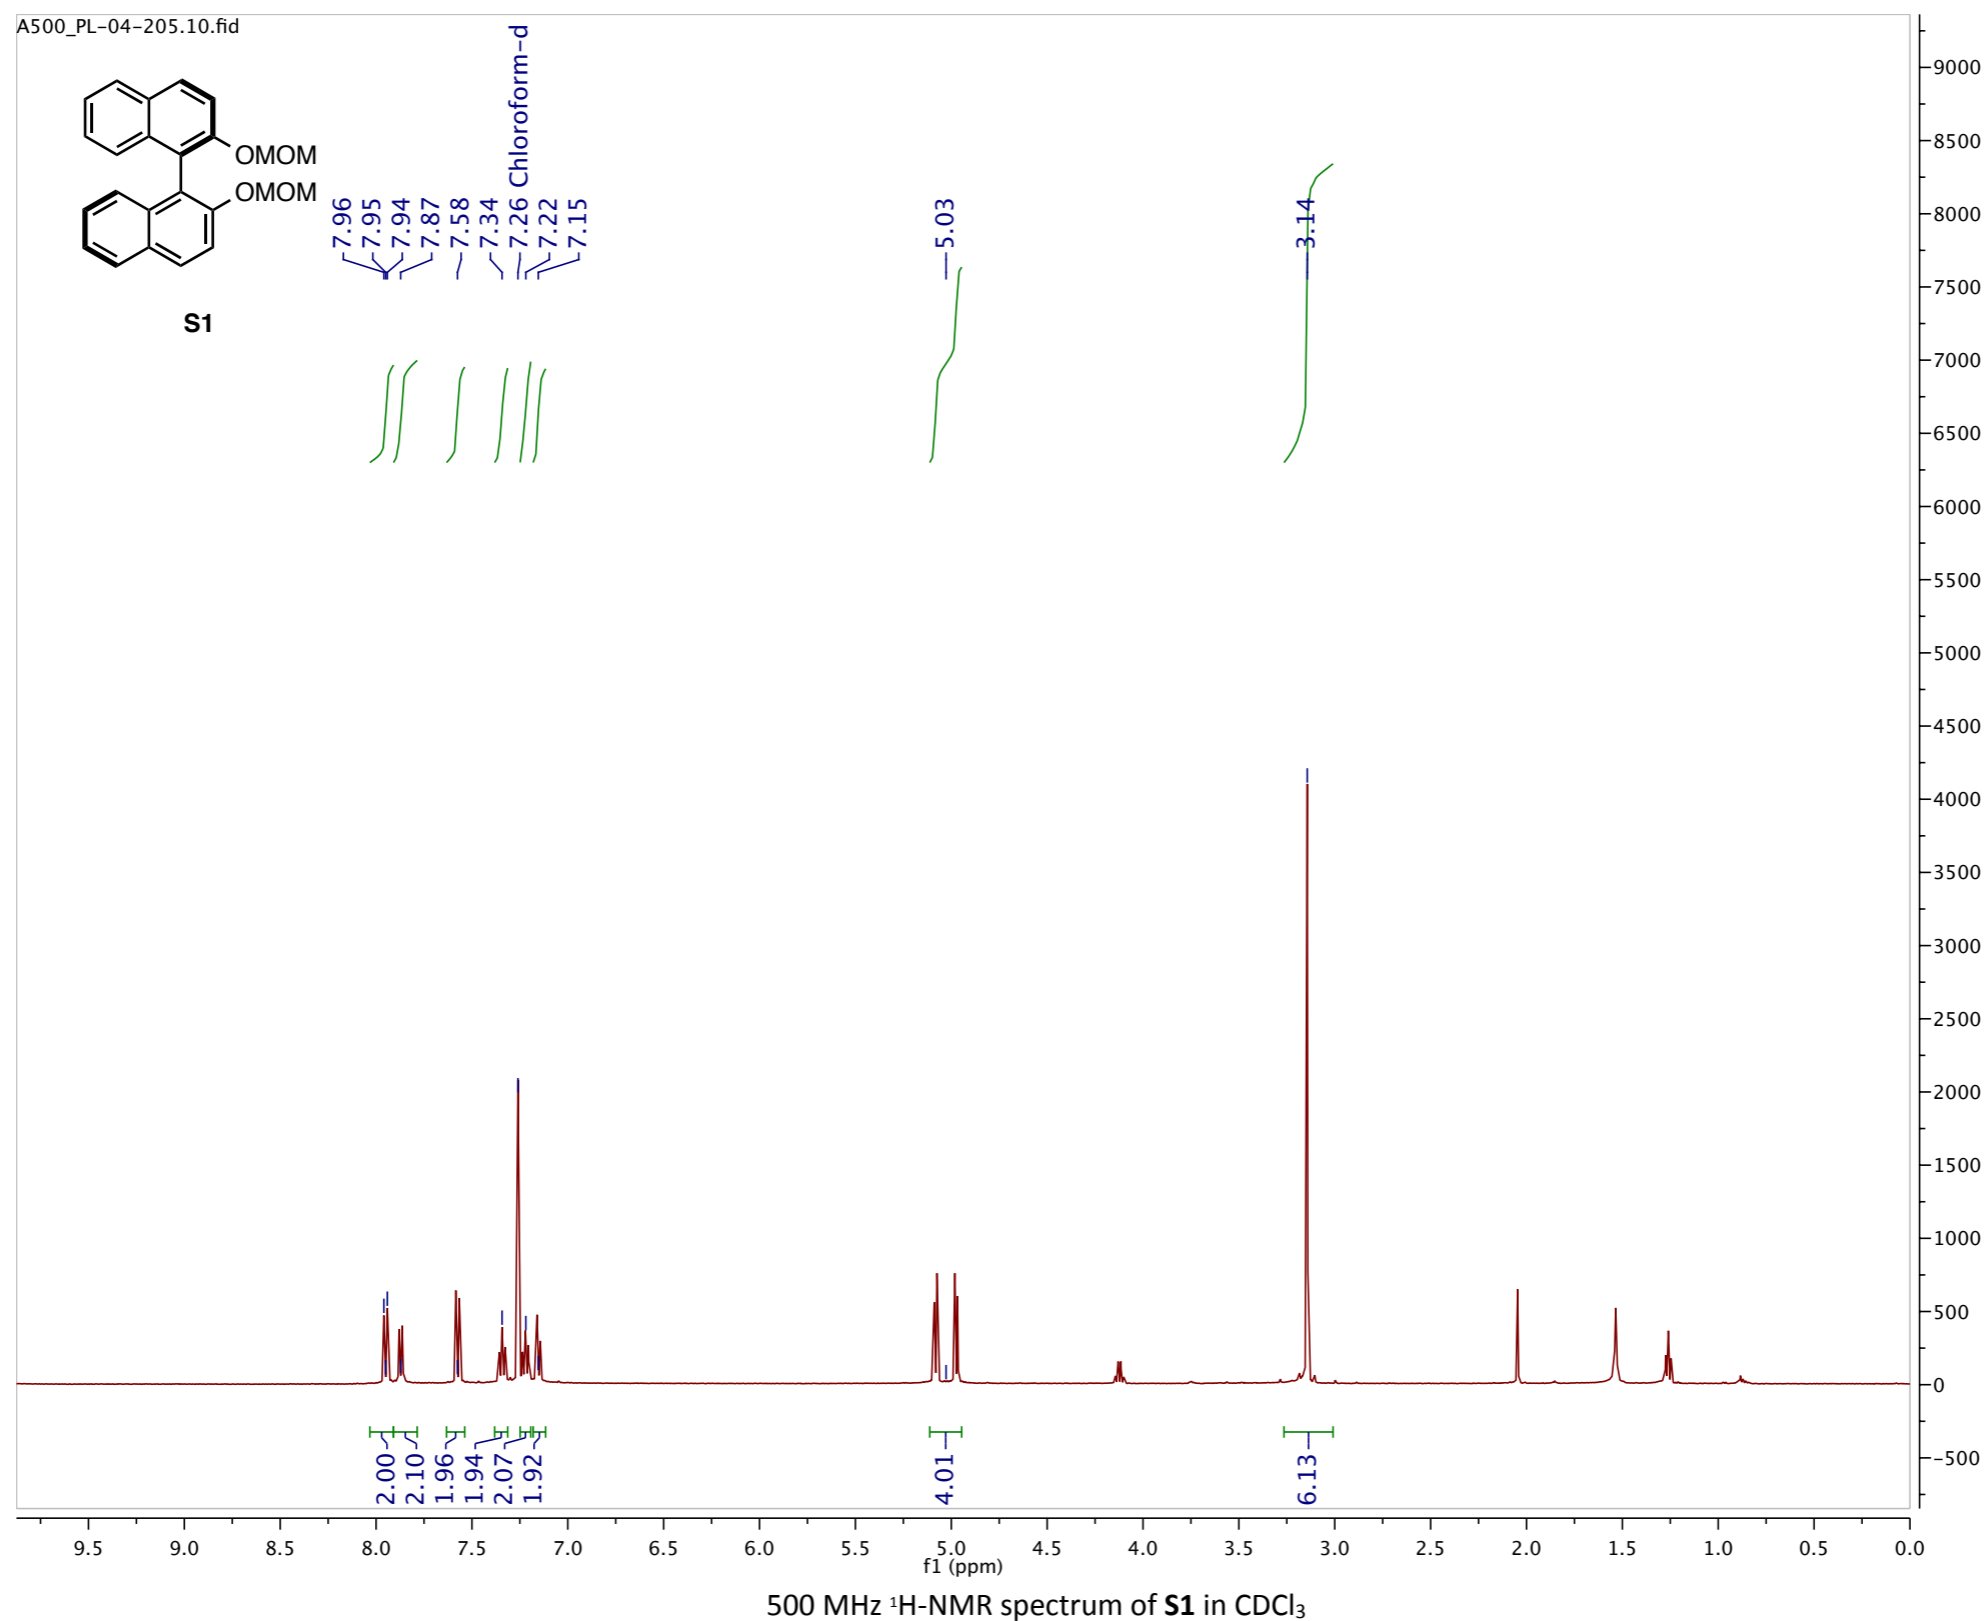

NB3\_PL-02-127.10.fid

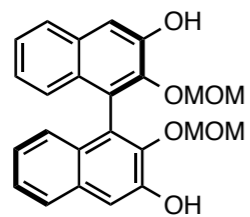

S2

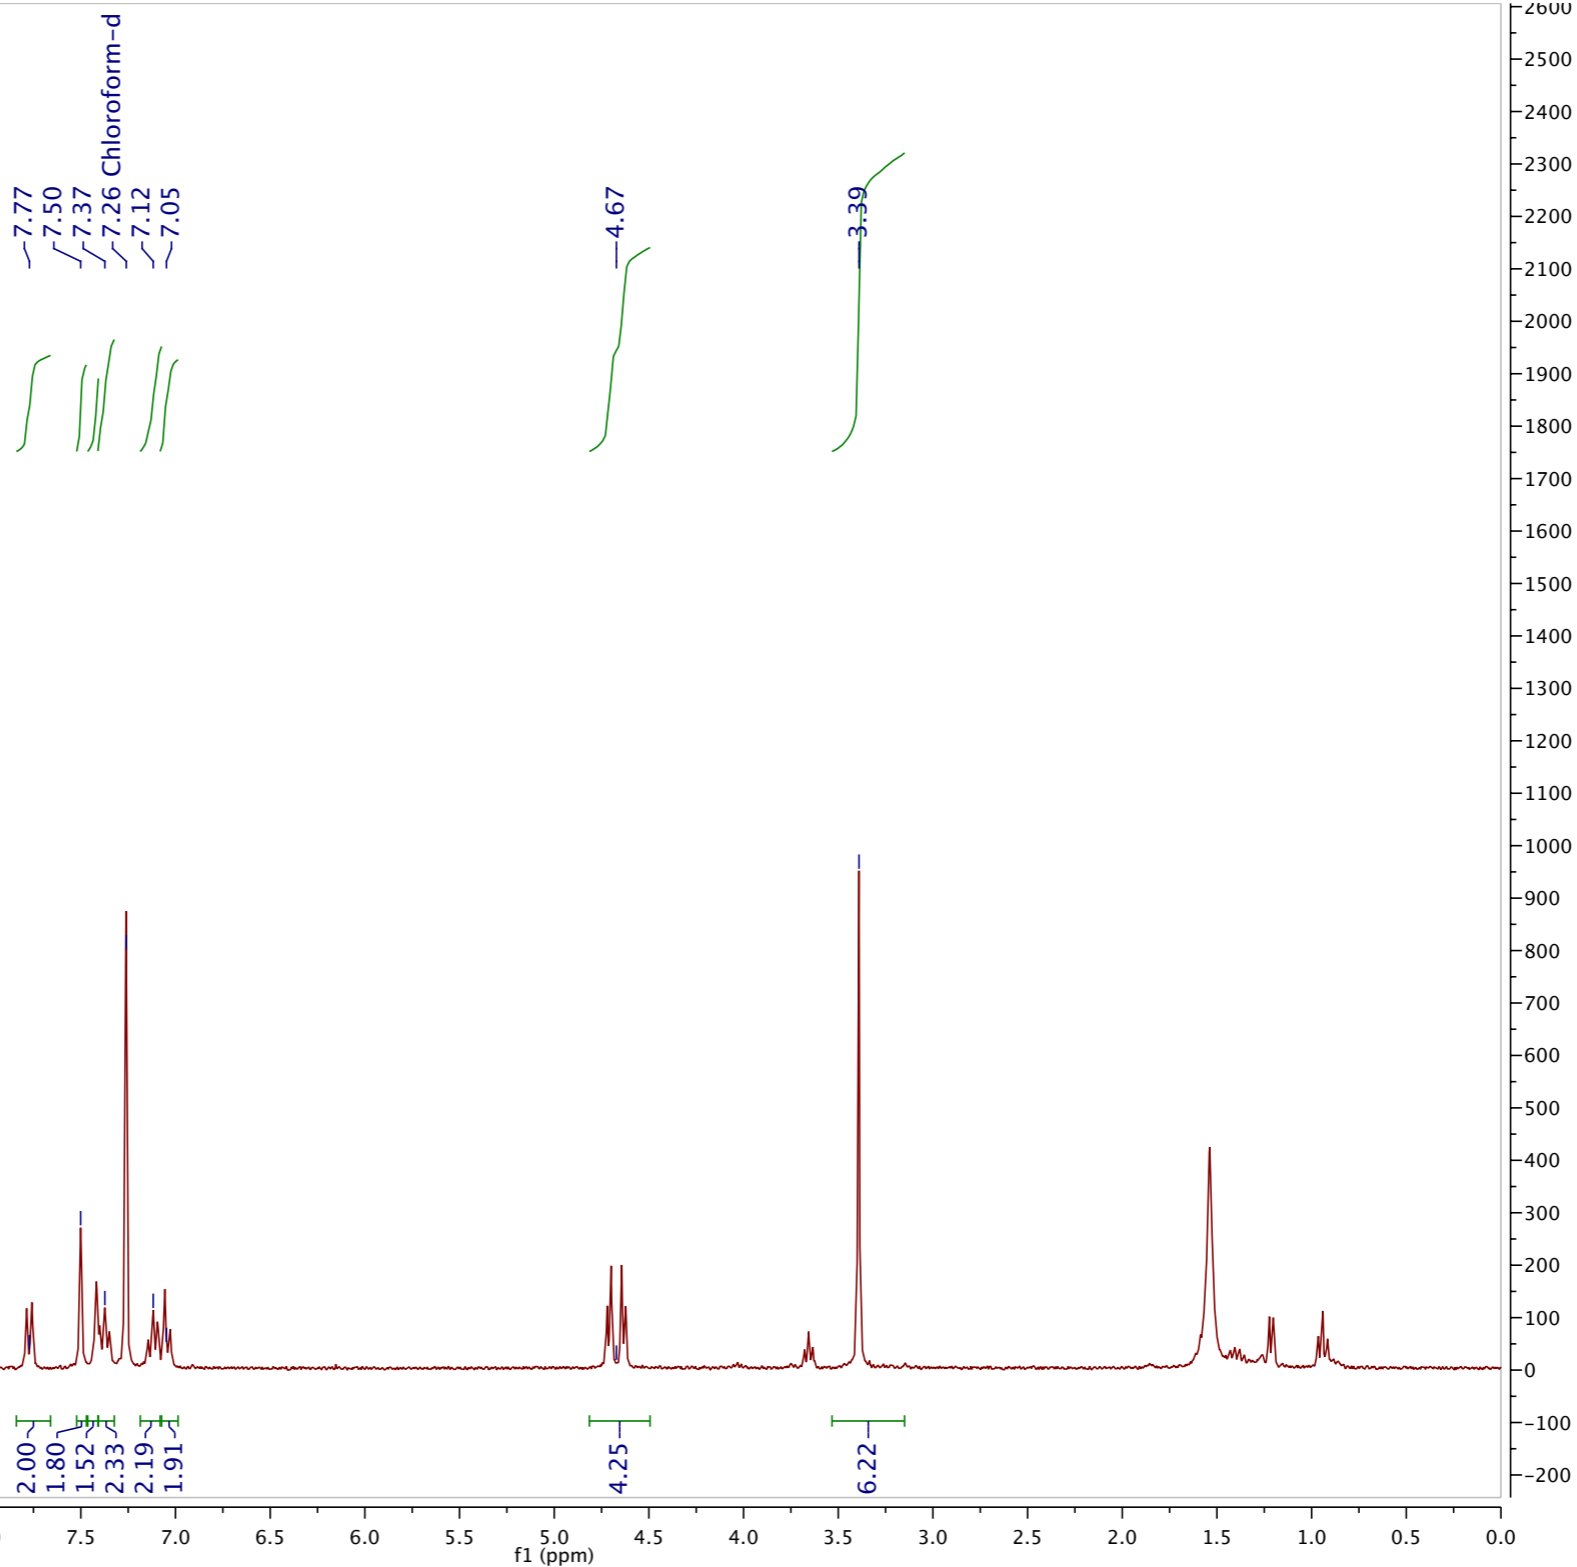

300 MHz <sup>1</sup>H-NMR spectrum of crude S2 in CDCl<sub>3</sub>

NB3\_PL-04-208\_crude.10.fid

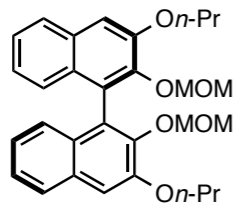

**S3**

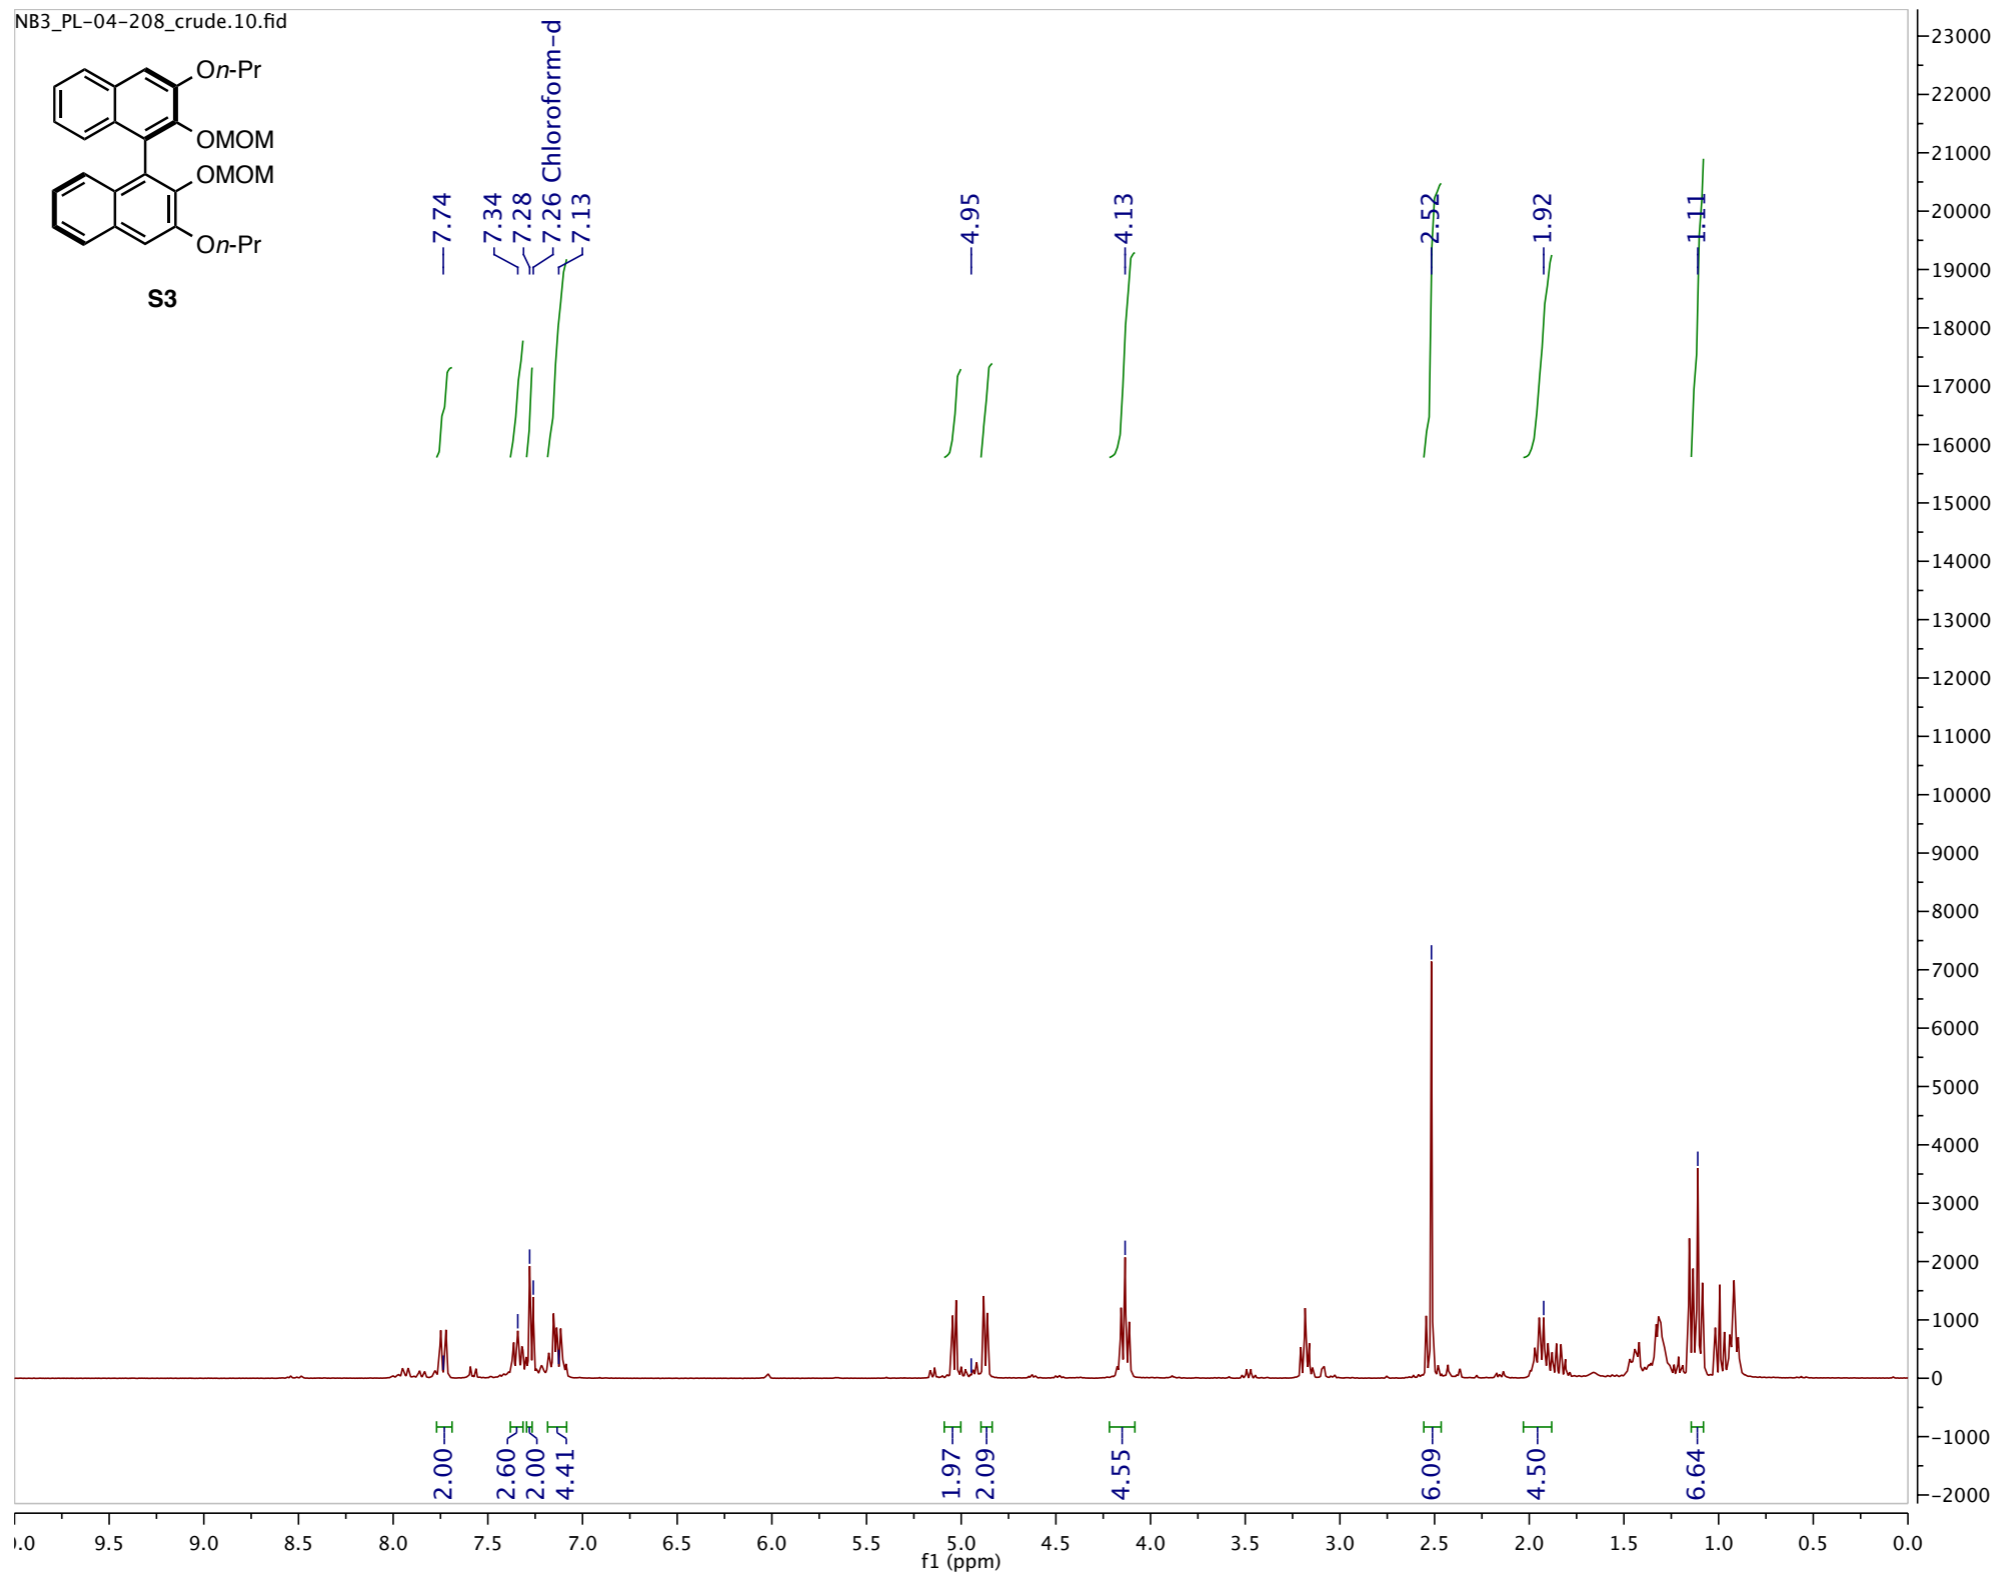

300 MHz <sup>1</sup>H-NMR spectrum of crude **S3** in CDCl<sub>3</sub>

A500\_JZE-1-009-pure.10.fid

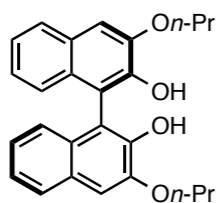

**S4**

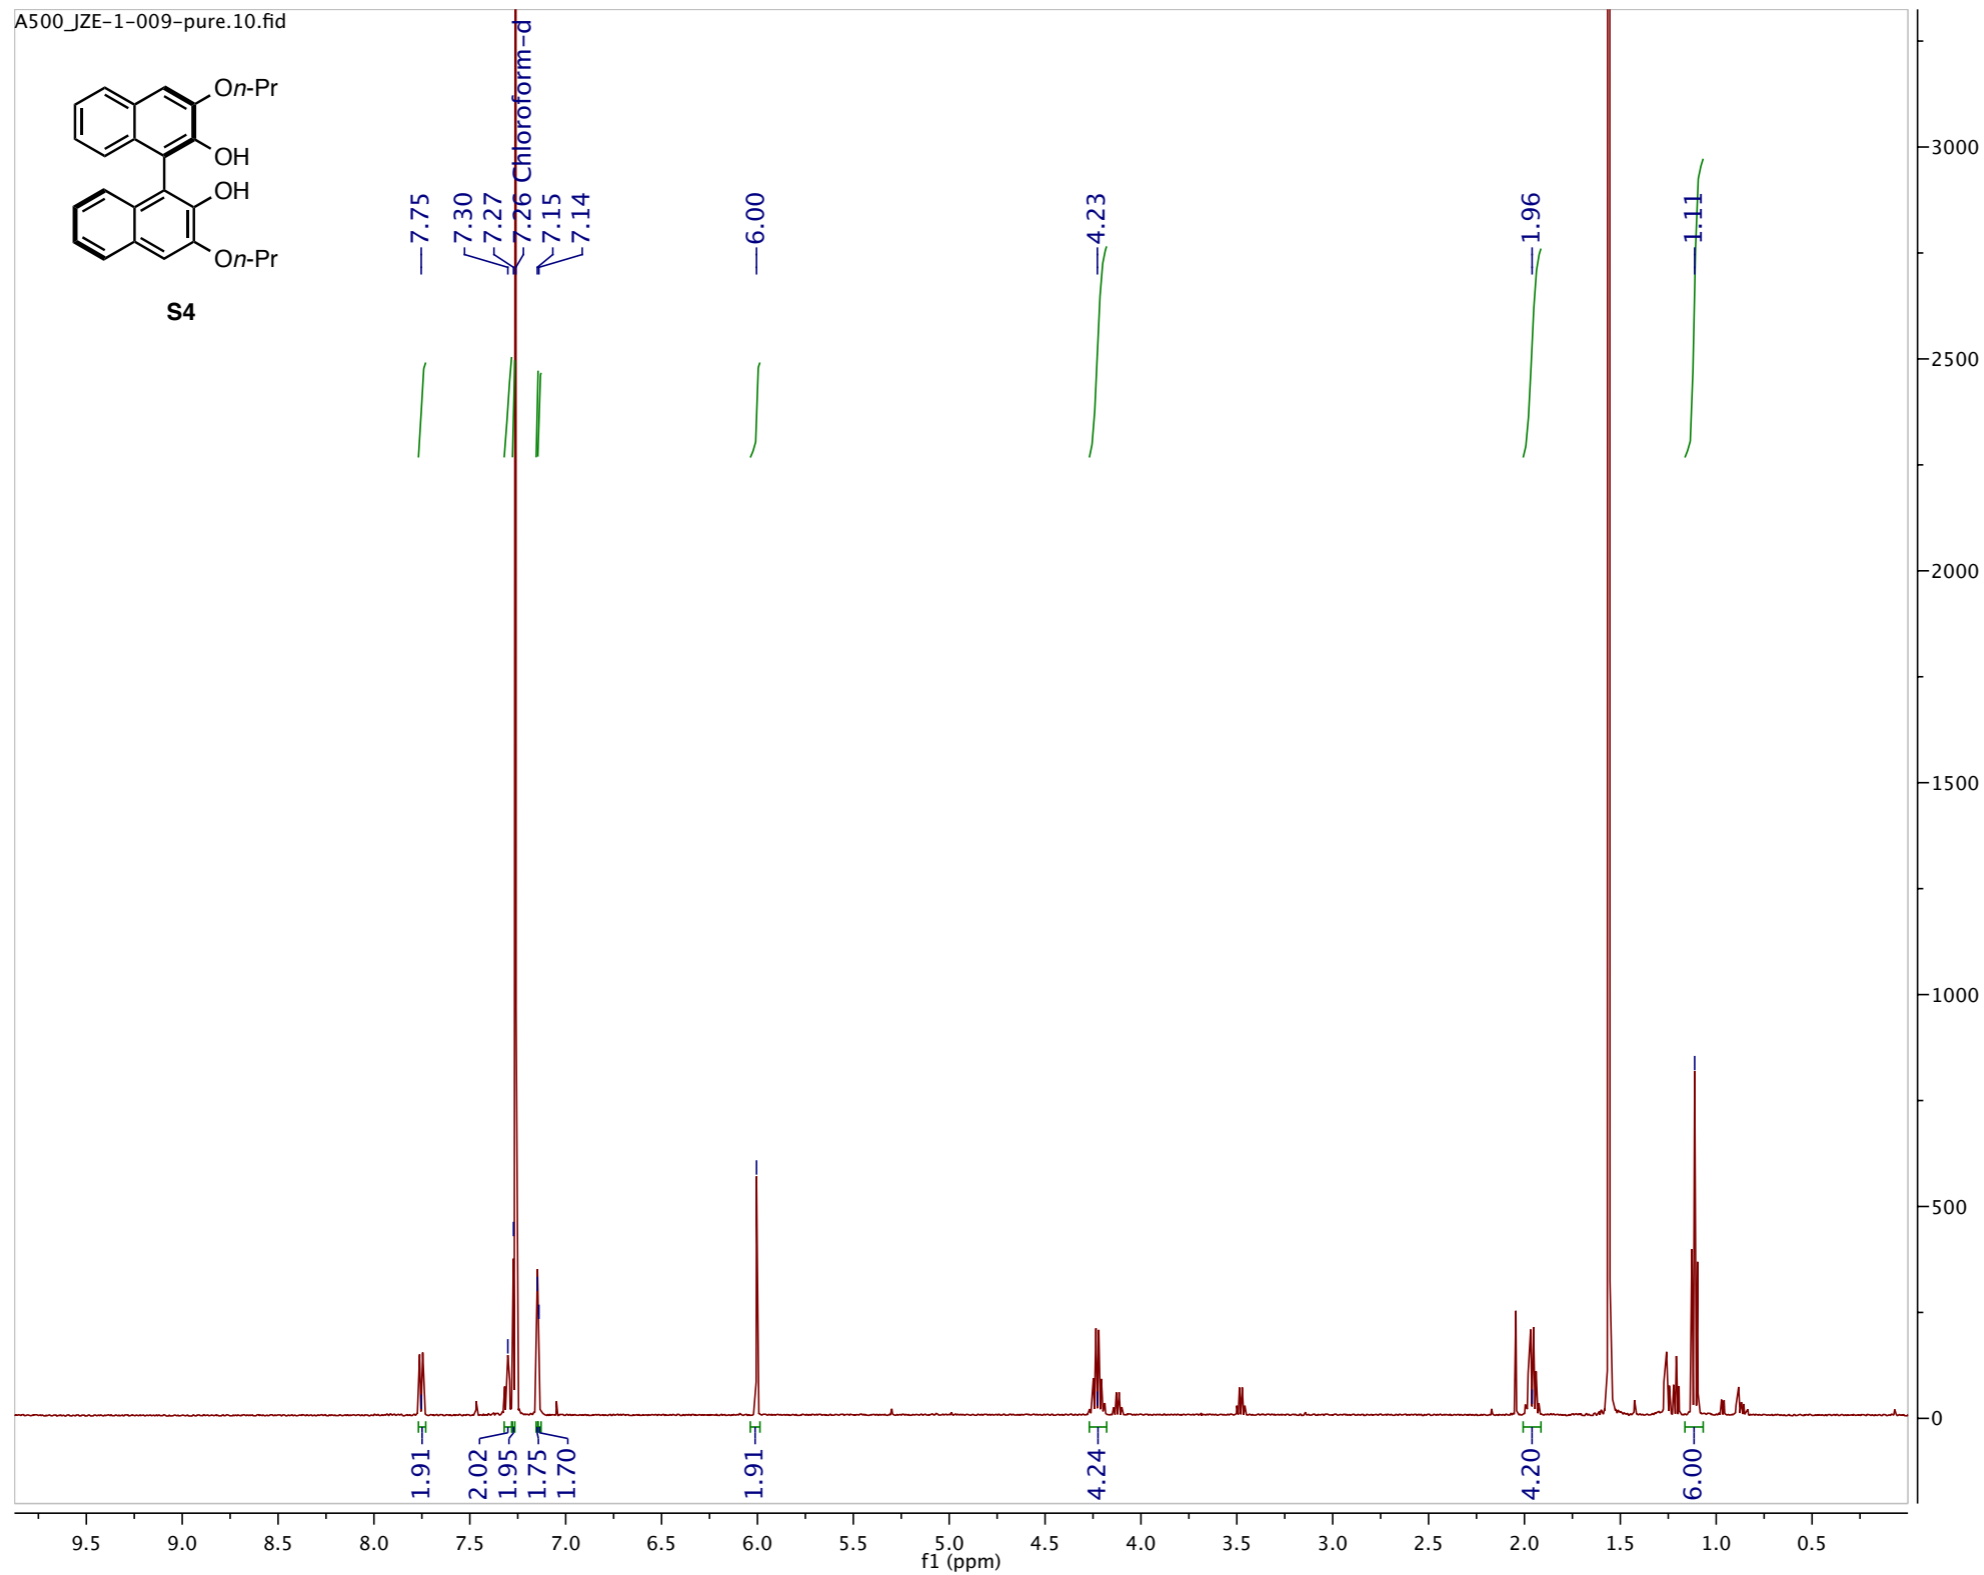

500 MHz  $^1\text{H}$ -NMR spectrum of **S4** in  $\text{CDCl}_3$

A500\_PL-05-082\_crude.11.fid

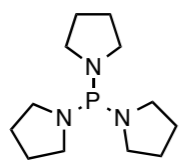

S5

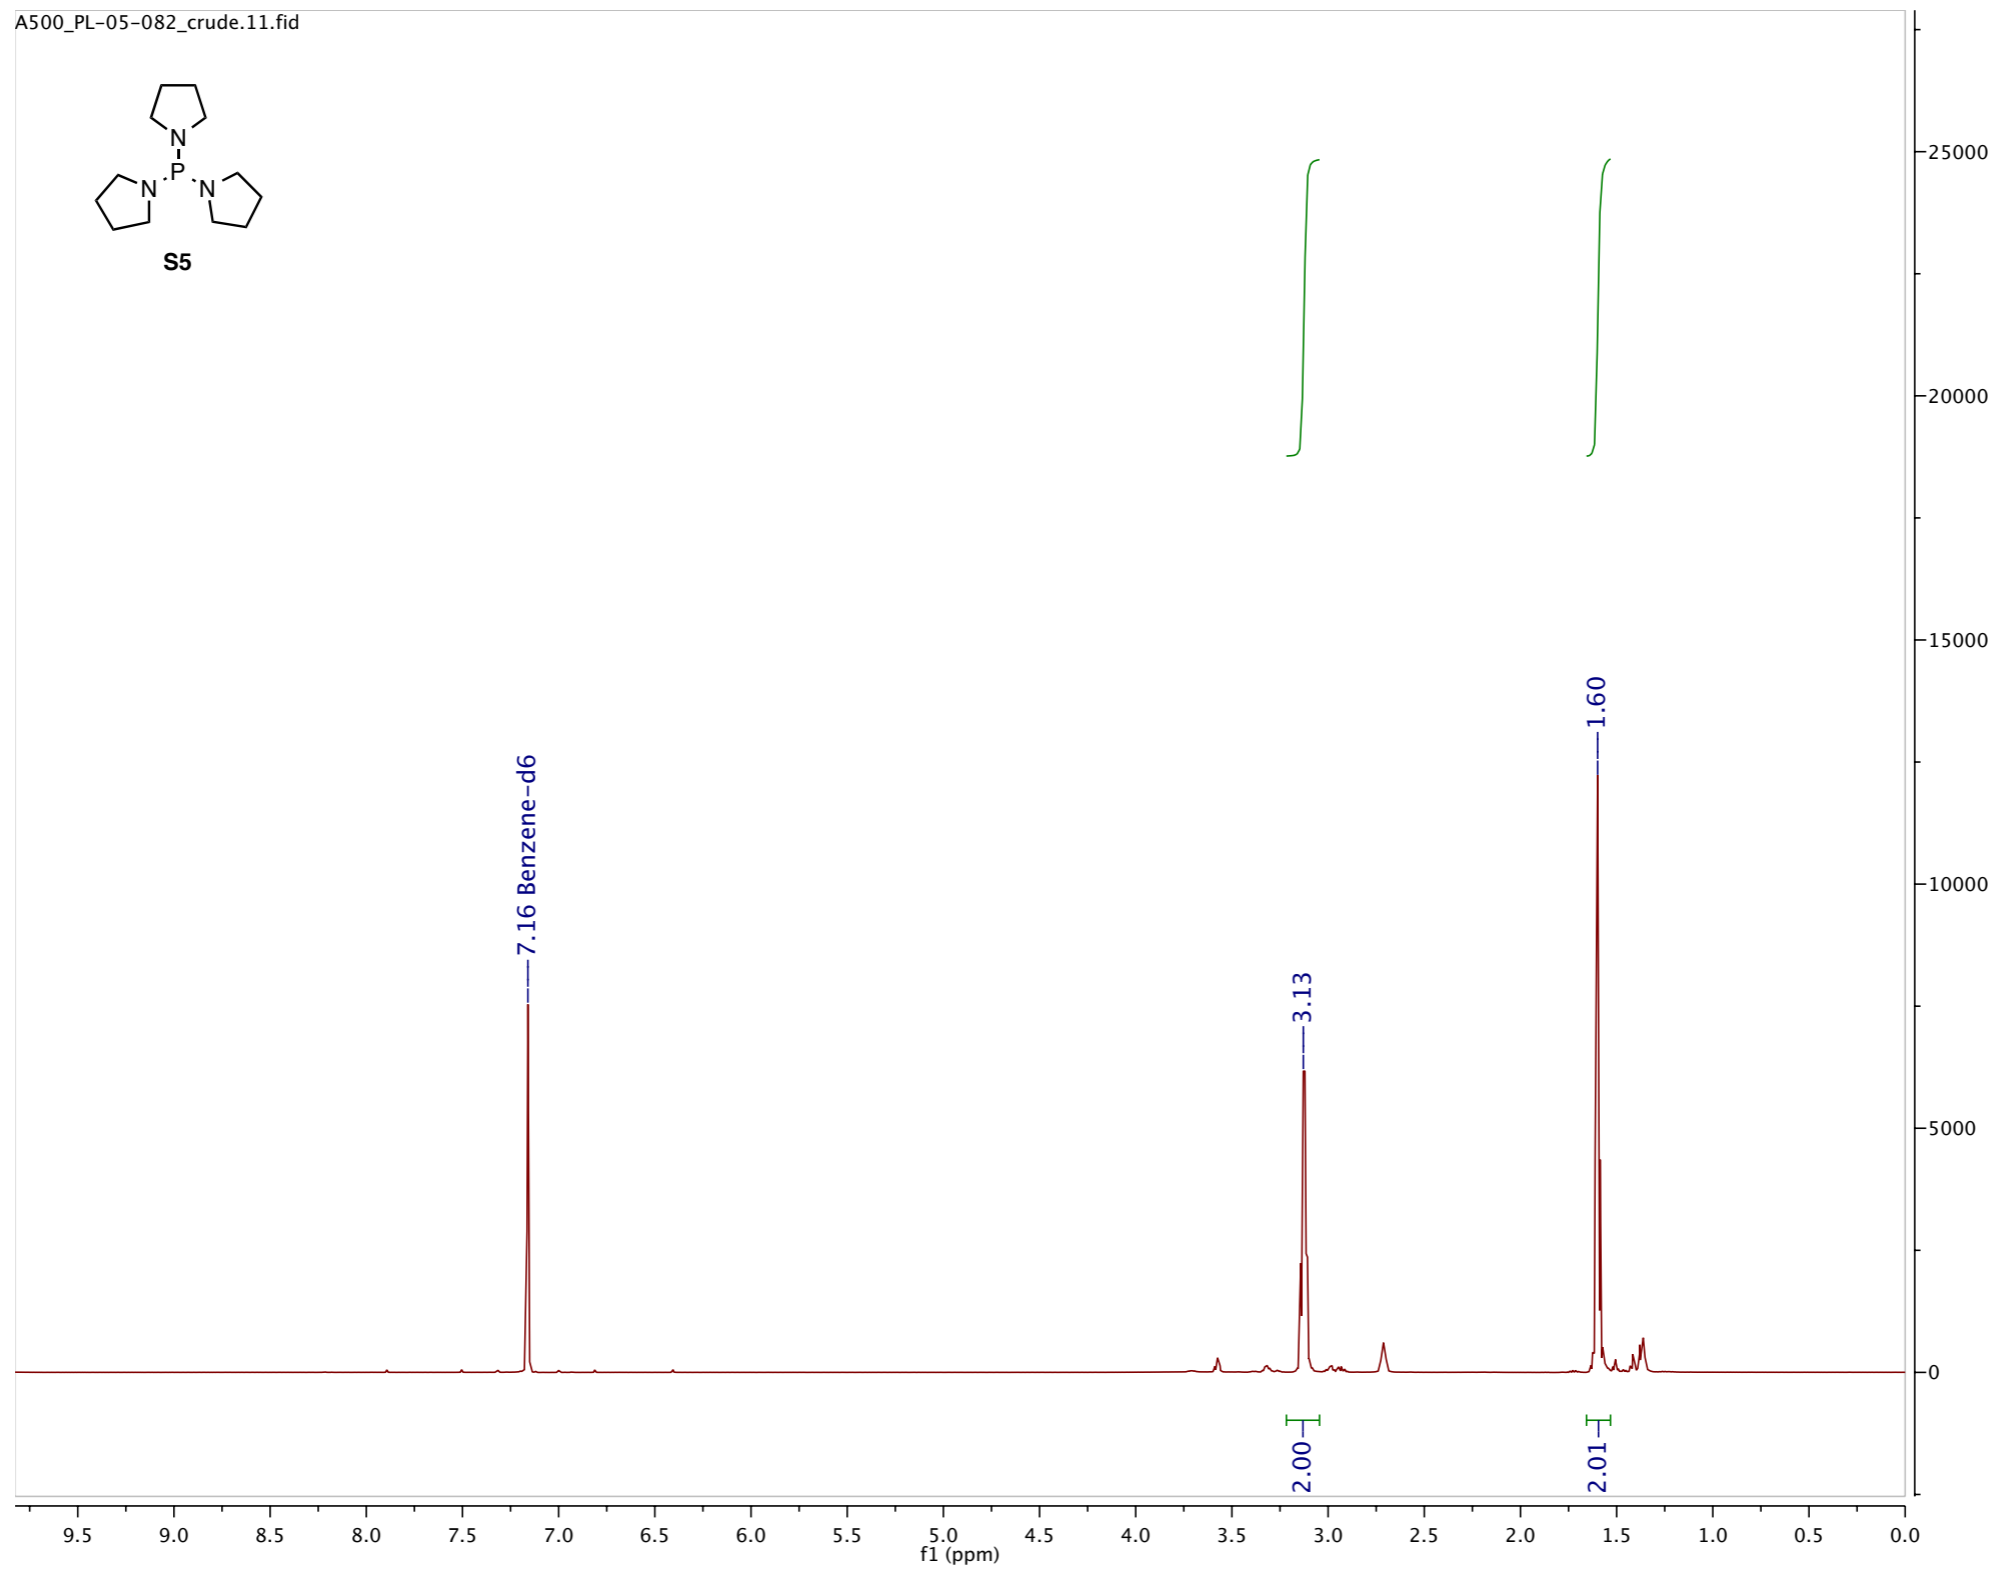

500 MHz <sup>1</sup>H-NMR spectrum of crude S5 in C<sub>6</sub>D<sub>6</sub>



A500\_PL-05-082\_crude.10.fid



**S5**

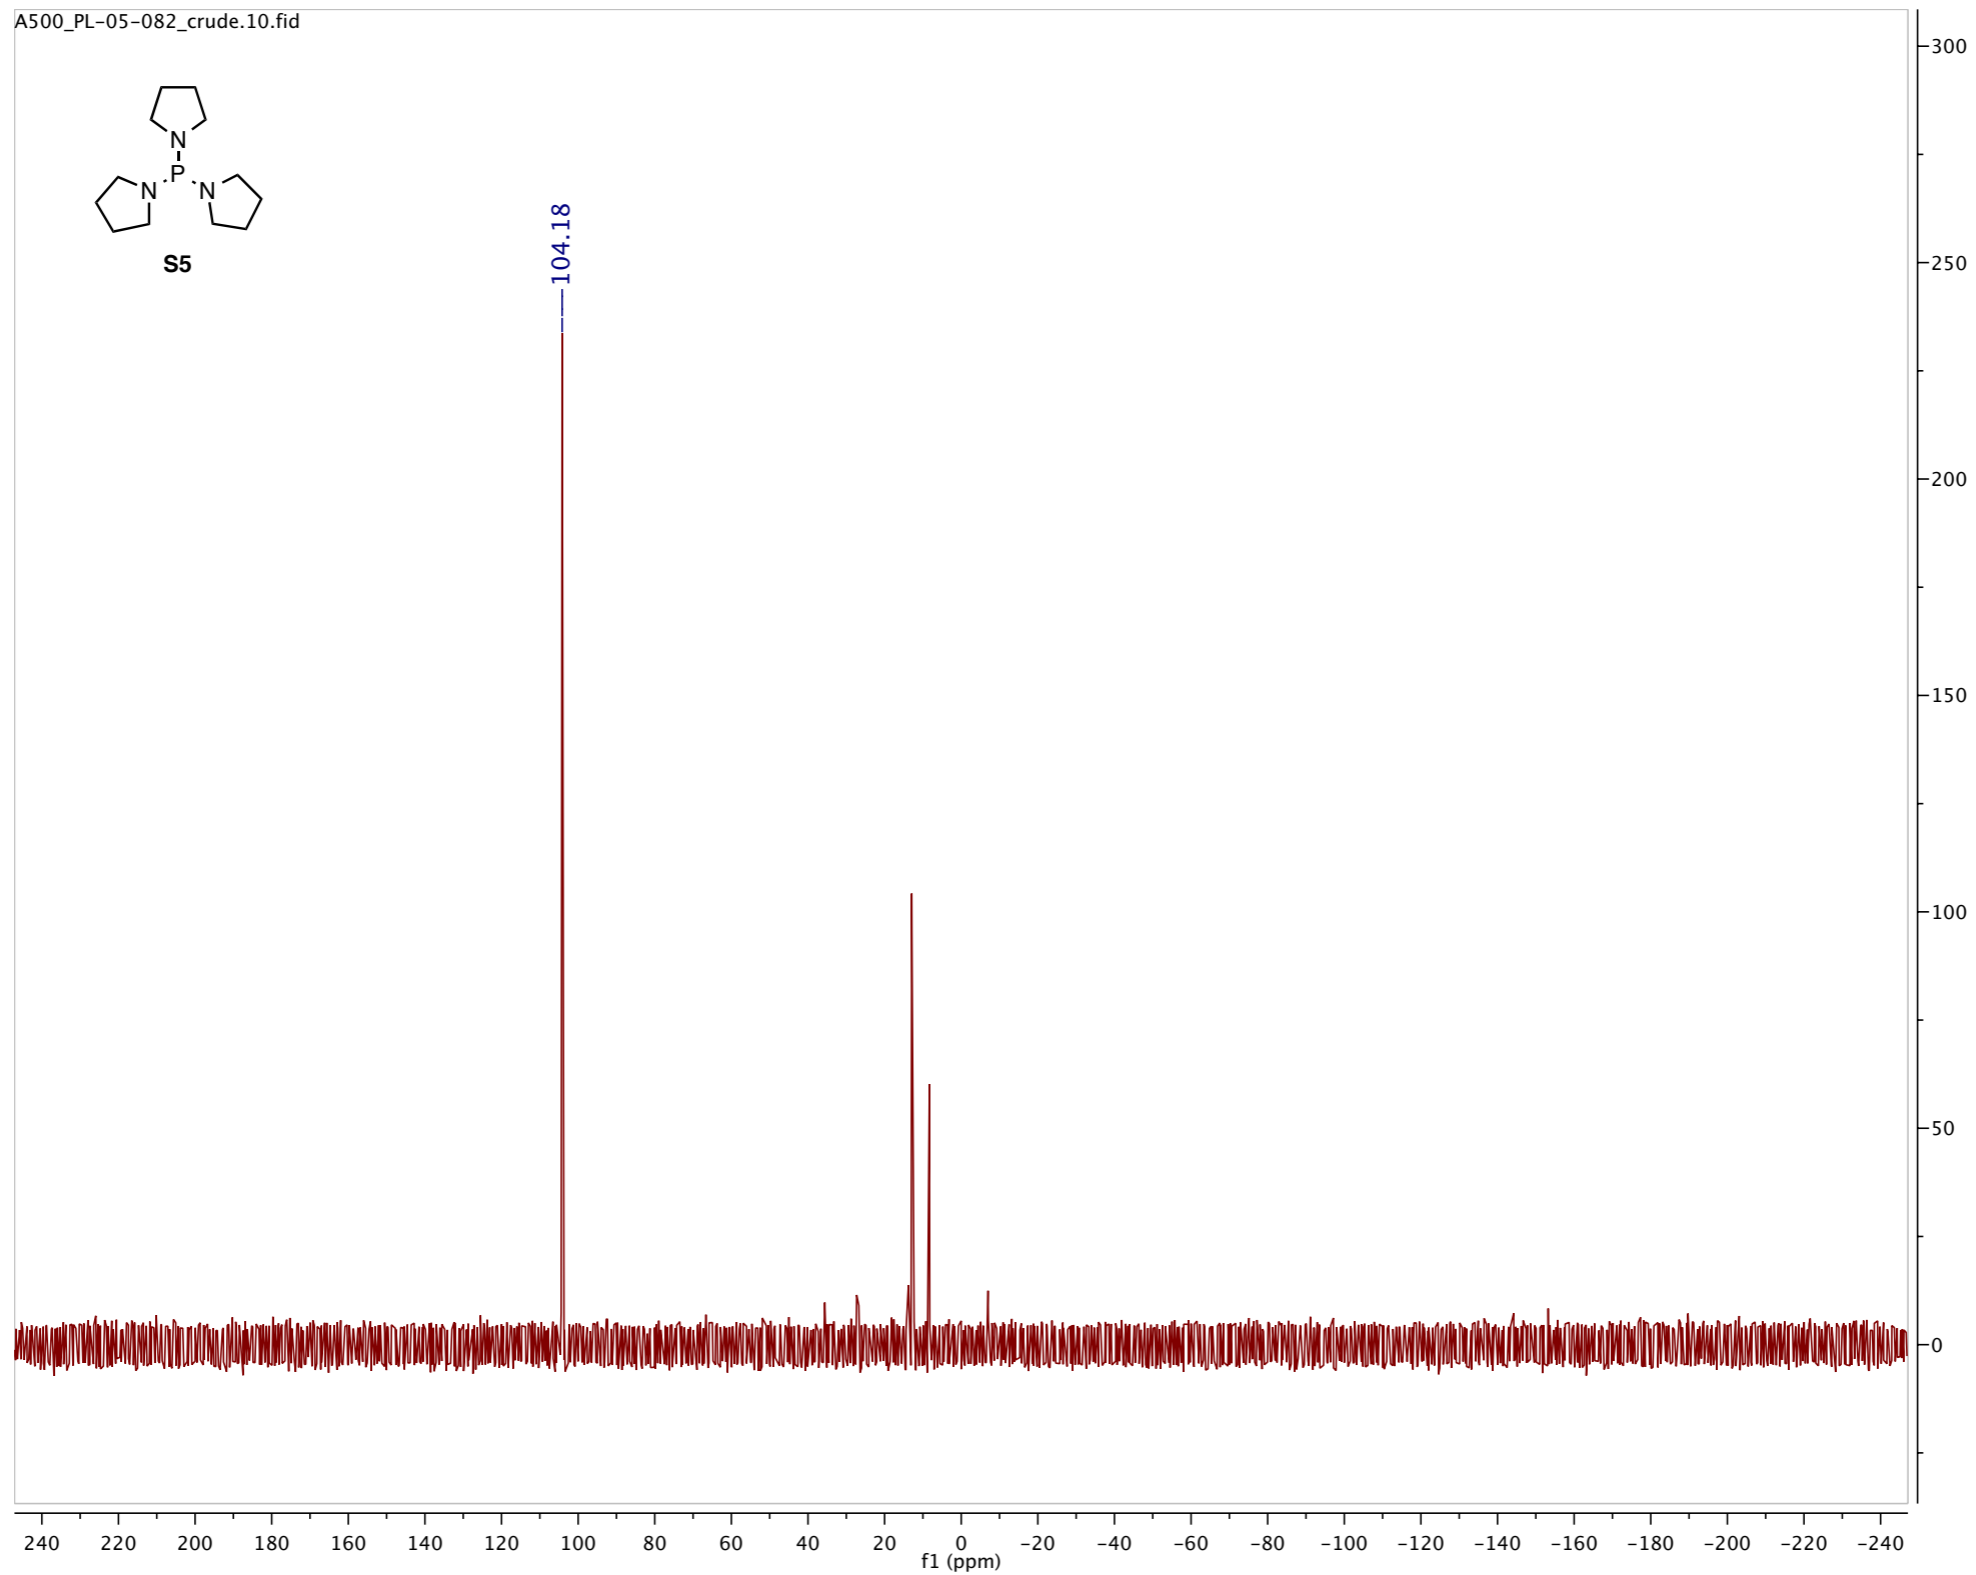

121 MHz  $^{31}\text{P}$ -NMR spectrum of crude **S5** in  $\text{C}_6\text{D}_6$

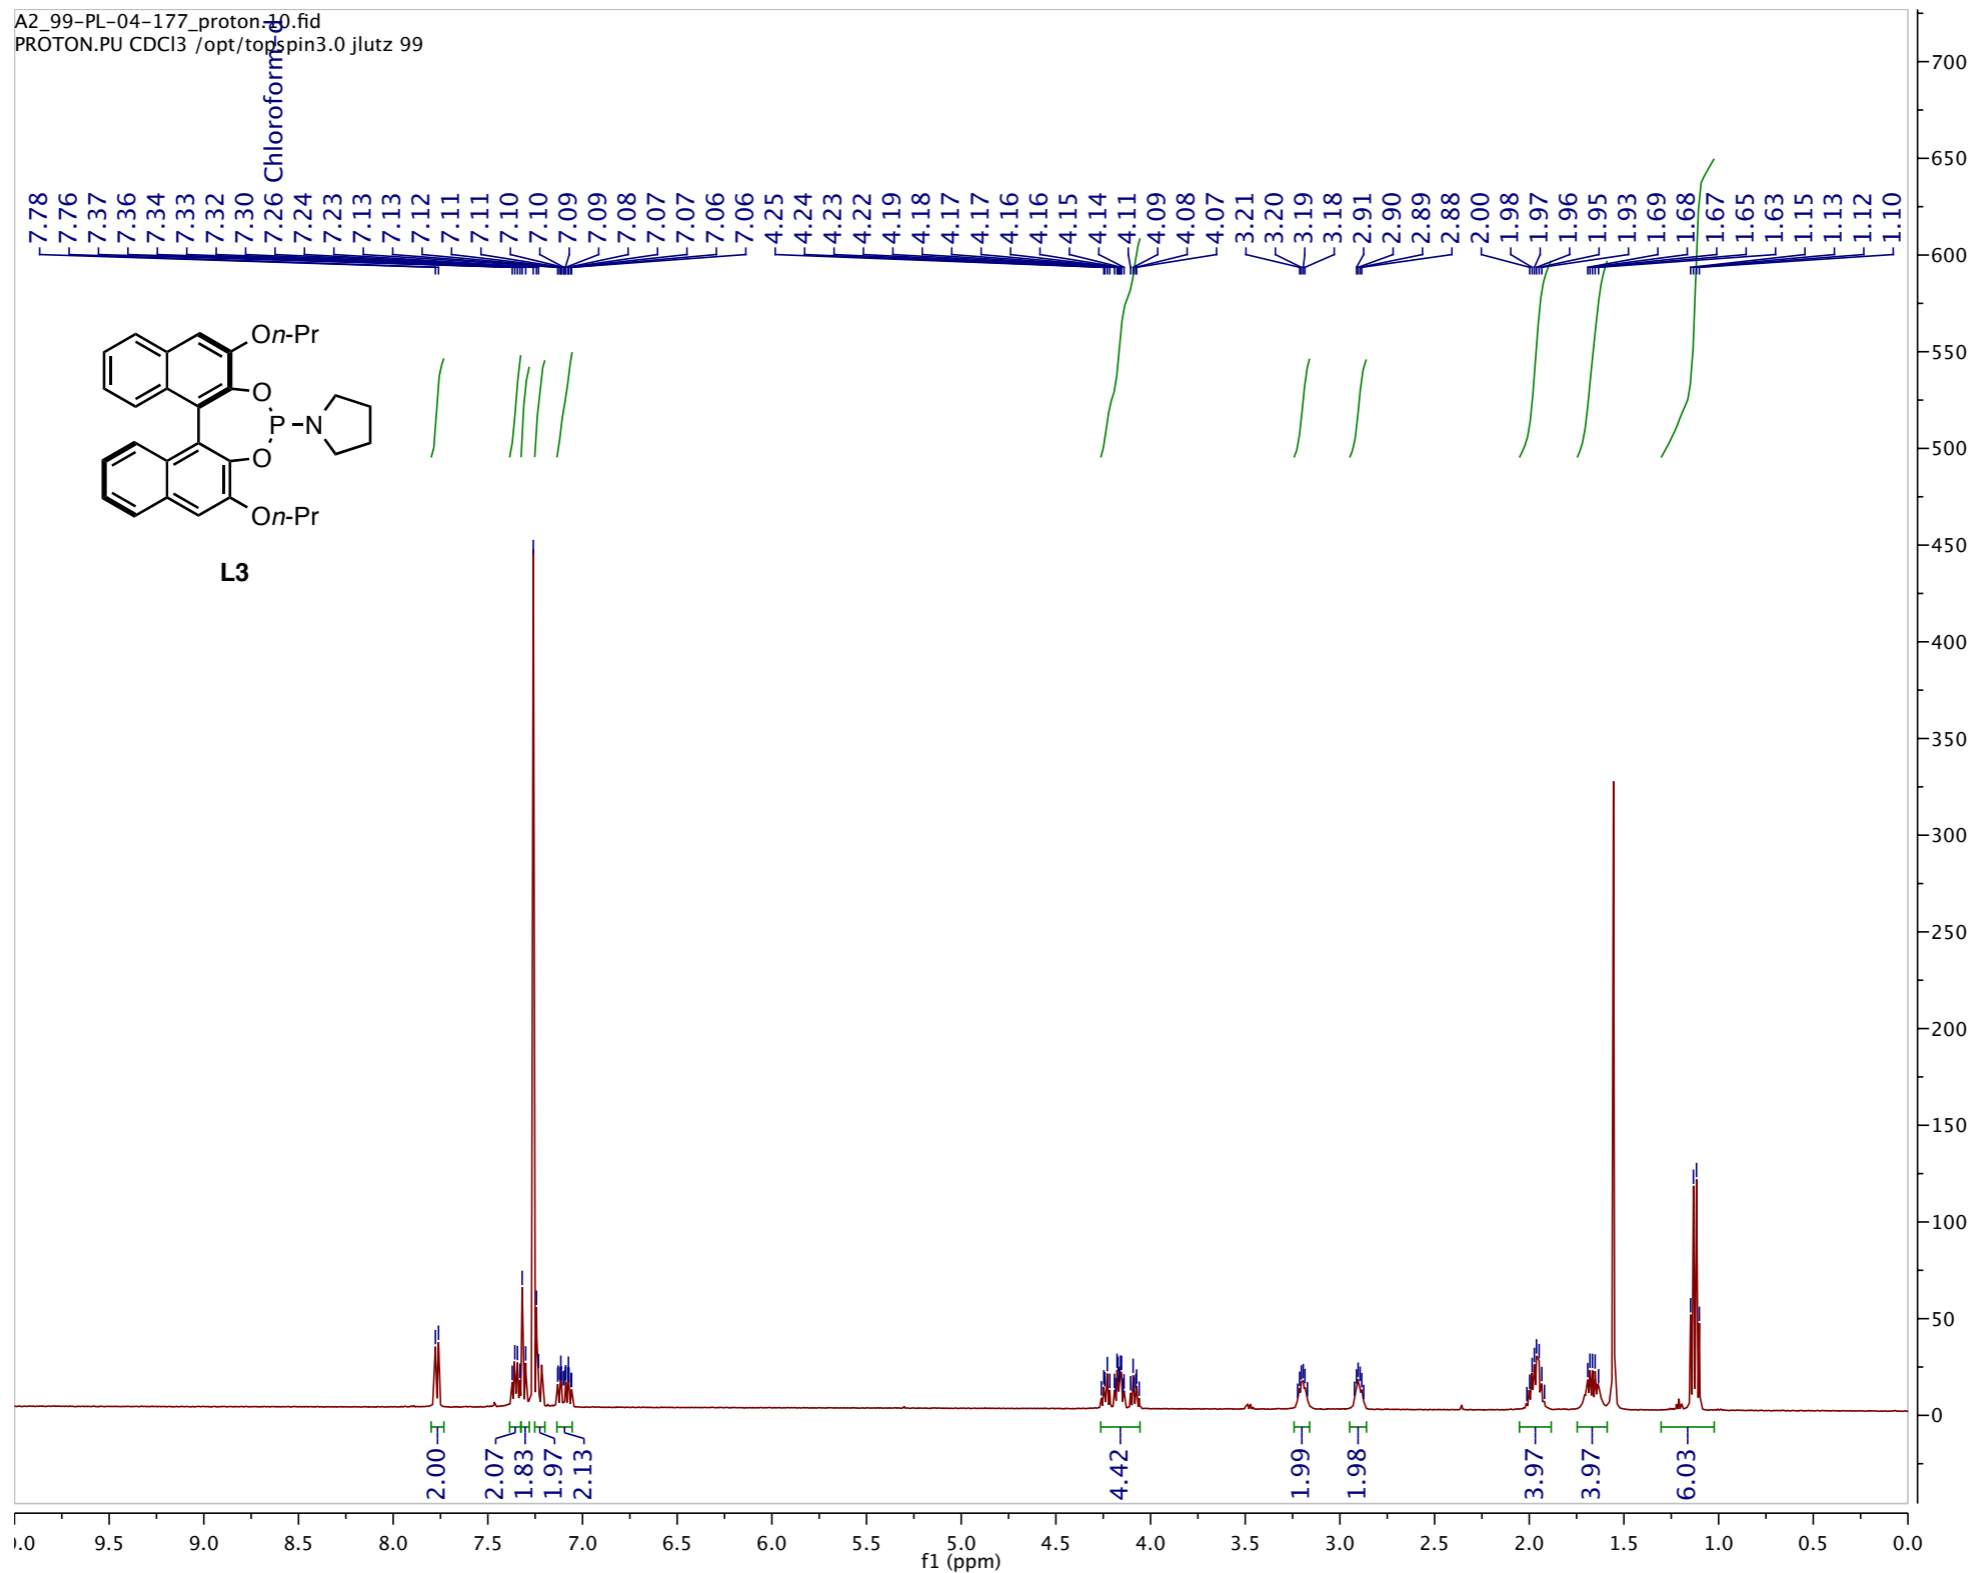

500 MHz <sup>1</sup>H-NMR spectrum of **L3** in CDCl<sub>3</sub>

A2\_99-PL-04-177\_carbon.10.fid  
C13CPDp1.PU CDCl3 /opt/topspin3.0 jlutz 99

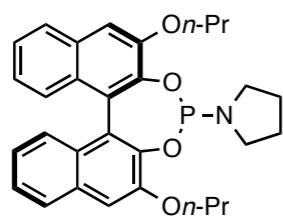

**L3**

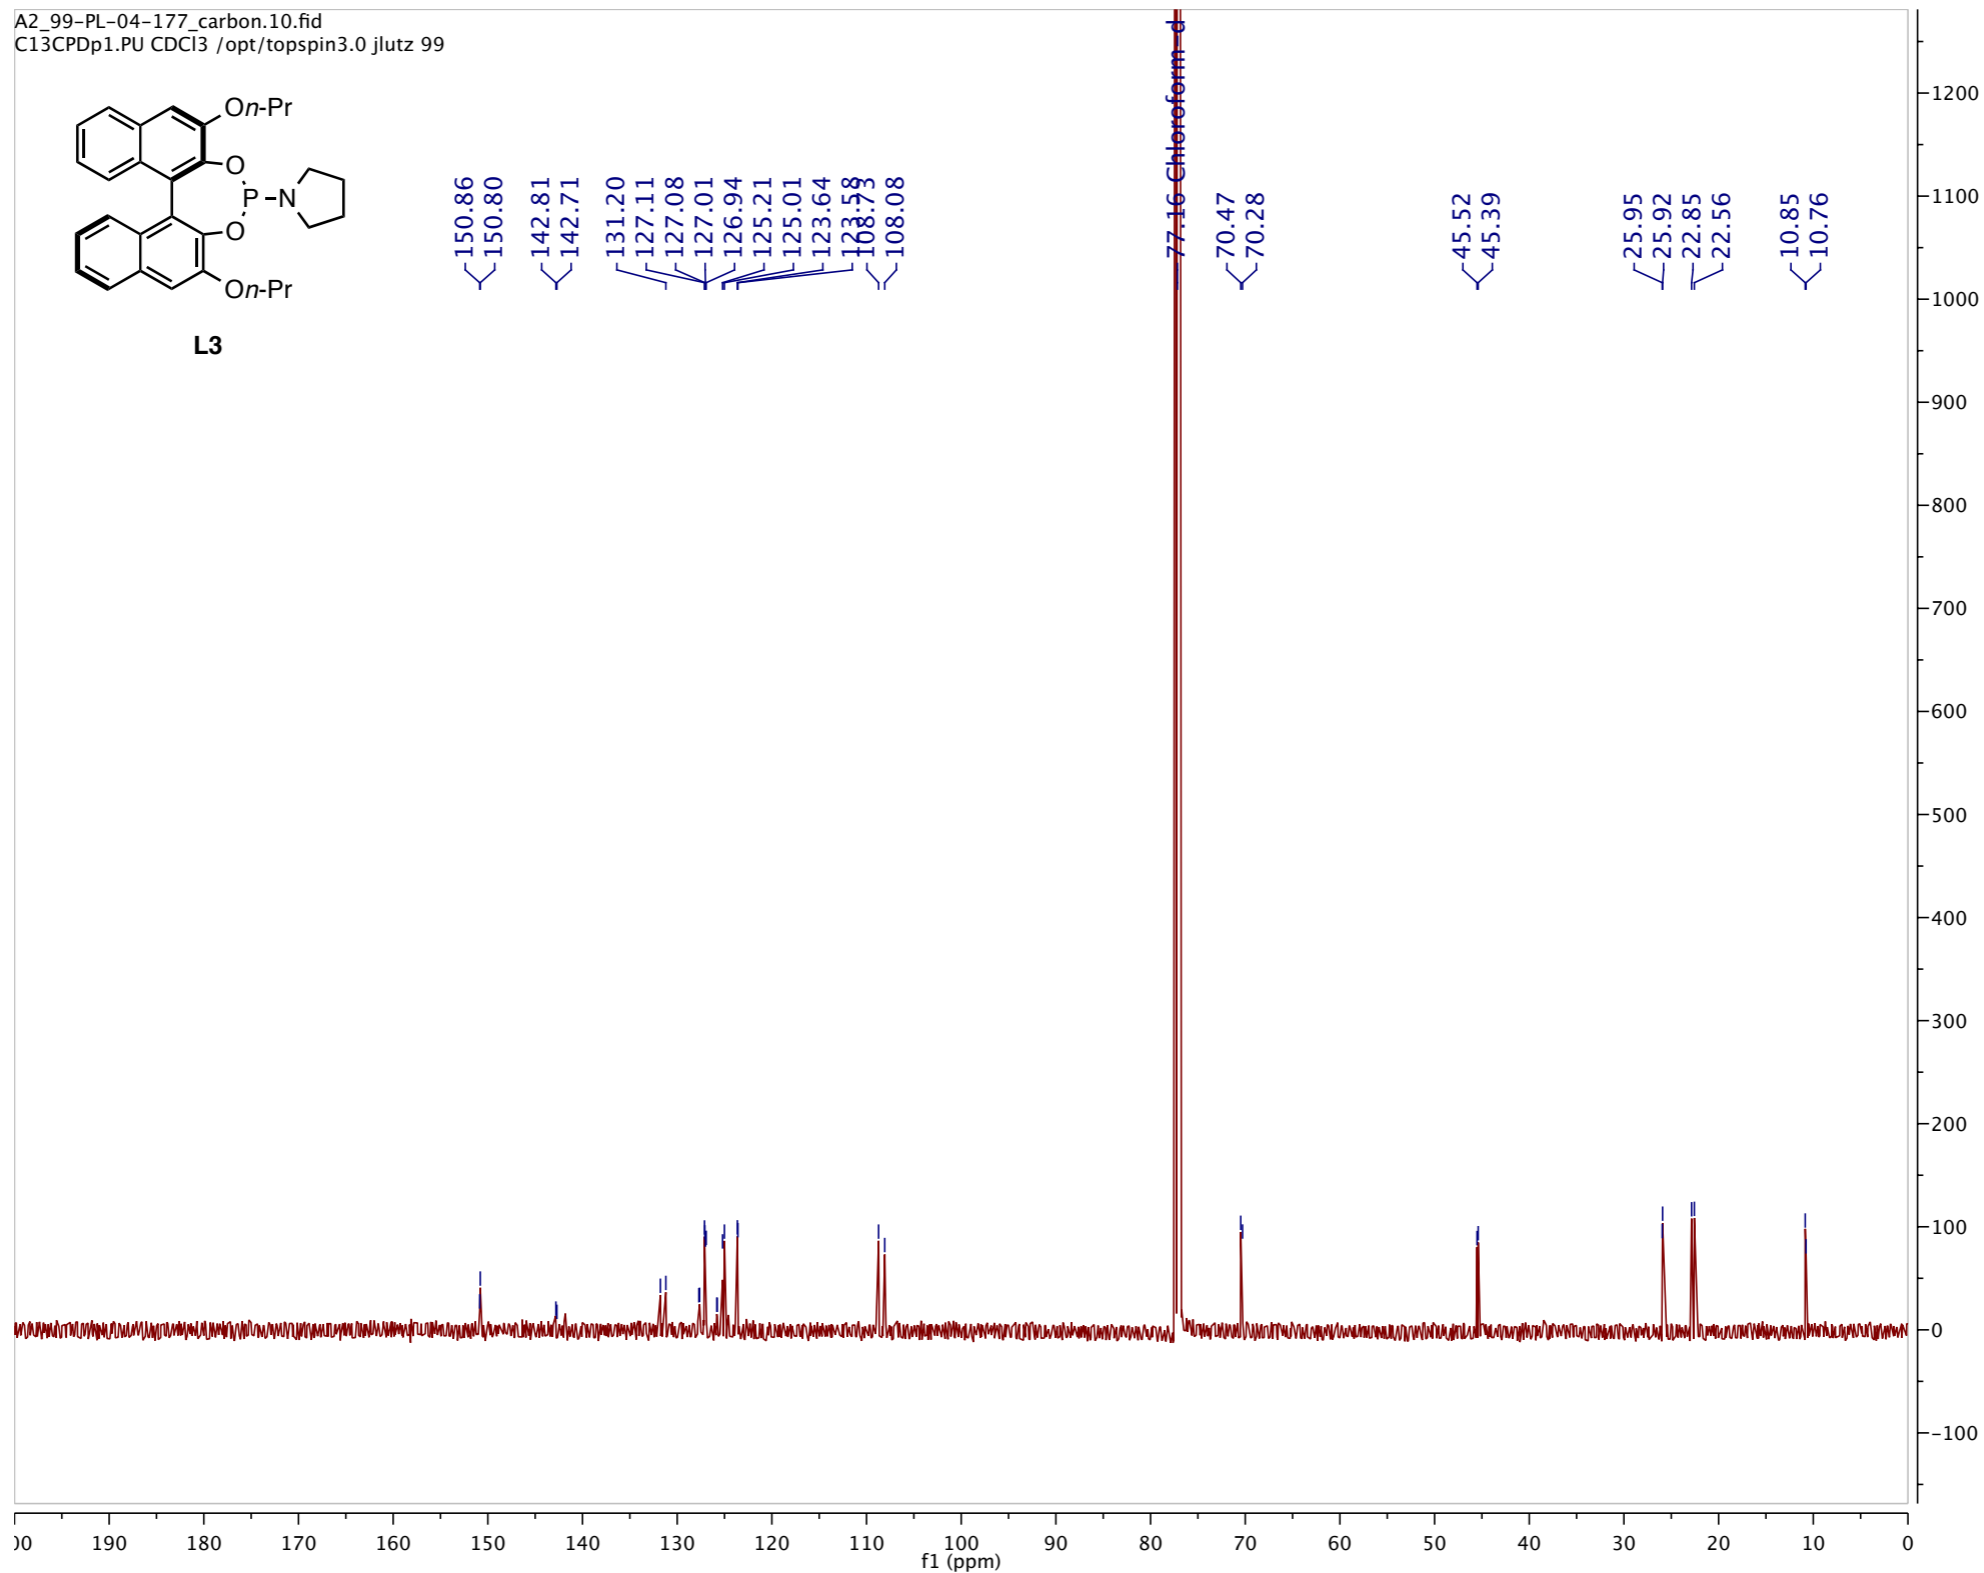

125 MHz  $^{13}\text{C}$ -NMR spectrum of **L3** in  $\text{CDCl}_3$

A3\_99-PL-04-177\_phosphorus.10.fid

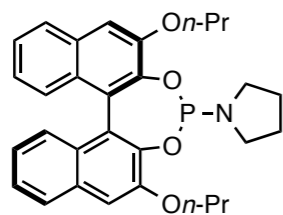

**L3**

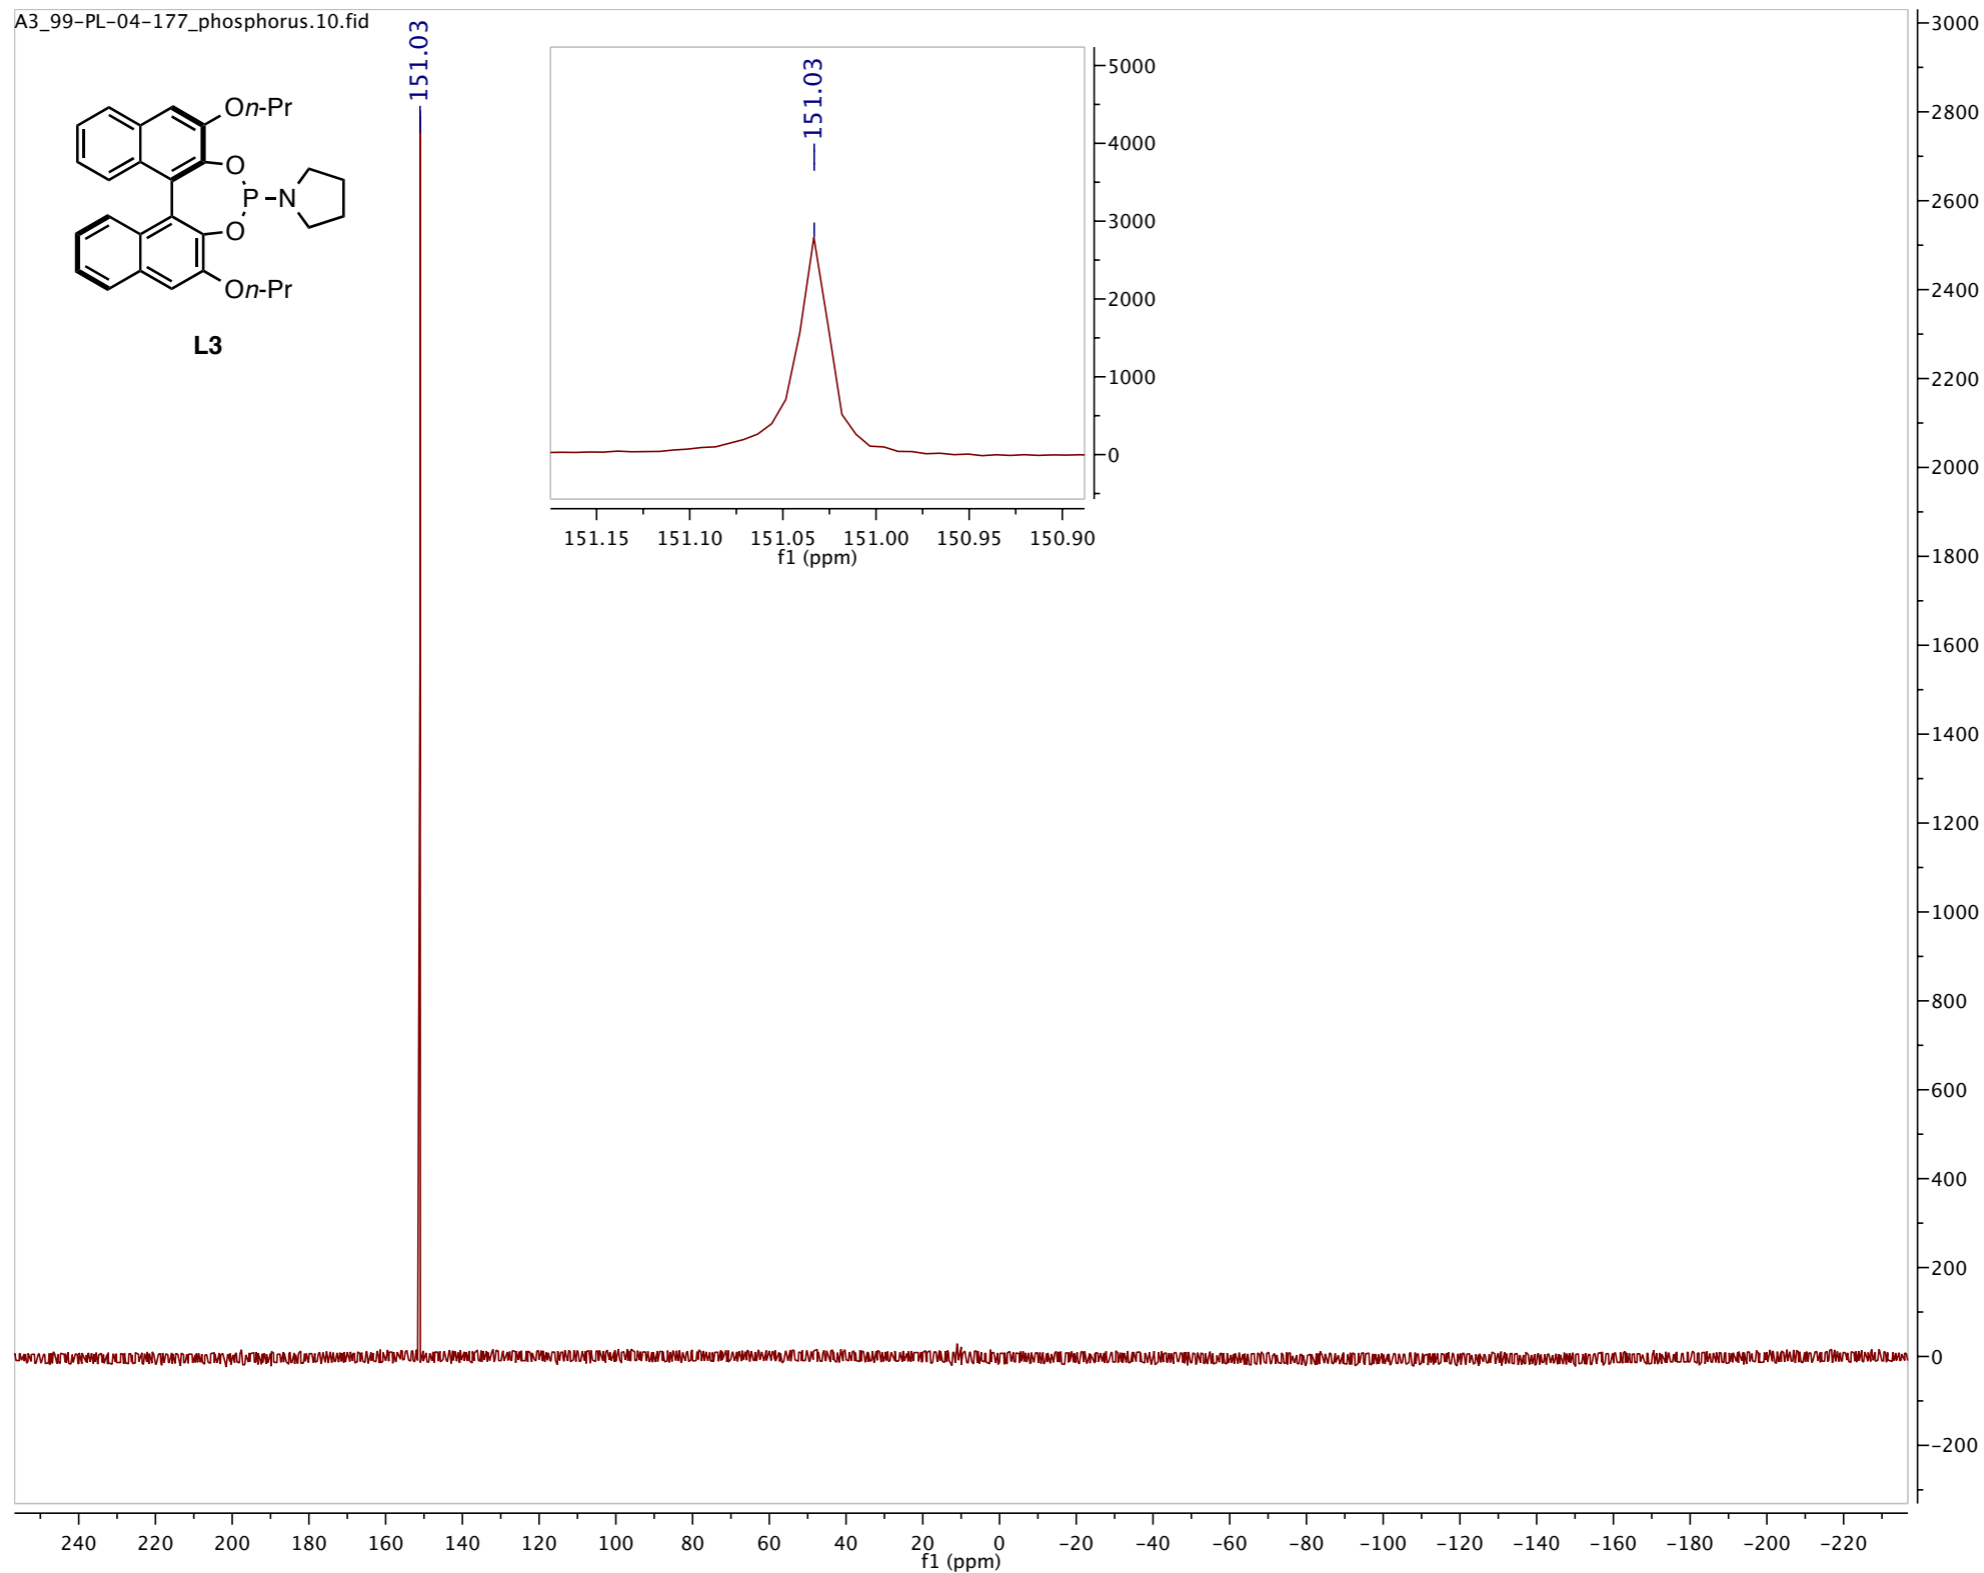

121 MHz  $^{31}\text{P}$ -NMR spectrum of **L3** in  $\text{CDCl}_3$

NB3\_PL-04-291.11.fid

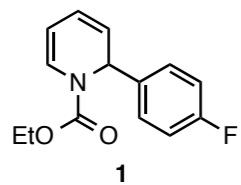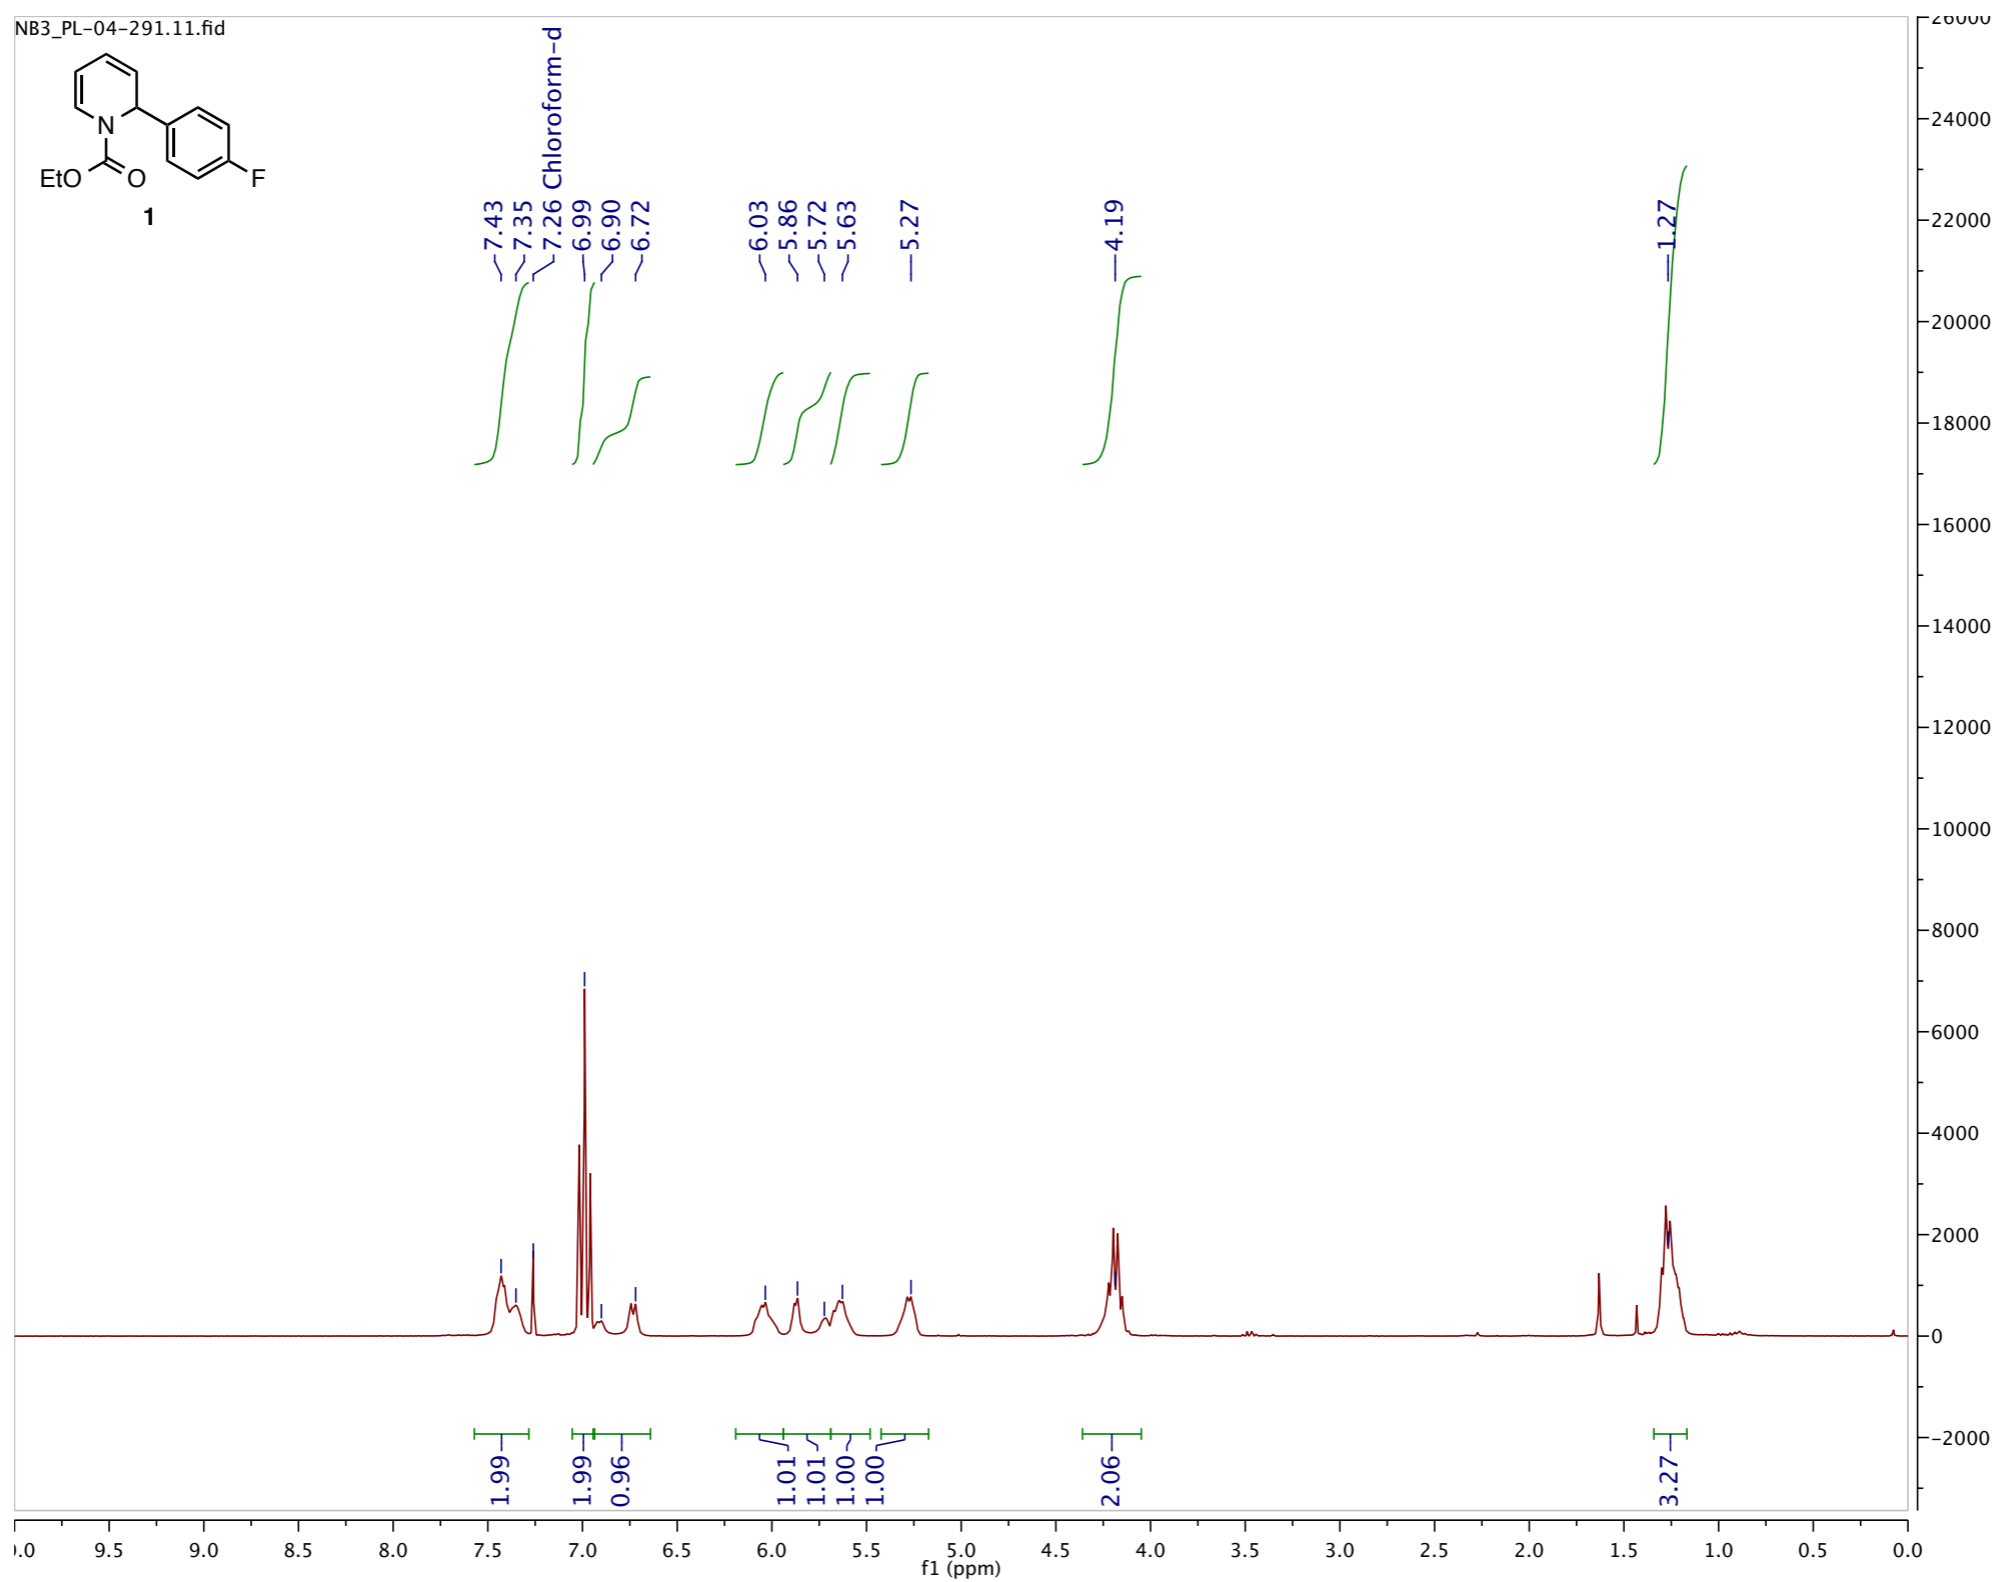

A2\_27-PL-05-247\_3\_carbon.10.fid  
C13CPDp1.PU CDCl3 /opt/topspin3.0 jlutz 27

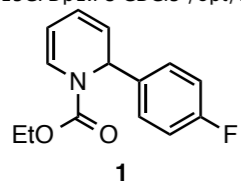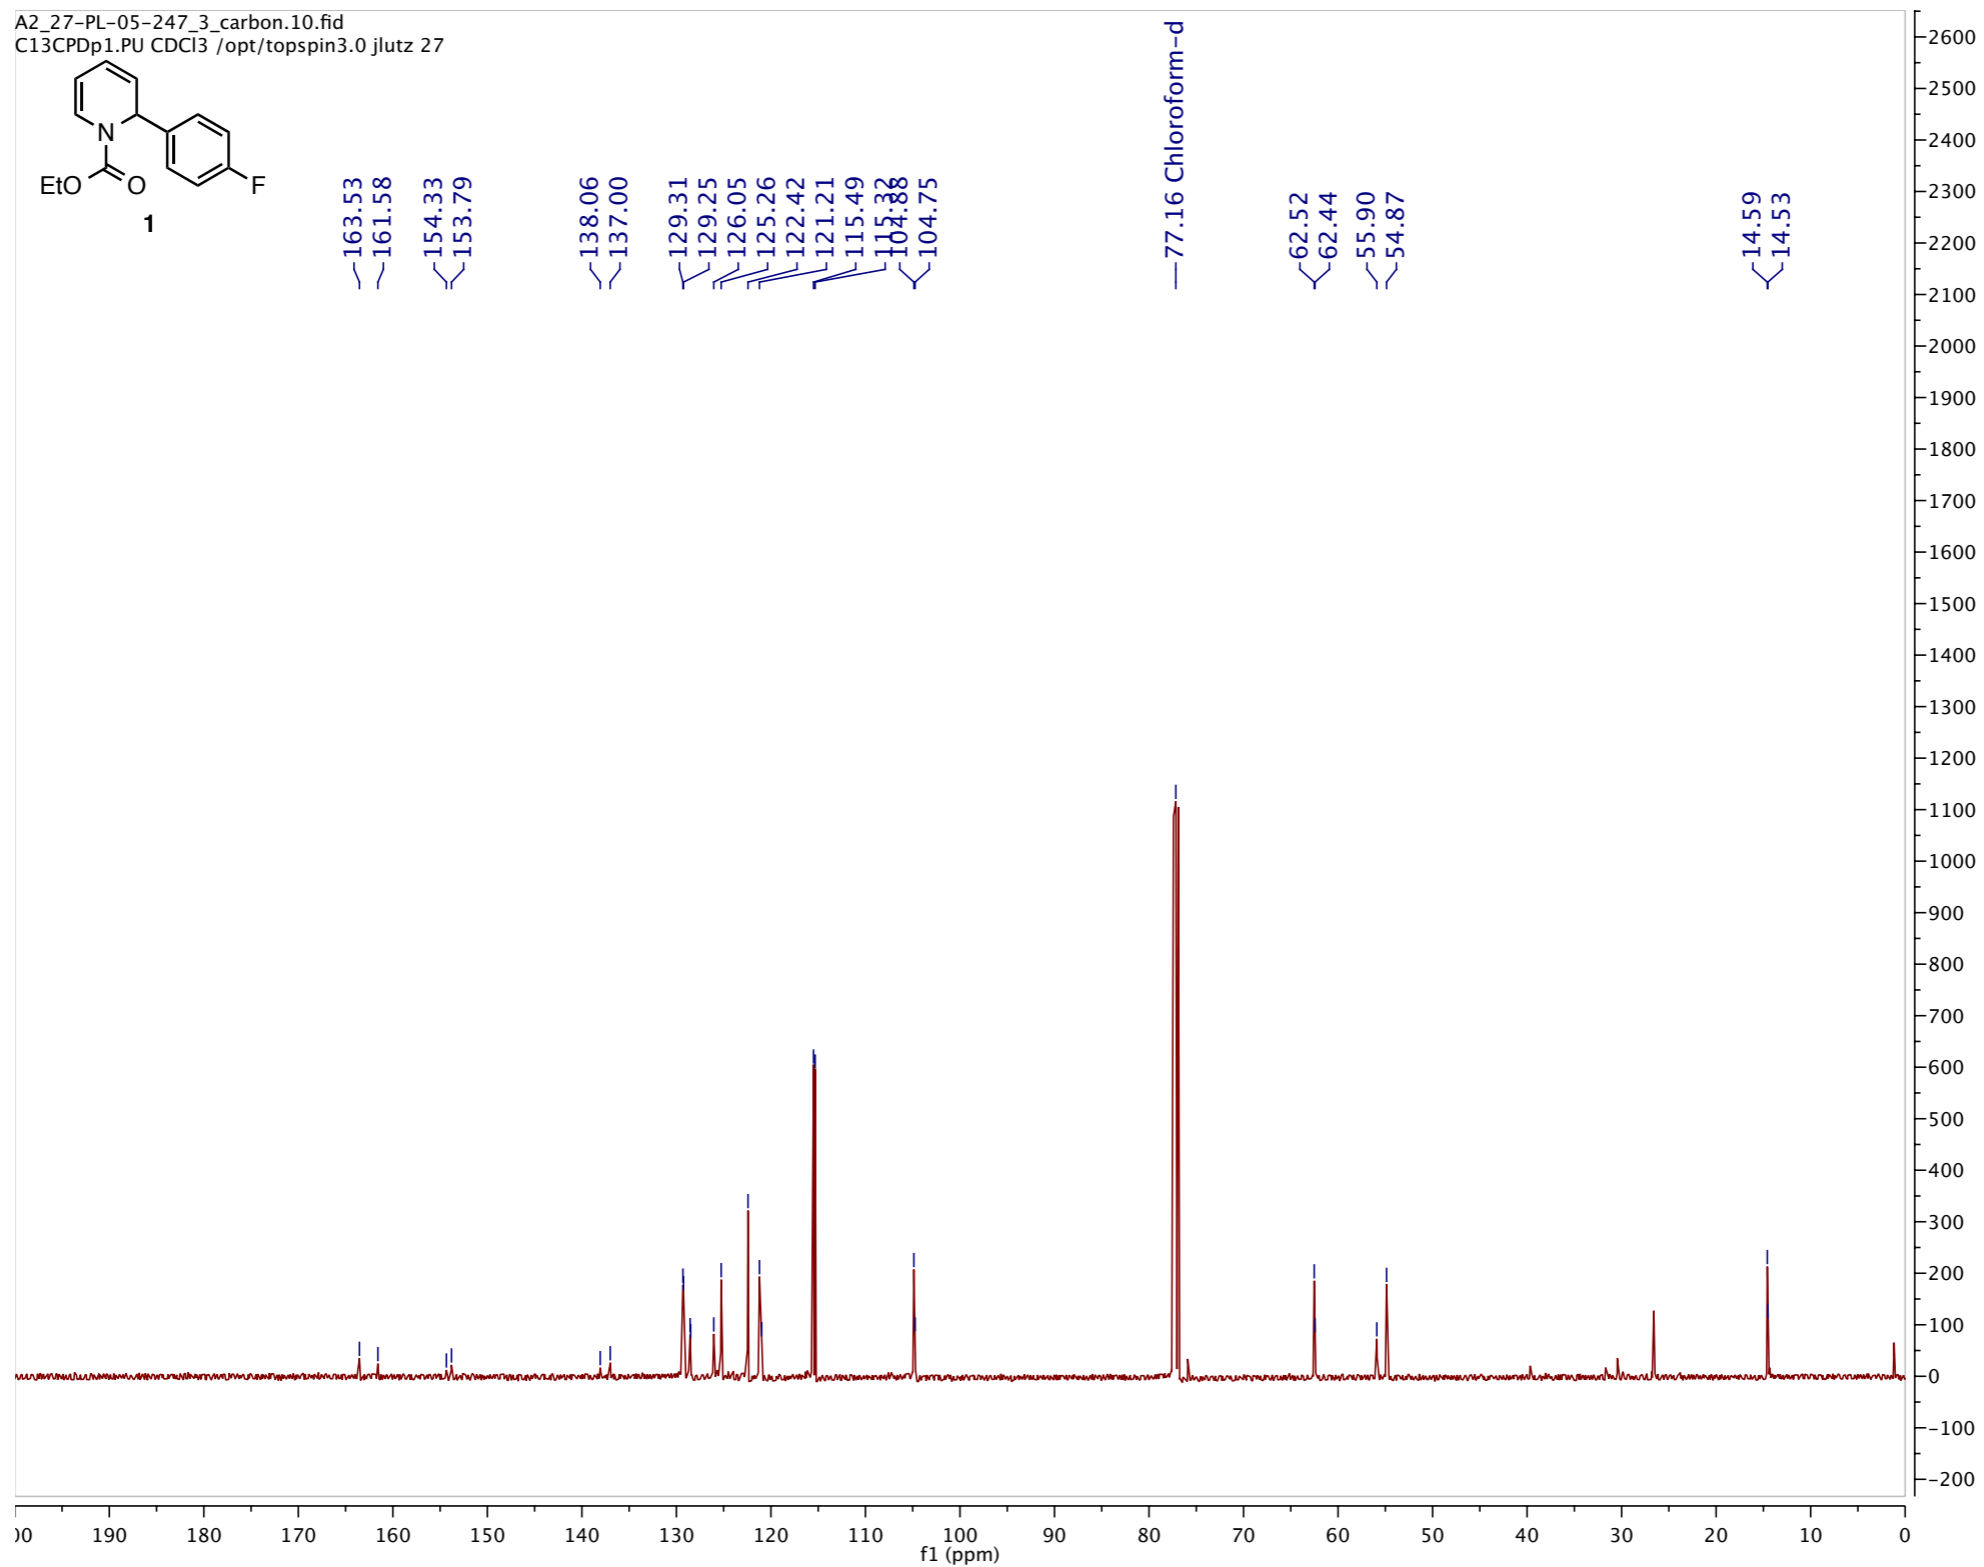

125 MHz <sup>13</sup>C-NMR spectrum of **1** in CDCl<sub>3</sub>

NB3\_PL-04-291.10.fid

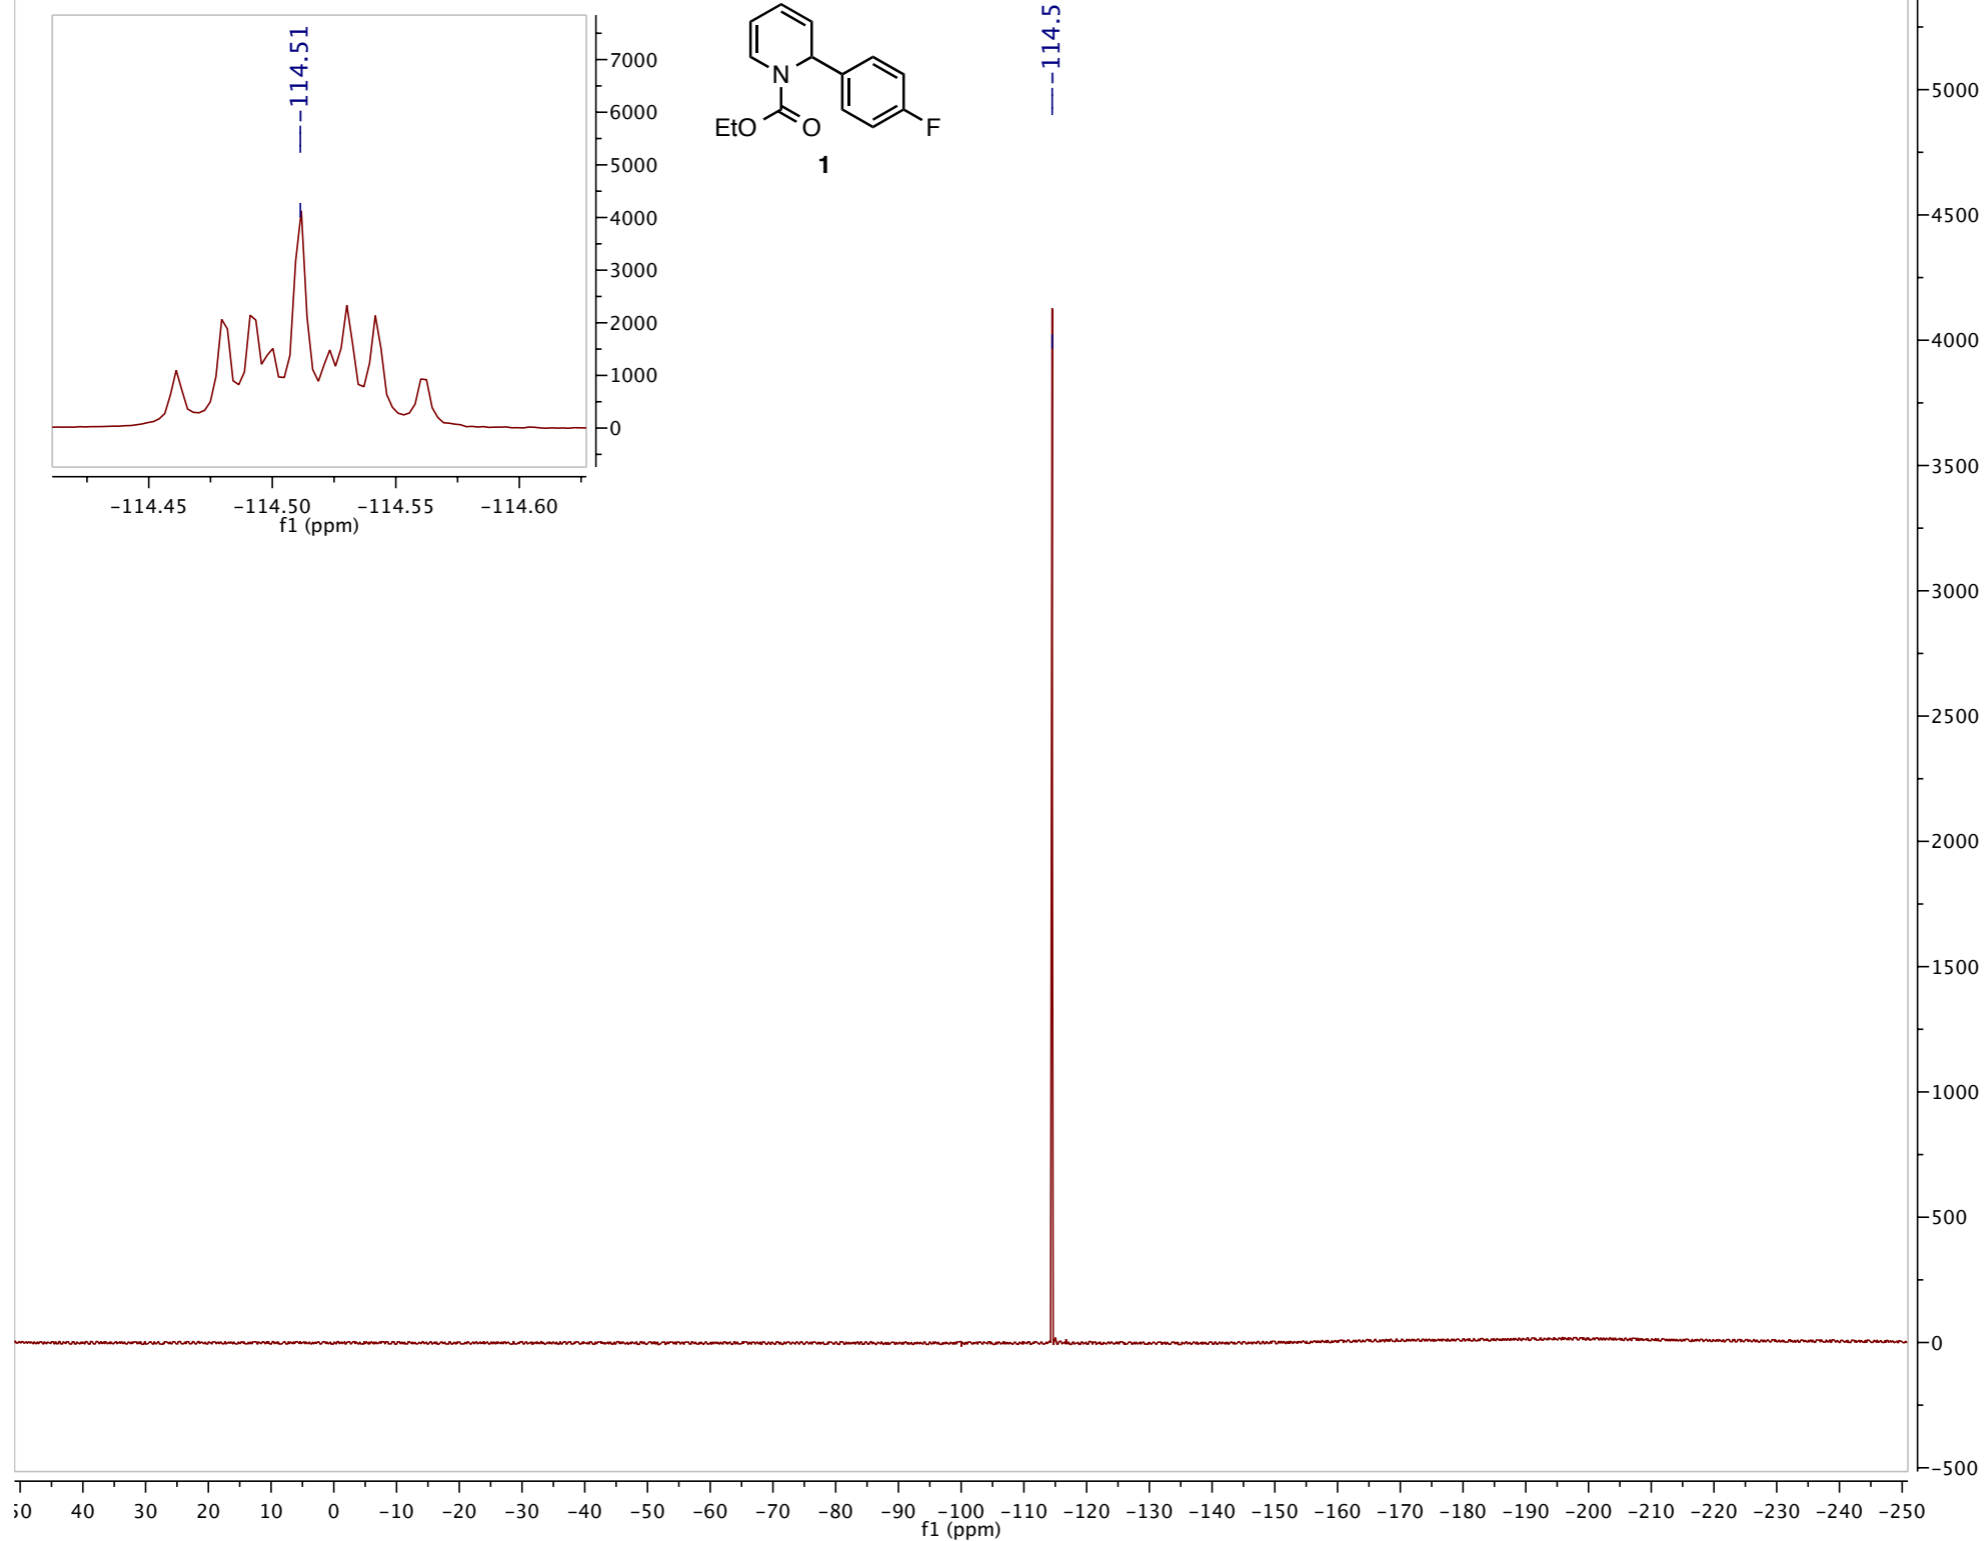

282 MHz  $^{19}\text{F}$ -NMR spectrum of **1** in  $\text{CDCl}_3$

A2\_19-PL-05-247\_2\_prep\_proton.10.fid  
PROTON.PU CDCl3 /opt/topspin3.0 jlutz 19

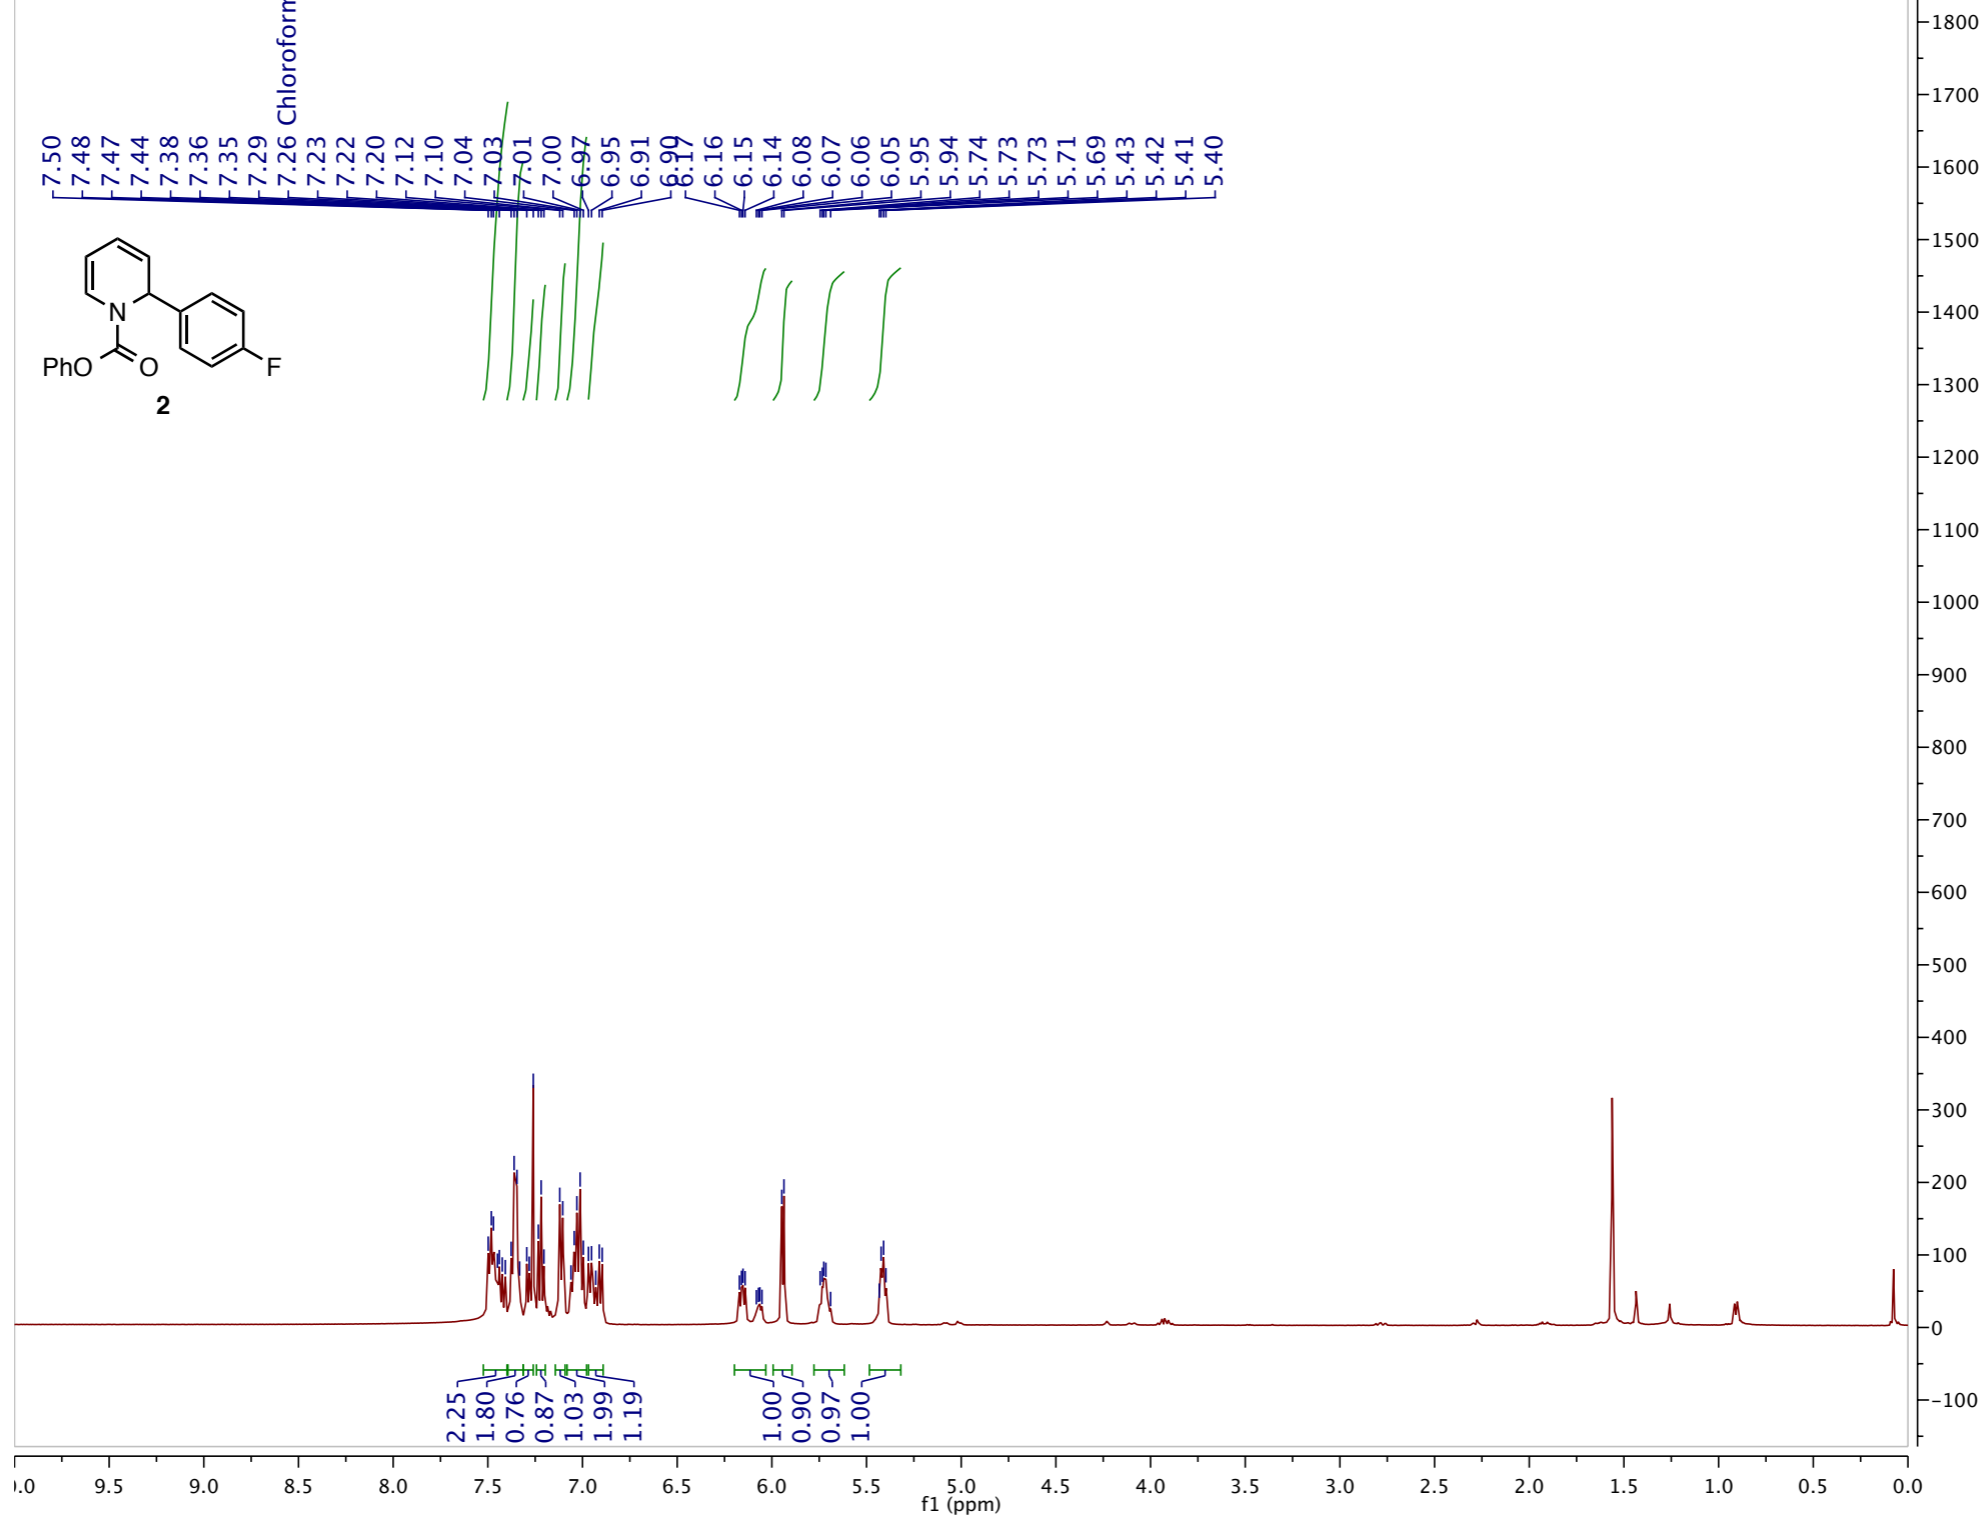

500 MHz <sup>1</sup>H-NMR spectrum of **2** in CDCl<sub>3</sub>



A2\_19-PL-05-247\_2\_prep\_carbon.10.fid  
C13CPDp1.PU CDCl3 /opt/topspin3.0 jlutz 19

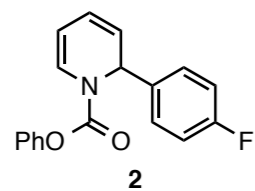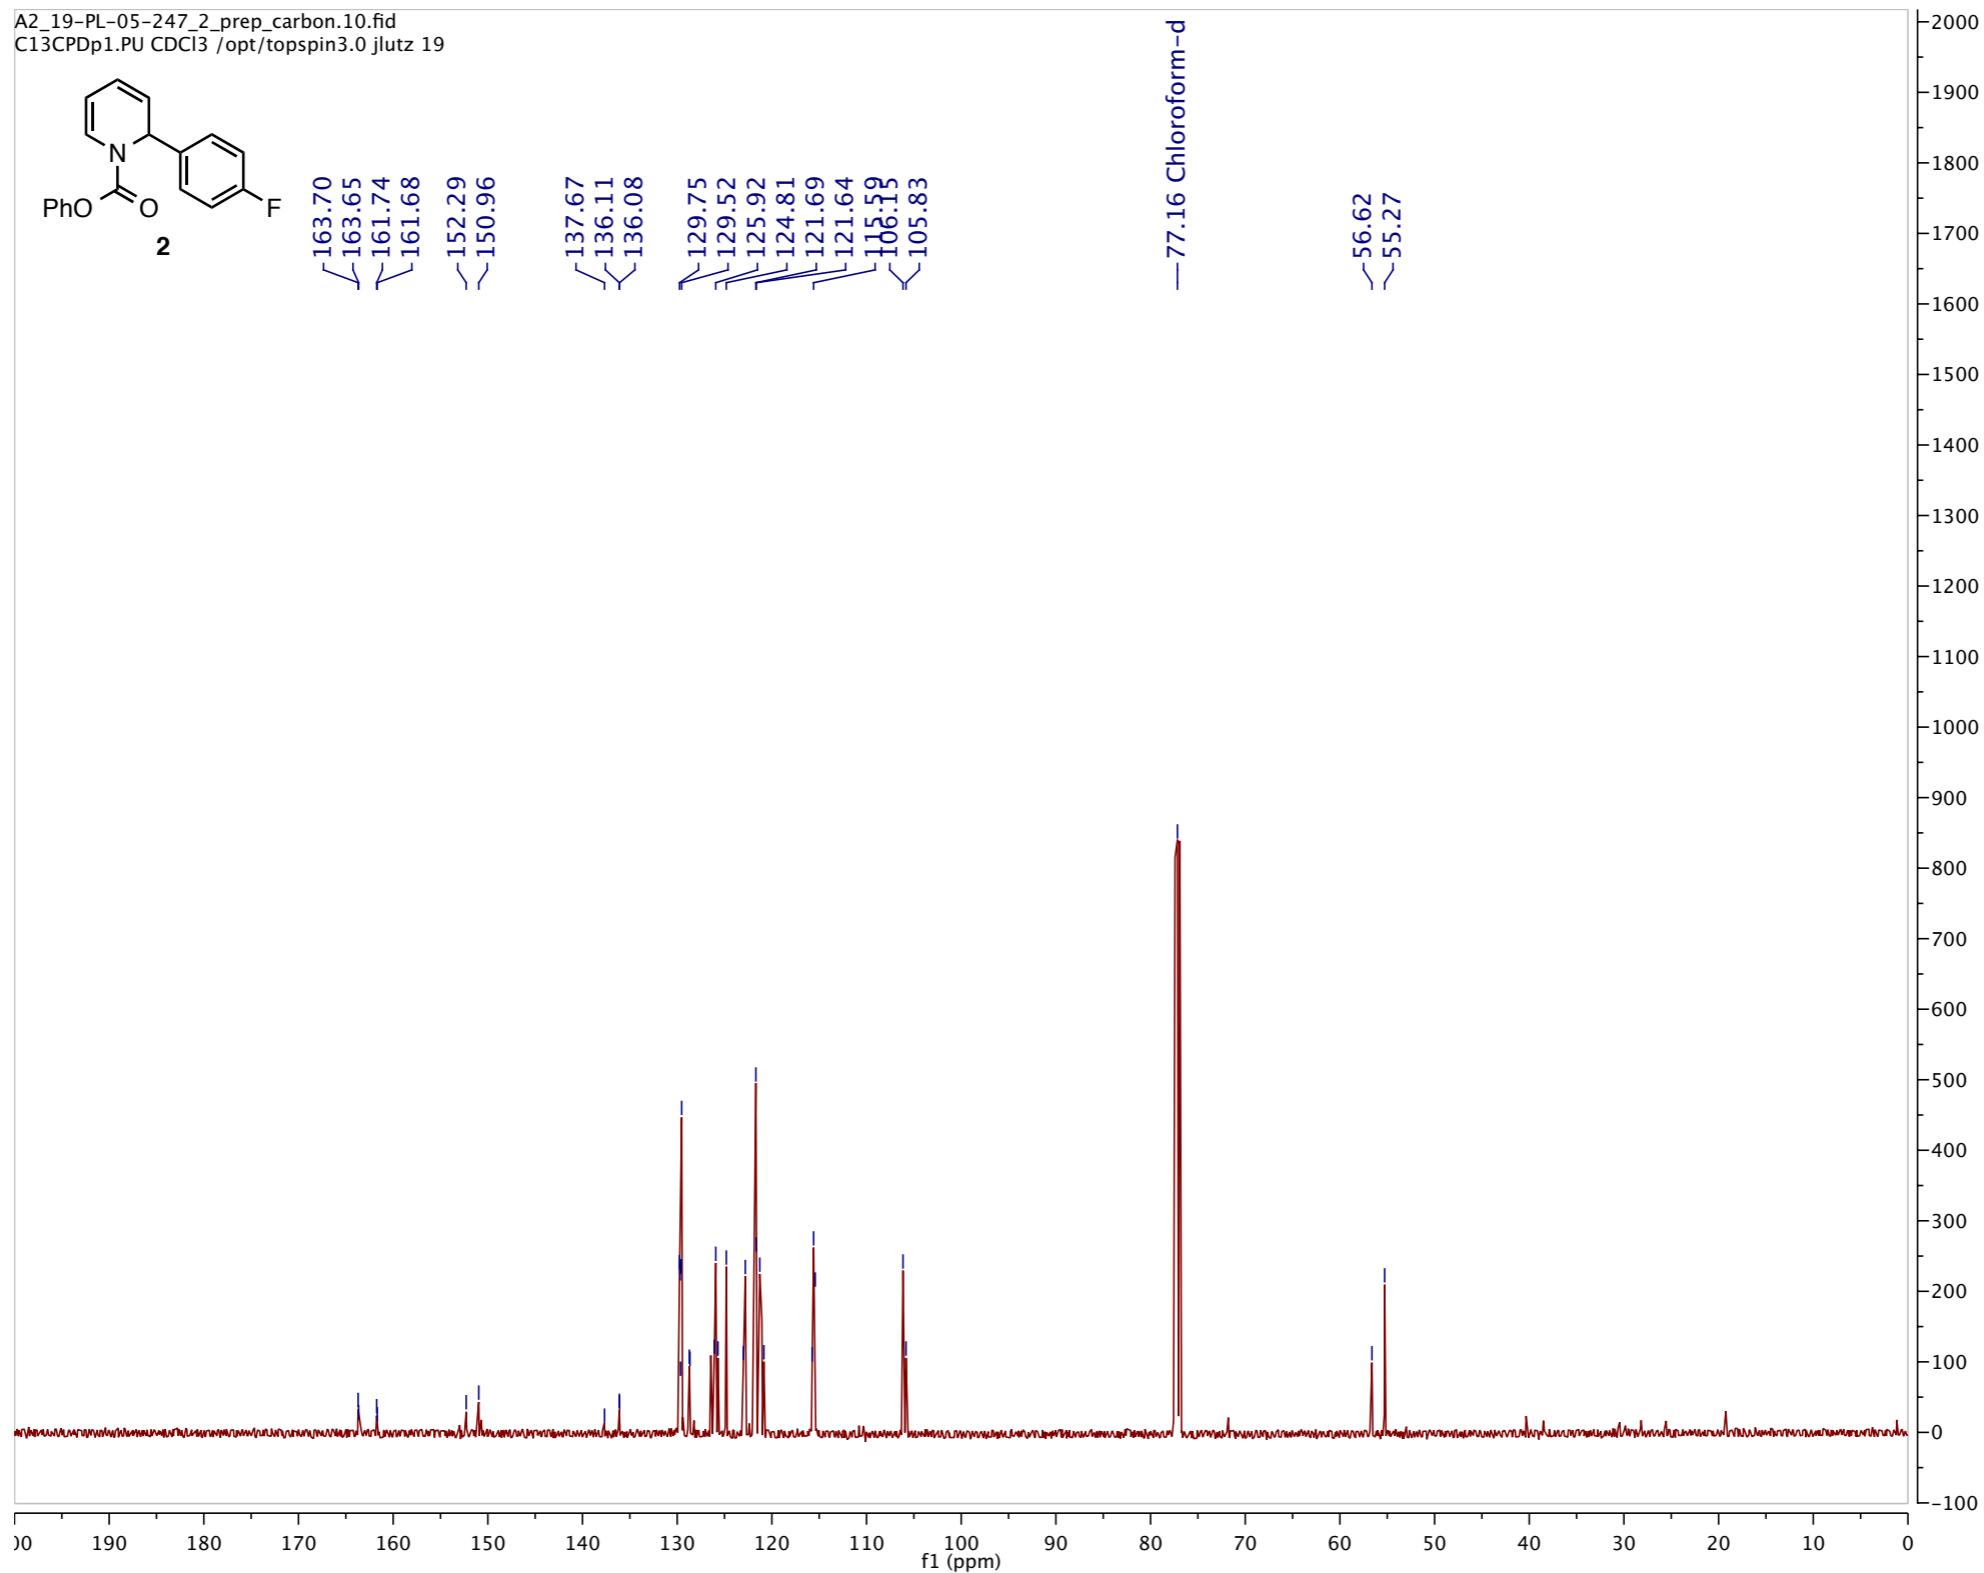

125 MHz <sup>13</sup>C-NMR spectrum of **2** in CDCl<sub>3</sub>

NB3\_PL-05-060.10.fid

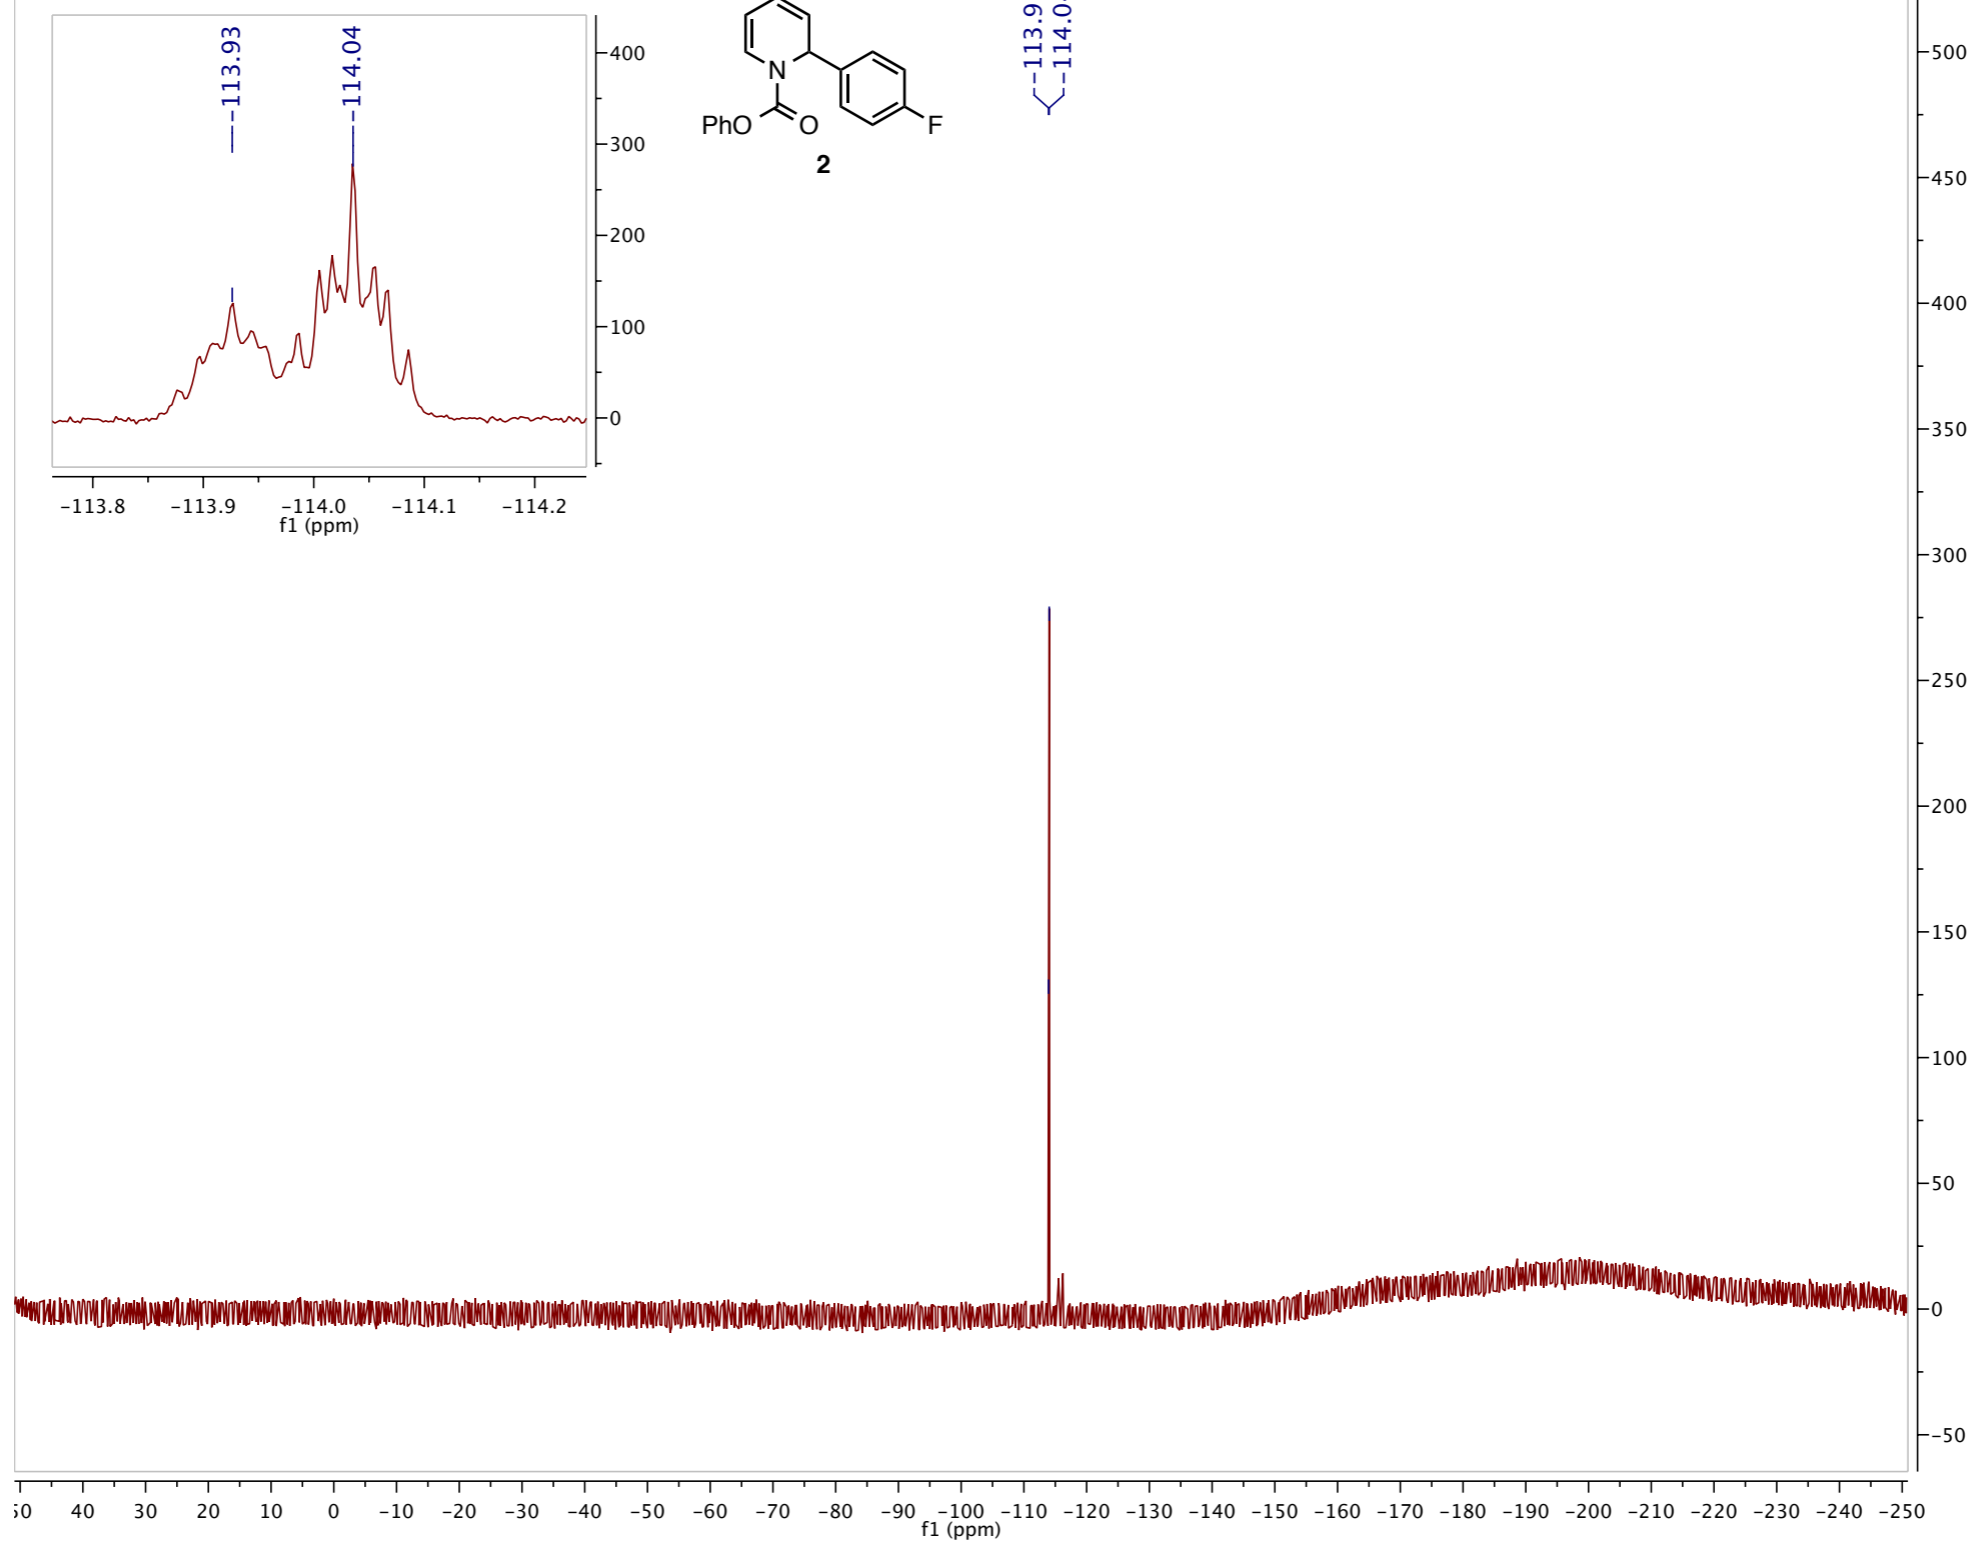

282 MHz  $^{19}\text{F}$ -NMR spectrum of **2** in  $\text{CDCl}_3$

NB3\_PL-04-290.21.fid

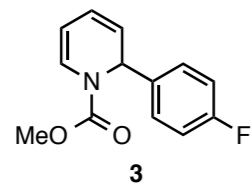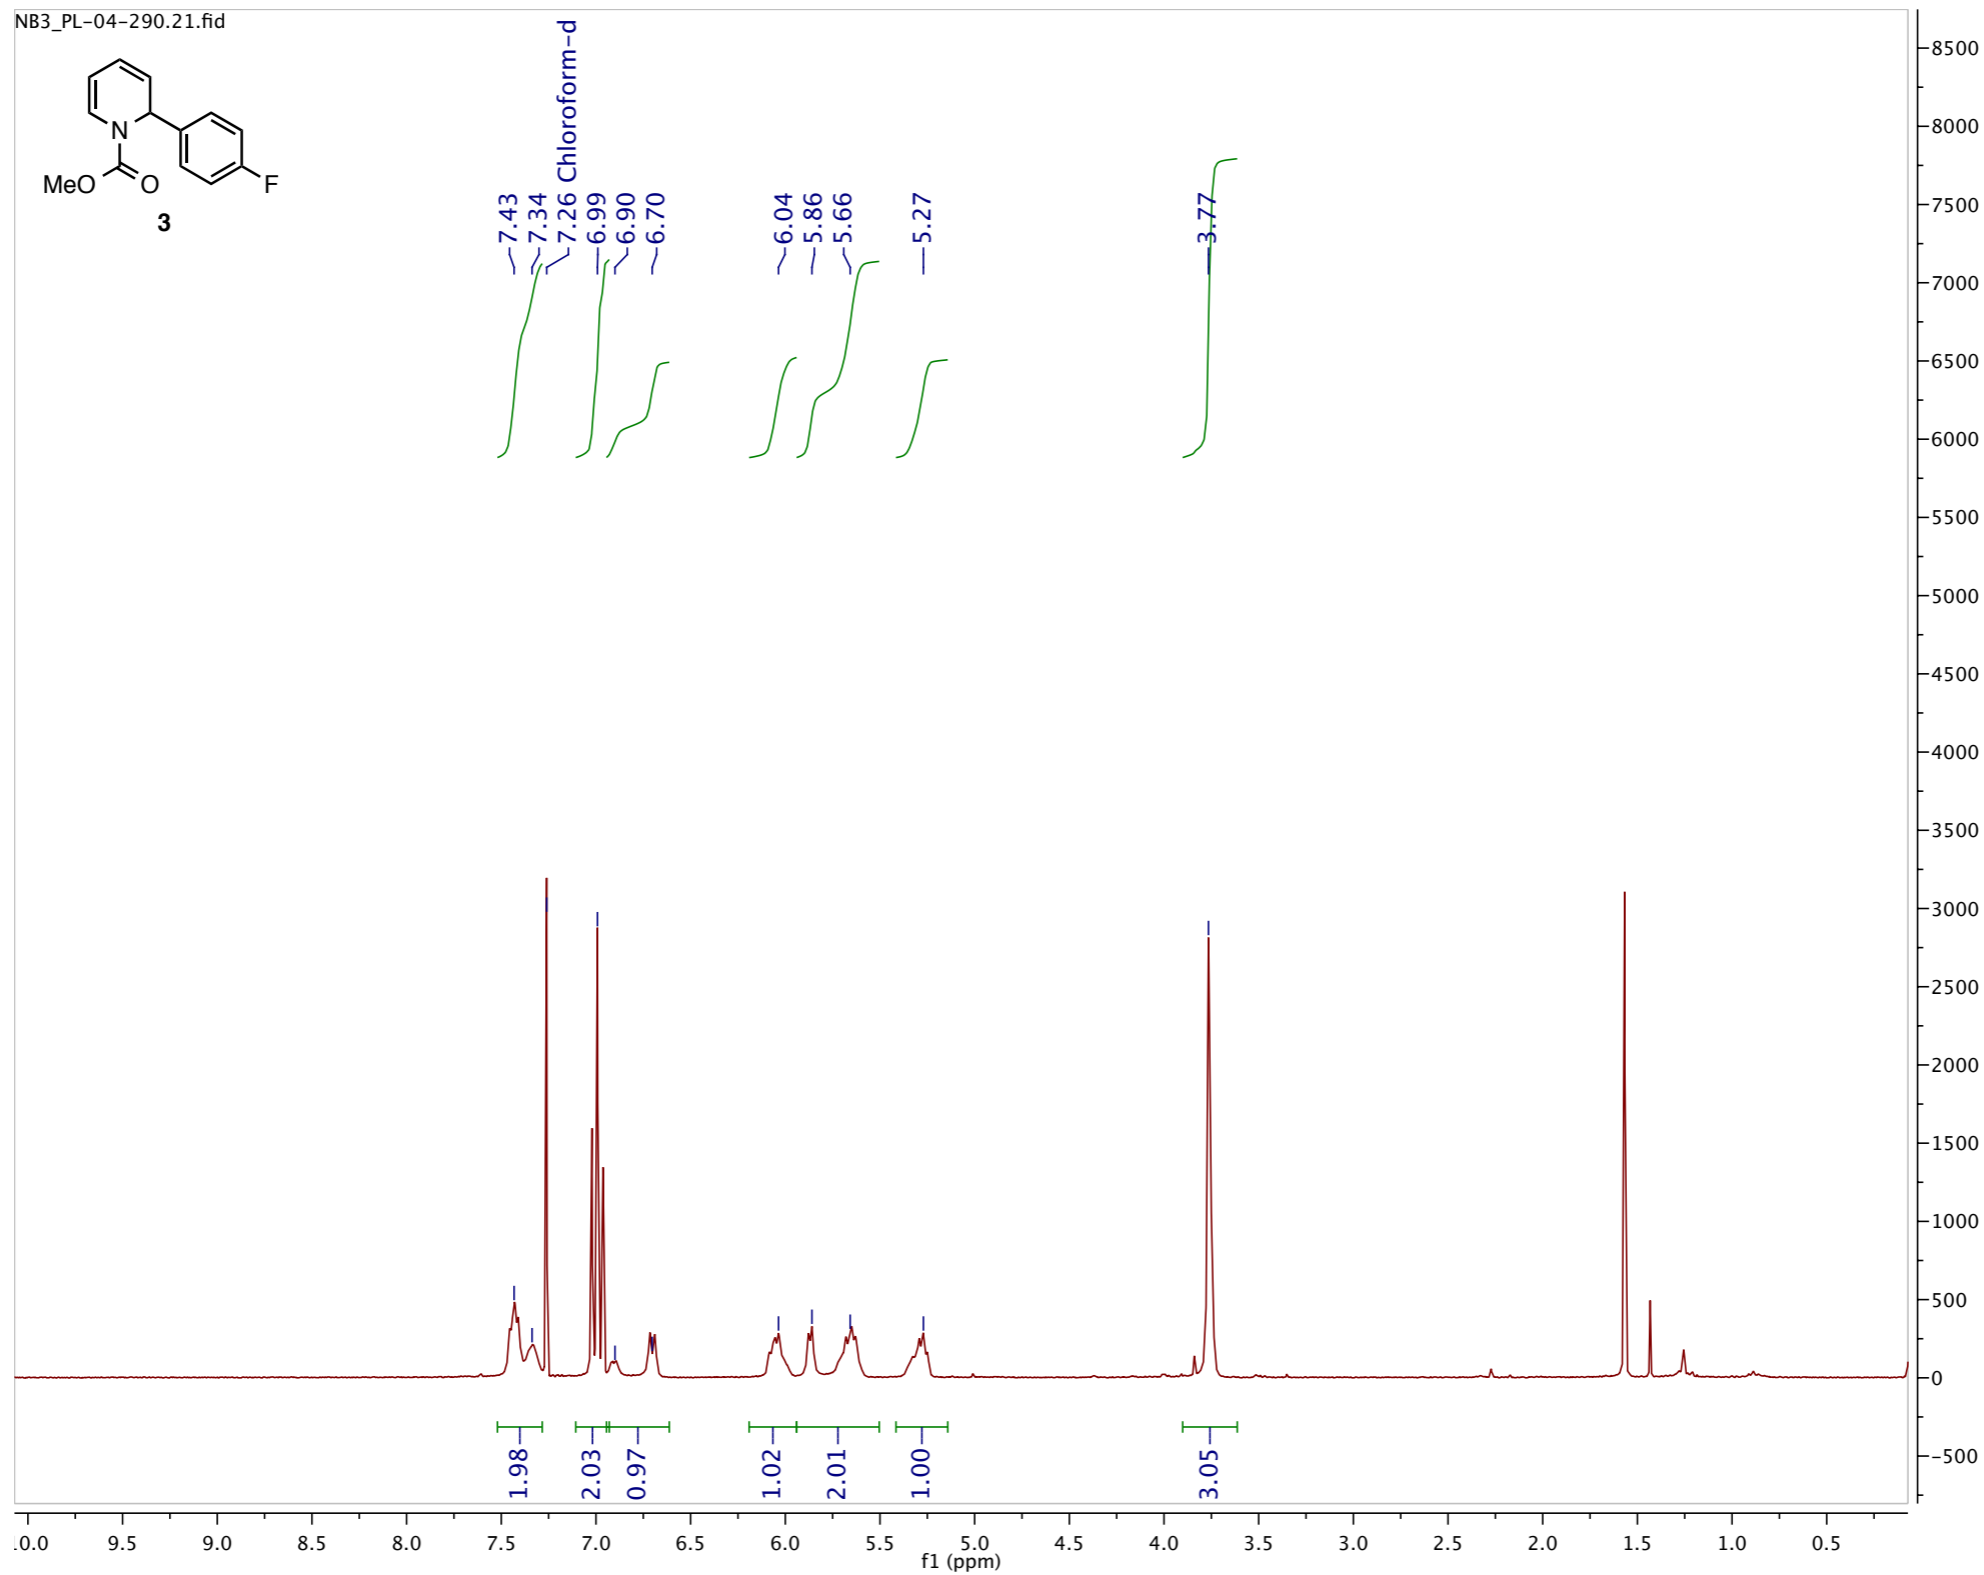

A2\_6-PL-05-247\_2\_carbon.10.fid  
C13CPDp1.PU CDCl3 /opt/topspin3.0 jlutz 6

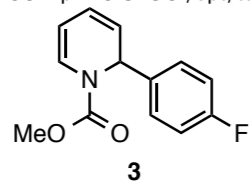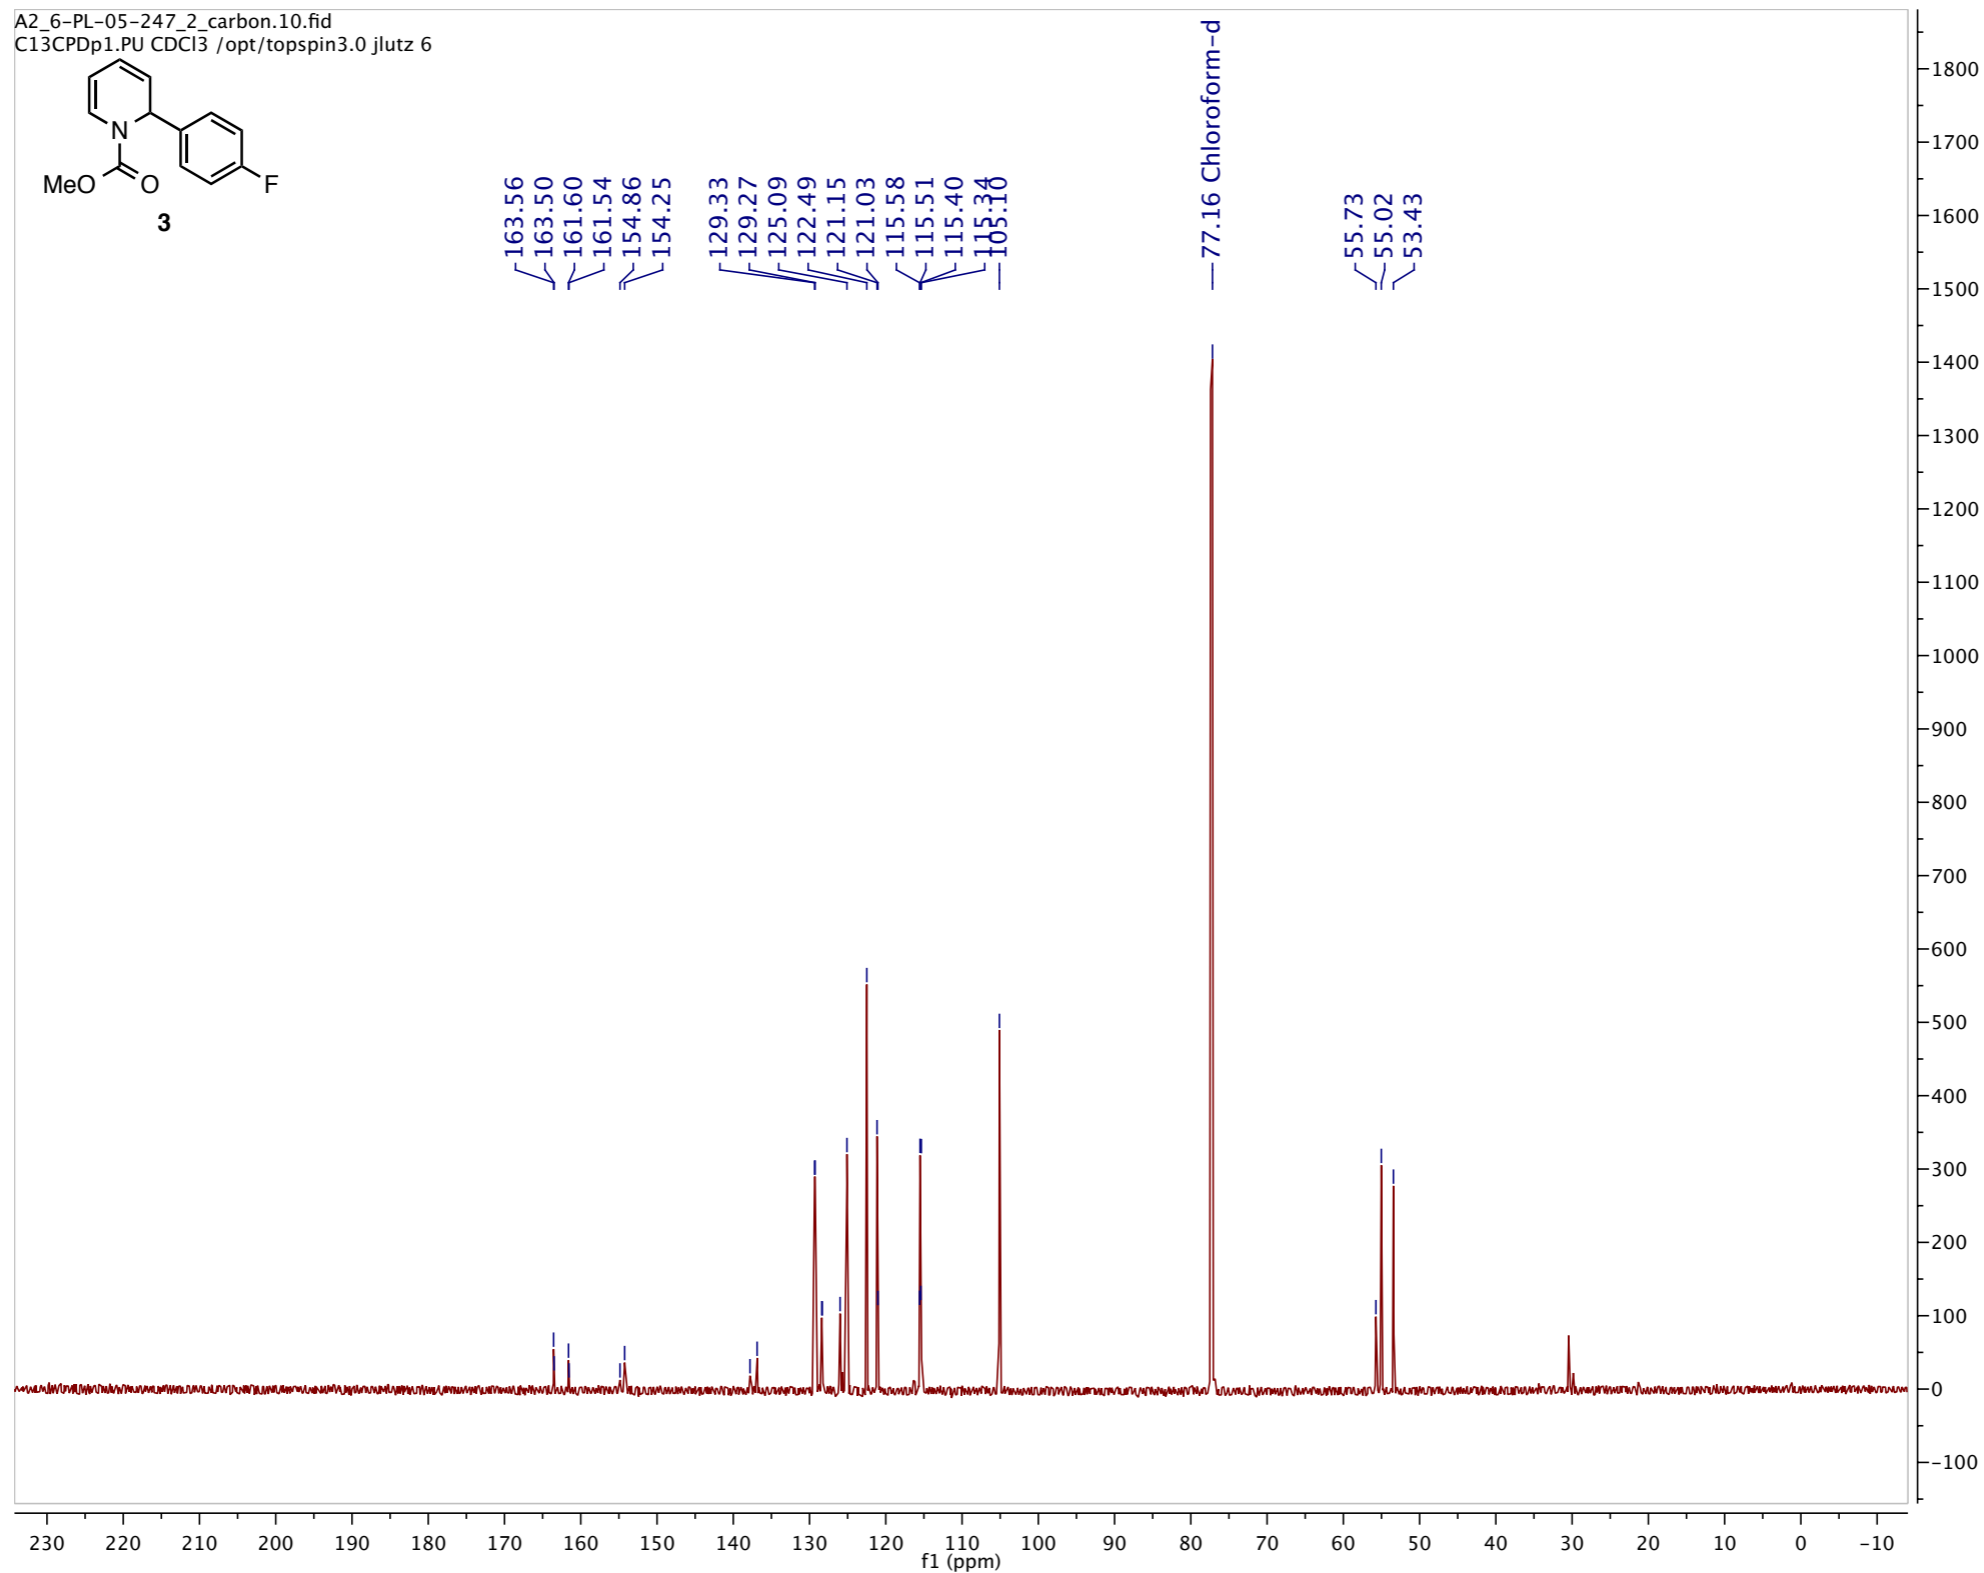

125 MHz <sup>13</sup>C-NMR spectrum of **3** in CDCl<sub>3</sub>

NB3\_PL-04-290.20.fid

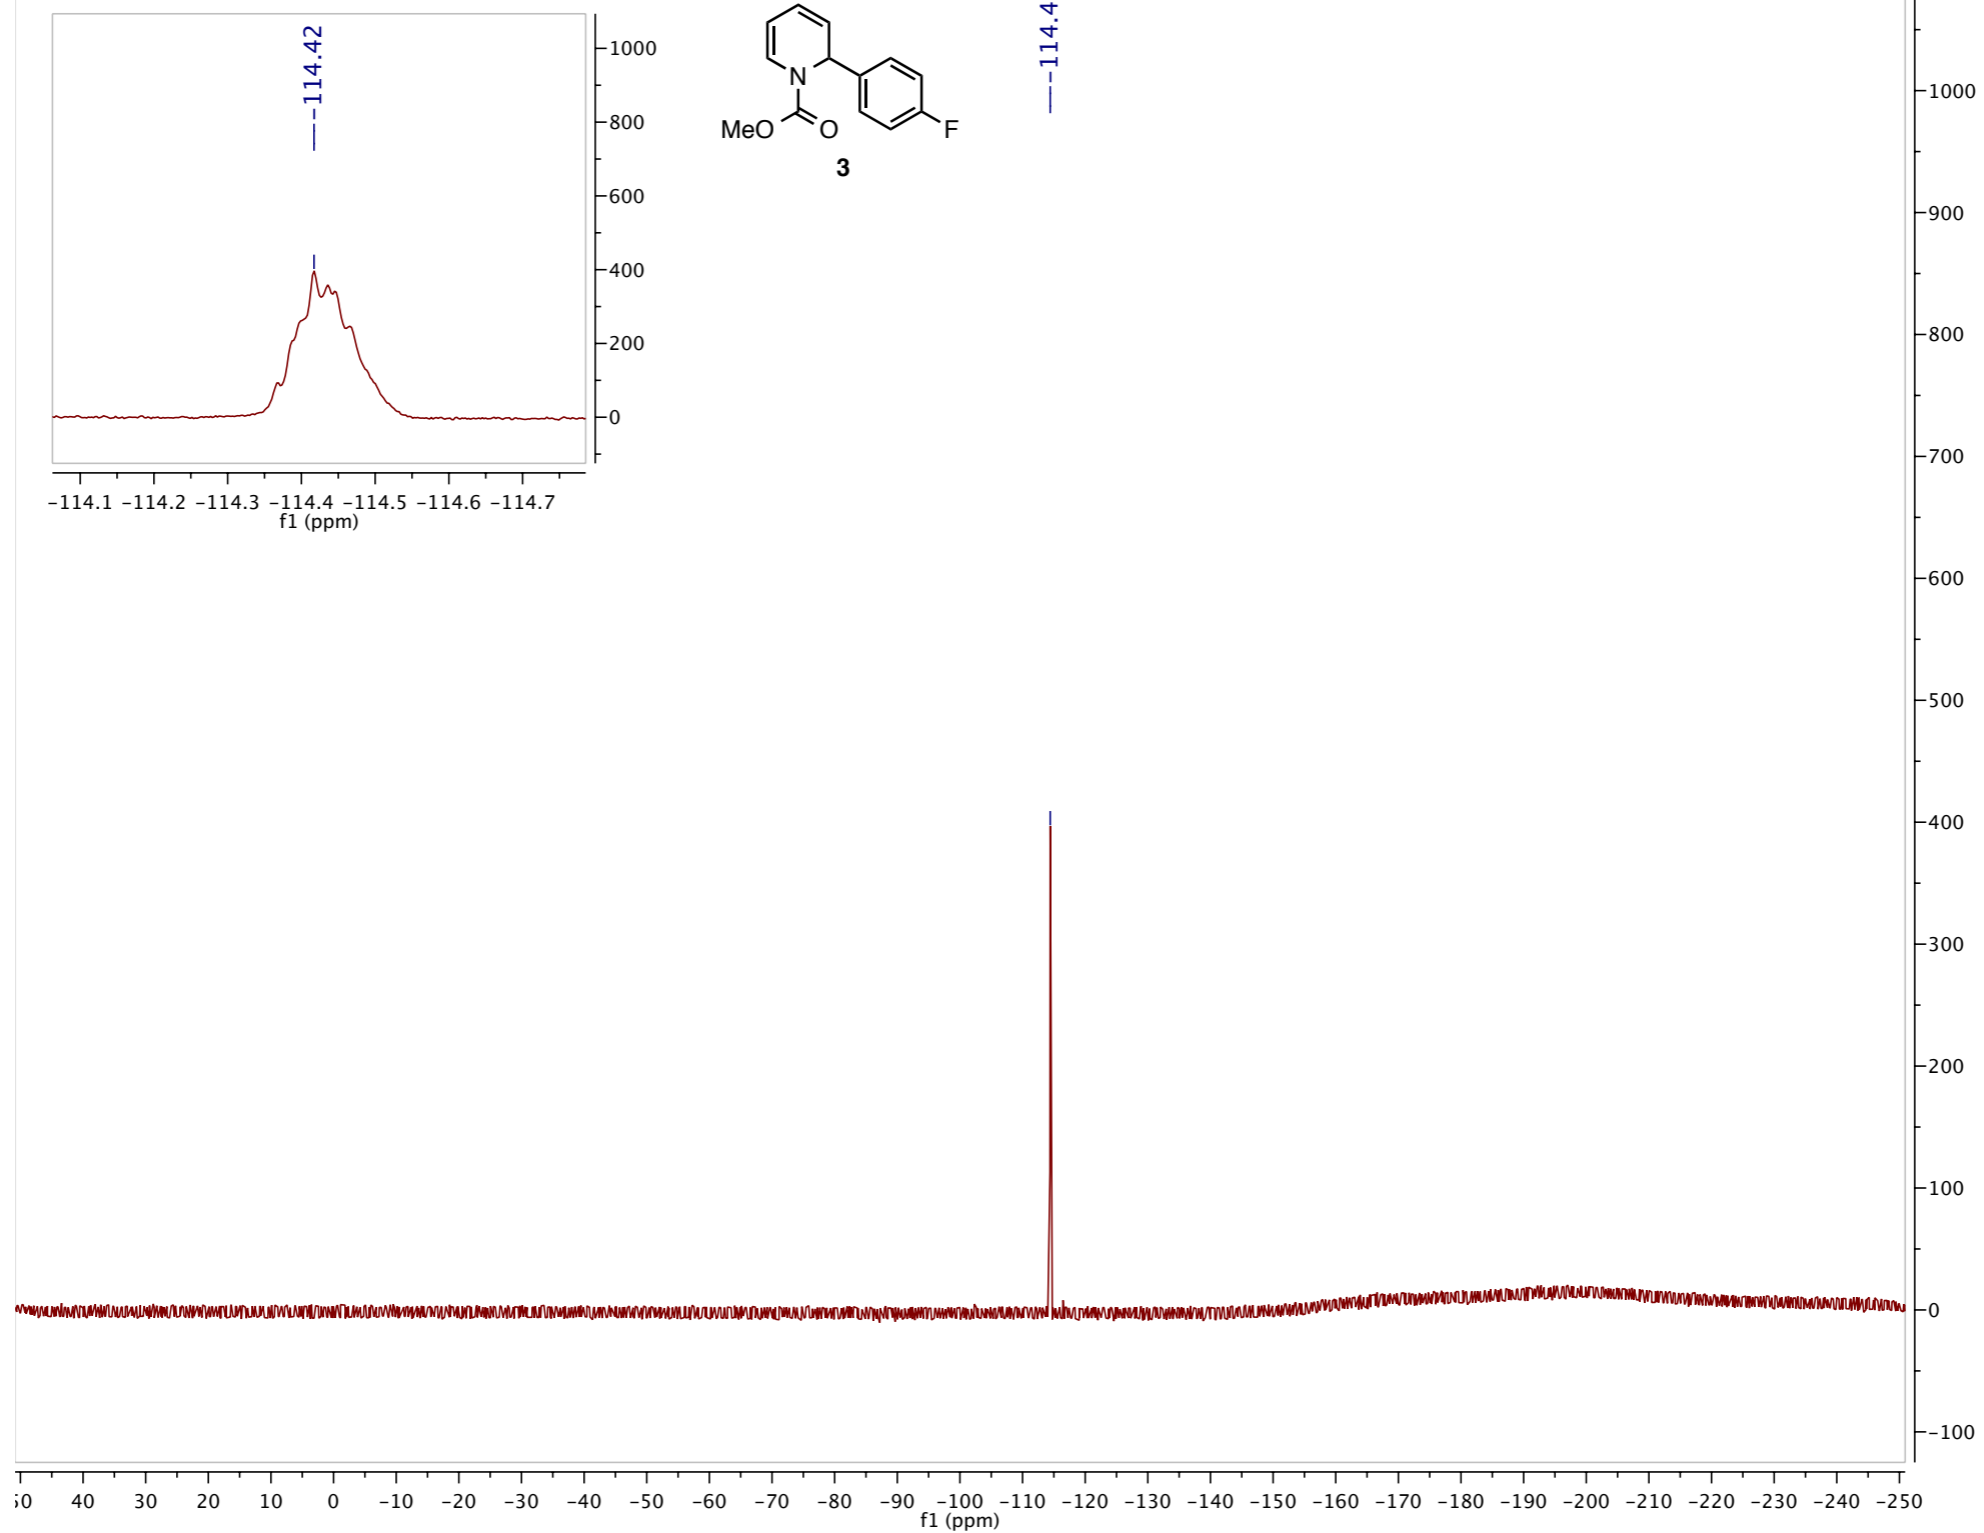

282 MHz  $^{19}\text{F}$ -NMR spectrum of **3** in  $\text{CDCl}_3$

A2\_20-PL-05-252A\_proton.10.fid  
PROTON.PU CDCl3 /opt/topspin3.0 jlutz 20

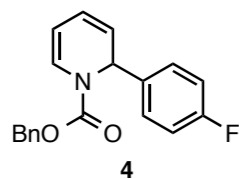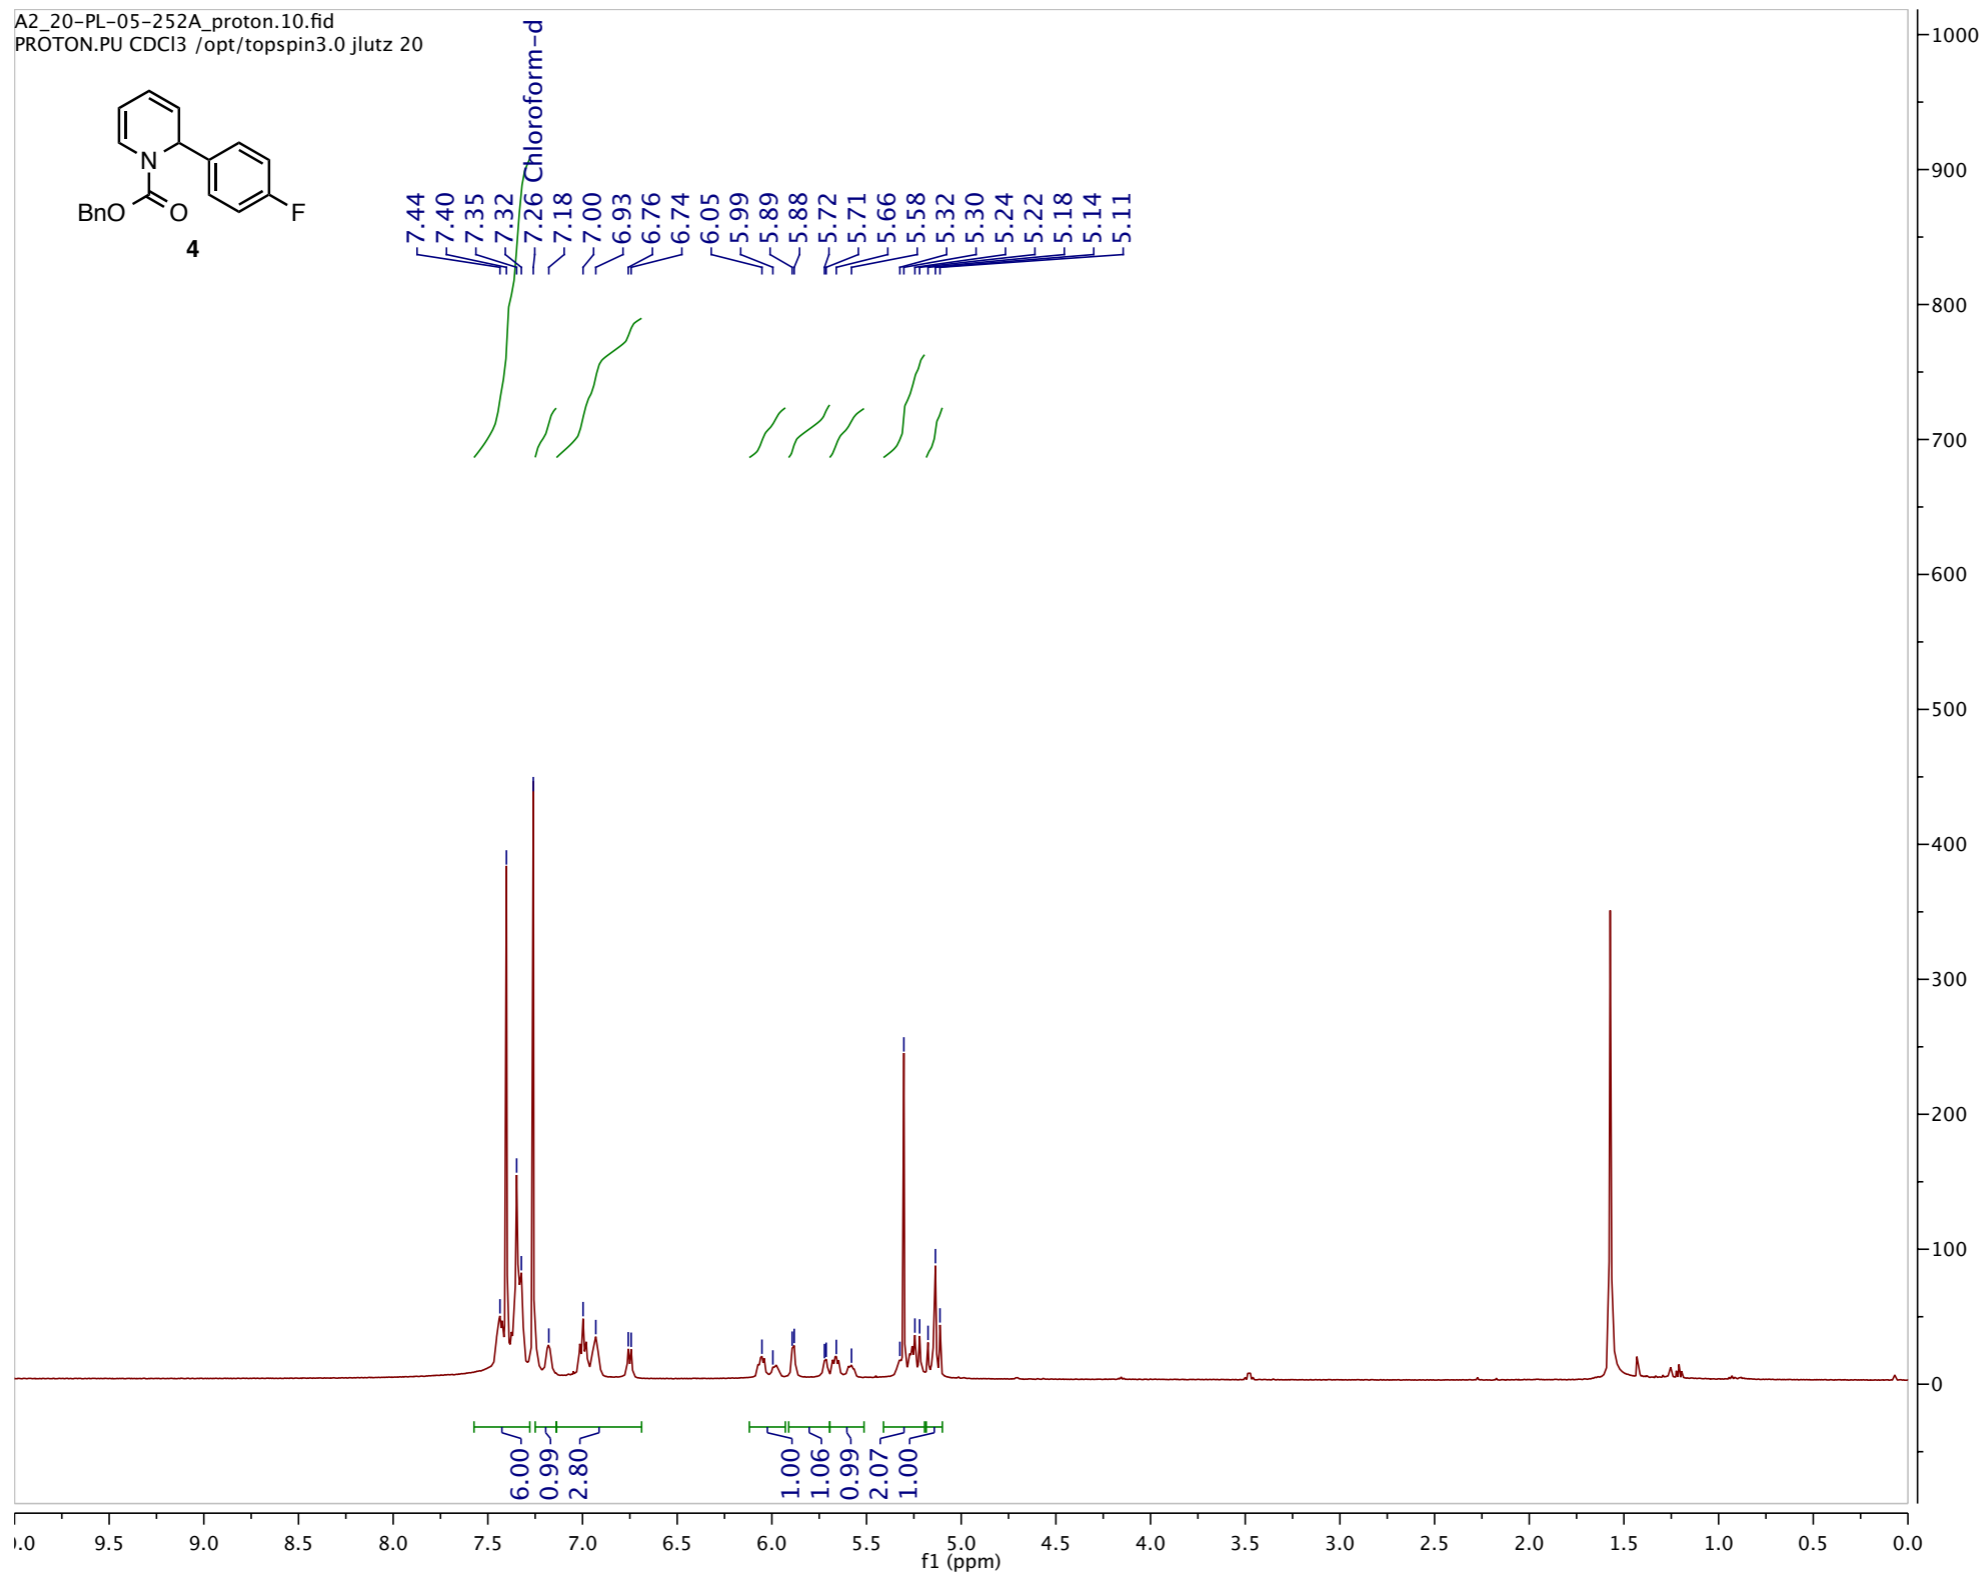

500 MHz <sup>1</sup>H-NMR spectrum of **4** in CDCl<sub>3</sub>

A2\_20-PL-05-252A\_carbon.10.fid  
C13CPDp1.PU CDCl3 /opt/topspin3.0 jlutz 20

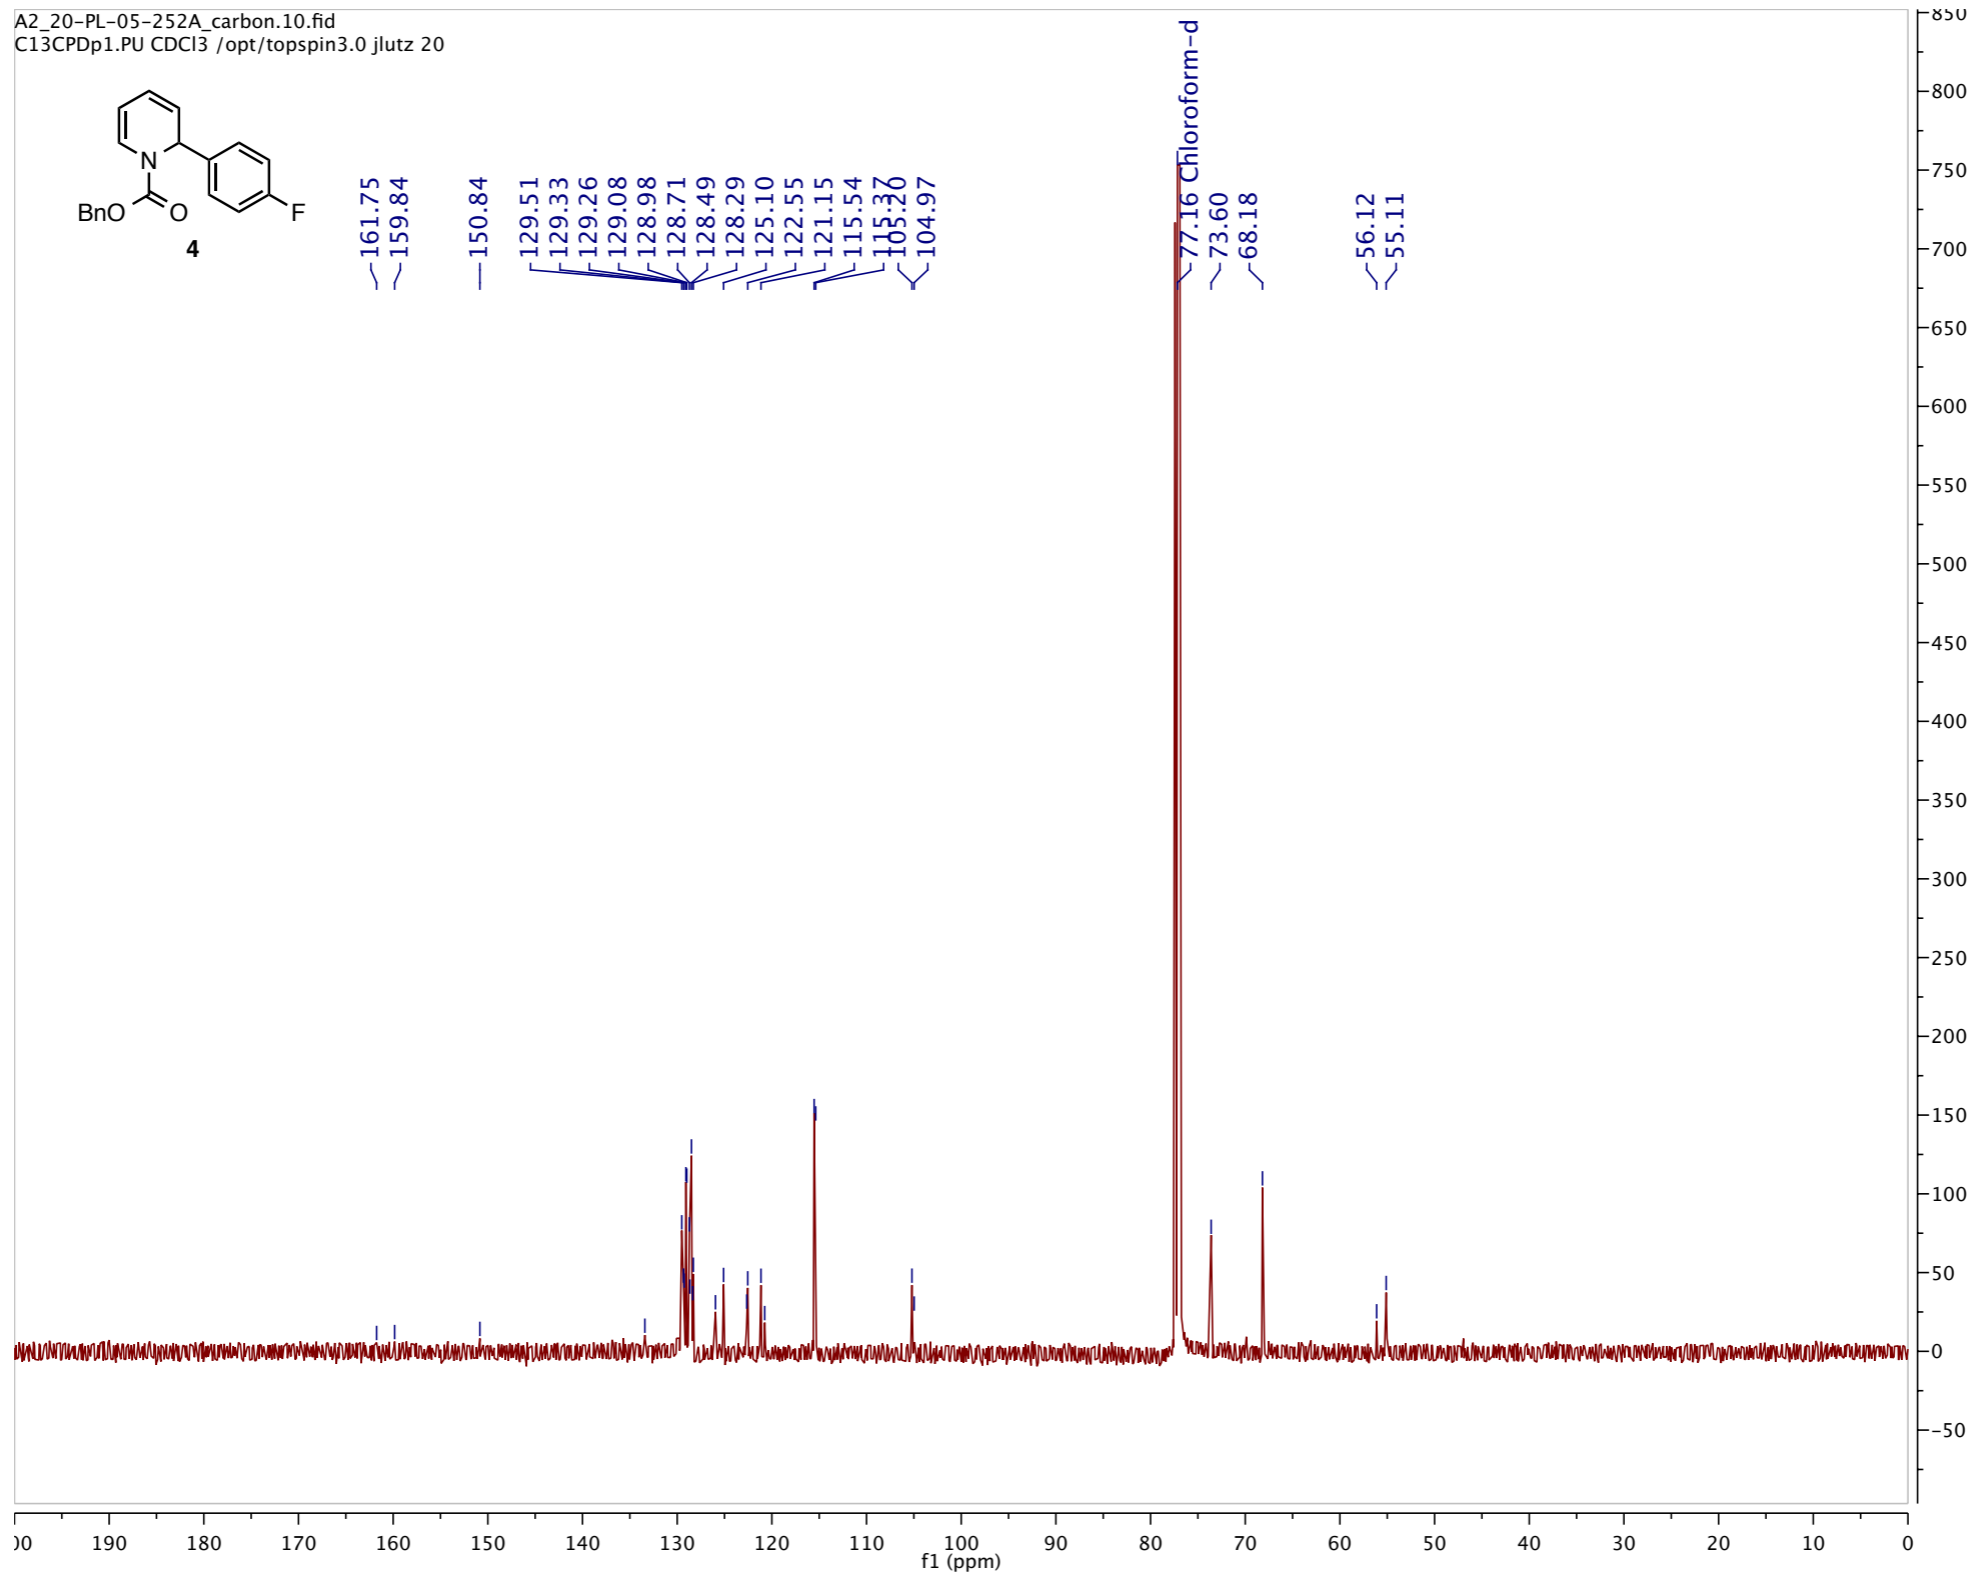

125 MHz  $^{13}\text{C}$ -NMR spectrum of 4 in  $\text{CDCl}_3$

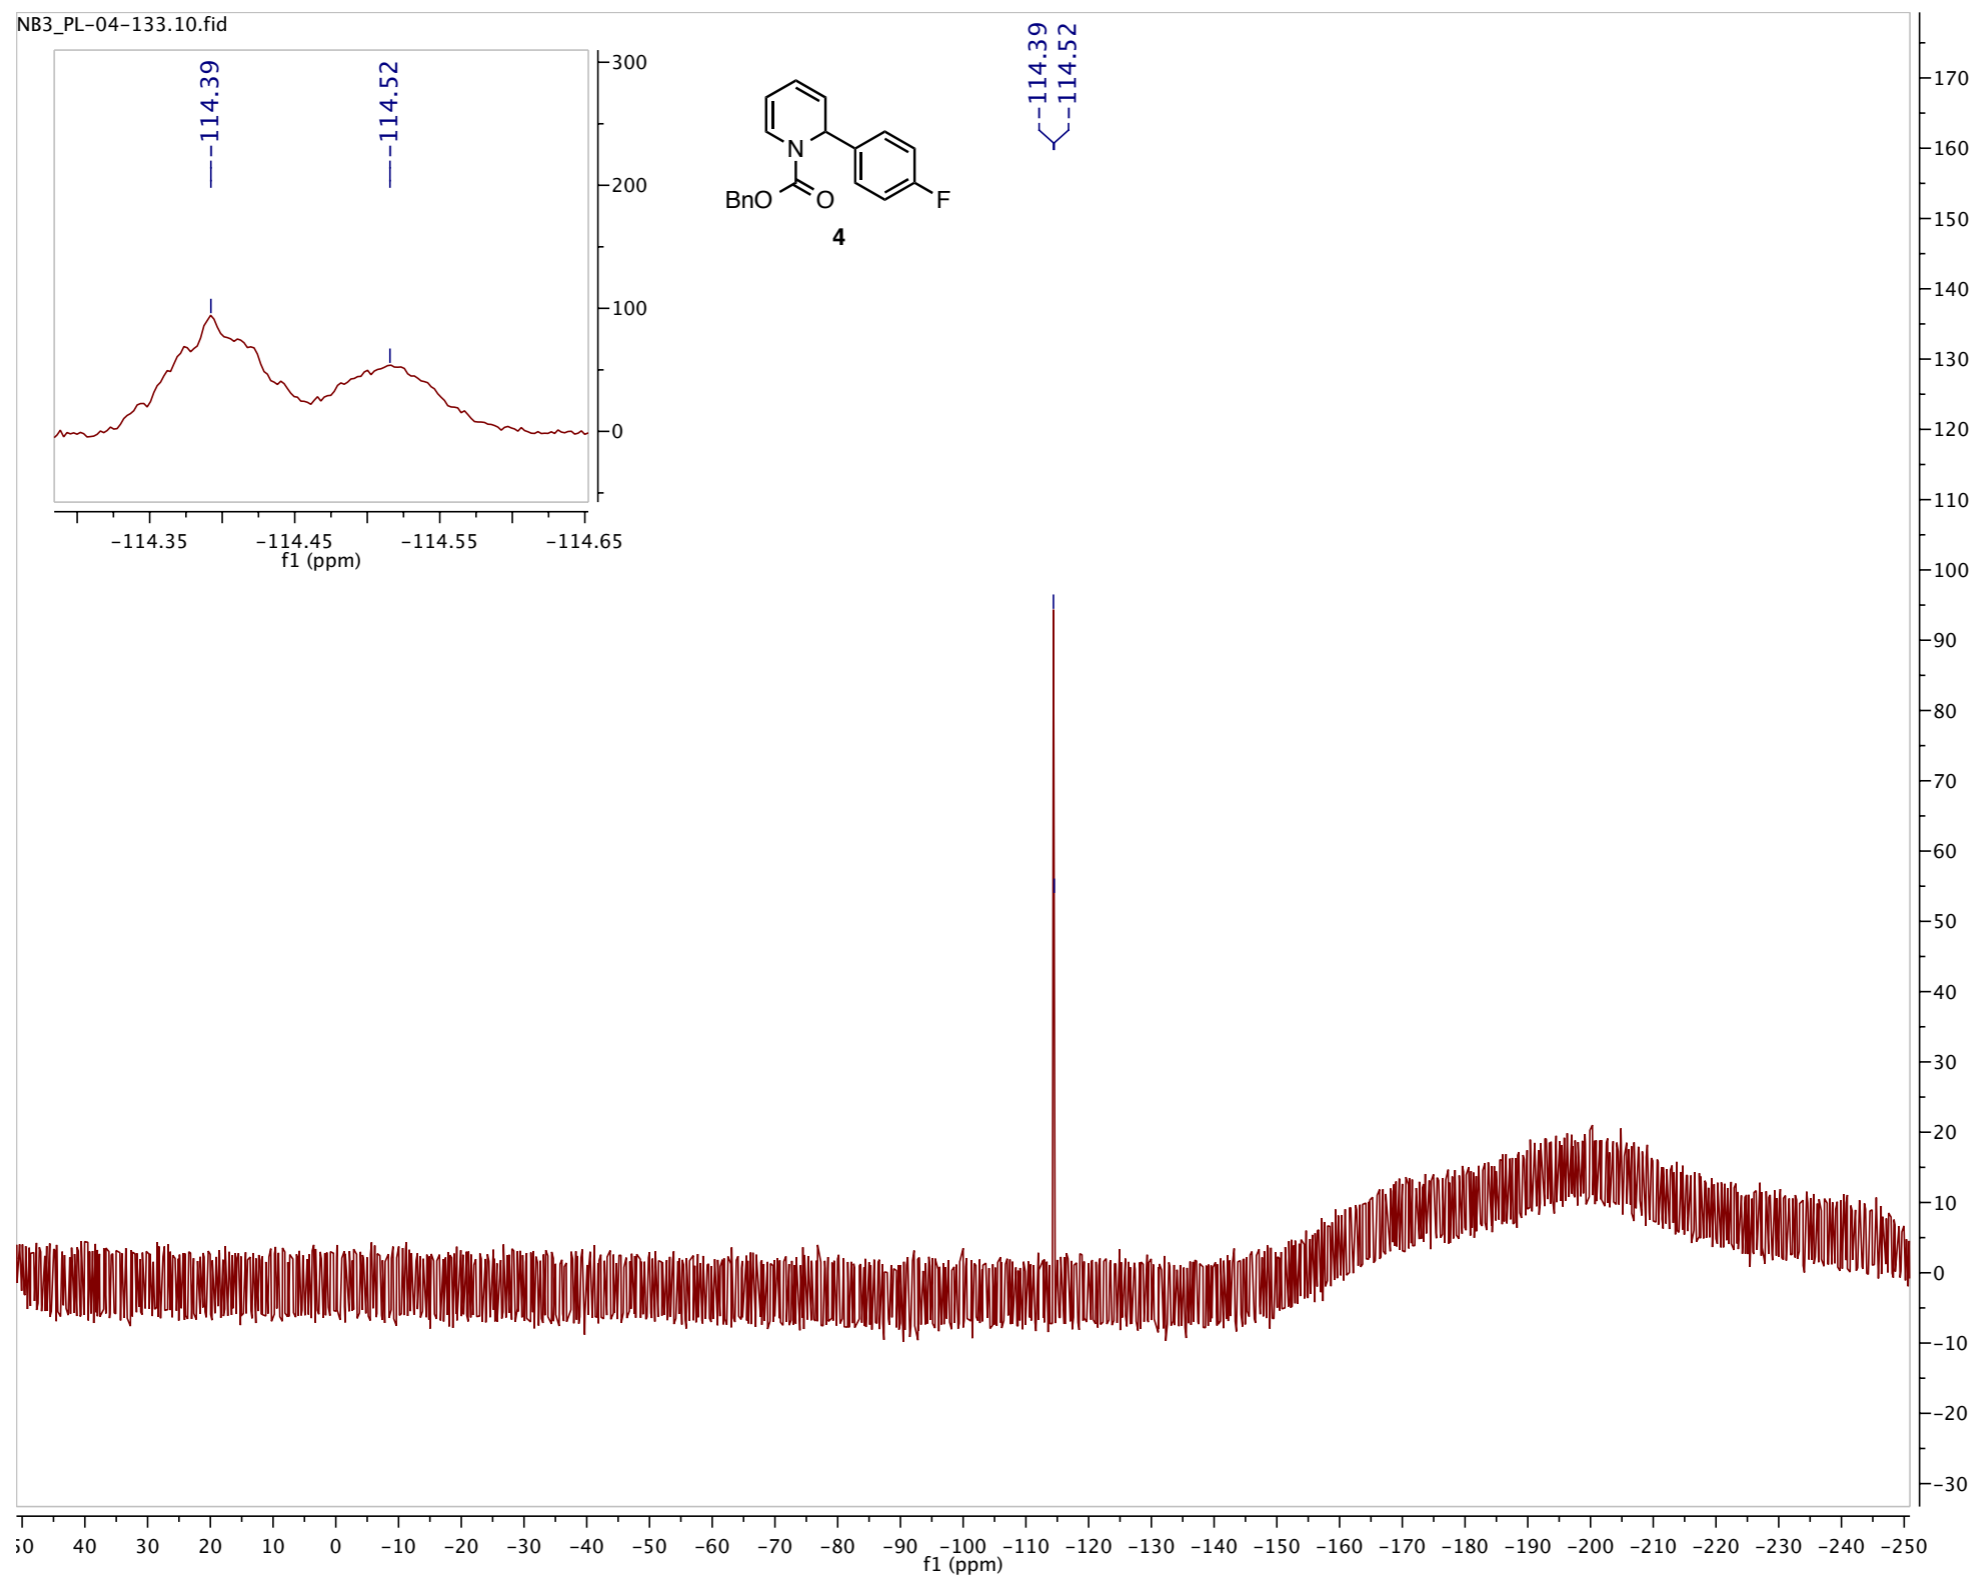



A2\_28-PL-05-247\_6\_proton.10.fid  
PROTON.PU CDCl3 /opt/topspin3.0 jlutz 28

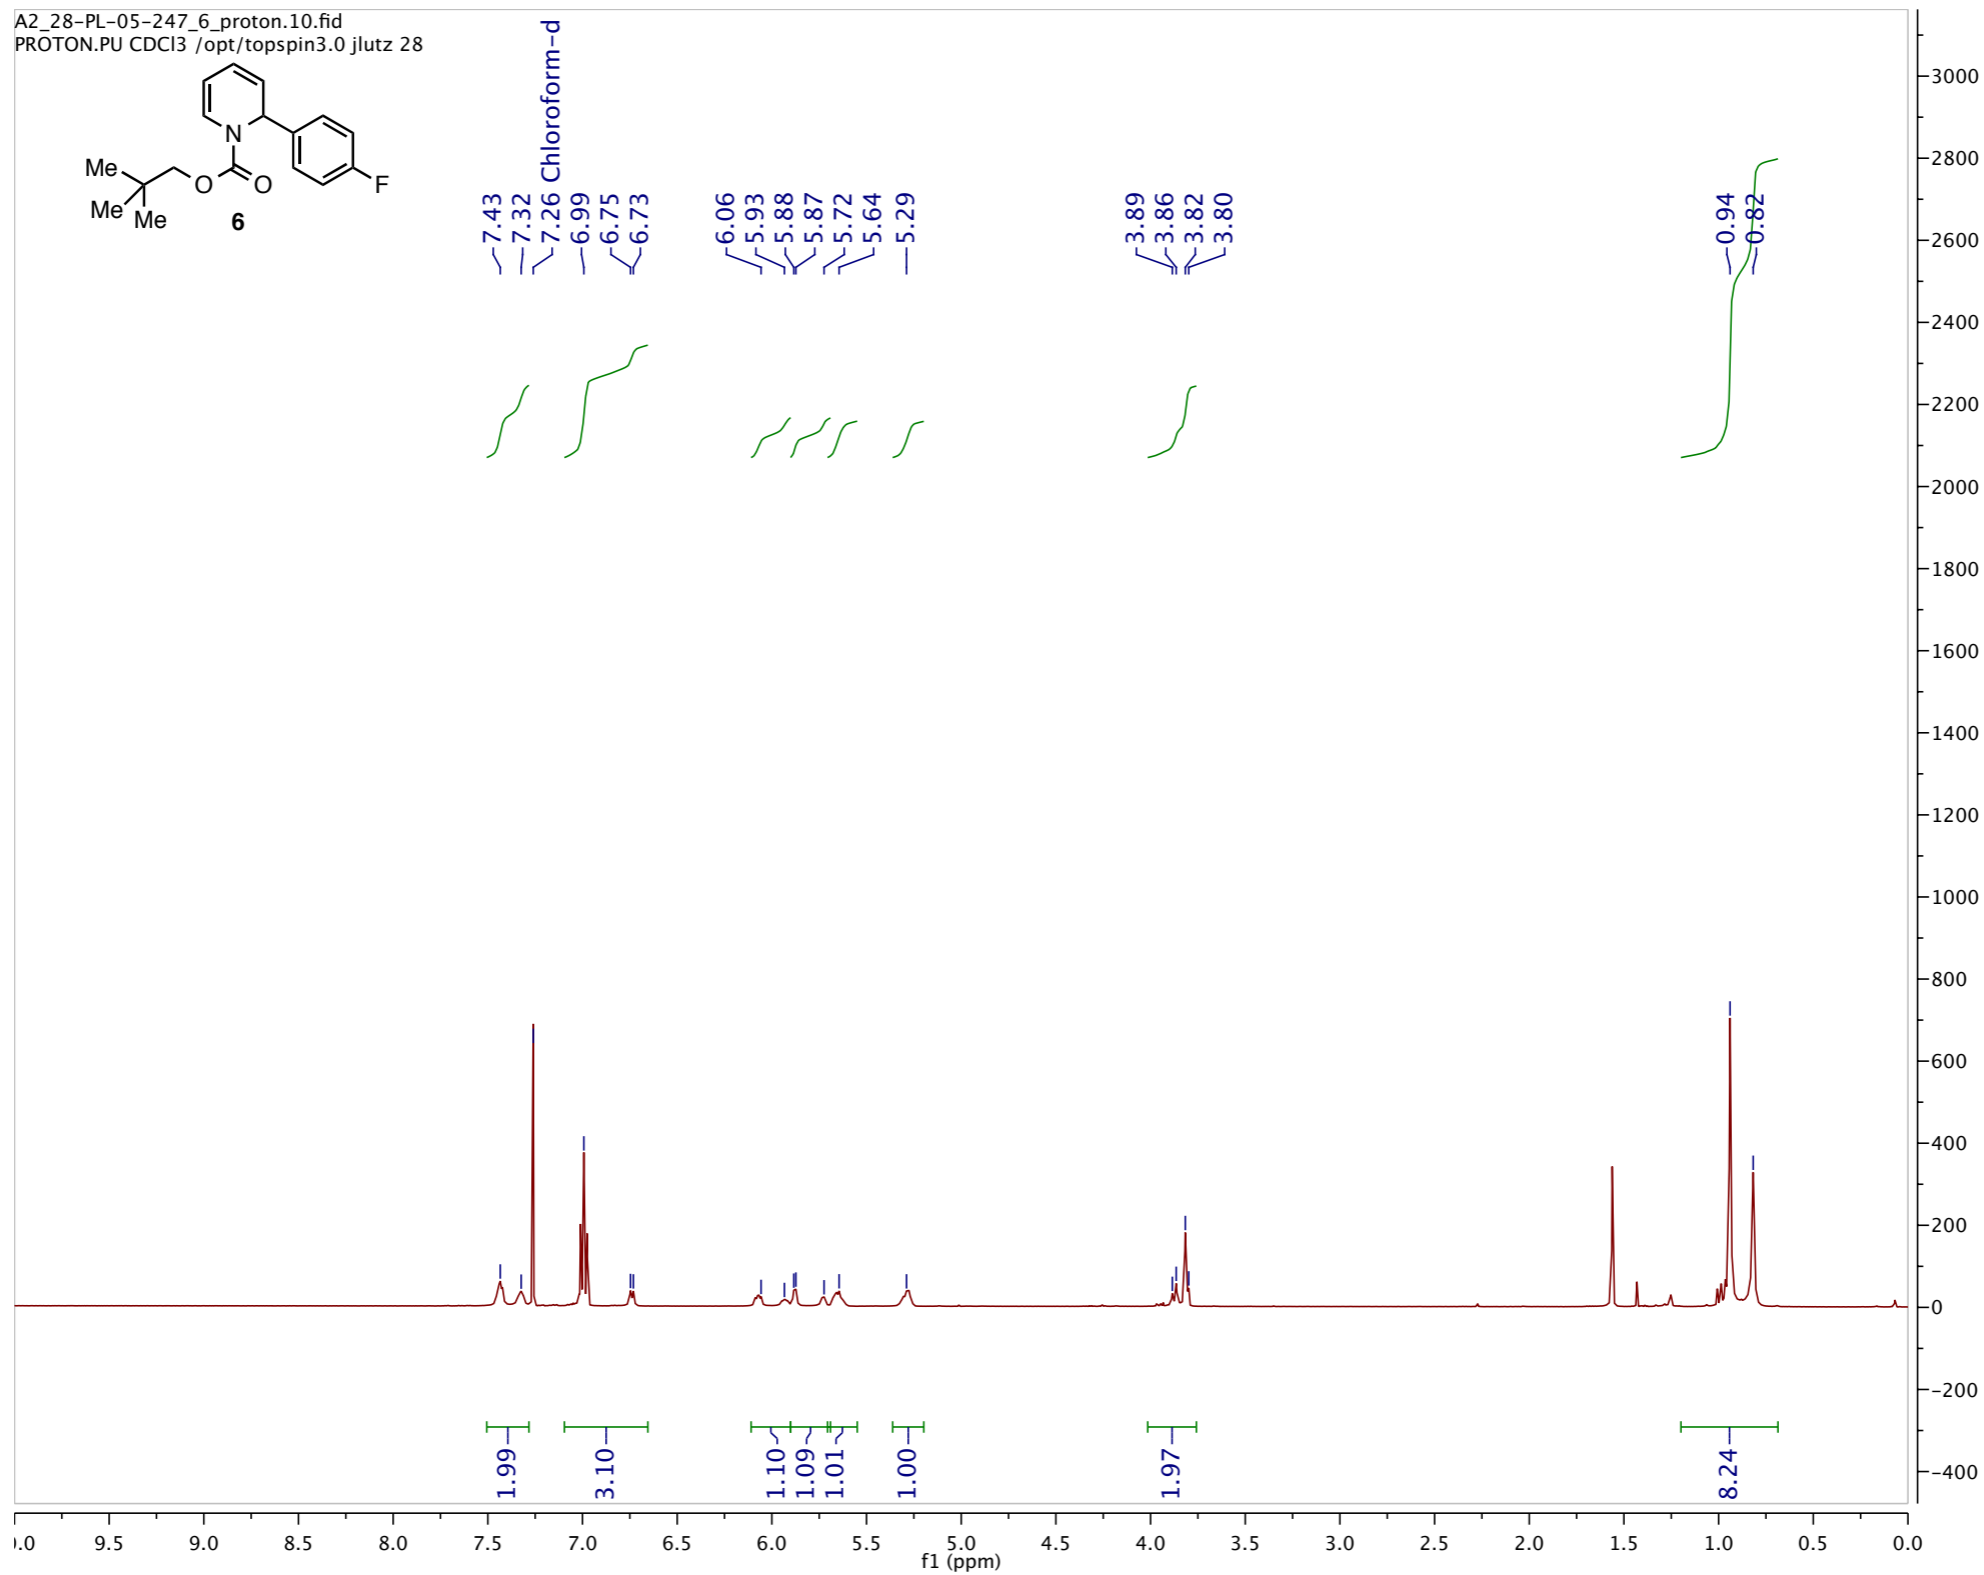

A2\_28-PL-05-247\_6\_carbon.10.fid  
C13CPDp1.PU CDCl3 /opt/topspin3.0 jlutz 28

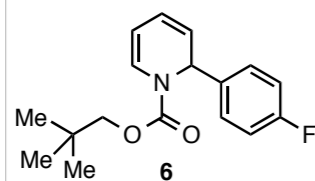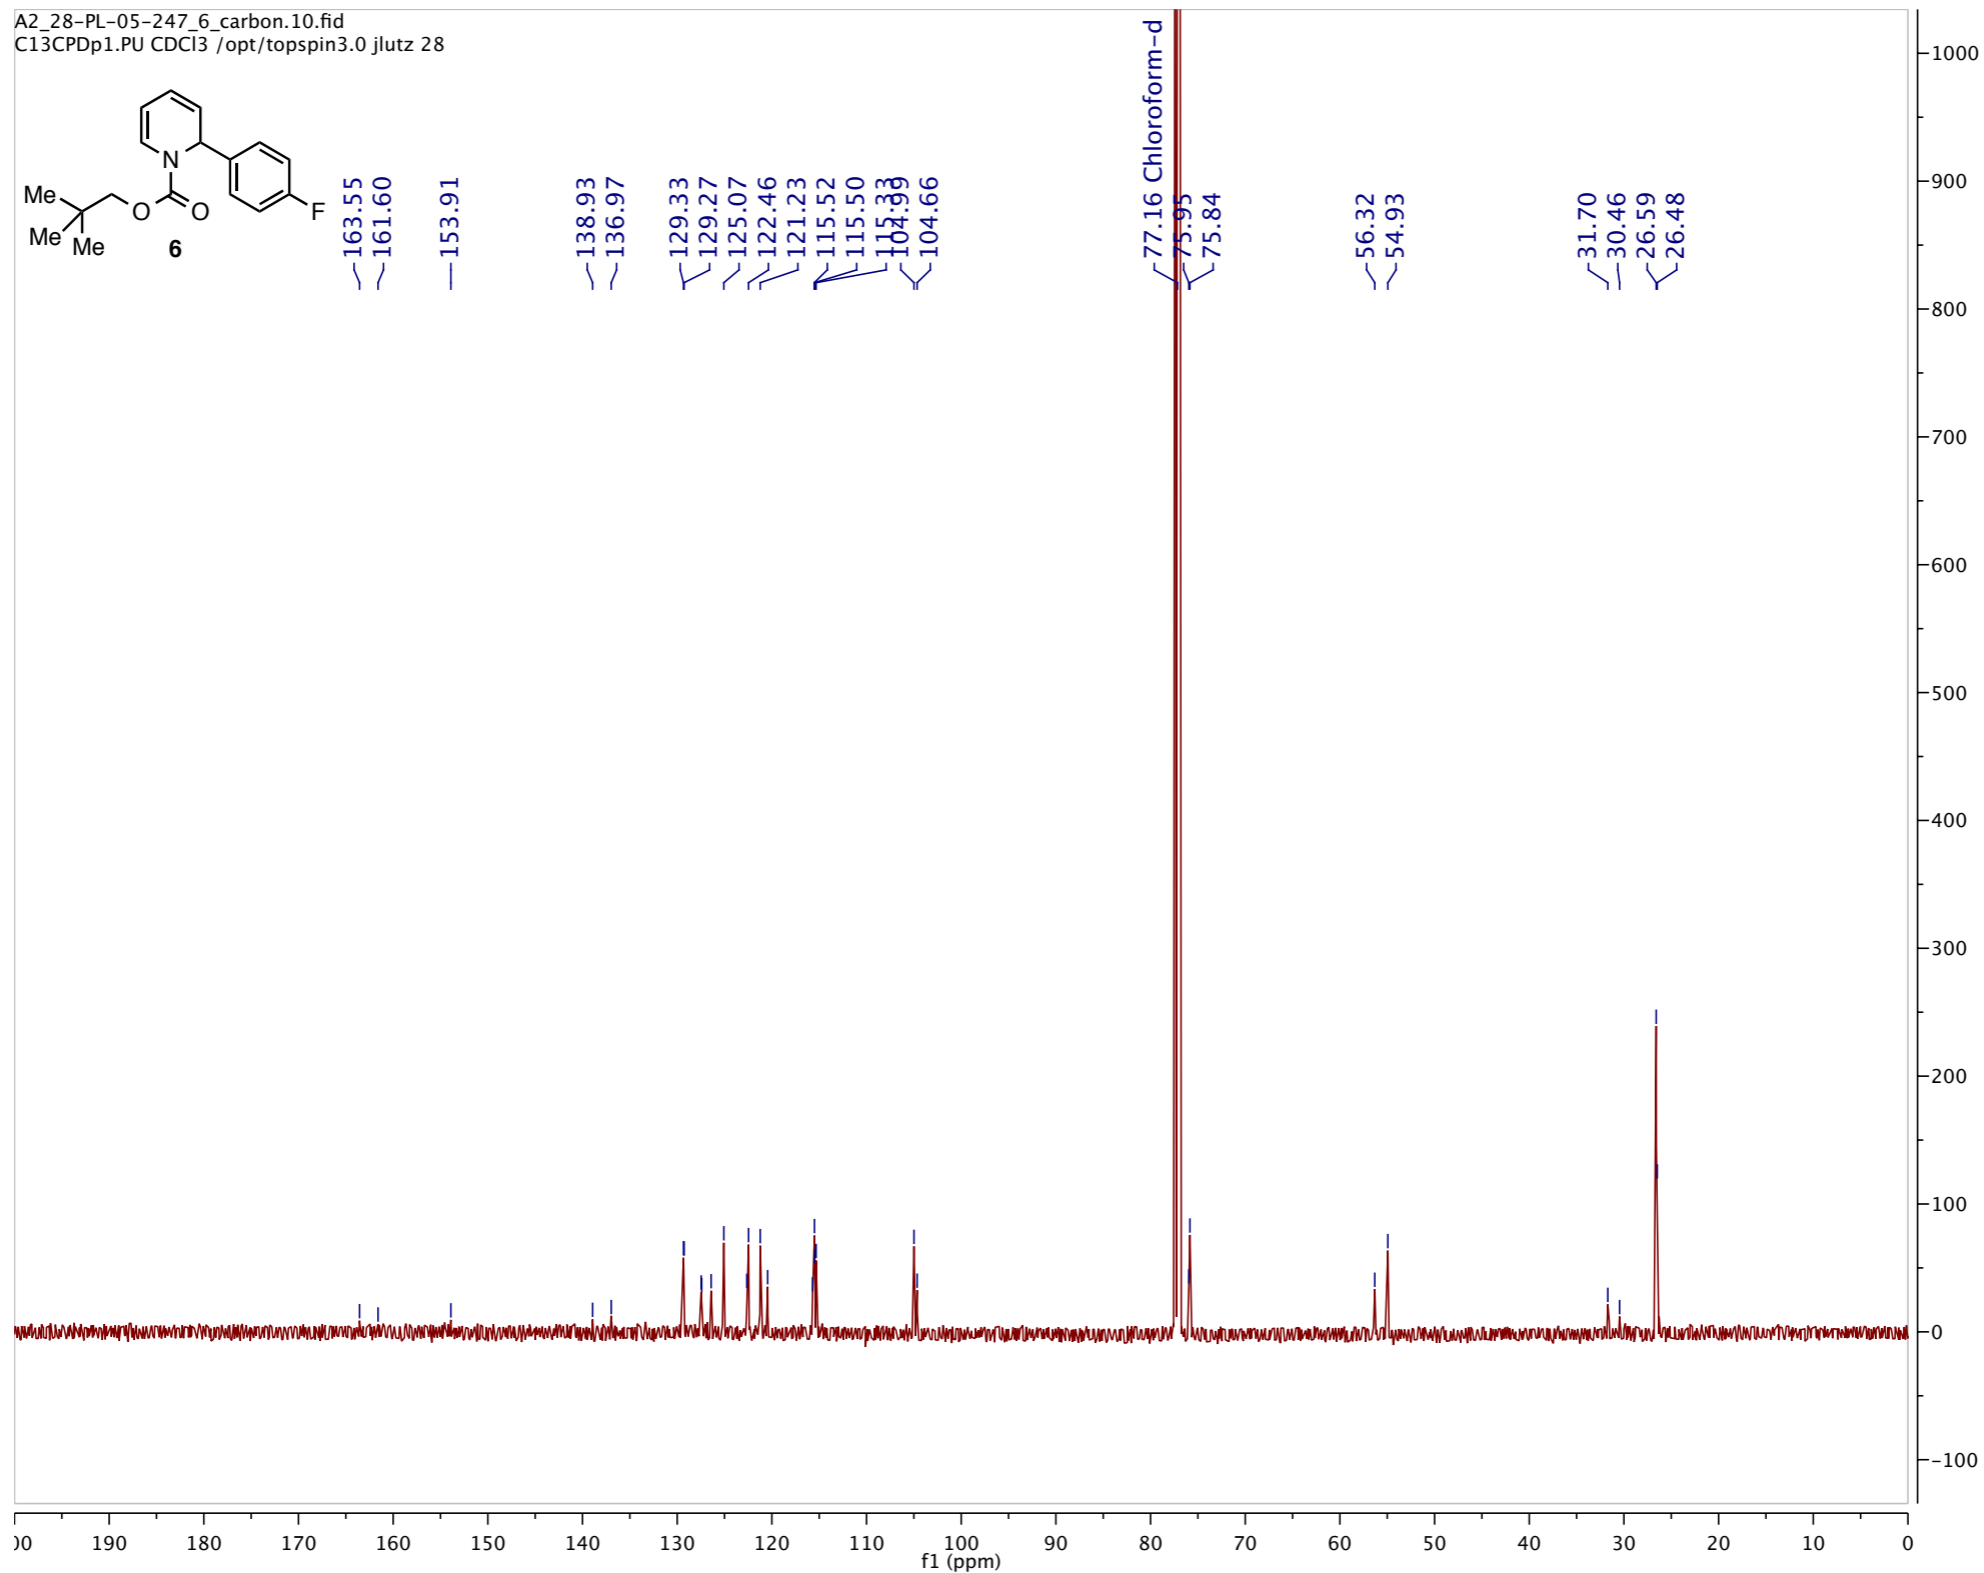

125 MHz <sup>13</sup>C-NMR spectrum of **6** in CDCl<sub>3</sub>

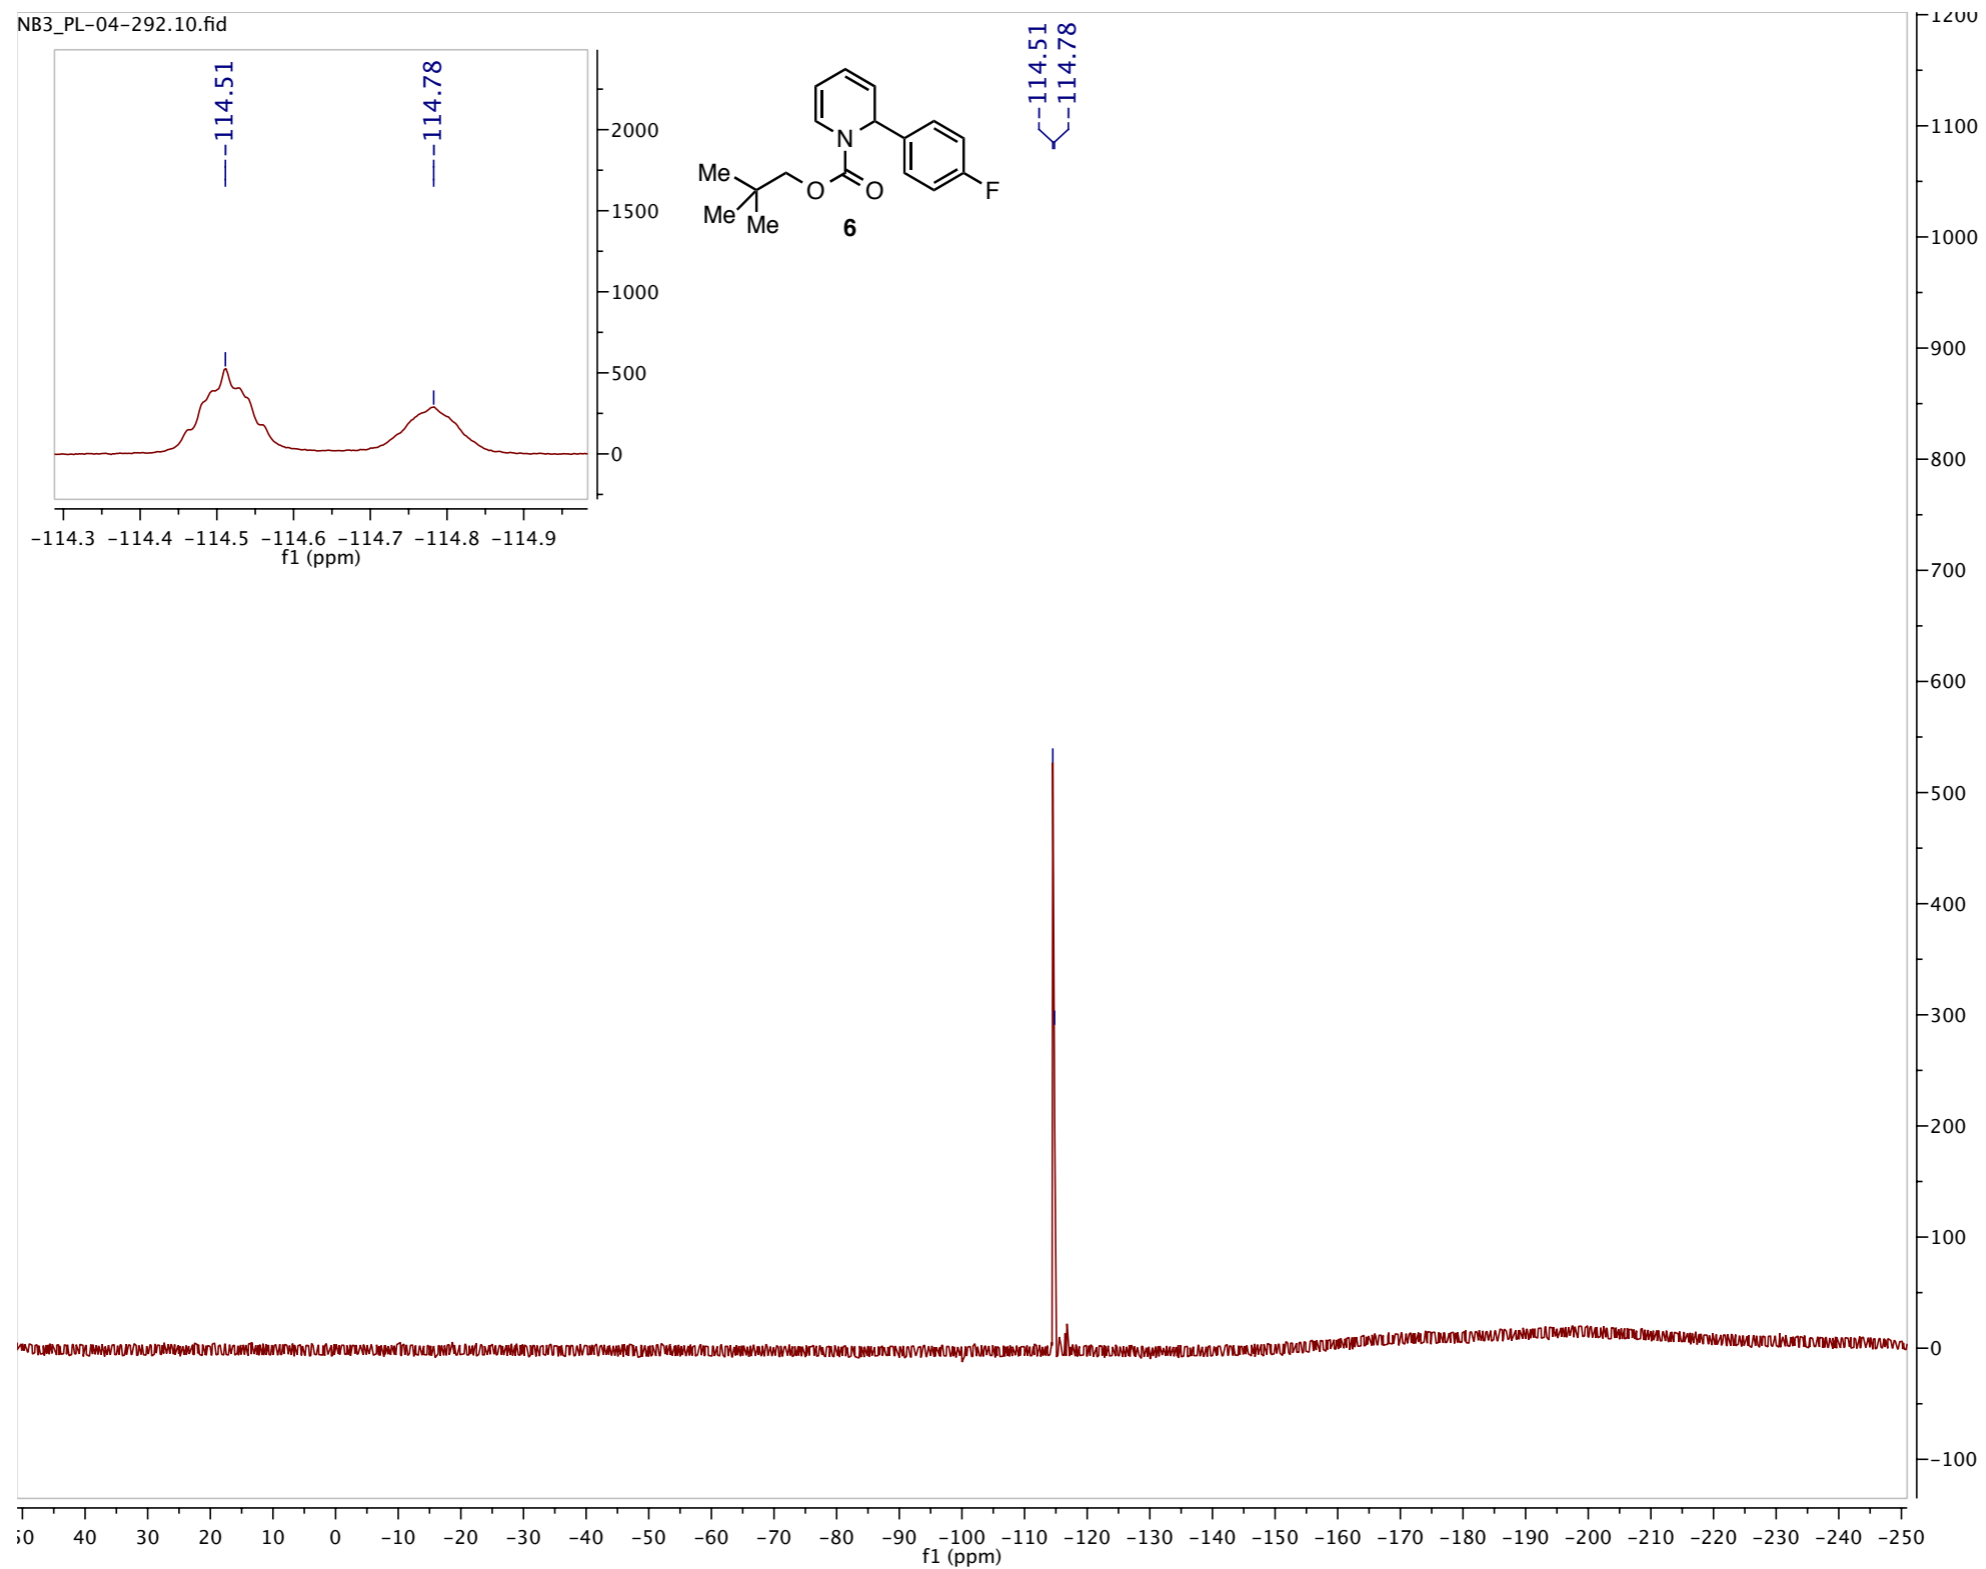

NB3\_PL-03-150.11.fid

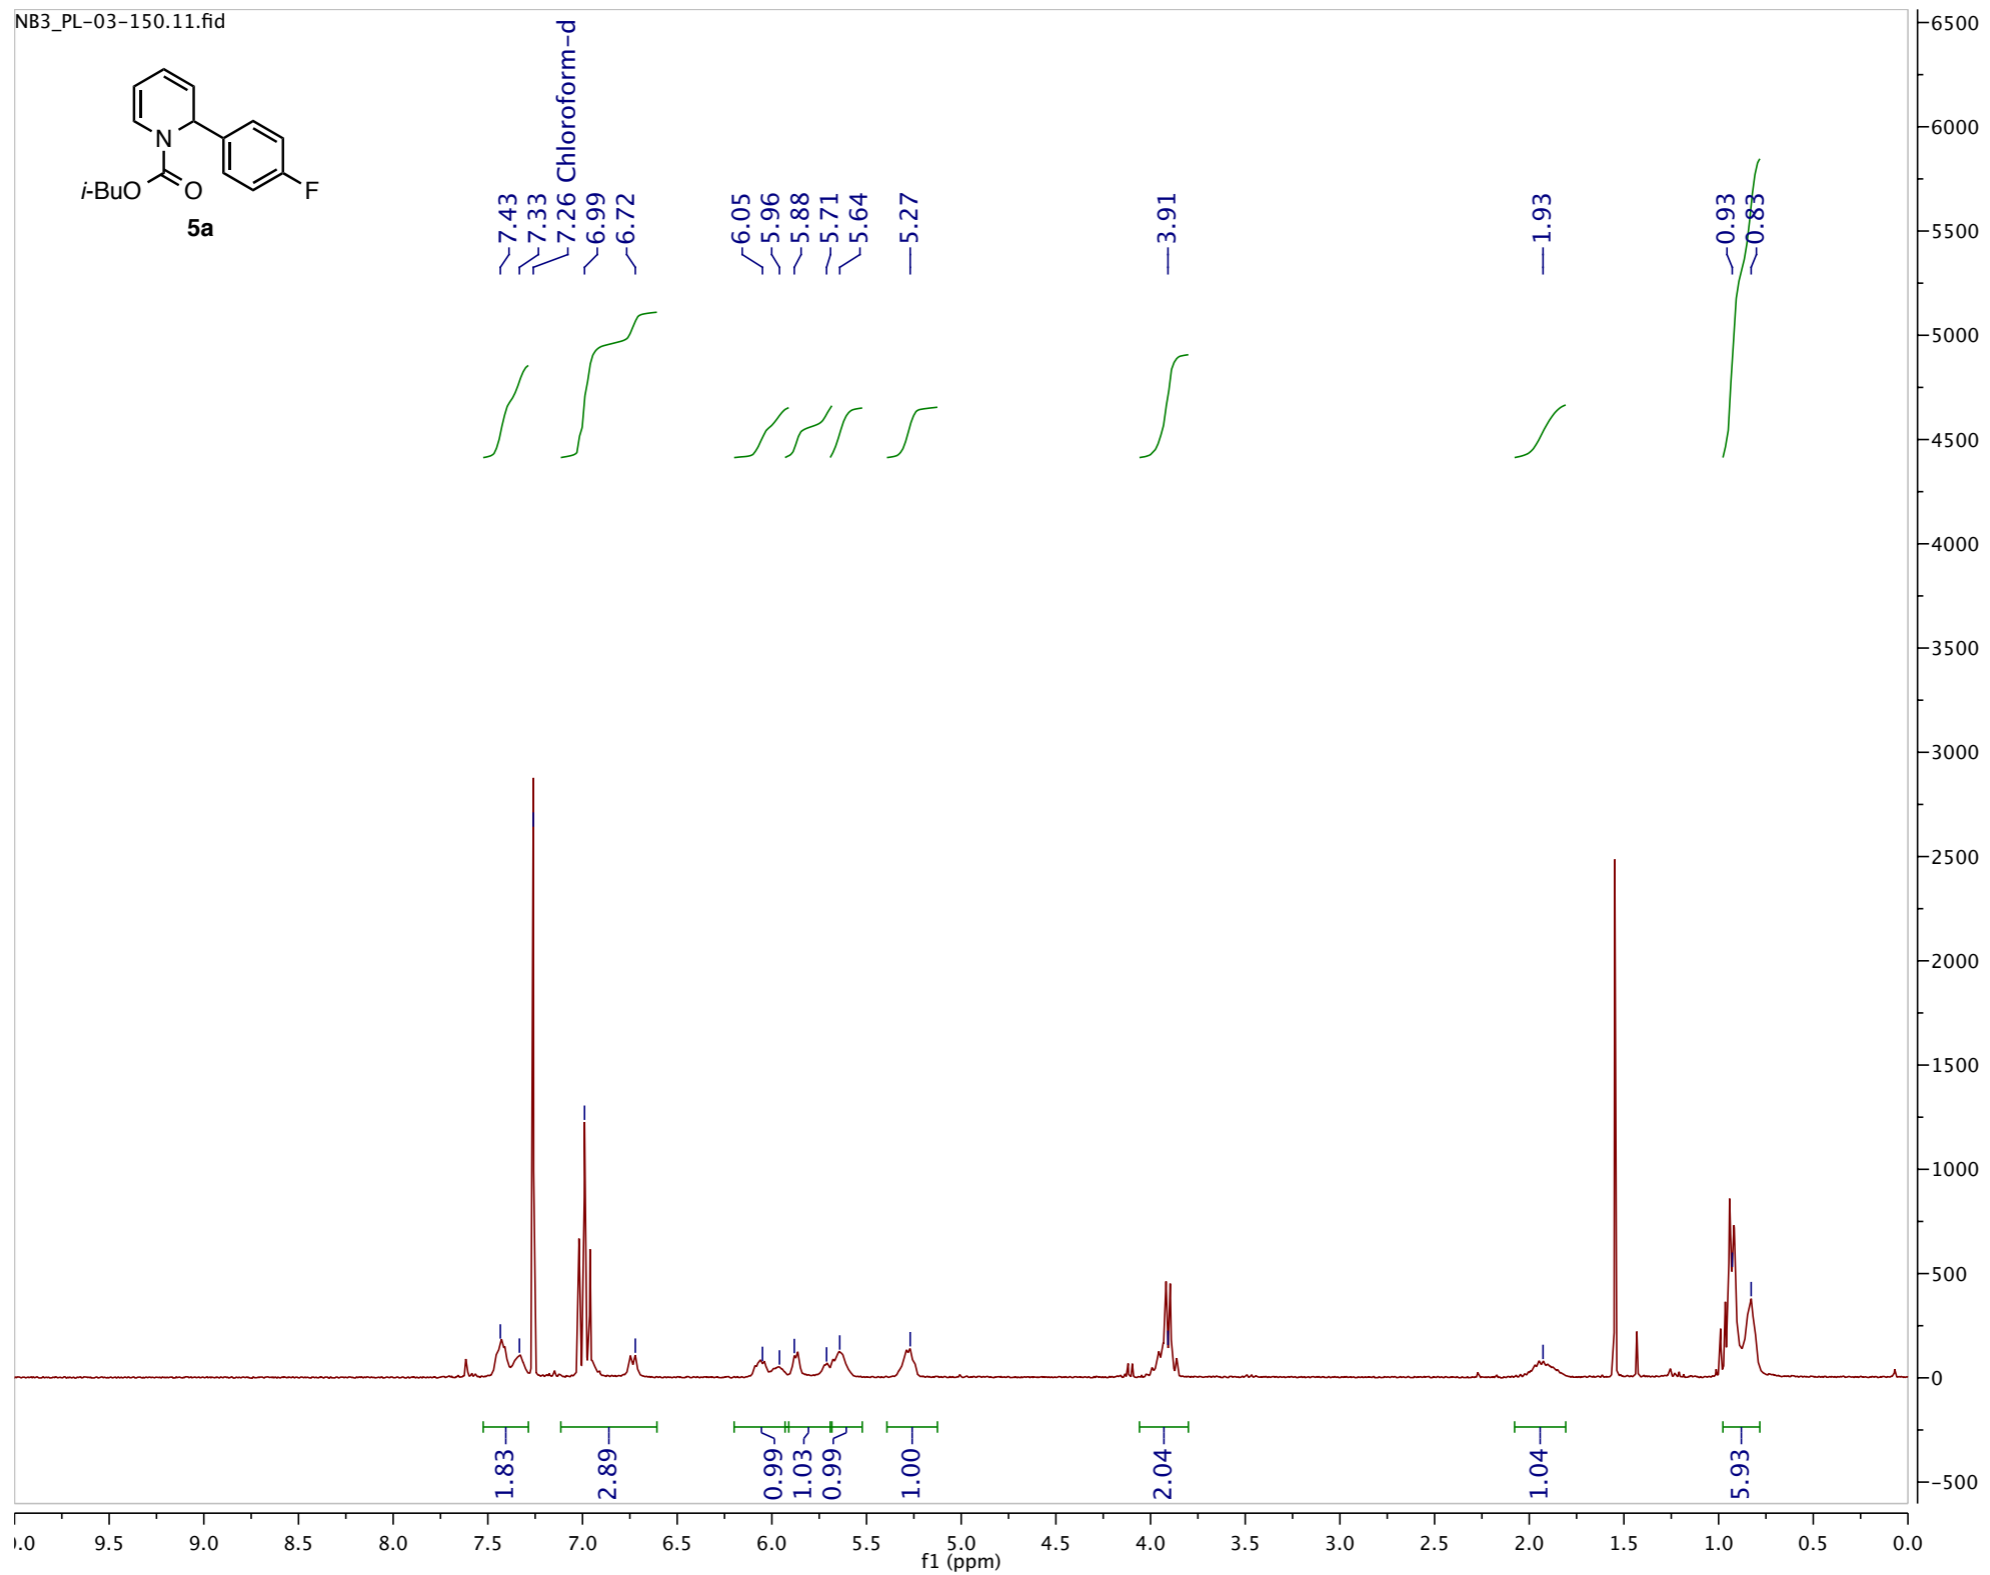

300 MHz  $^{19}\text{F}$ -NMR spectrum of **5a** in  $\text{CDCl}_3$

A2\_1-PL-05-240\_carbon.10.fid  
C13CPDp1.PU CDCl3 /opt/topspin3.0 jlutz 1

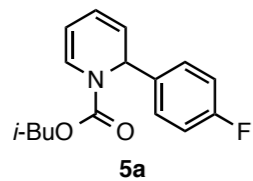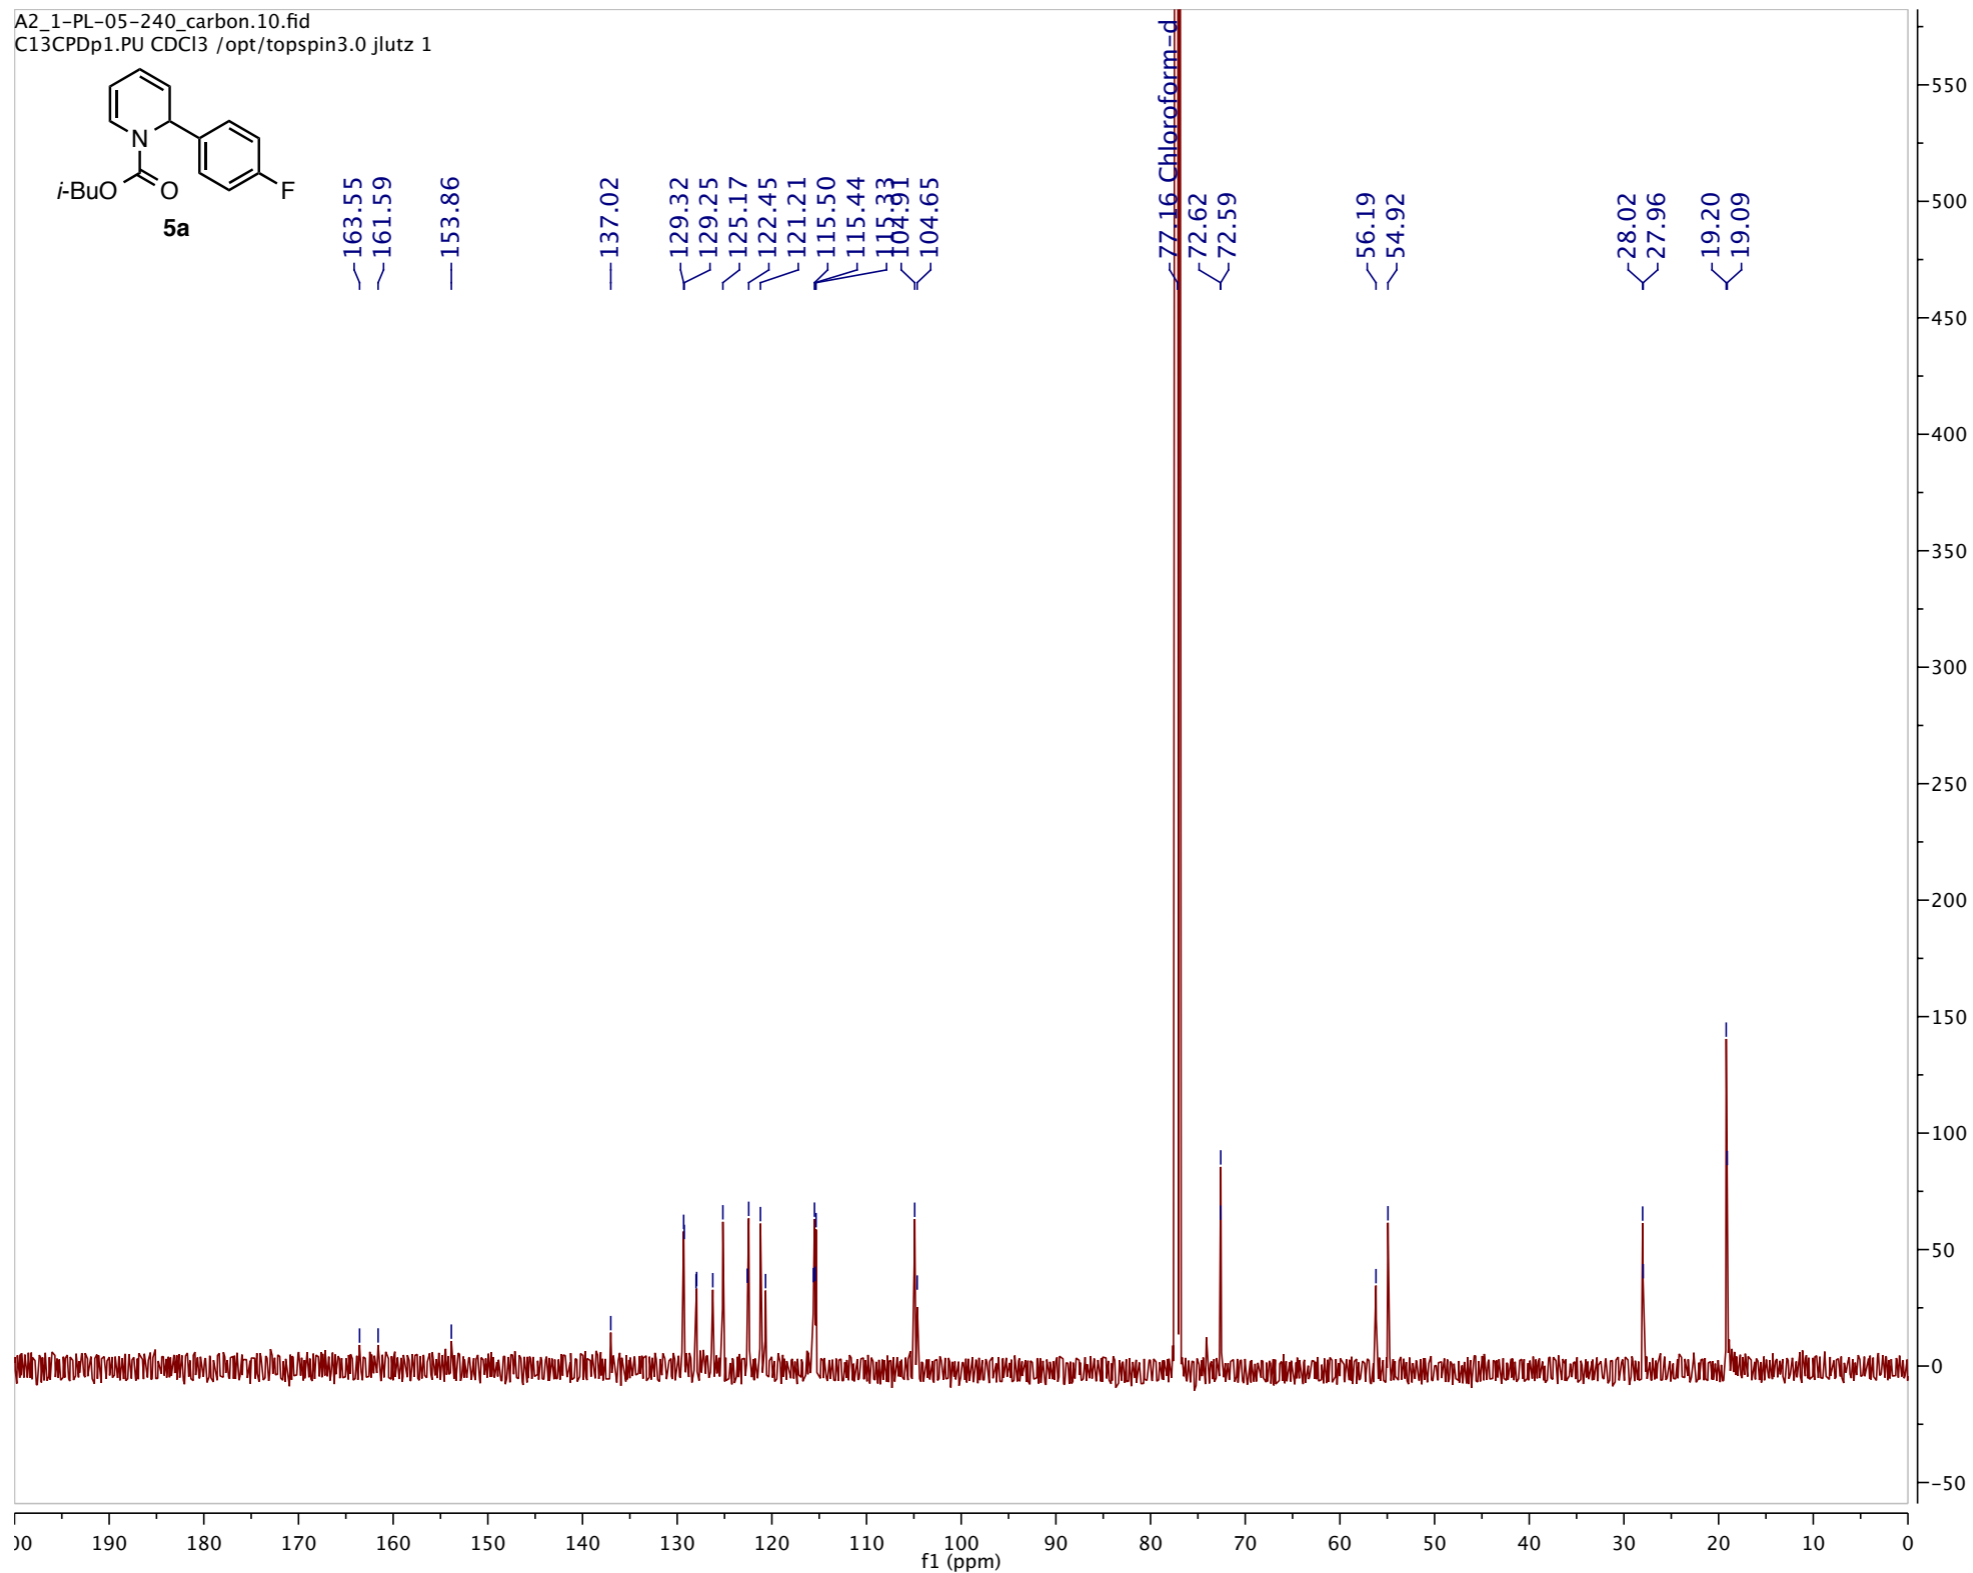

125 MHz <sup>13</sup>C-NMR spectrum of **5a** in CDCl<sub>3</sub>

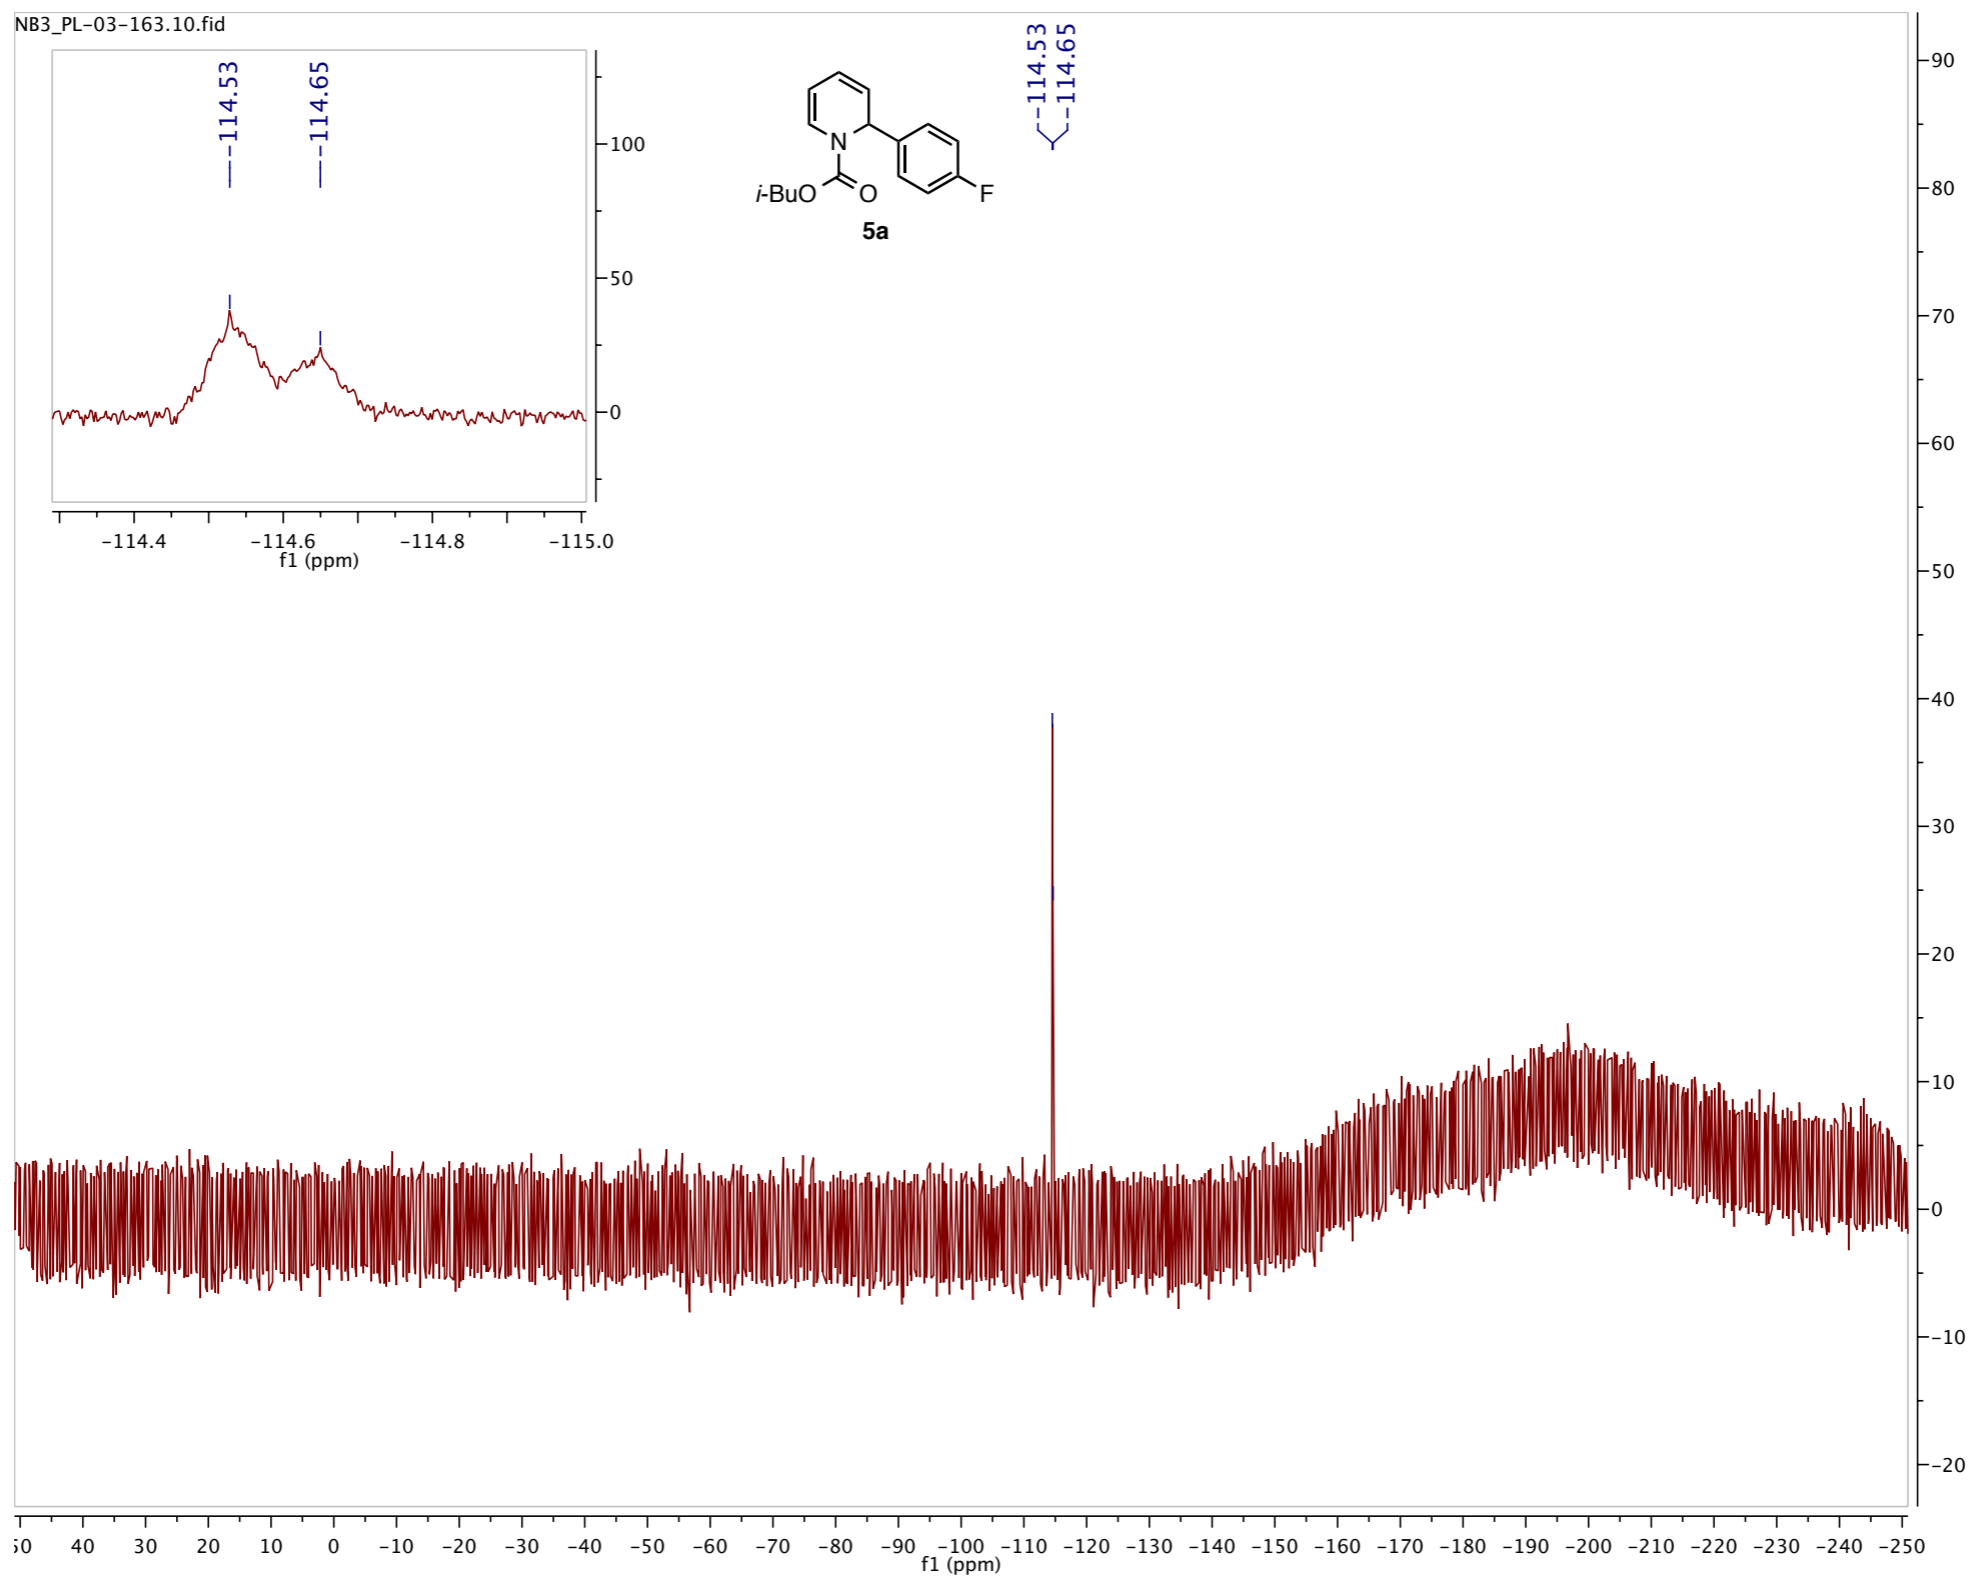

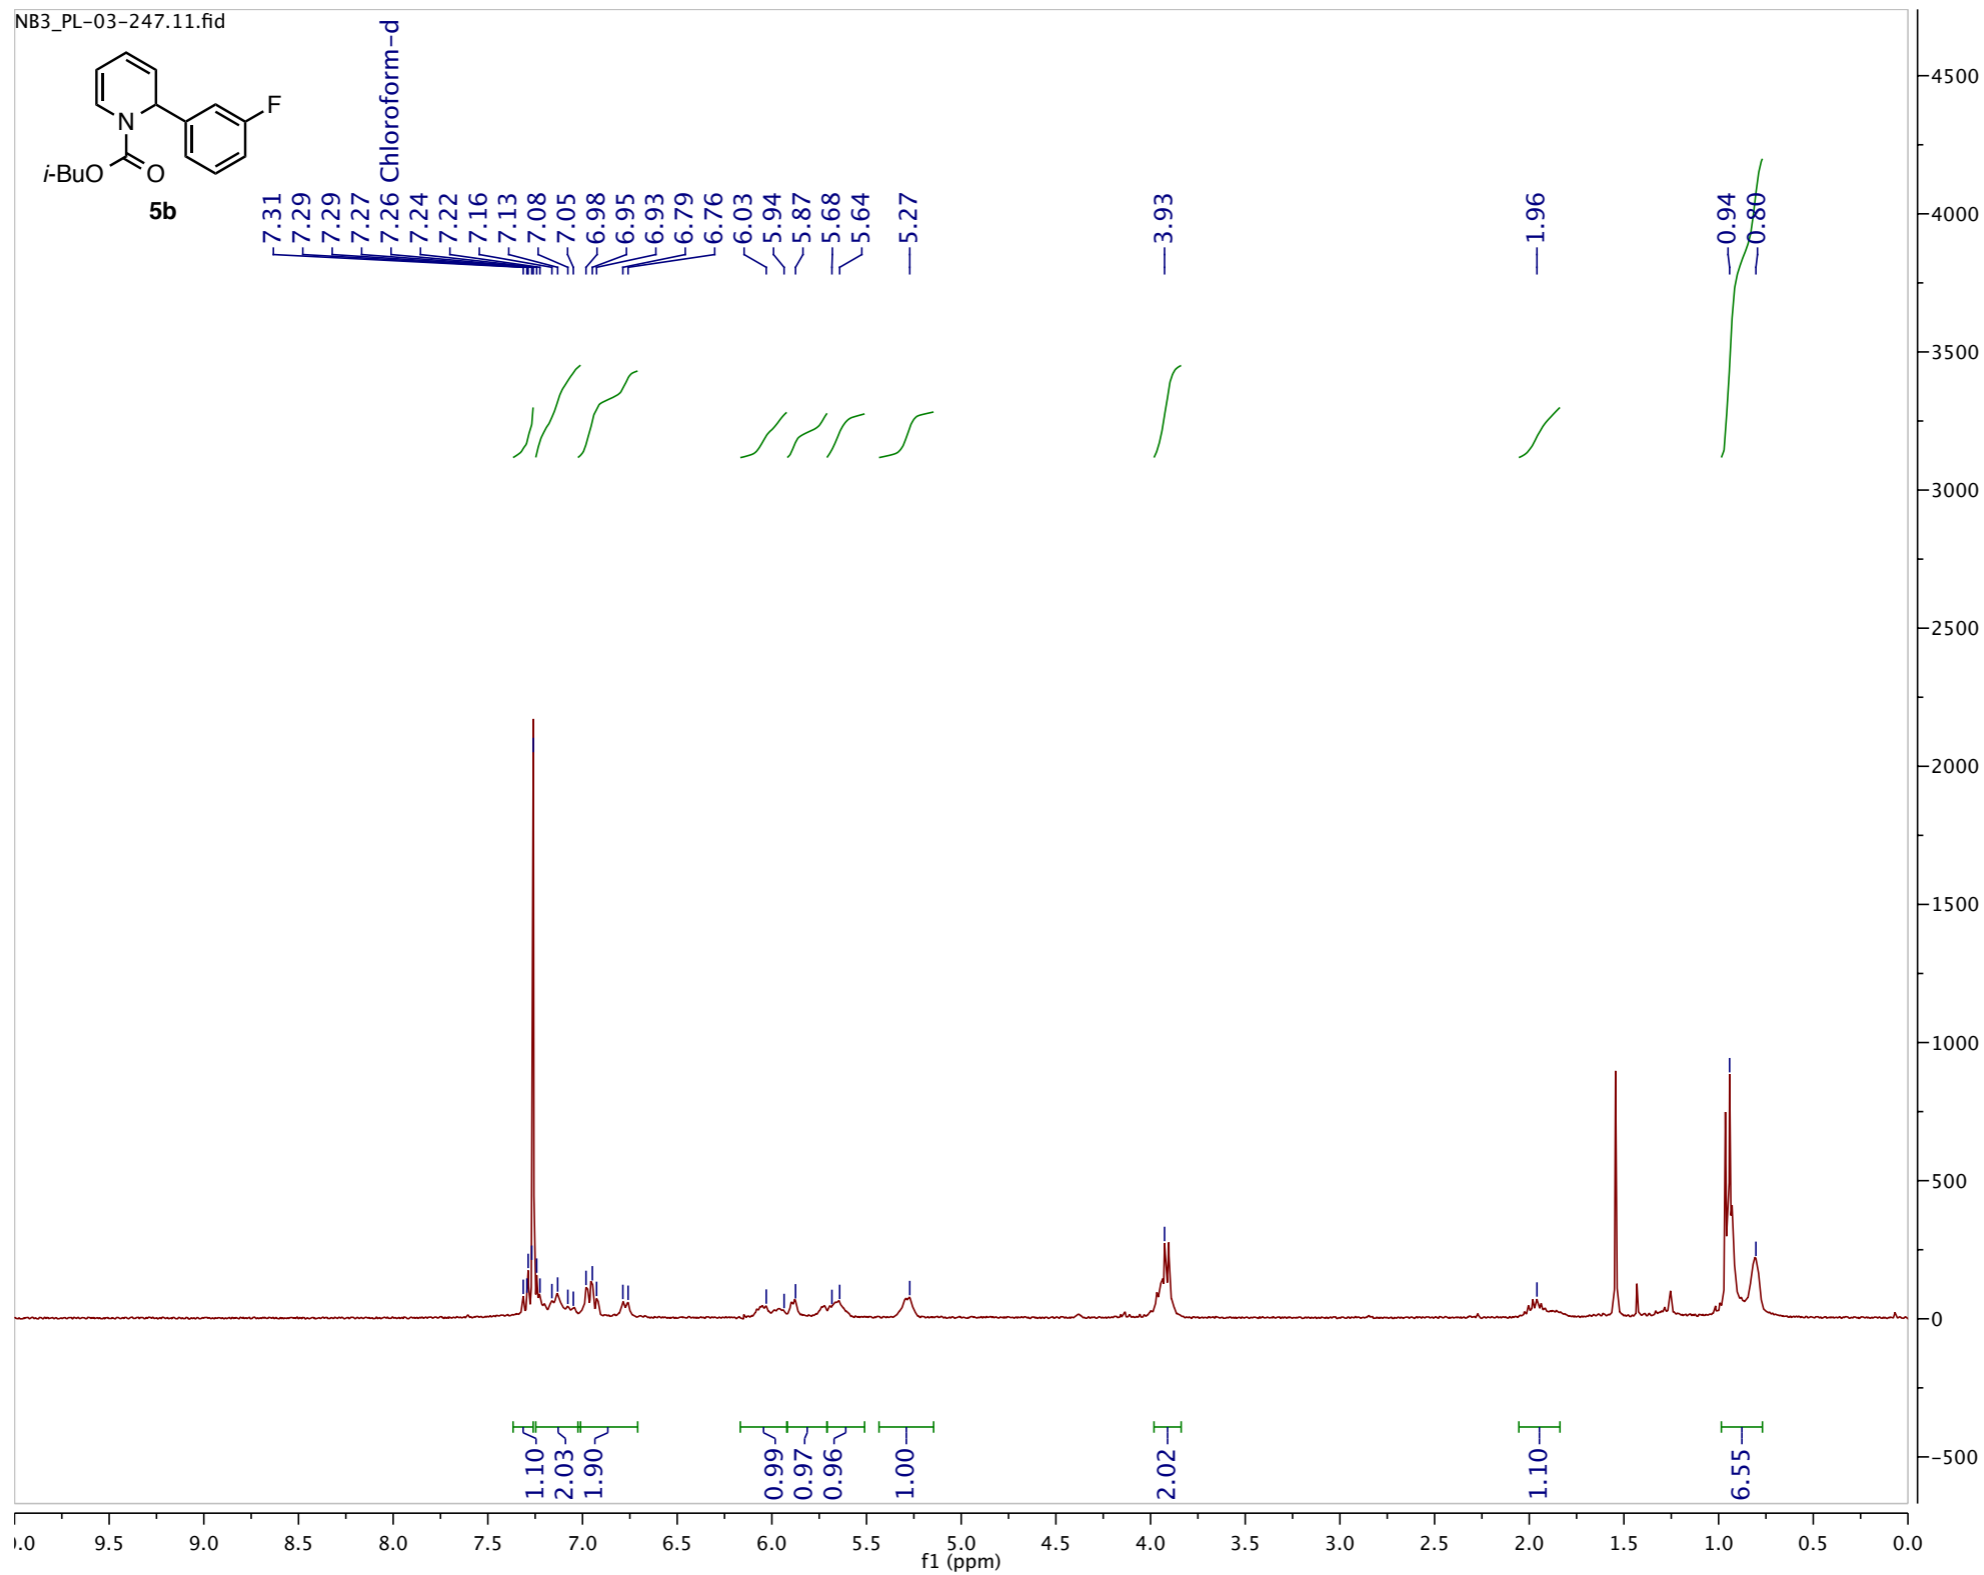

300 MHz  $^1\text{H}$ -NMR spectrum of **5b** in  $\text{CDCl}_3$

A2\_6-PL-05-247B\_carbon.10.fid  
C13CPDp1.PU CDCl3 /opt/topspin3.0 jlutz 6

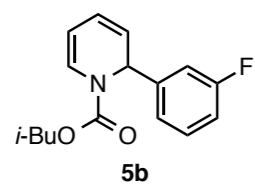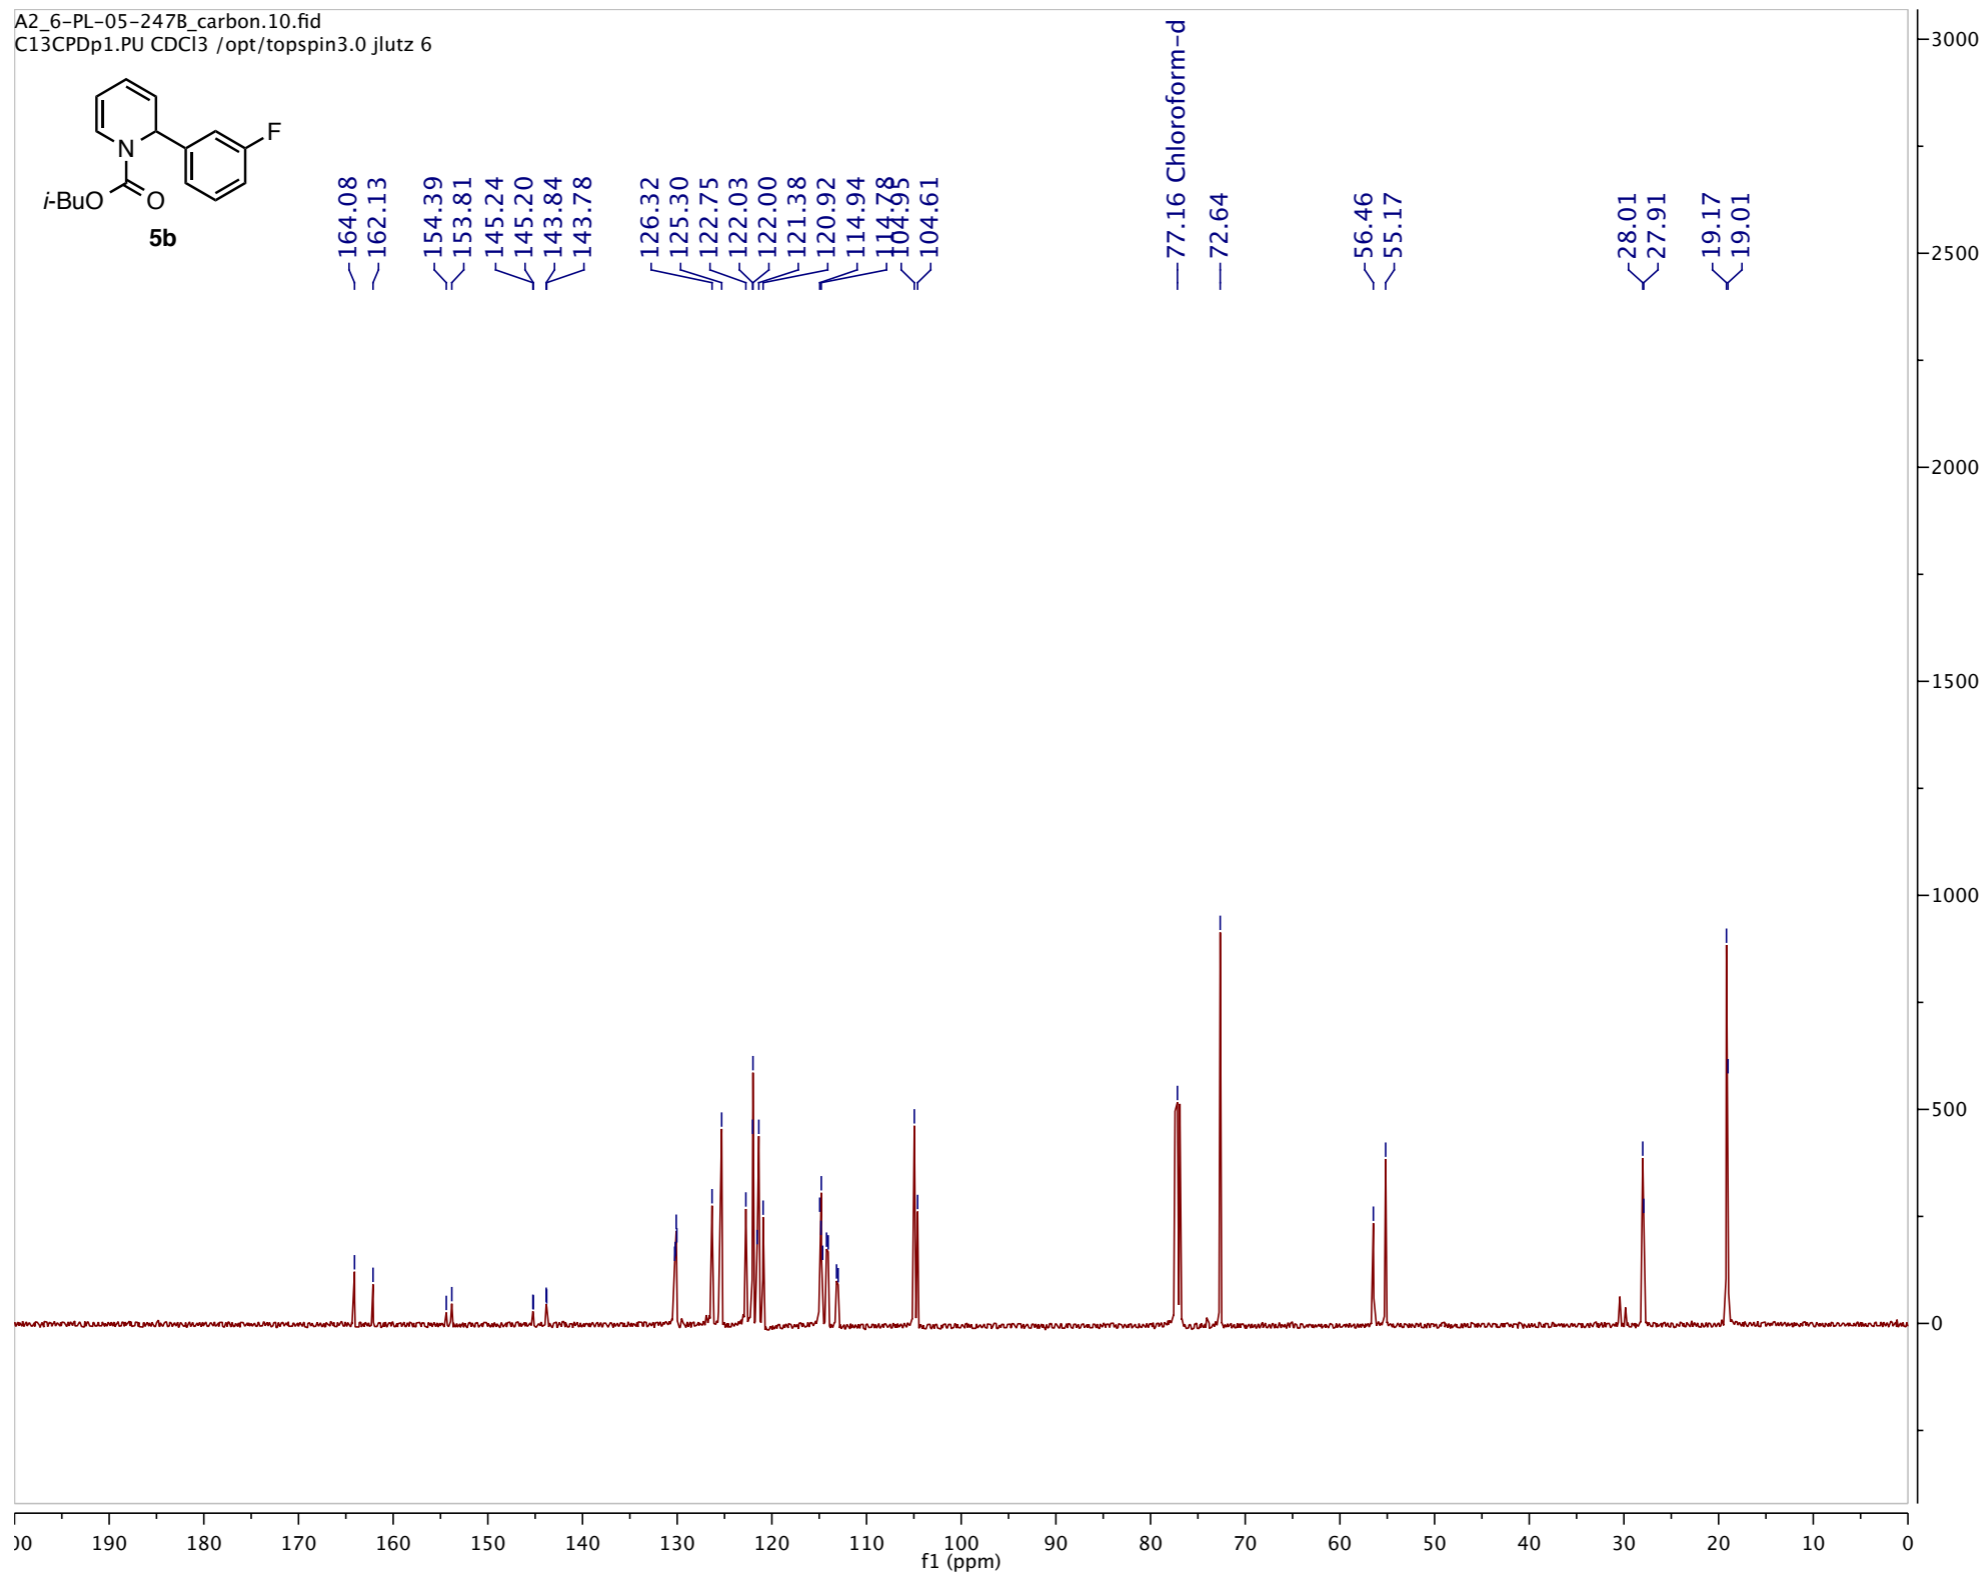



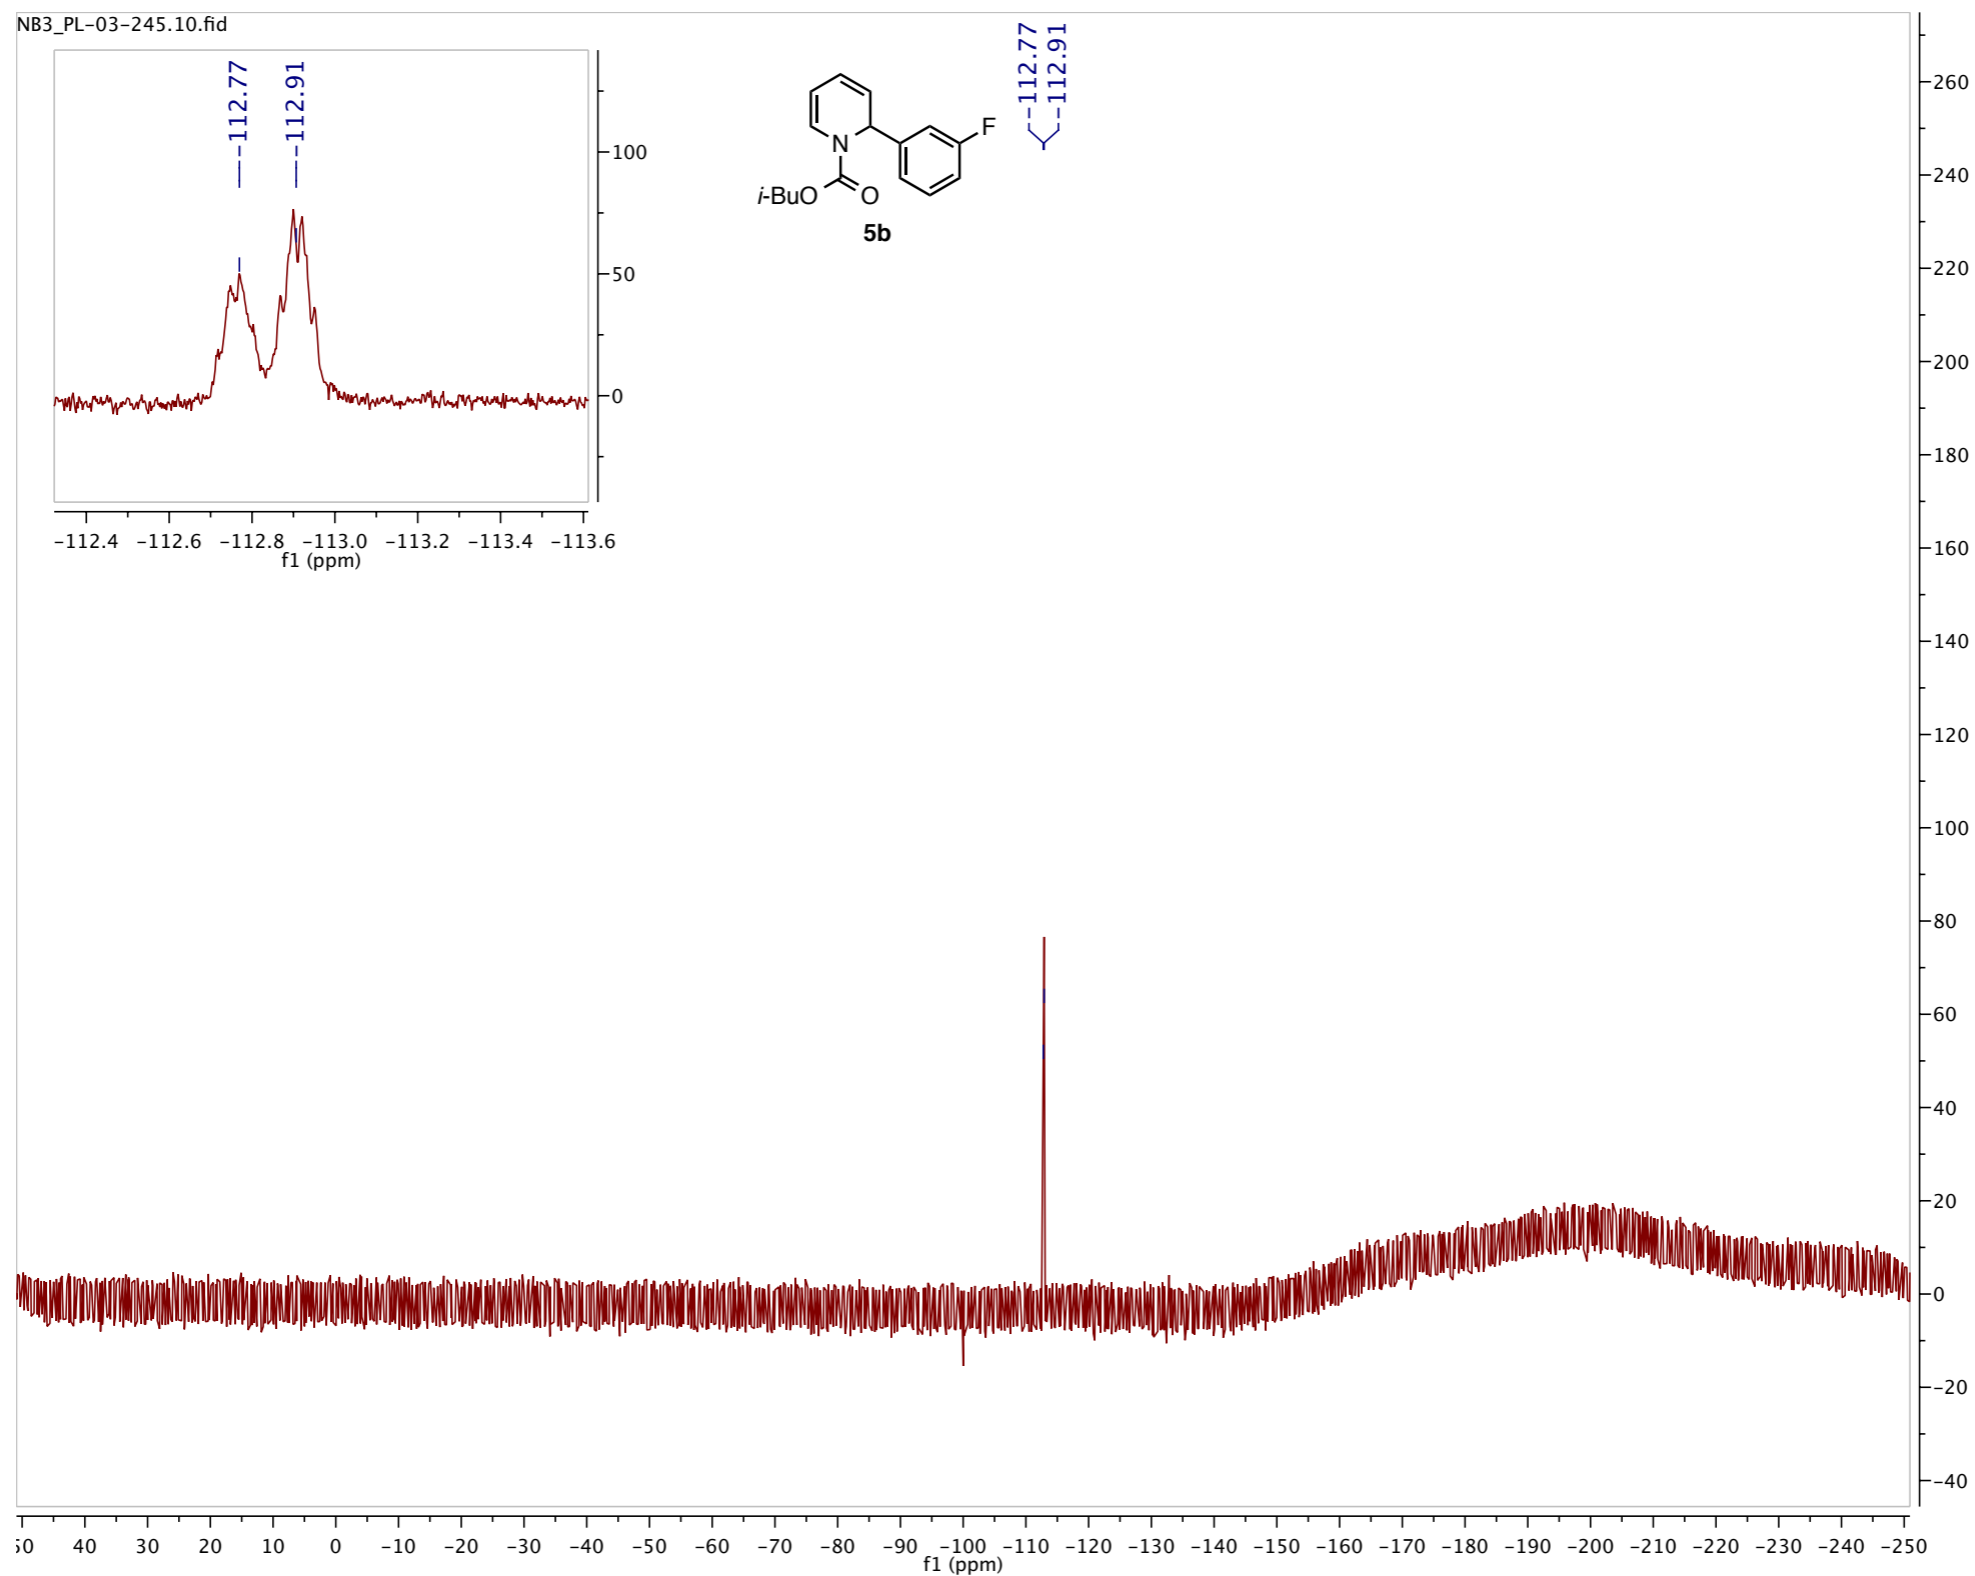

NB3\_PL-05-260\_proton.10.fid

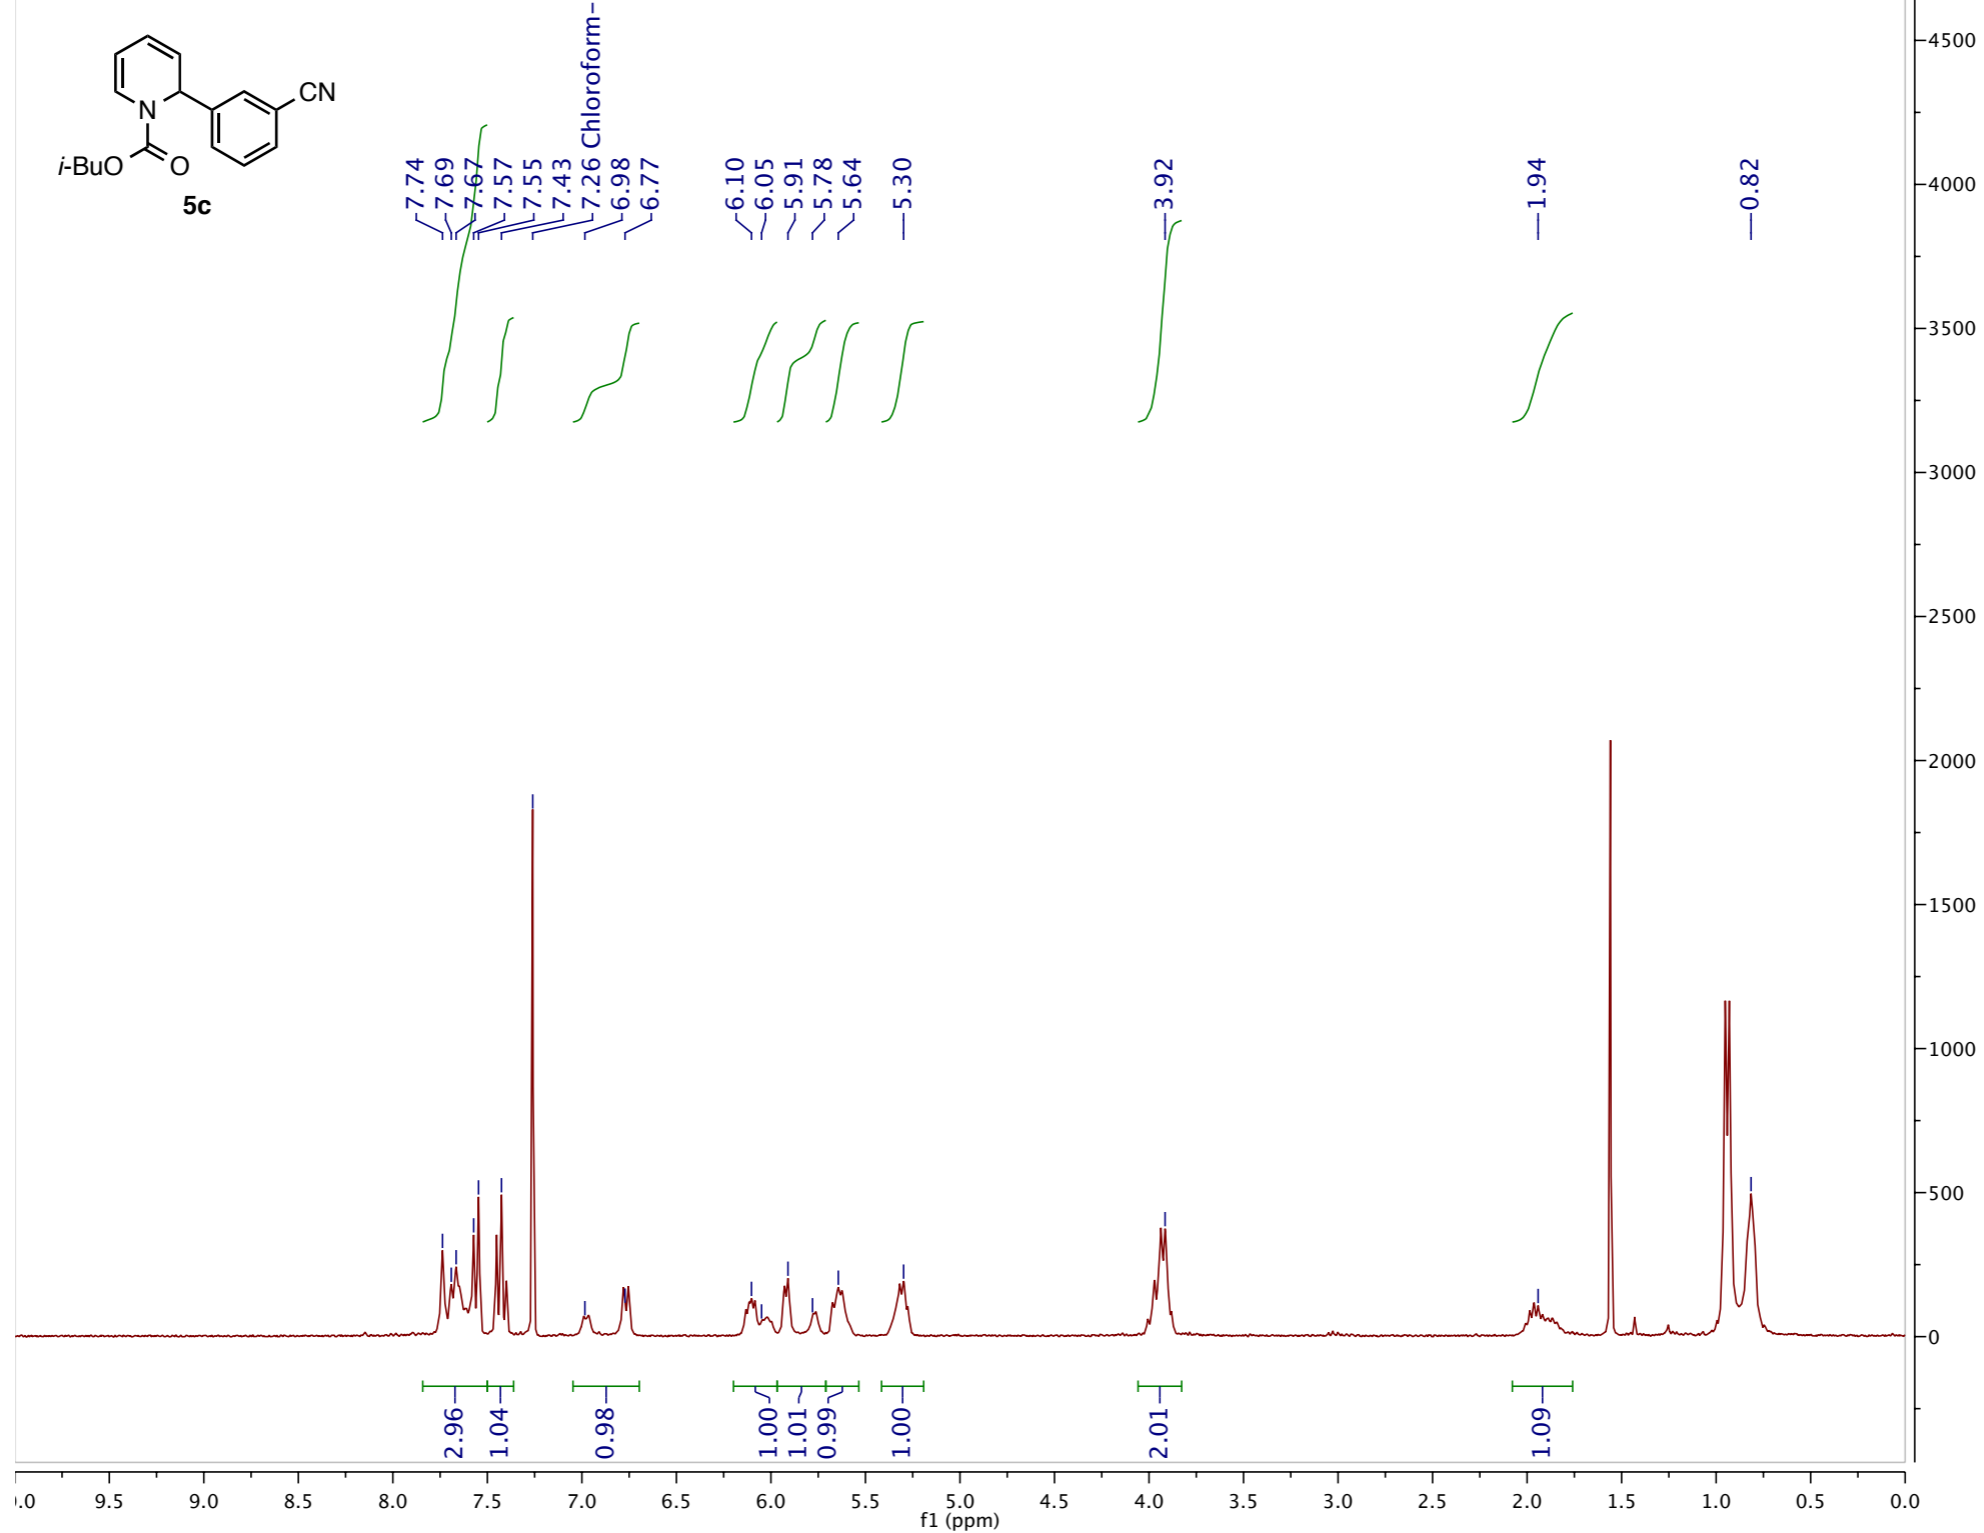

300 MHz  $^1\text{H}$ -NMR spectrum of **5c** in  $\text{CDCl}_3$

A2\_86-PL-05-260\_carbon.10.fid  
C13CPDp1.PU CDCl3 /opt/topspin3.0 jlutz 86

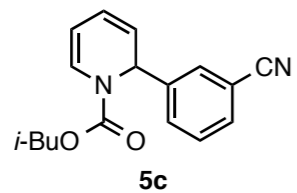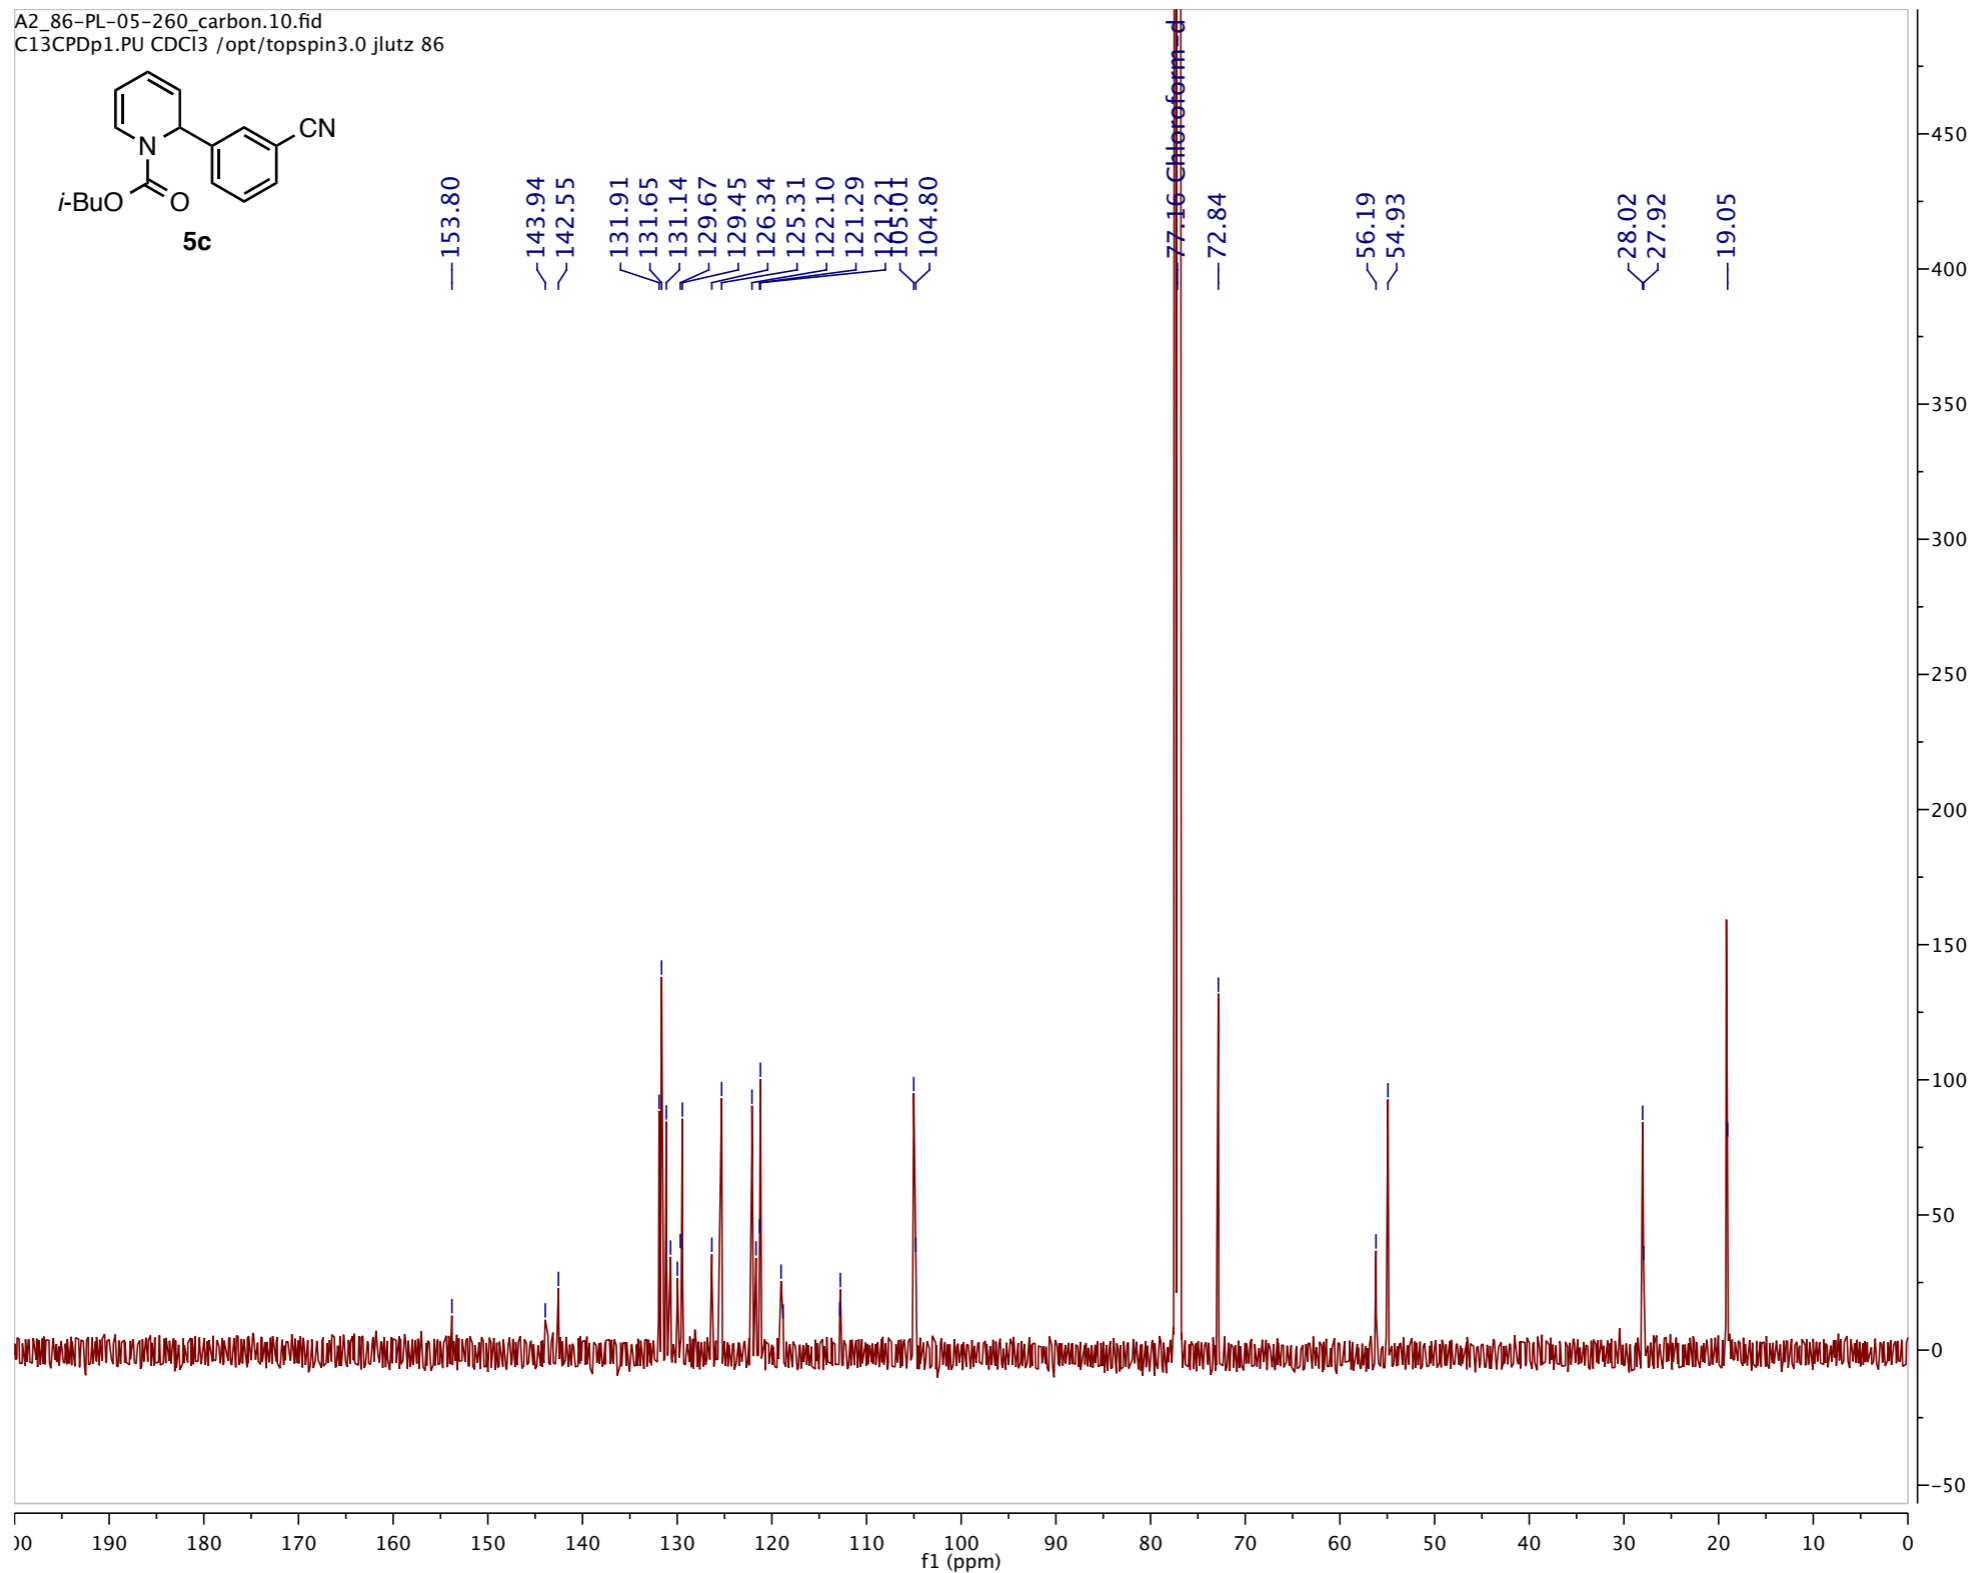

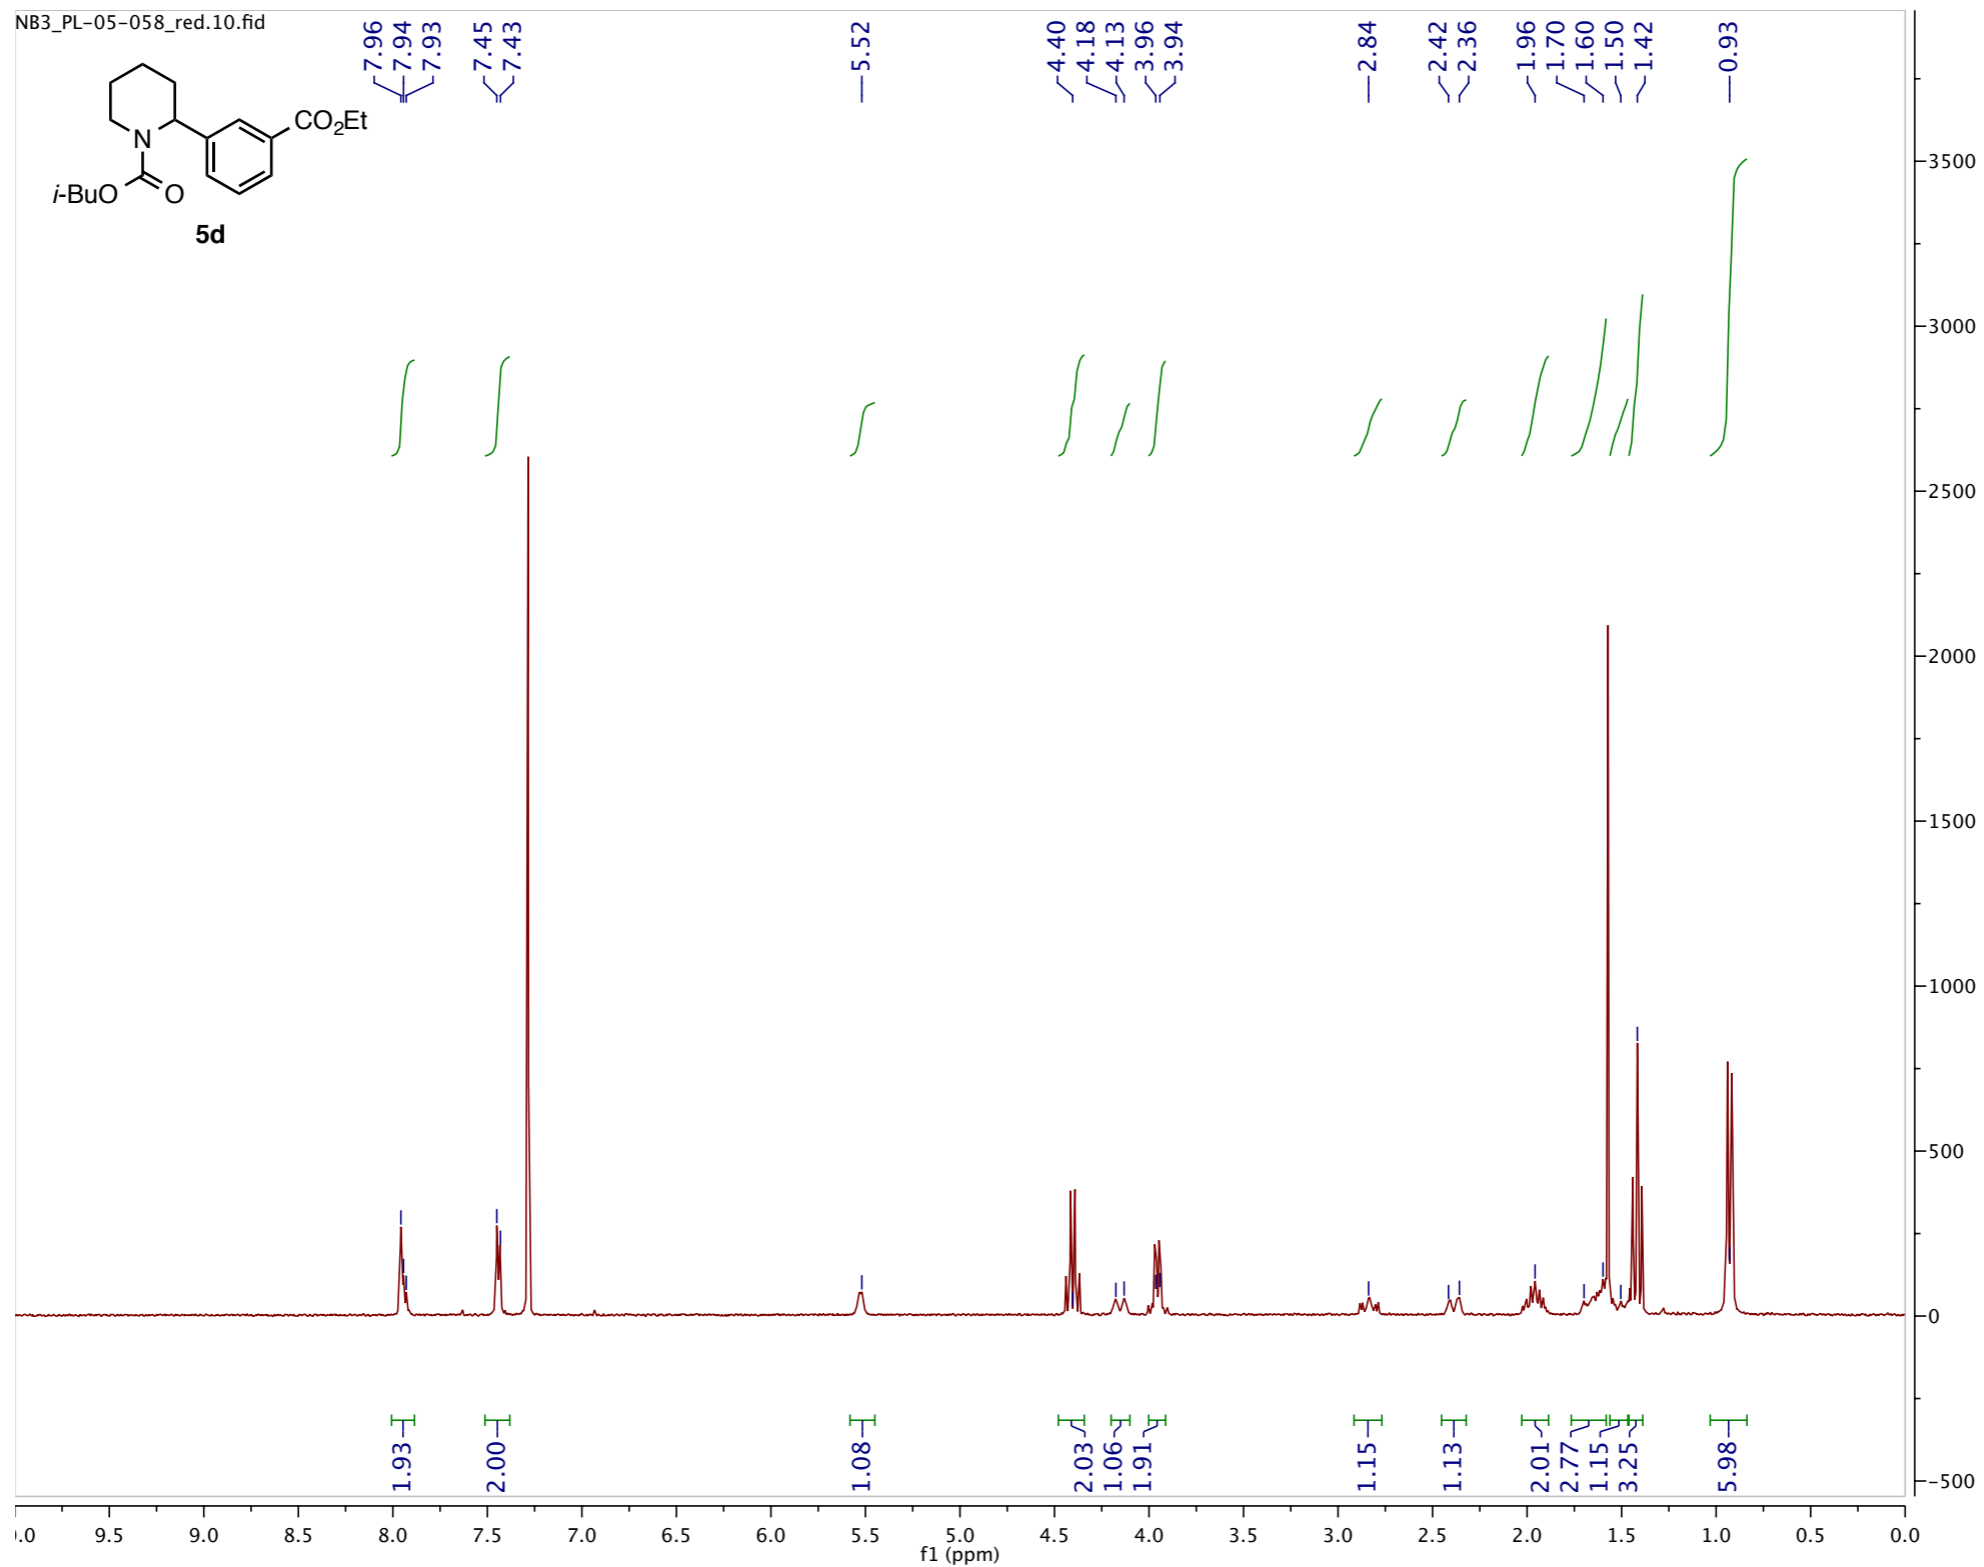

A2\_55-PL-05-058\_carbon.10.fid  
C13CPDp1.PU CDCl3 /opt/topspin3.0 jlutz 55

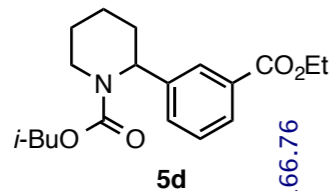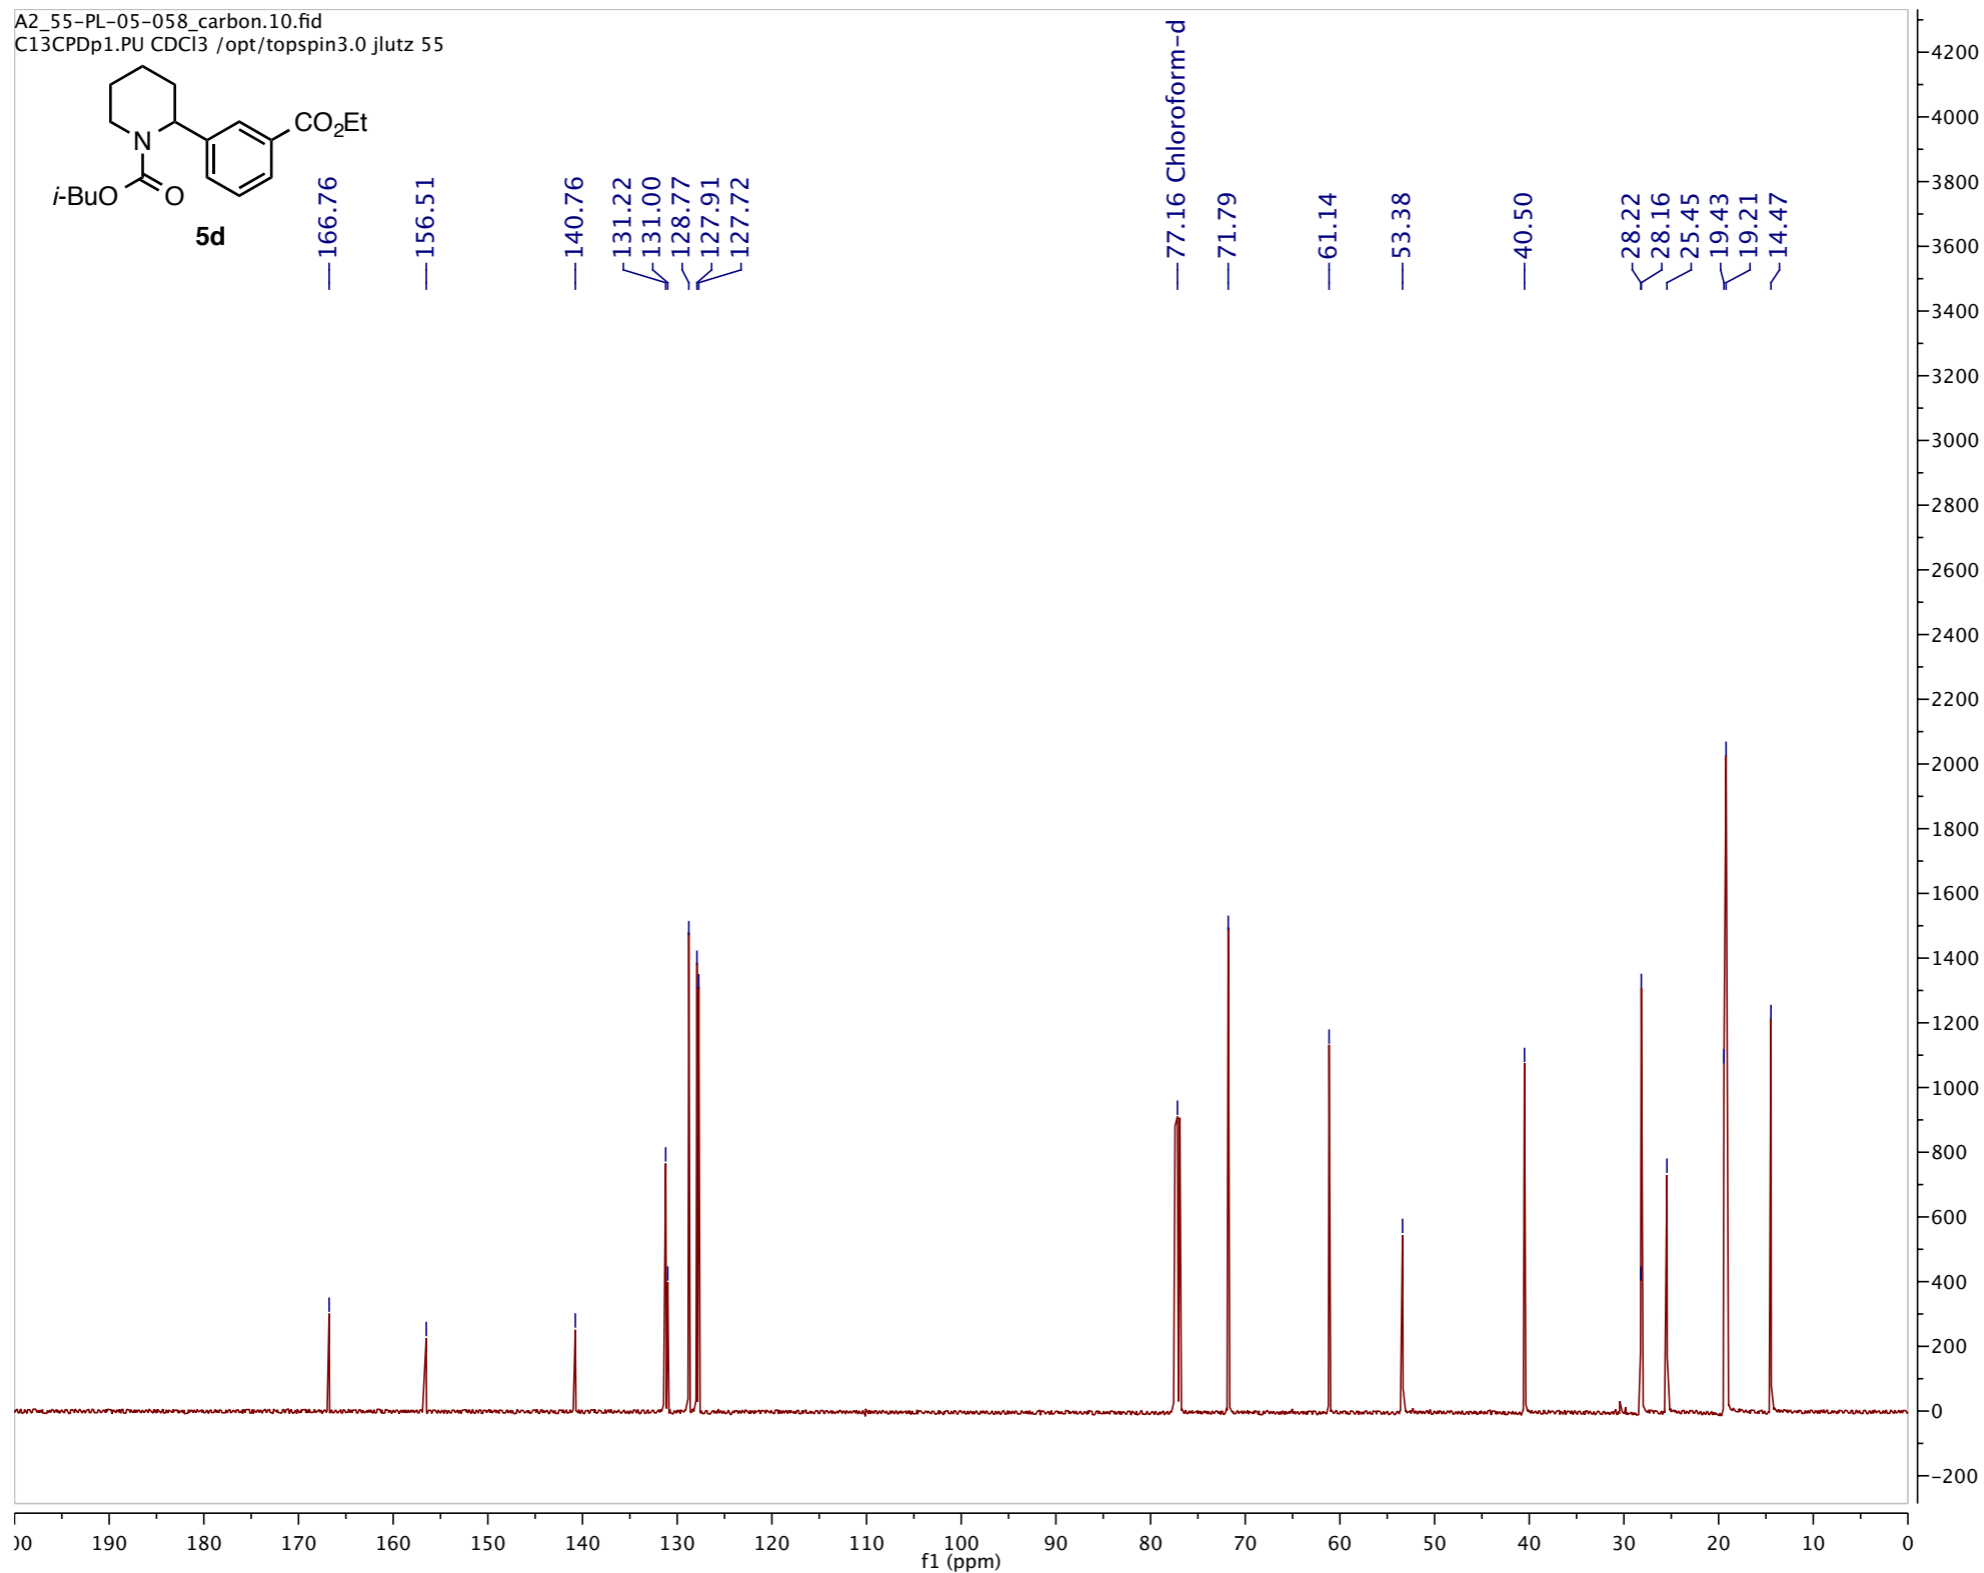

NB3\_PL-03-174.11.fid

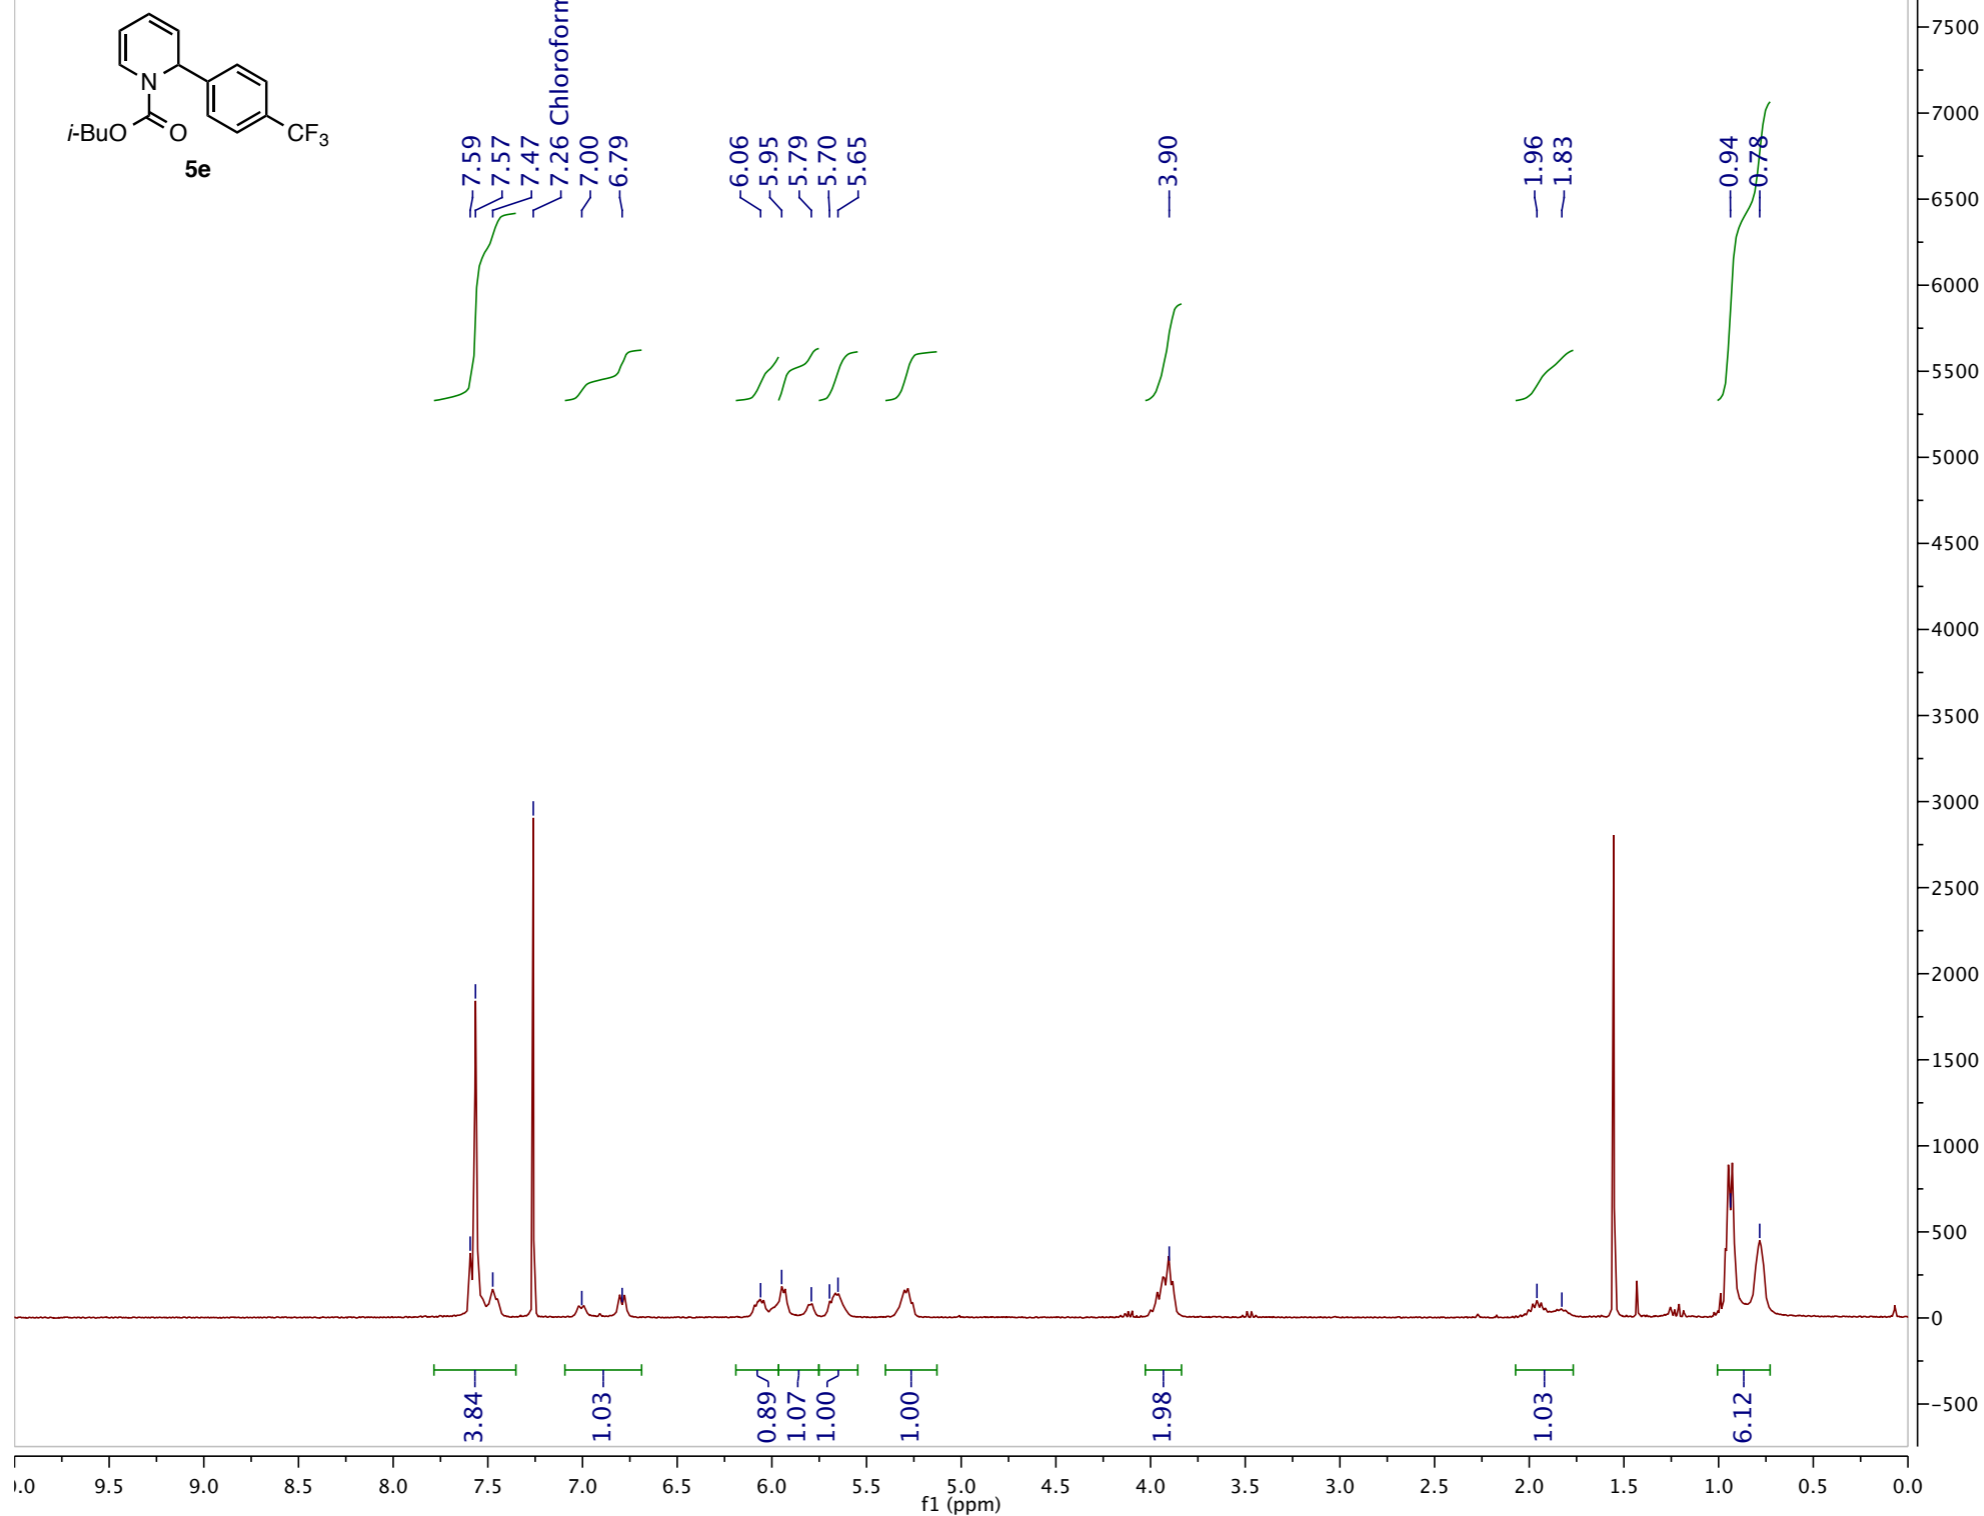

300 MHz <sup>1</sup>H-NMR spectrum of **5e** in CDCl<sub>3</sub>

A2\_32-PL-05-247E\_carbon.10.fid  
C13CPDp1.PU CDCl3 /opt/topspin3.0 jlutz 32

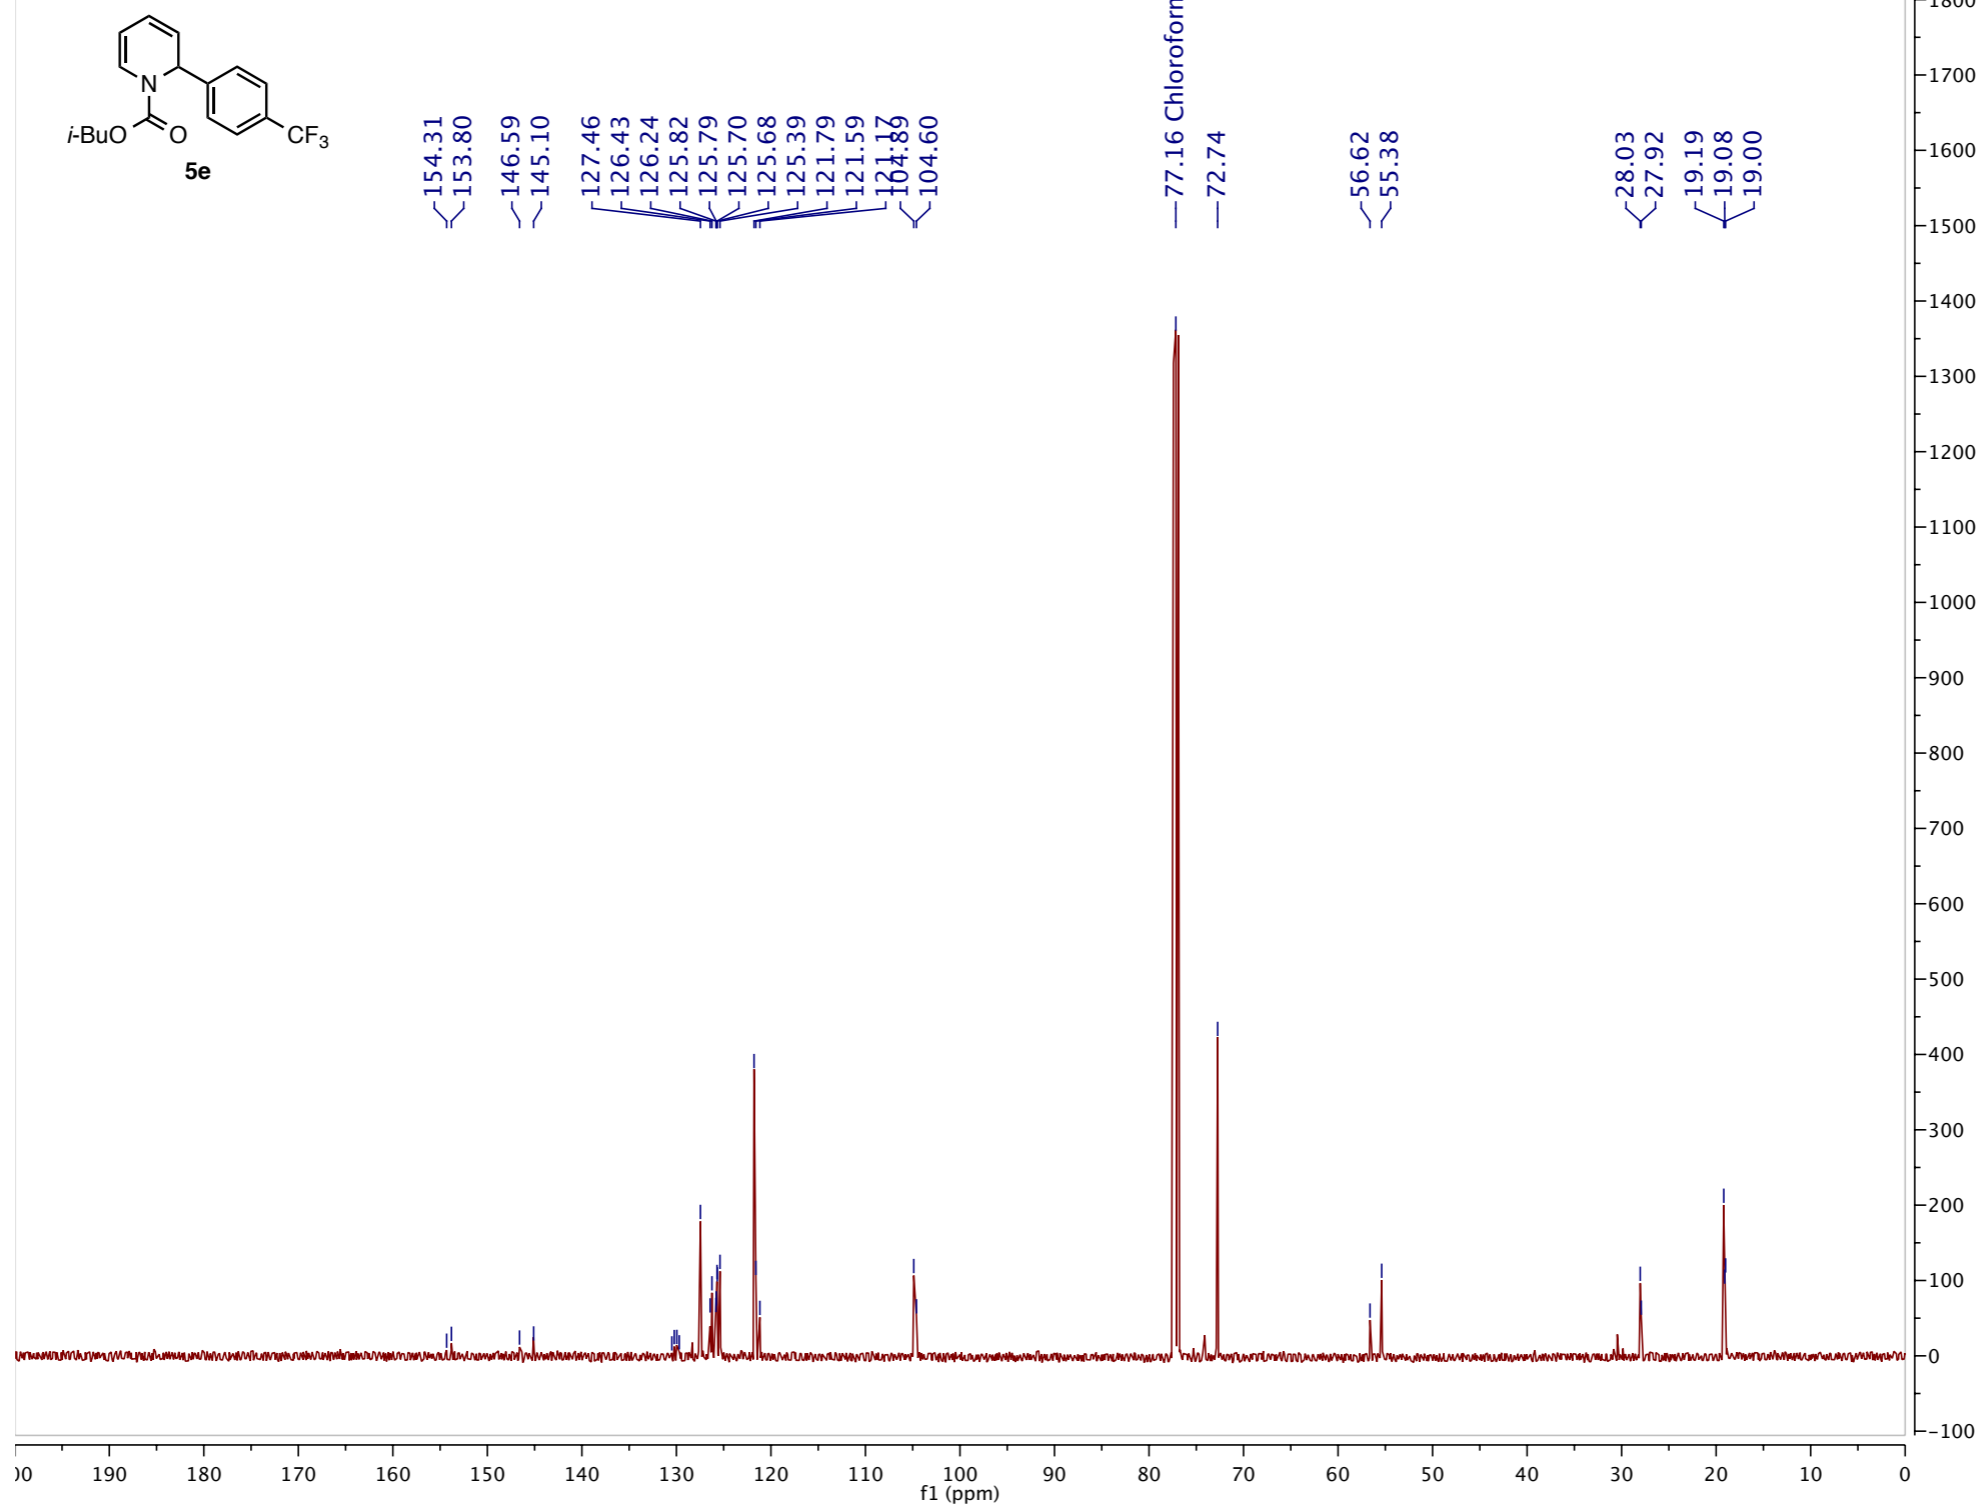

125 MHz  $^{13}\text{C}$ -NMR spectrum of **5e** in  $\text{CDCl}_3$

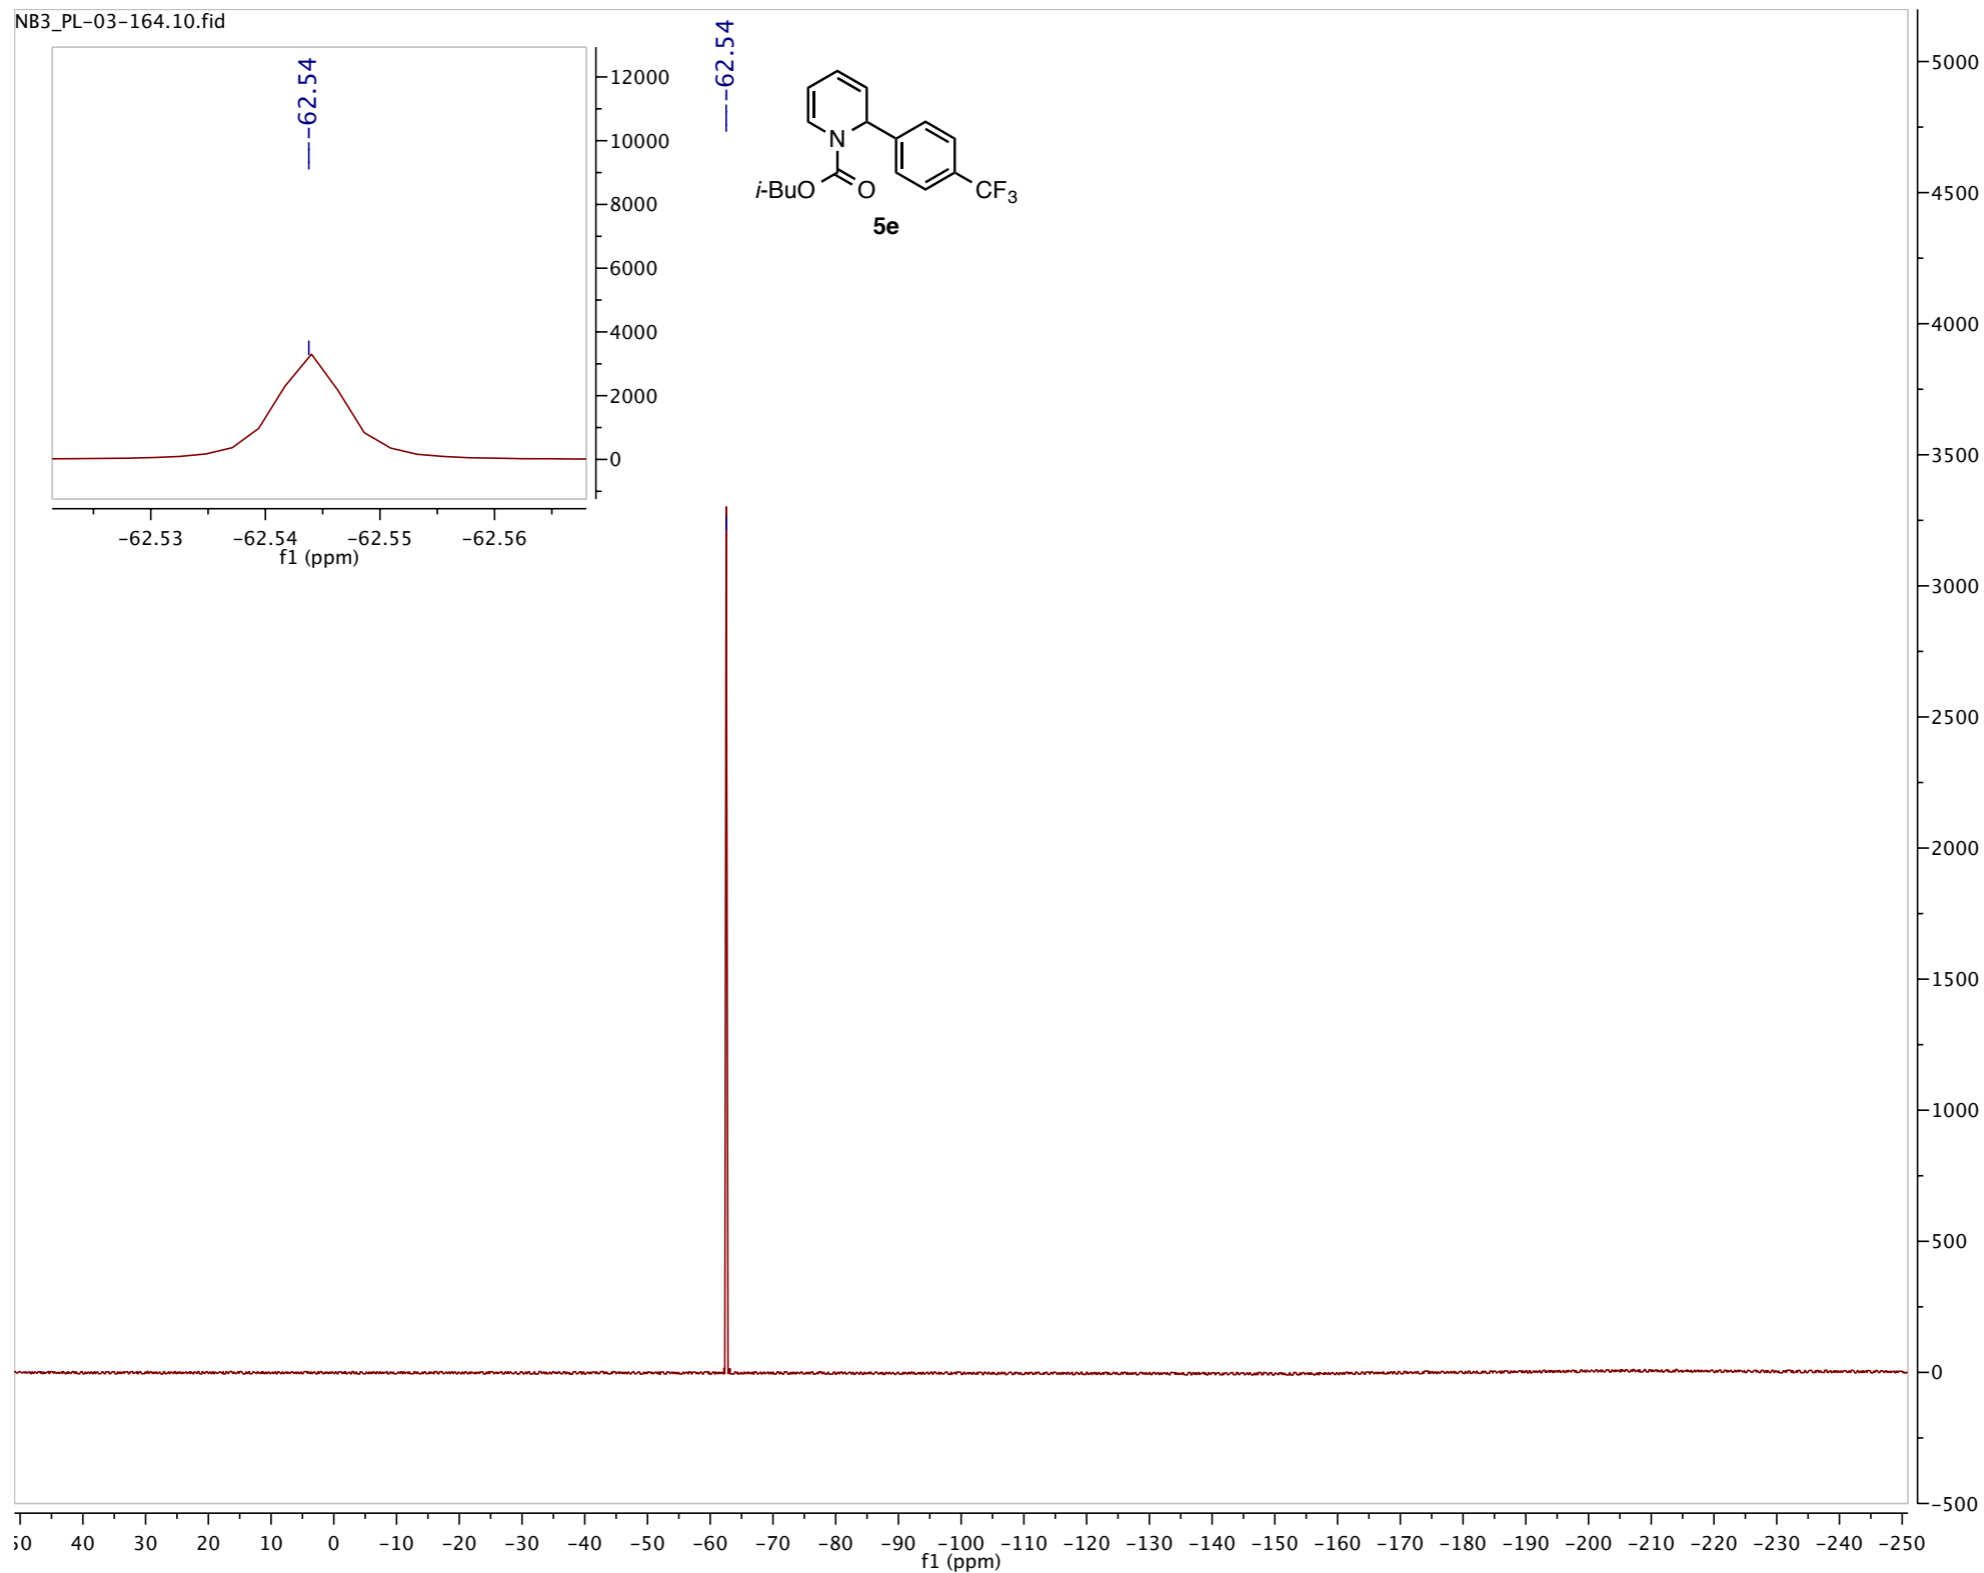



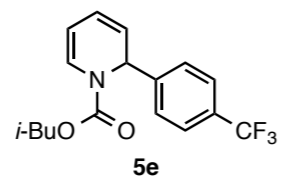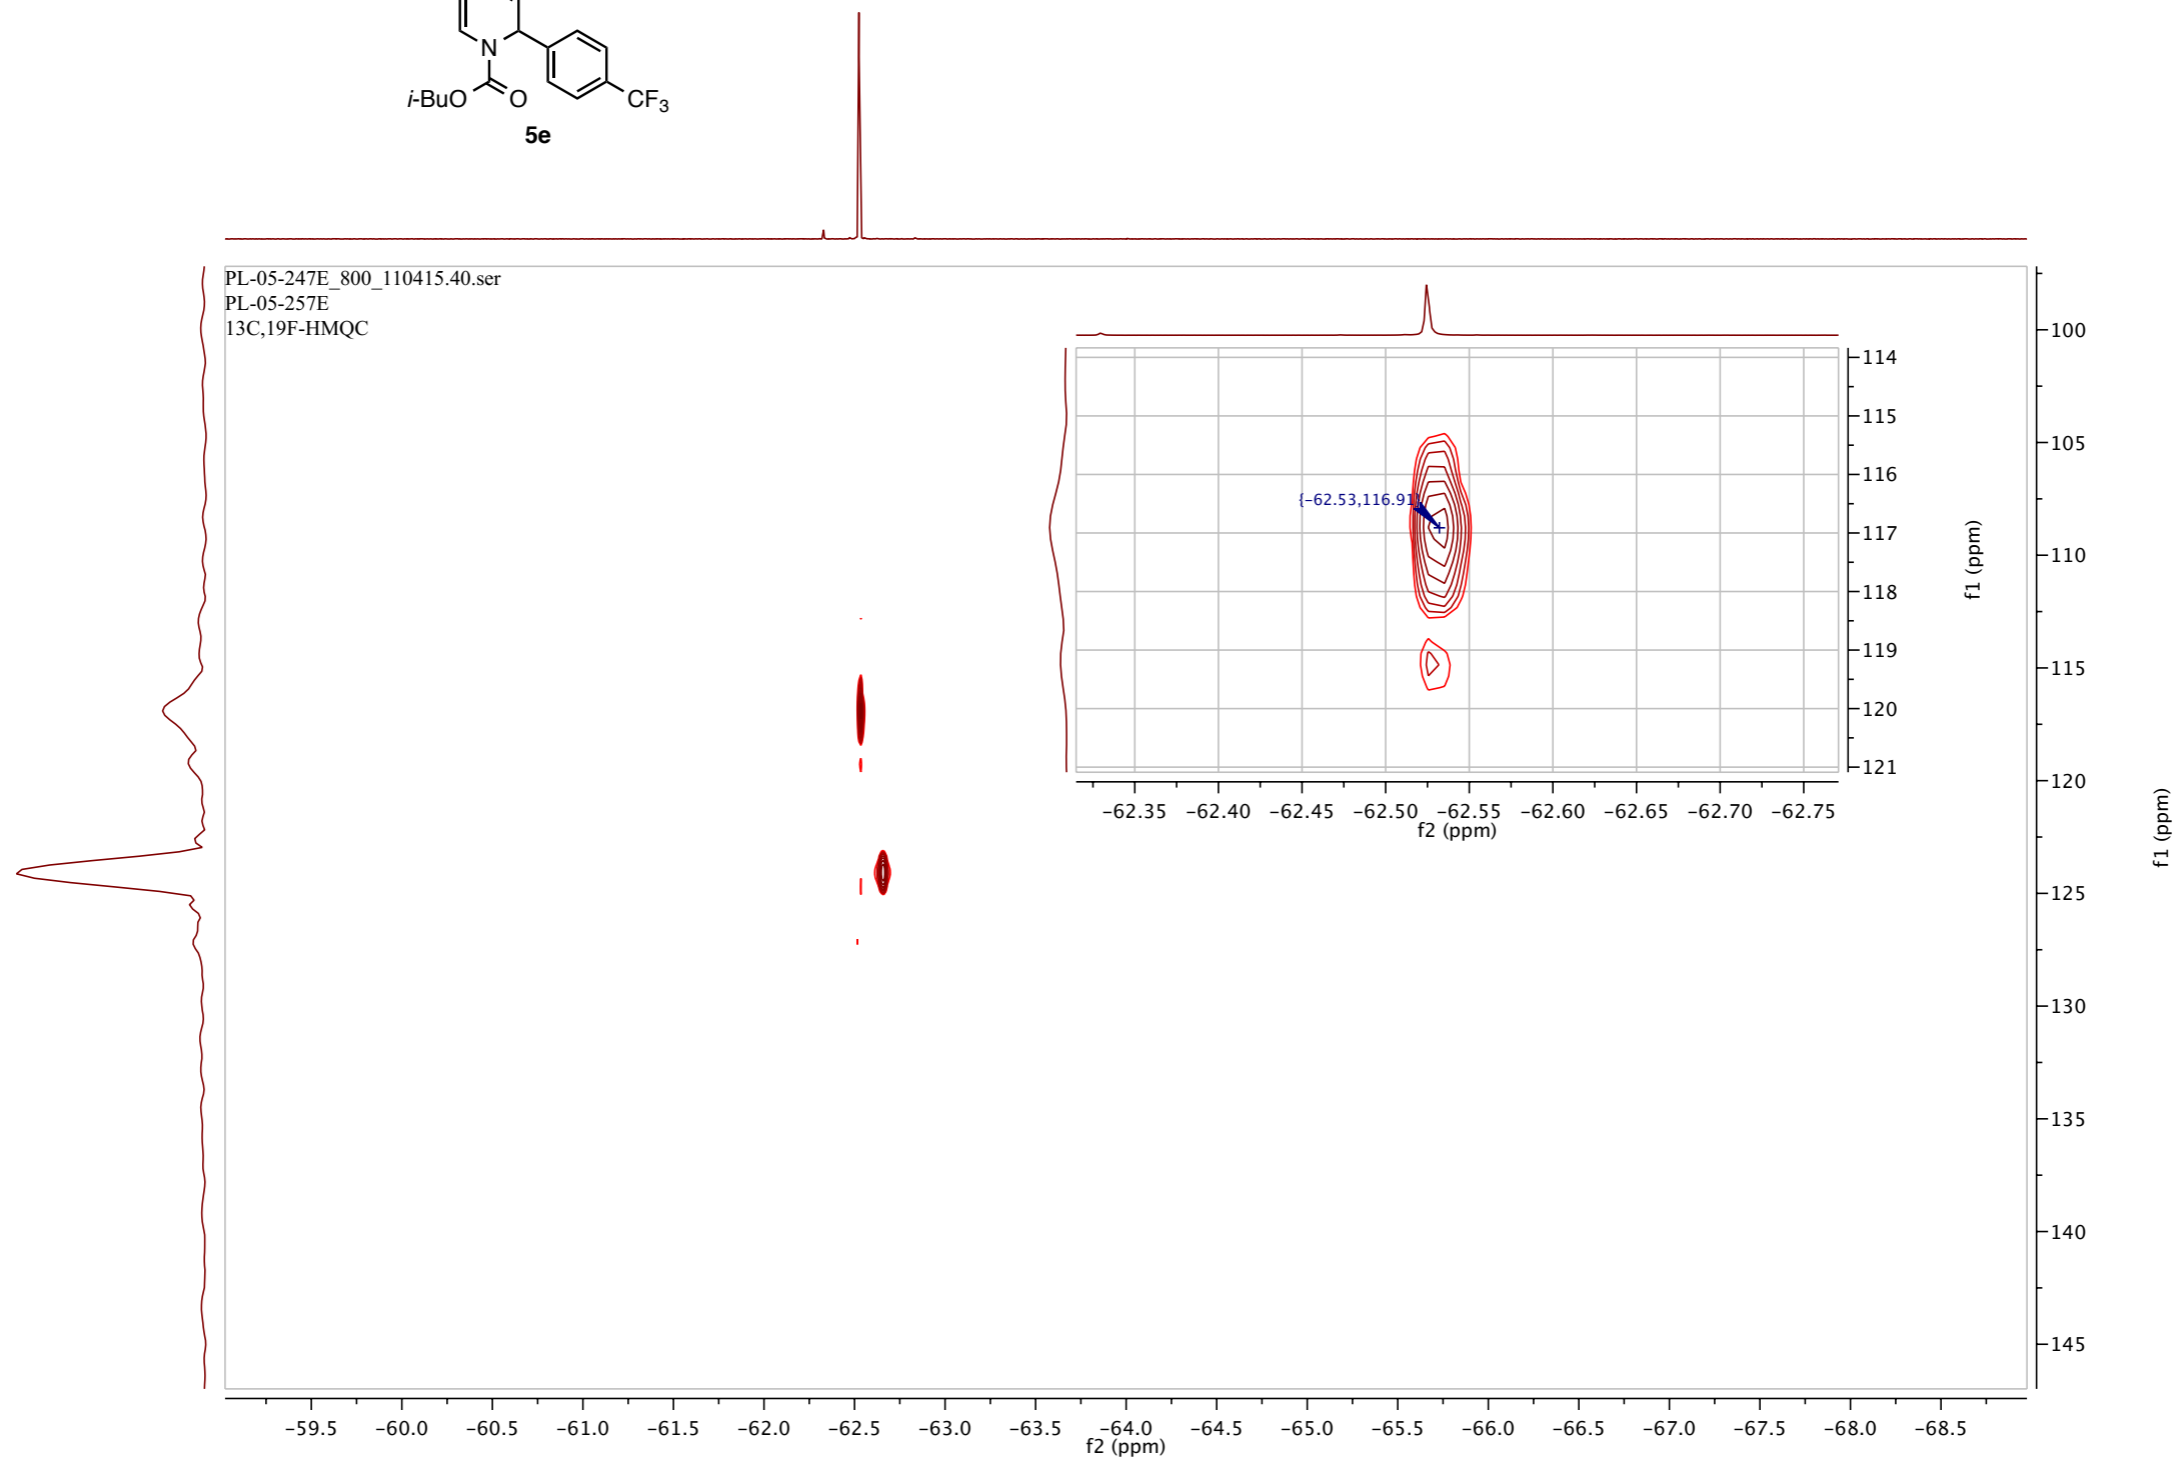

$^{13}\text{C}, ^{19}\text{F}$ -HMQC spectrum of **5e** in  $\text{CDCl}_3$

NB3\_PL-04-226.11.fid

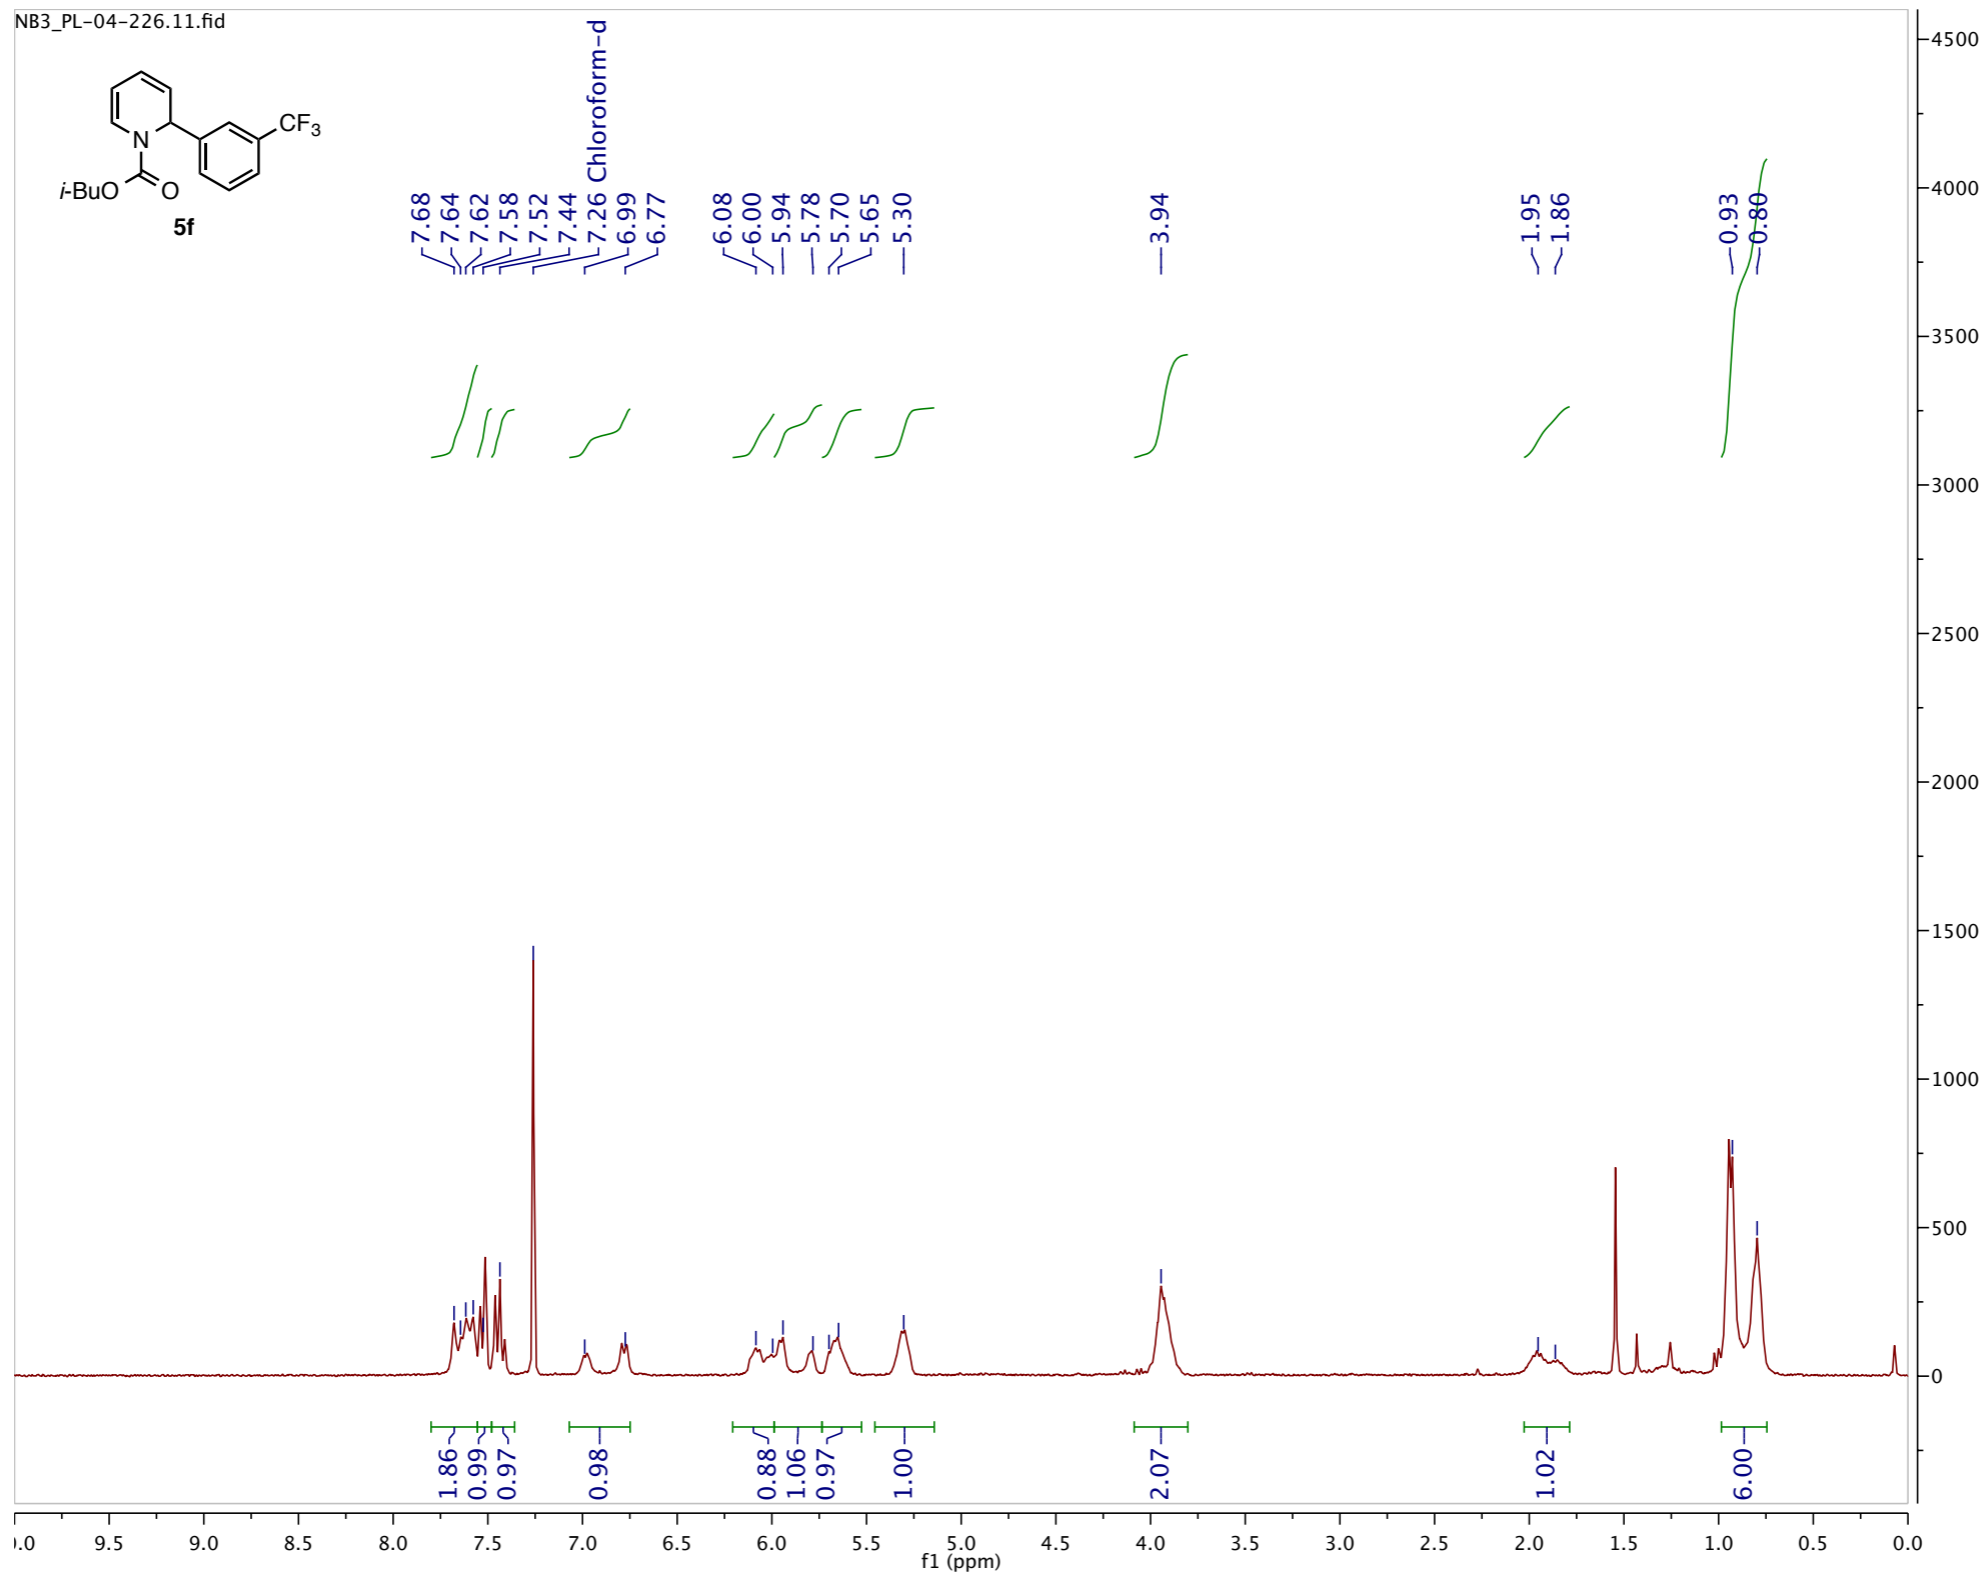

300 MHz <sup>1</sup>H-NMR spectrum of **5f** in CDCl<sub>3</sub>

A2\_33-PL-05-247F\_carbon.10.fid  
C13CPDp1.PU CDCl3 /opt/topspin3.0 jlutz 33

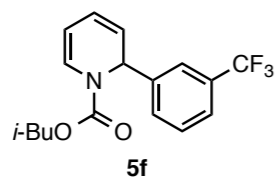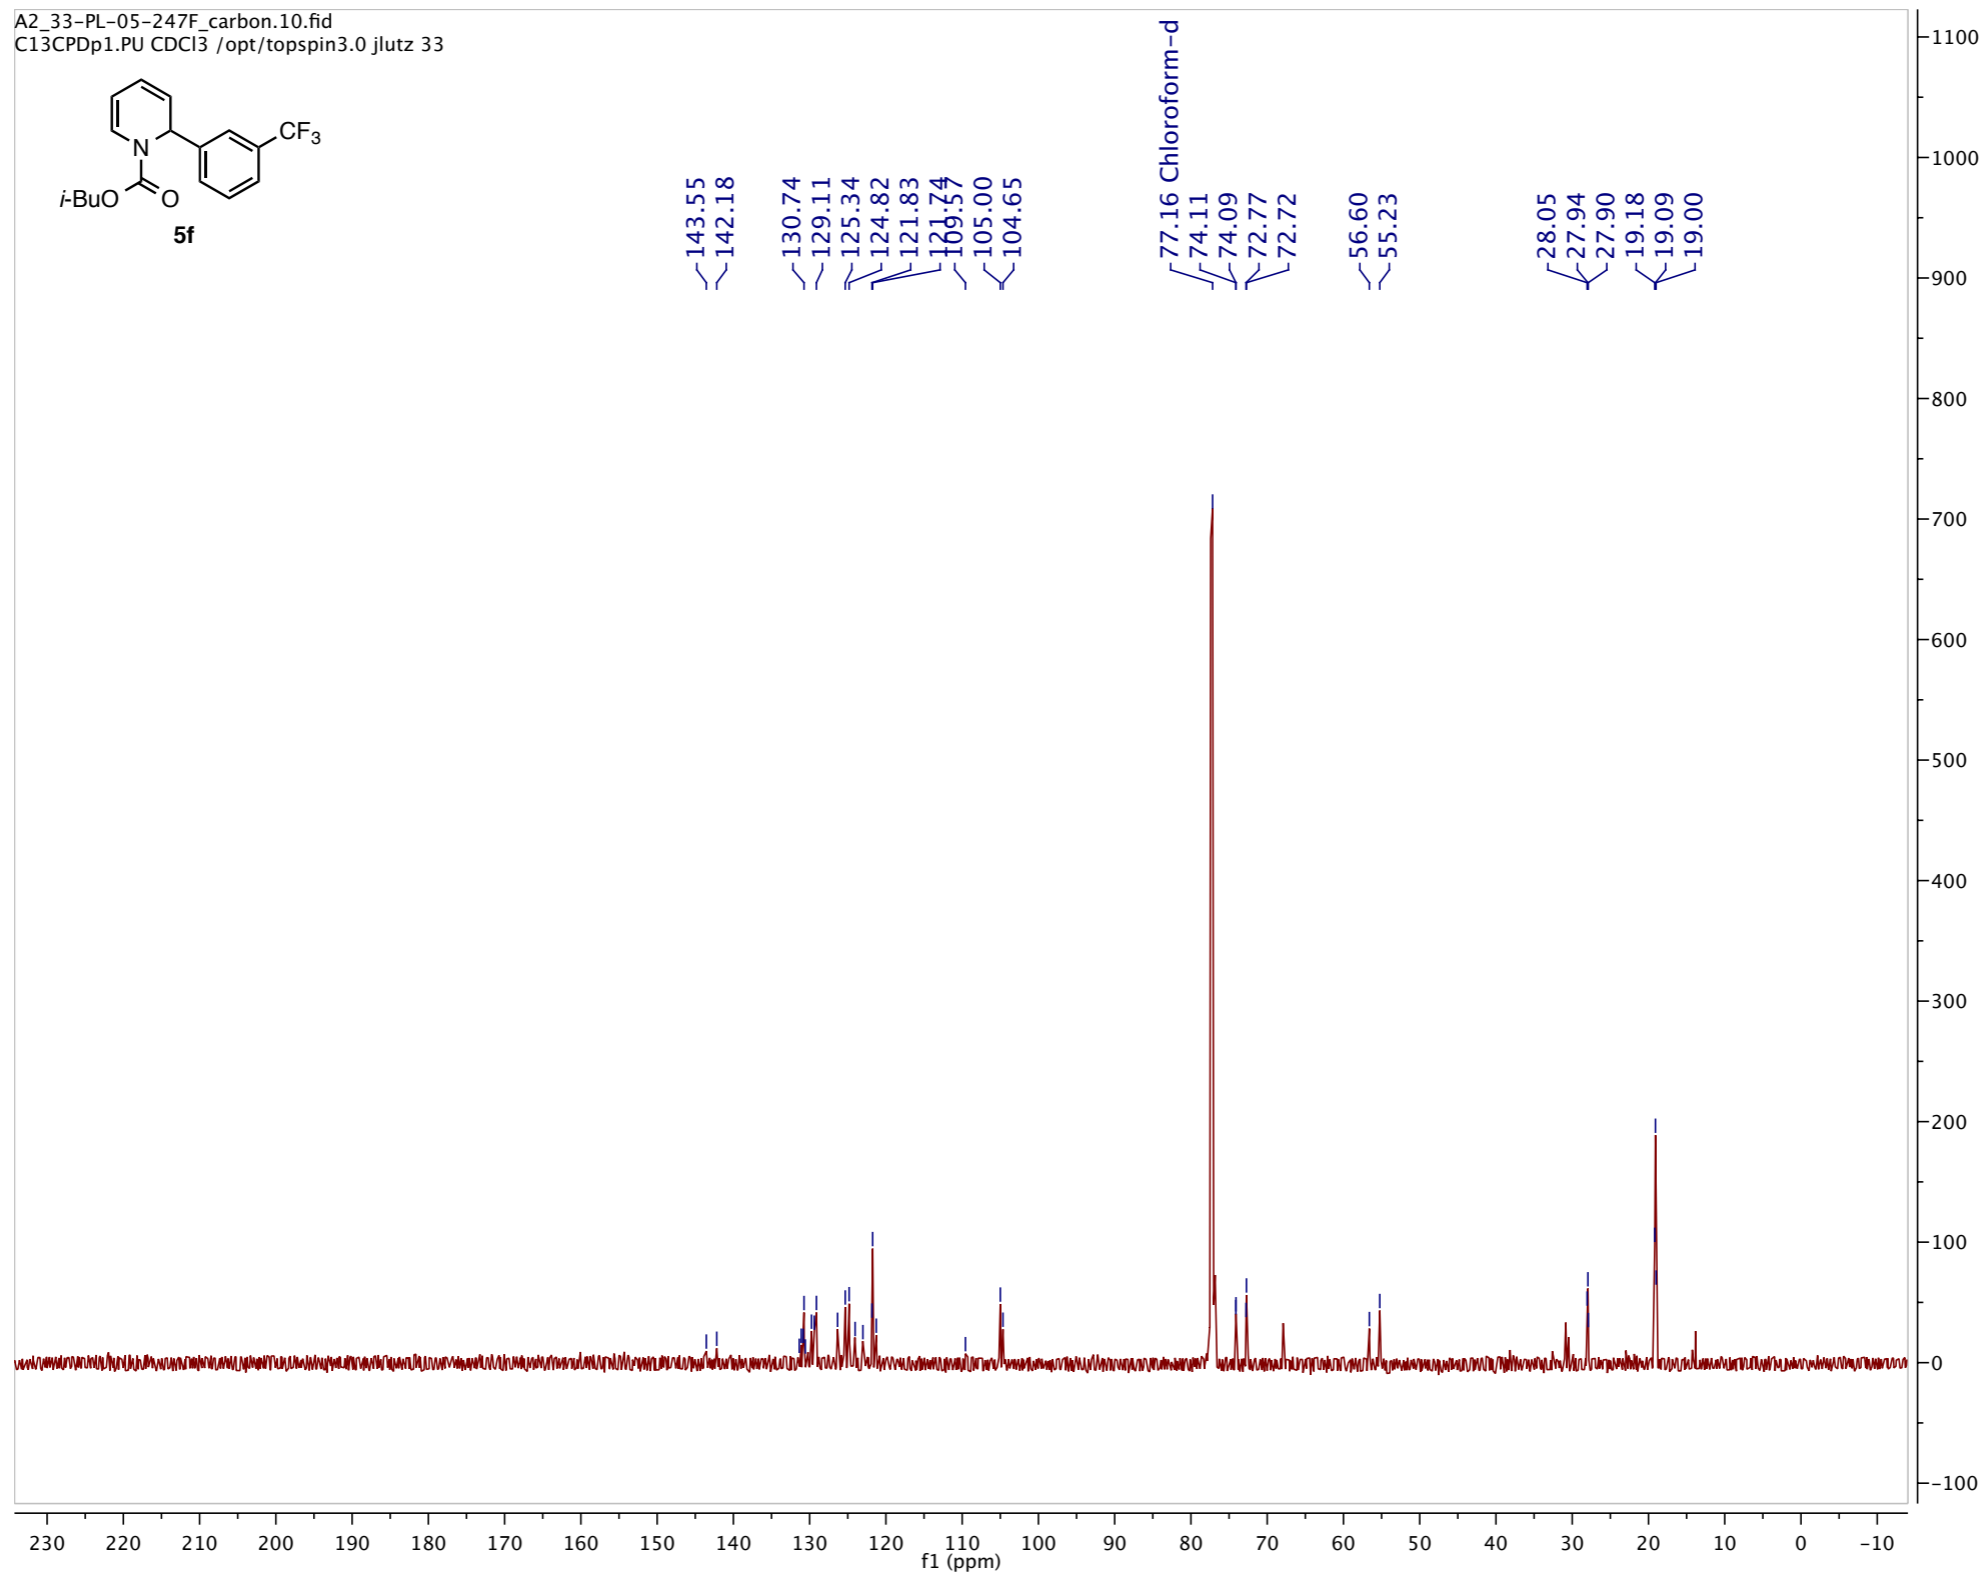

125 MHz  $^{13}\text{C}$ -NMR spectrum of **5f** in  $\text{CDCl}_3$

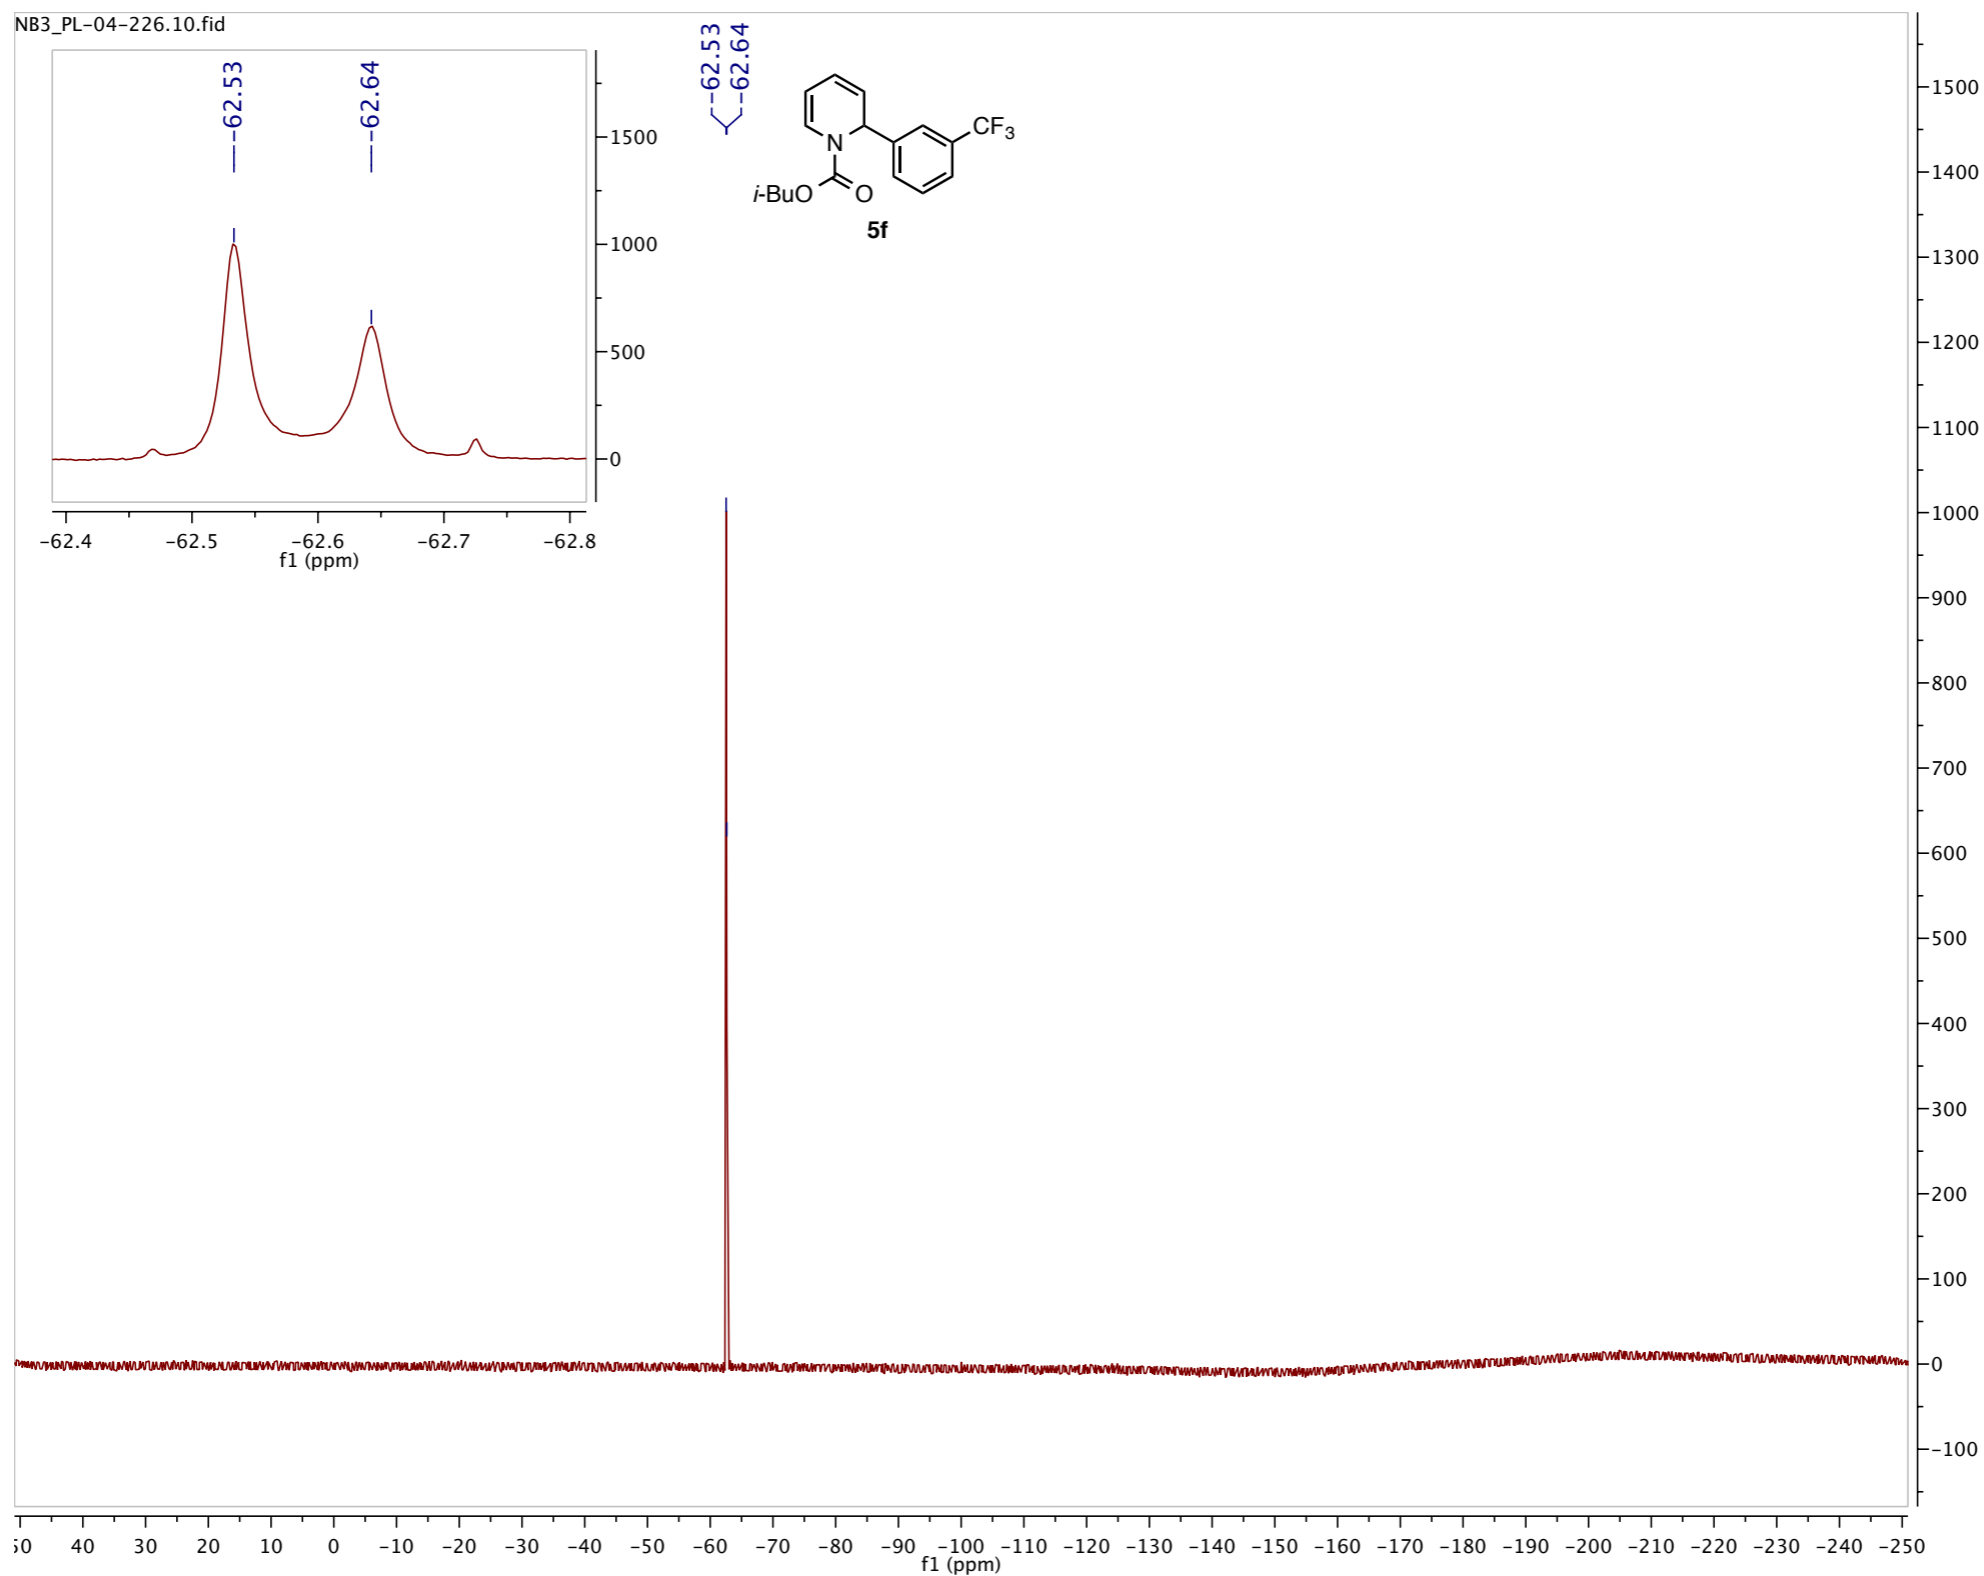

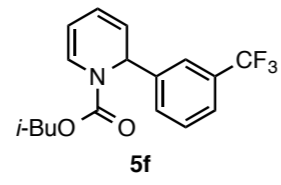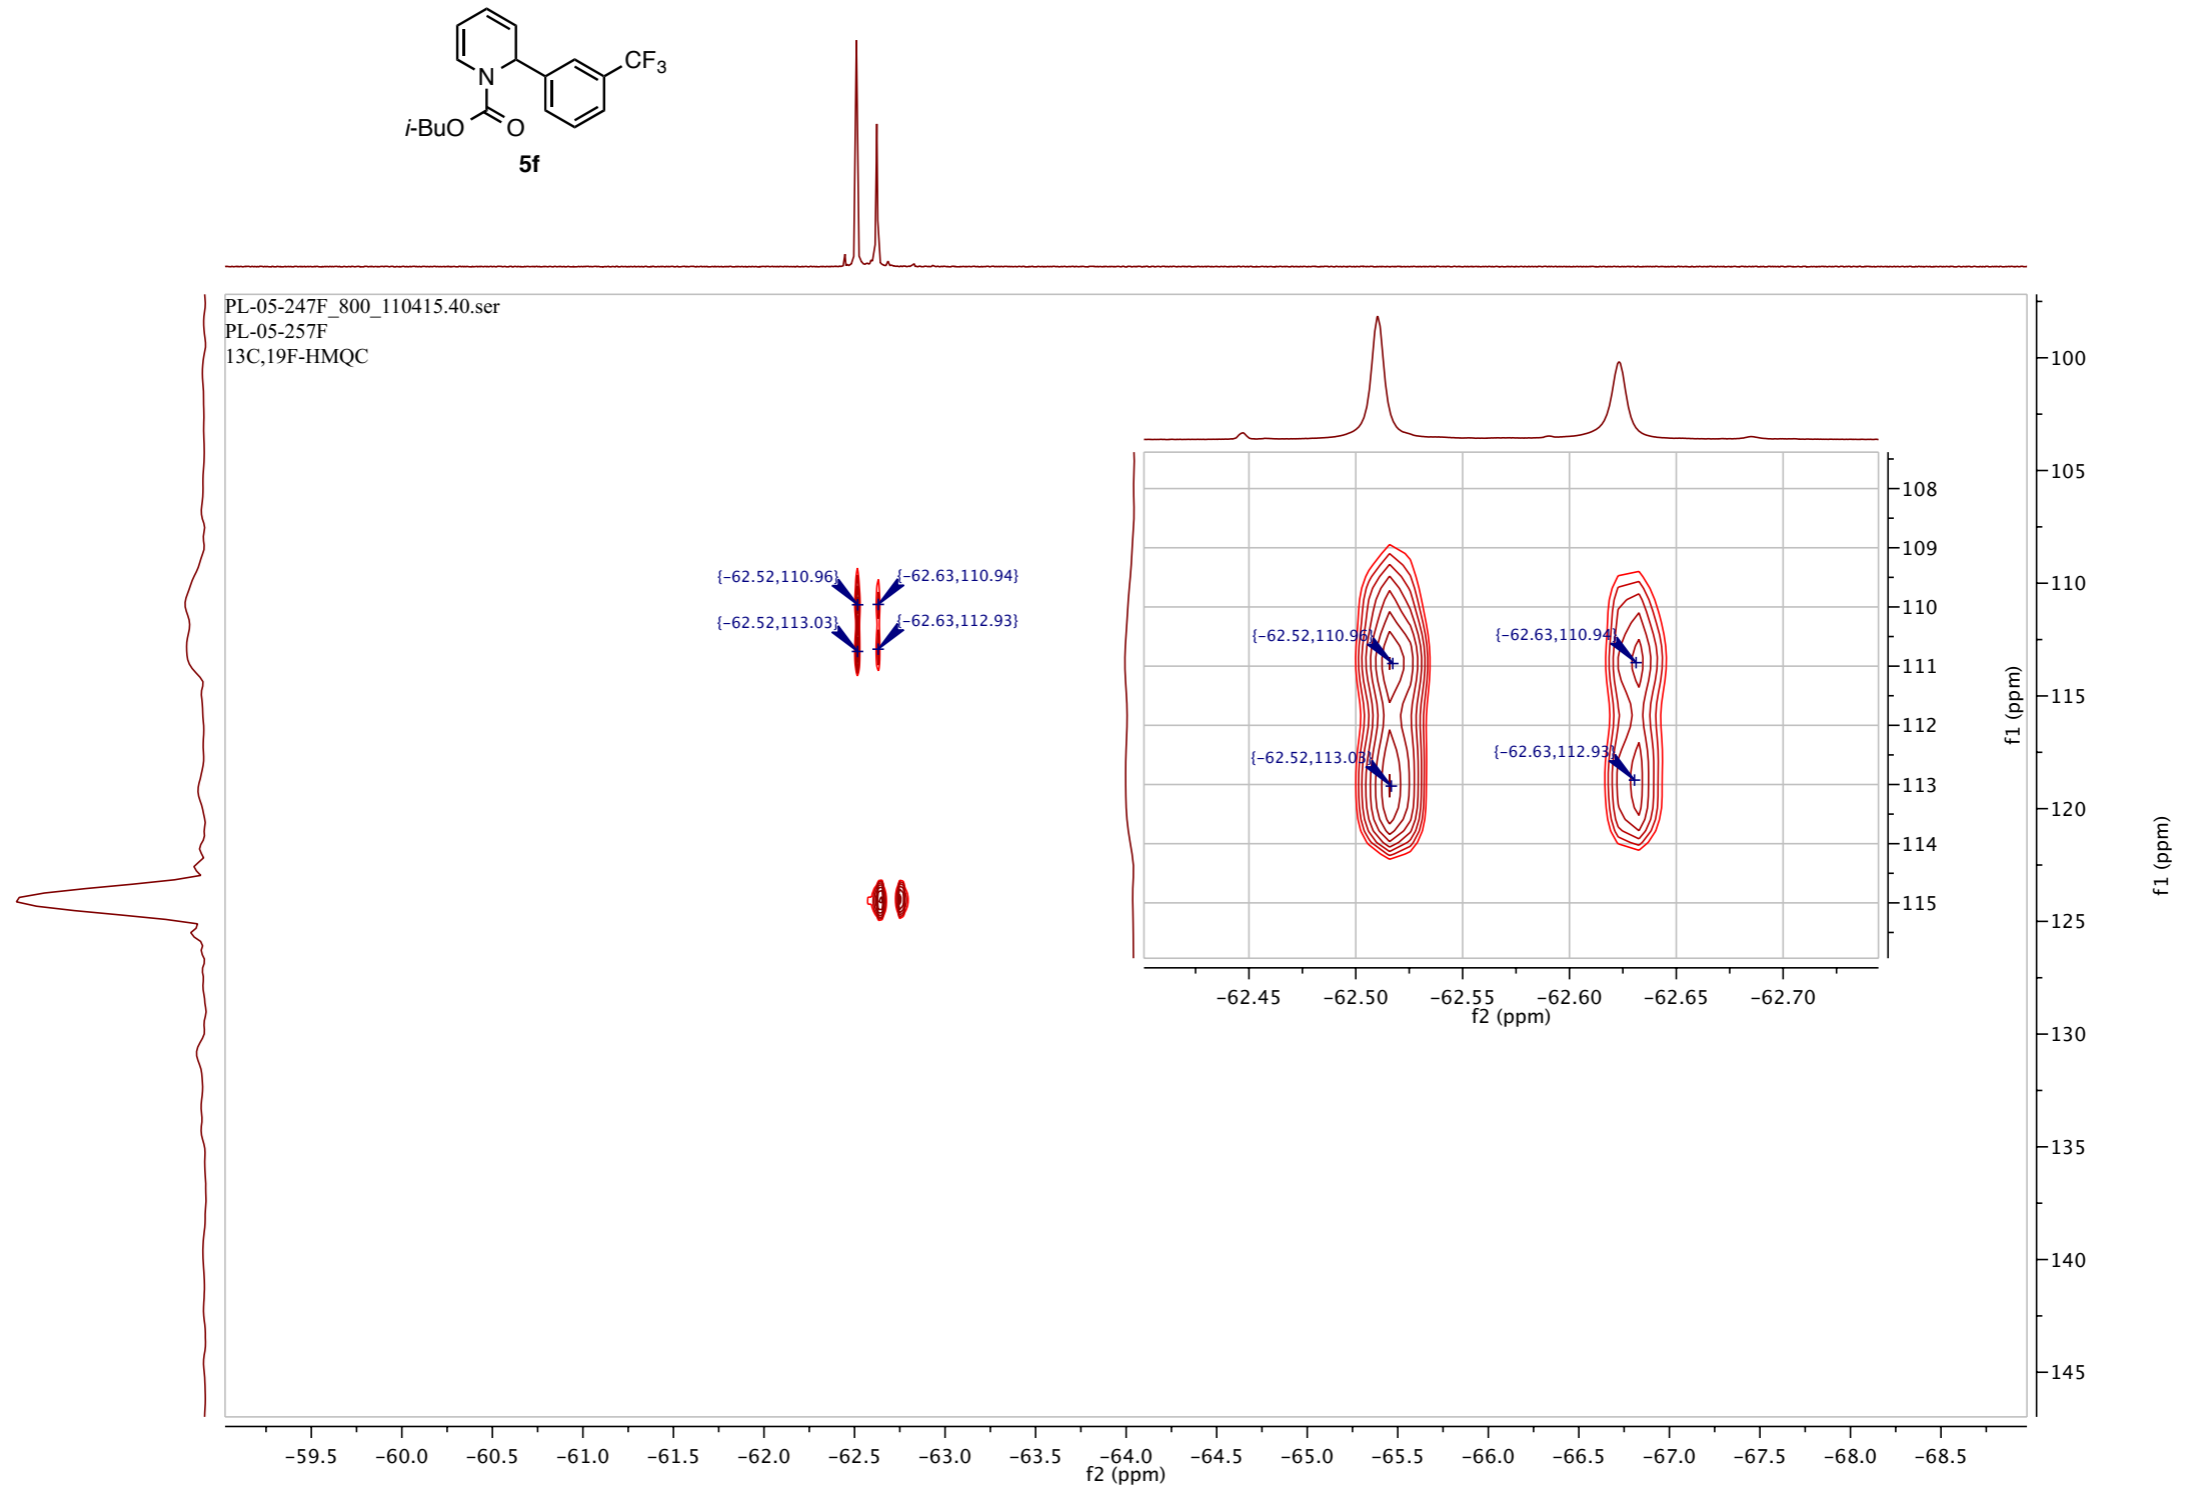

$^{13}\text{C}, ^{19}\text{F}$ -HMQC spectrum of **5f** in  $\text{CDCl}_3$

NB3\_PL-03-186.10.fid

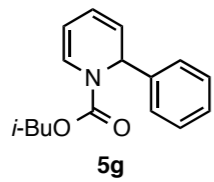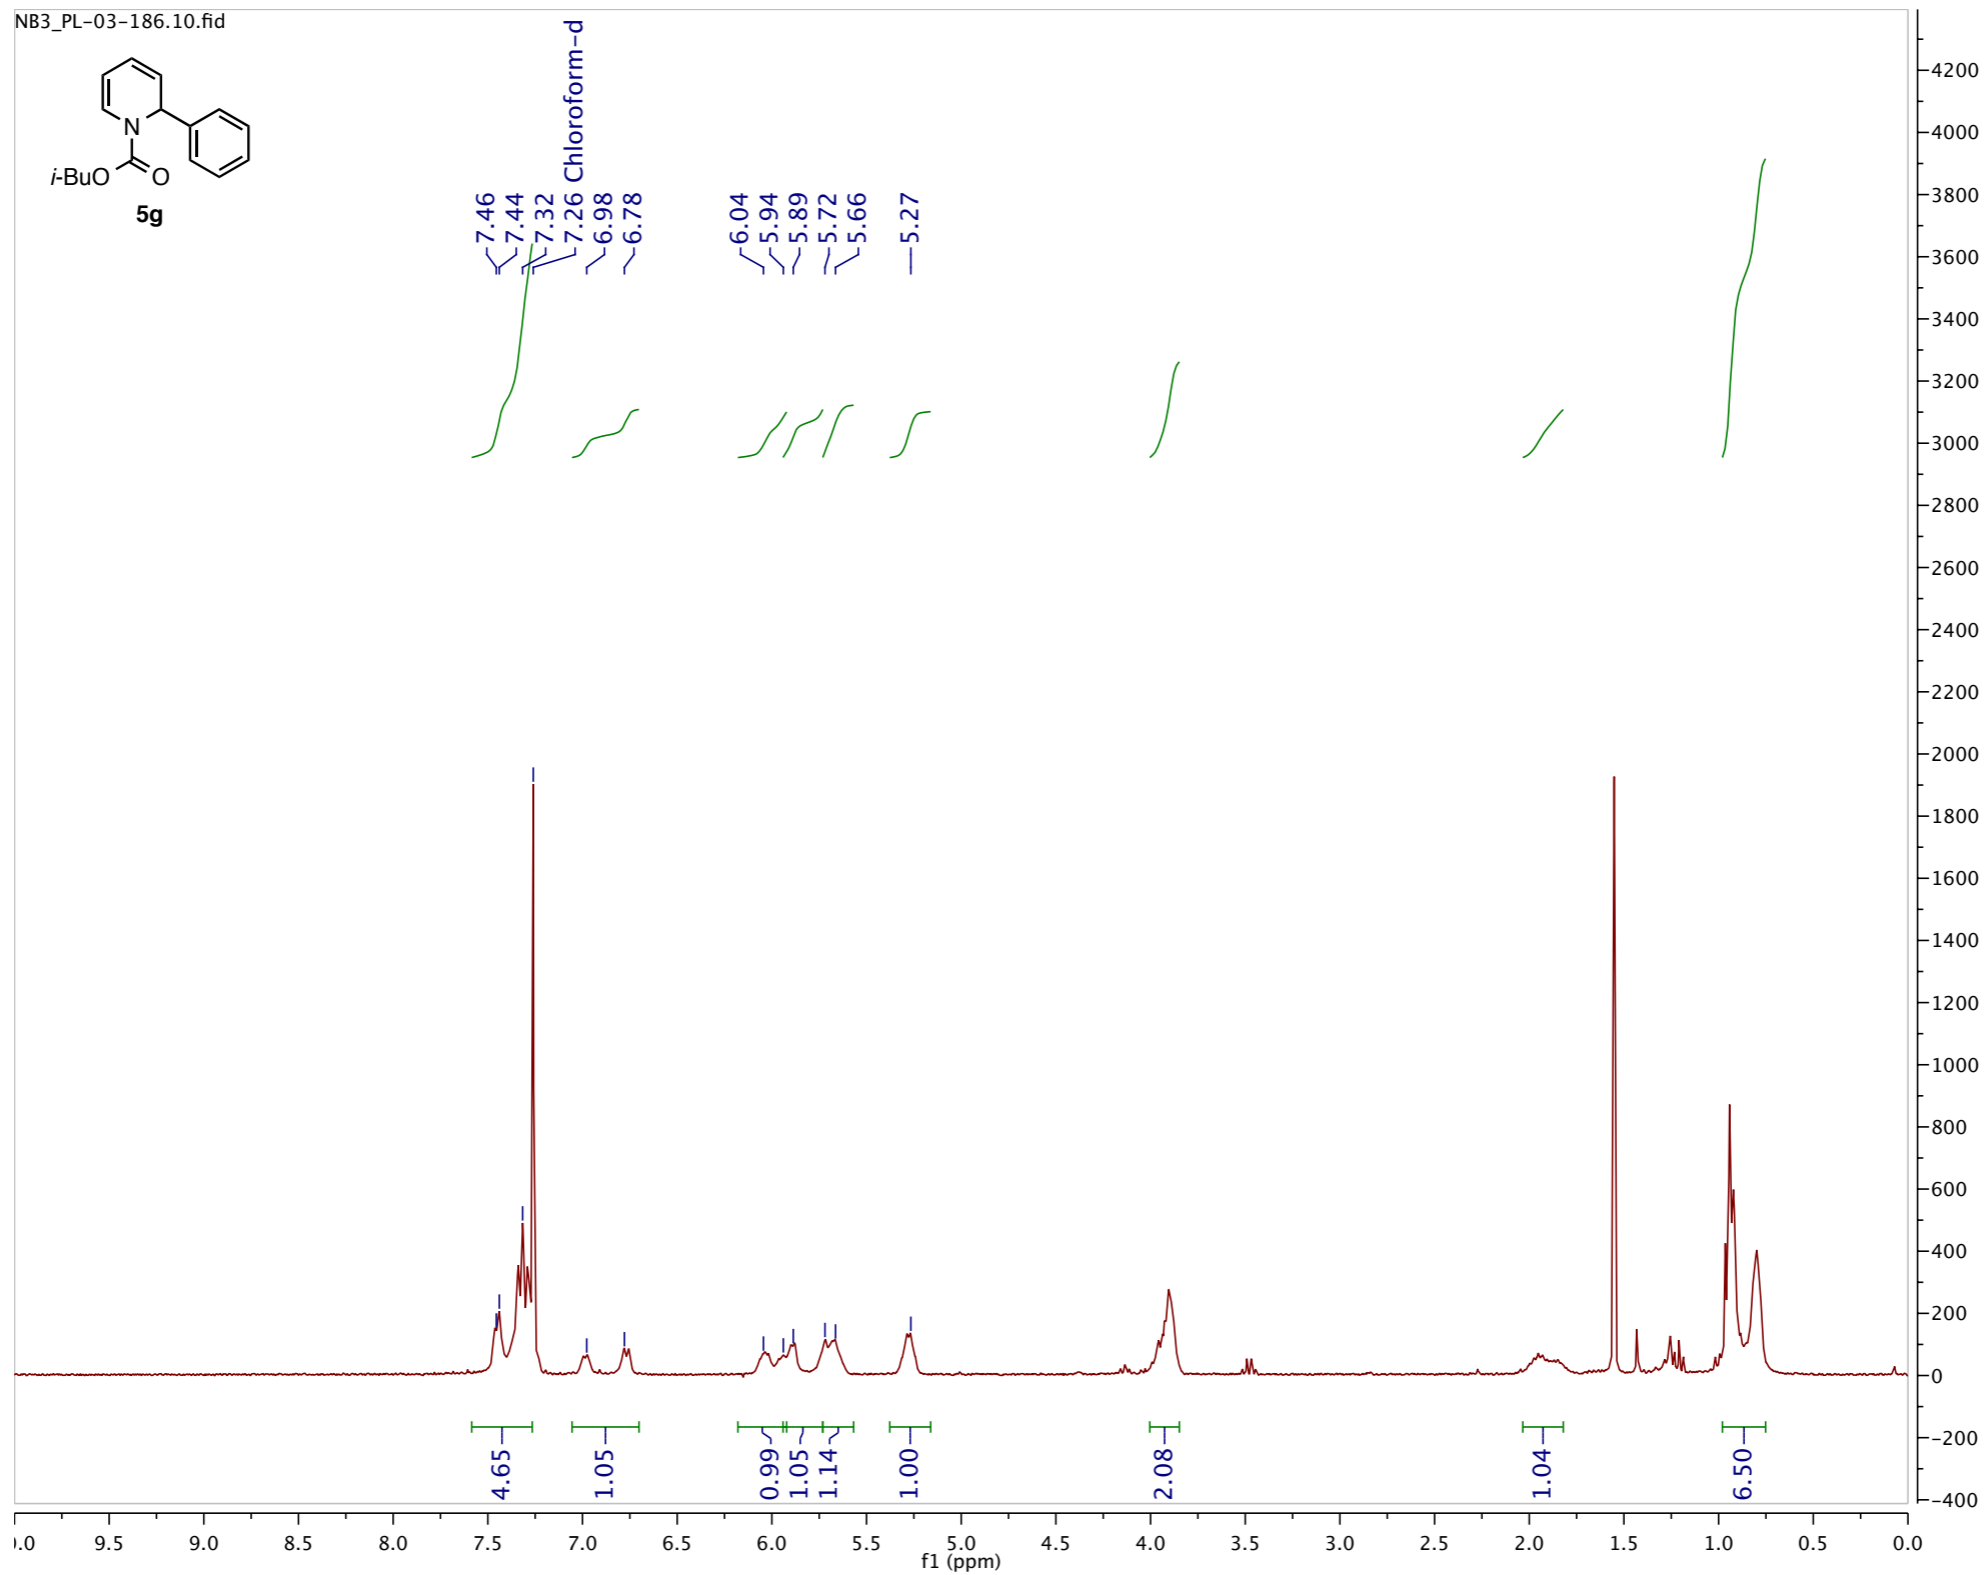

A2\_37-PL-05-247G\_carbon.10.fid  
C13CPDp1.PU CDCl3 /opt/topspin3.0 jlutz 37

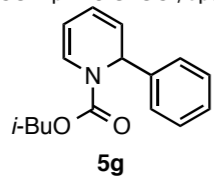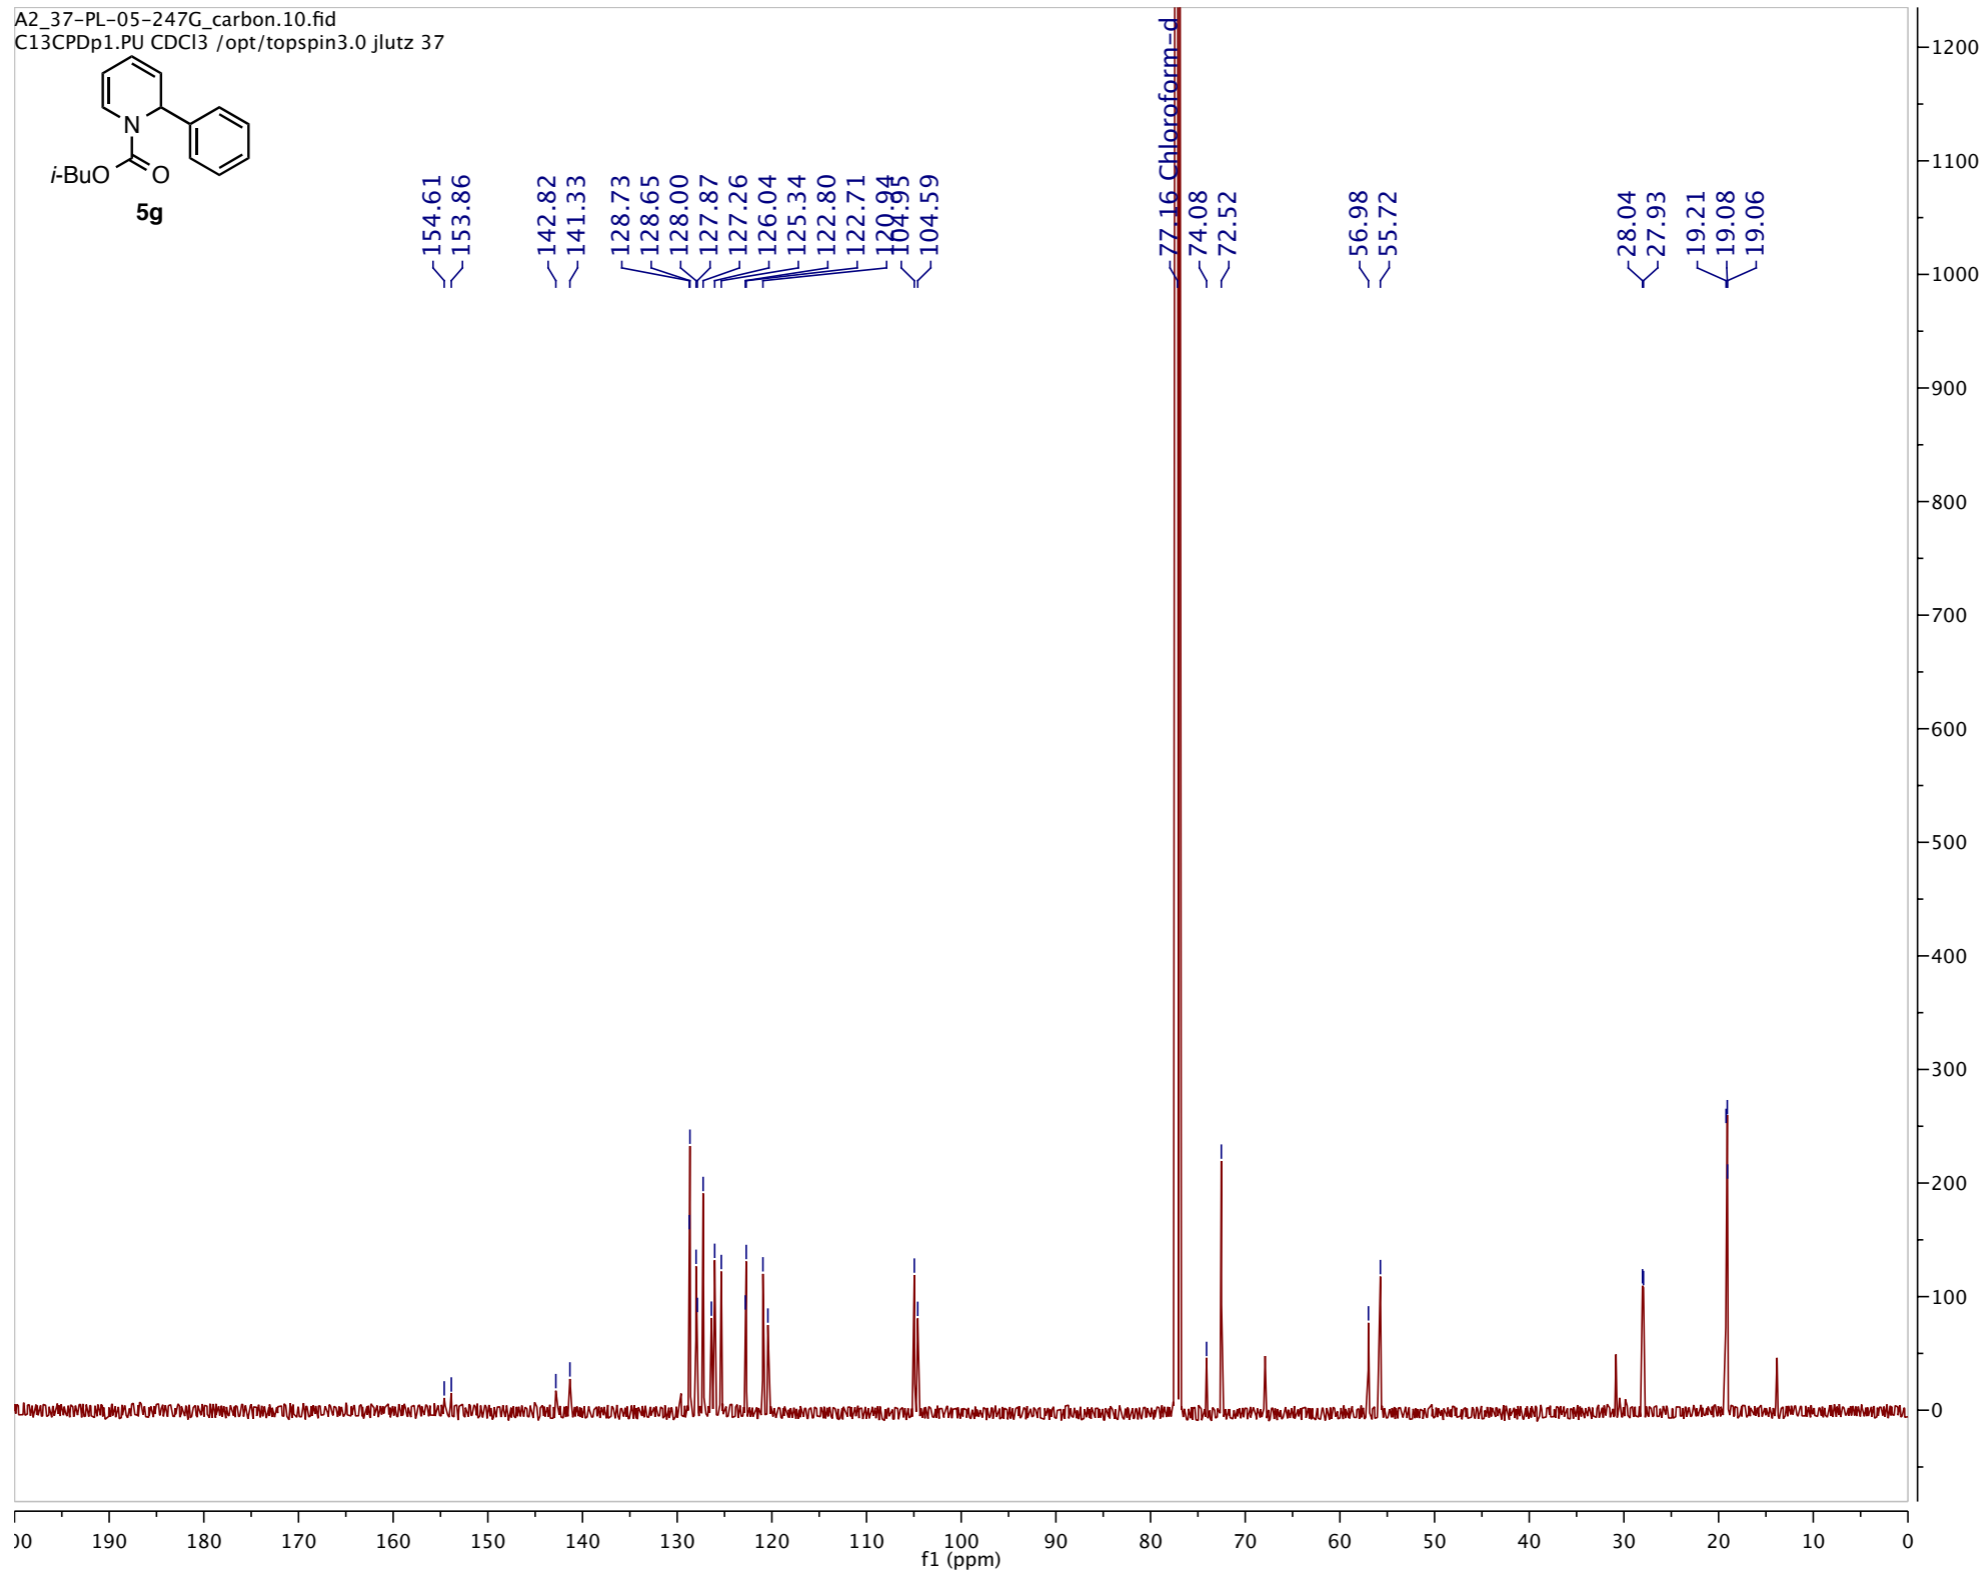

NB3\_PL-03-219.10.fid

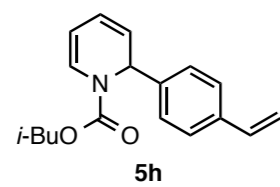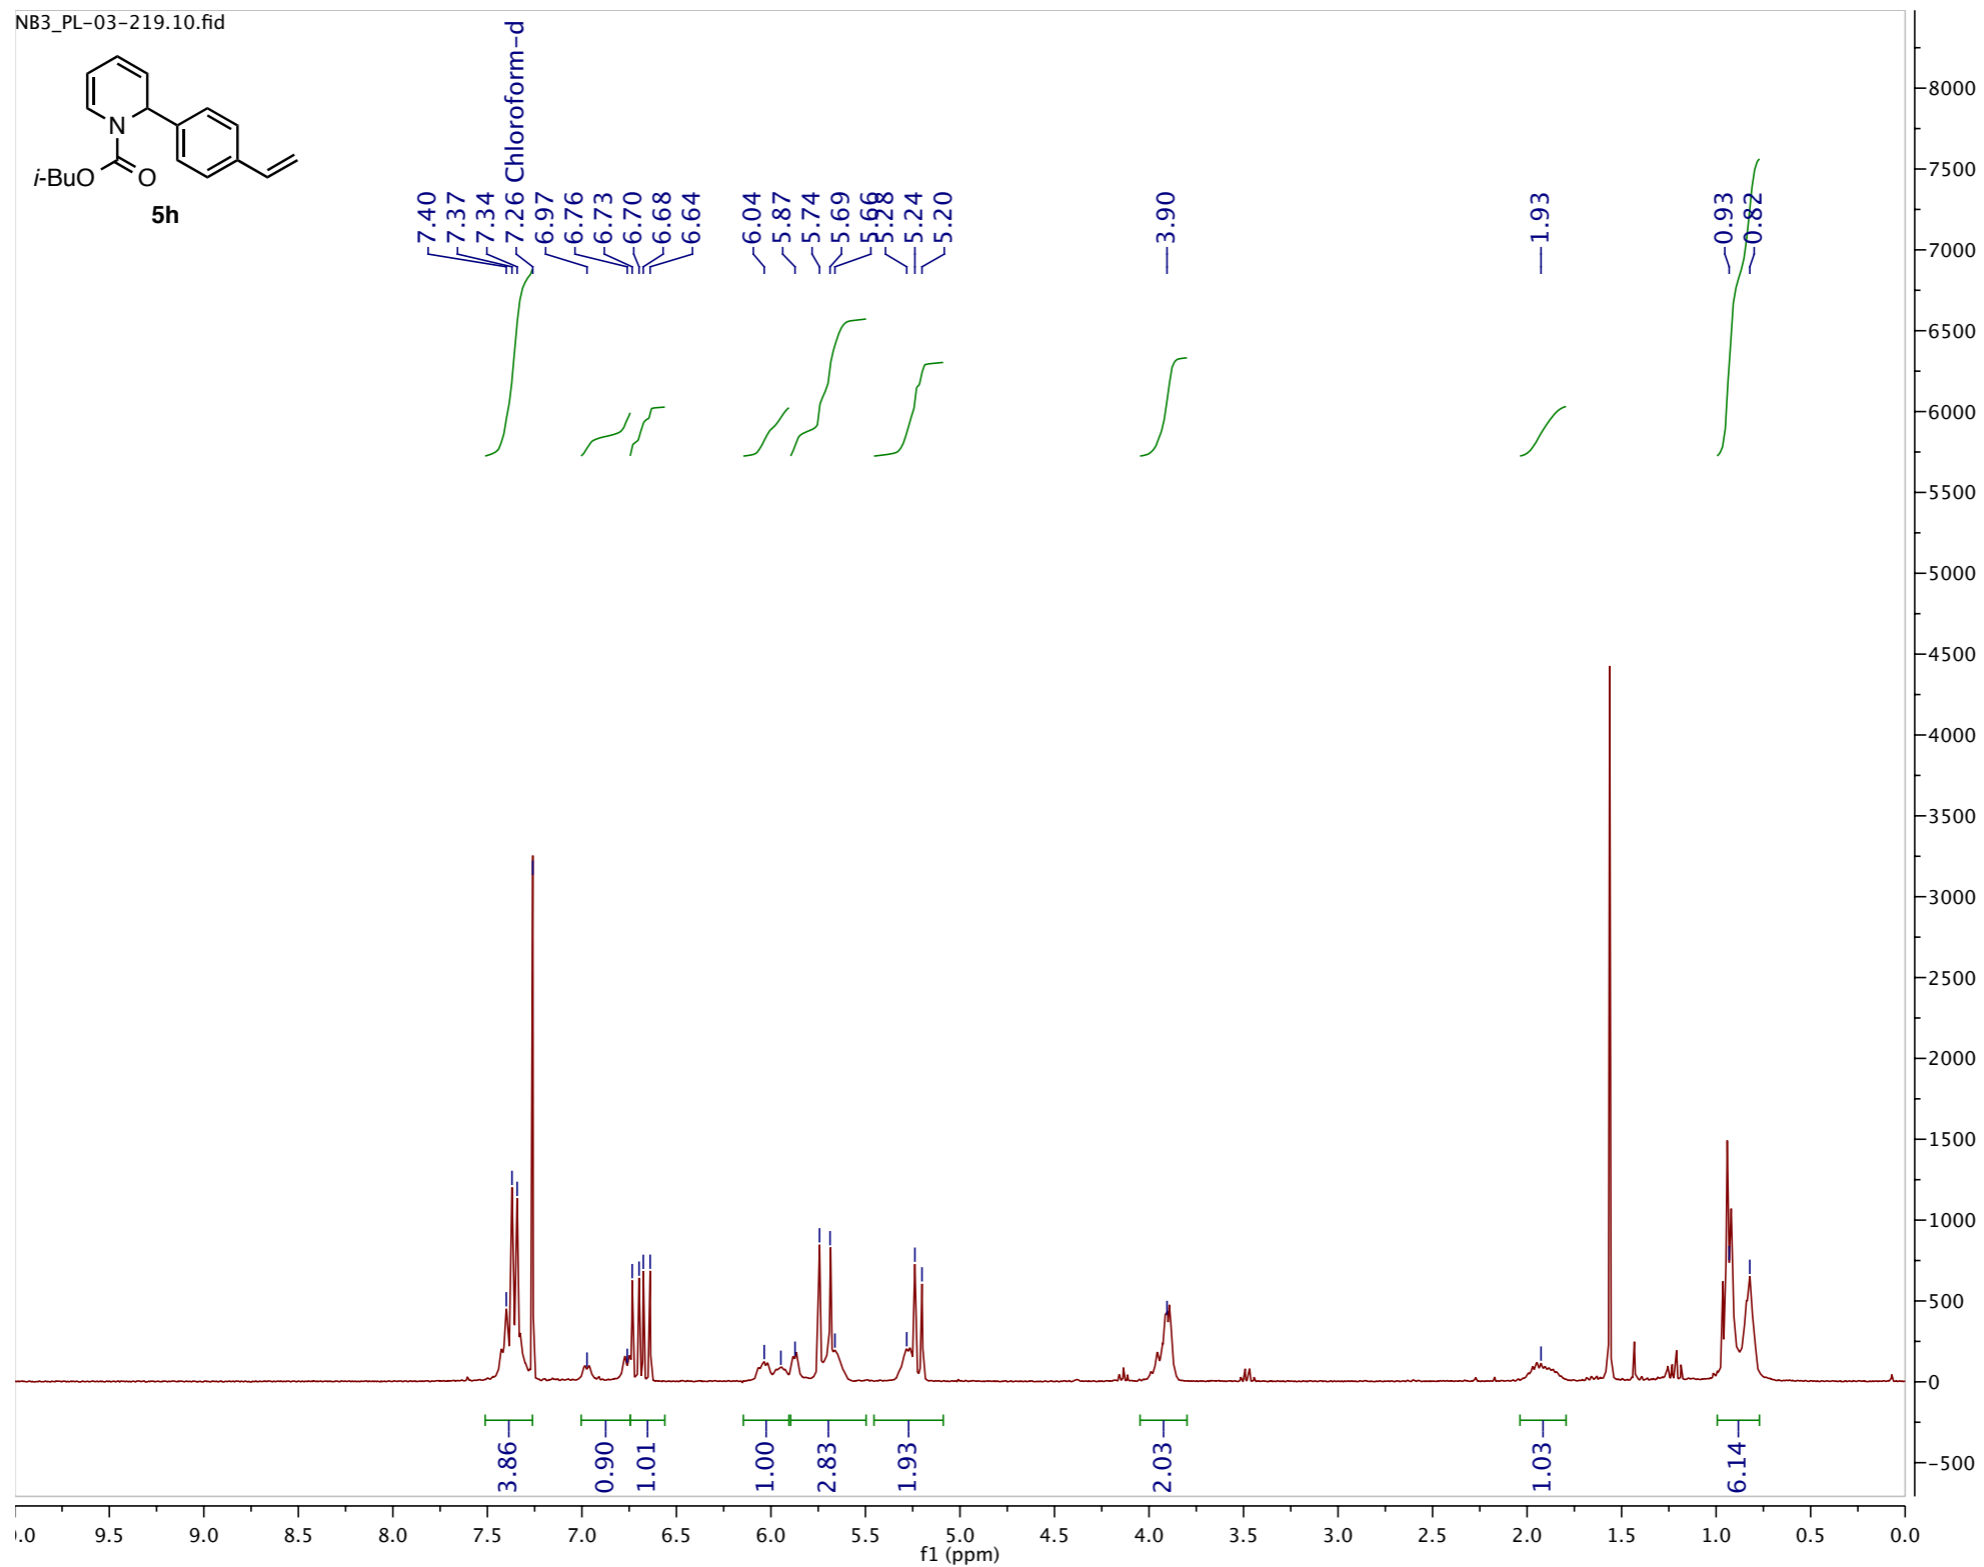



A2\_34-PL-05-245H\_carbon.10.fid  
C13CPDp1.PU CDCl3 /opt/topspin3.0 jlutz 34

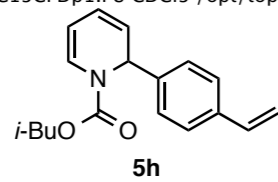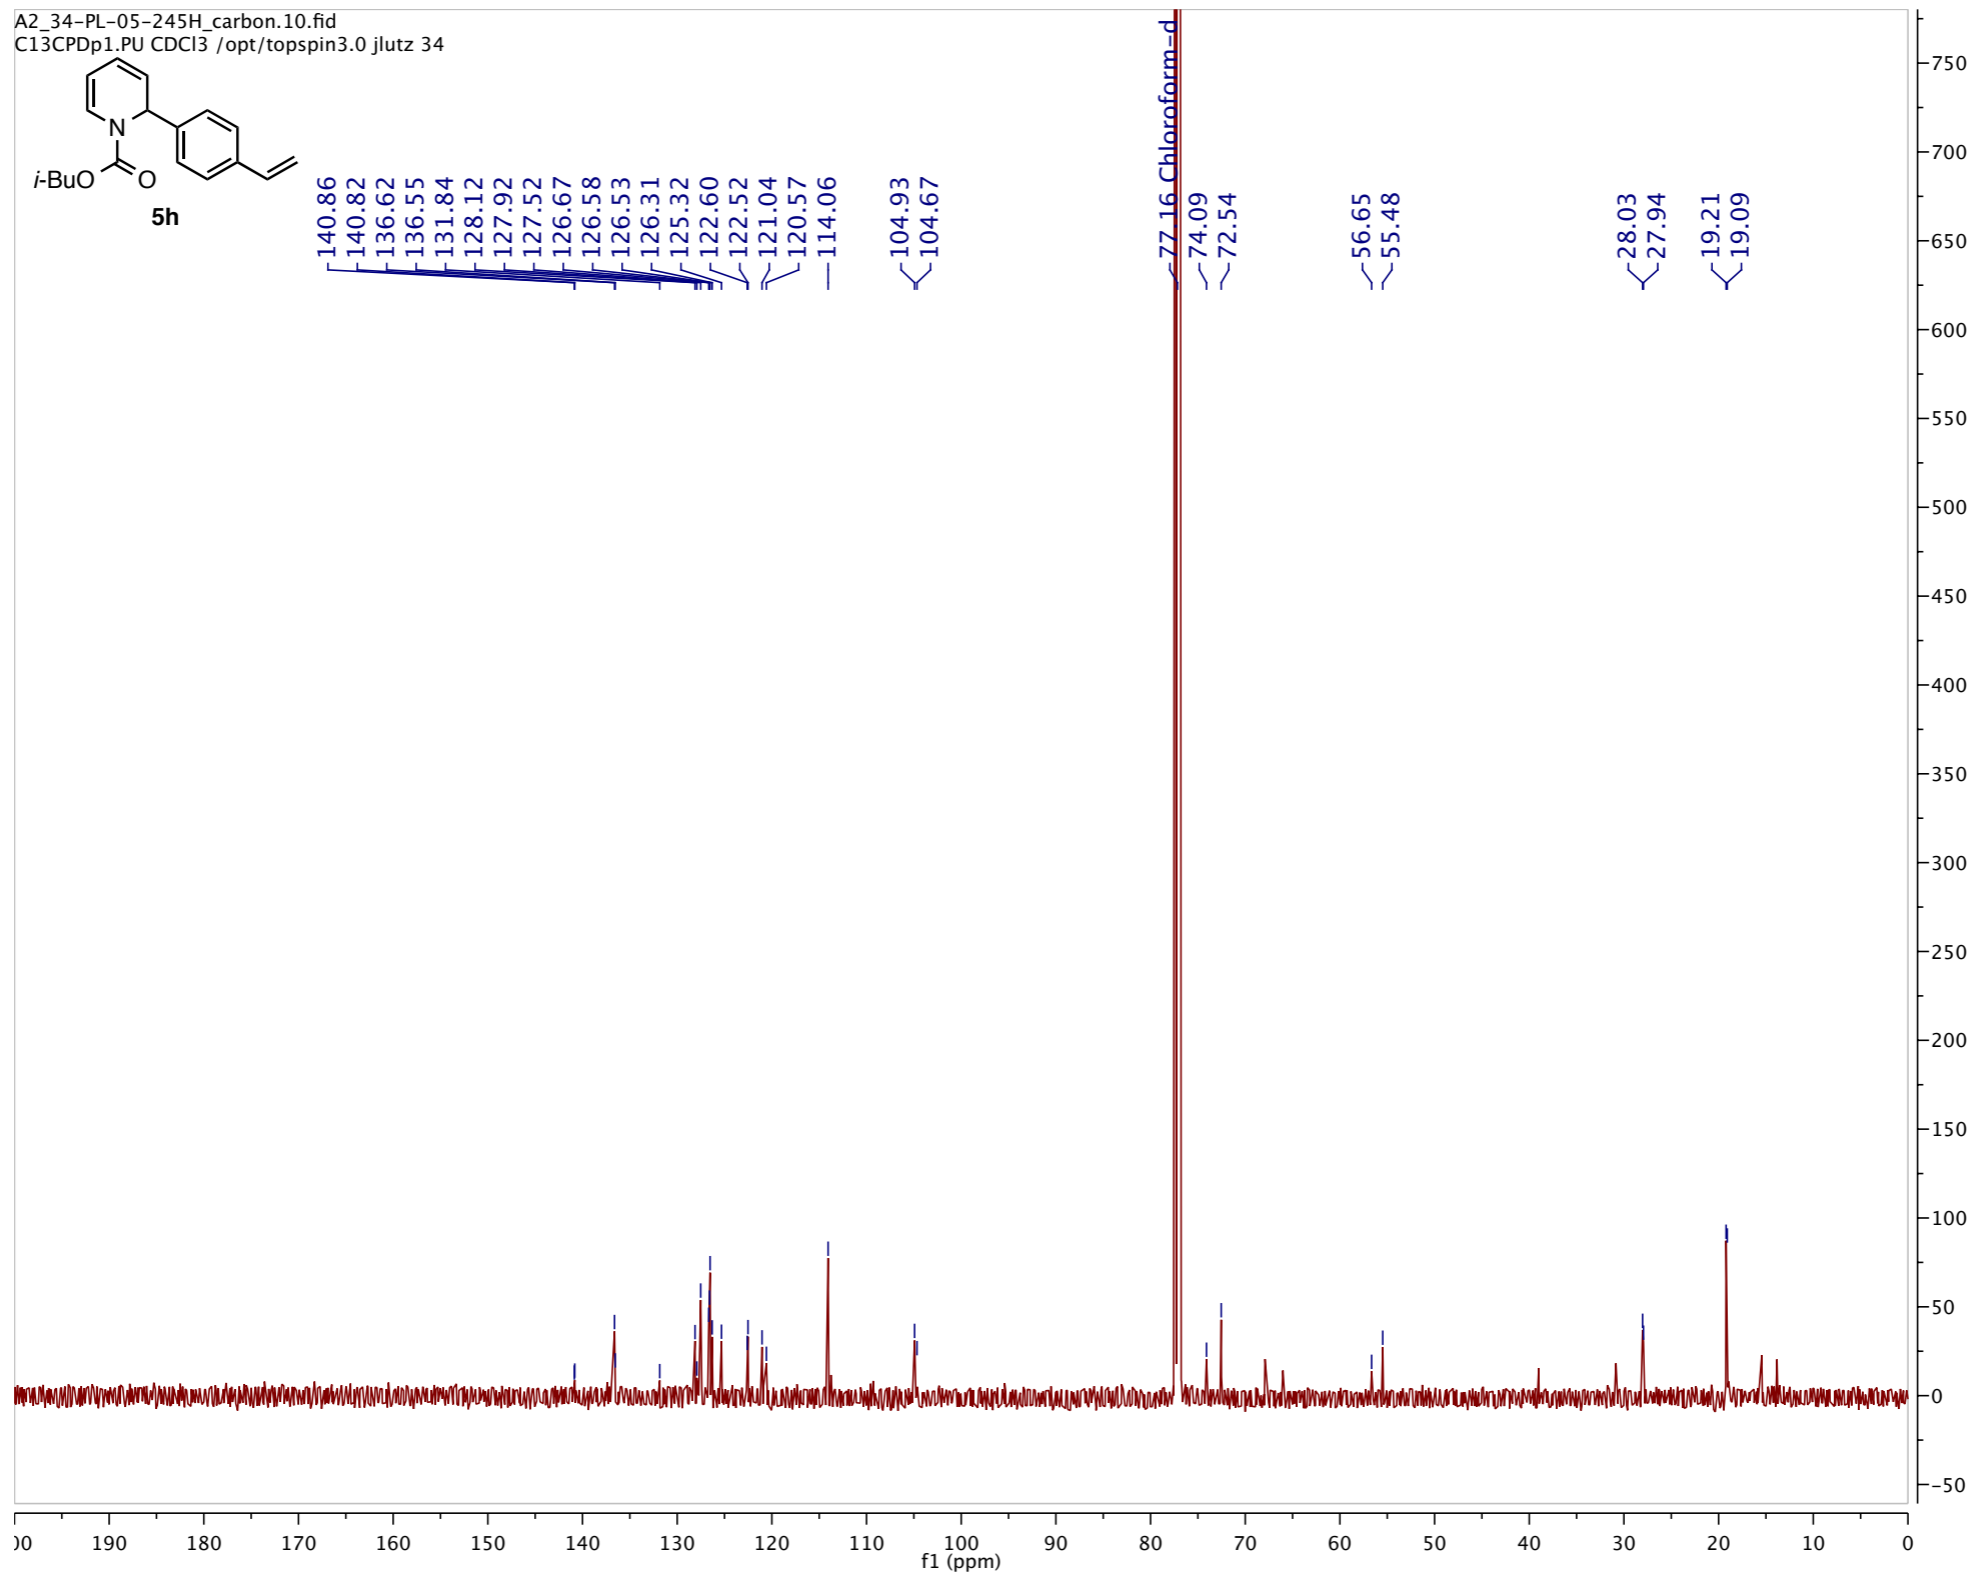

125 MHz  $^{13}\text{C}$ -NMR spectrum of **5h** in  $\text{CDCl}_3$

NB3\_PL-03-244.10.fid

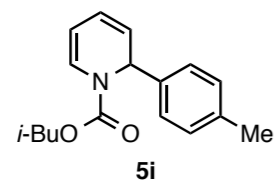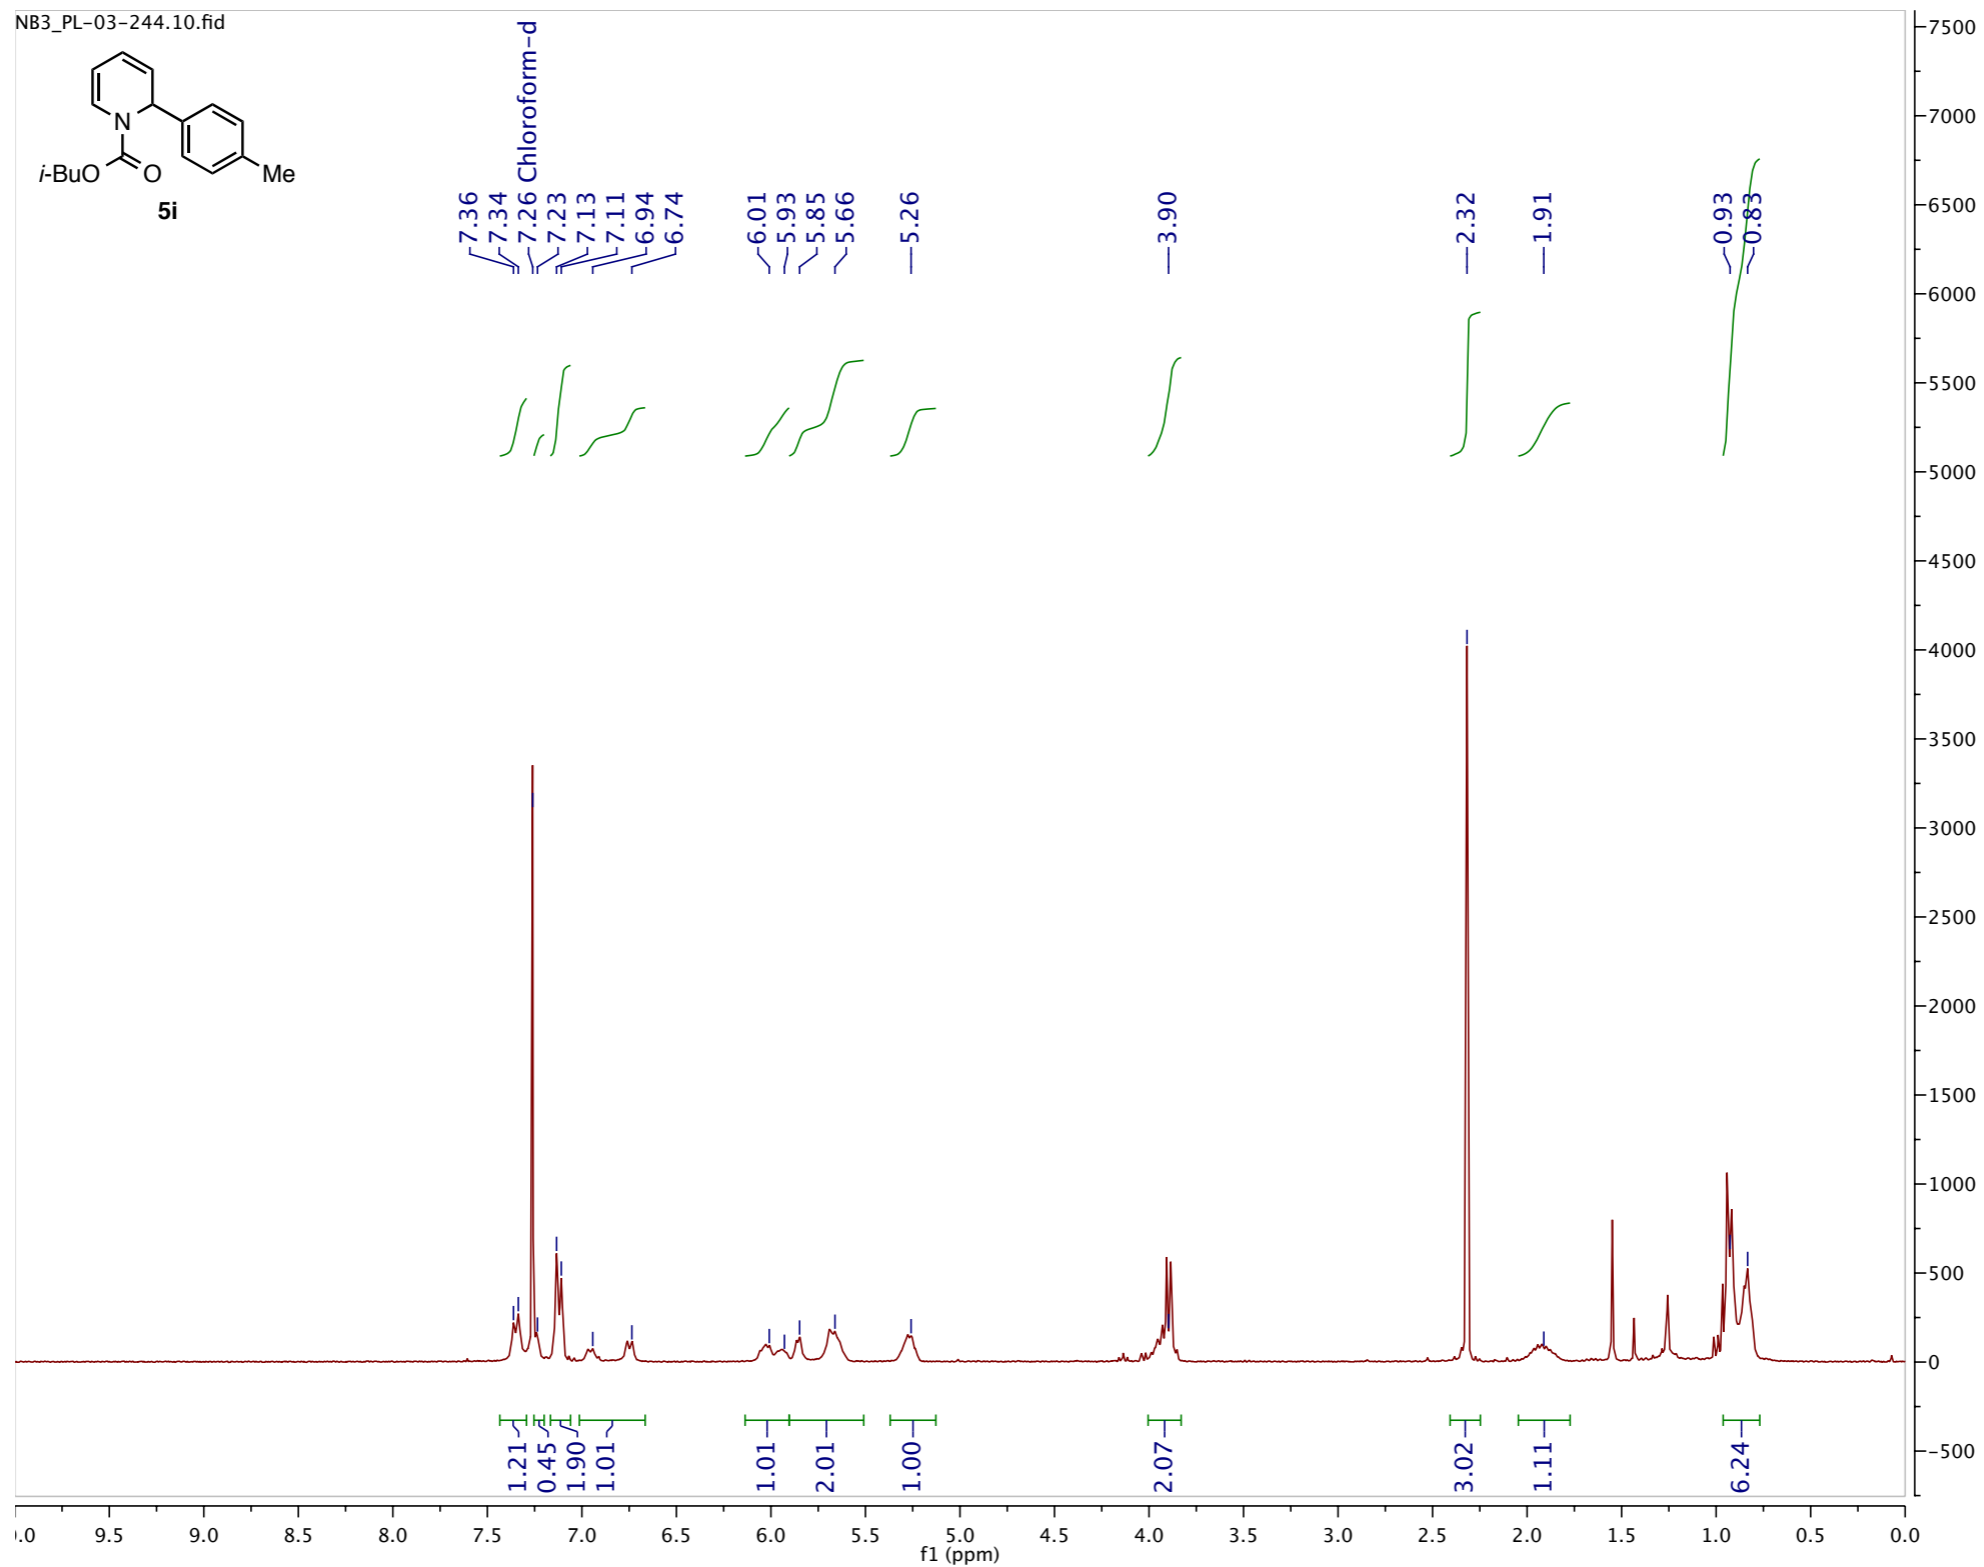

300 MHz <sup>1</sup>H-NMR spectrum of **5i** in CDCl<sub>3</sub>

A2\_33-PL-05-245\_I\_carbon.10.fid  
C13CPDp1\_PU CDCl3 /opt/topspin3.0 jlutz 35

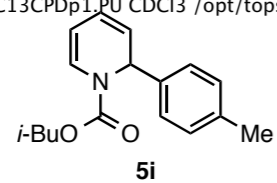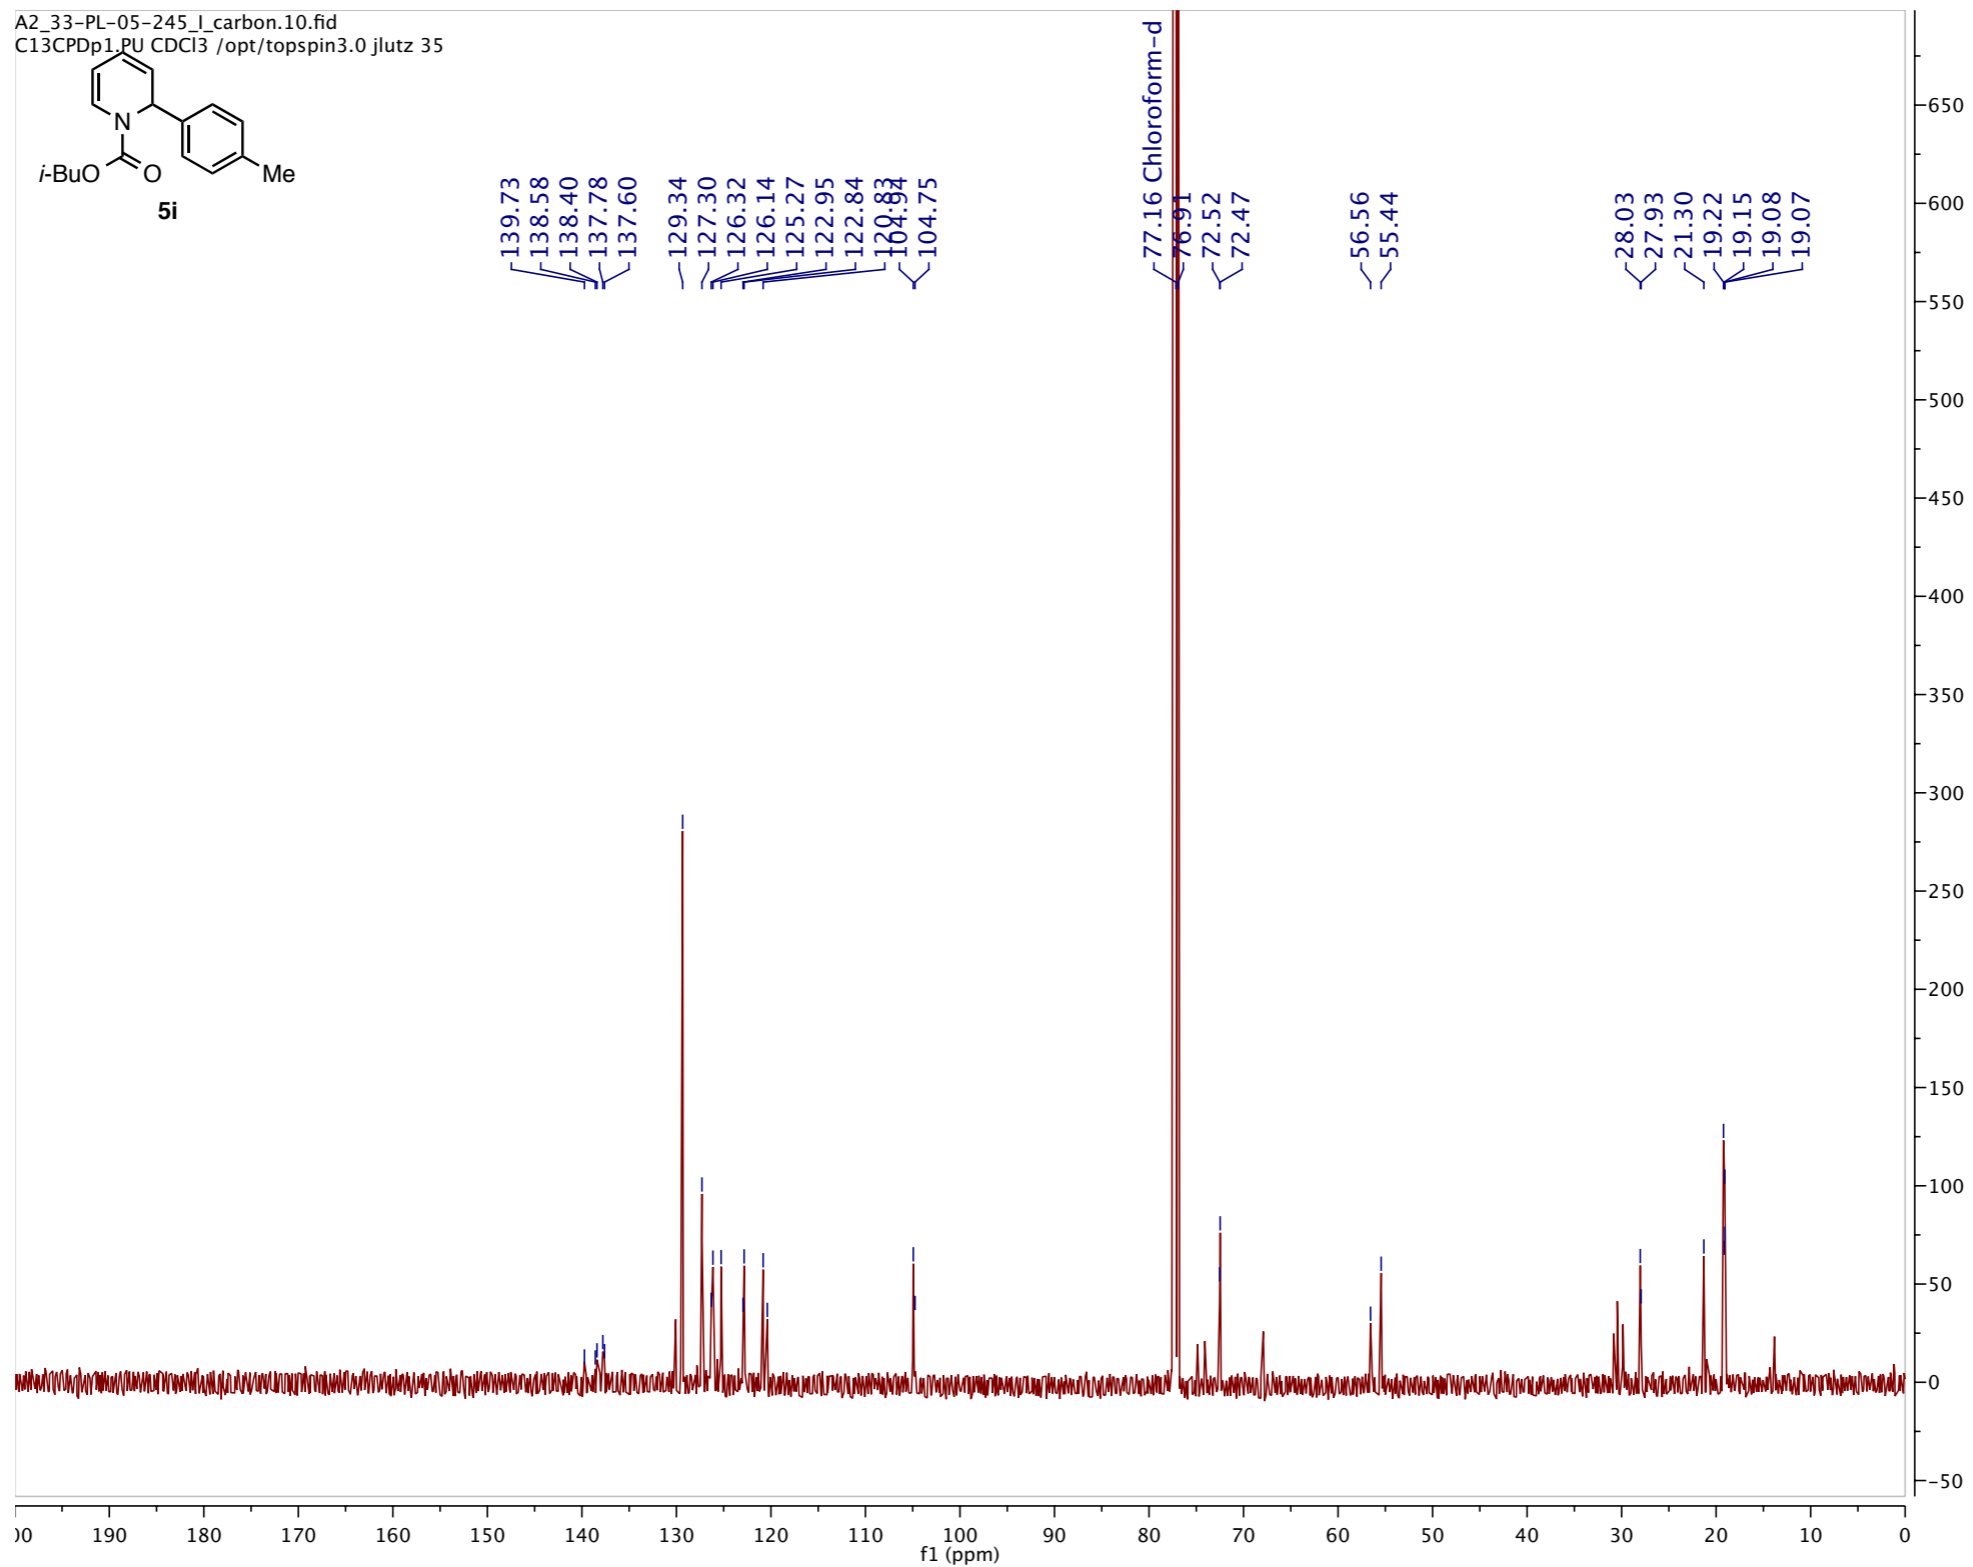

125 MHz <sup>13</sup>C-NMR spectrum of **5i** in CDCl<sub>3</sub>

NB3\_PL-03-218.10.fid

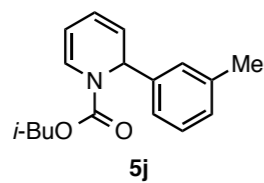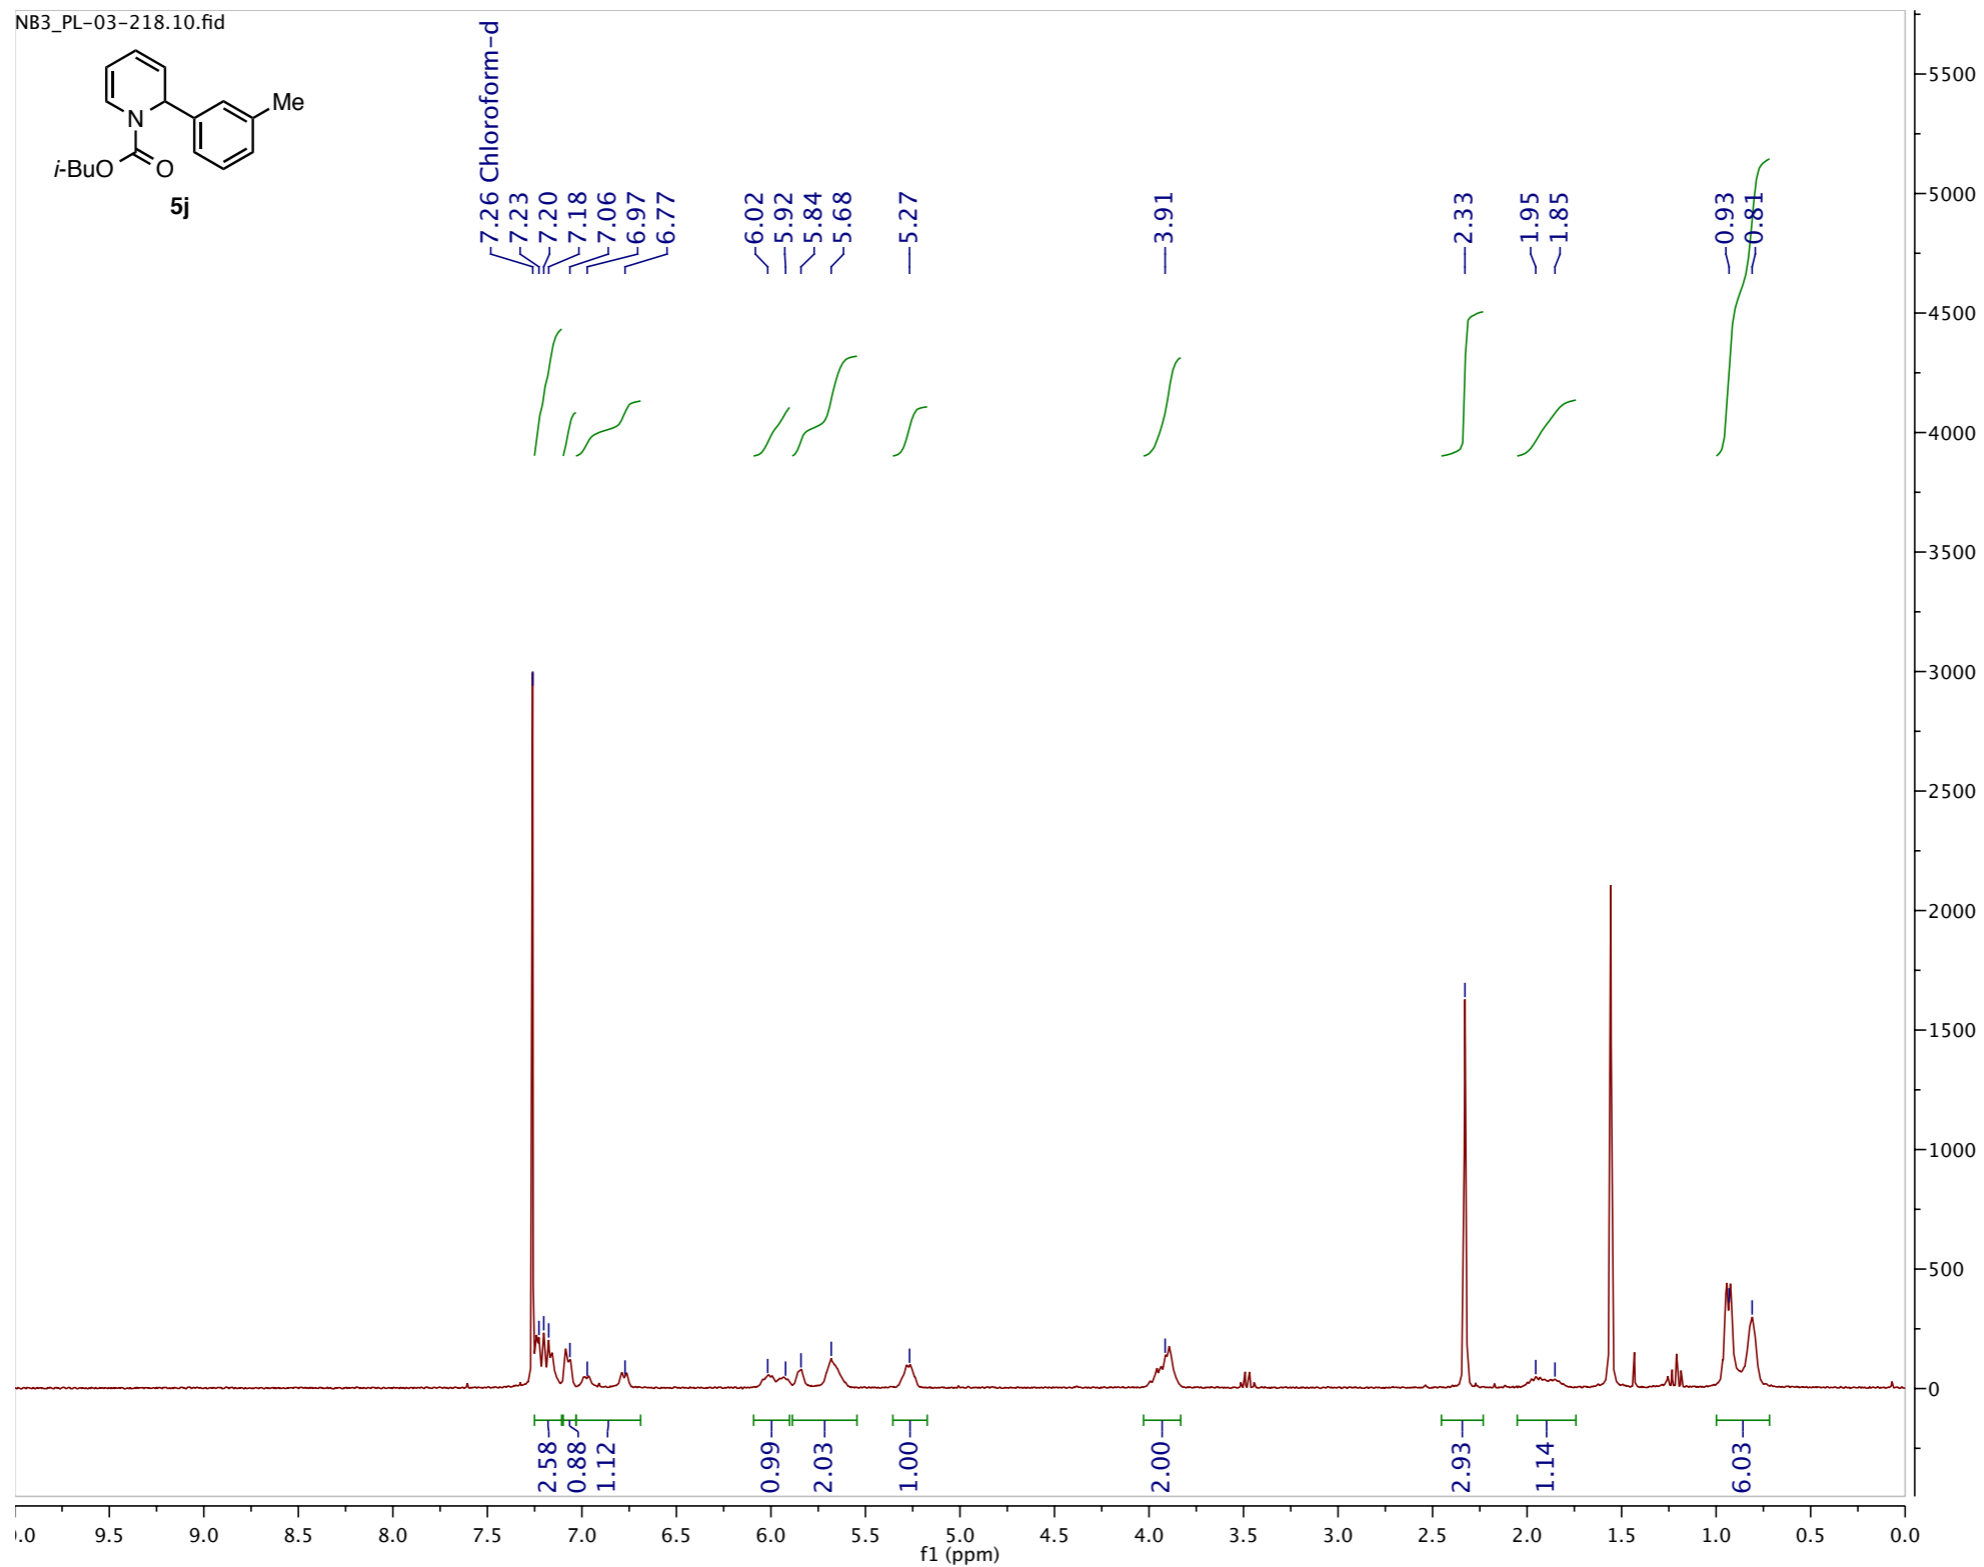

300 MHz <sup>1</sup>H-NMR spectrum of **5j** in CDCl<sub>3</sub>

A2\_27-PL-05-247J\_carbon.10.fid  
C13CPDp1.PU CDCl3 /opt/topspin3.0 jlutz 27

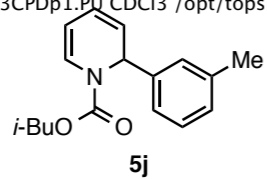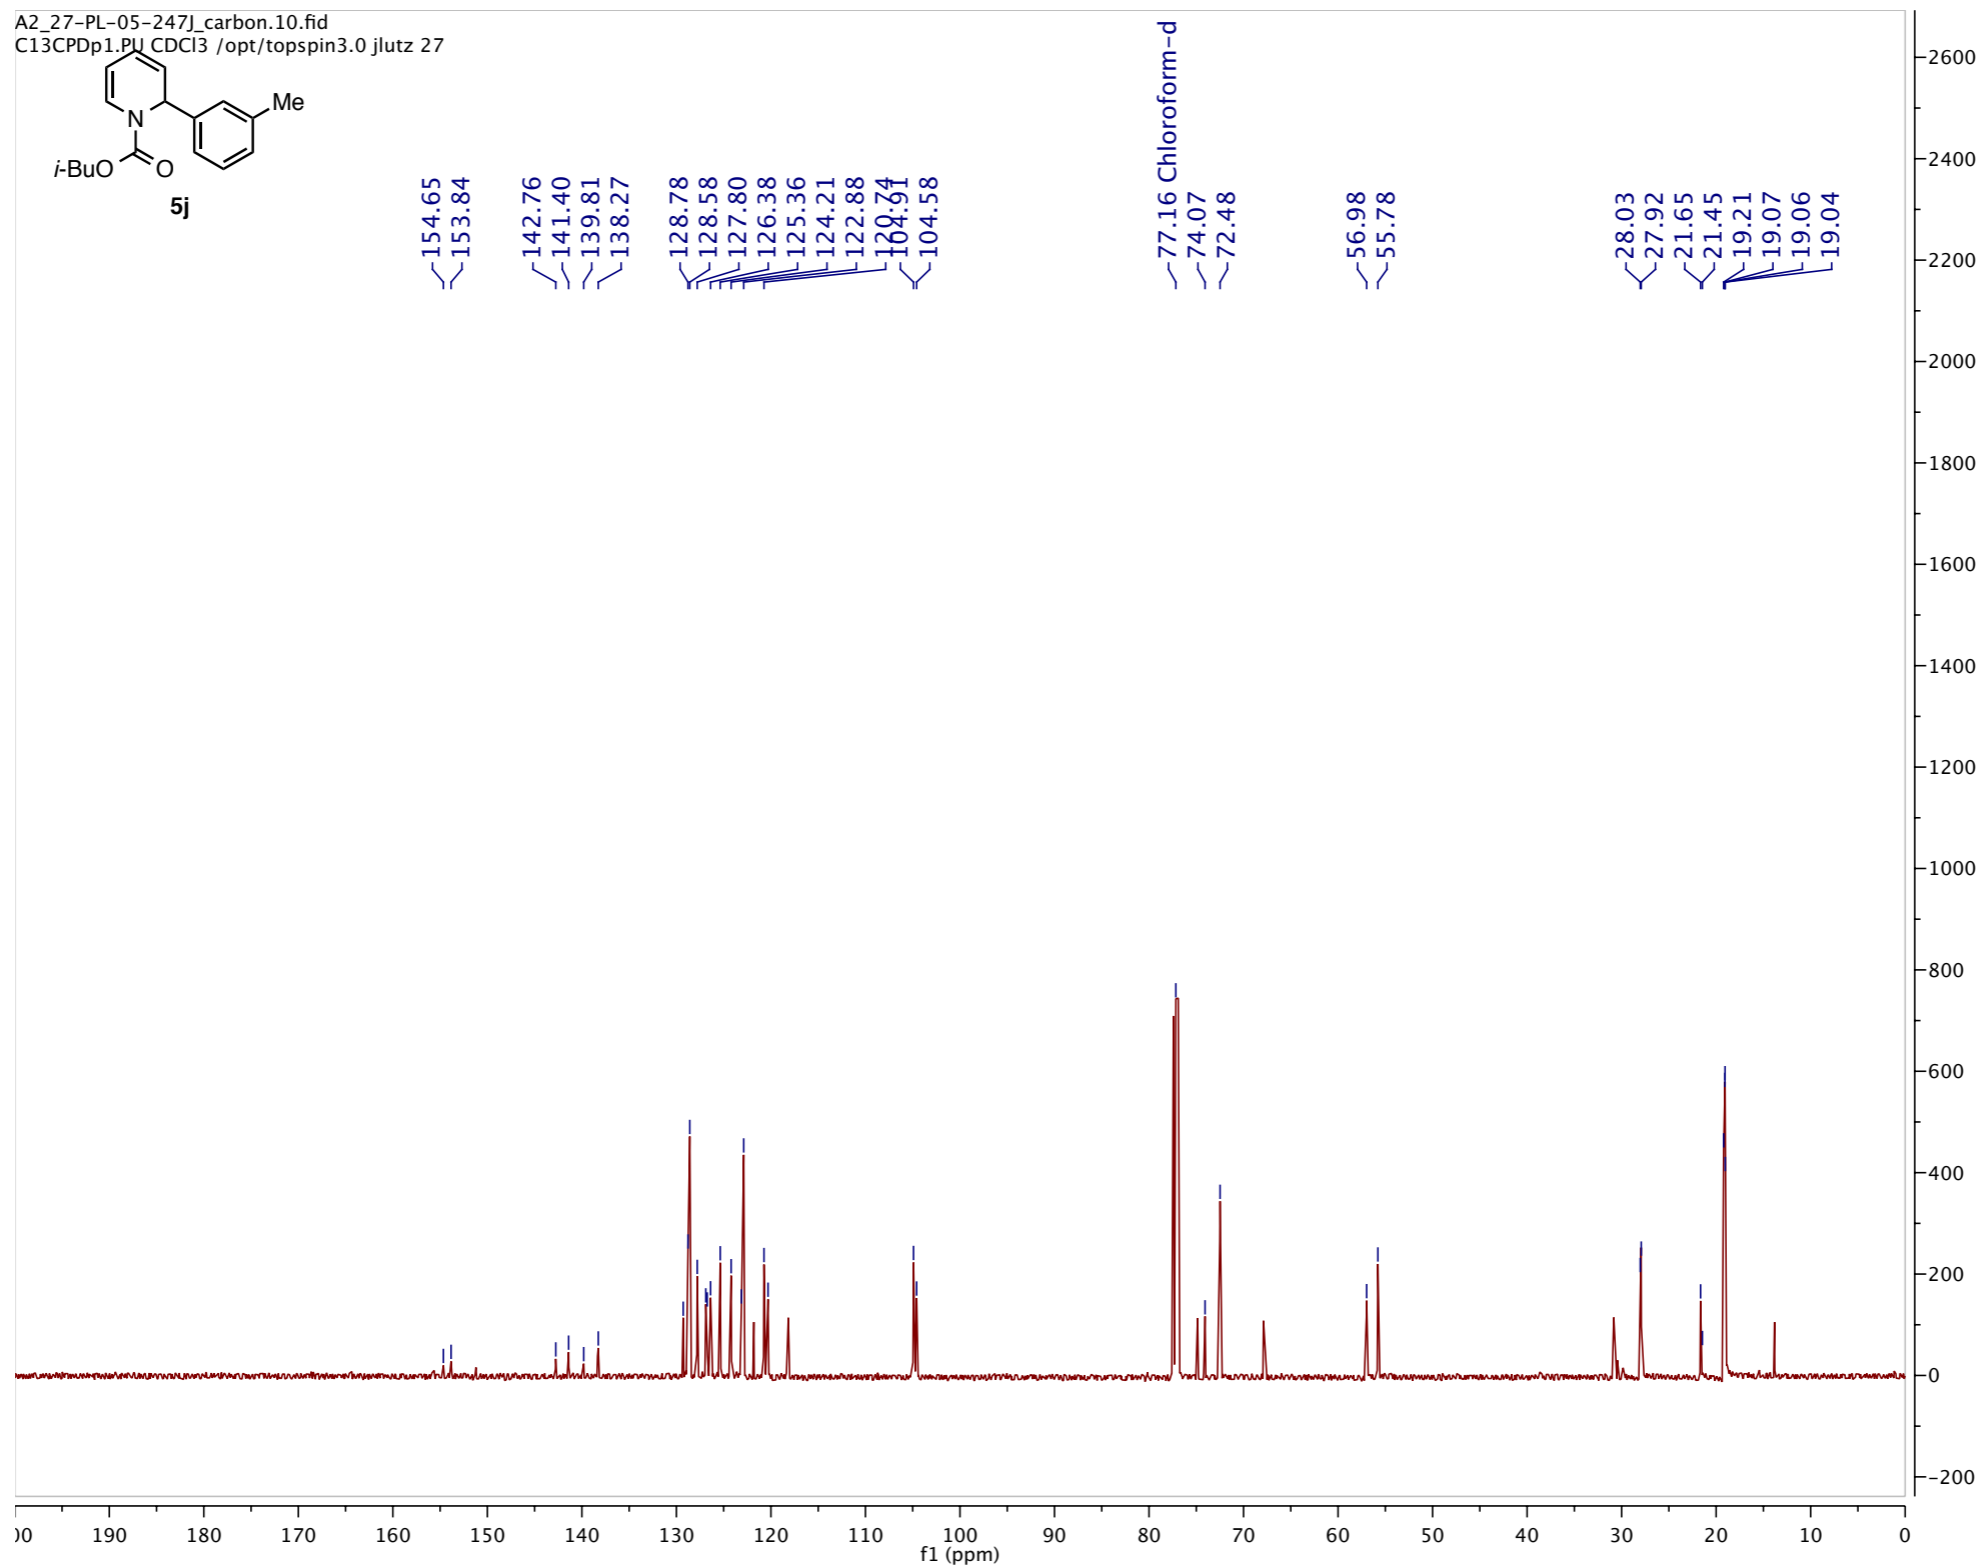

NB3\_PL-03-167.10.fid

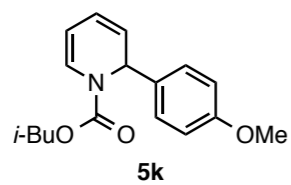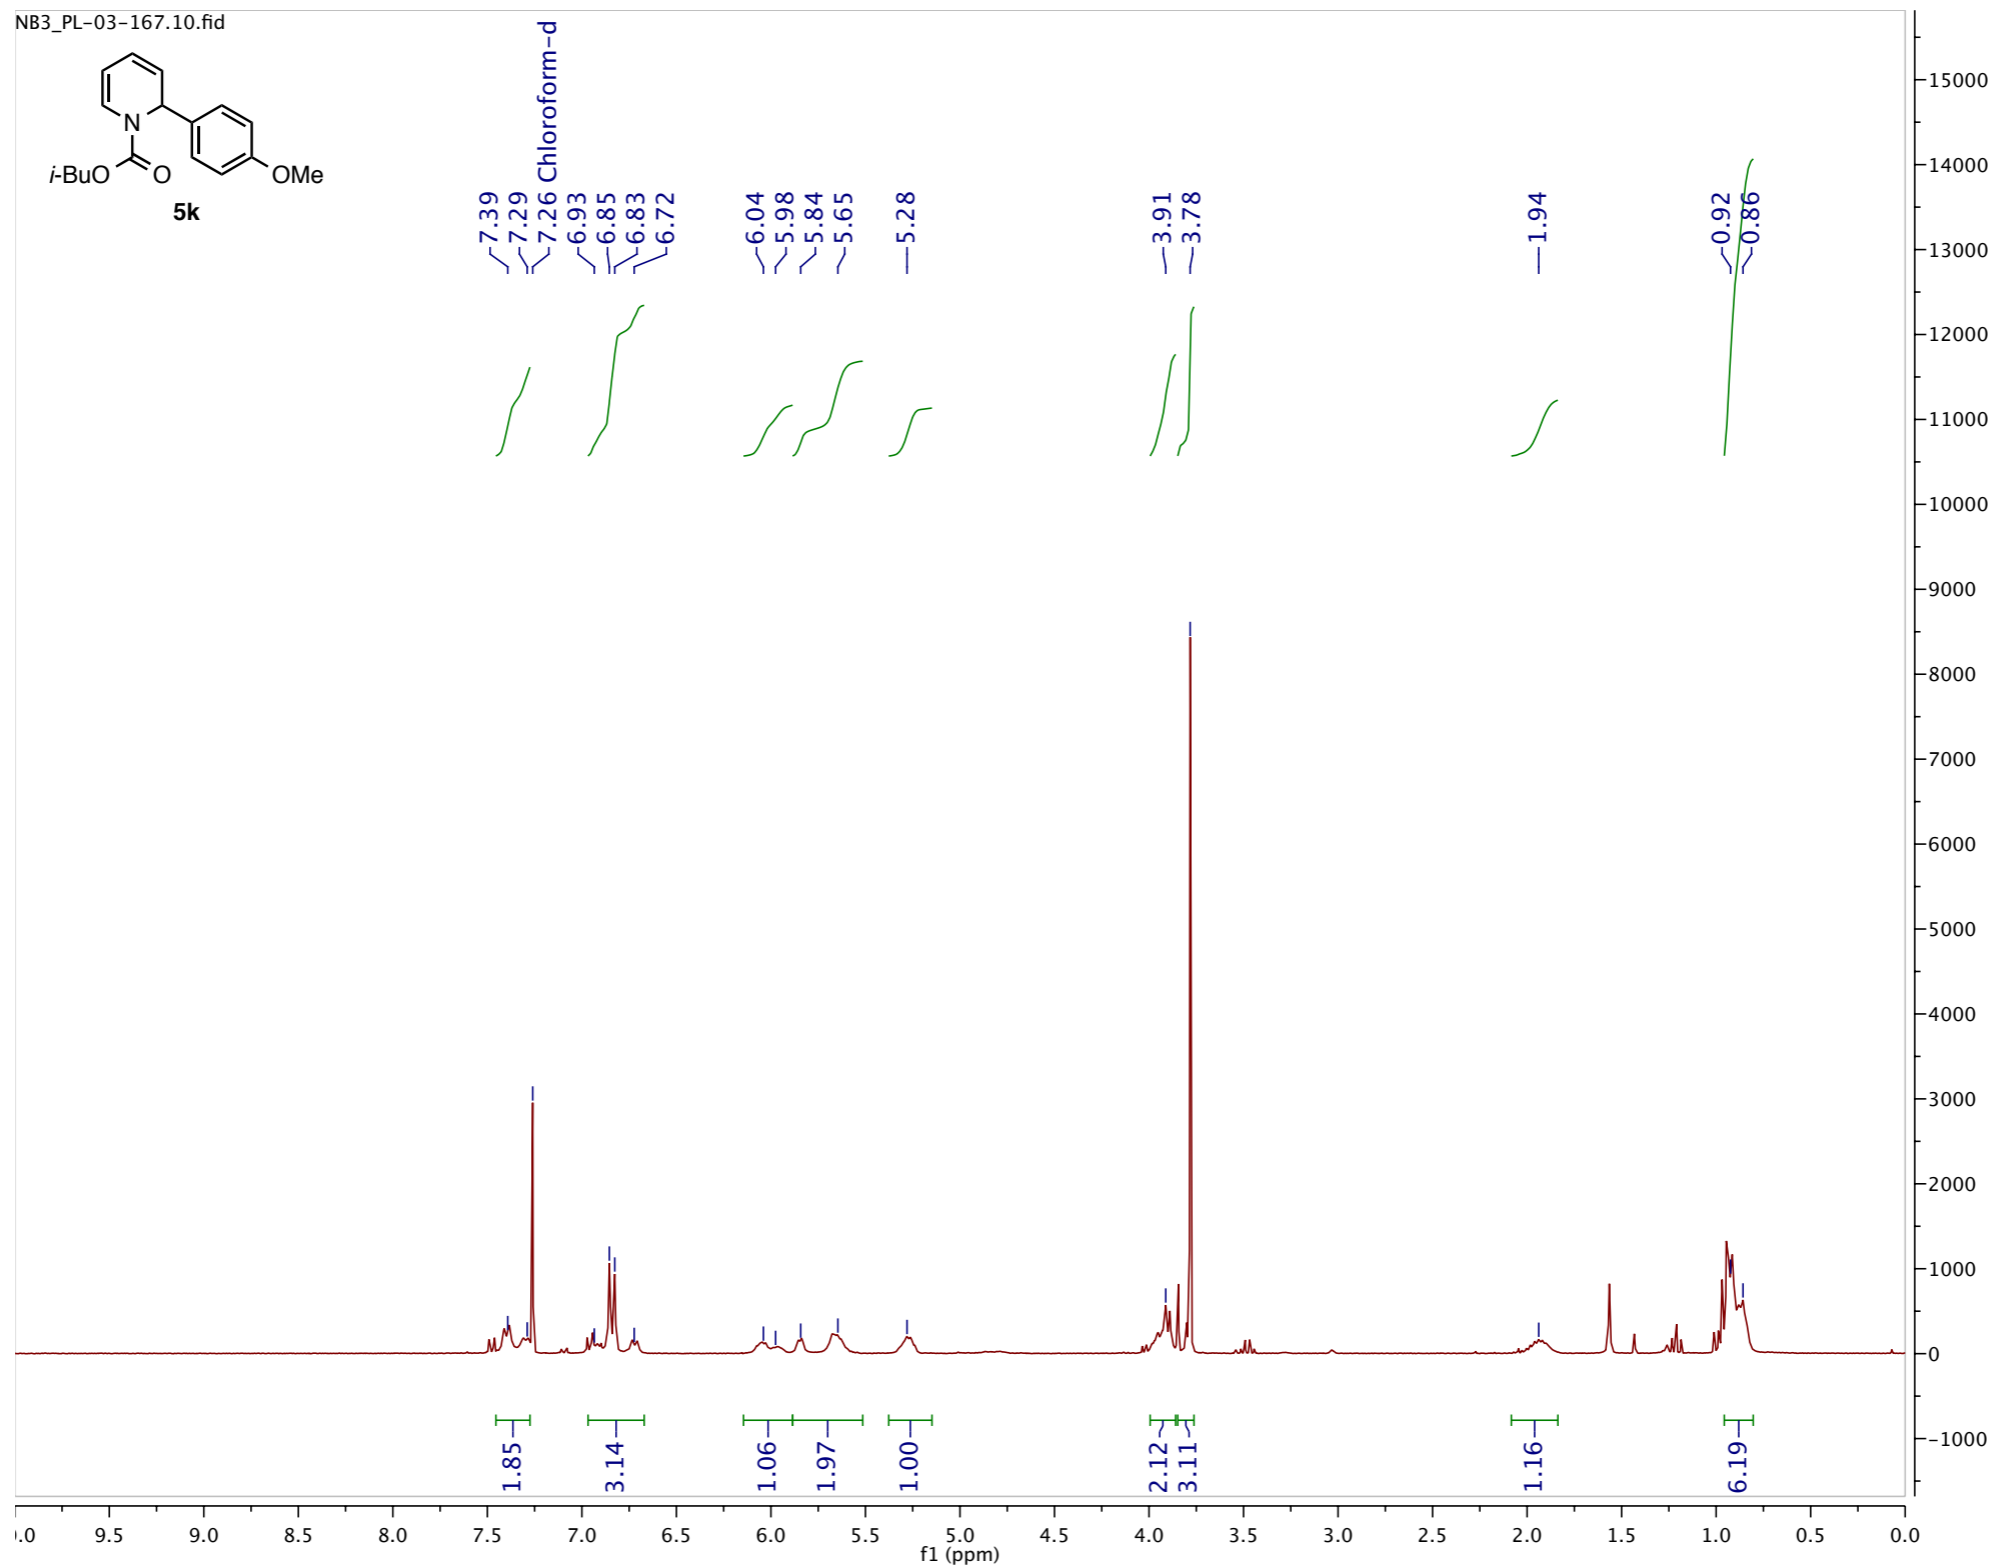

300 MHz <sup>1</sup>H-NMR spectrum of **5k** in CDCl<sub>3</sub>

A2\_28-PL-05-247K\_carbon.10.fid  
C13CPDp1.PU CDCl3 /opt/topspin3.0 jlutz 28

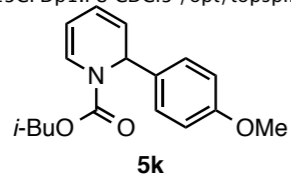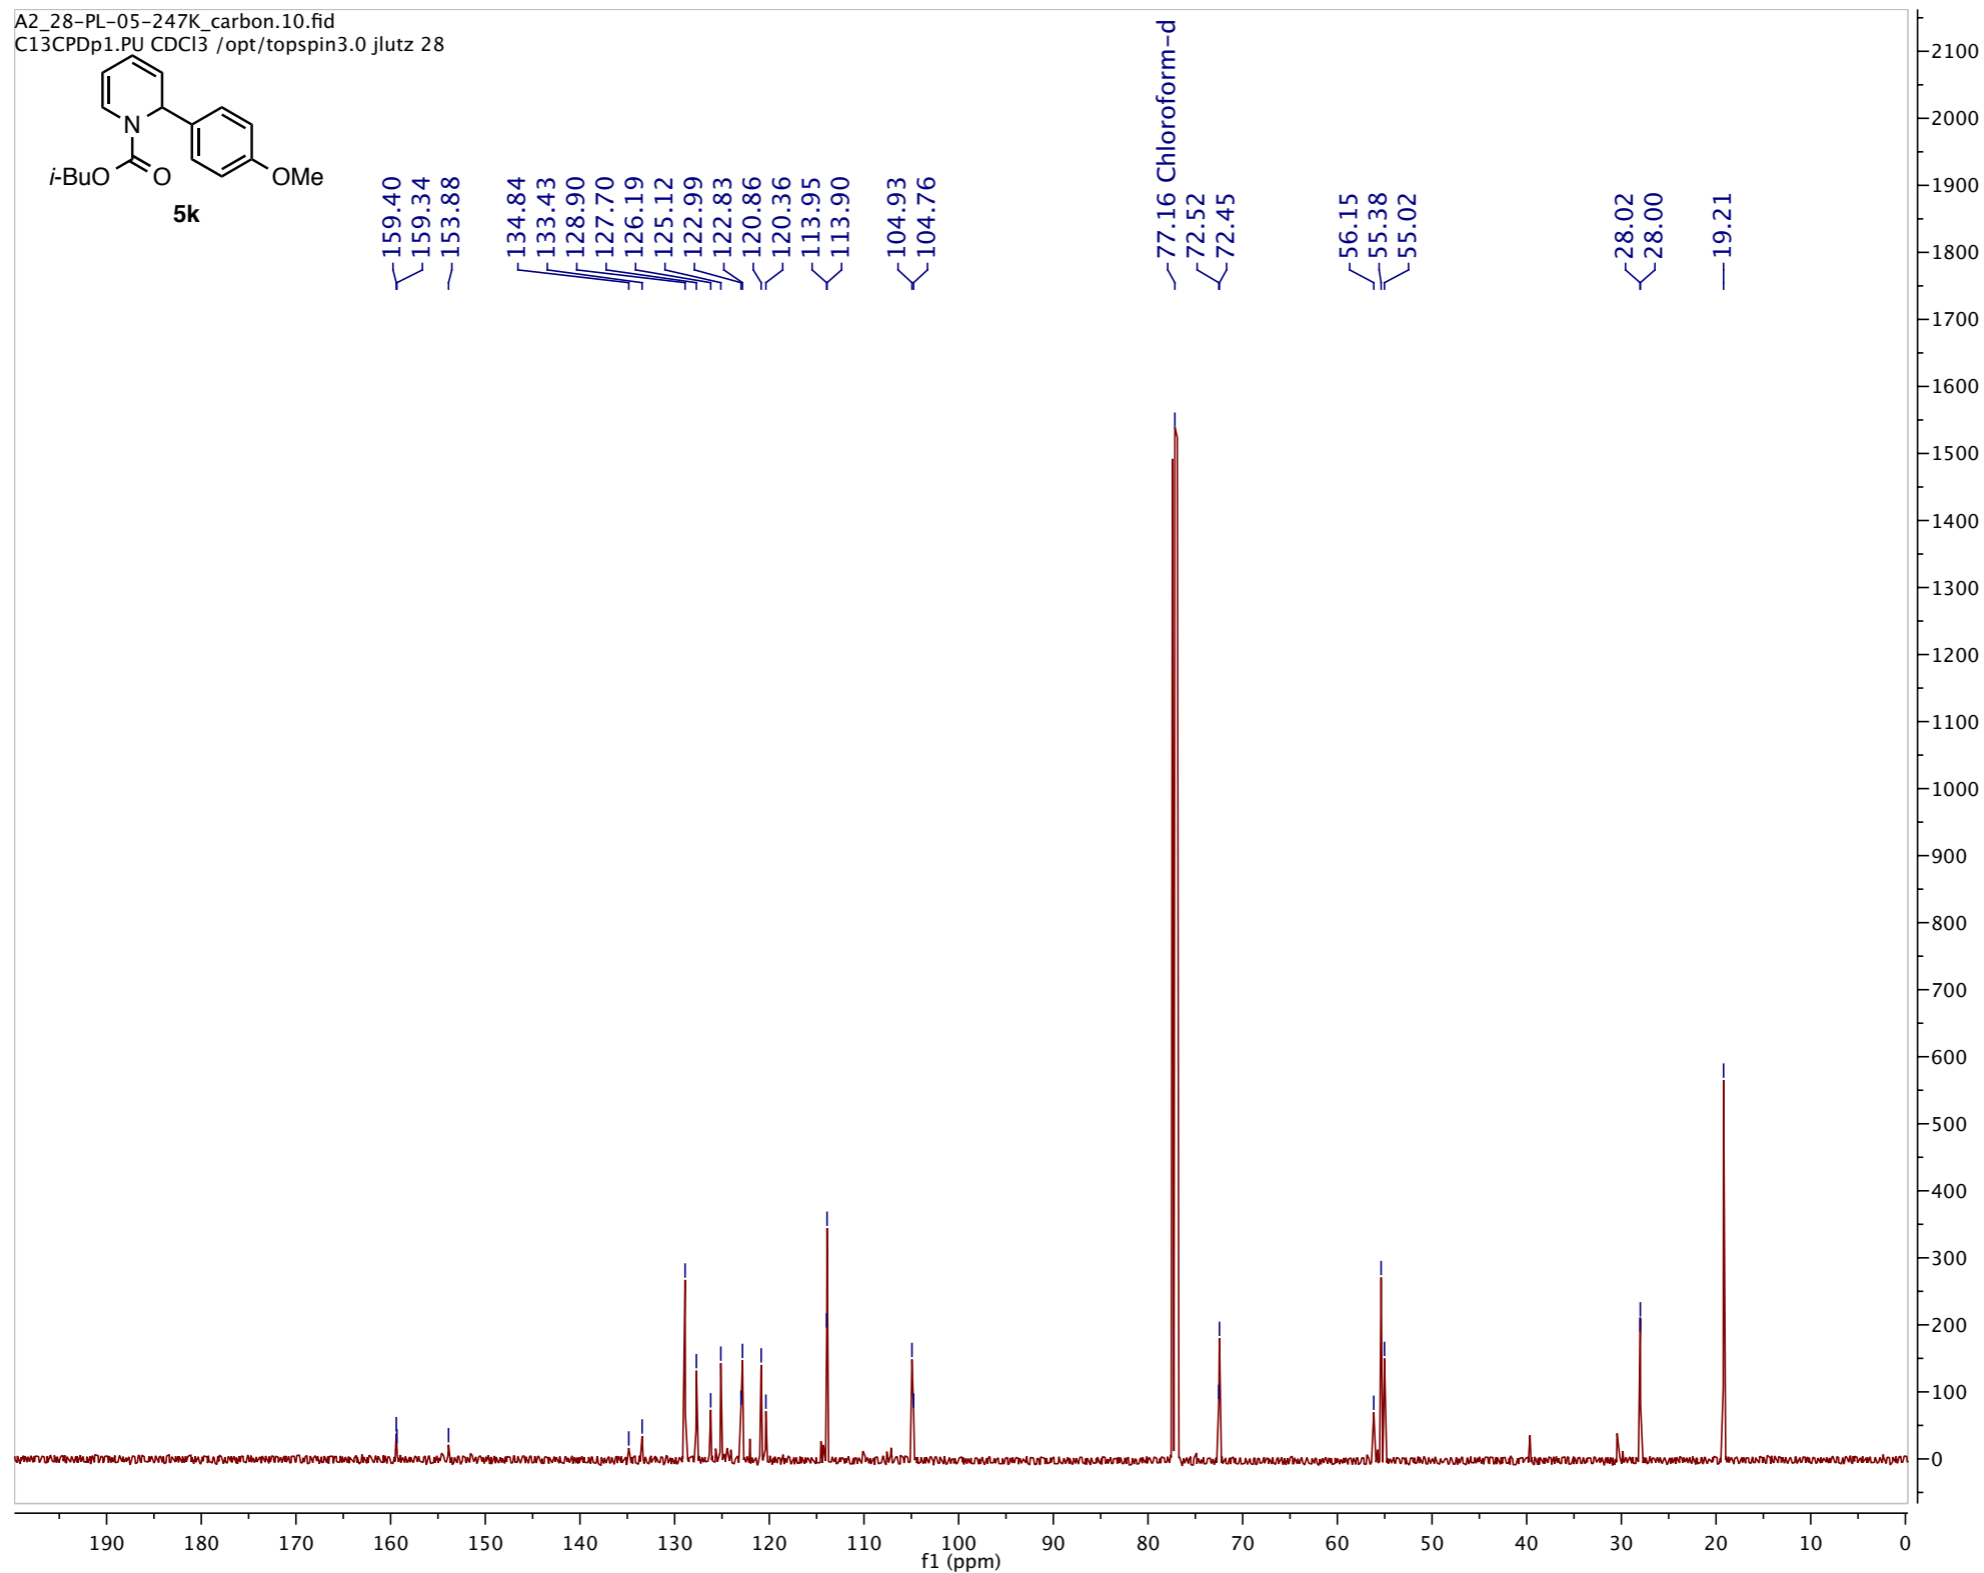

125 MHz <sup>13</sup>C-NMR spectrum of **5k** in CDCl<sub>3</sub>

NB3\_PL-03-188.10.fid

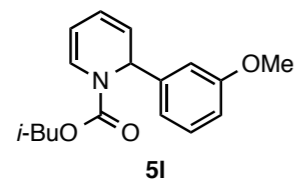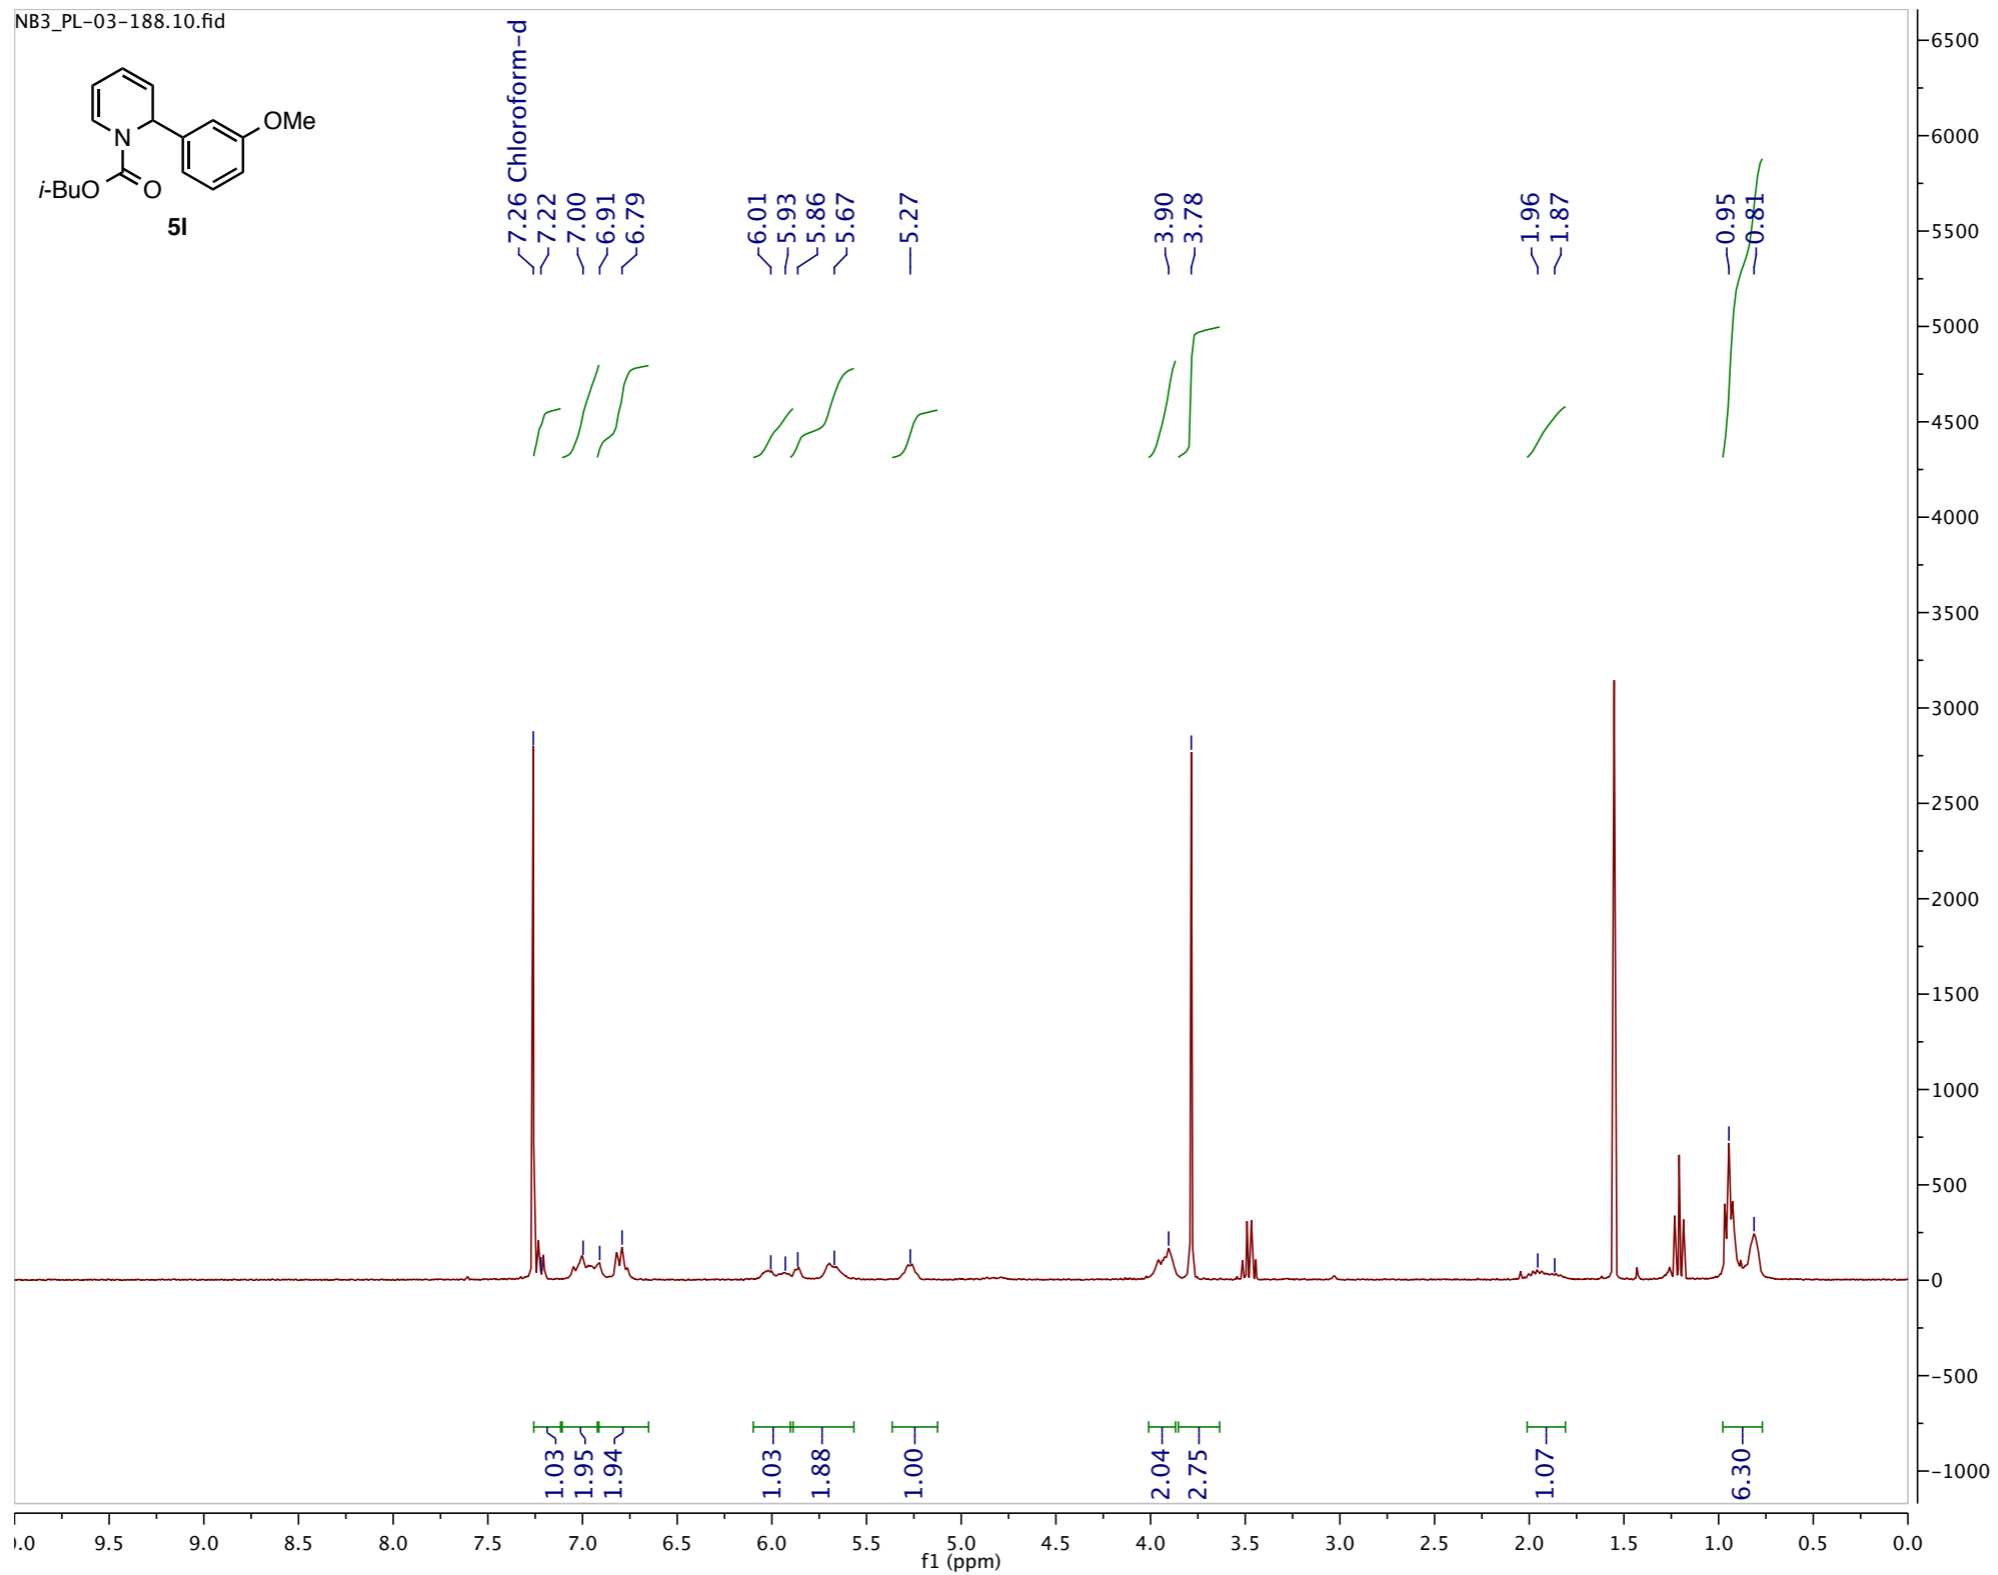



A2\_29-PL-05-247L\_carbon.10.fid  
C13CPDp1.PU CDCl3 /opt/topspin3.0 jlutz 29

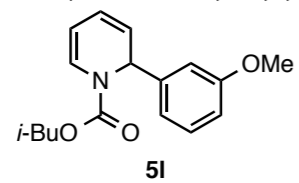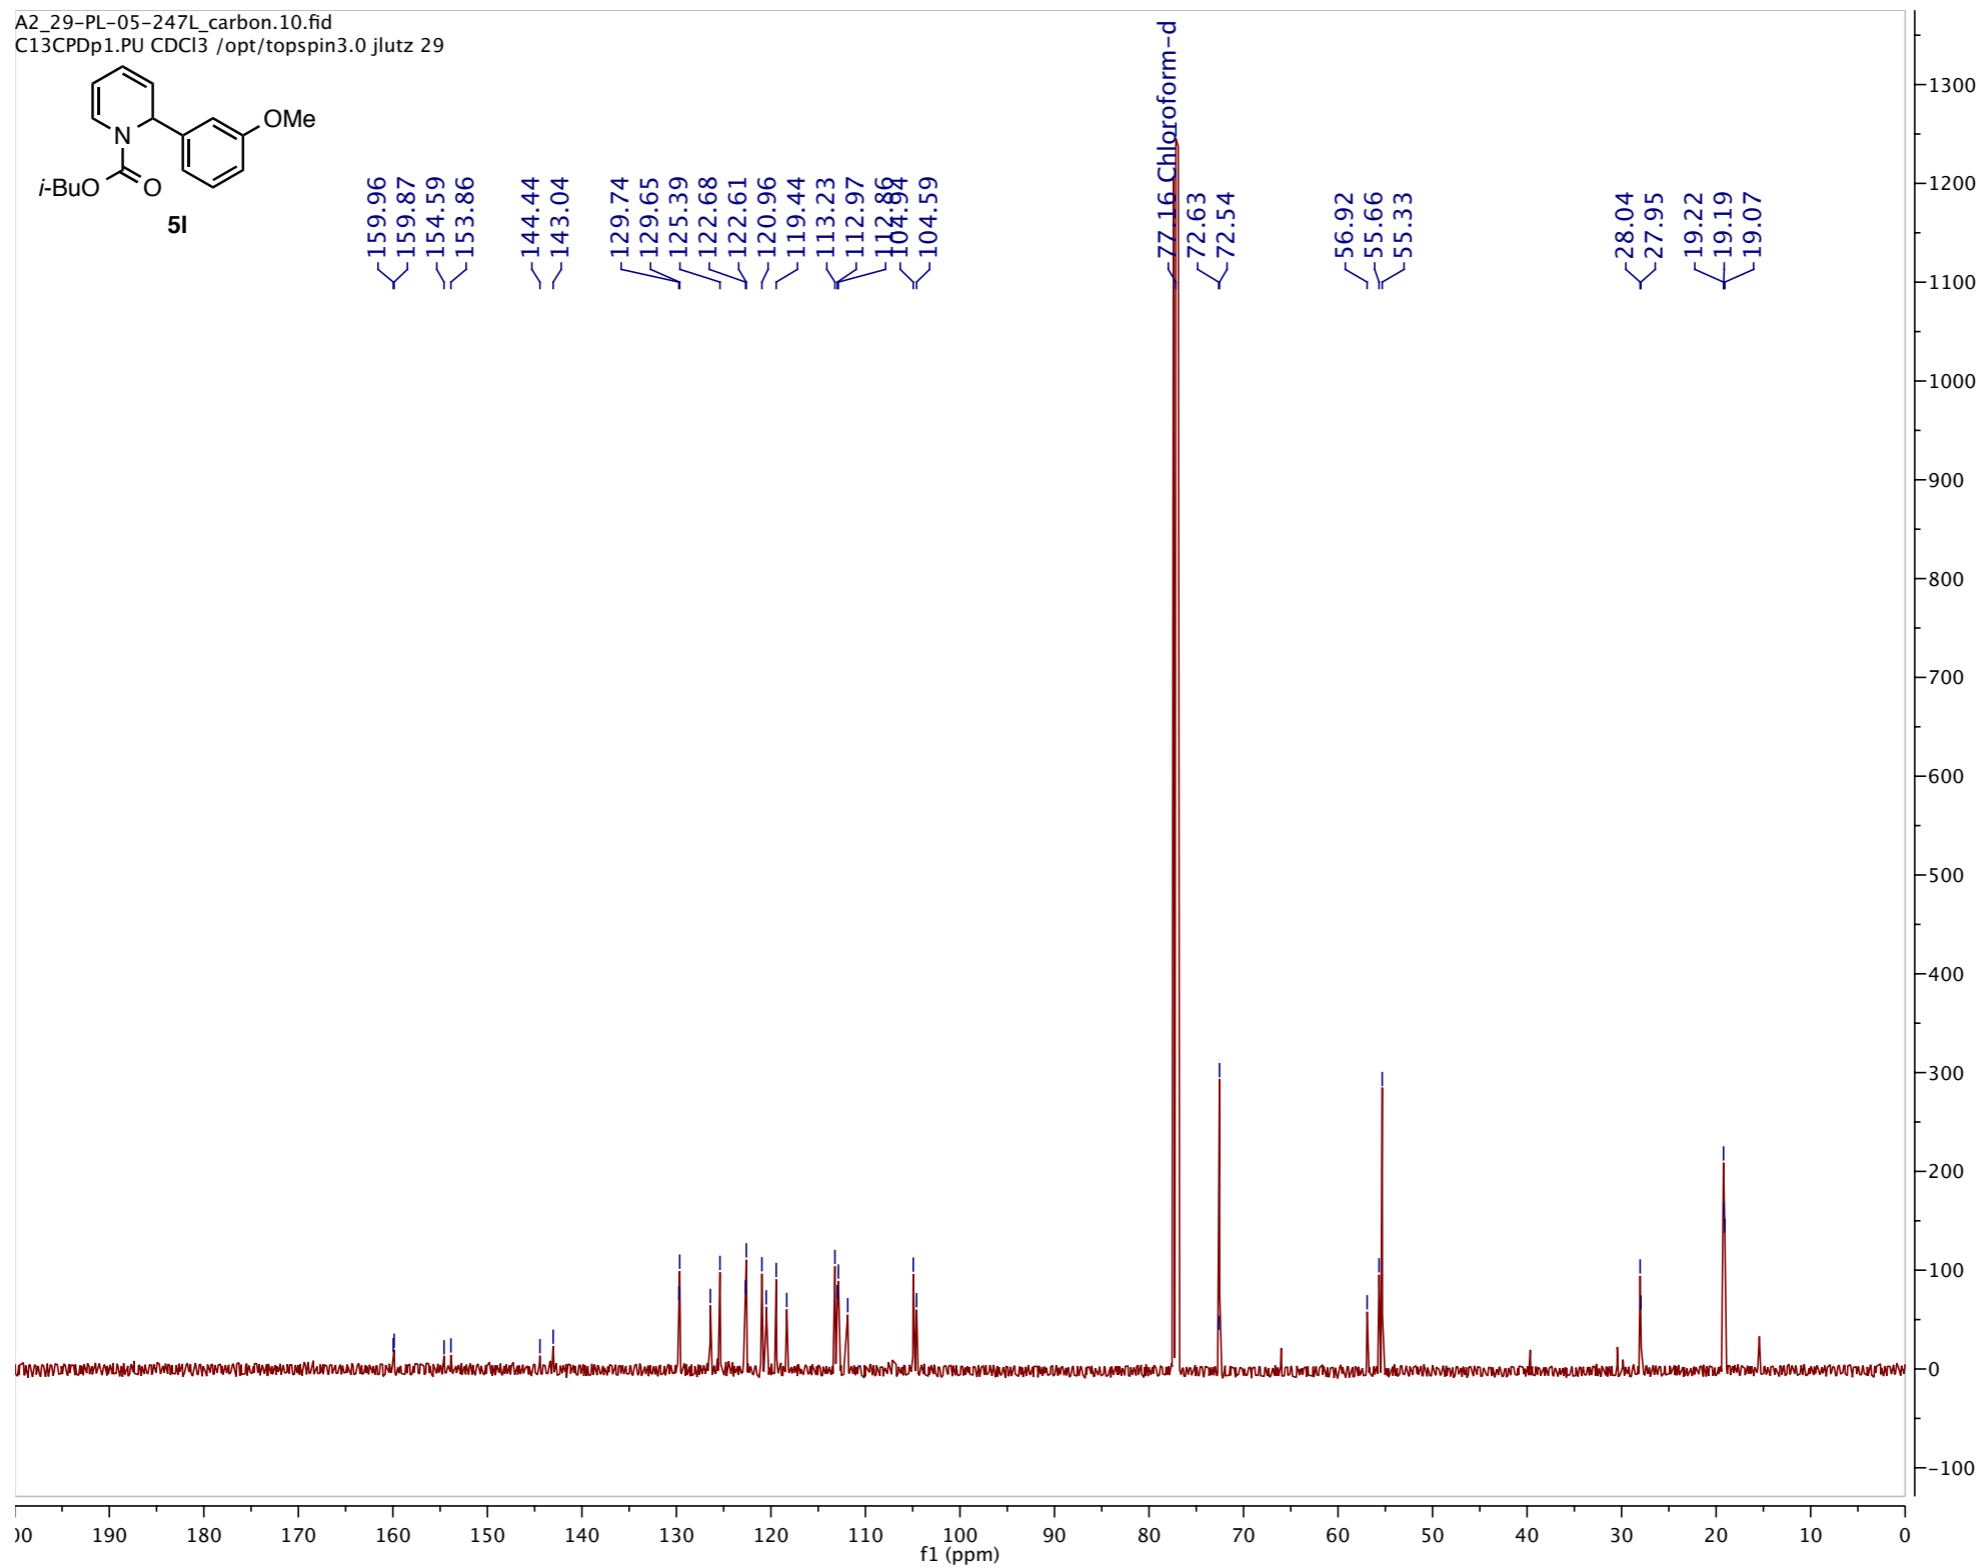

125 MHz <sup>13</sup>C-NMR spectrum of **5I** in CDCl<sub>3</sub>

A2\_49-PL-05-247M\_proton.10.fid  
PROTON.PU CDCl3 /opt/topspin3.0 jlutz 49

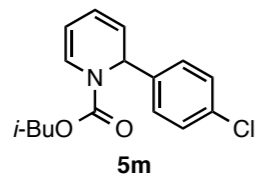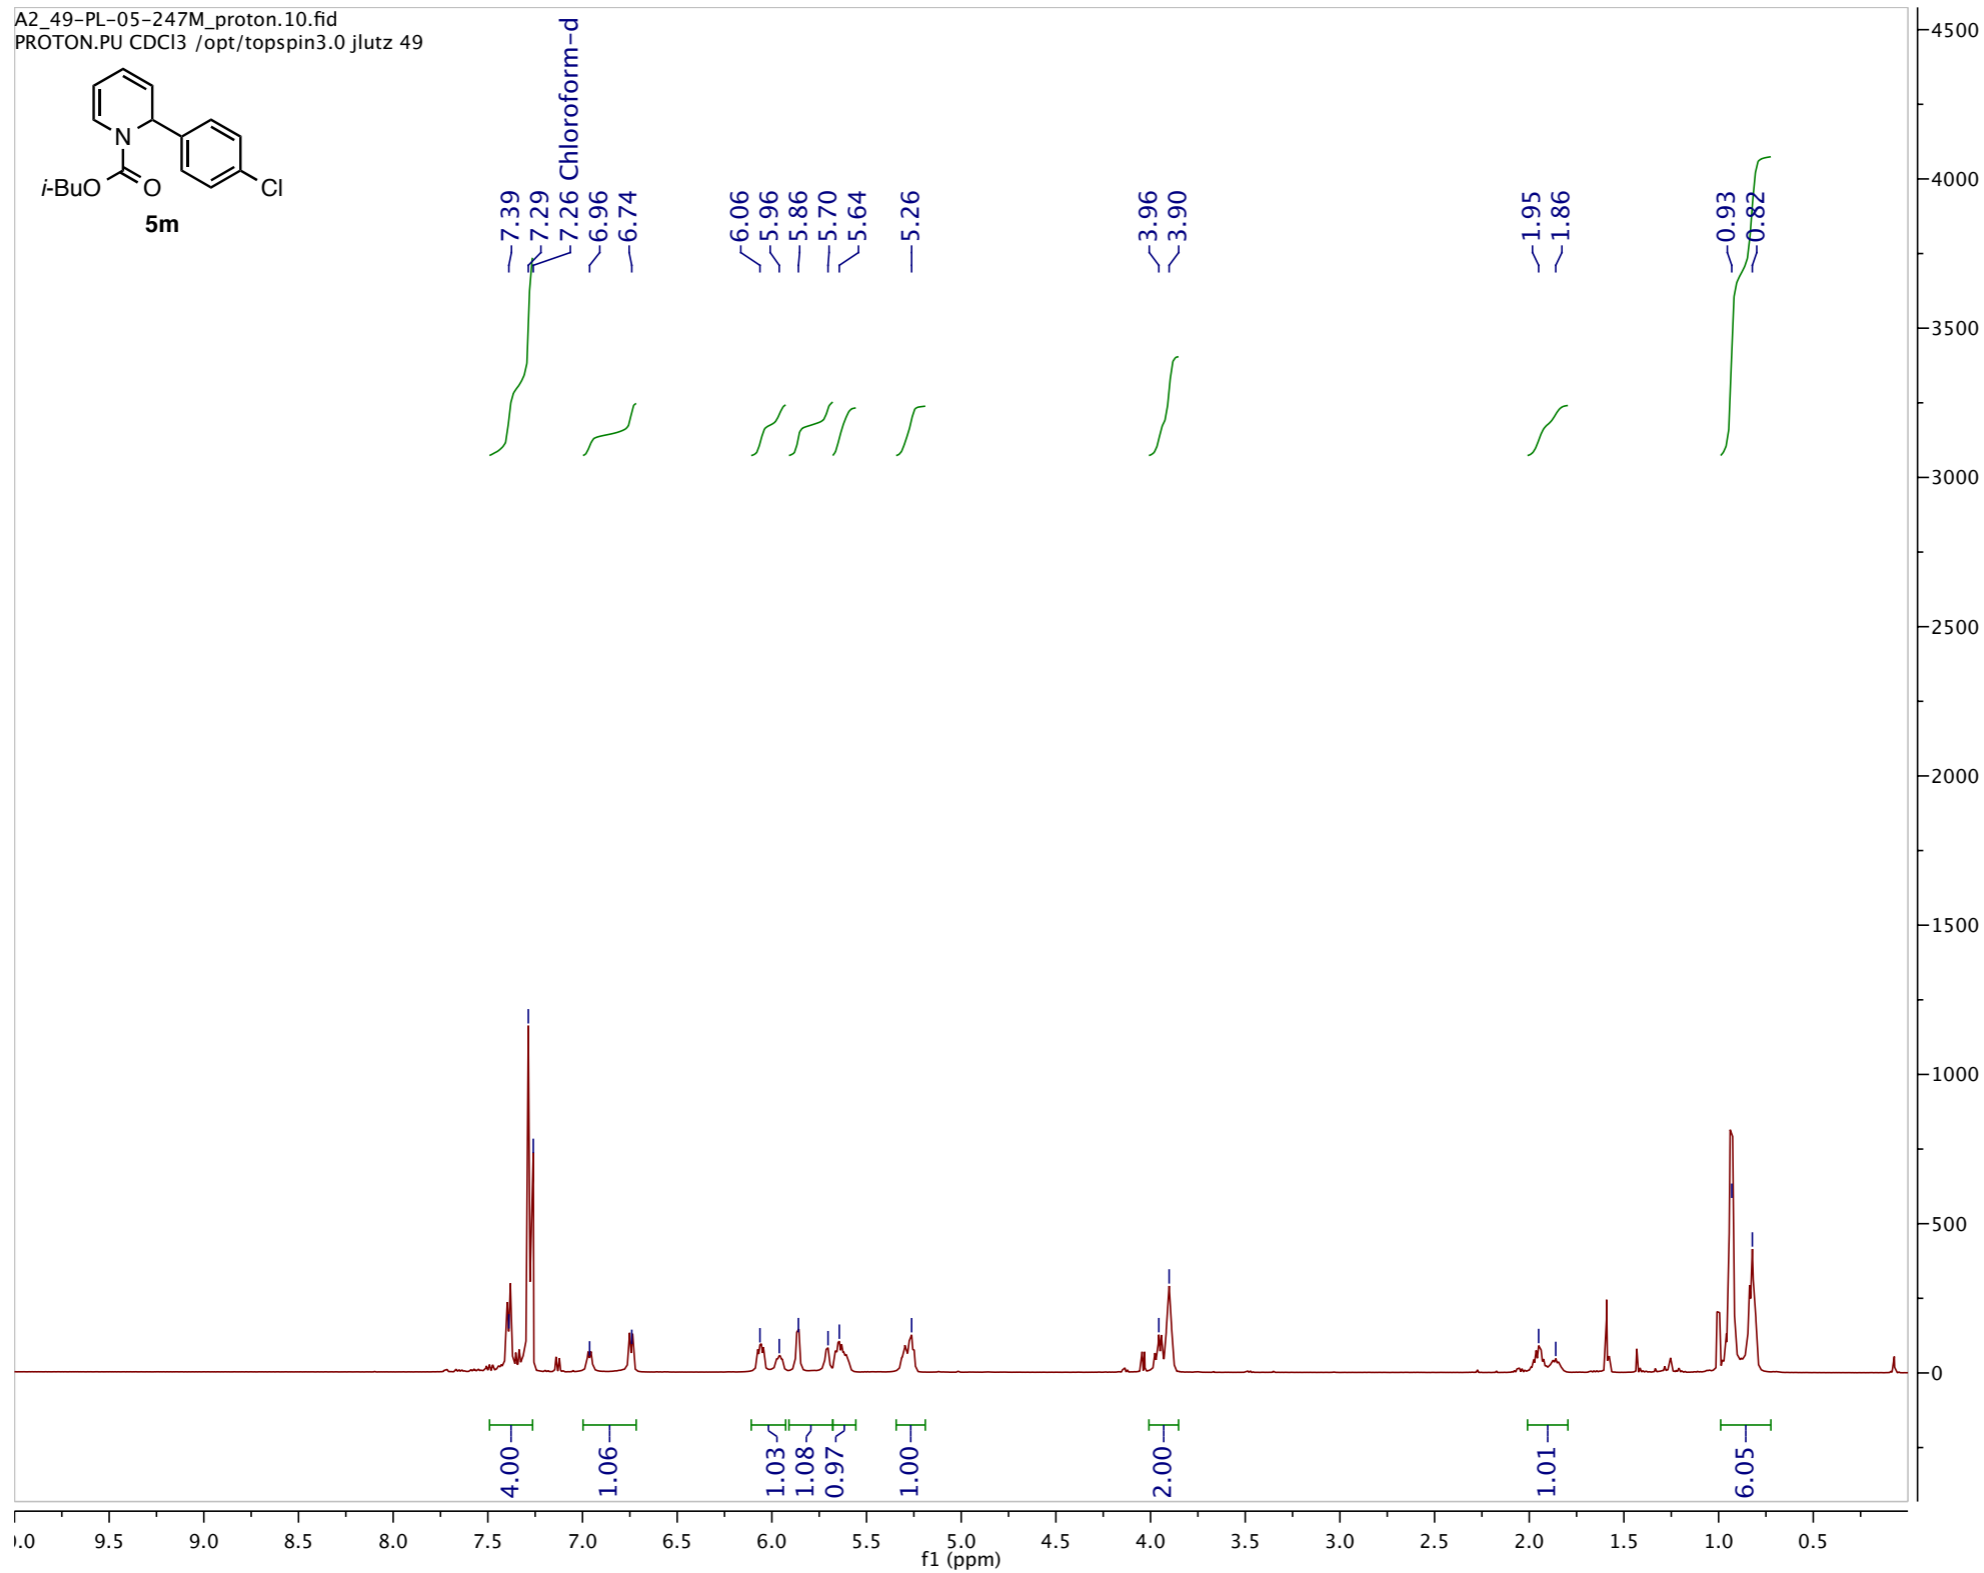

500 MHz <sup>1</sup>H-NMR spectrum of **5m** in CDCl<sub>3</sub>

A2\_49-PL-05-247M\_carbon.10.fid  
C13CPDp1.PU CDCl3 /opt/topspin3.0 jlutz 49

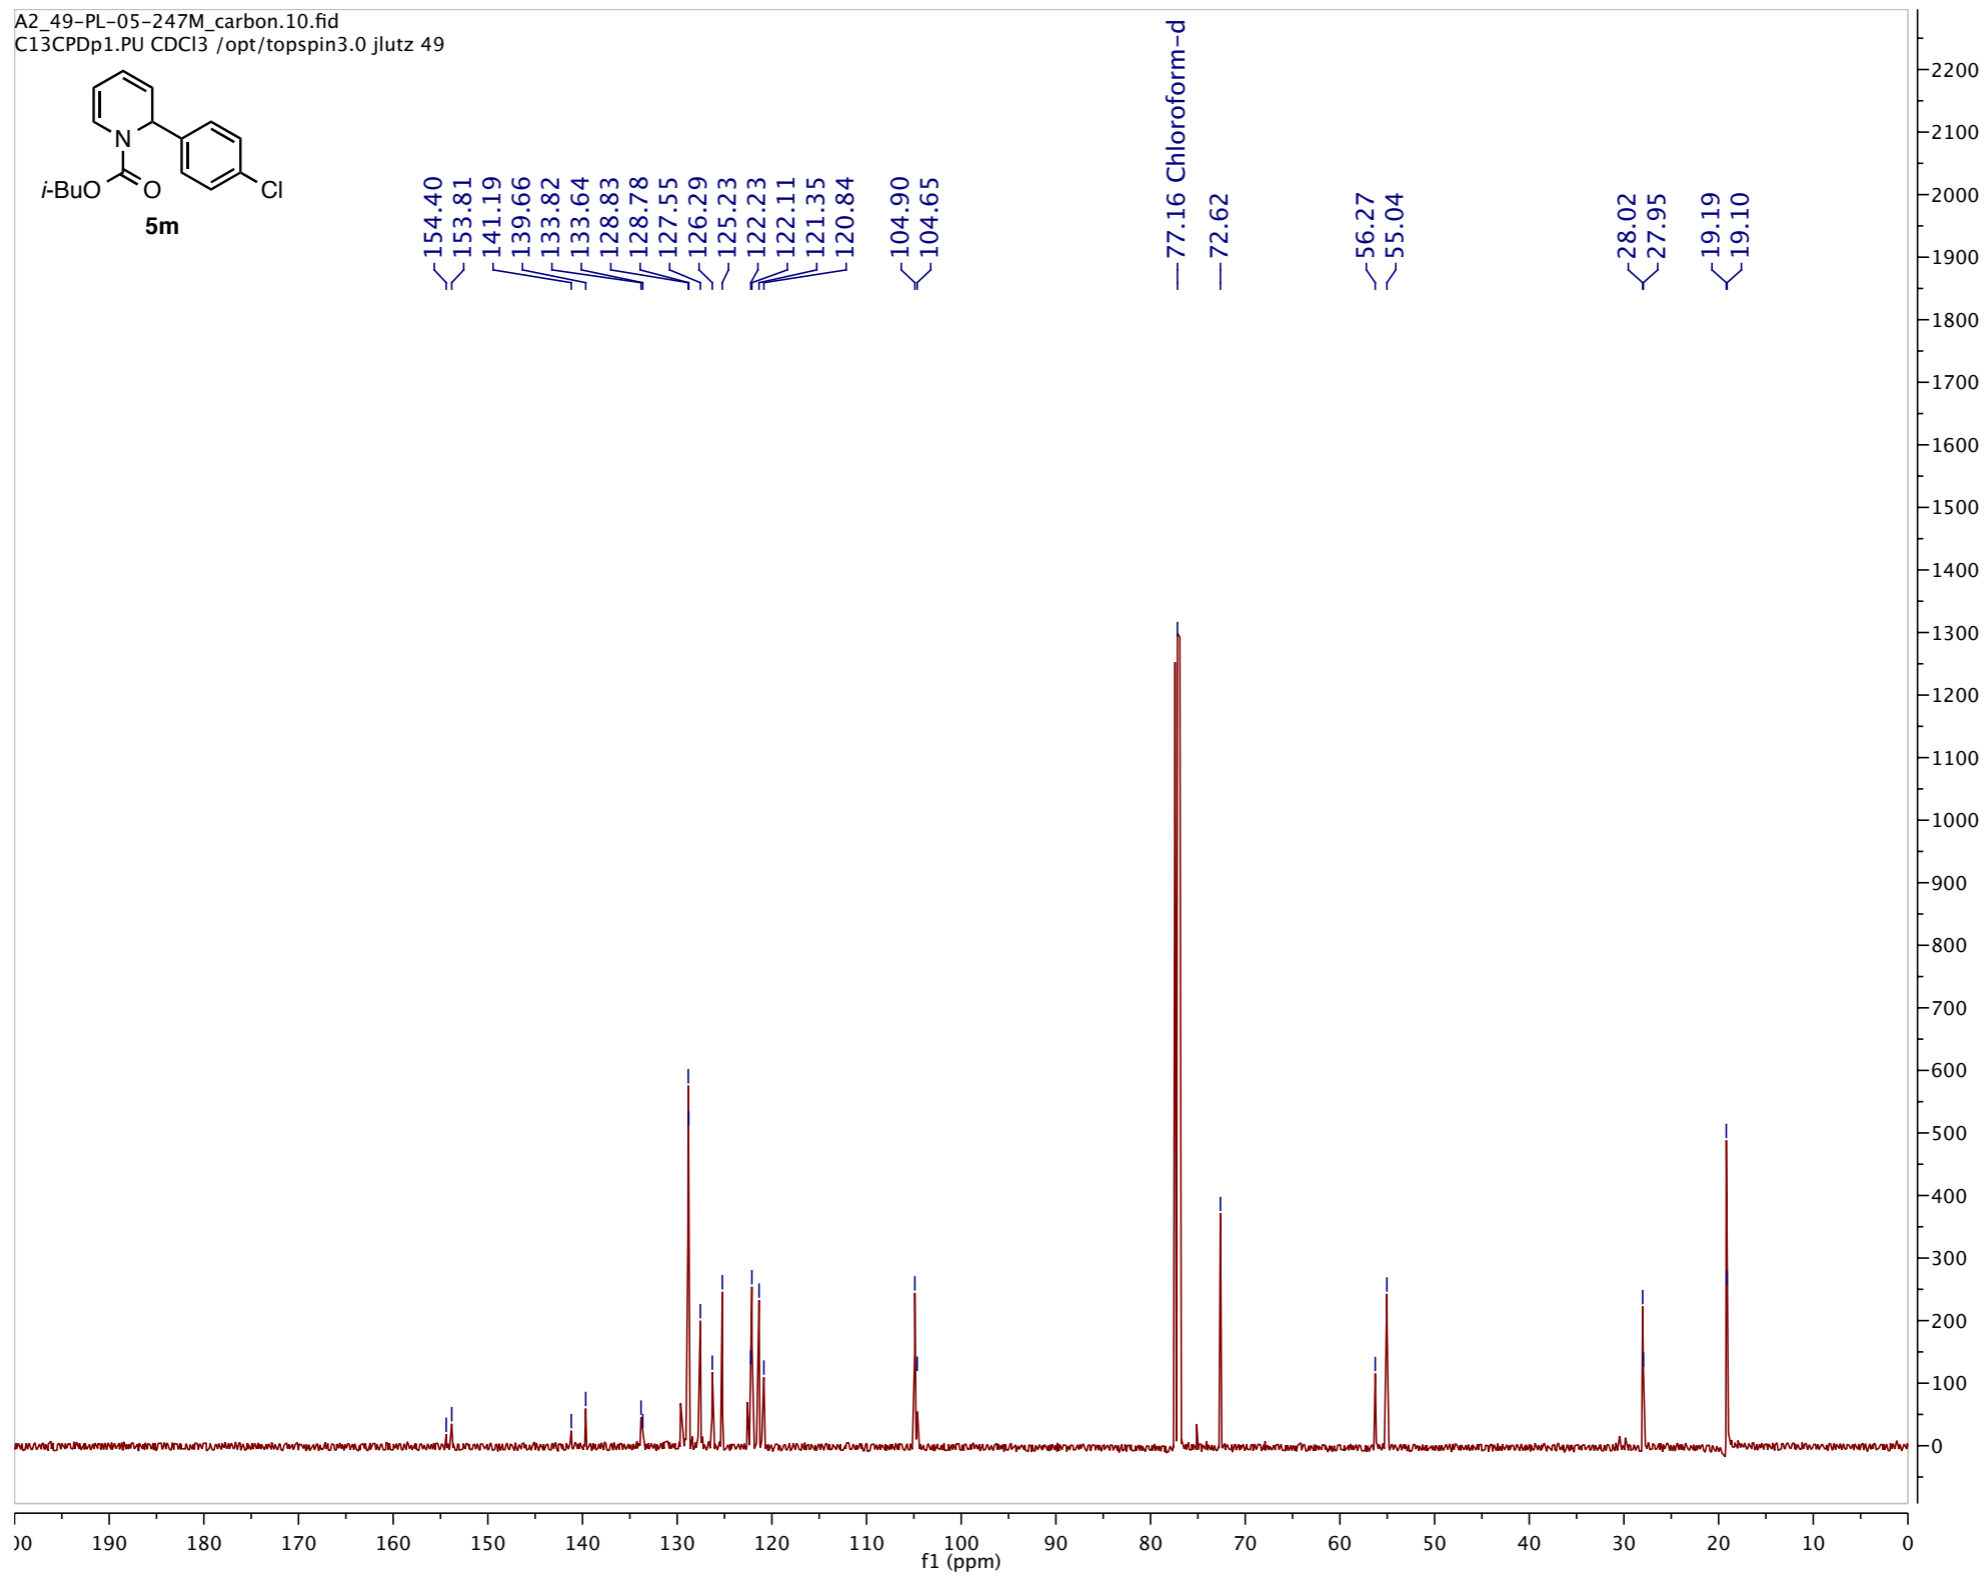

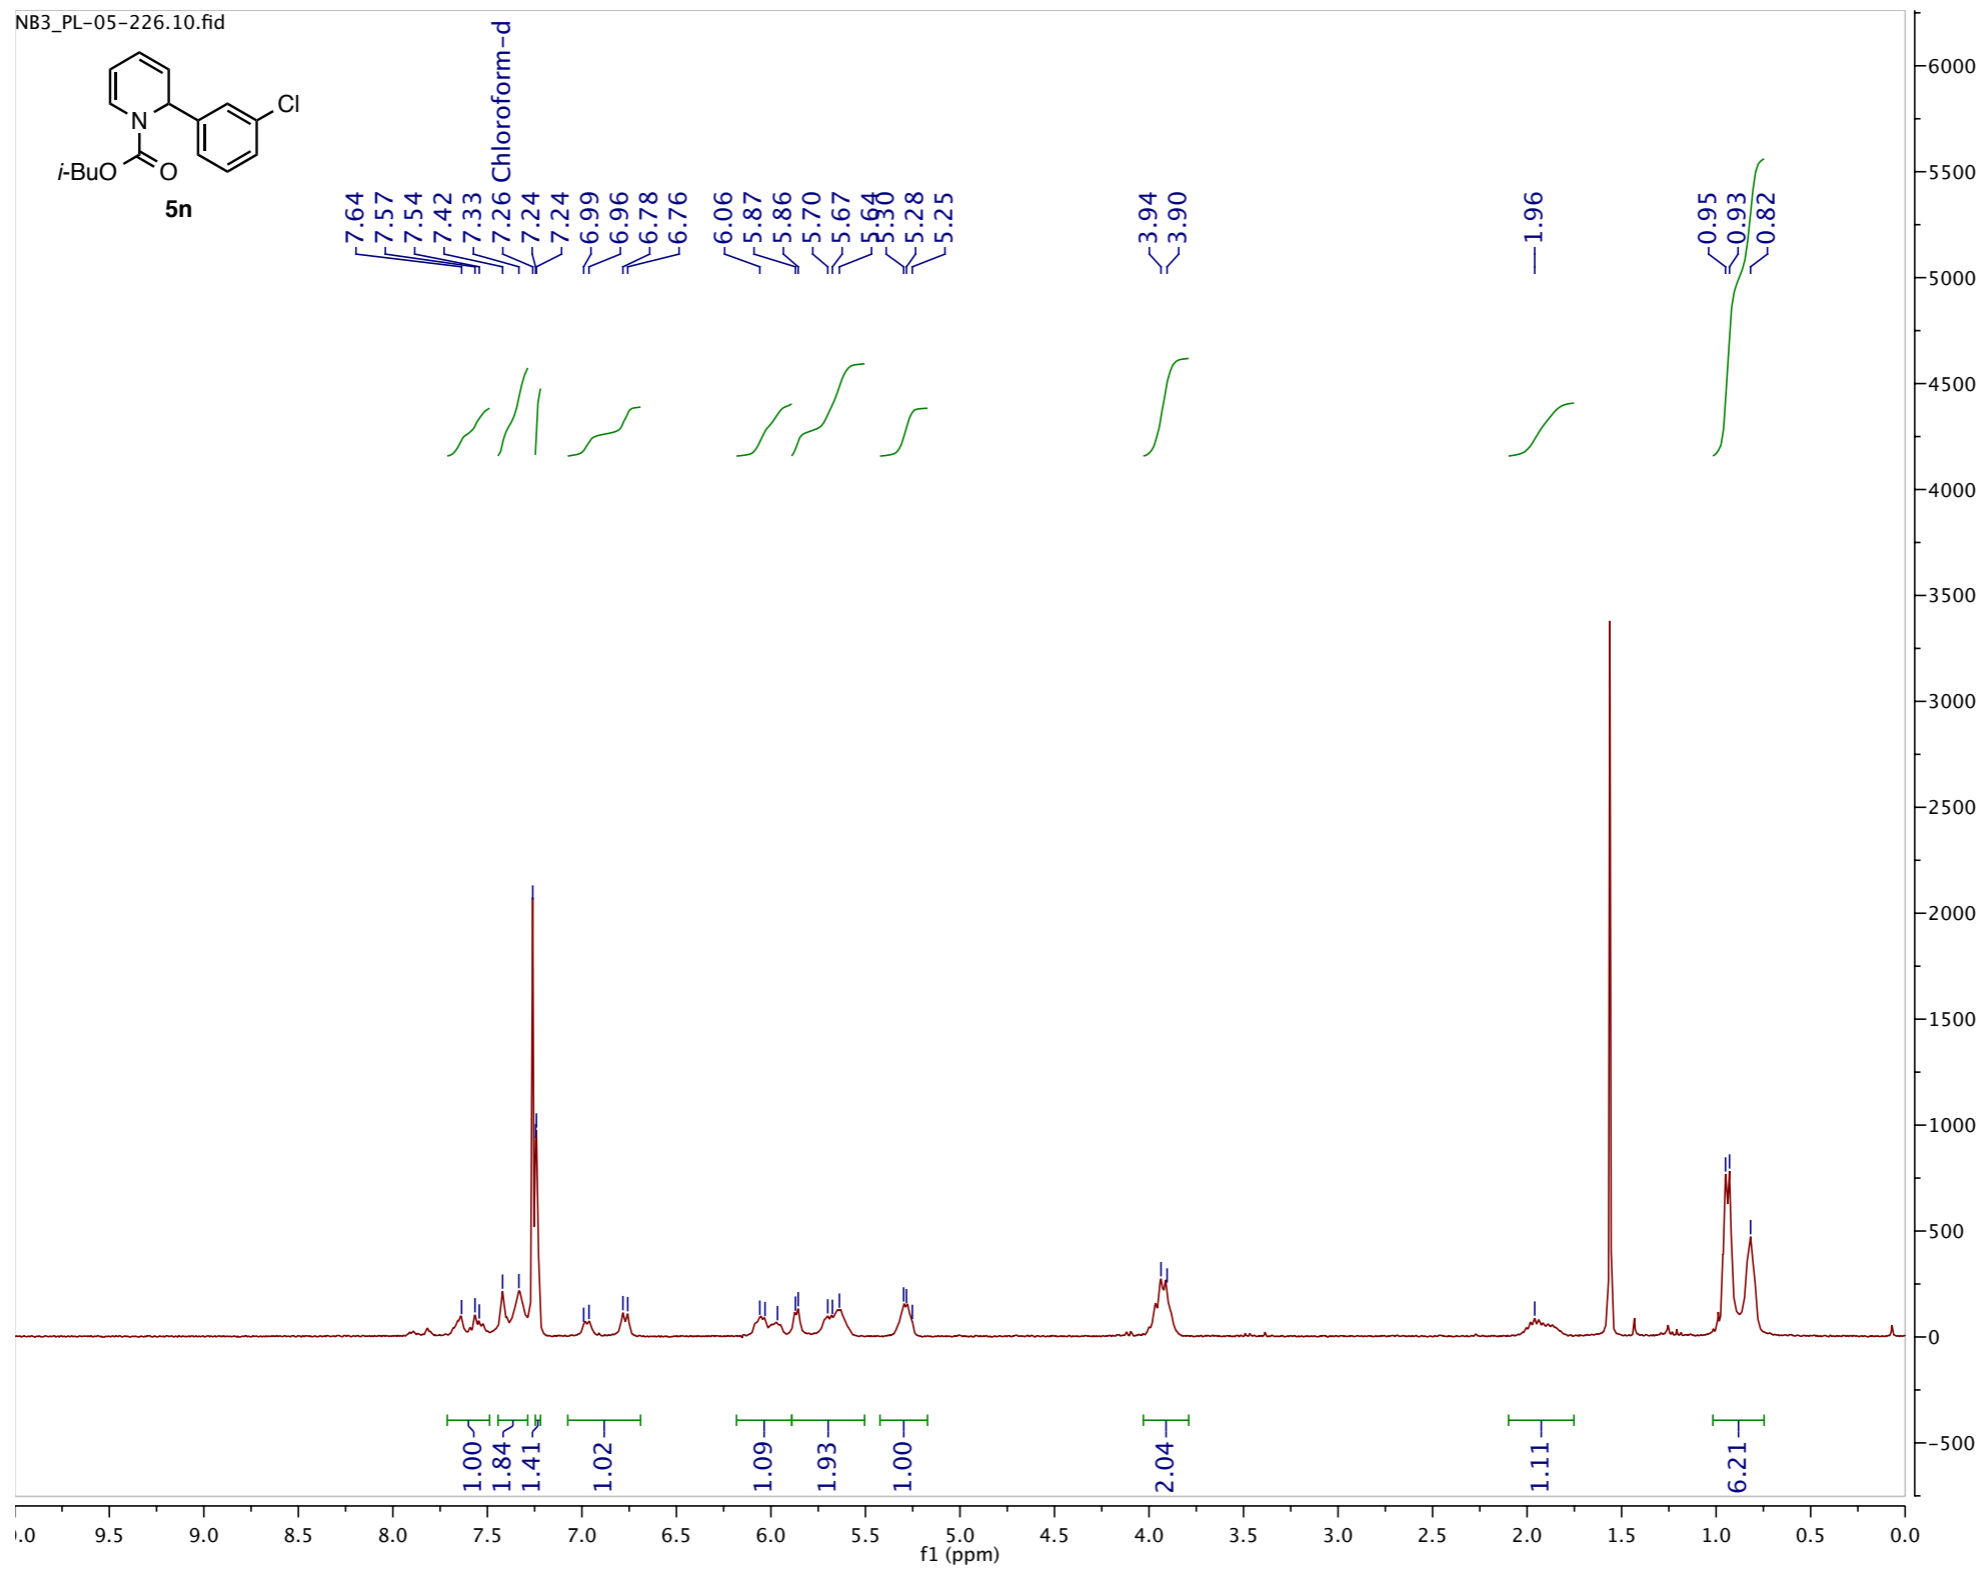

A2\_28-PL-05-247n\_redo\_prep\_carbon.10.fid  
C13CPDp1.PU CDCl3 /opt/topspin3.0 jlutz 28

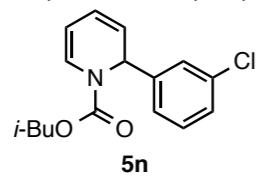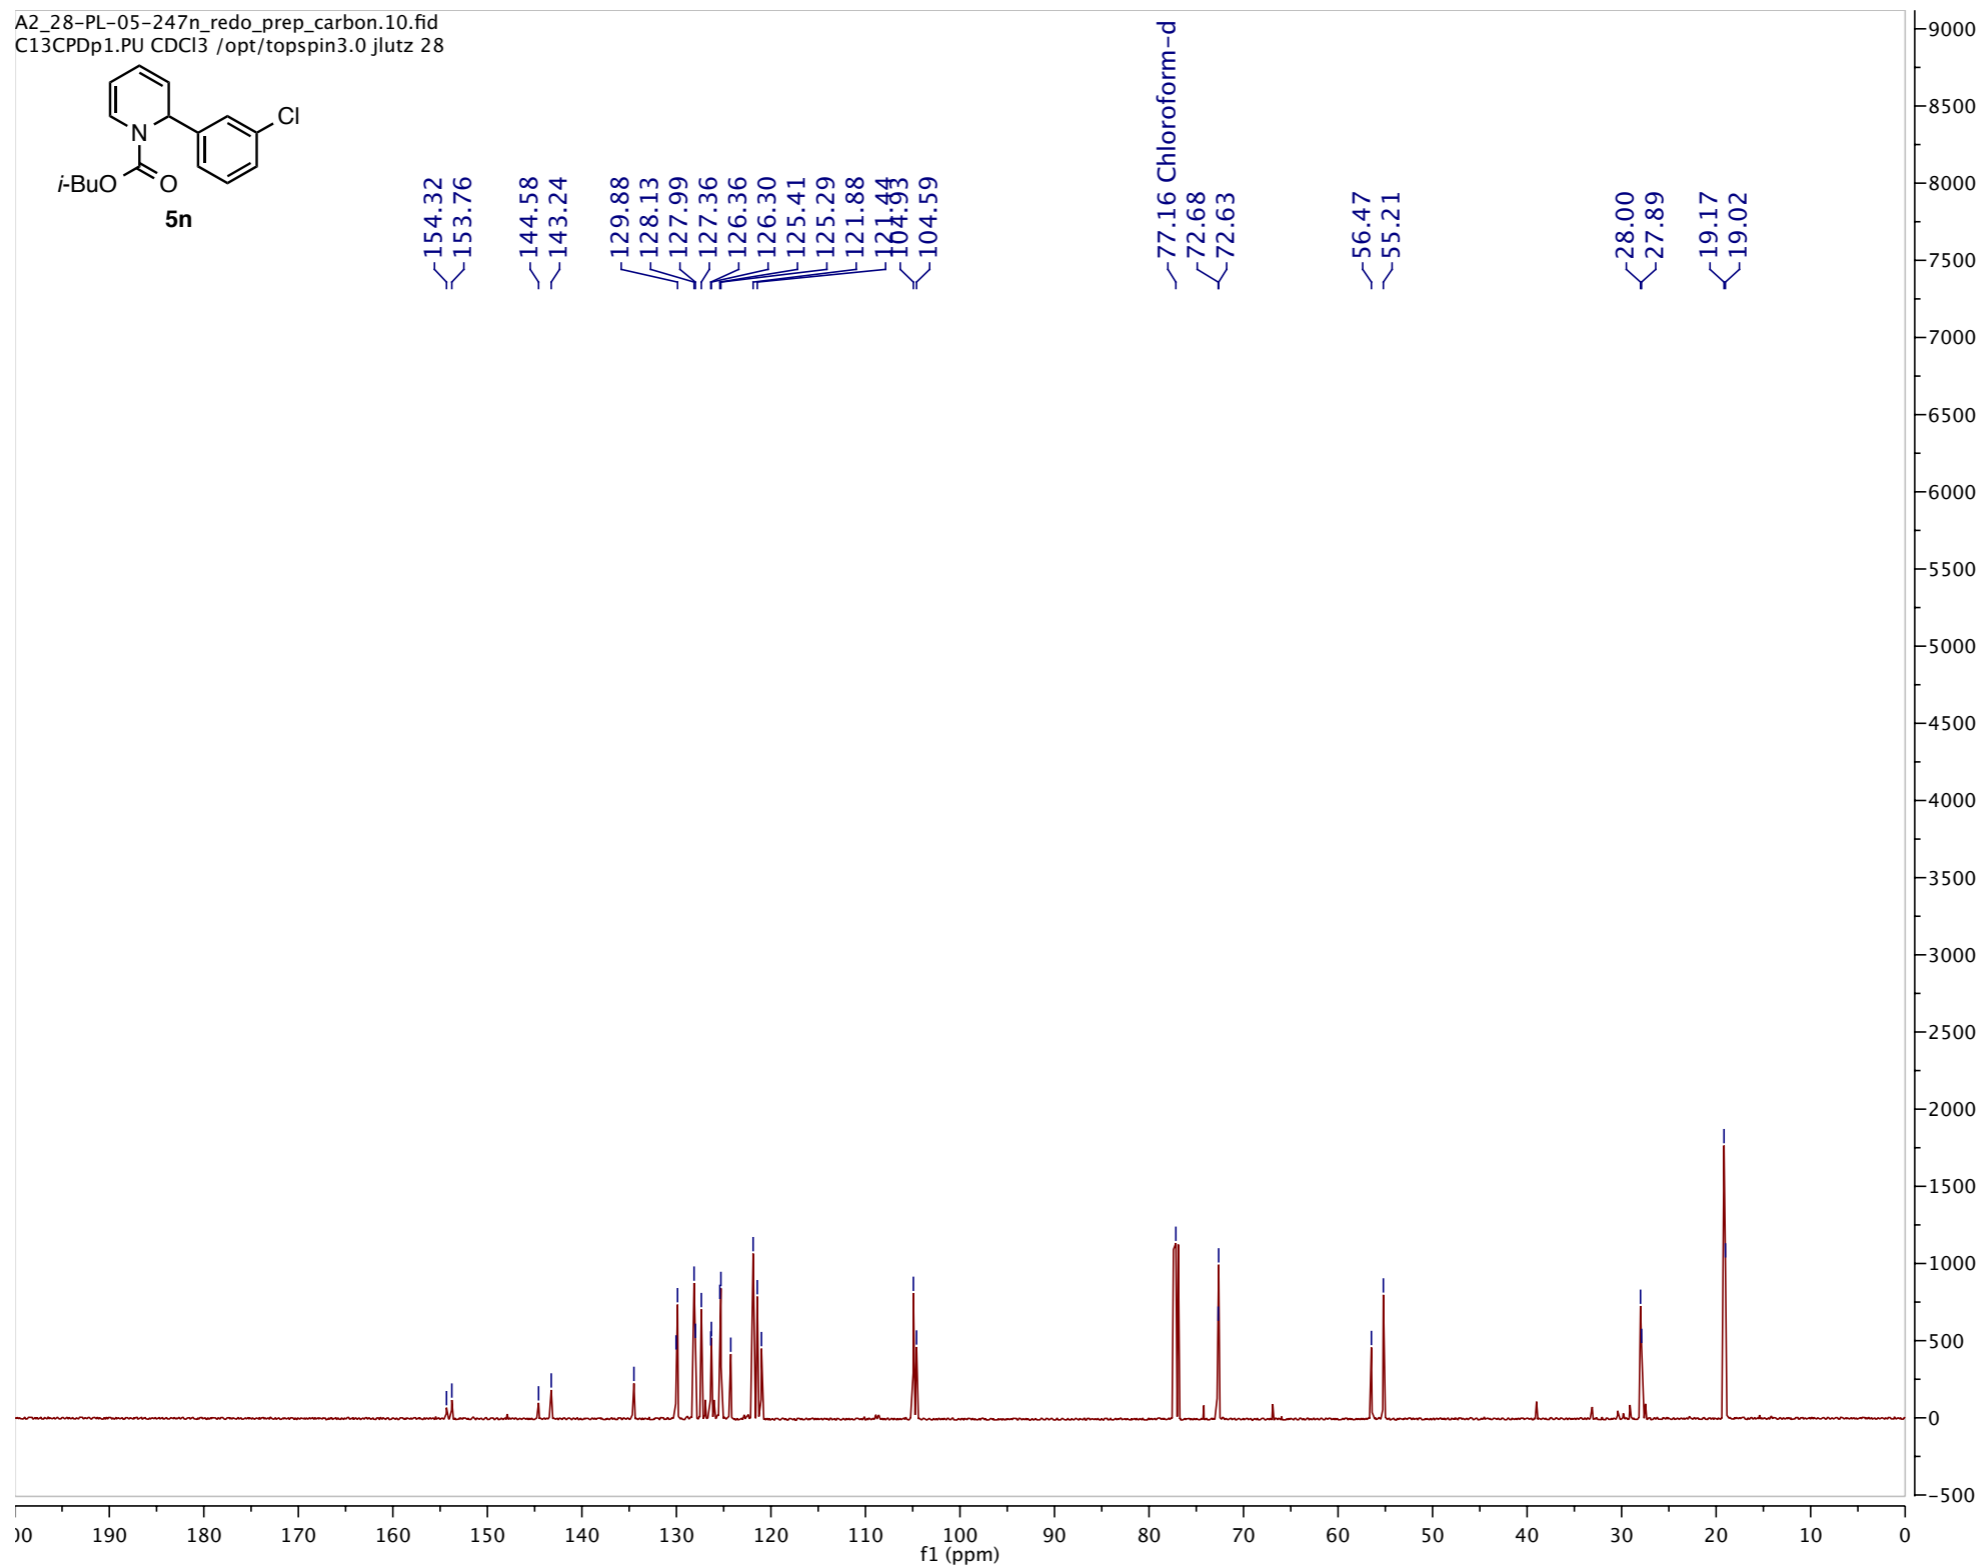

125 MHz  $^{13}\text{C}$ -NMR spectrum of **5n** in  $\text{CDCl}_3$

NB3\_PL-03-231.10.fid

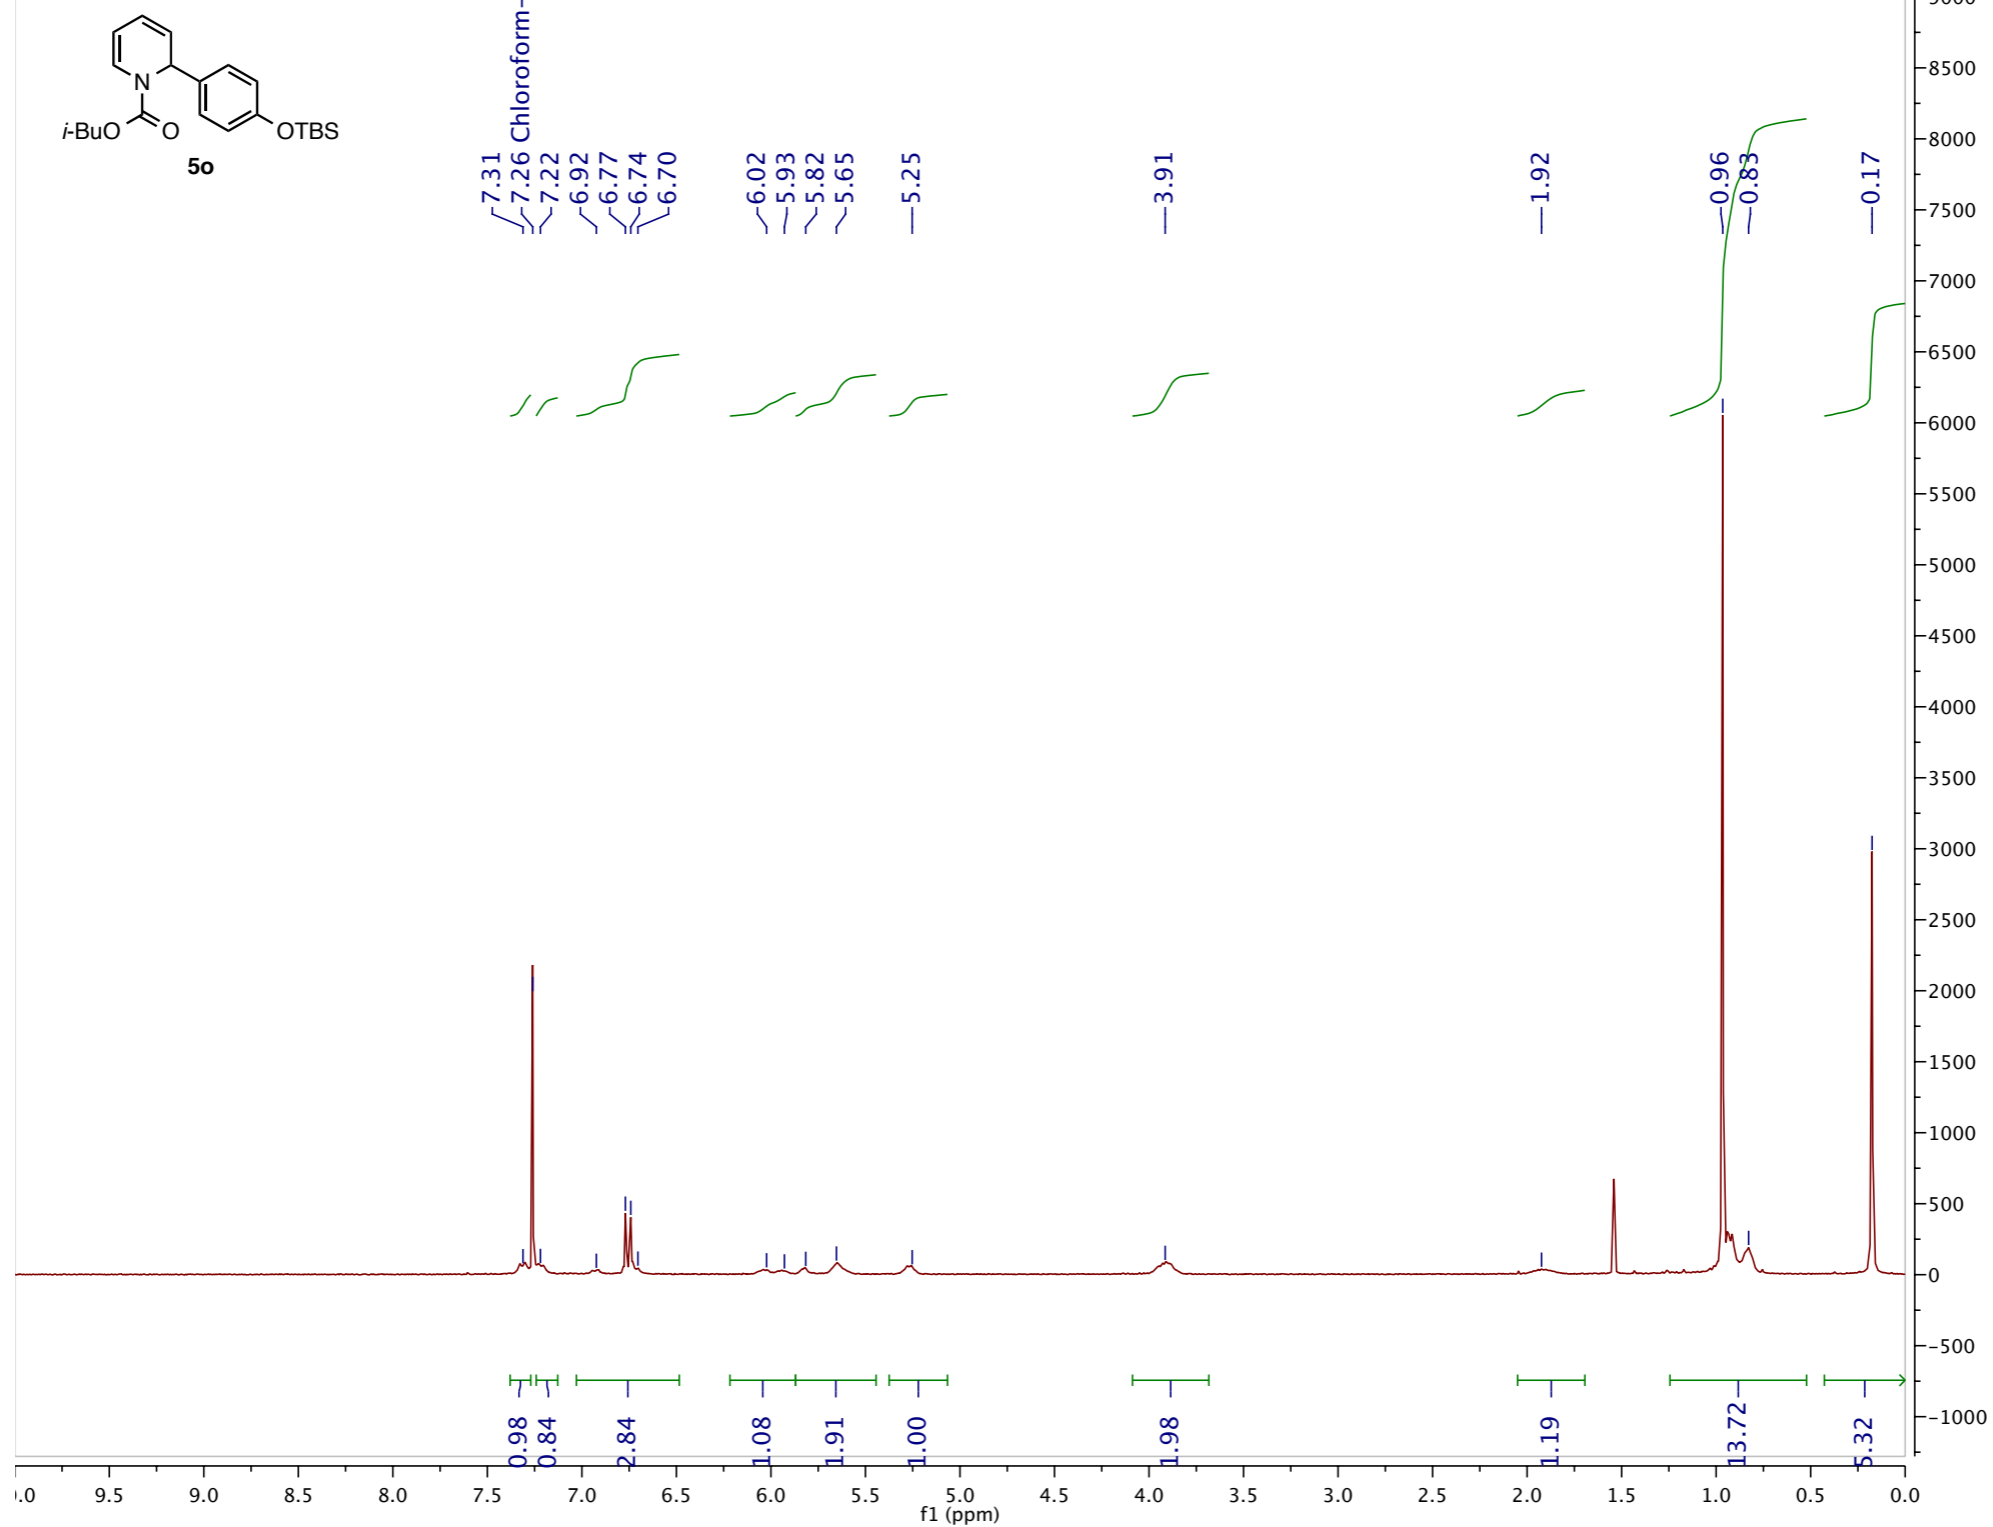

300 MHz <sup>1</sup>H-NMR spectrum of **5o** in CDCl<sub>3</sub>

A2\_50-PL-05-247O\_carbon.10.fid  
C13CPDp1.PU CDCl3 /opt/topspin3.0 jlutz 50

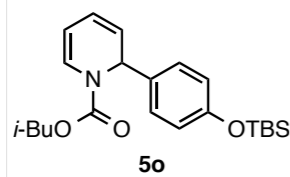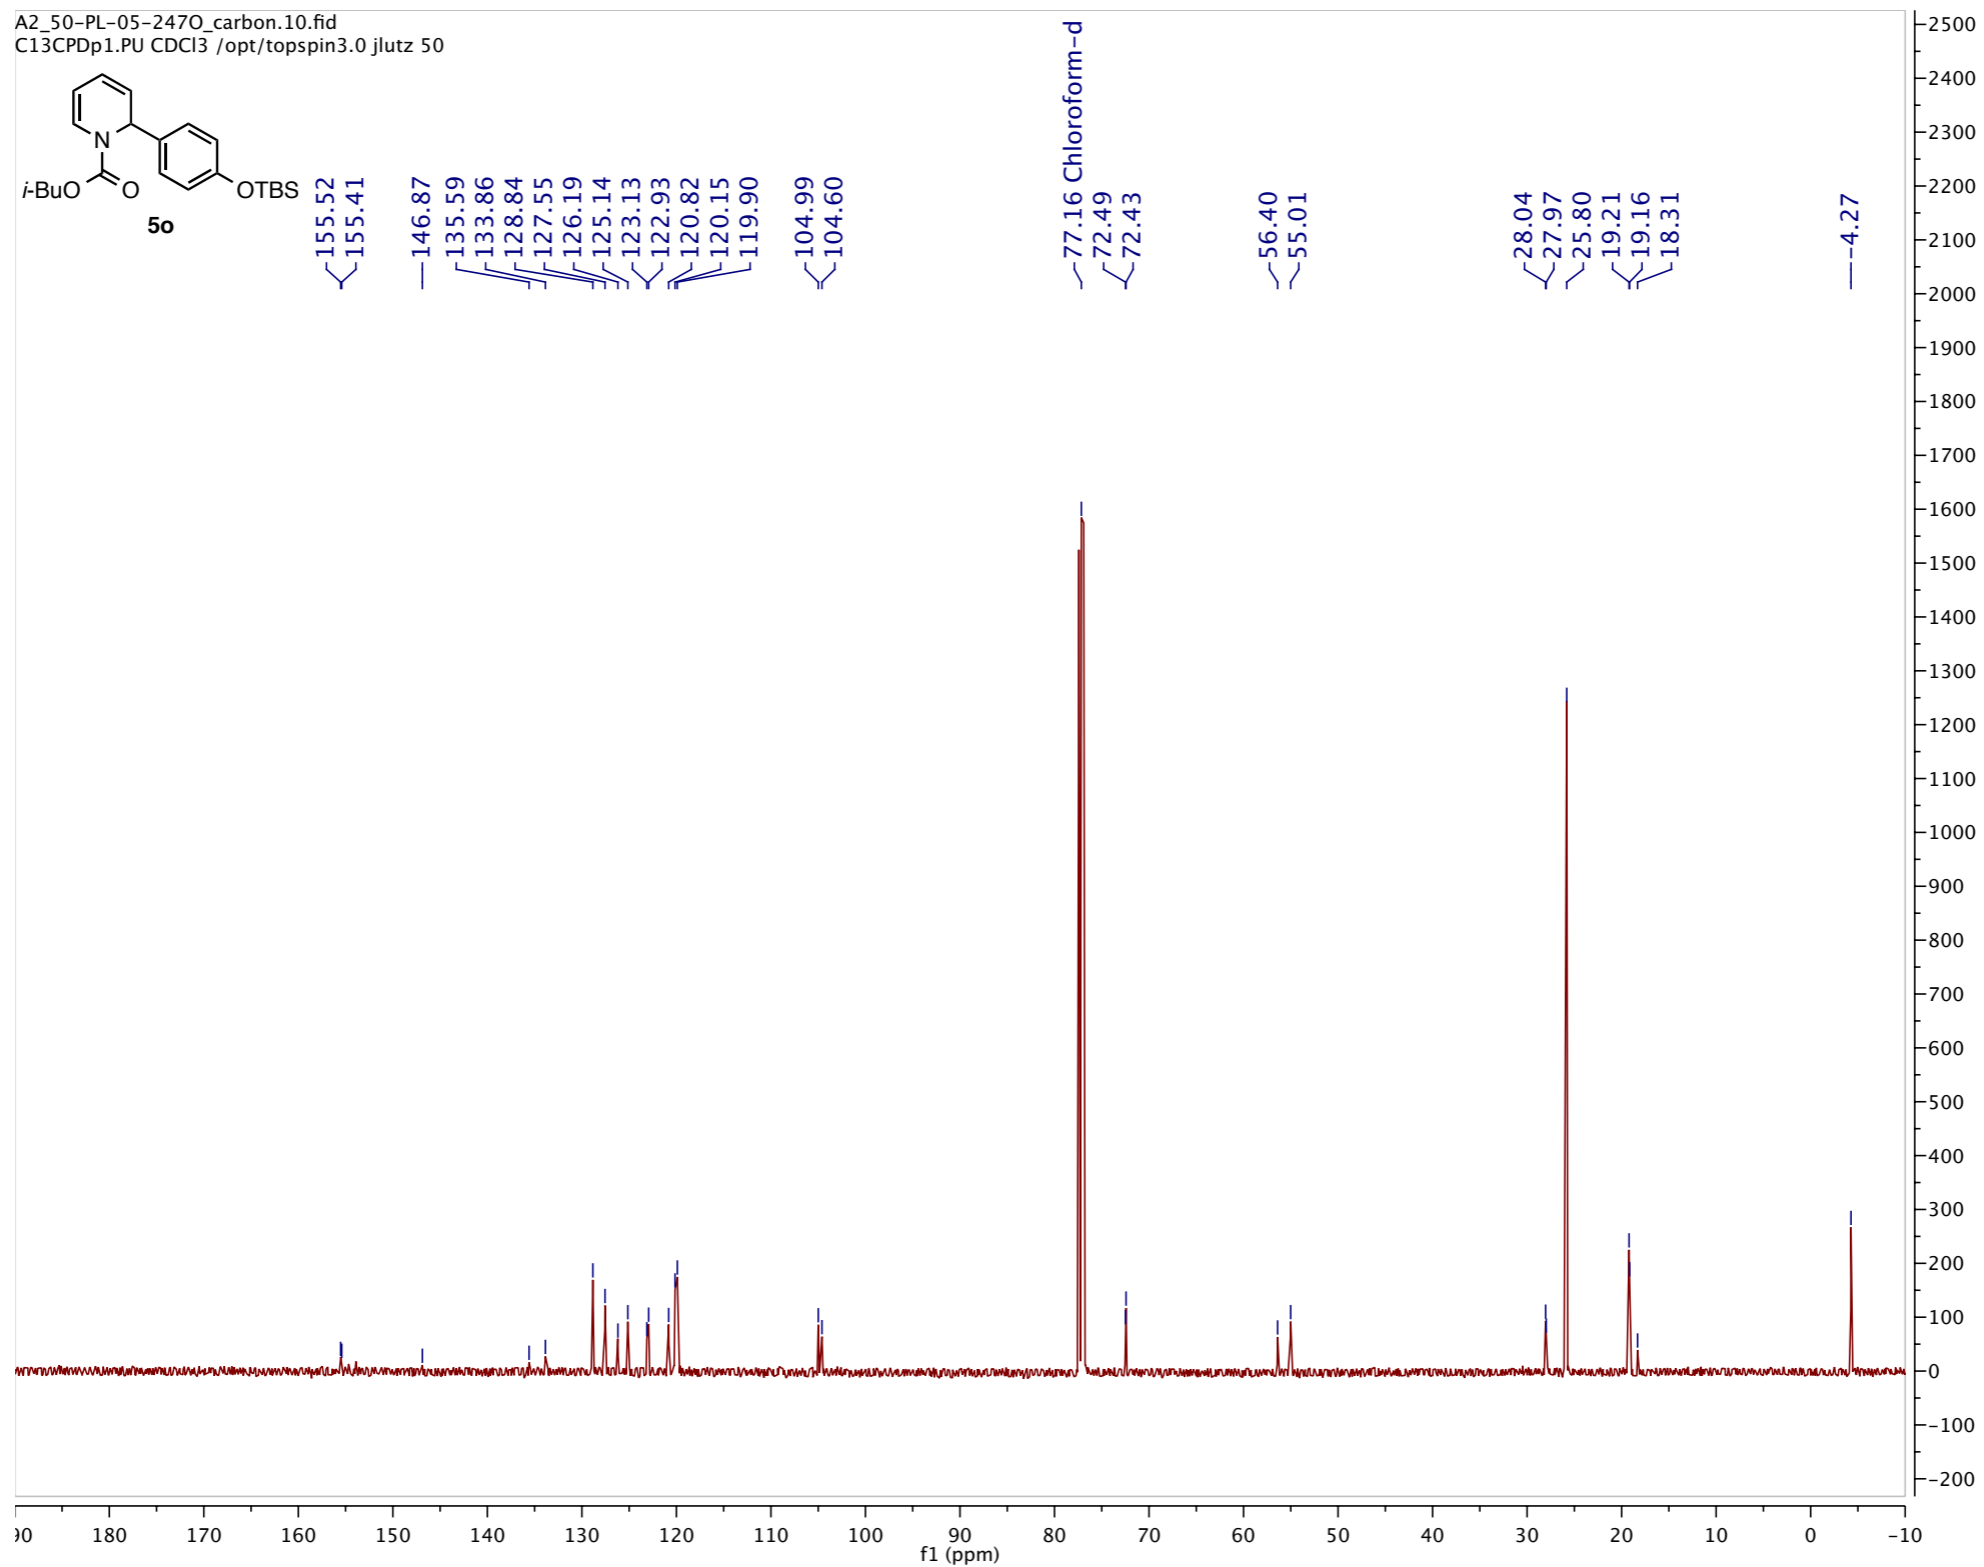

125 MHz <sup>13</sup>C-NMR spectrum of **5o** in CDCl<sub>3</sub>

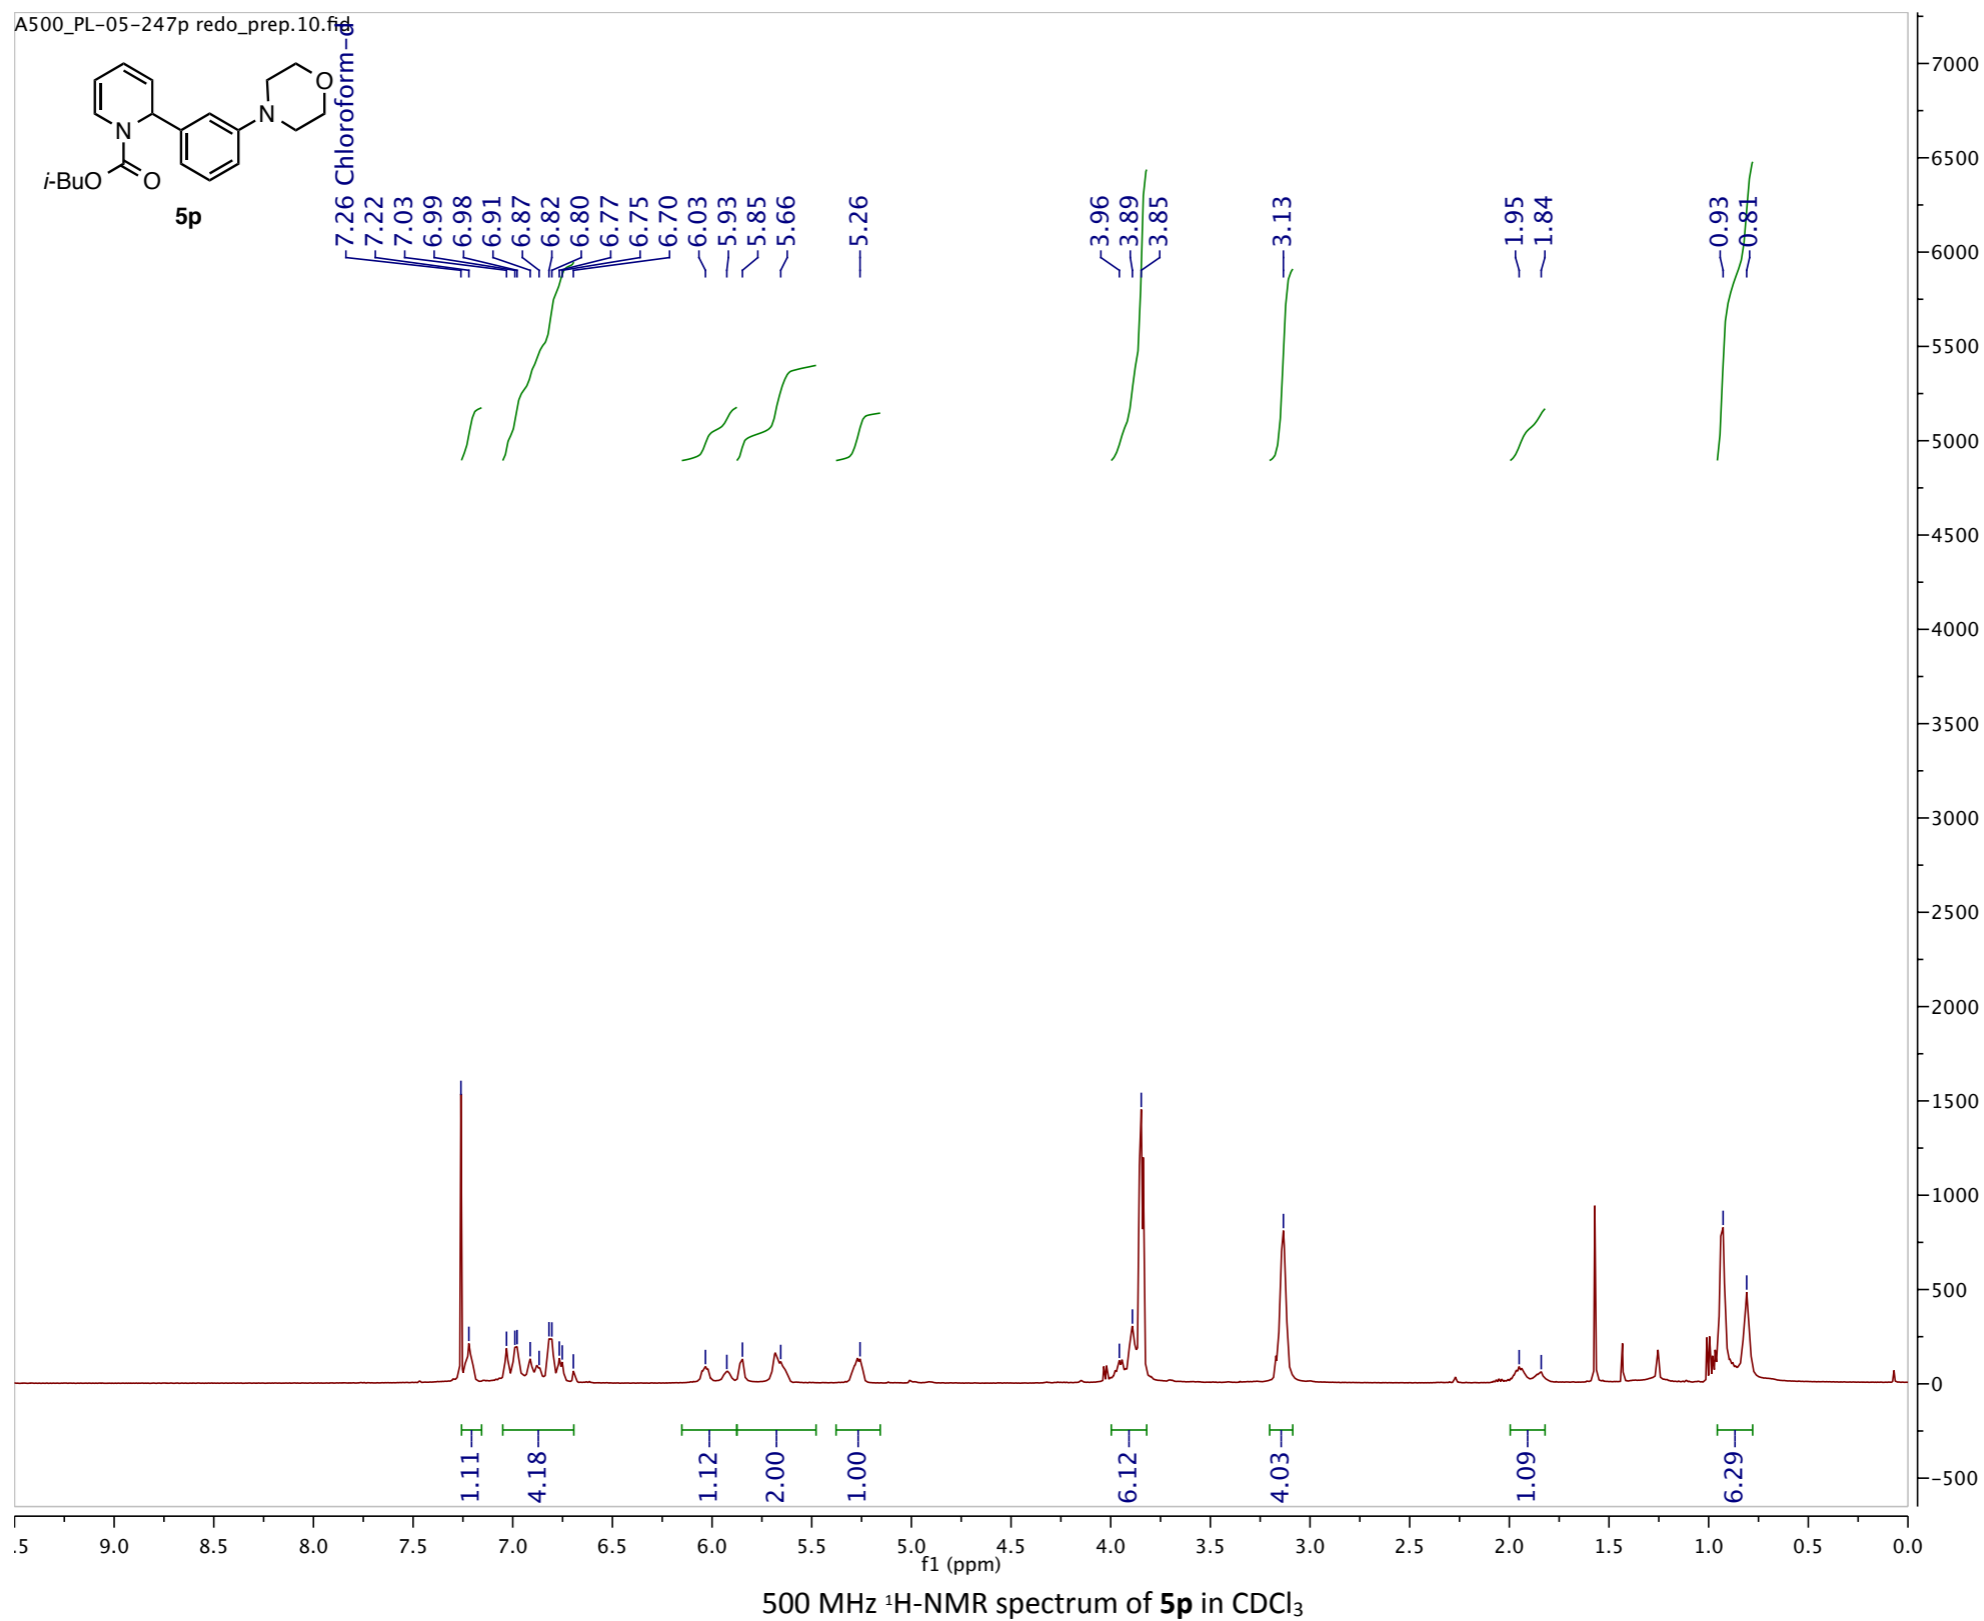



A2\_45-PL-05-247p redo\_prep\_carbon.12.fid  
C13CPDp1.PU CDCl3 /opt/topspin3.0 jlutz 45

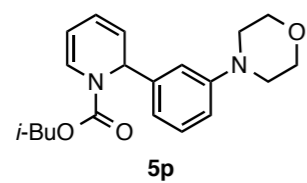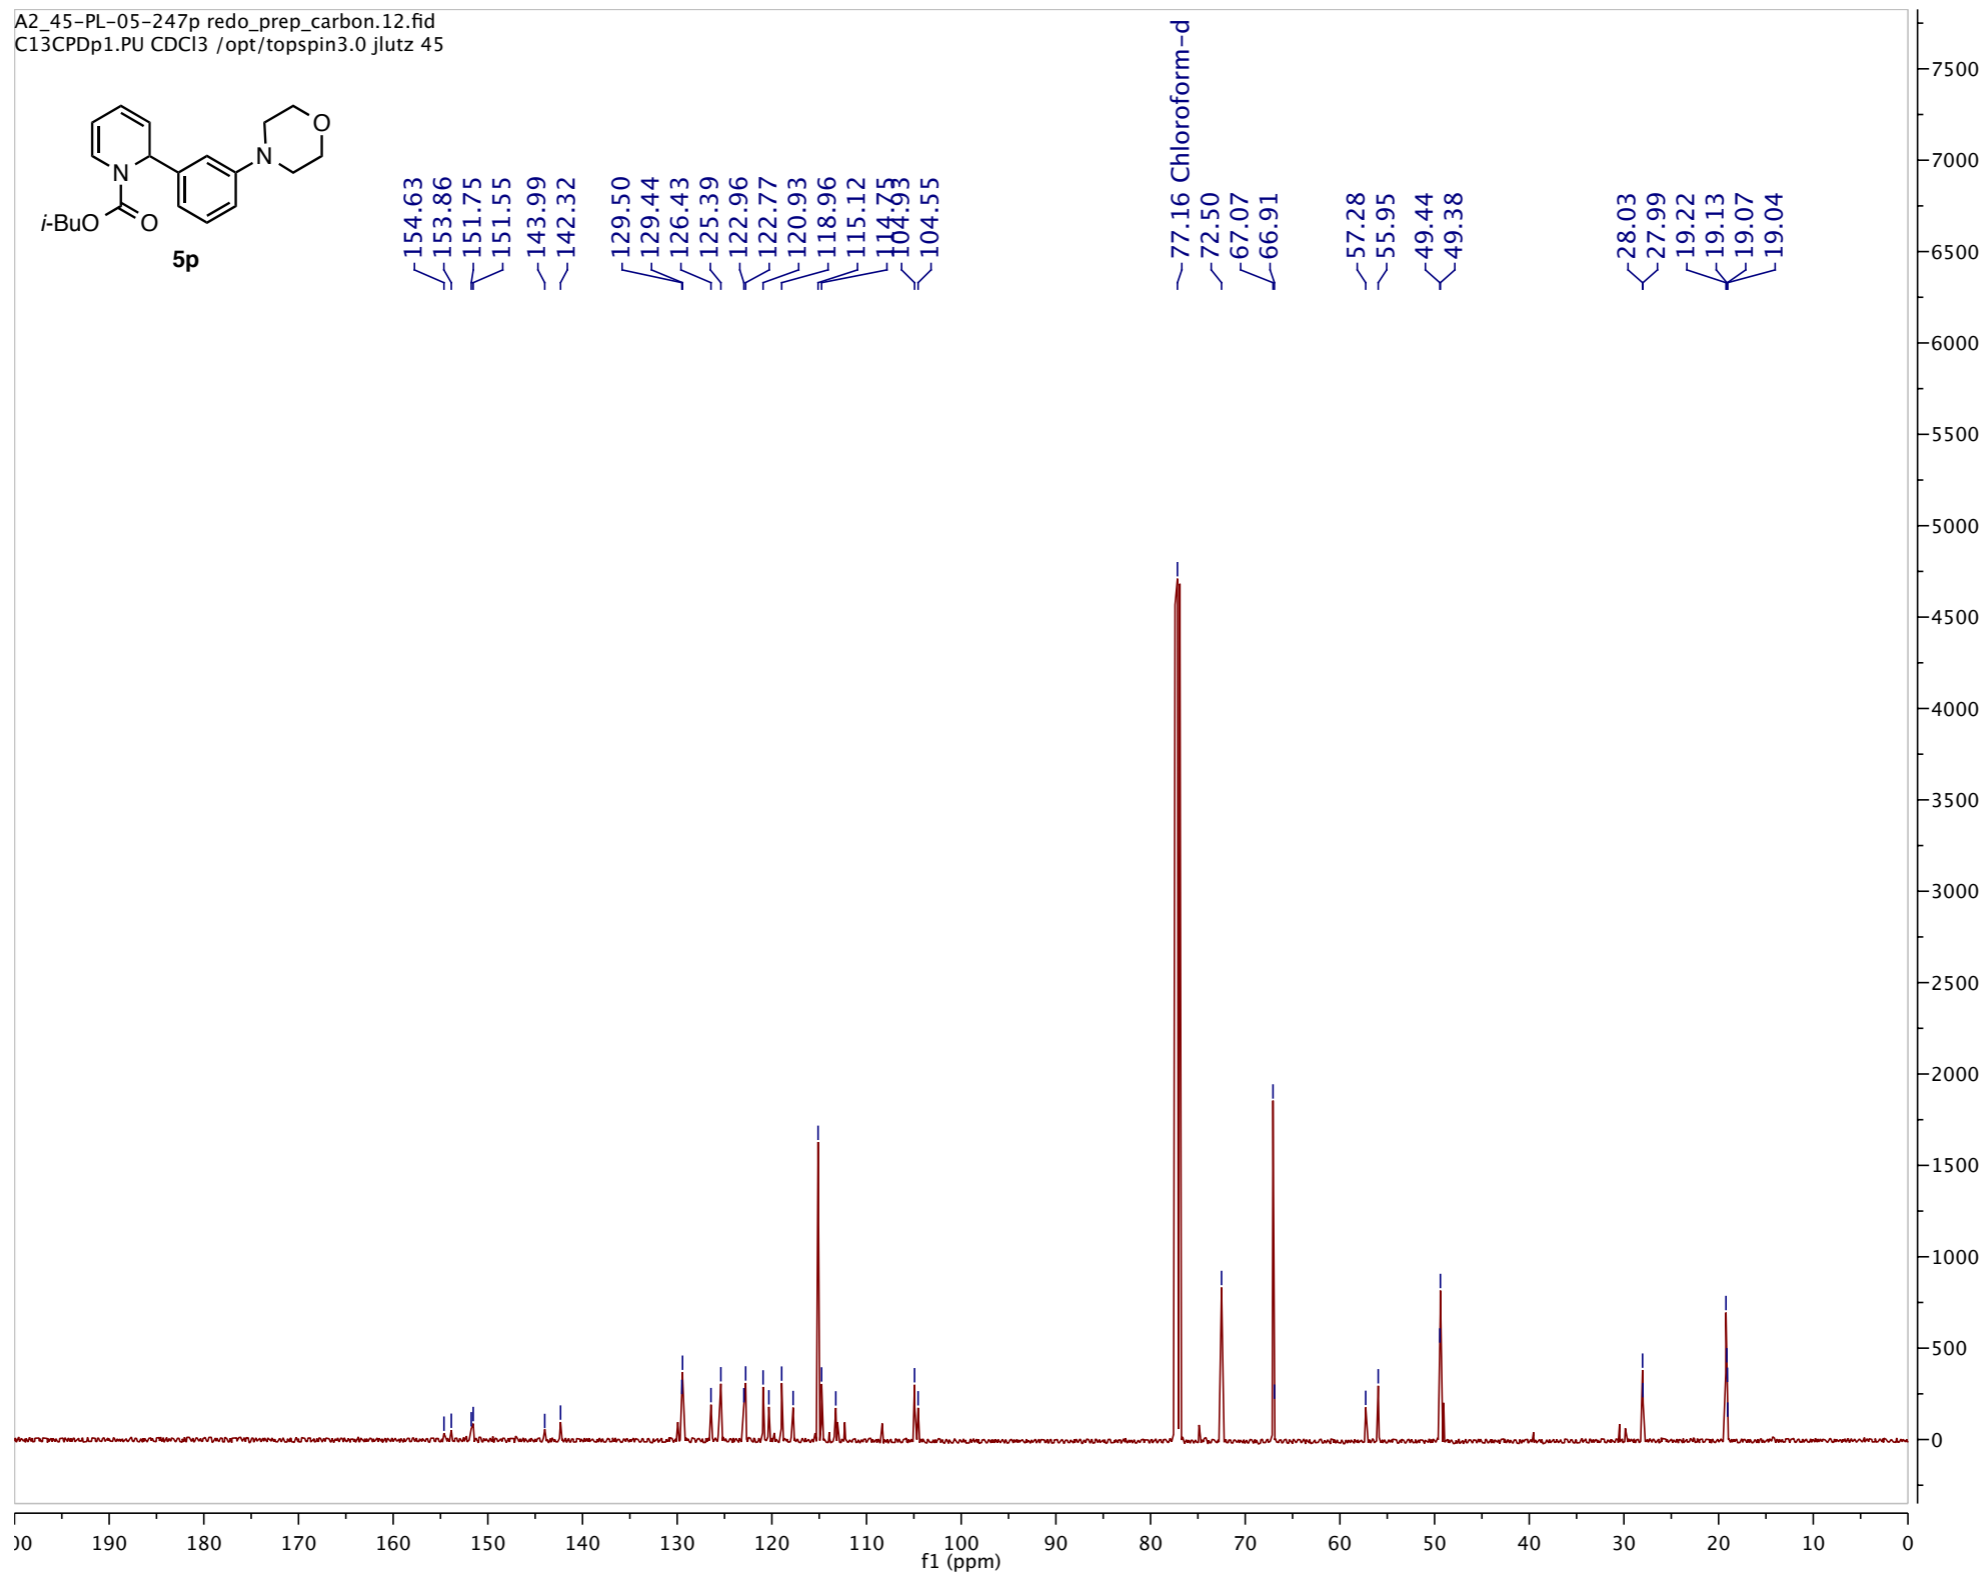

125 MHz  $^{13}\text{C}$ -NMR spectrum of **5p** in  $\text{CDCl}_3$

NB3\_PL-04-241.10.fid

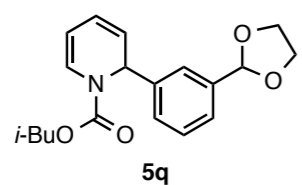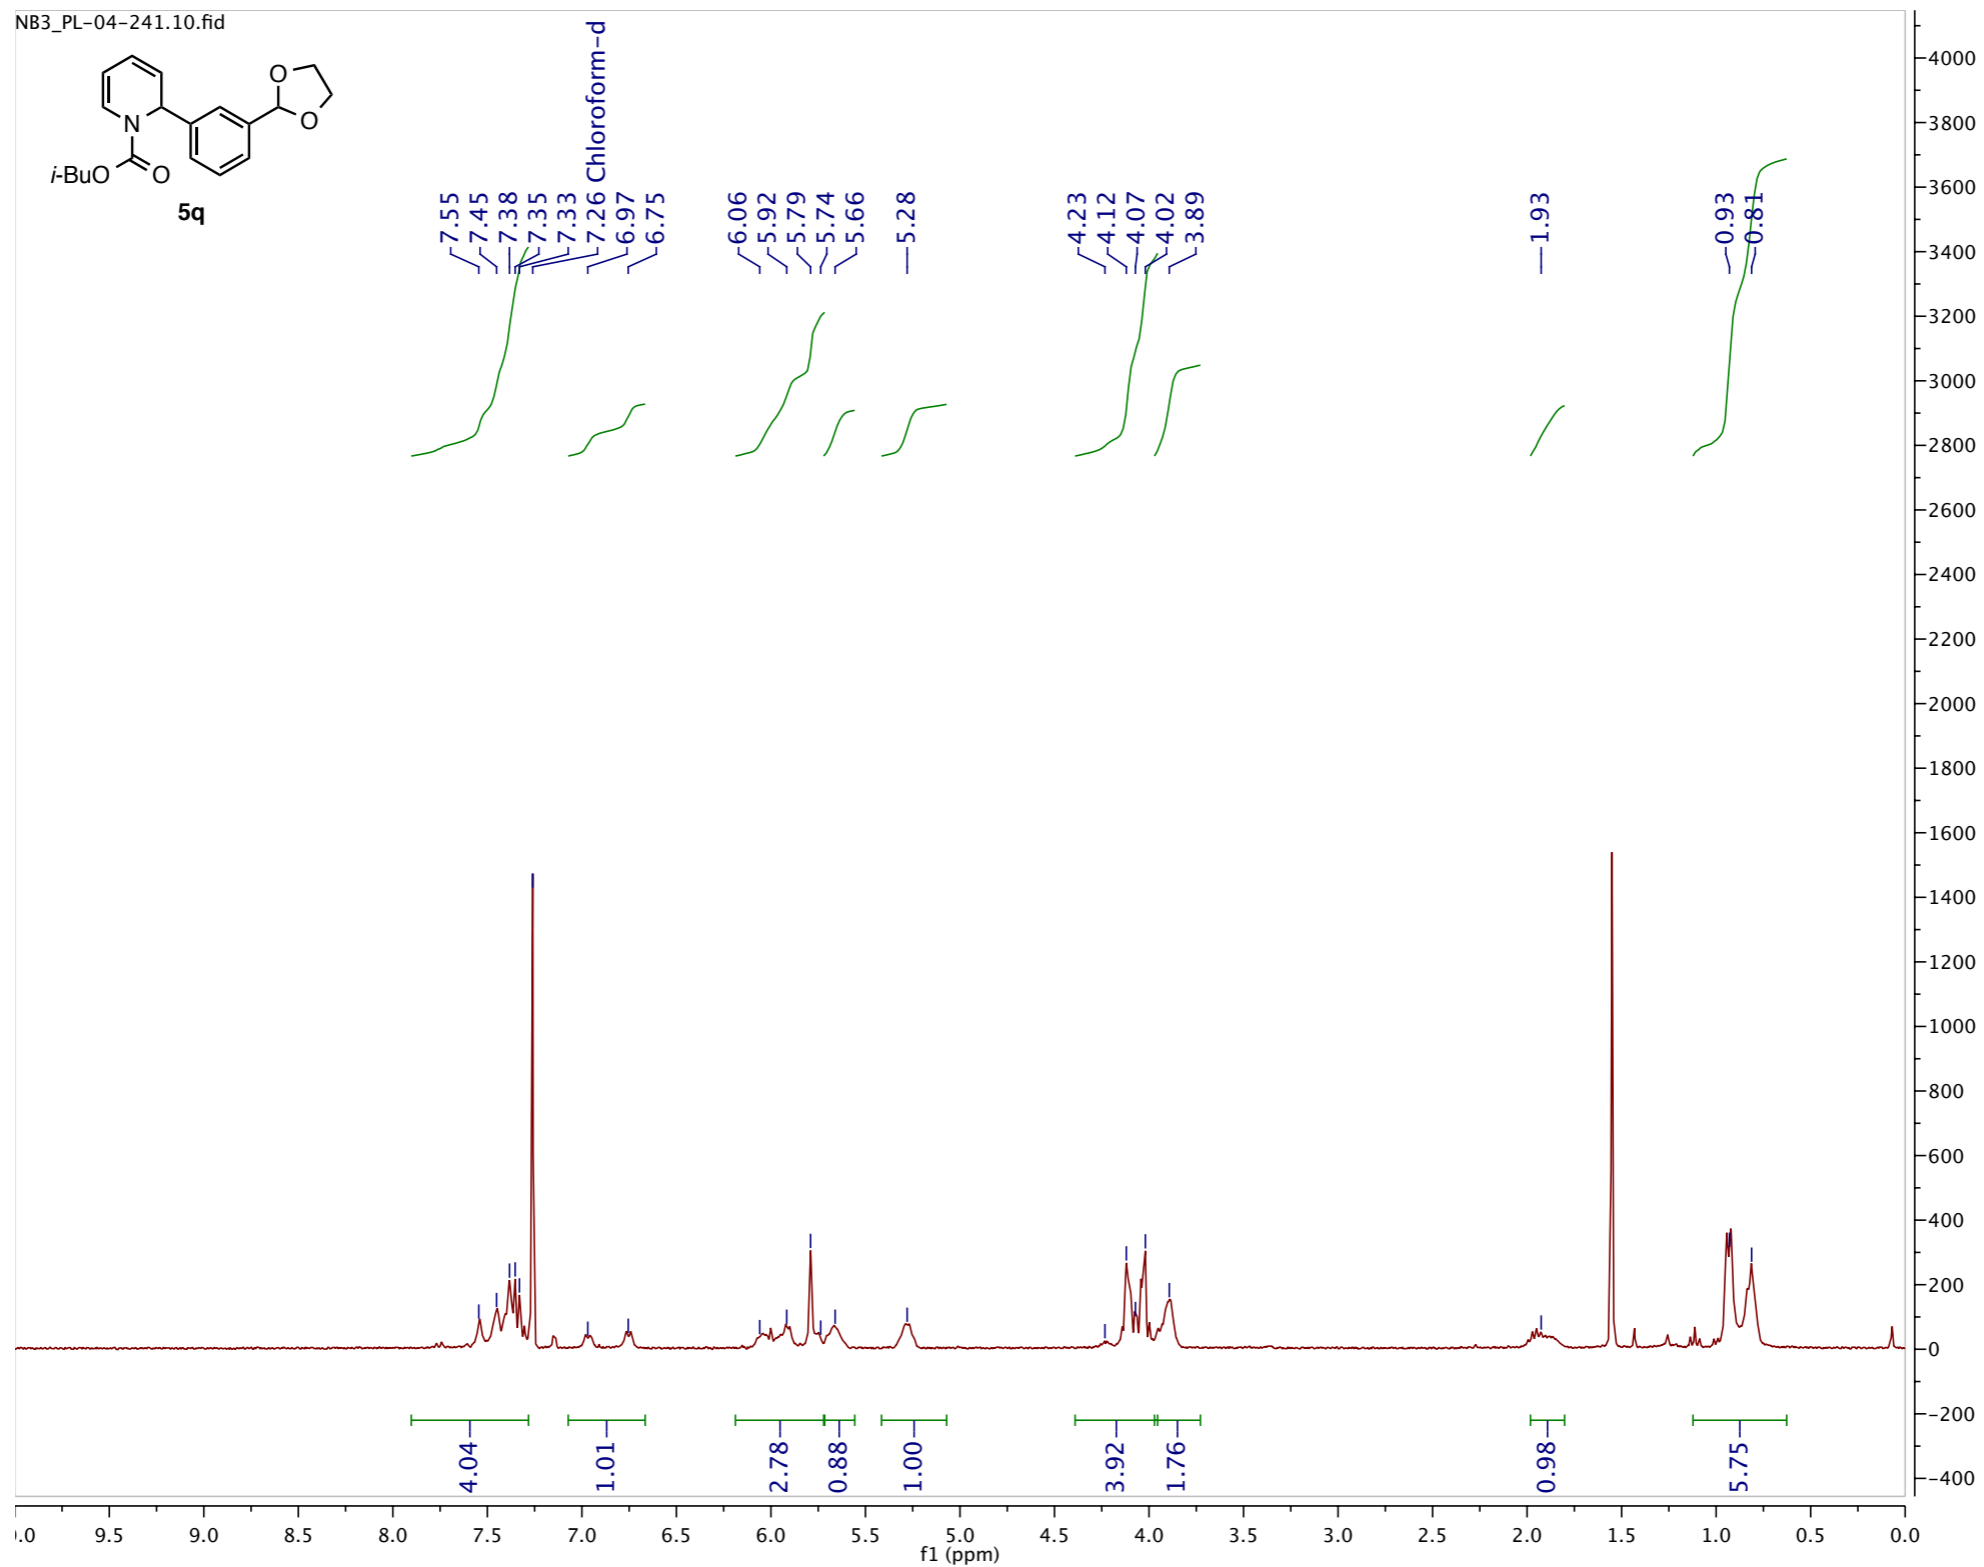

A2\_26-PL-06-057q\_carbon.10.fid  
C13CPDp1.PU CDCl3 /opt/topspin3.0 jlutz 26

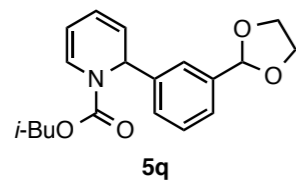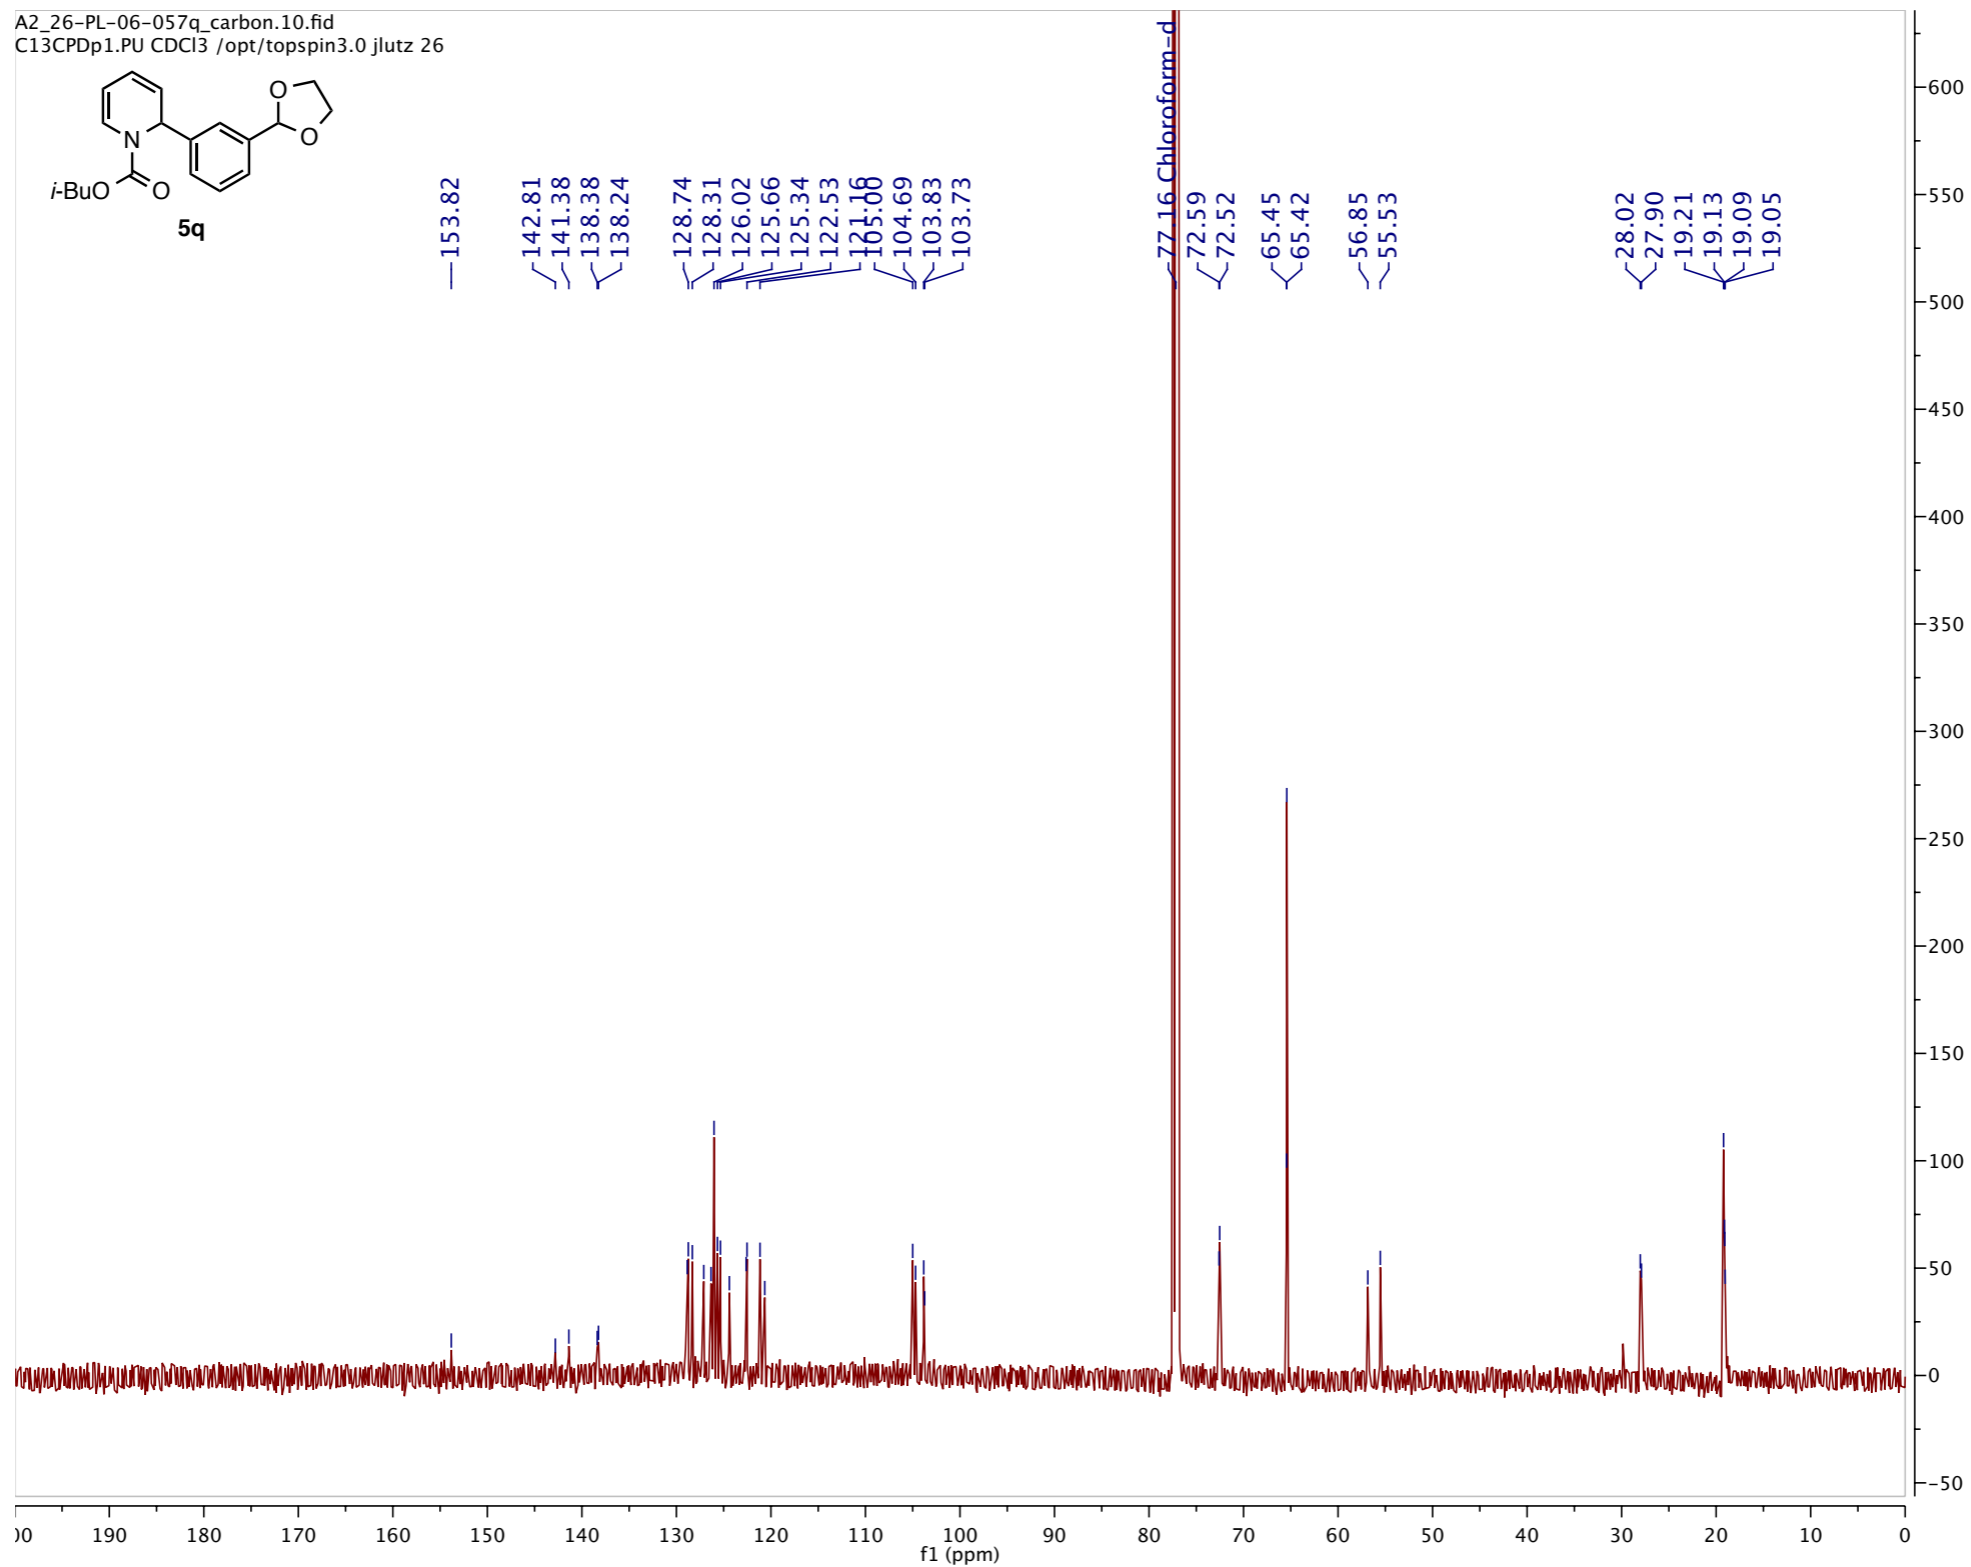

125 MHz  $^{13}\text{C}$ -NMR spectrum of **5q** in  $\text{CDCl}_3$

NB3\_PL-03-200\_recolumned.10.fid

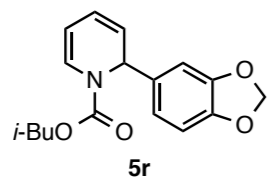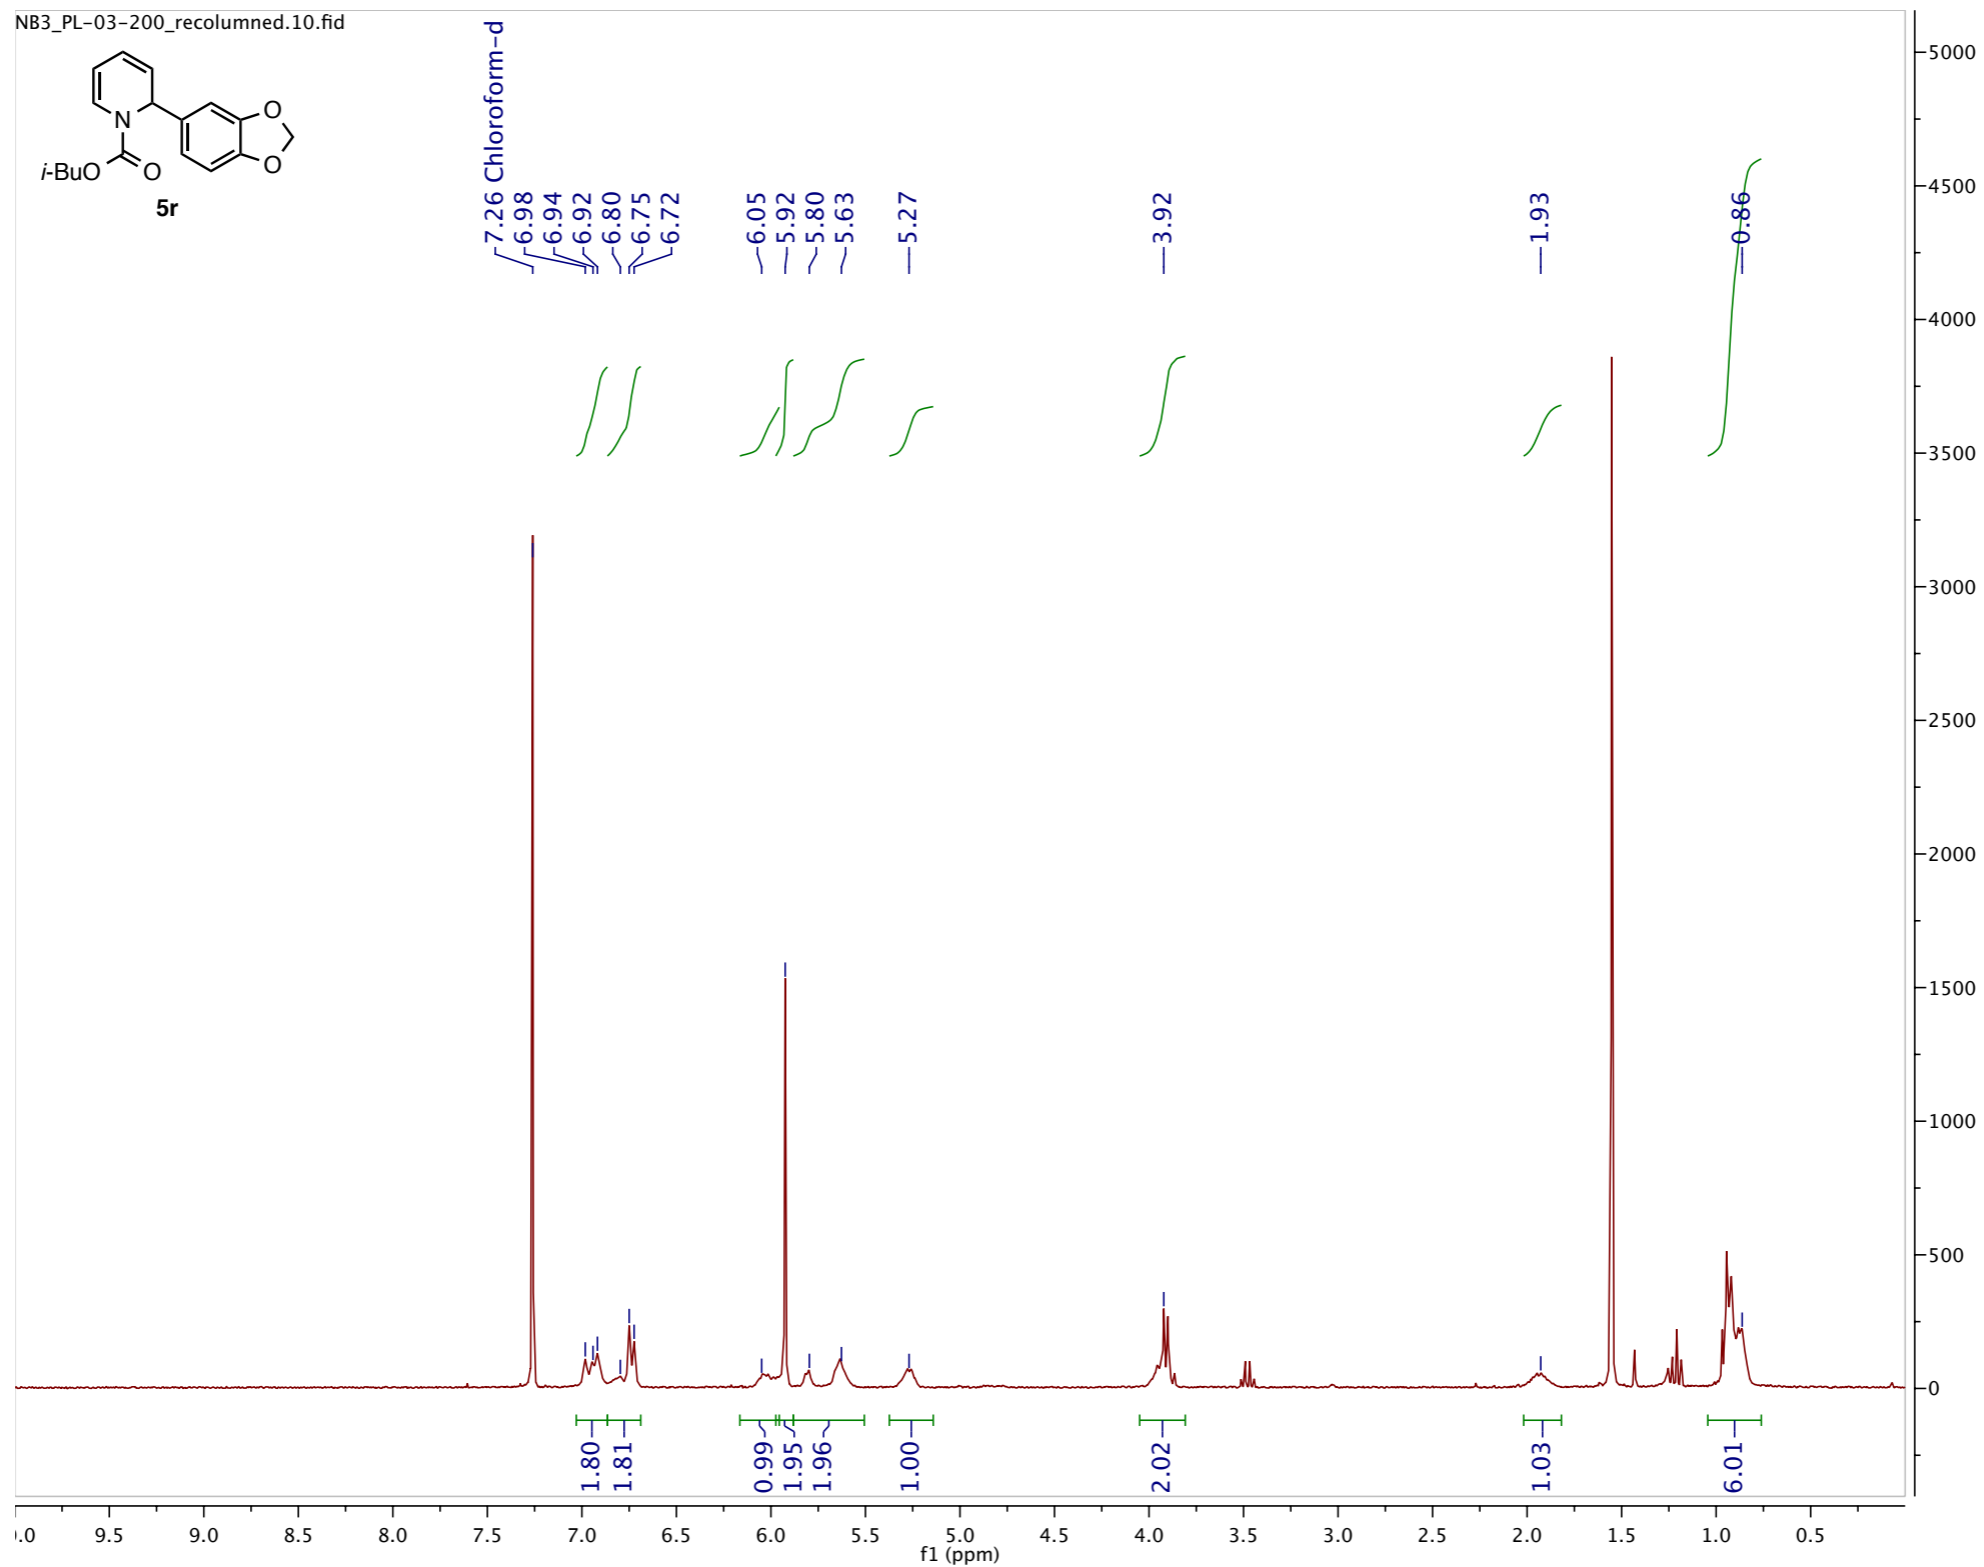

300 MHz <sup>1</sup>H-NMR spectrum of **5r** in CDCl<sub>3</sub>

A2\_21-PL-05-247R\_prep\_carbon.10.fid  
C13CPDp1\_PU CDCl3 /opt/topspin3.0 jlutz 21

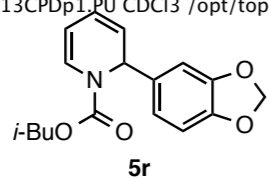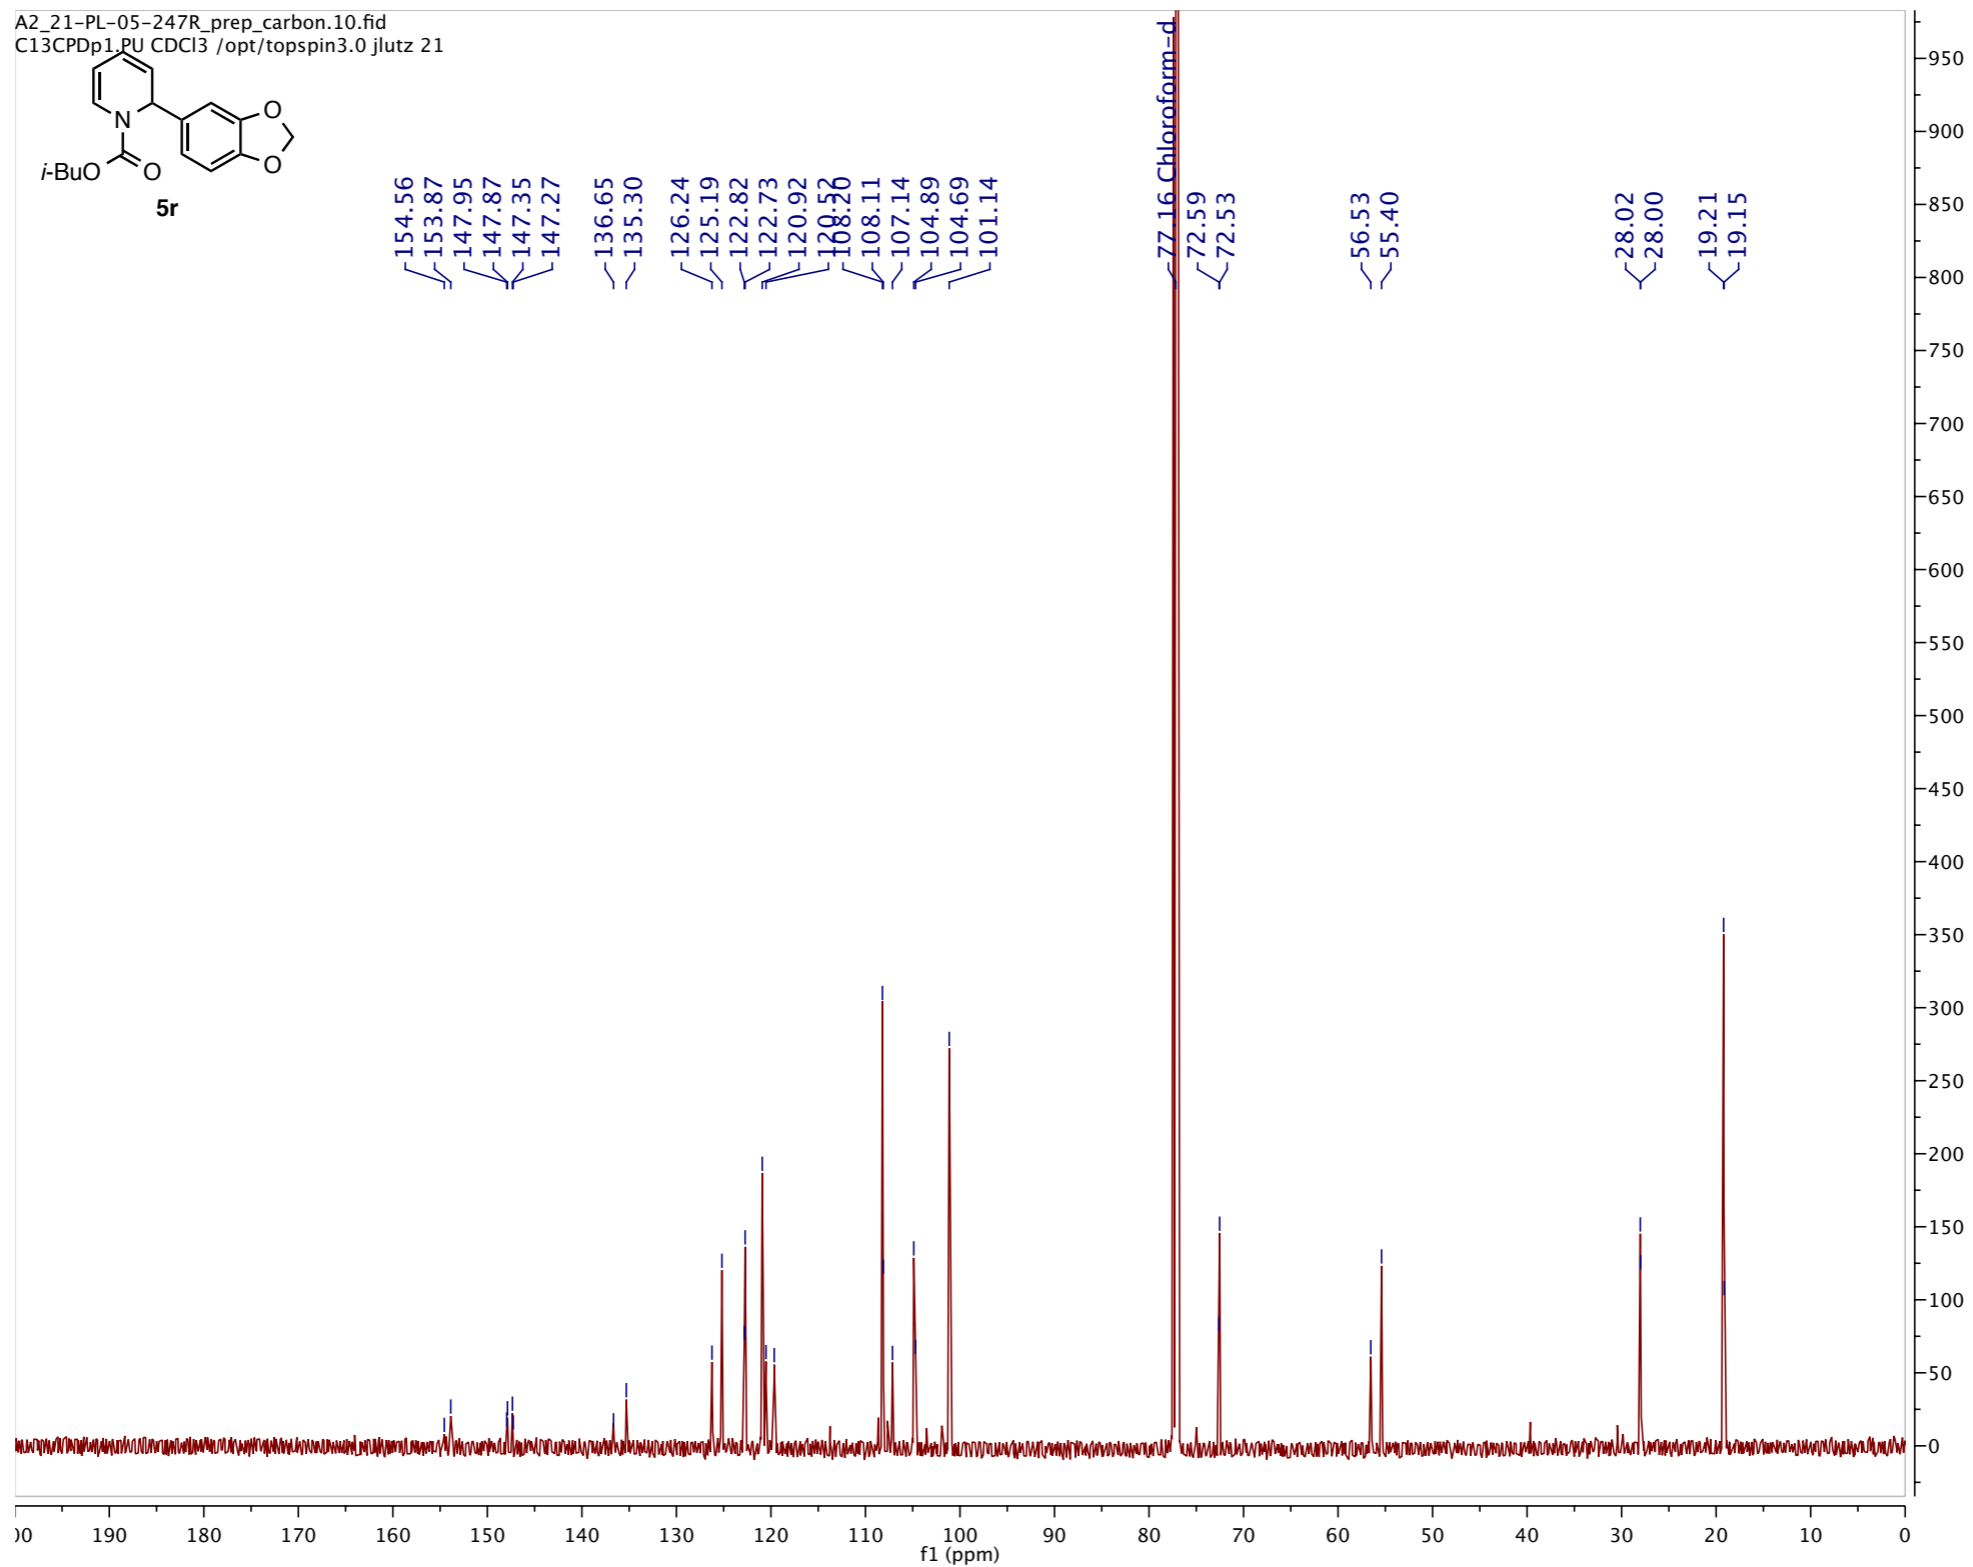

125 MHz <sup>13</sup>C-NMR spectrum of **5r** in CDCl<sub>3</sub>

NB3\_PL-04-155.10.fid

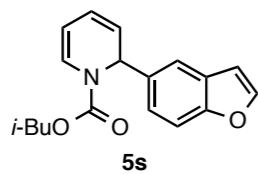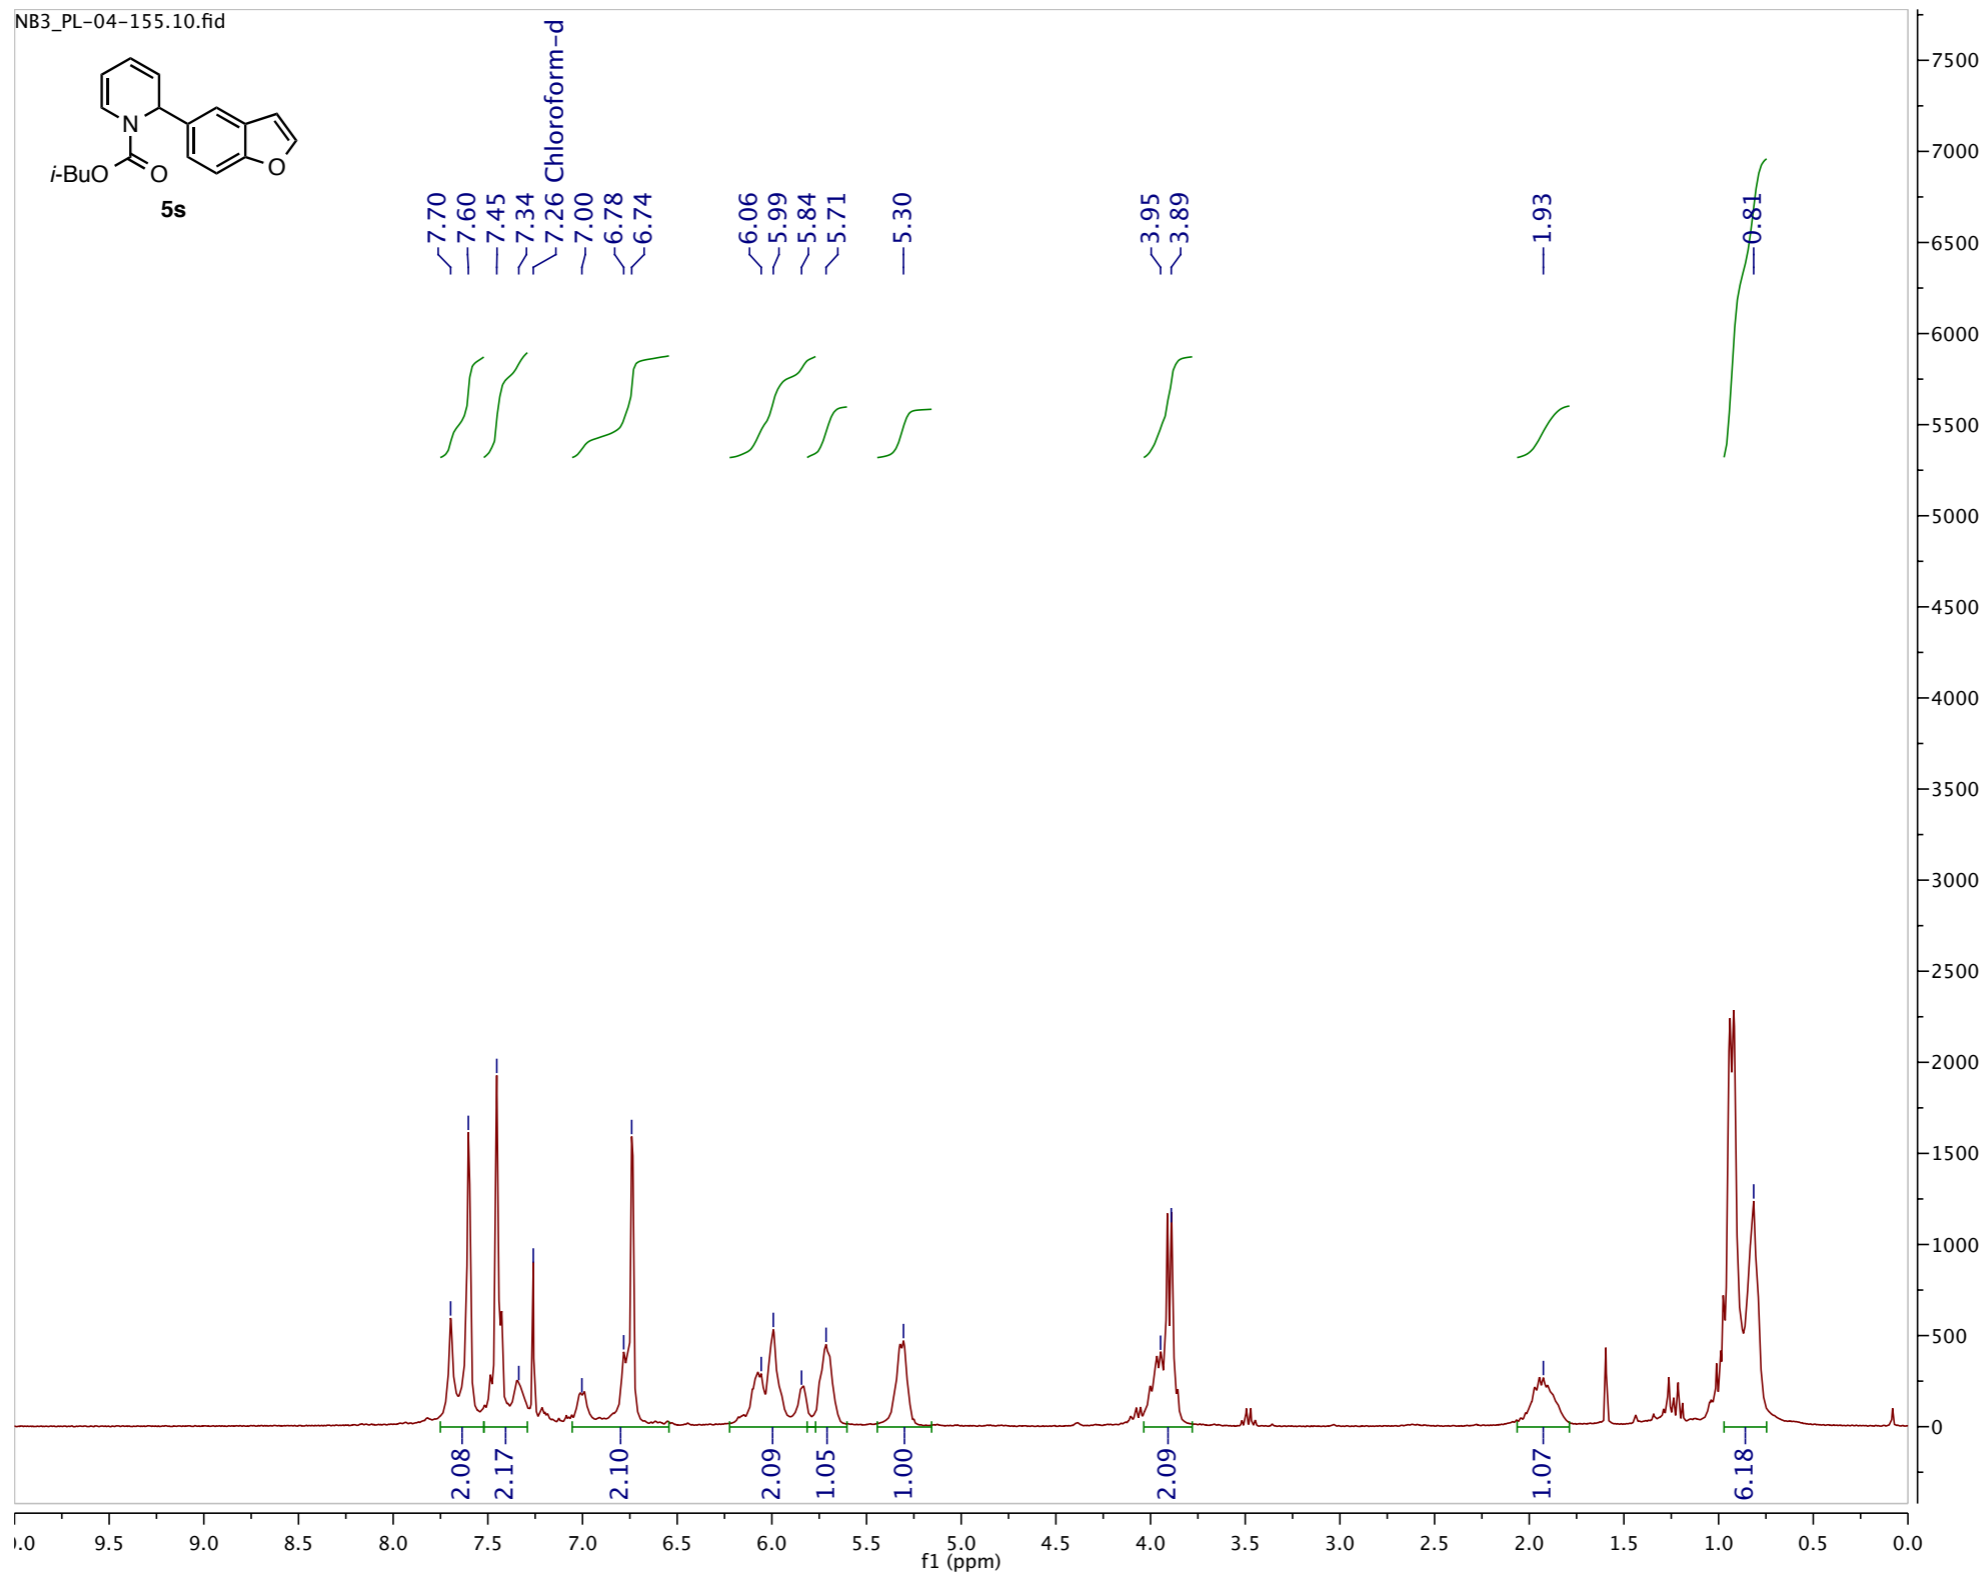

A2\_22-PL-05-247S\_carbon.10.fid  
C13CPDp1.PU CDCl3 /opt/topspin3.0 jlutz 22

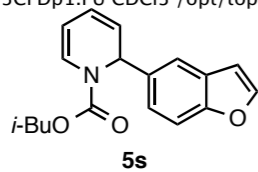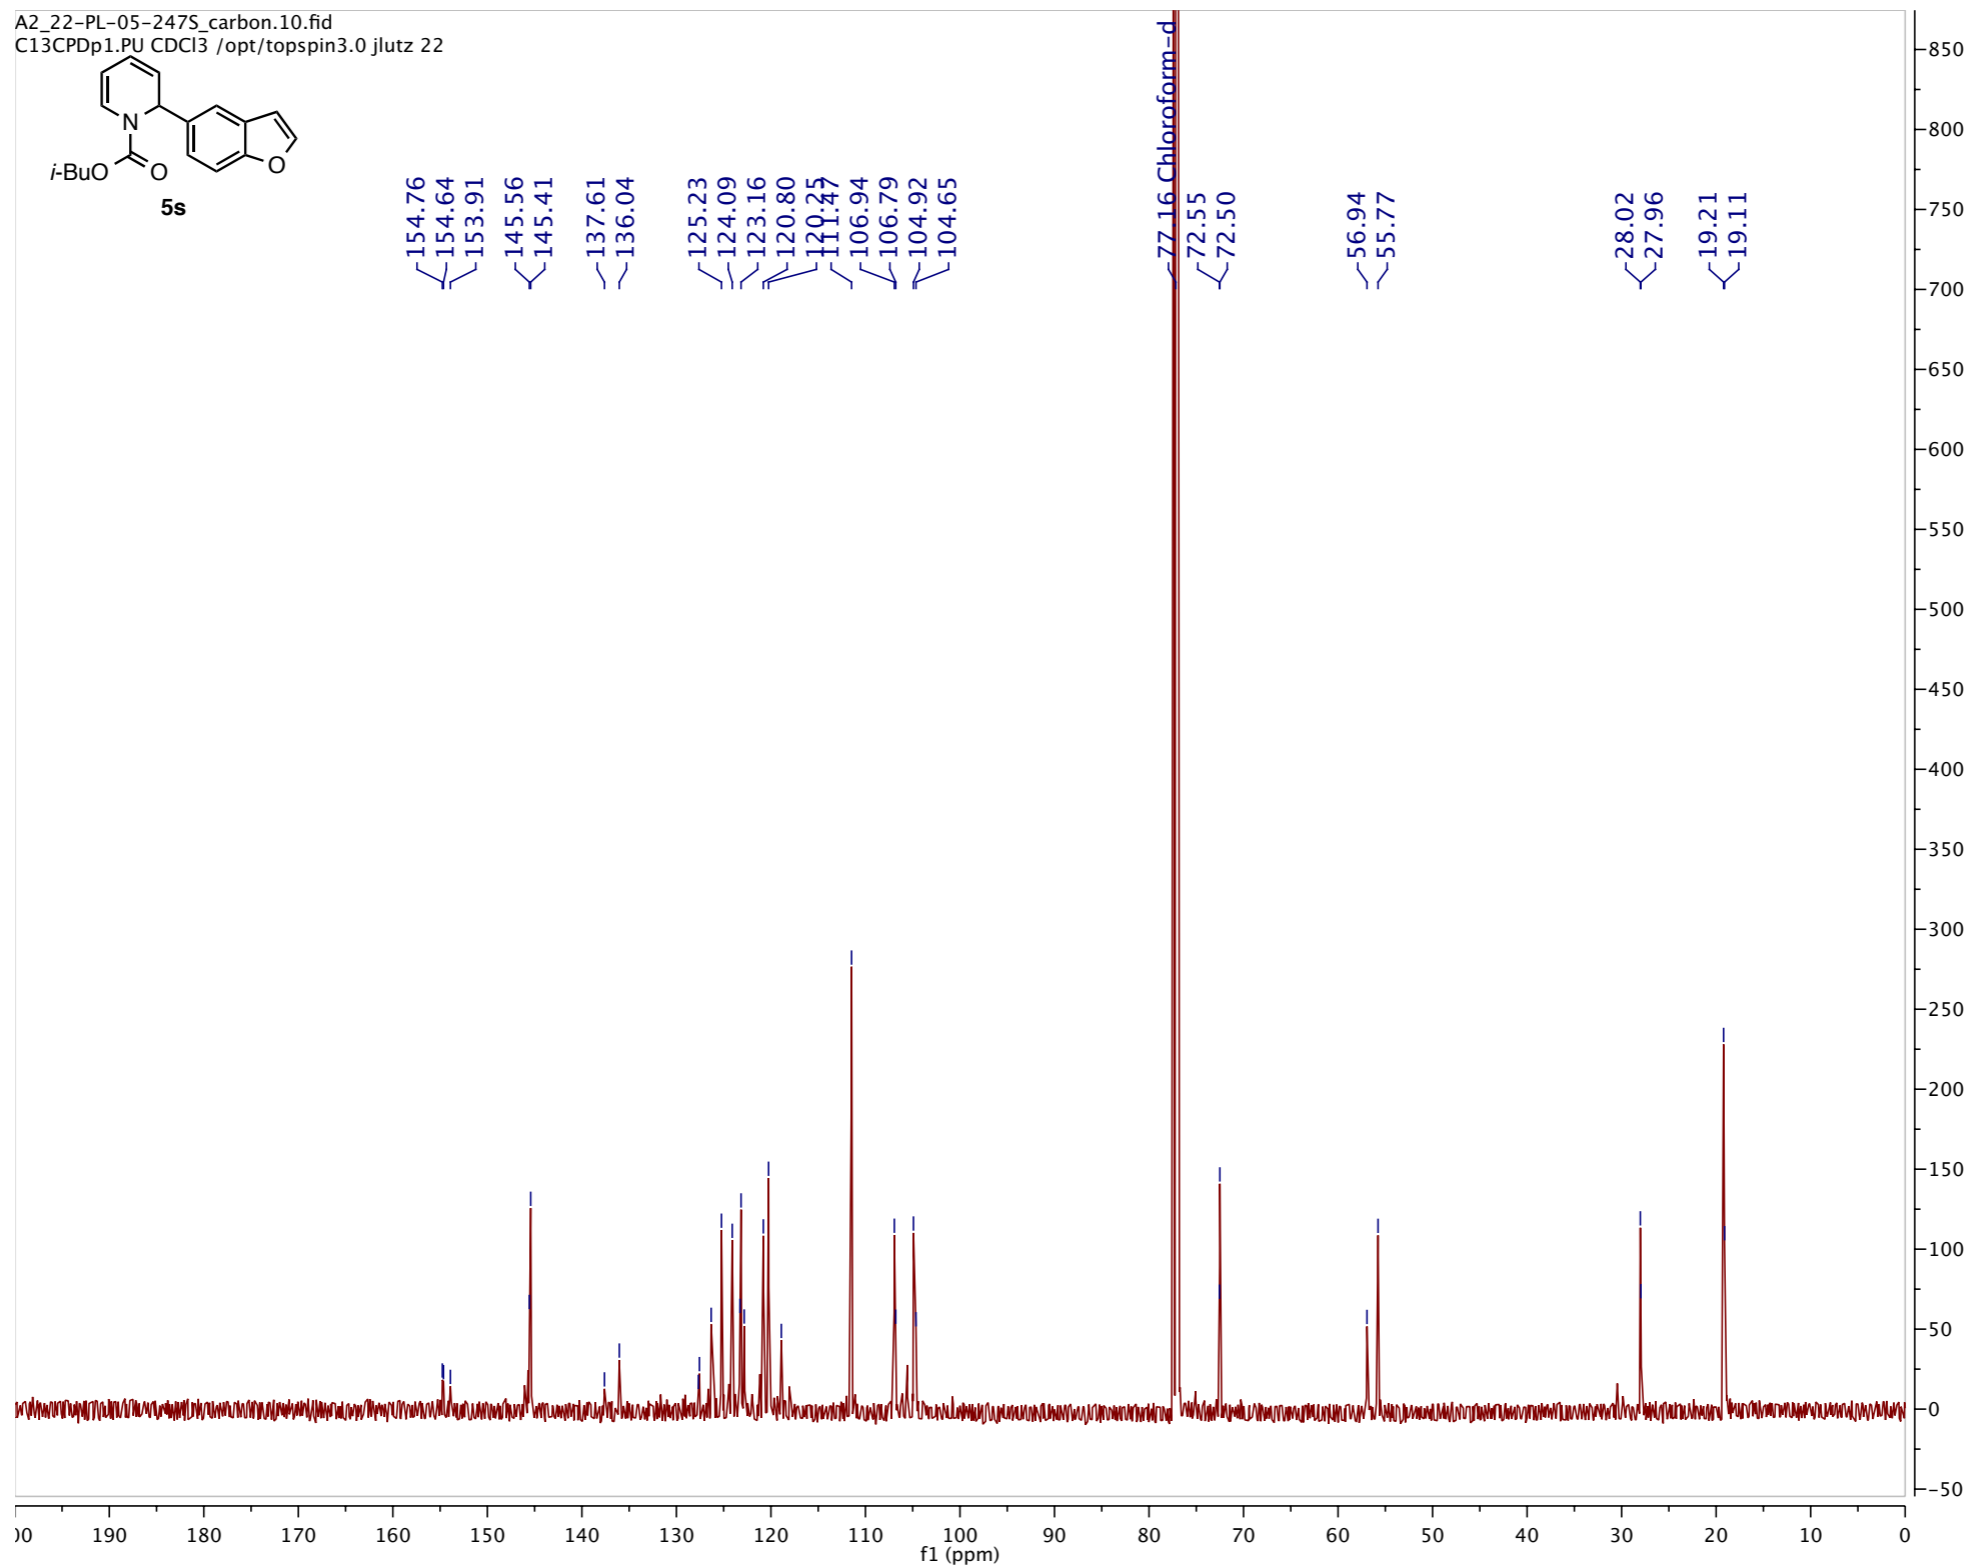

NB3\_PL-03-220b.10.fid

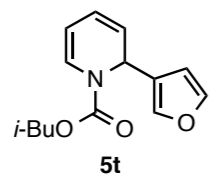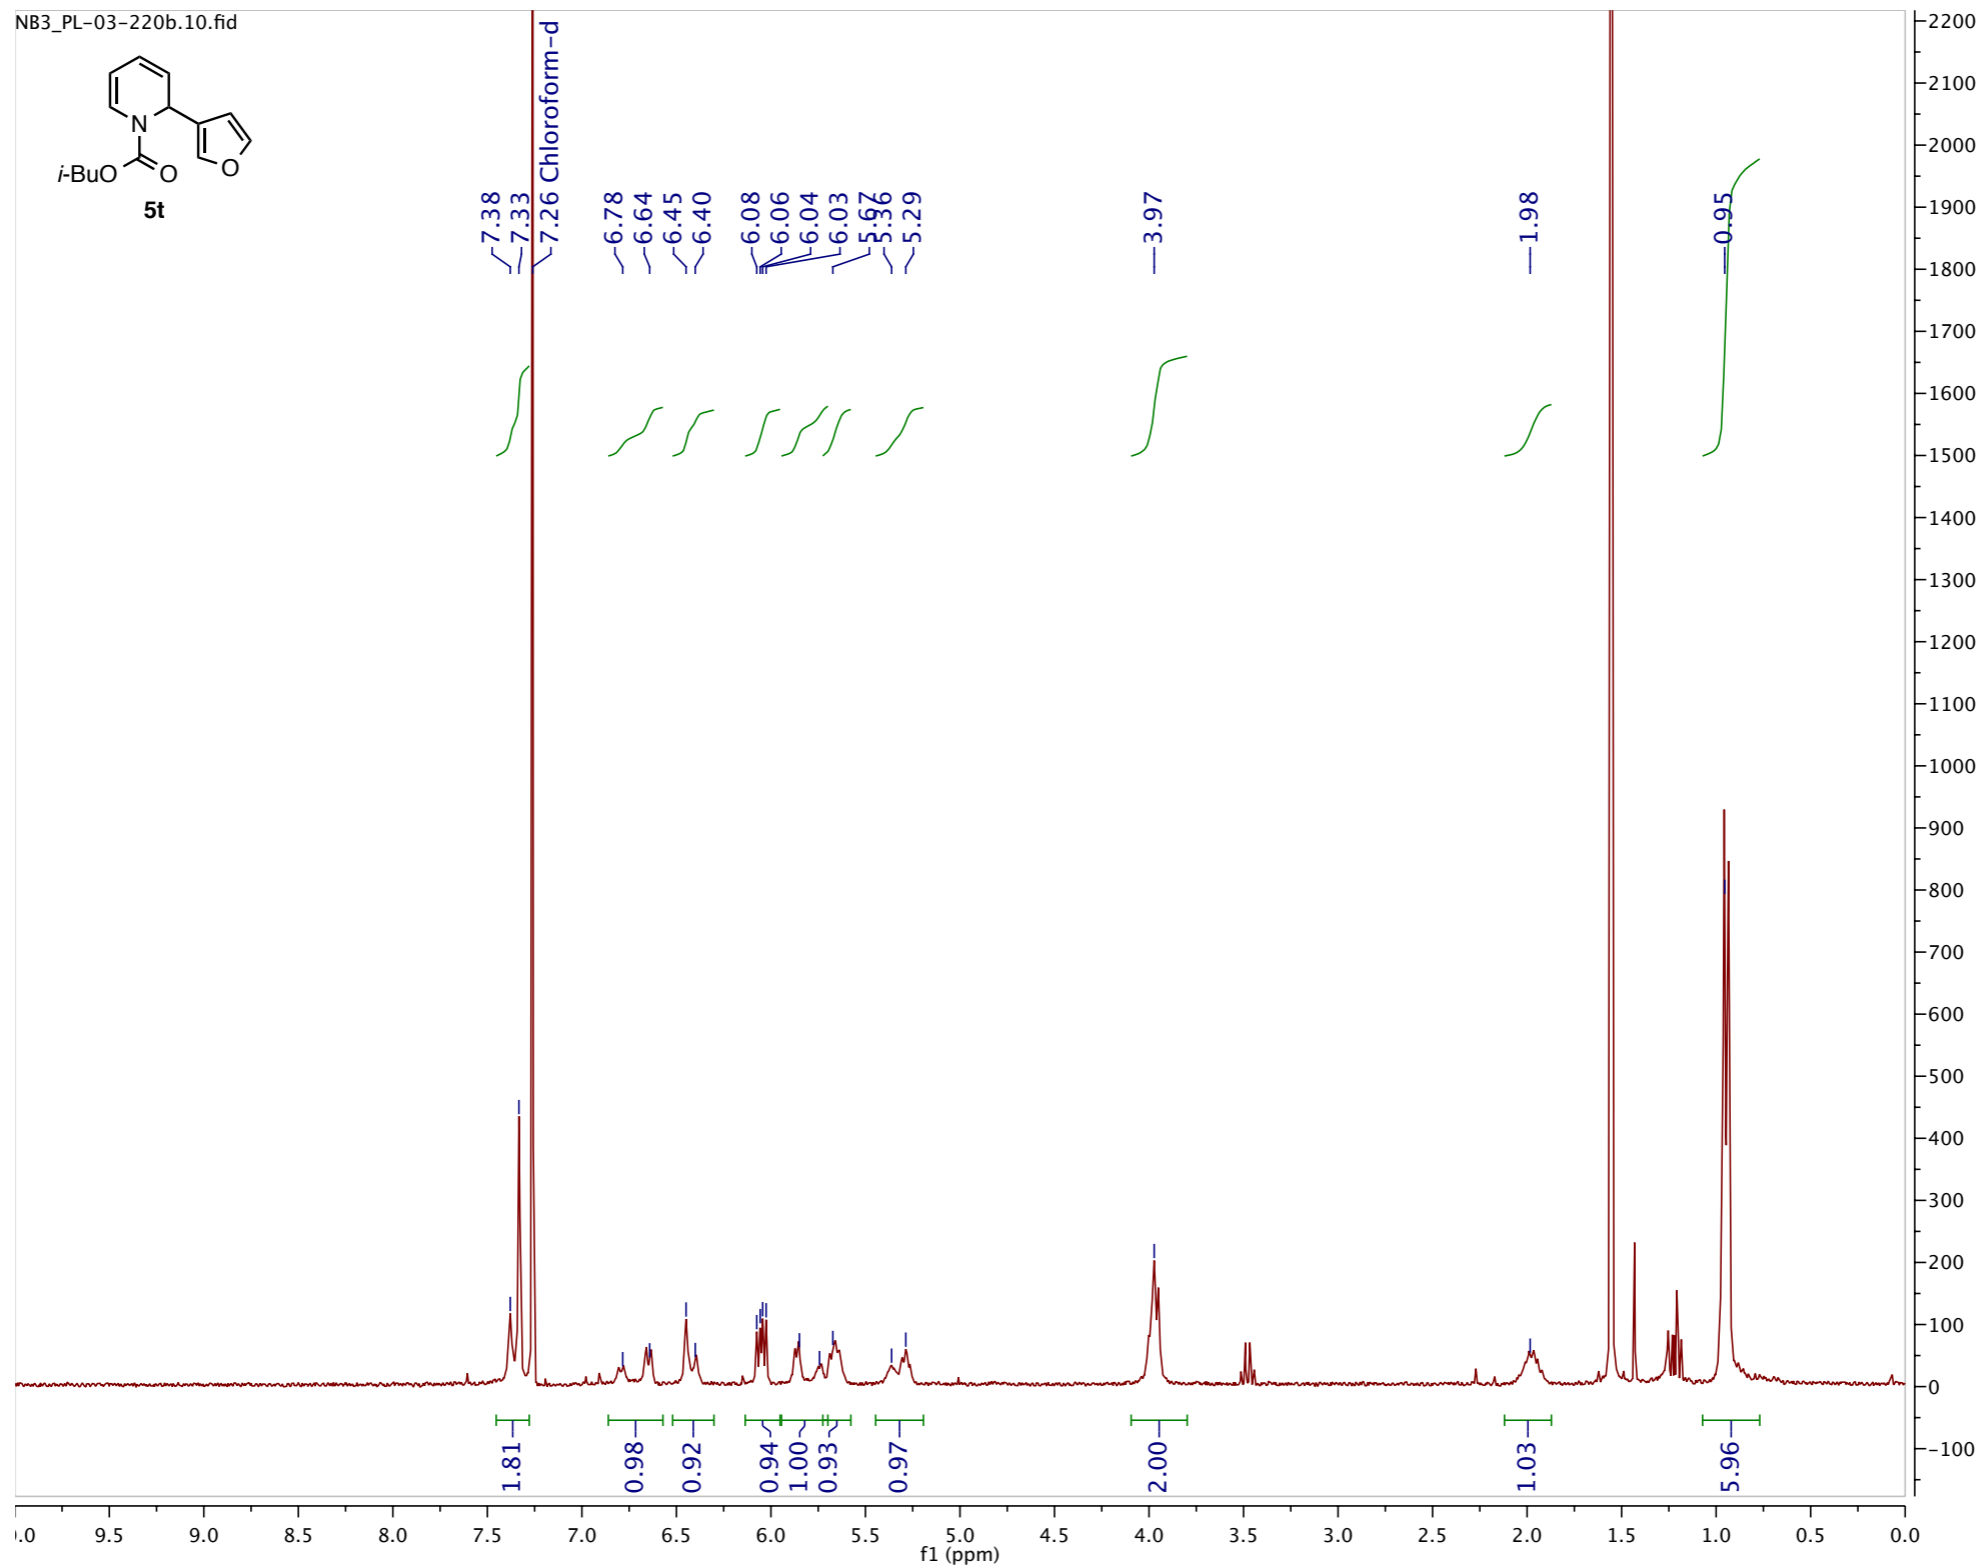

300 MHz <sup>1</sup>H-NMR spectrum of **5t** in CDCl<sub>3</sub>



A2\_87-PL-05-261\_carbon.10.fid  
C13CPDp1.PU CDCl3 /opt/topspin3.0 jlutz 87

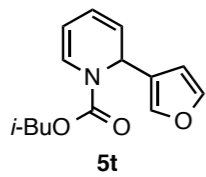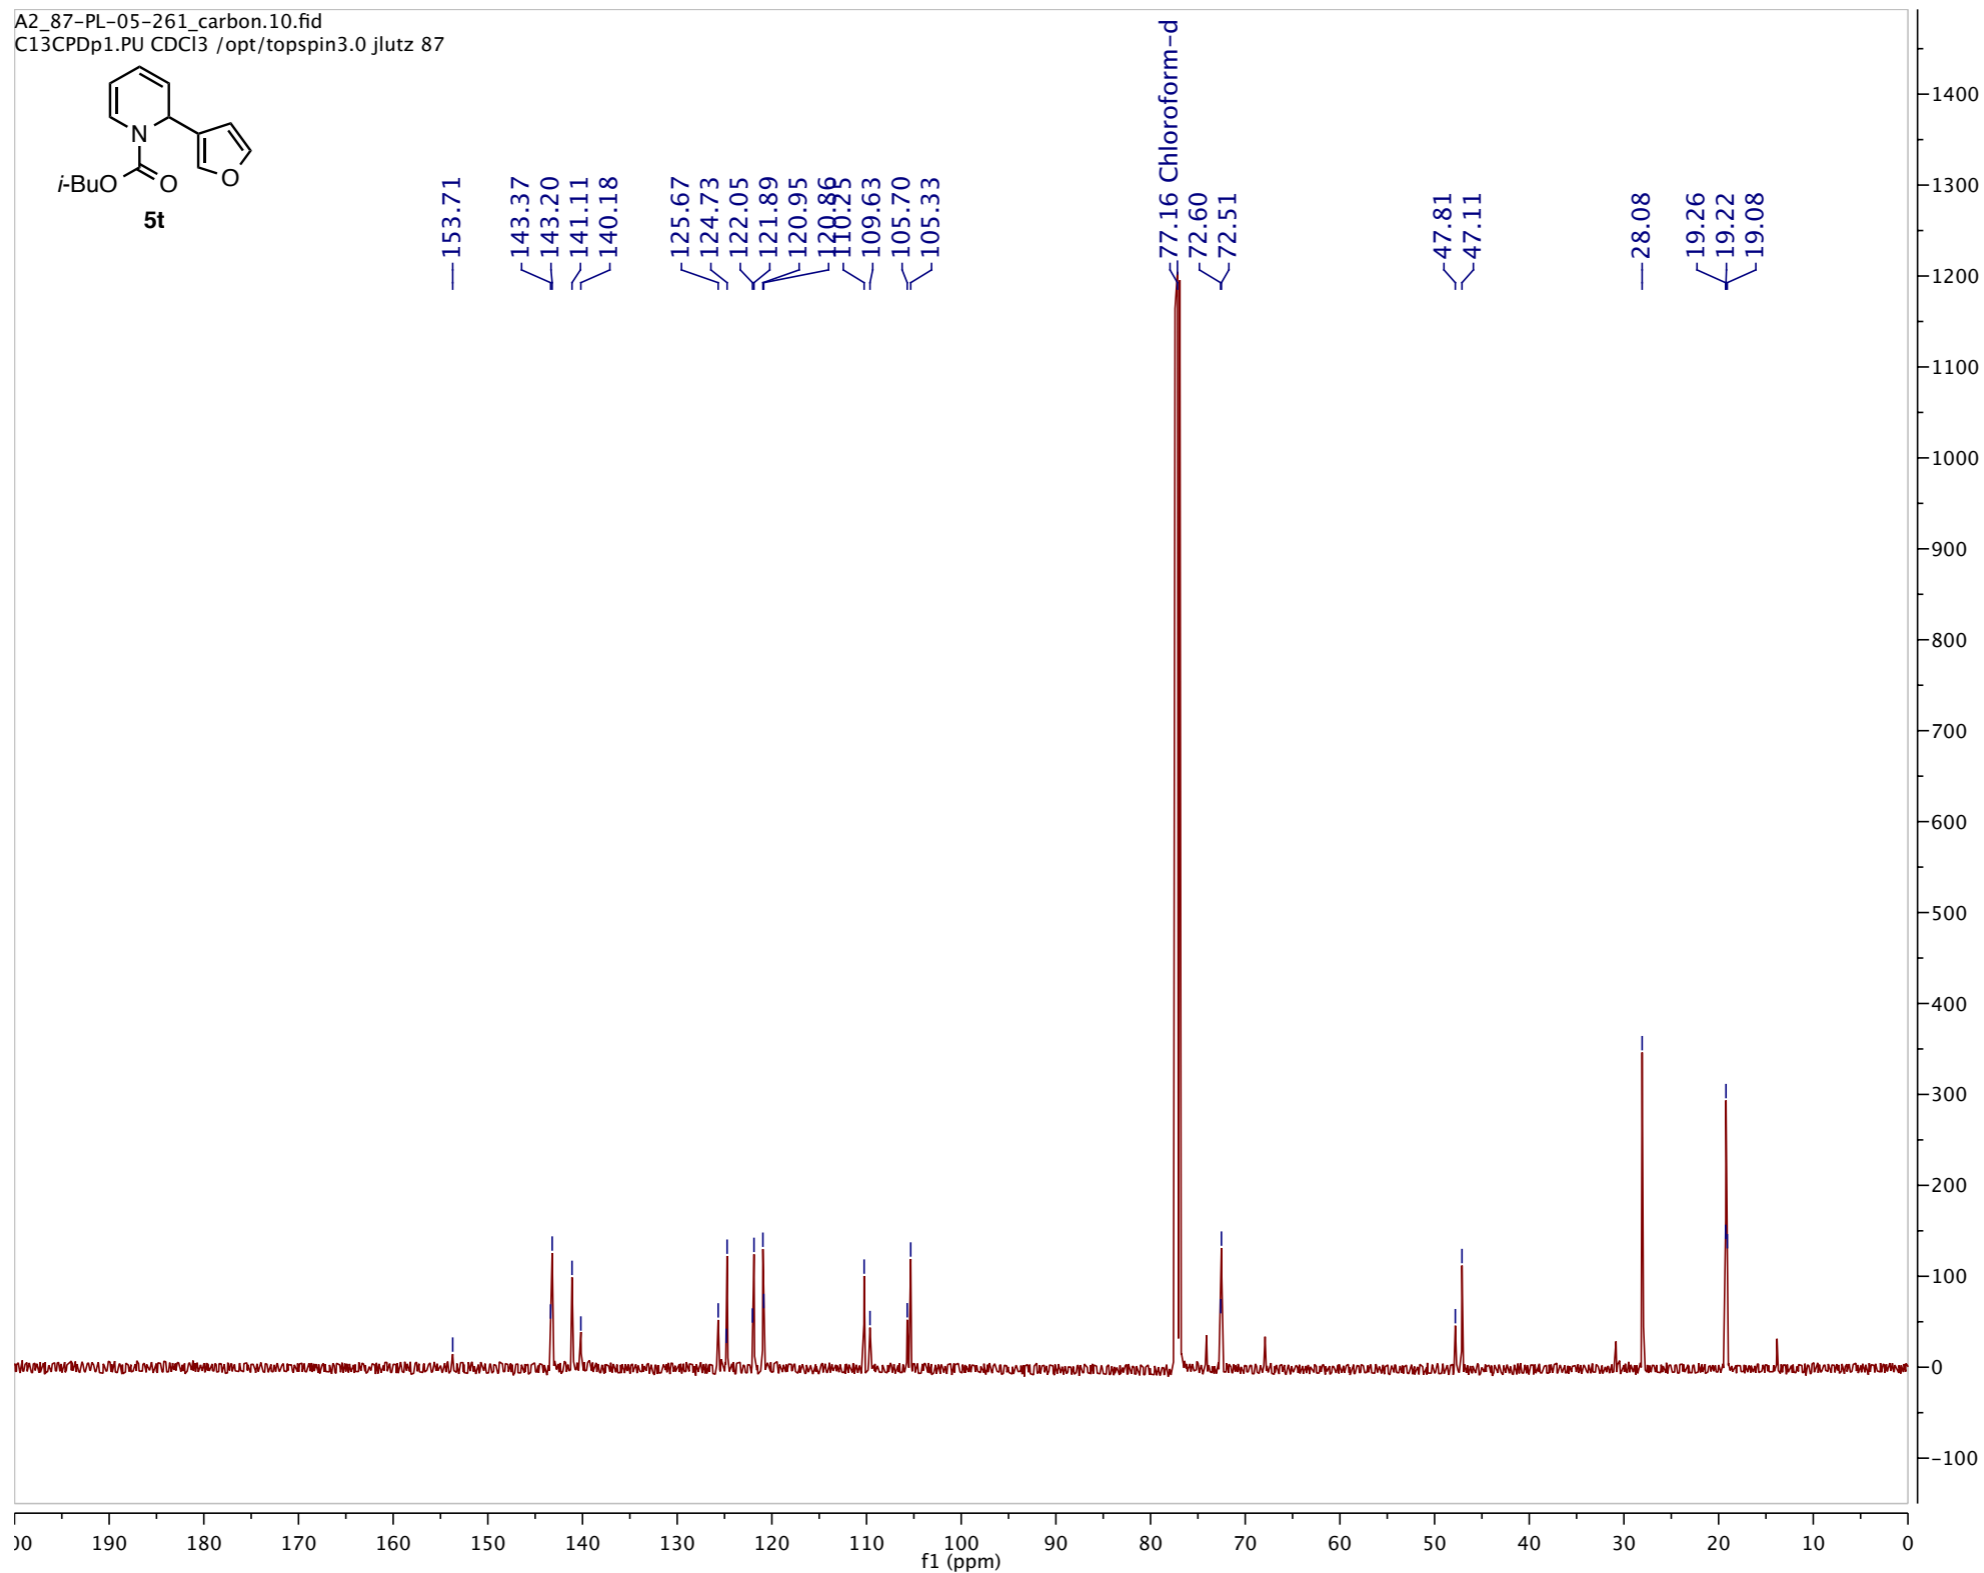

125 MHz <sup>13</sup>C-NMR spectrum of **5t** in CDCl<sub>3</sub>

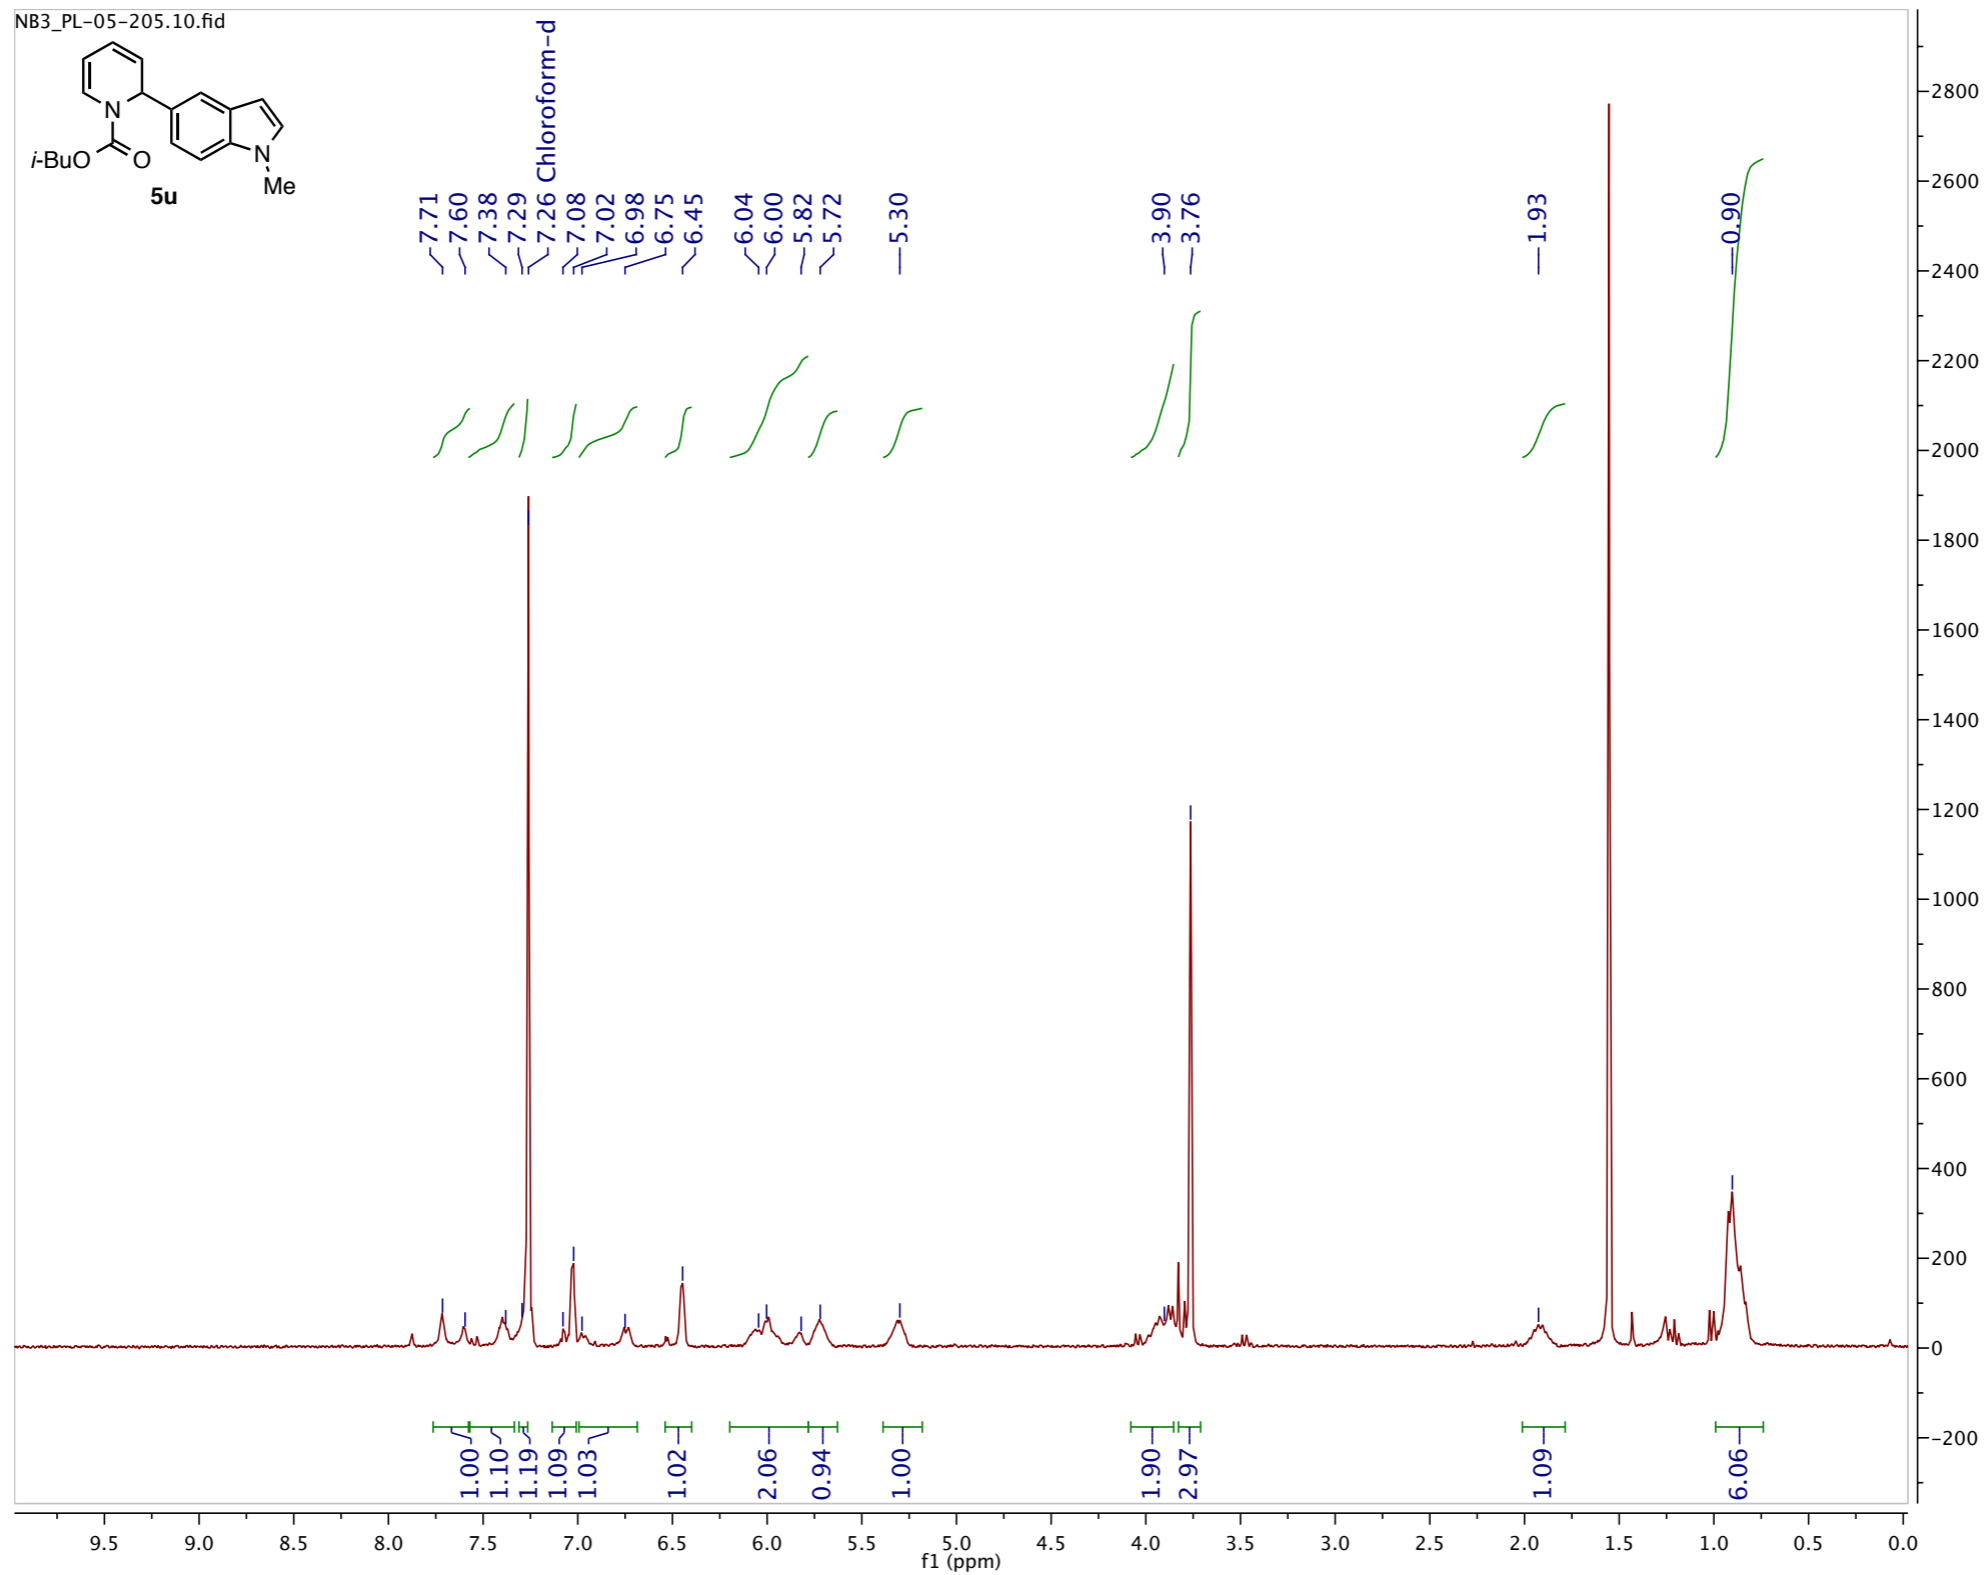

300 MHz  $^1\text{H}$ -NMR spectrum of **5u** in  $\text{CDCl}_3$

A2\_29-PL-05-247u\_redo\_prep\_carbon.10.fid  
C13CPDp1.PU CDCl3 /opt/topspin3.0 jlutz 29

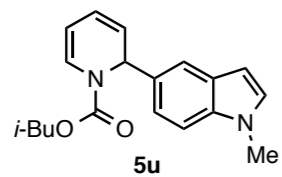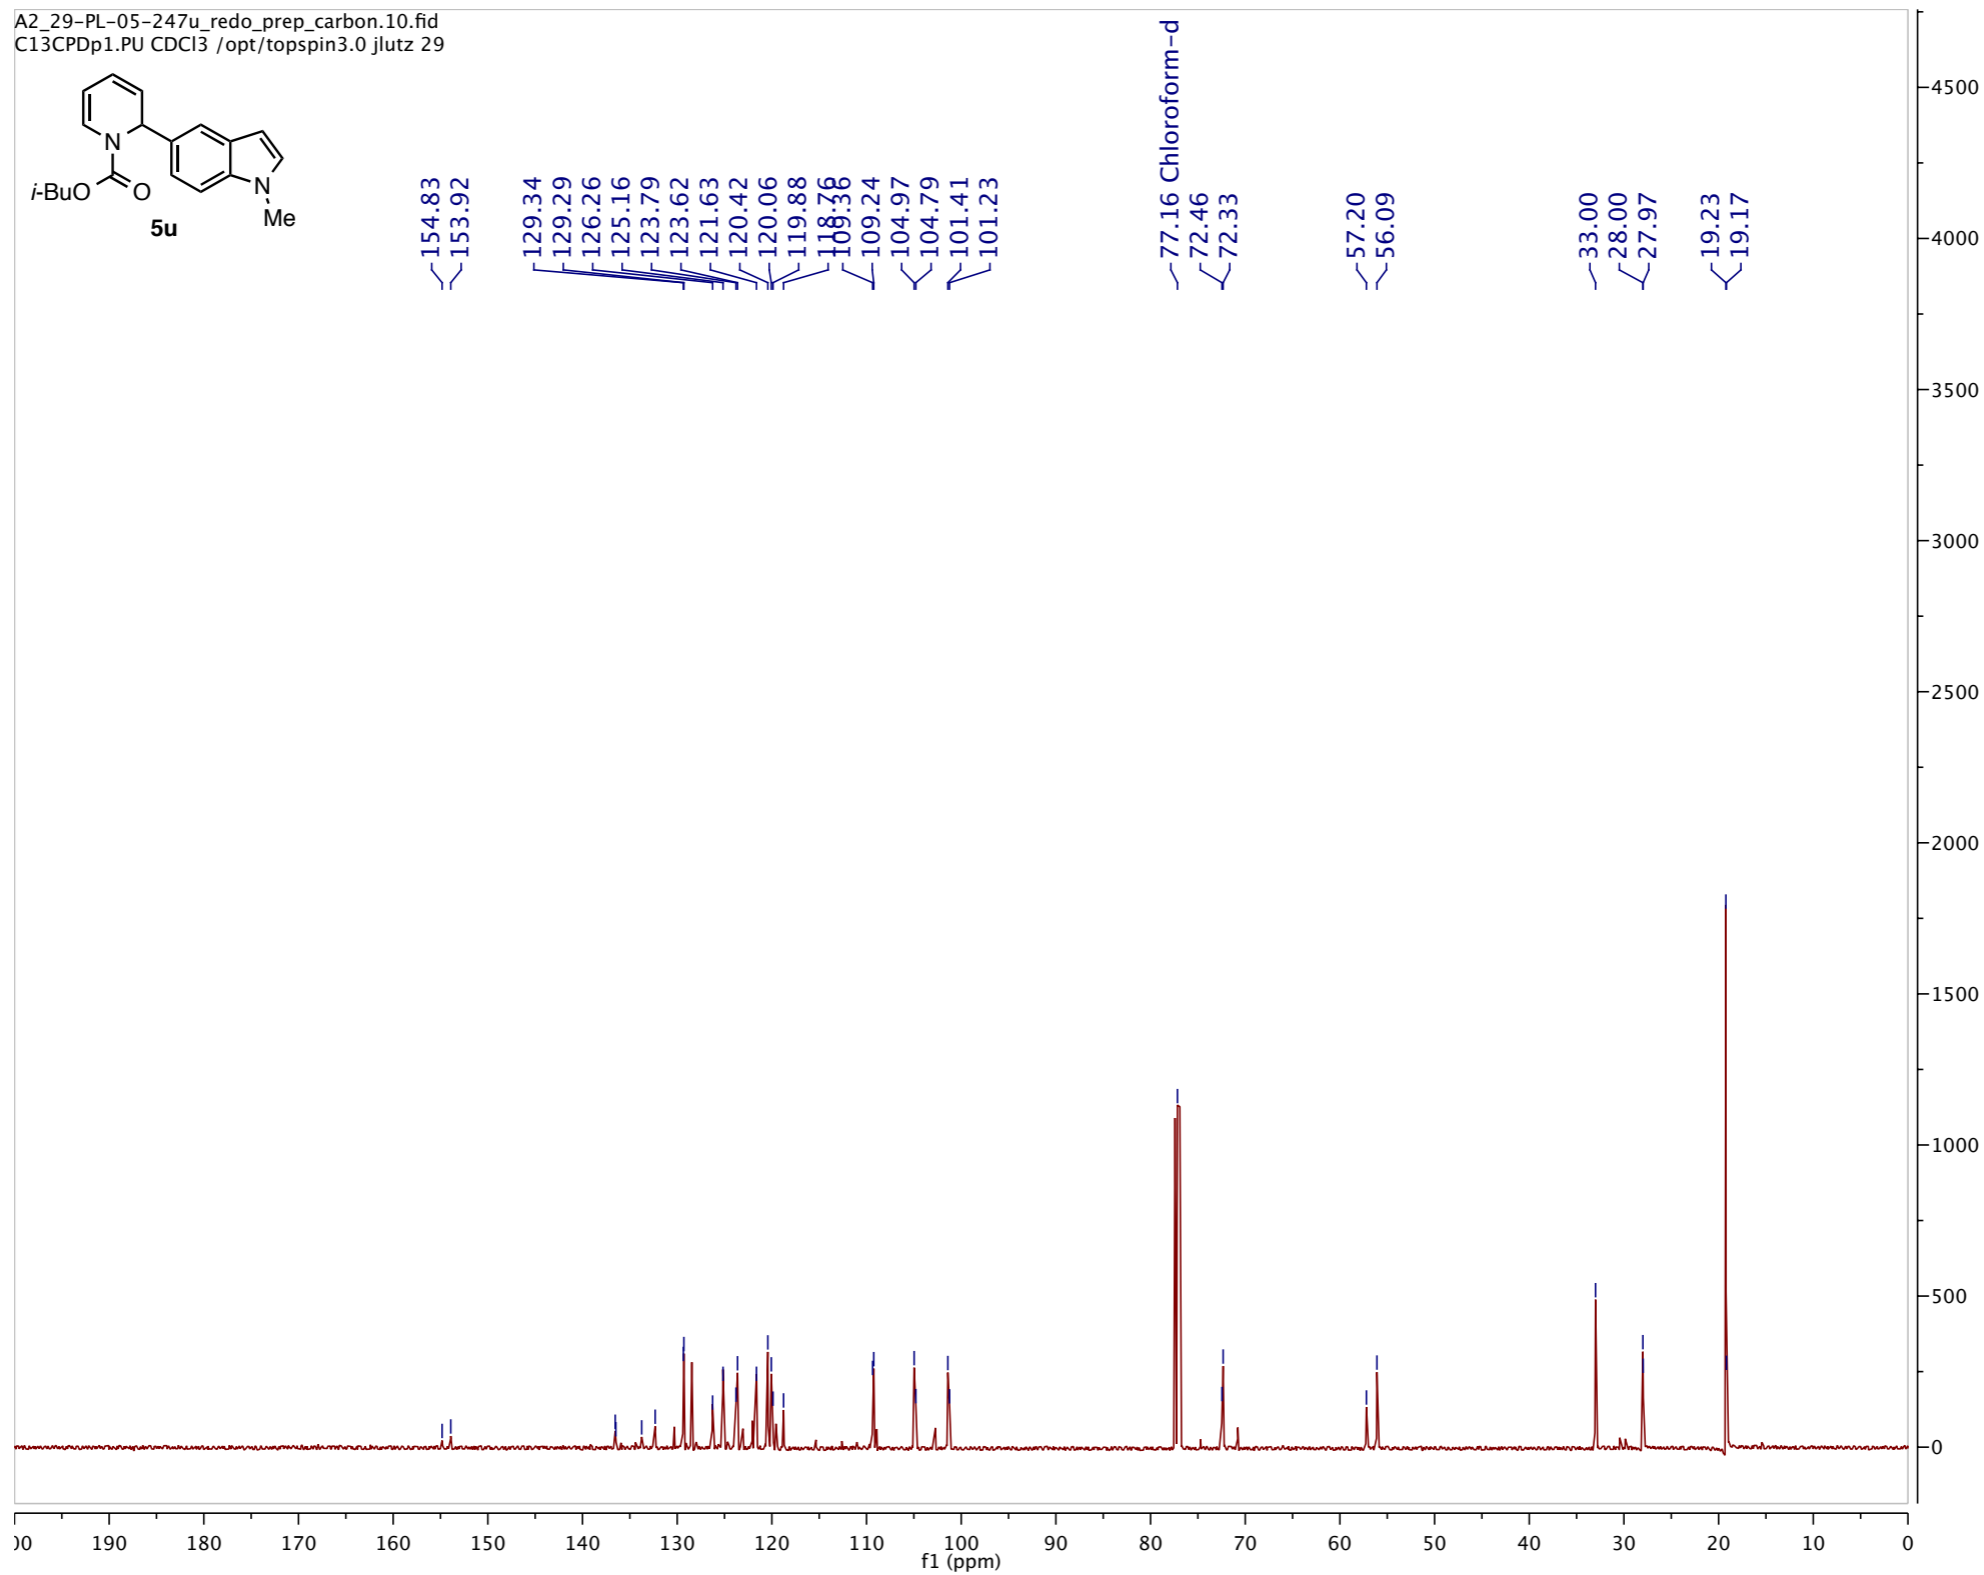

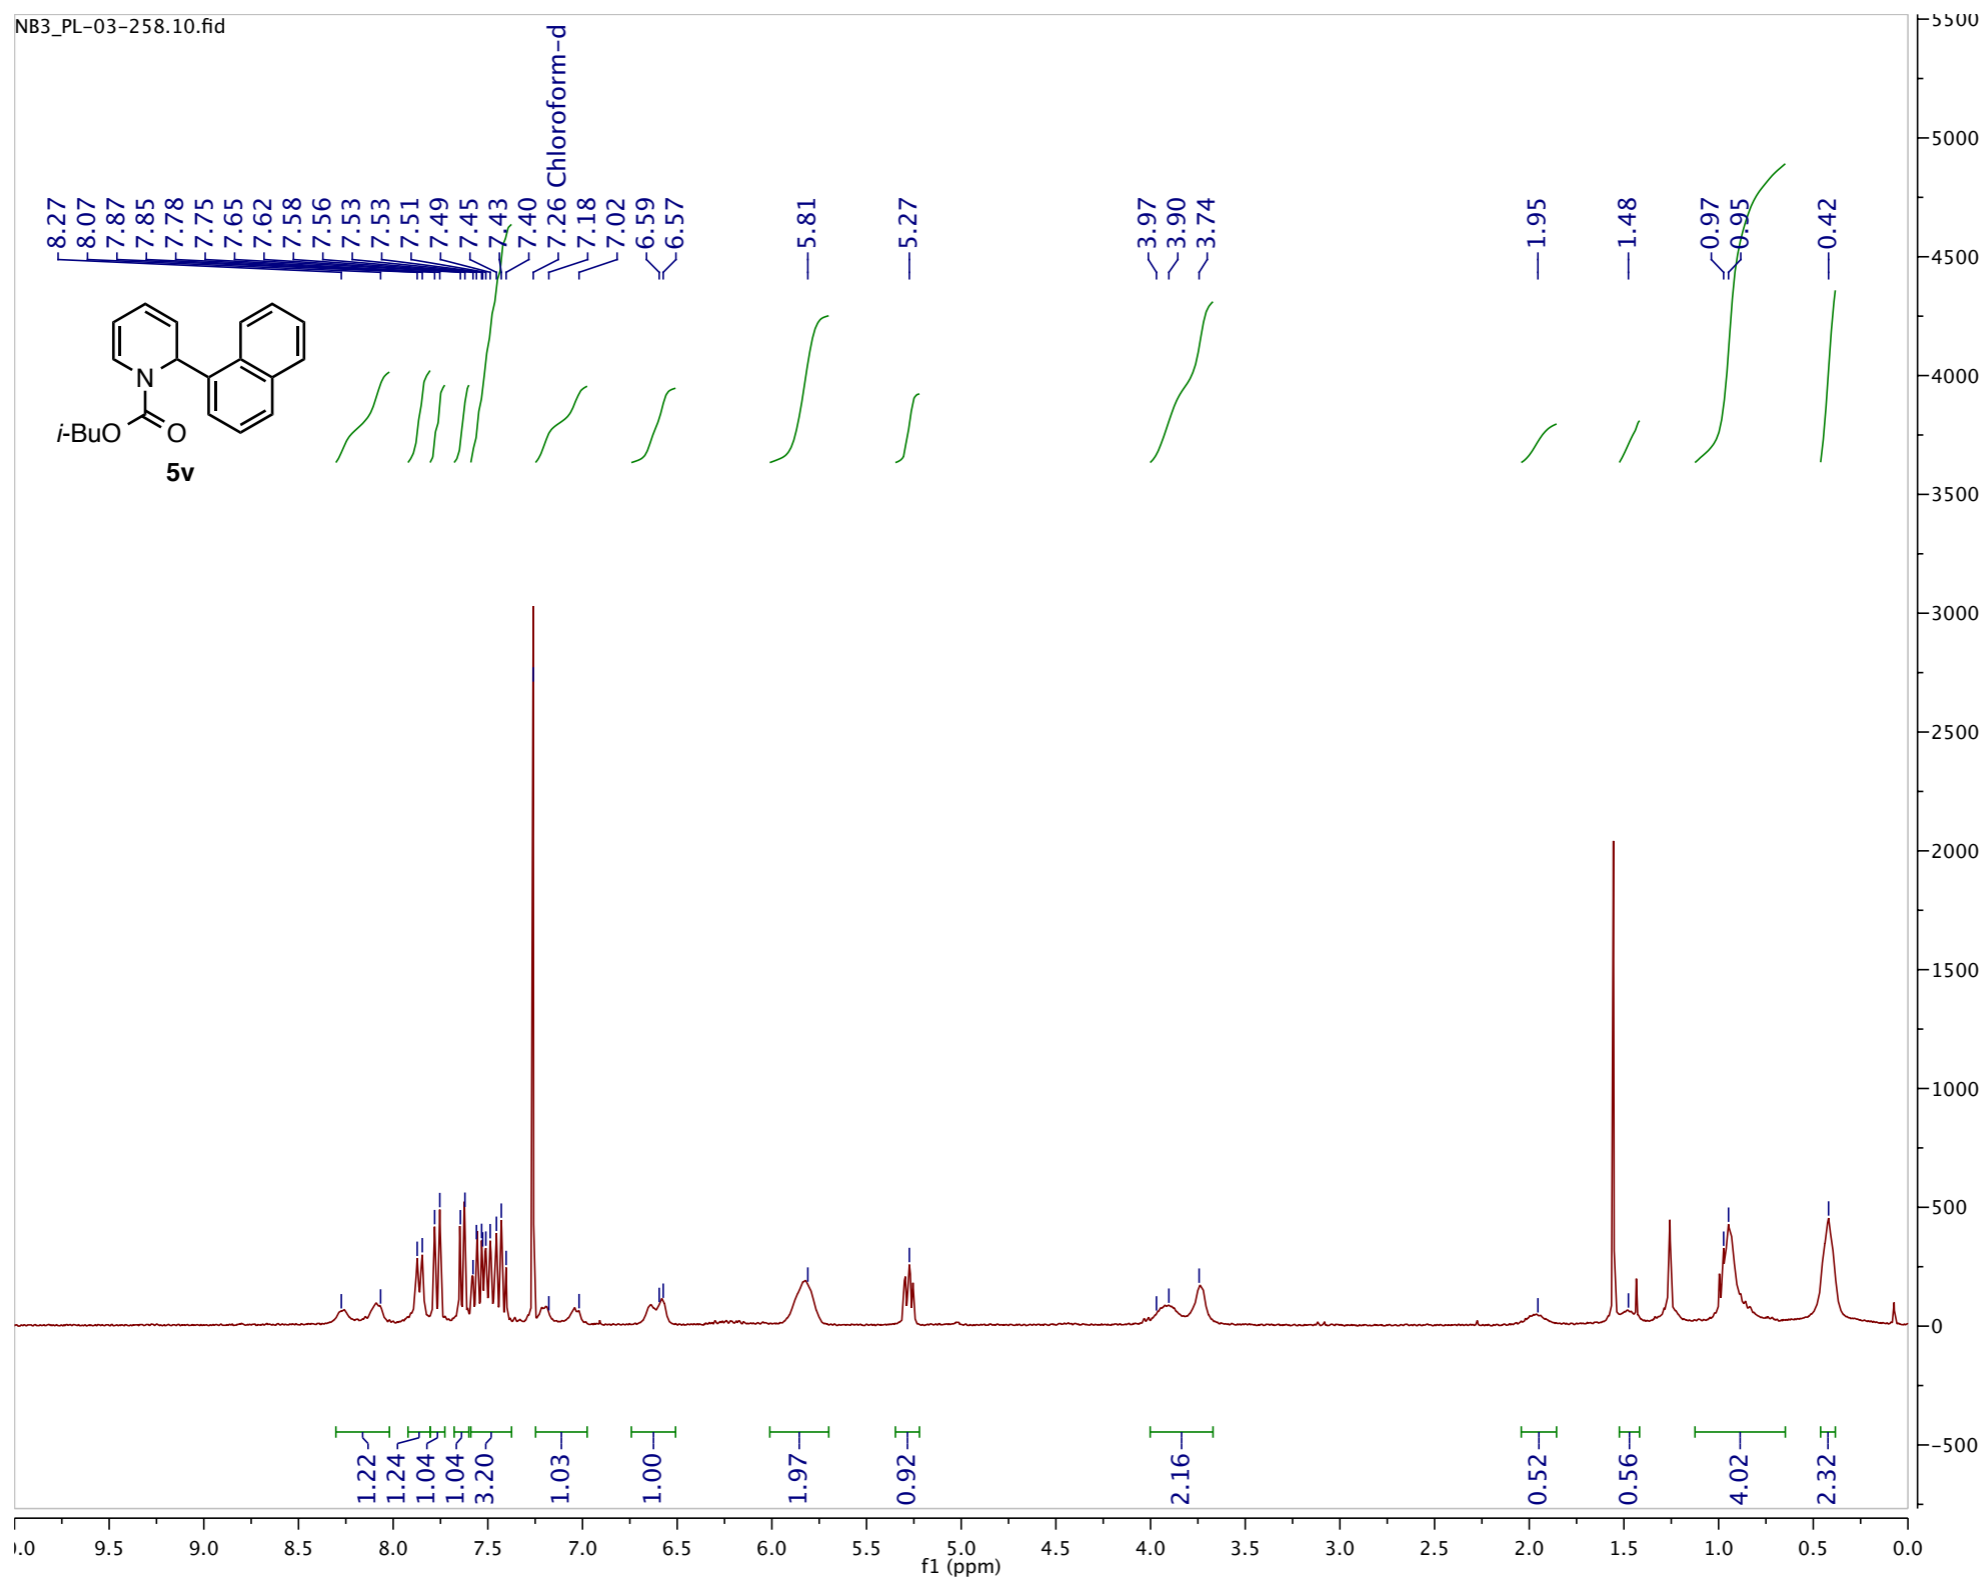

300 MHz <sup>1</sup>H-NMR spectrum of **5v** in CDCl<sub>3</sub>

A2\_46-PL-05-247v redo\_prep\_carbon.10.fid  
C13CPDp1.PU CDCl3 /opt/topspin3.0 jlutz 46

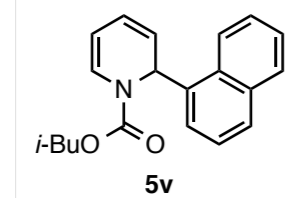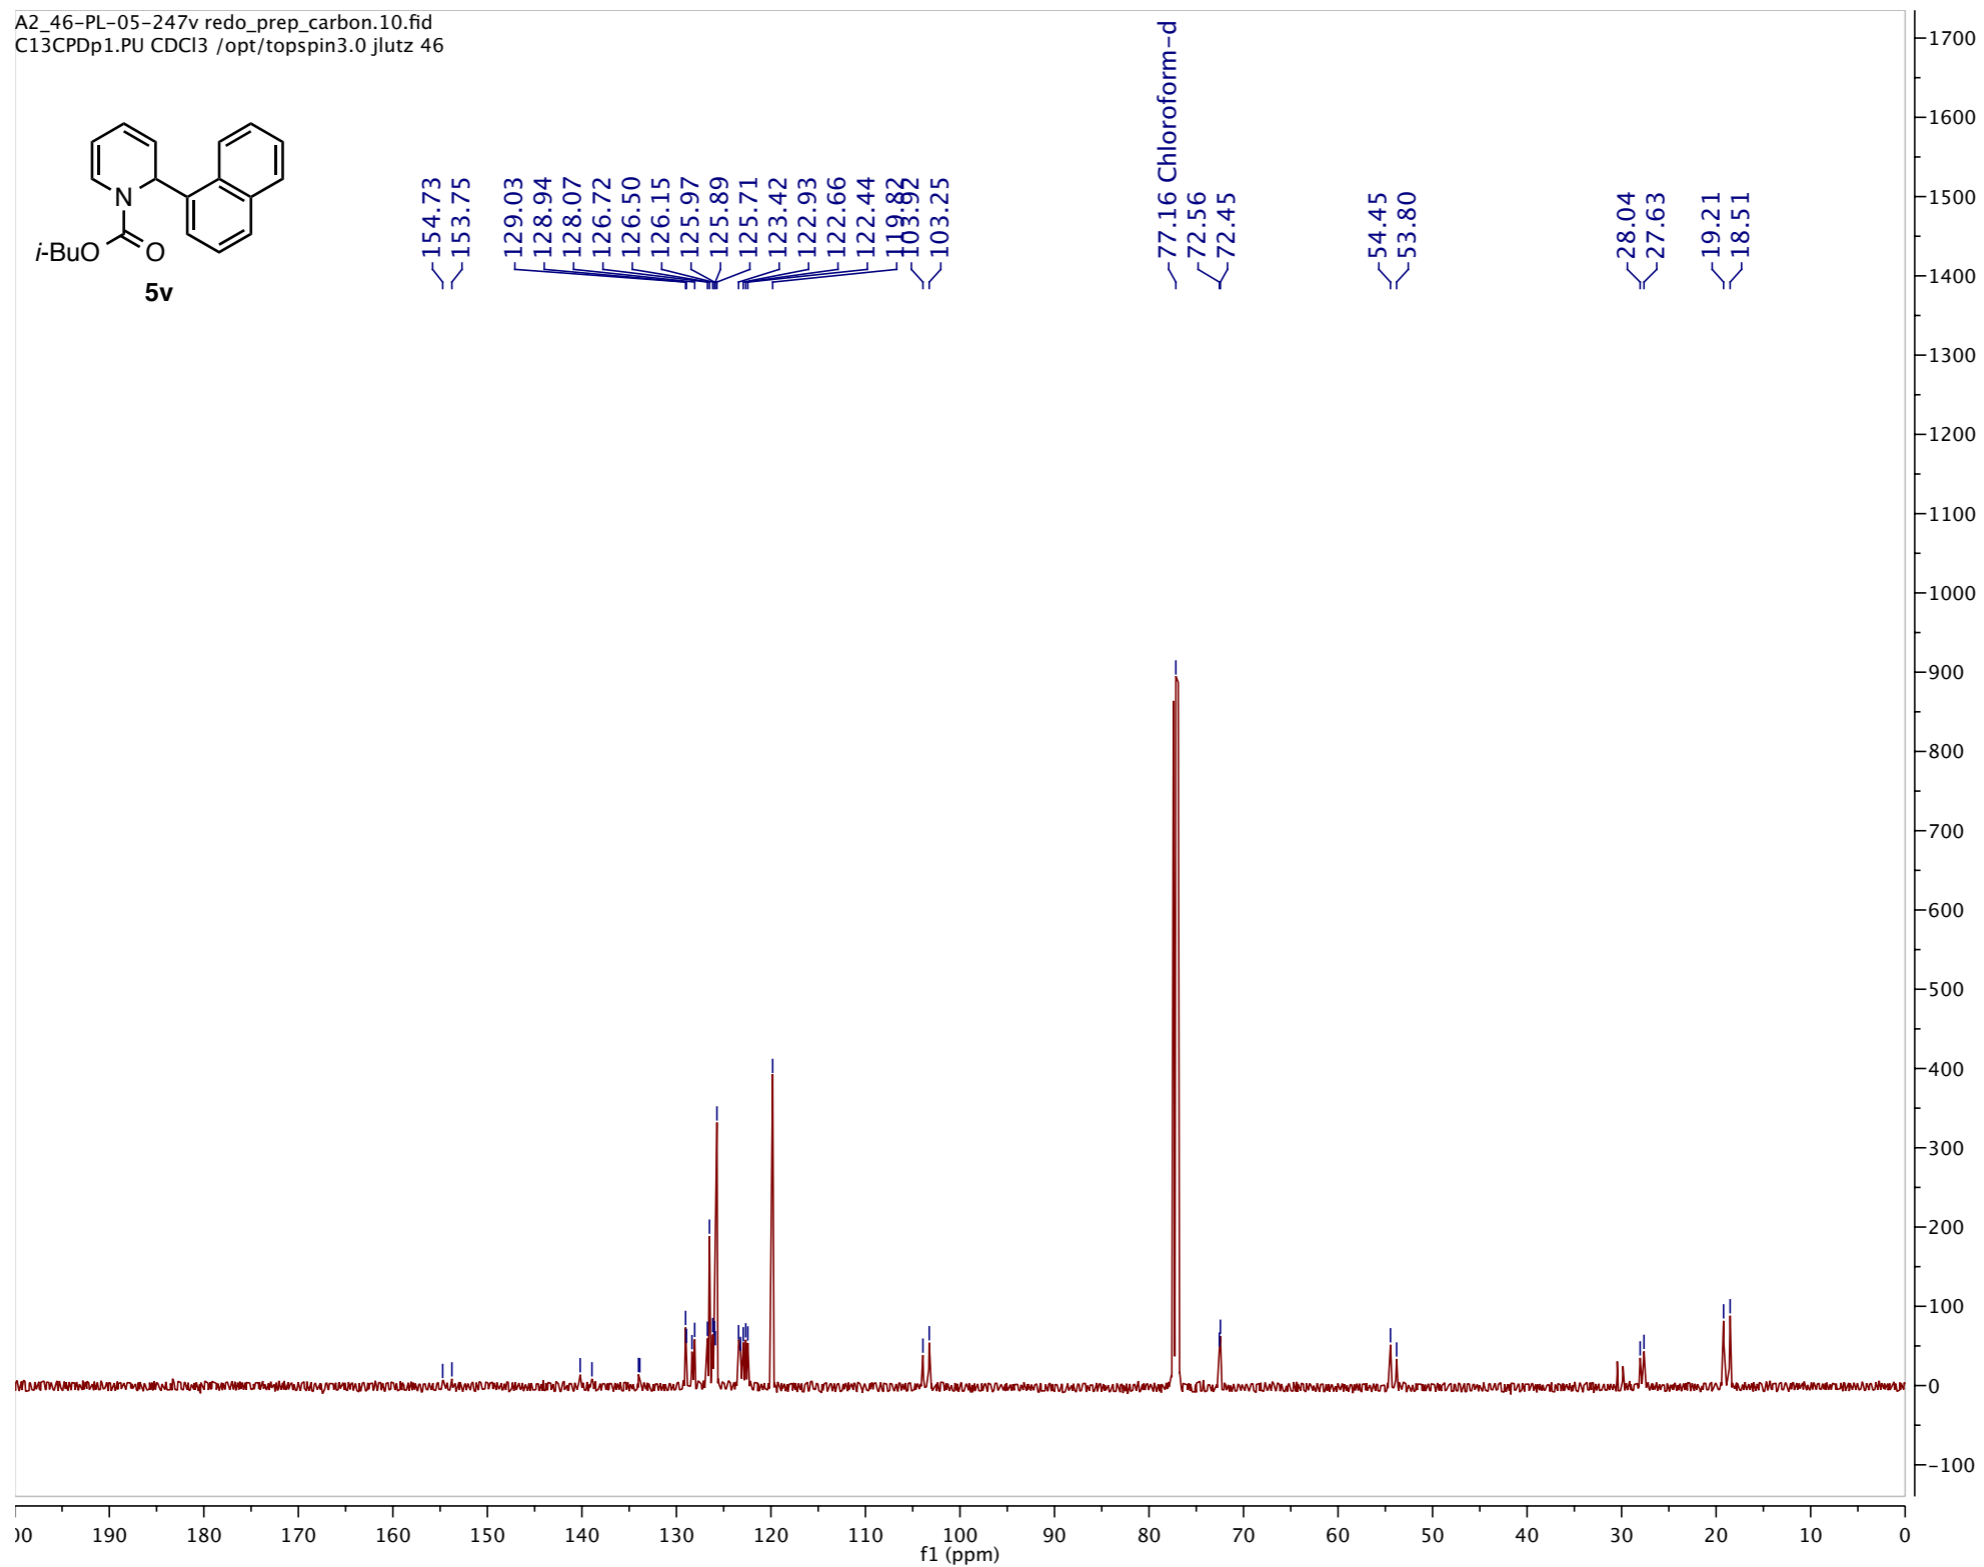

125 MHz <sup>13</sup>C-NMR spectrum of **5v** in CDCl<sub>3</sub>

NB3\_PL-05-152\_red.10.fid

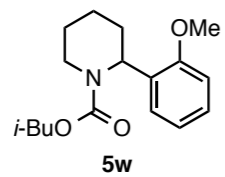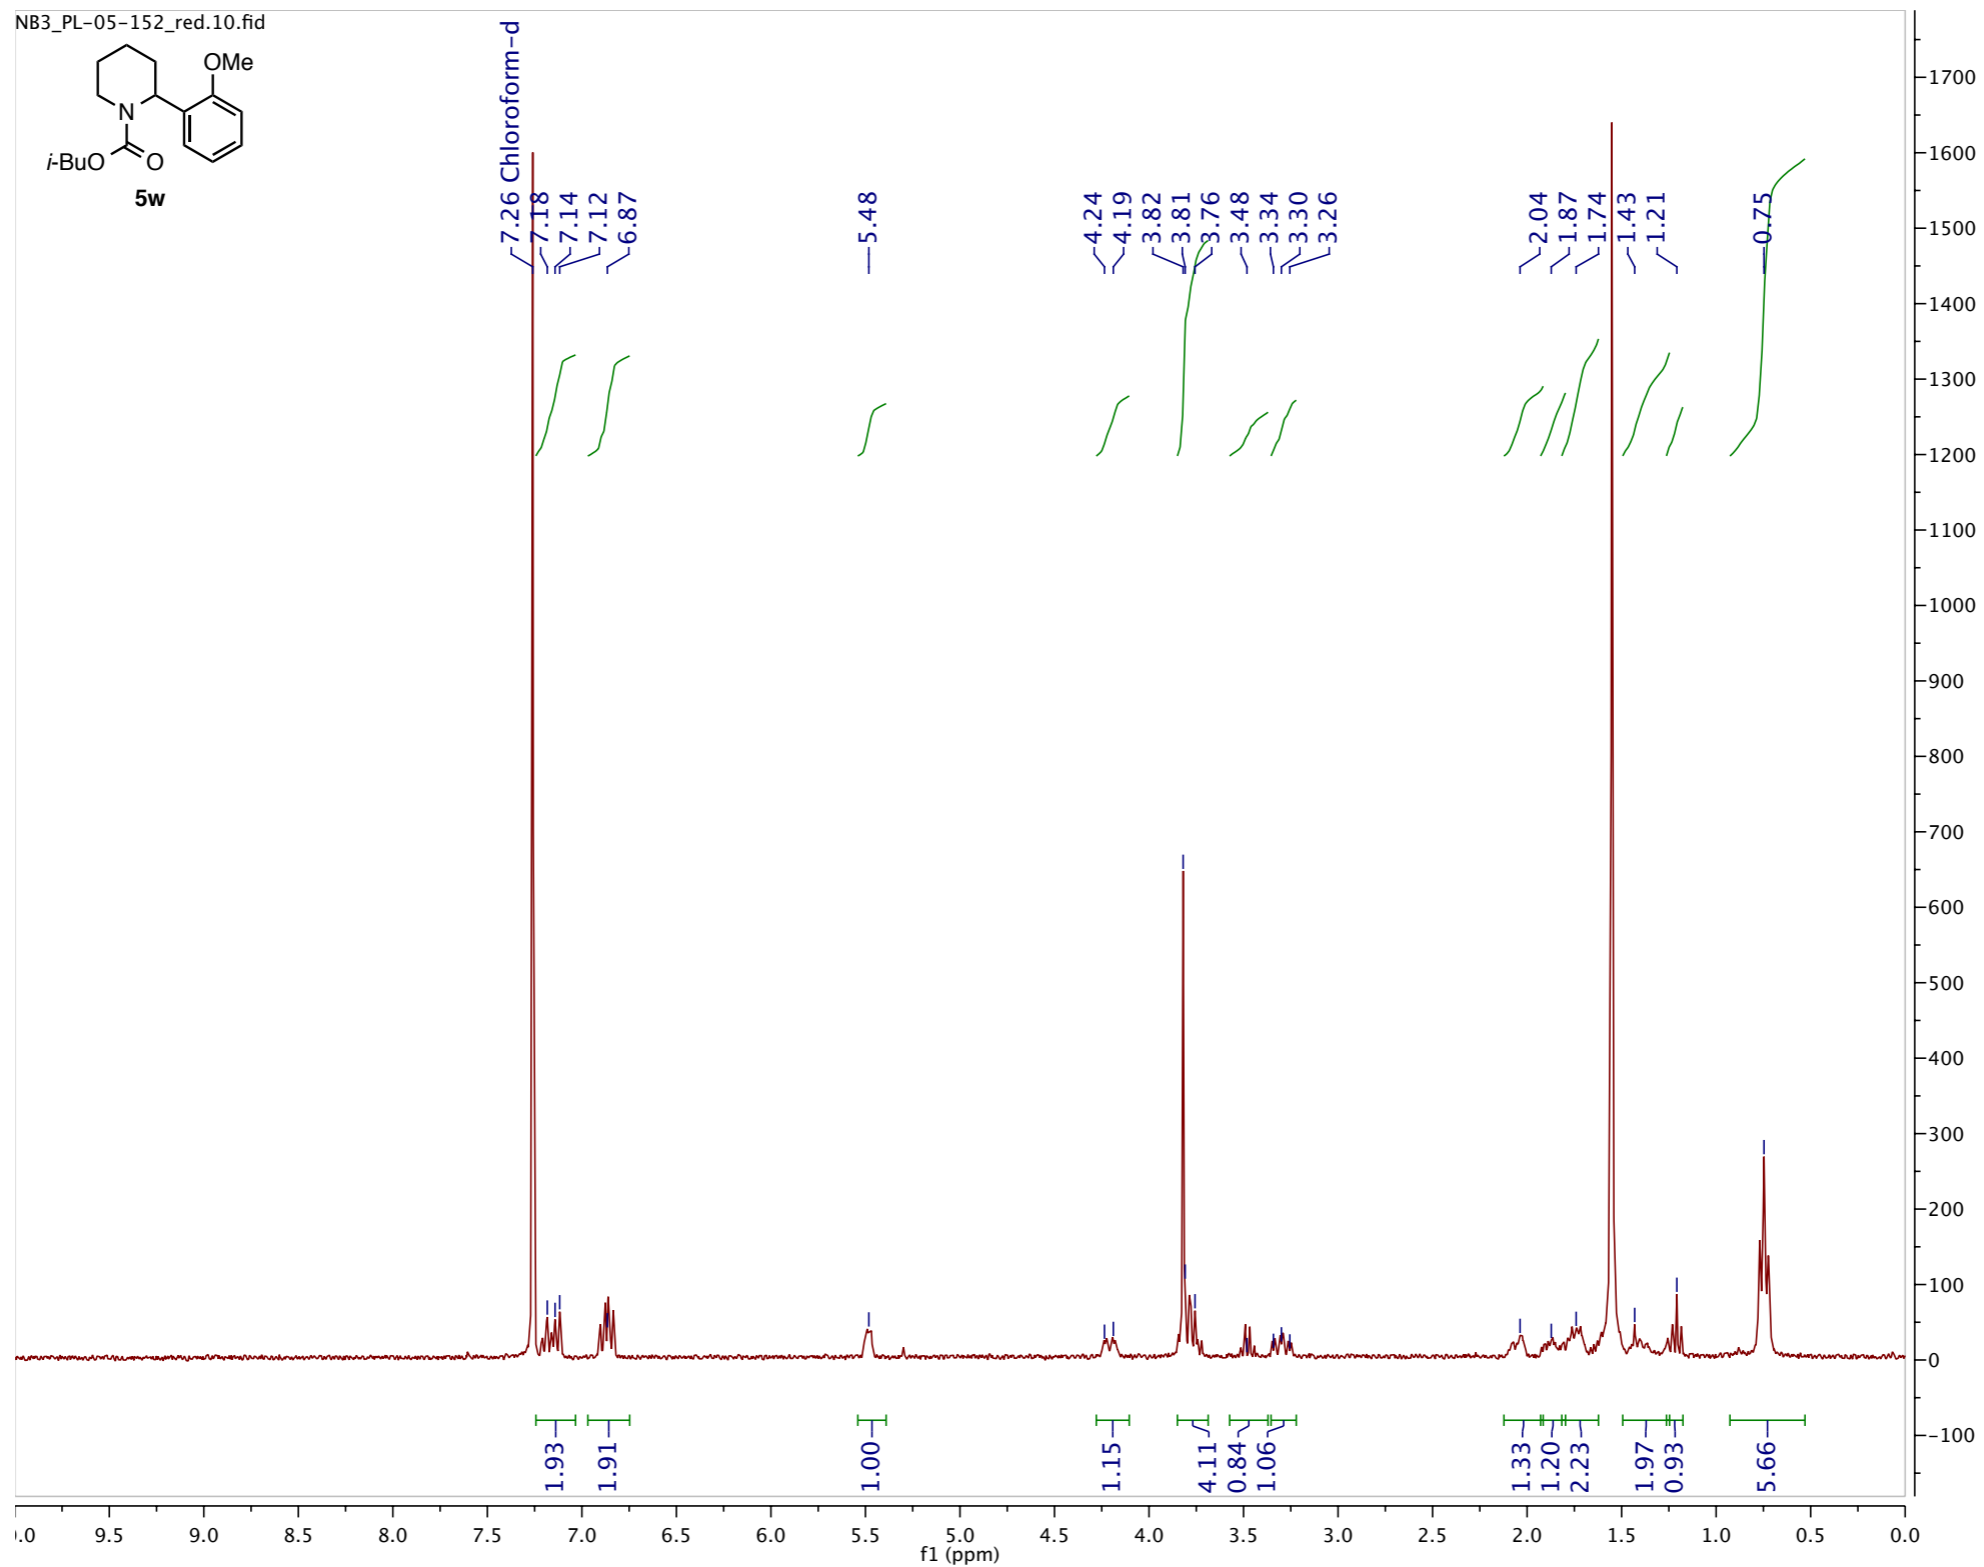

A2\_56-PL-05-152\_carbon.10.fid  
C13CPDp1.PU CDCl3 /opt/topspin3.0 jlutz 56

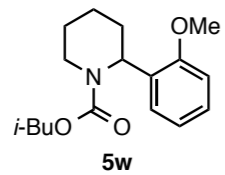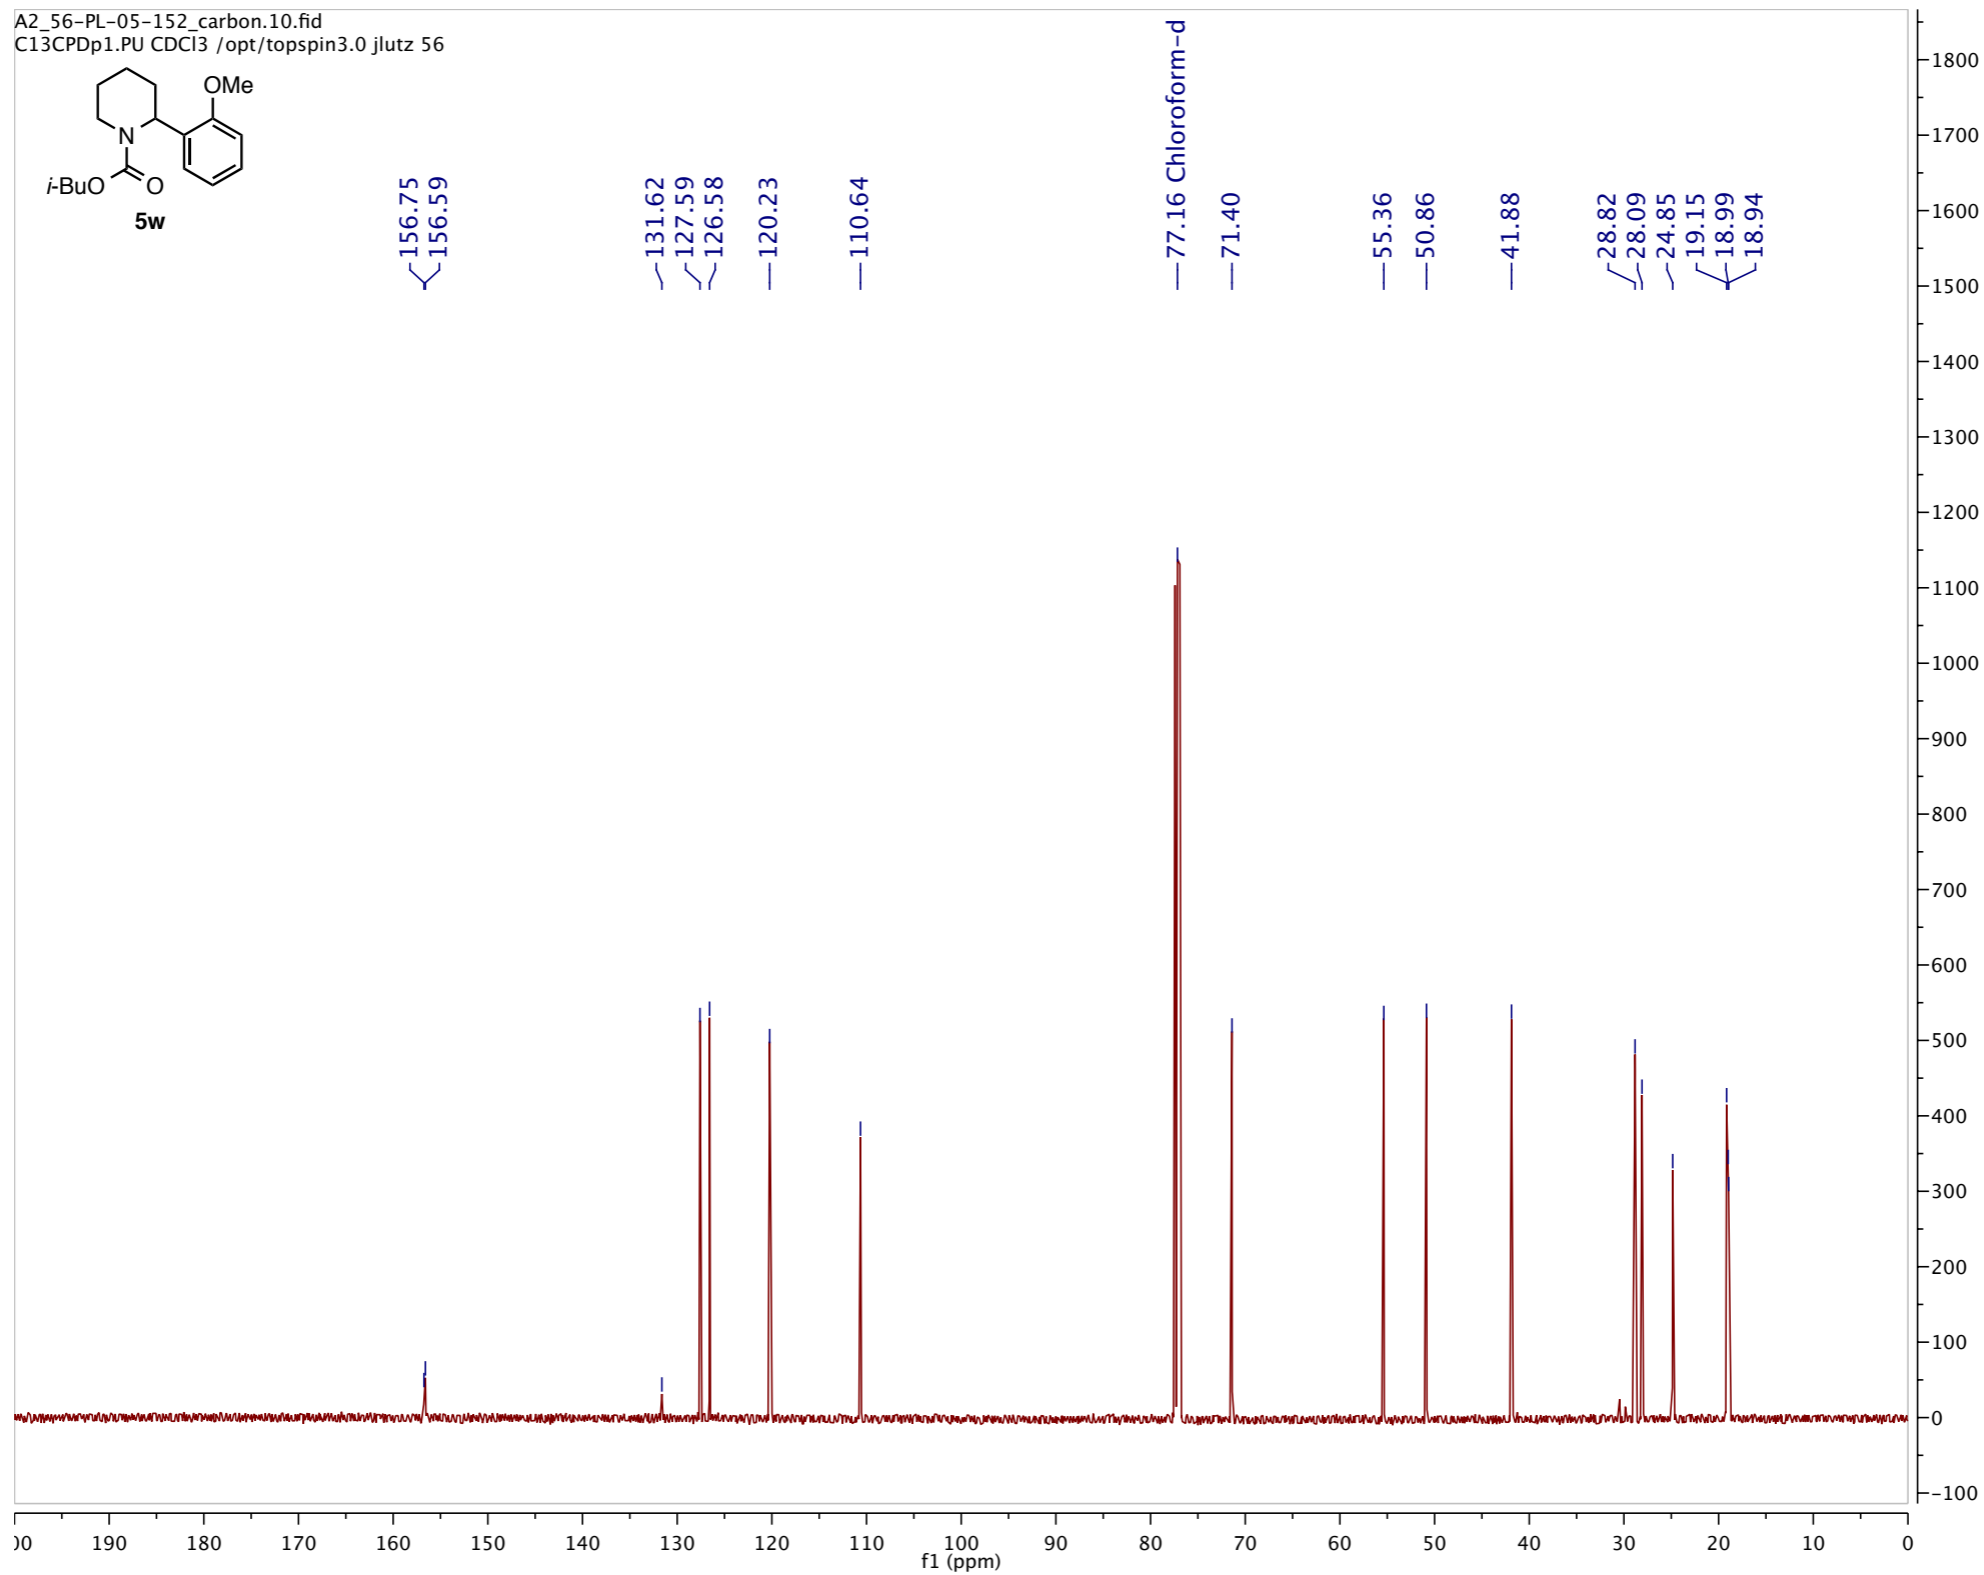

NB3\_PL-05-090.10.fid

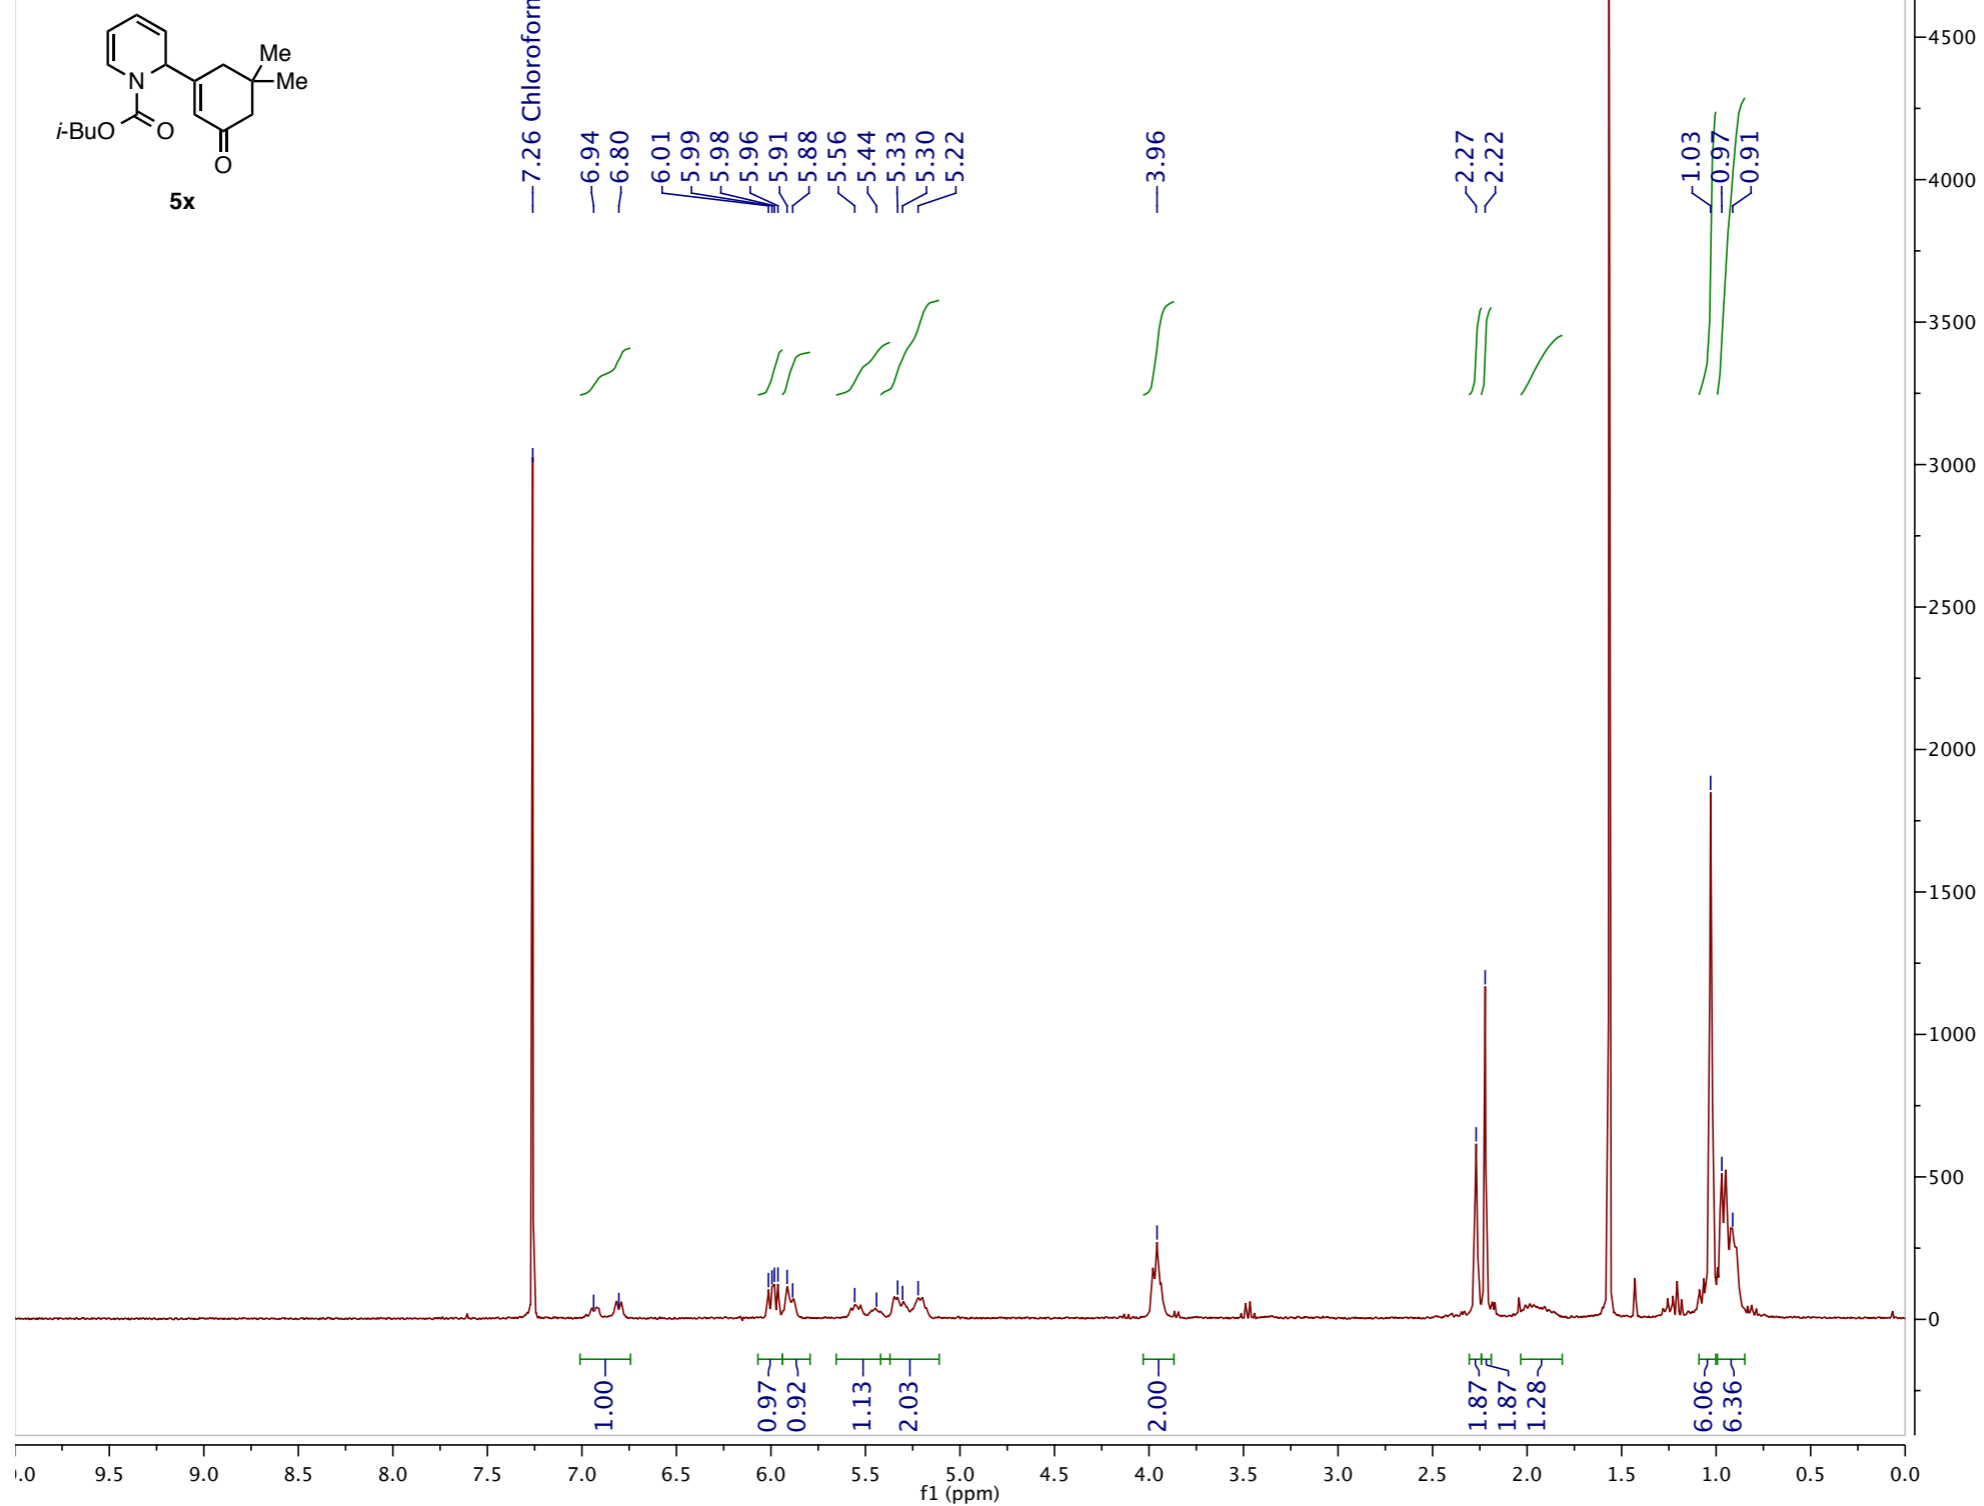



A2\_54-PL-05-247x\_carbon.11.fid  
C13CPDp1.PU CDCl3 /opt/topspin3.0 jlutz 54

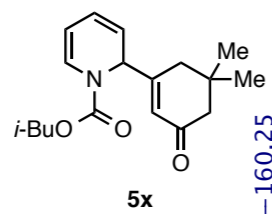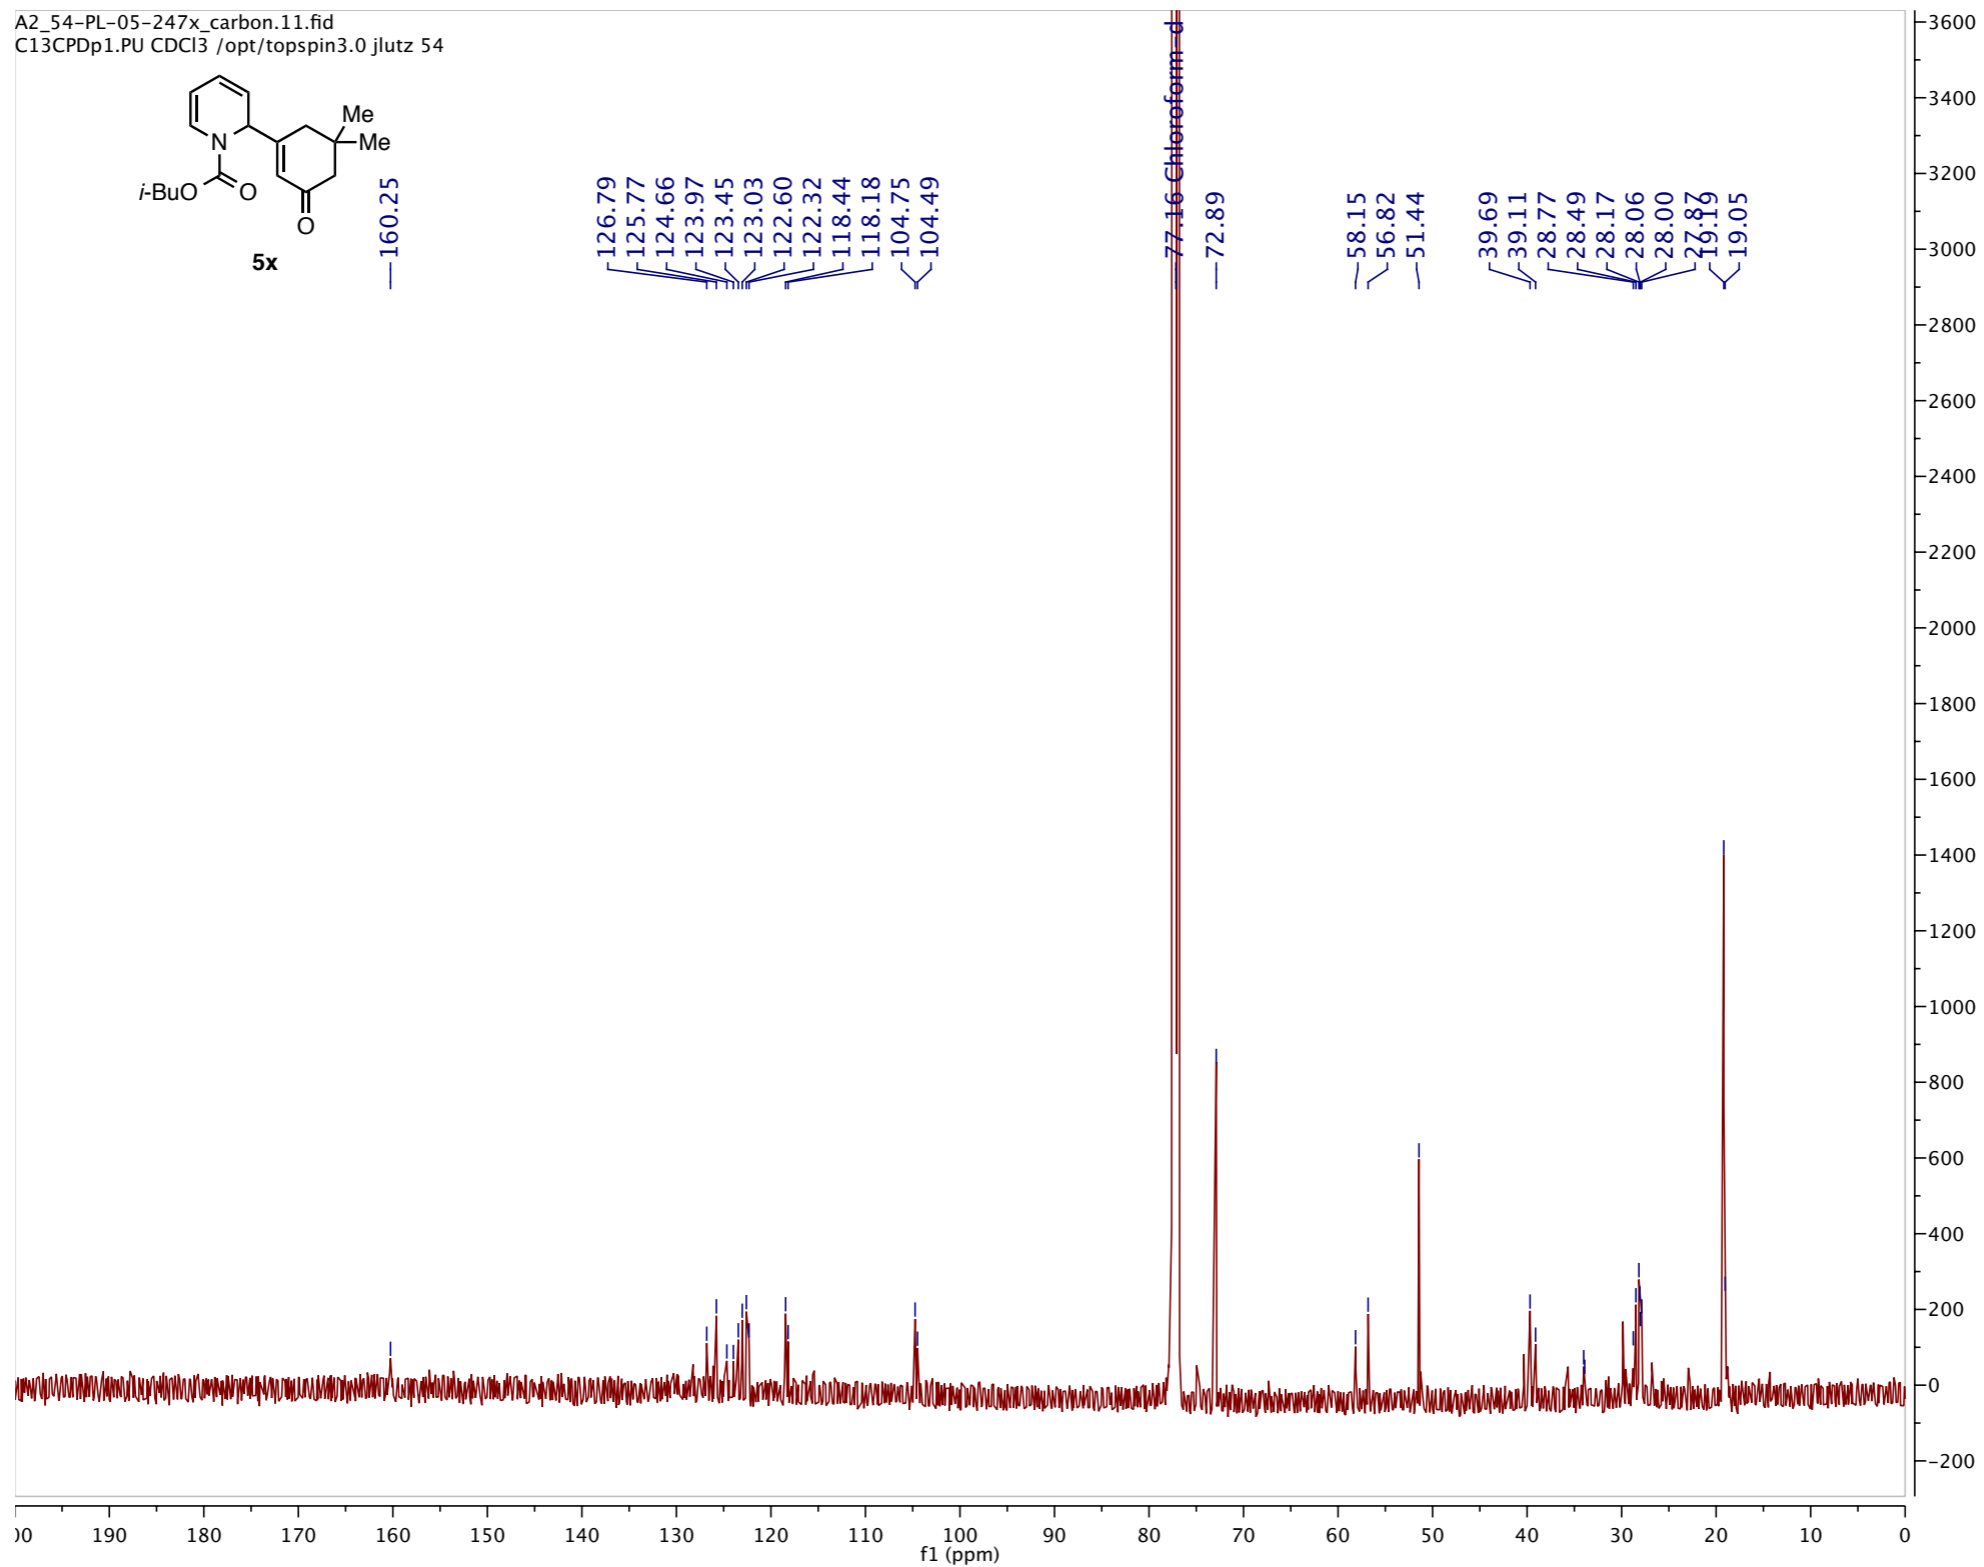

NB3\_PL-05-243.11.fid

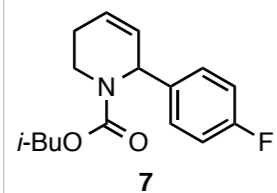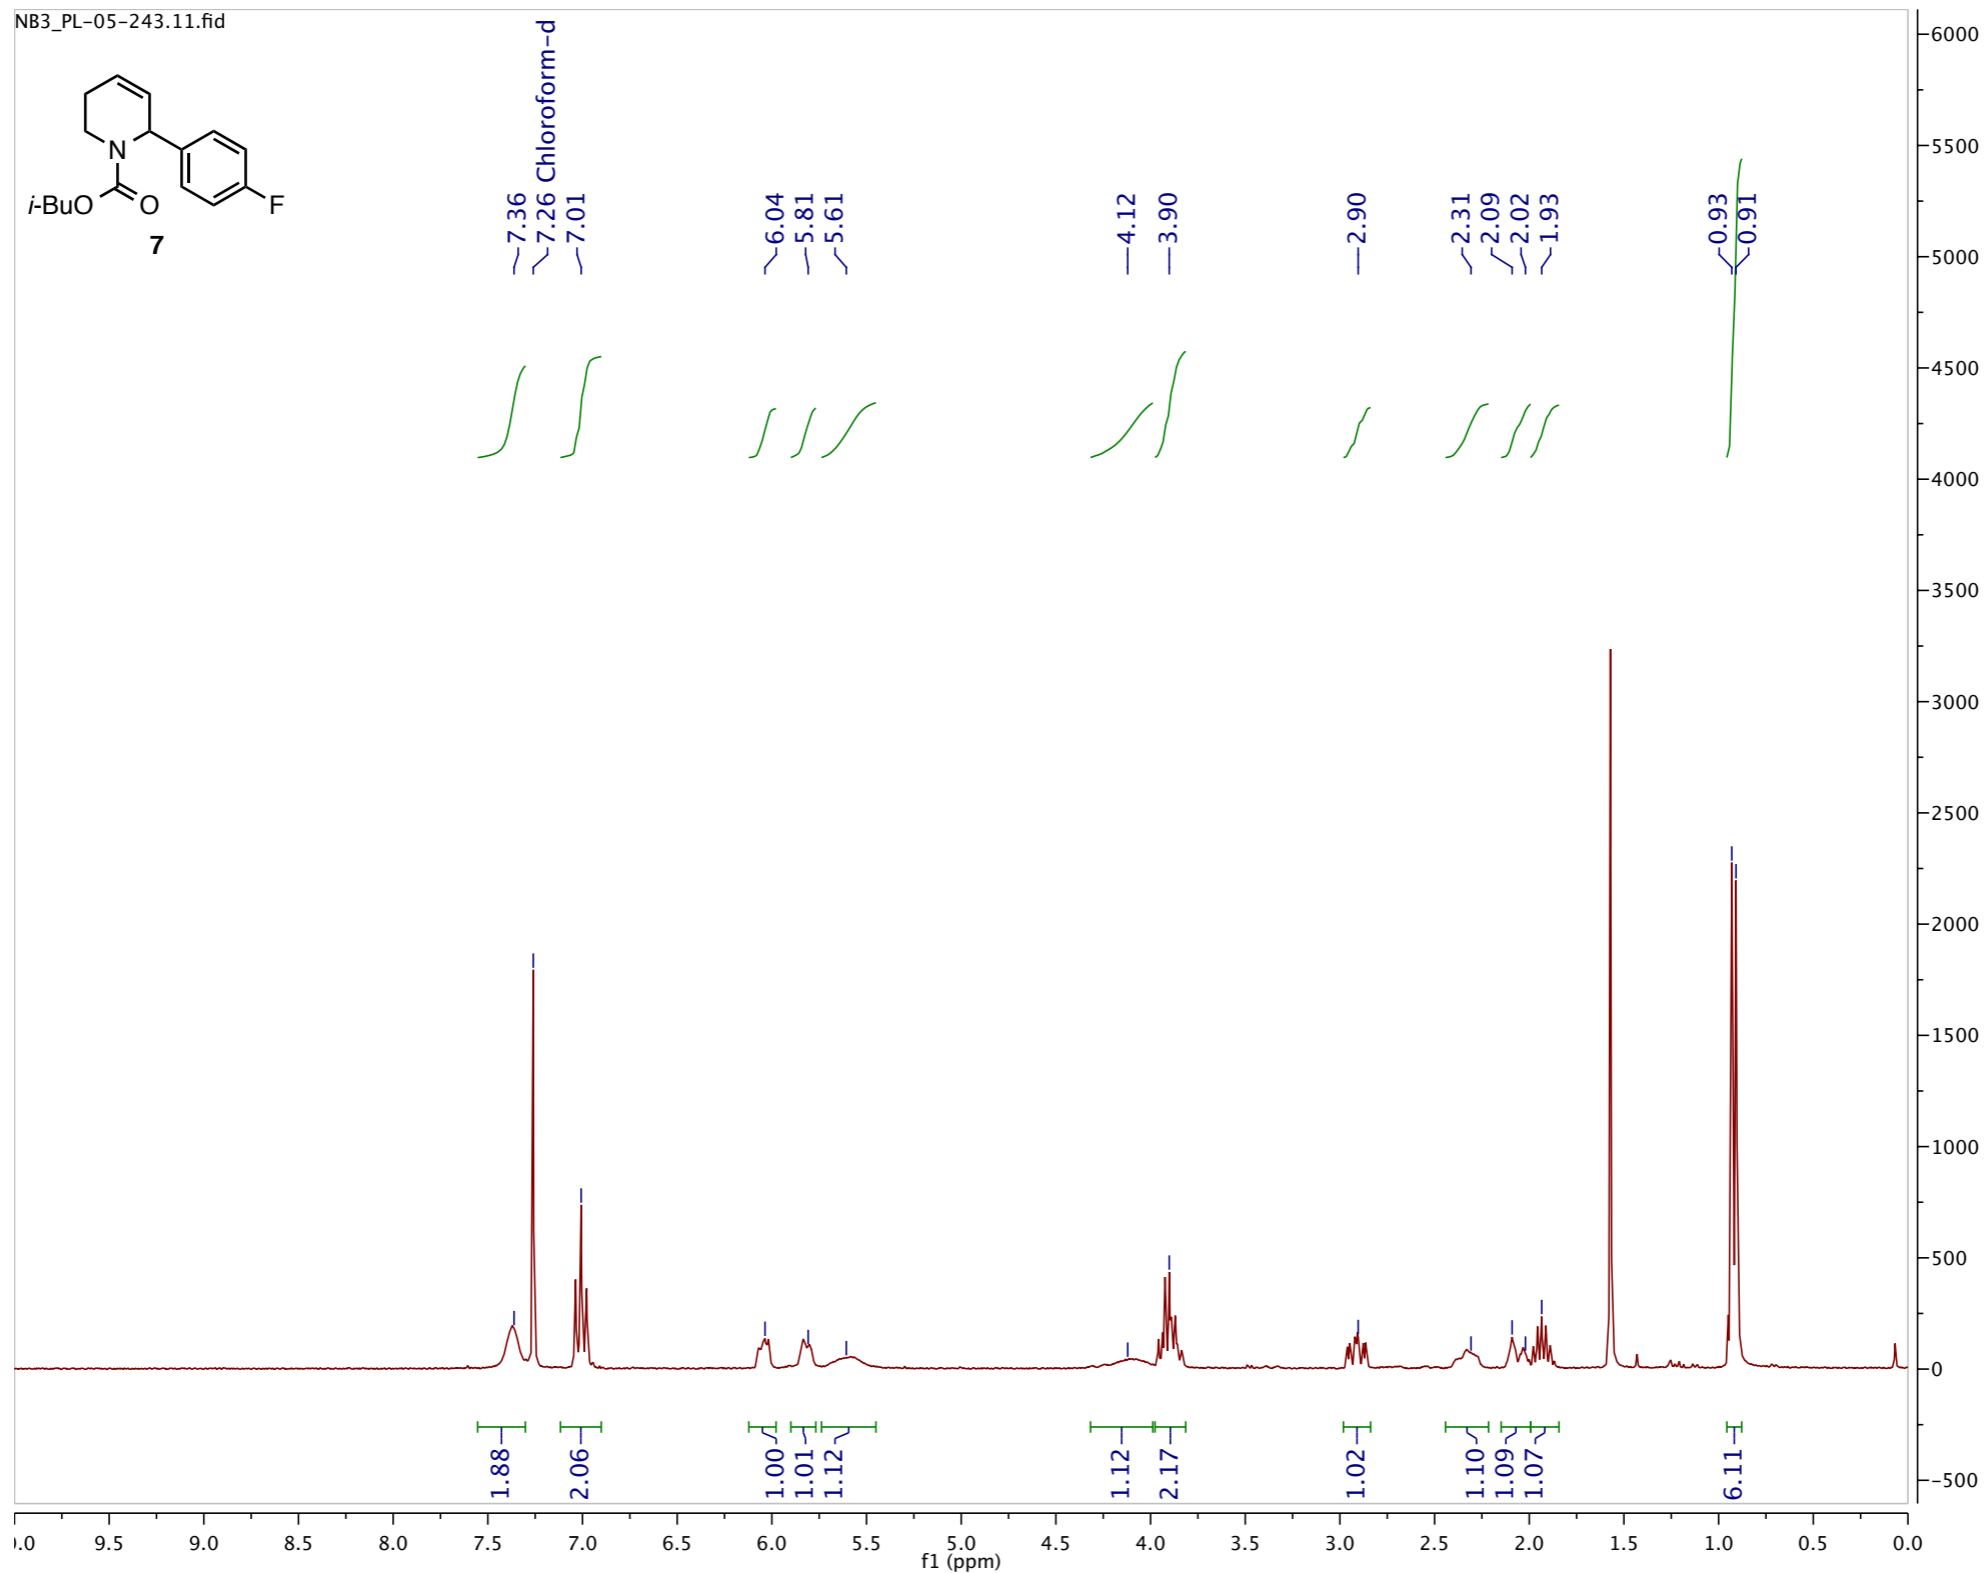

A2\_27-PL-05-237\_carbon.10.fid  
C13CPDp1.PU CDCl3 /opt/topspin3.0 jlutz 27

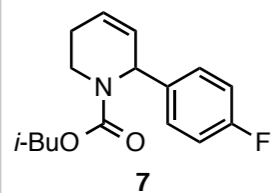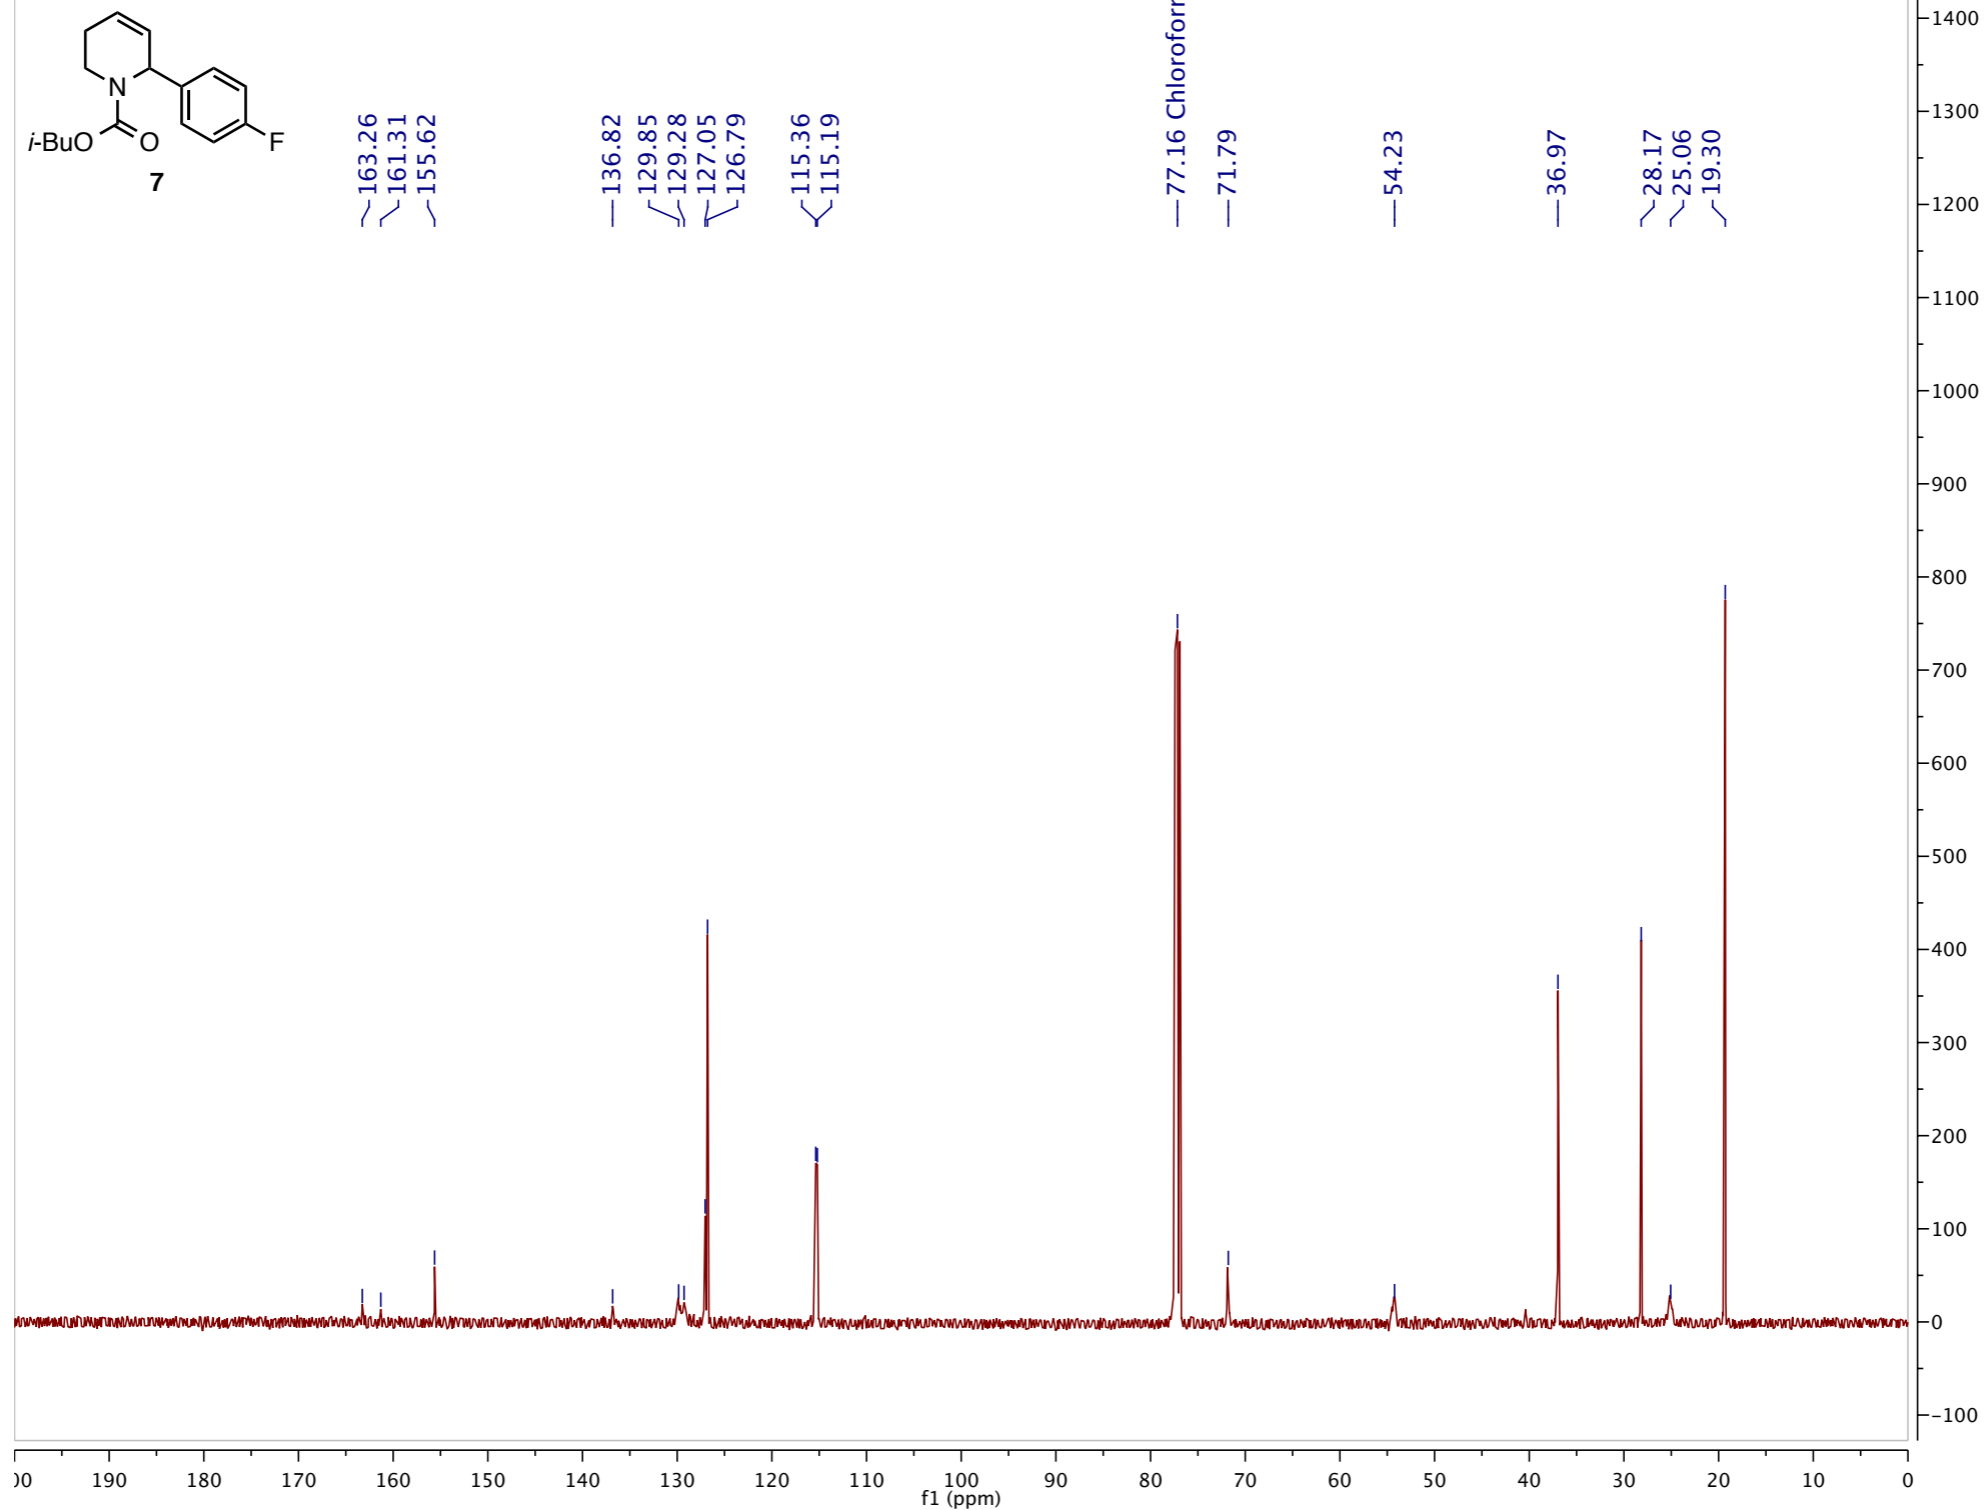

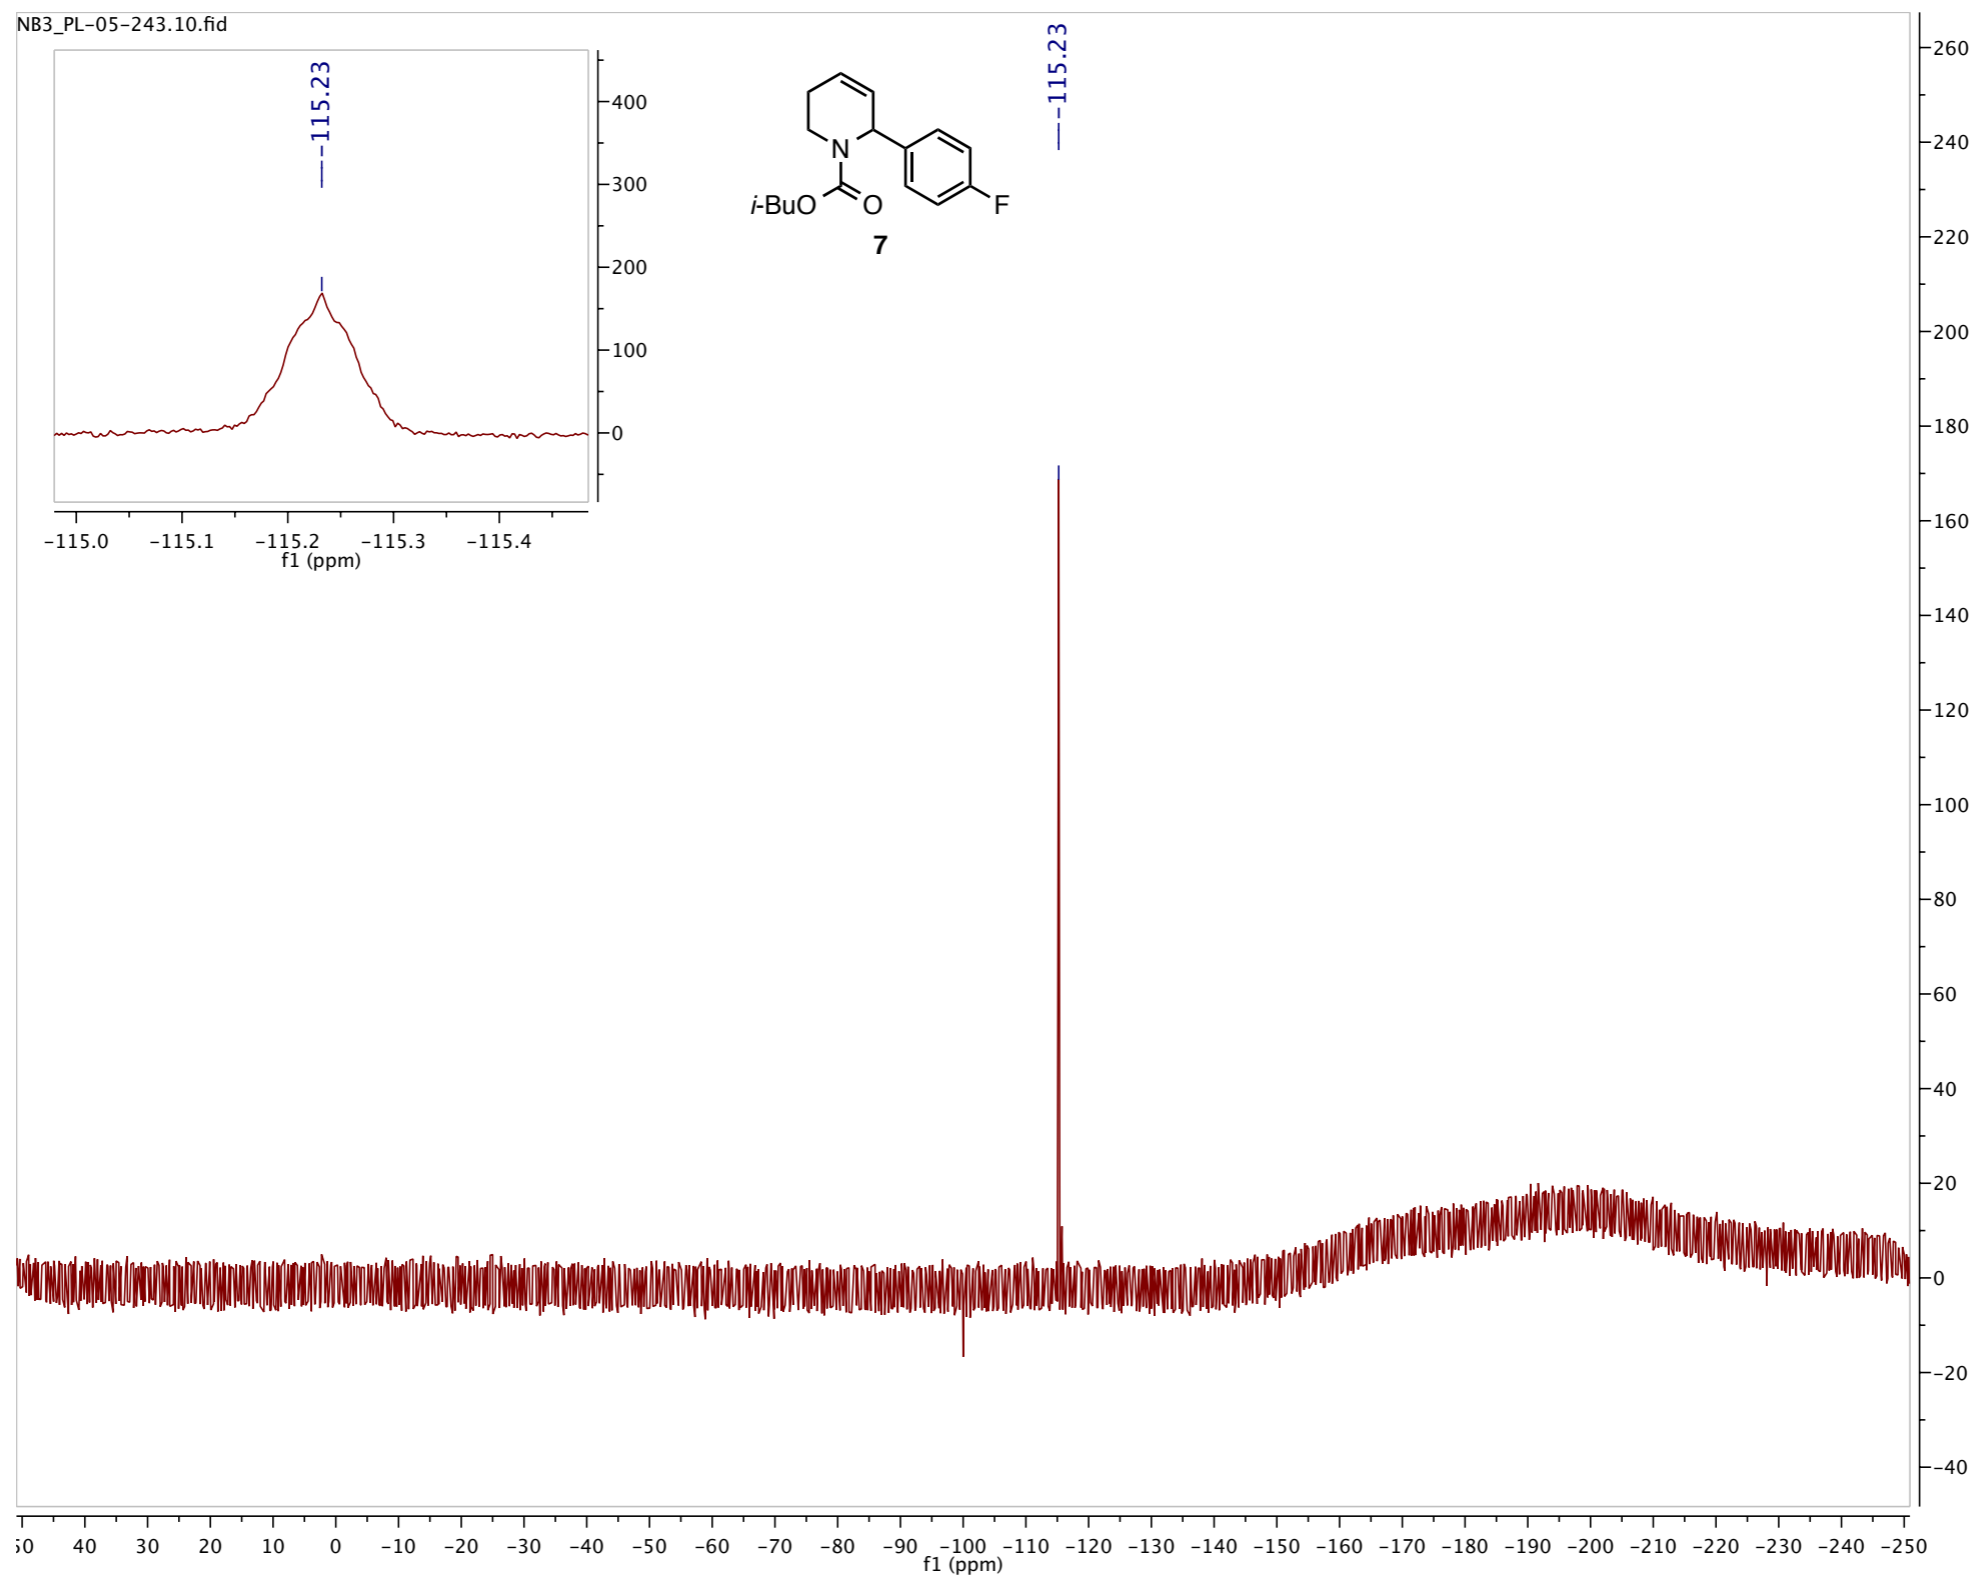

NB3\_PL-05-170.11.fid

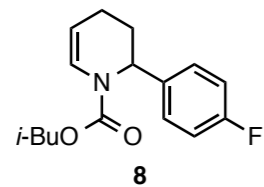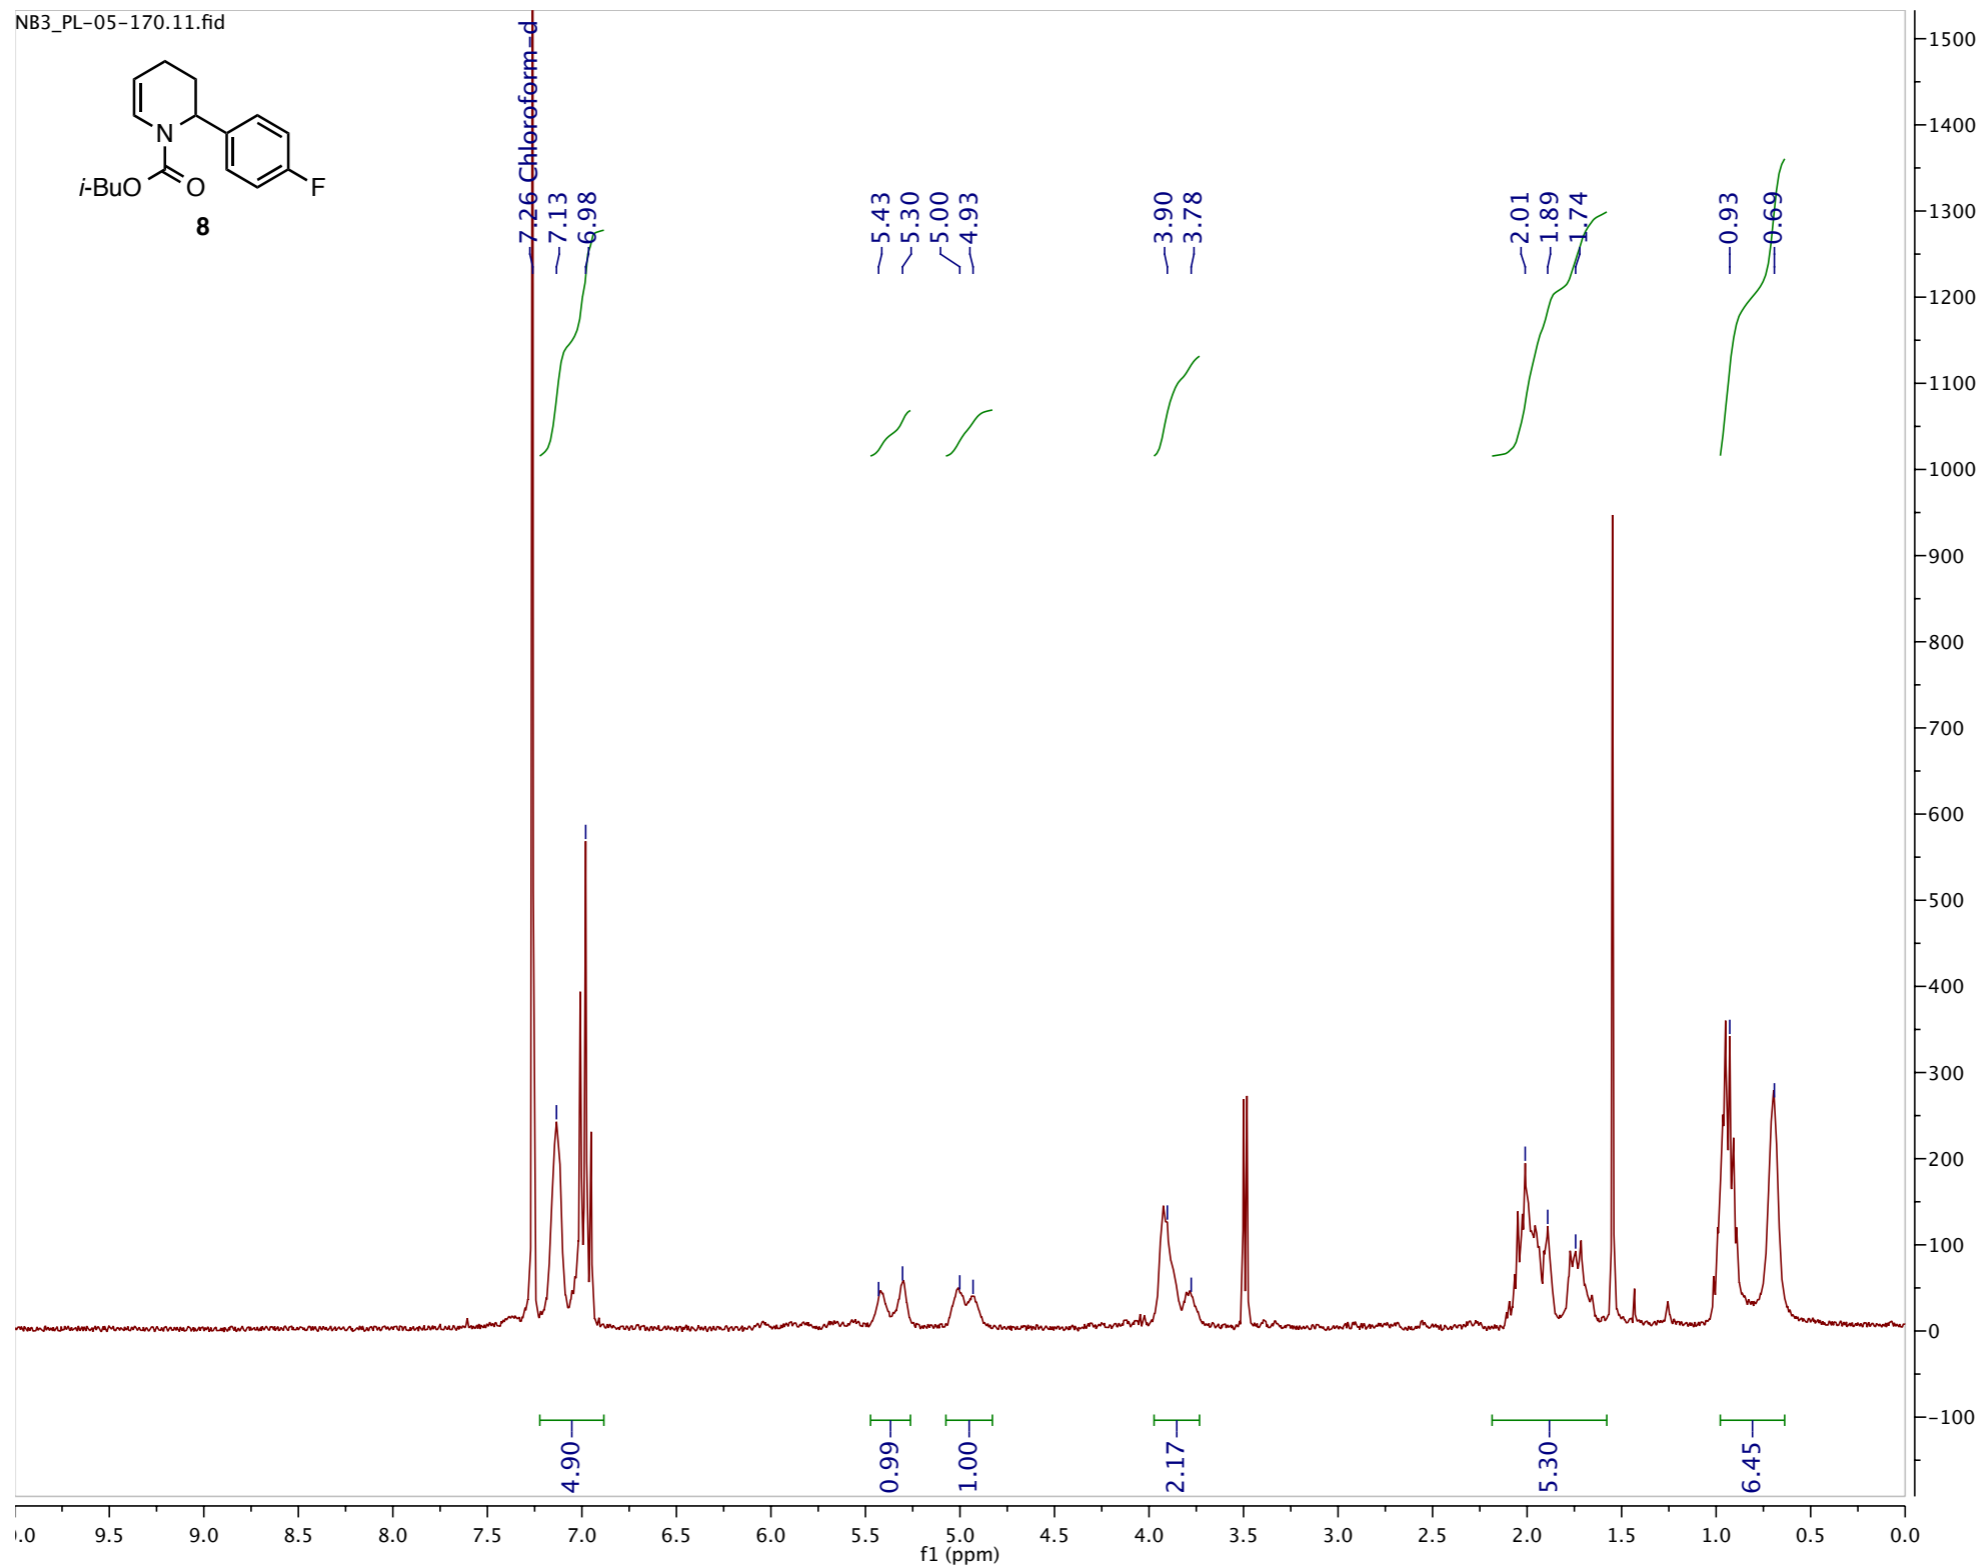

A2\_23-PL-05-138\_carbon.10.fid  
C13CPDp1.PU CDCl3 /opt/topspin3.0 jlutz 23

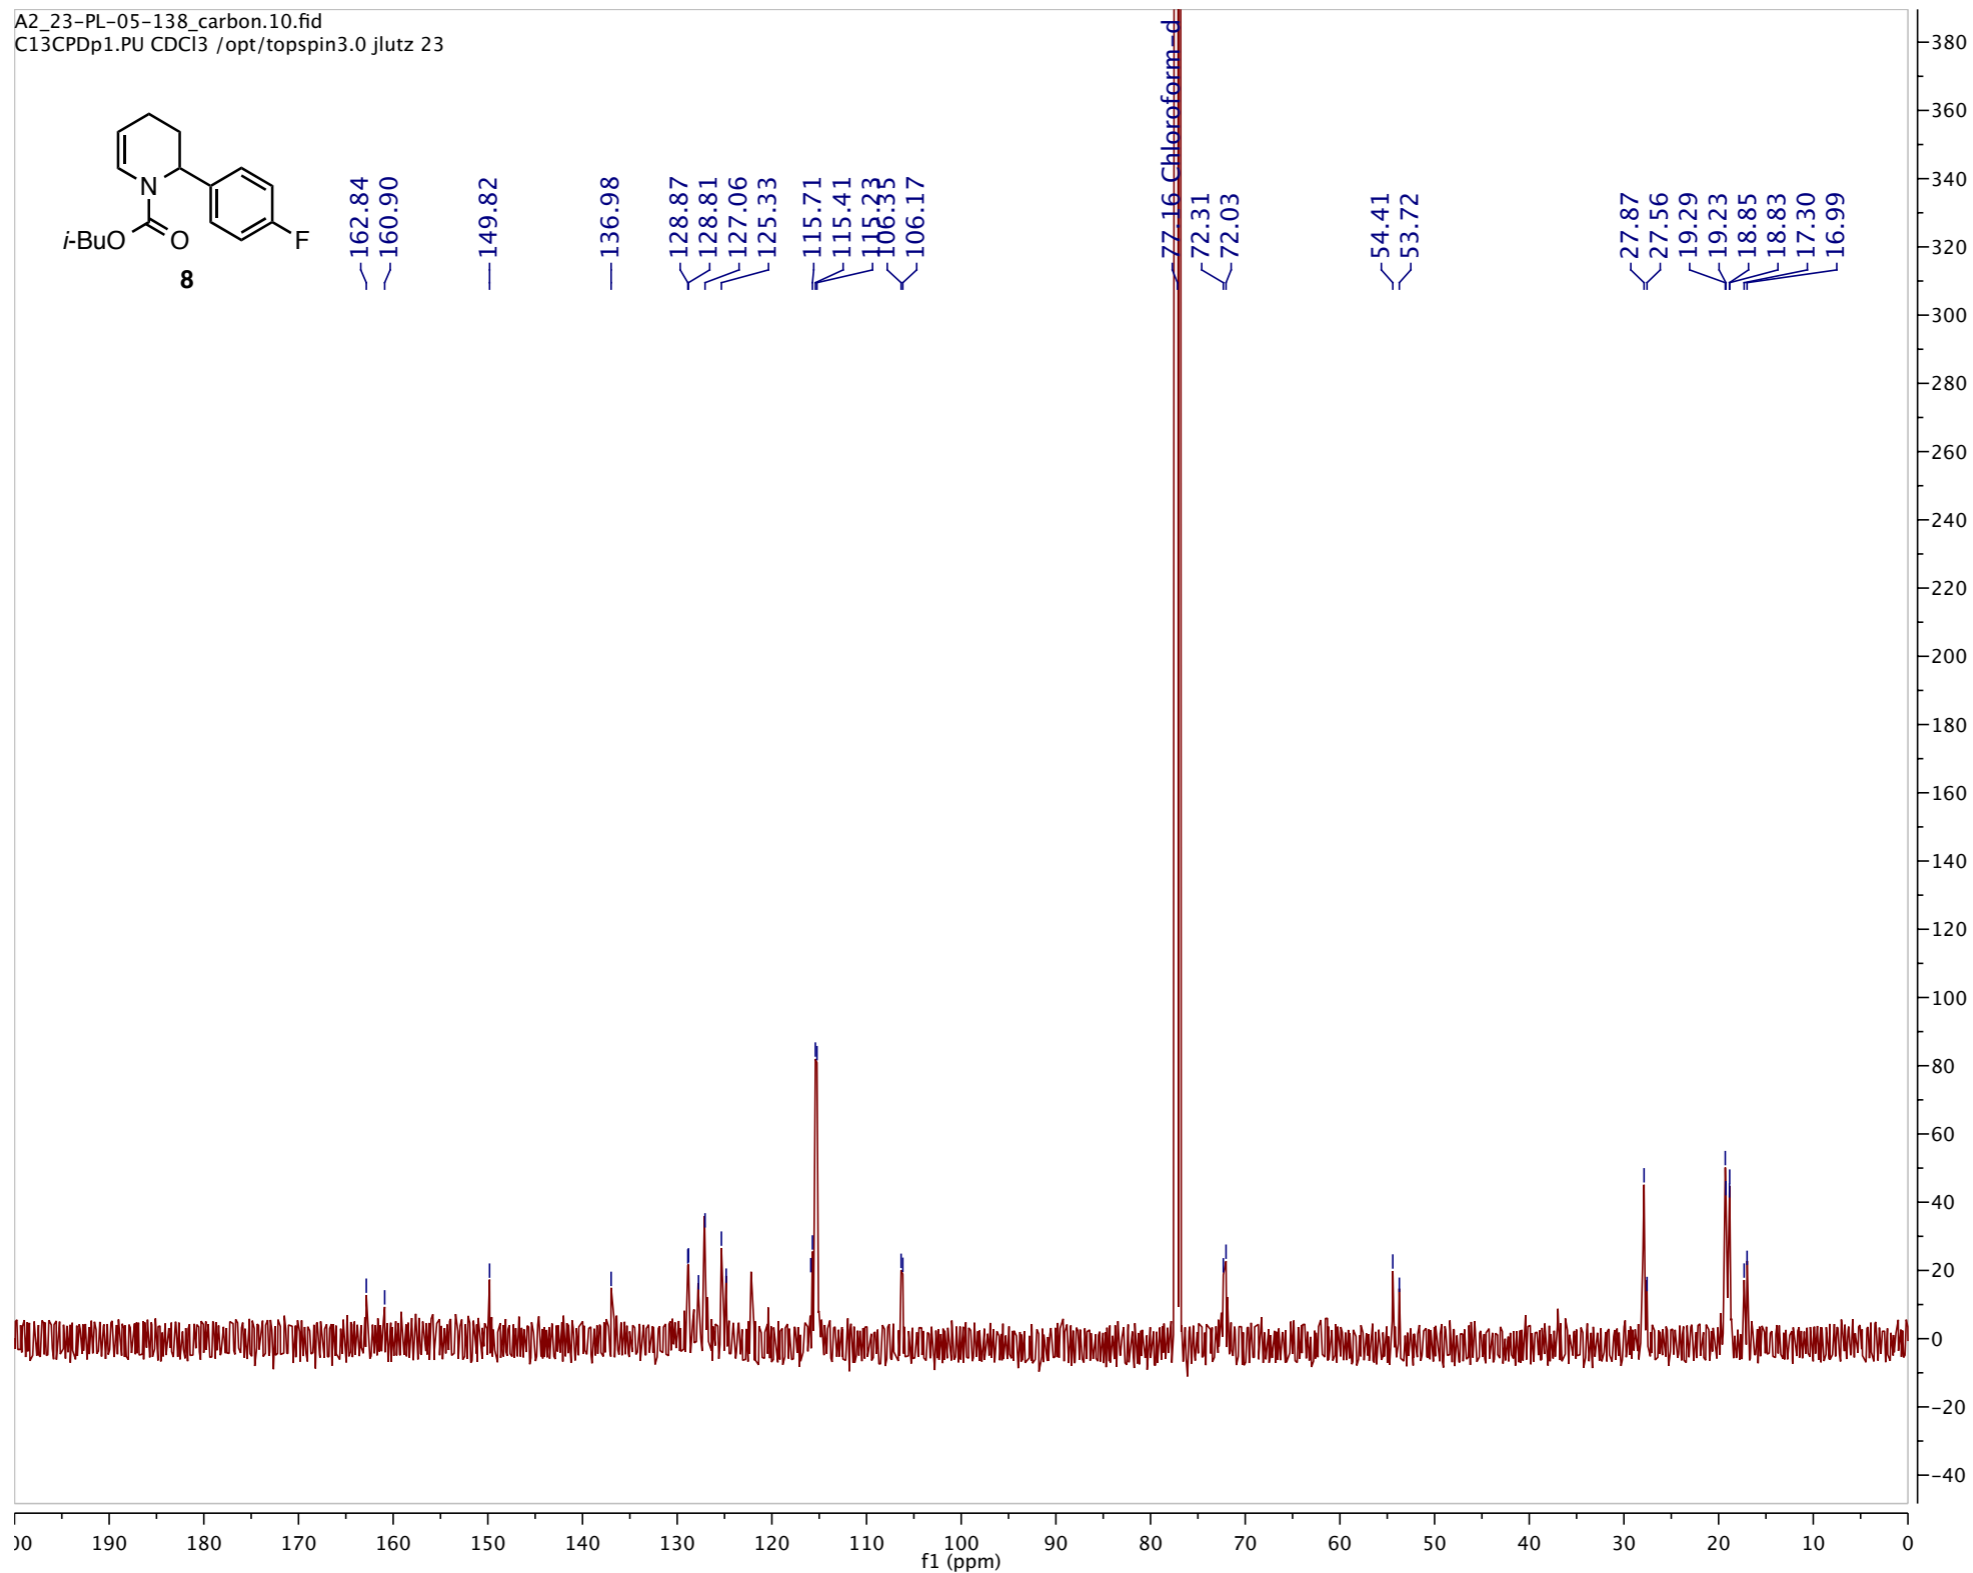

125 MHz <sup>13</sup>C-NMR spectrum of **8** in CDCl<sub>3</sub>

NB3\_PL-05-170.10.fid

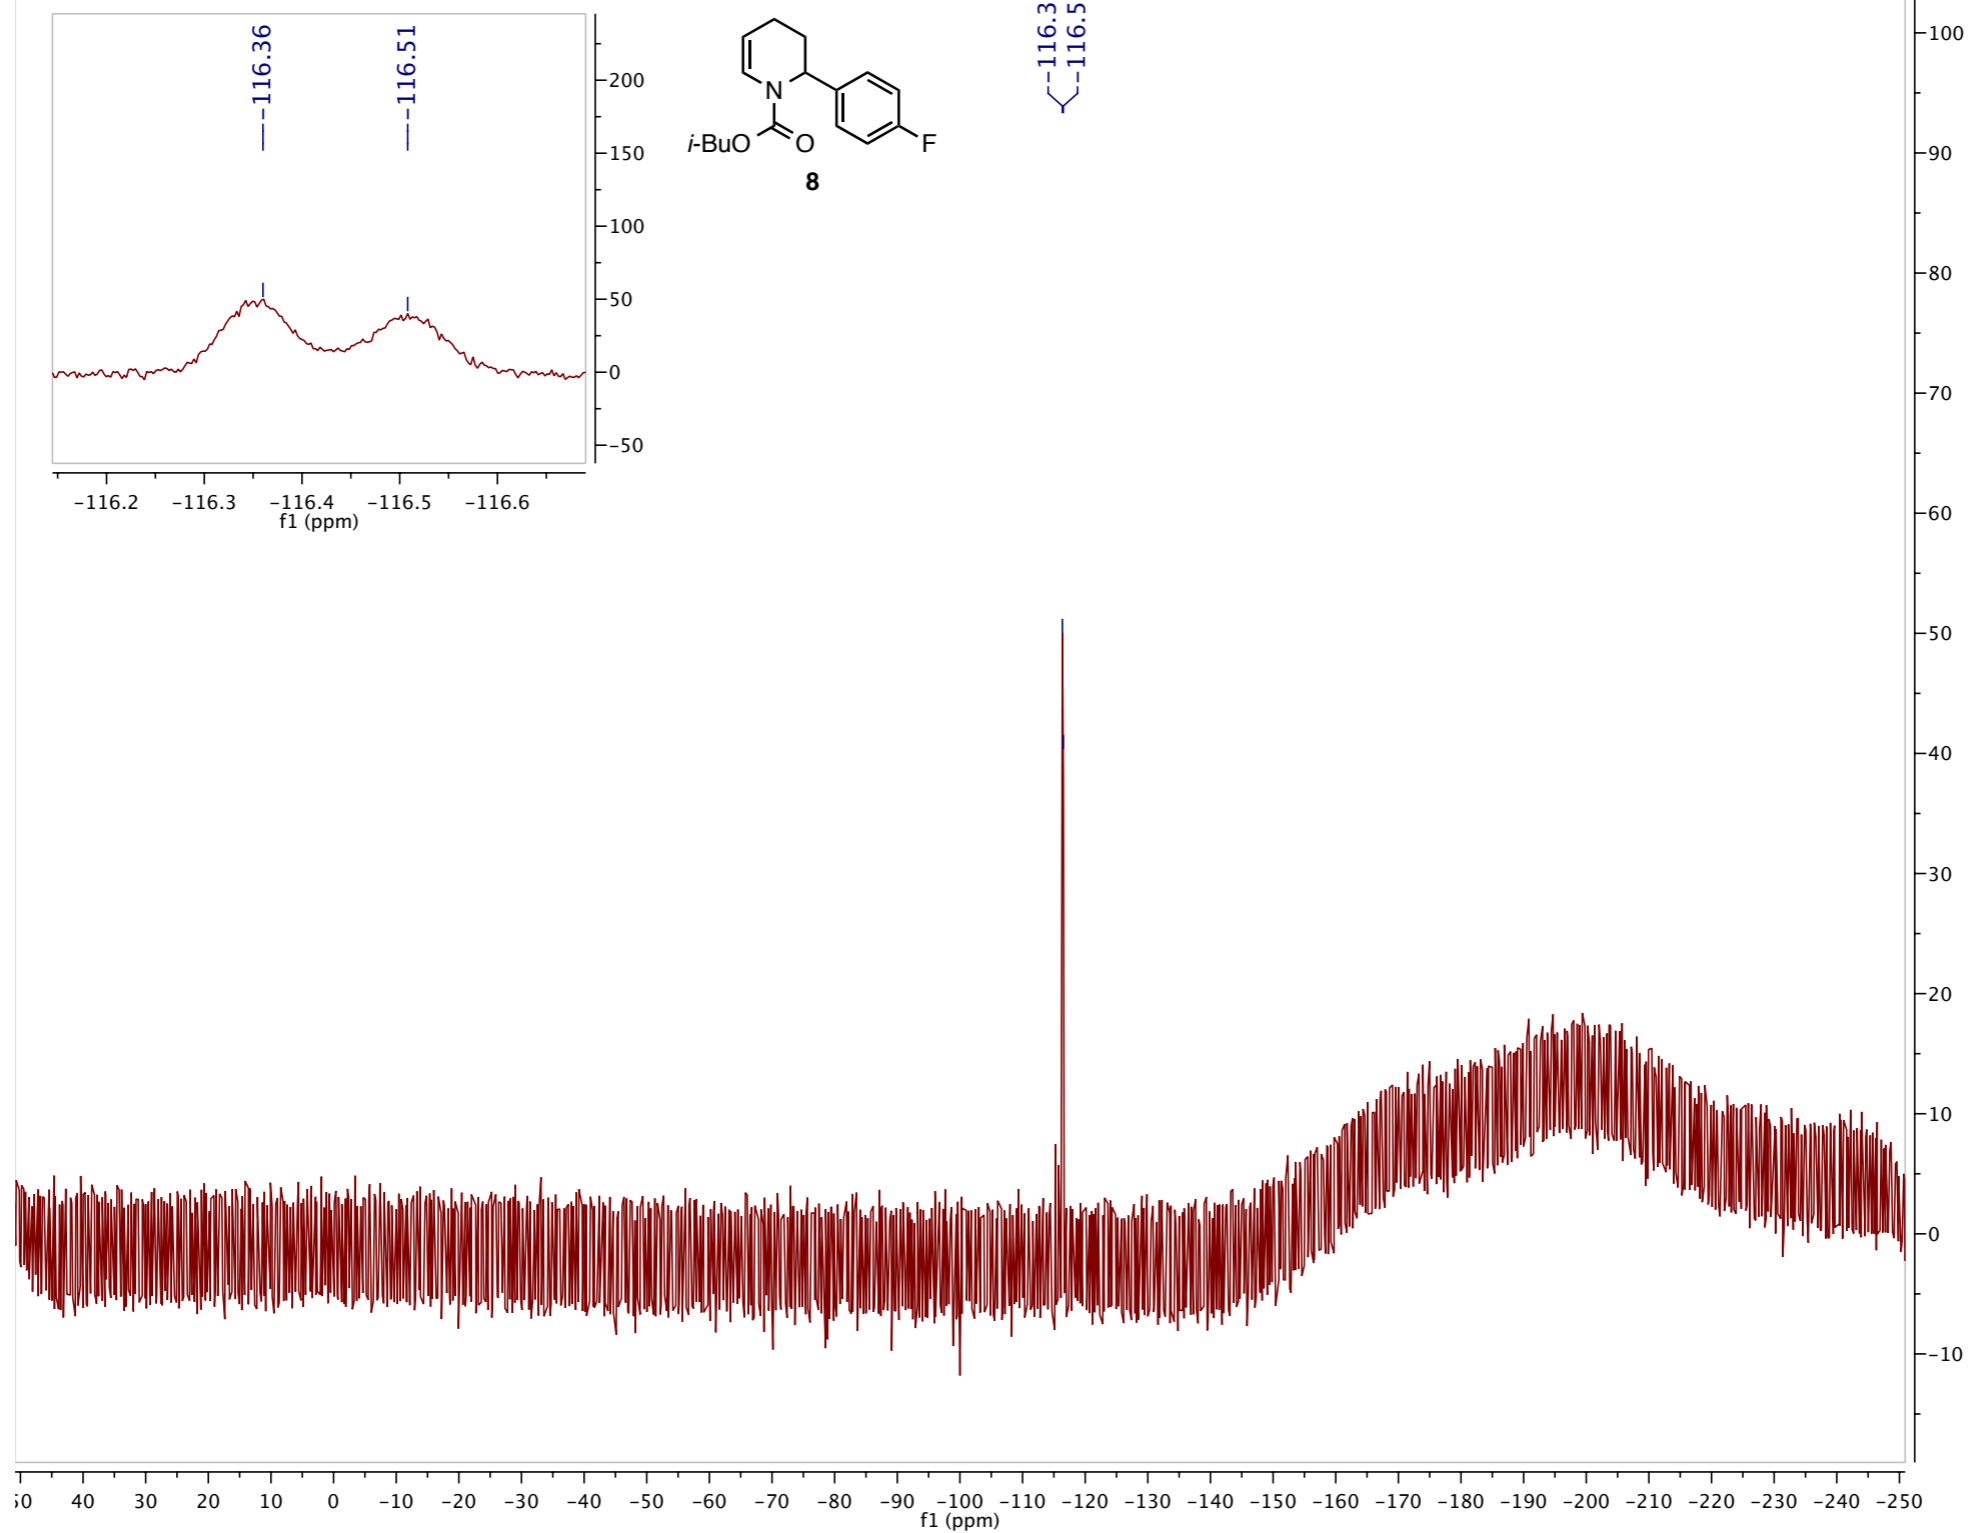

282 MHz  $^{19}\text{F}$ -NMR spectrum of **8** in  $\text{CDCl}_3$

NB3\_PL-05-181.11.fid

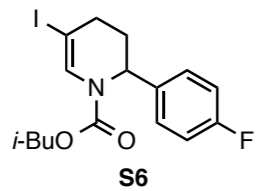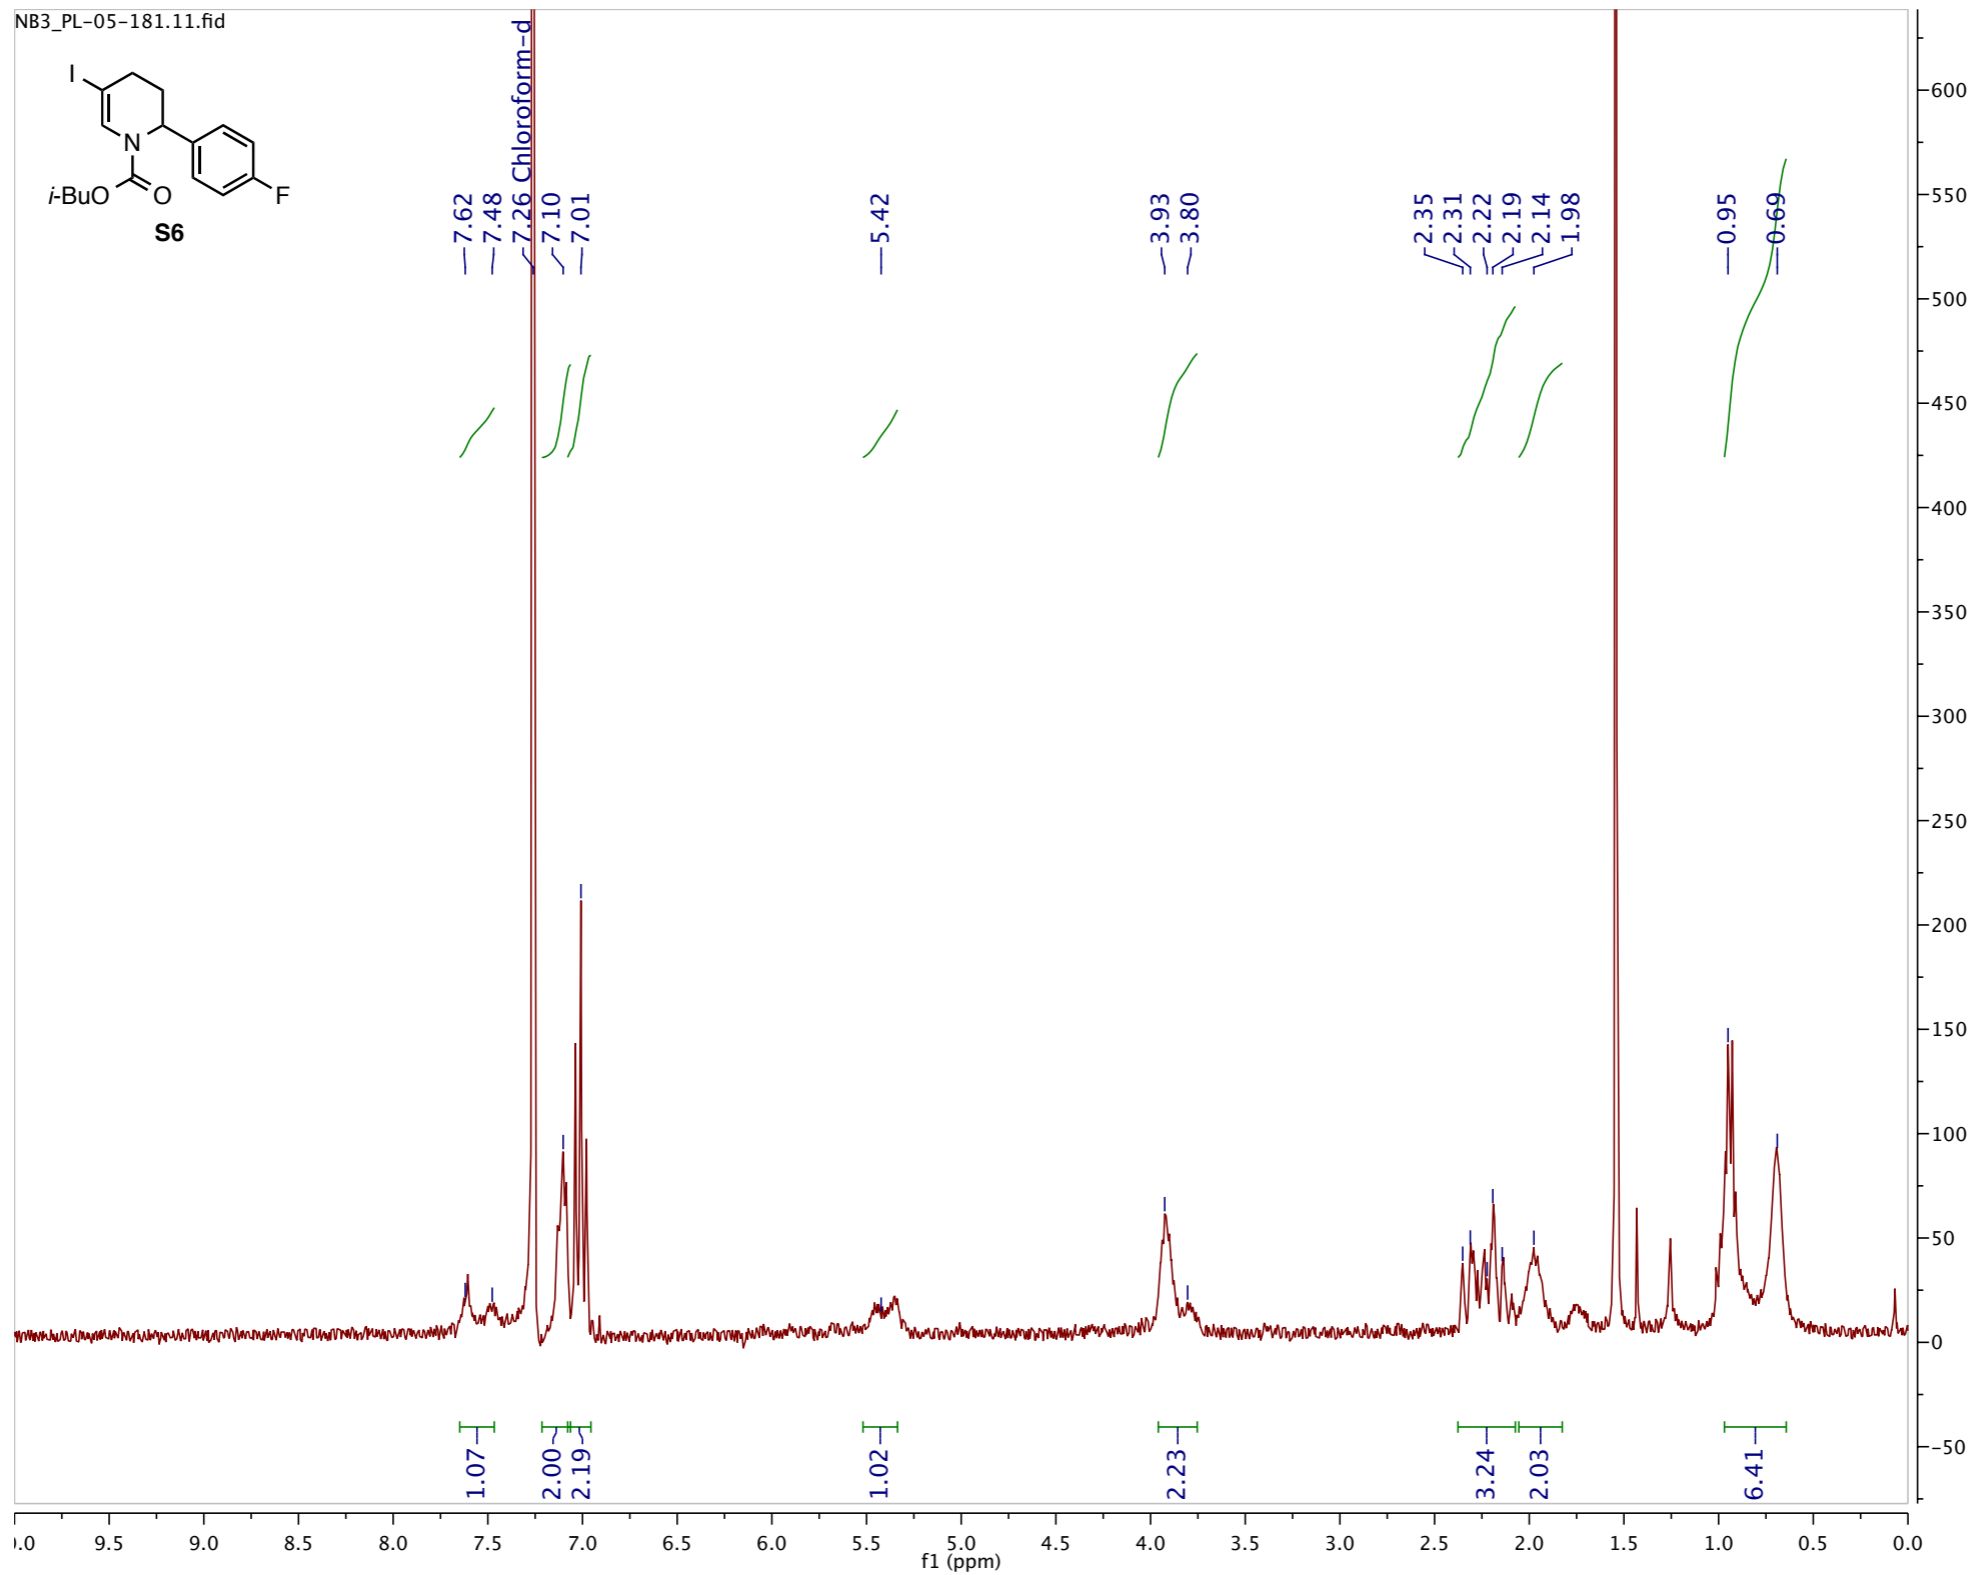



NB3\_PL-05-161.10.fid

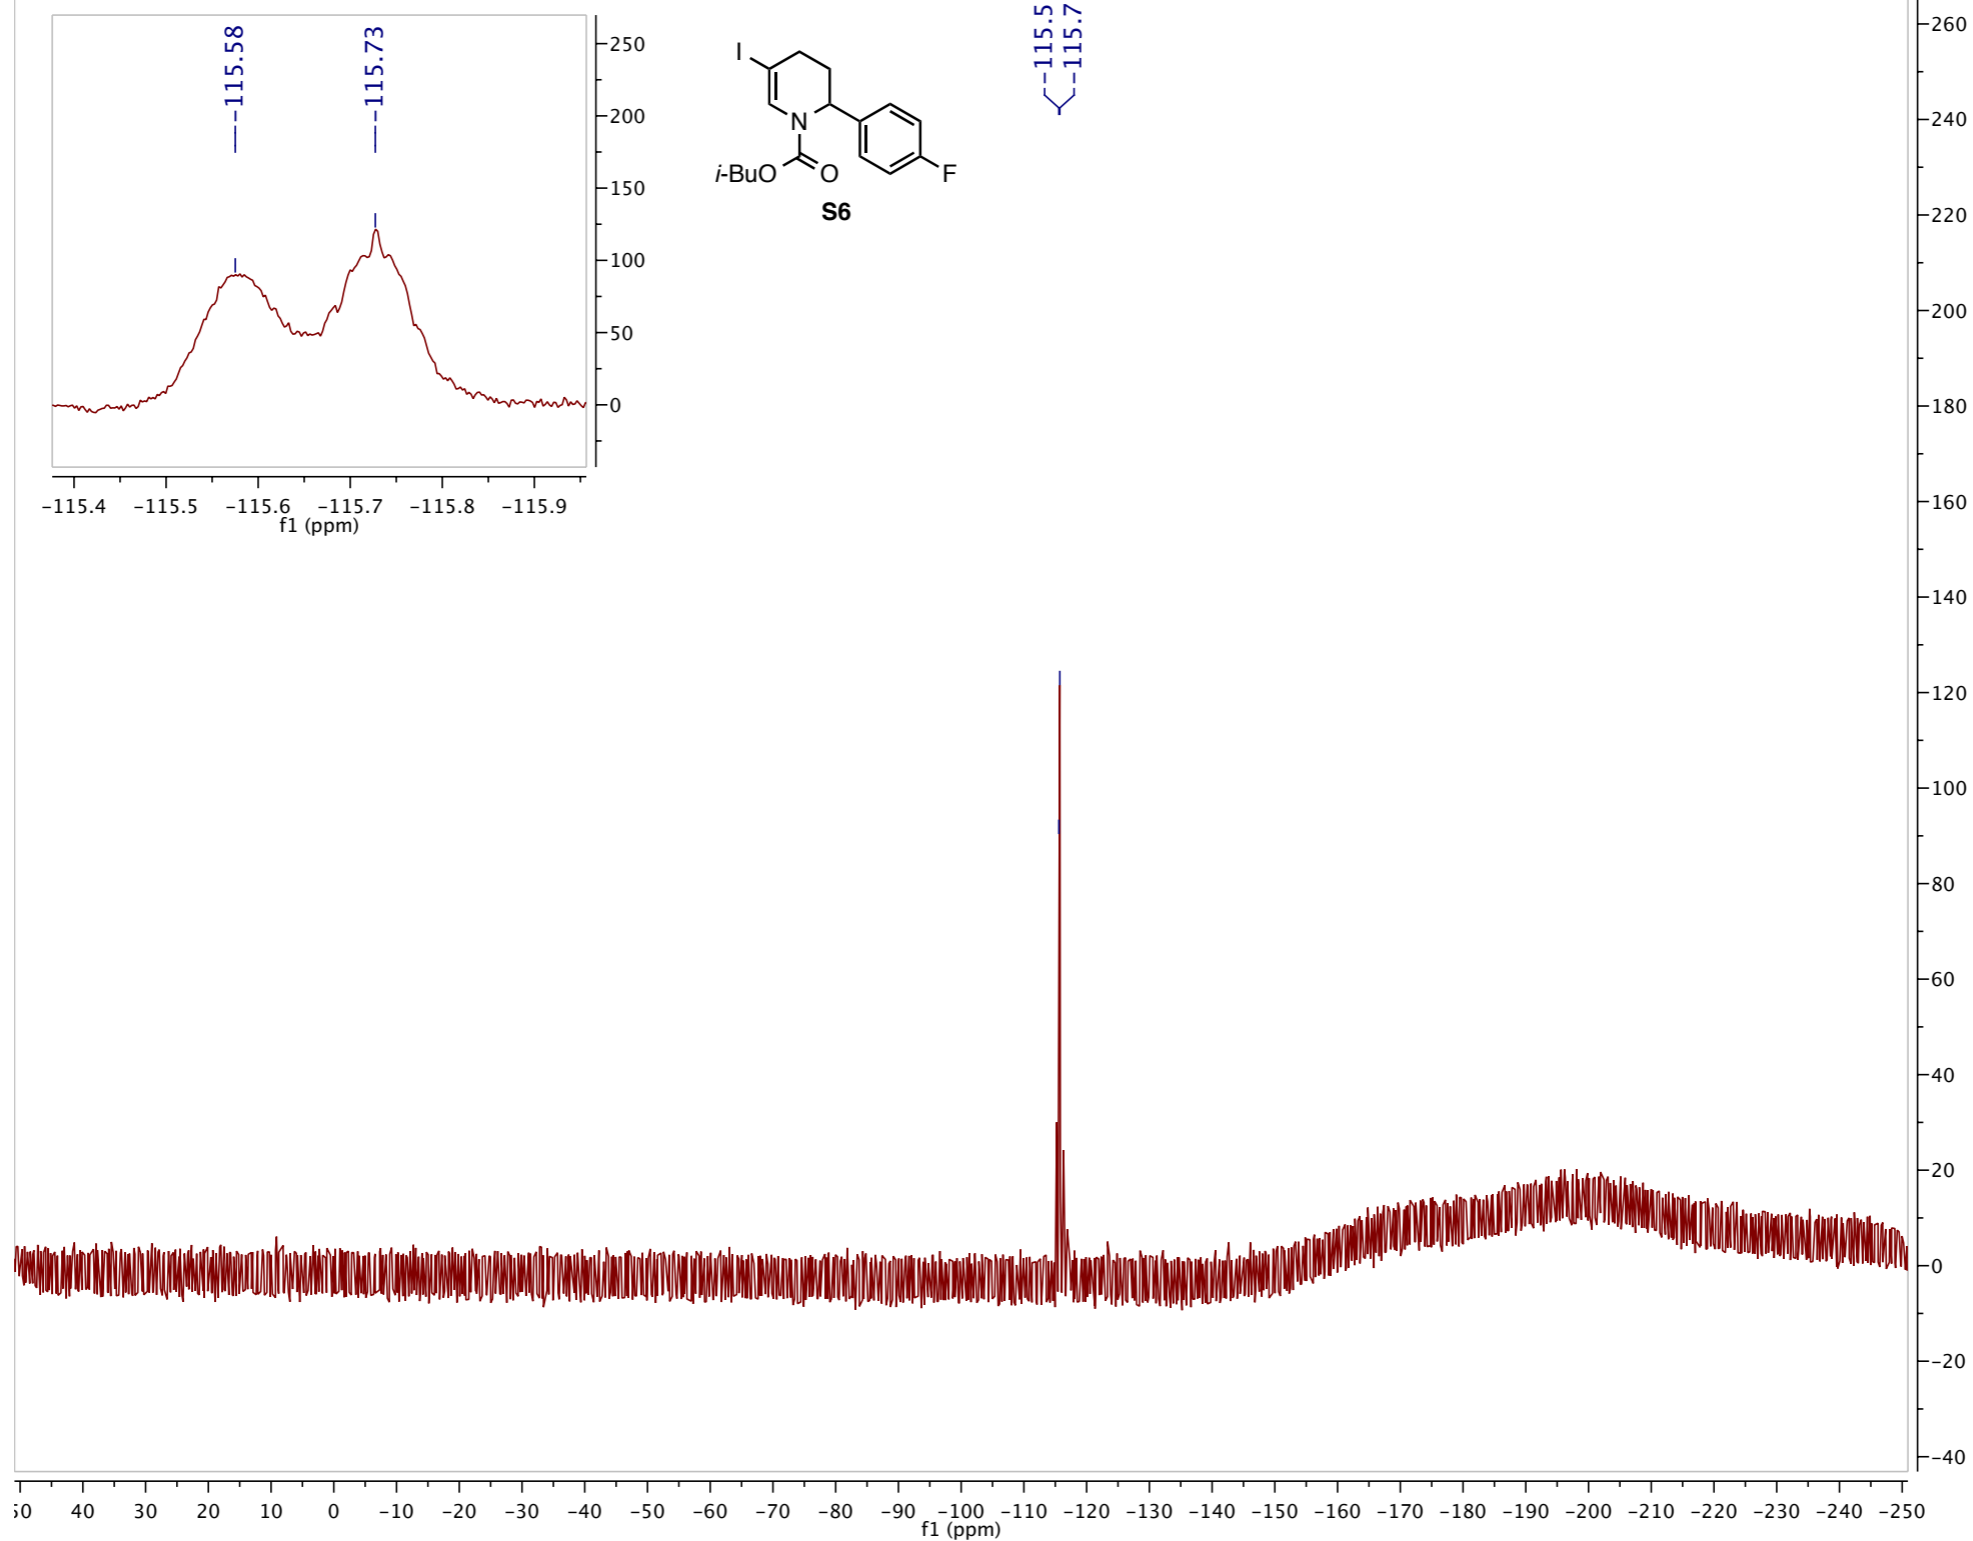

282 MHz  $^{19}\text{F}$ -NMR spectrum of **S6** in  $\text{CDCl}_3$

NB3\_PL-05-175.11.fid

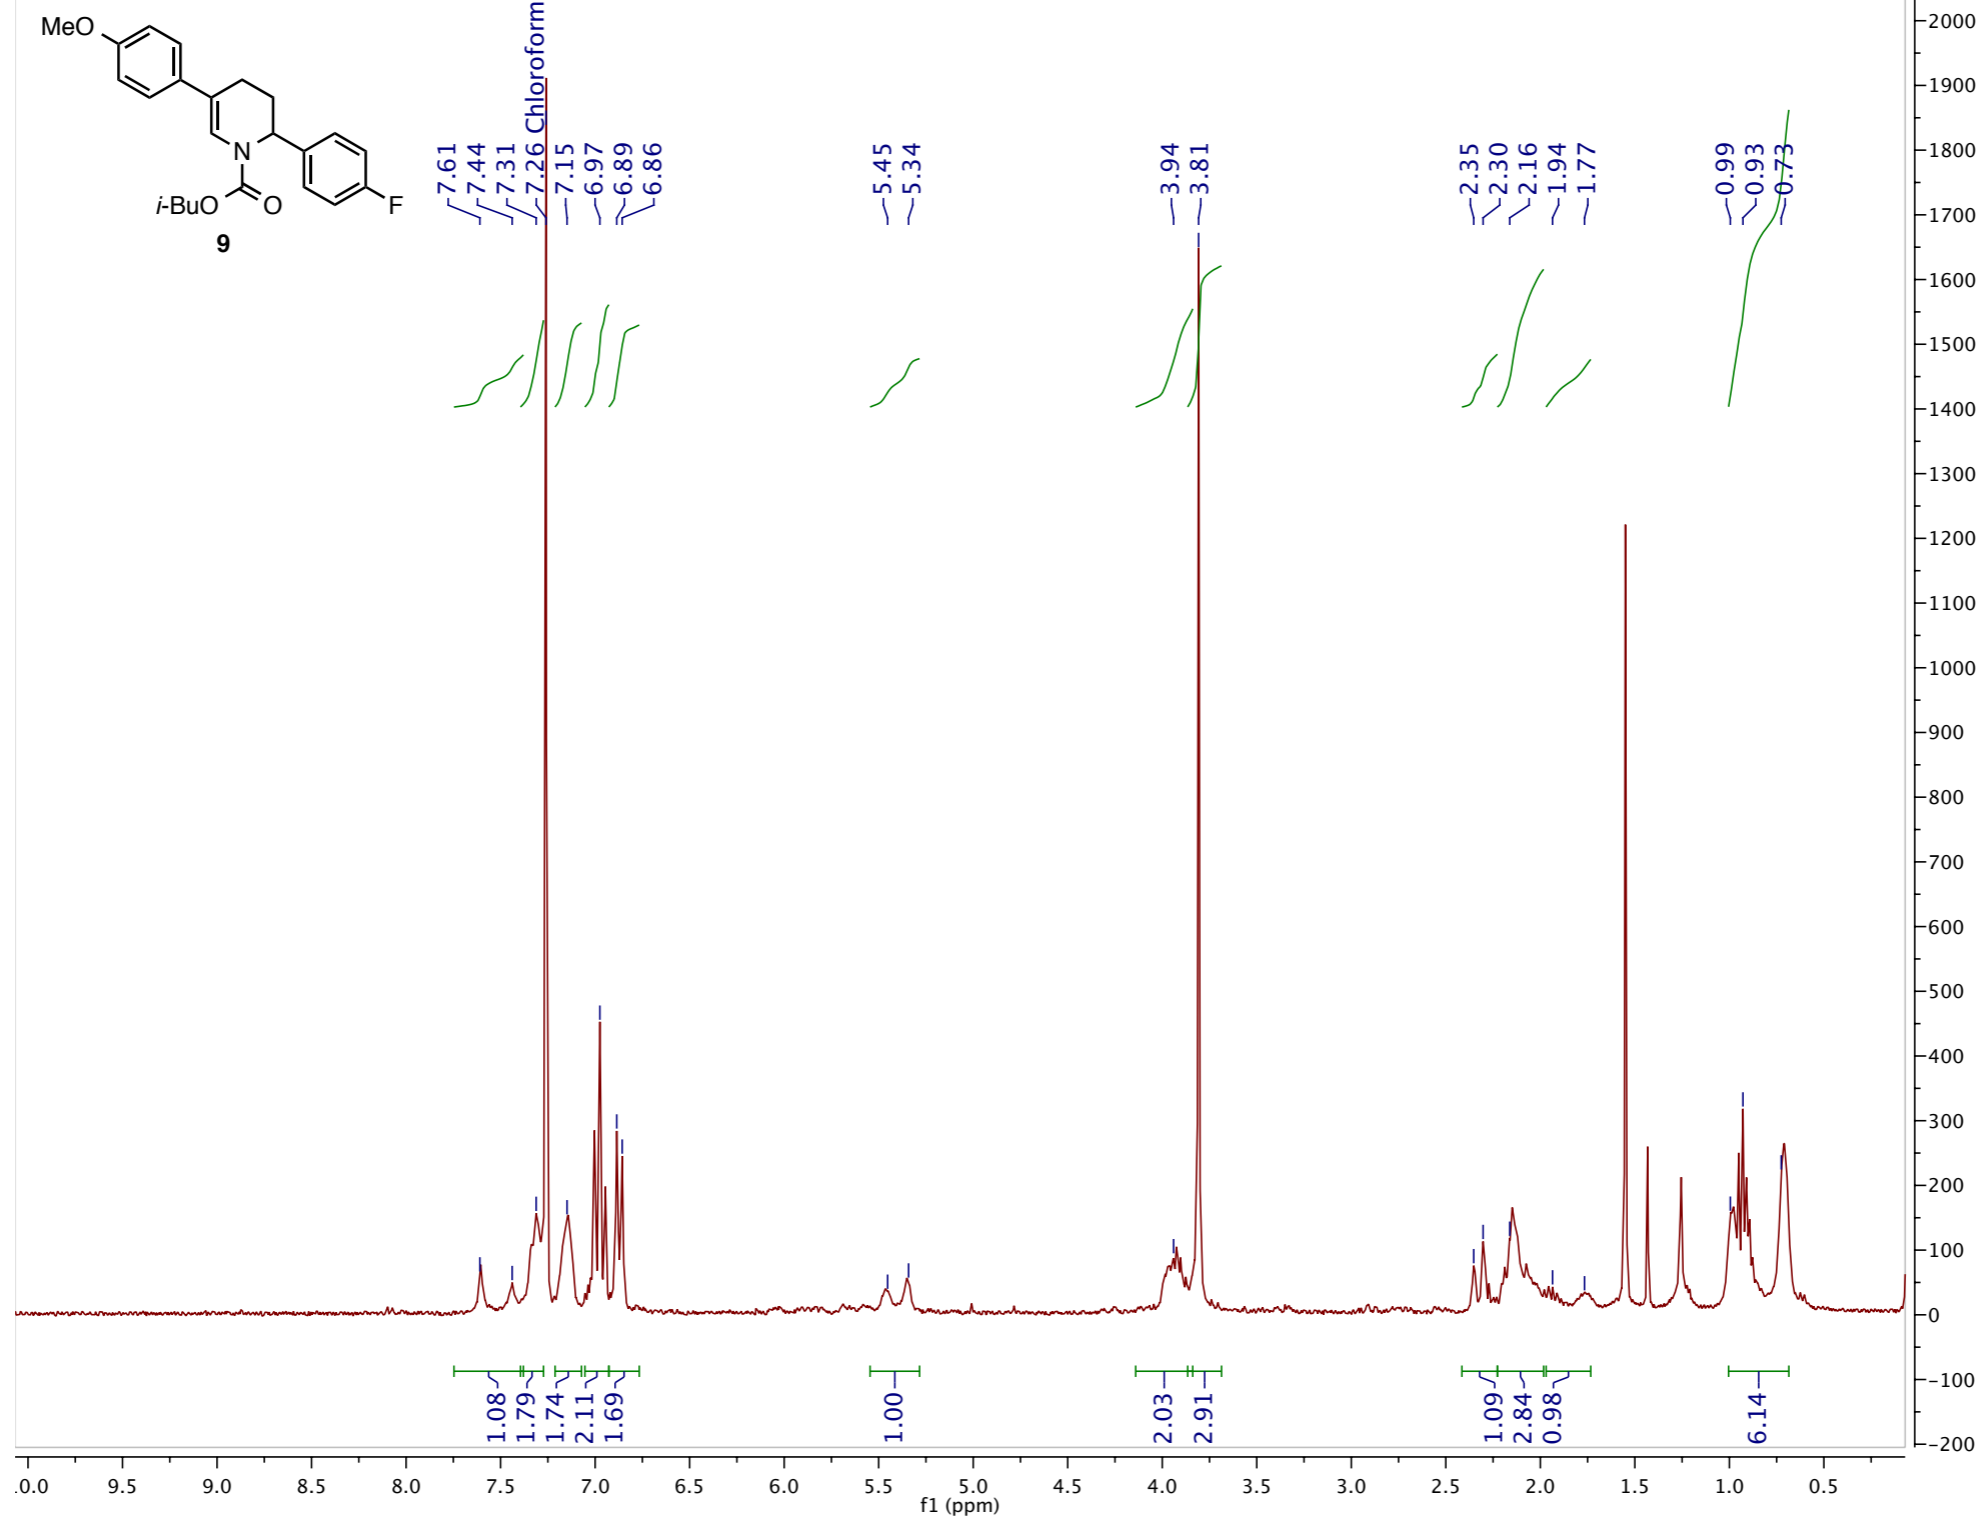

300 MHz <sup>1</sup>H-NMR spectrum of **9** in CDCl<sub>3</sub>

A2\_25-PL-05-175\_carbon.10.fid  
C13CPDp1.PU CDCl3 /opt/topspin3.0 jlutz 25

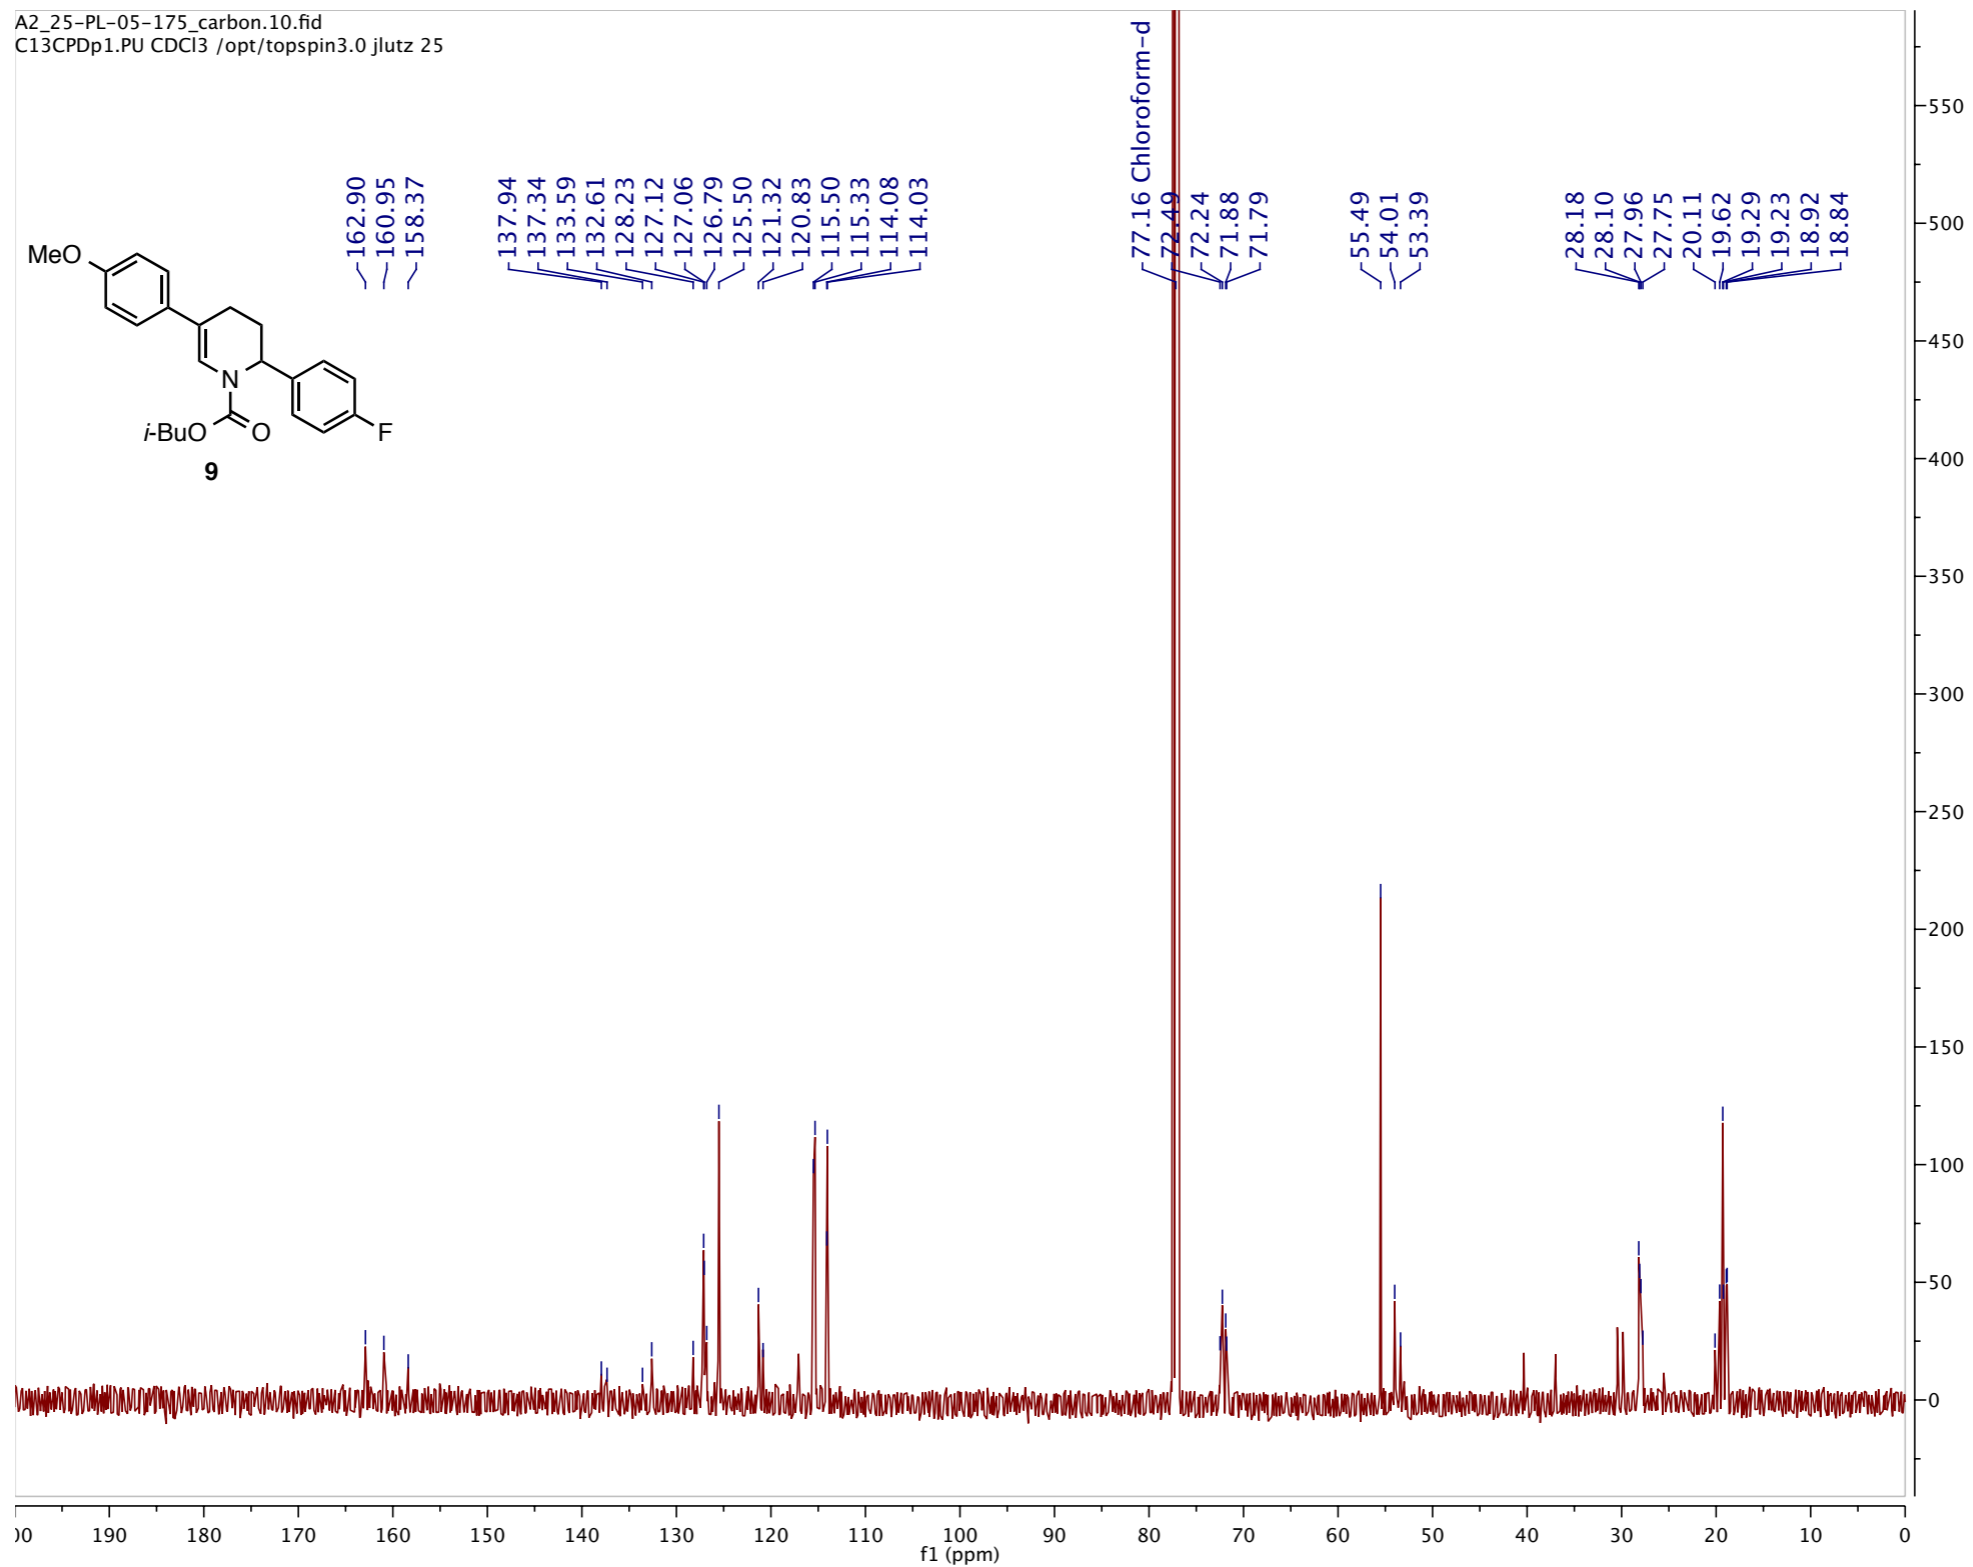

125 MHz  $^{13}\text{C}$ -NMR spectrum of 9 in  $\text{CDCl}_3$

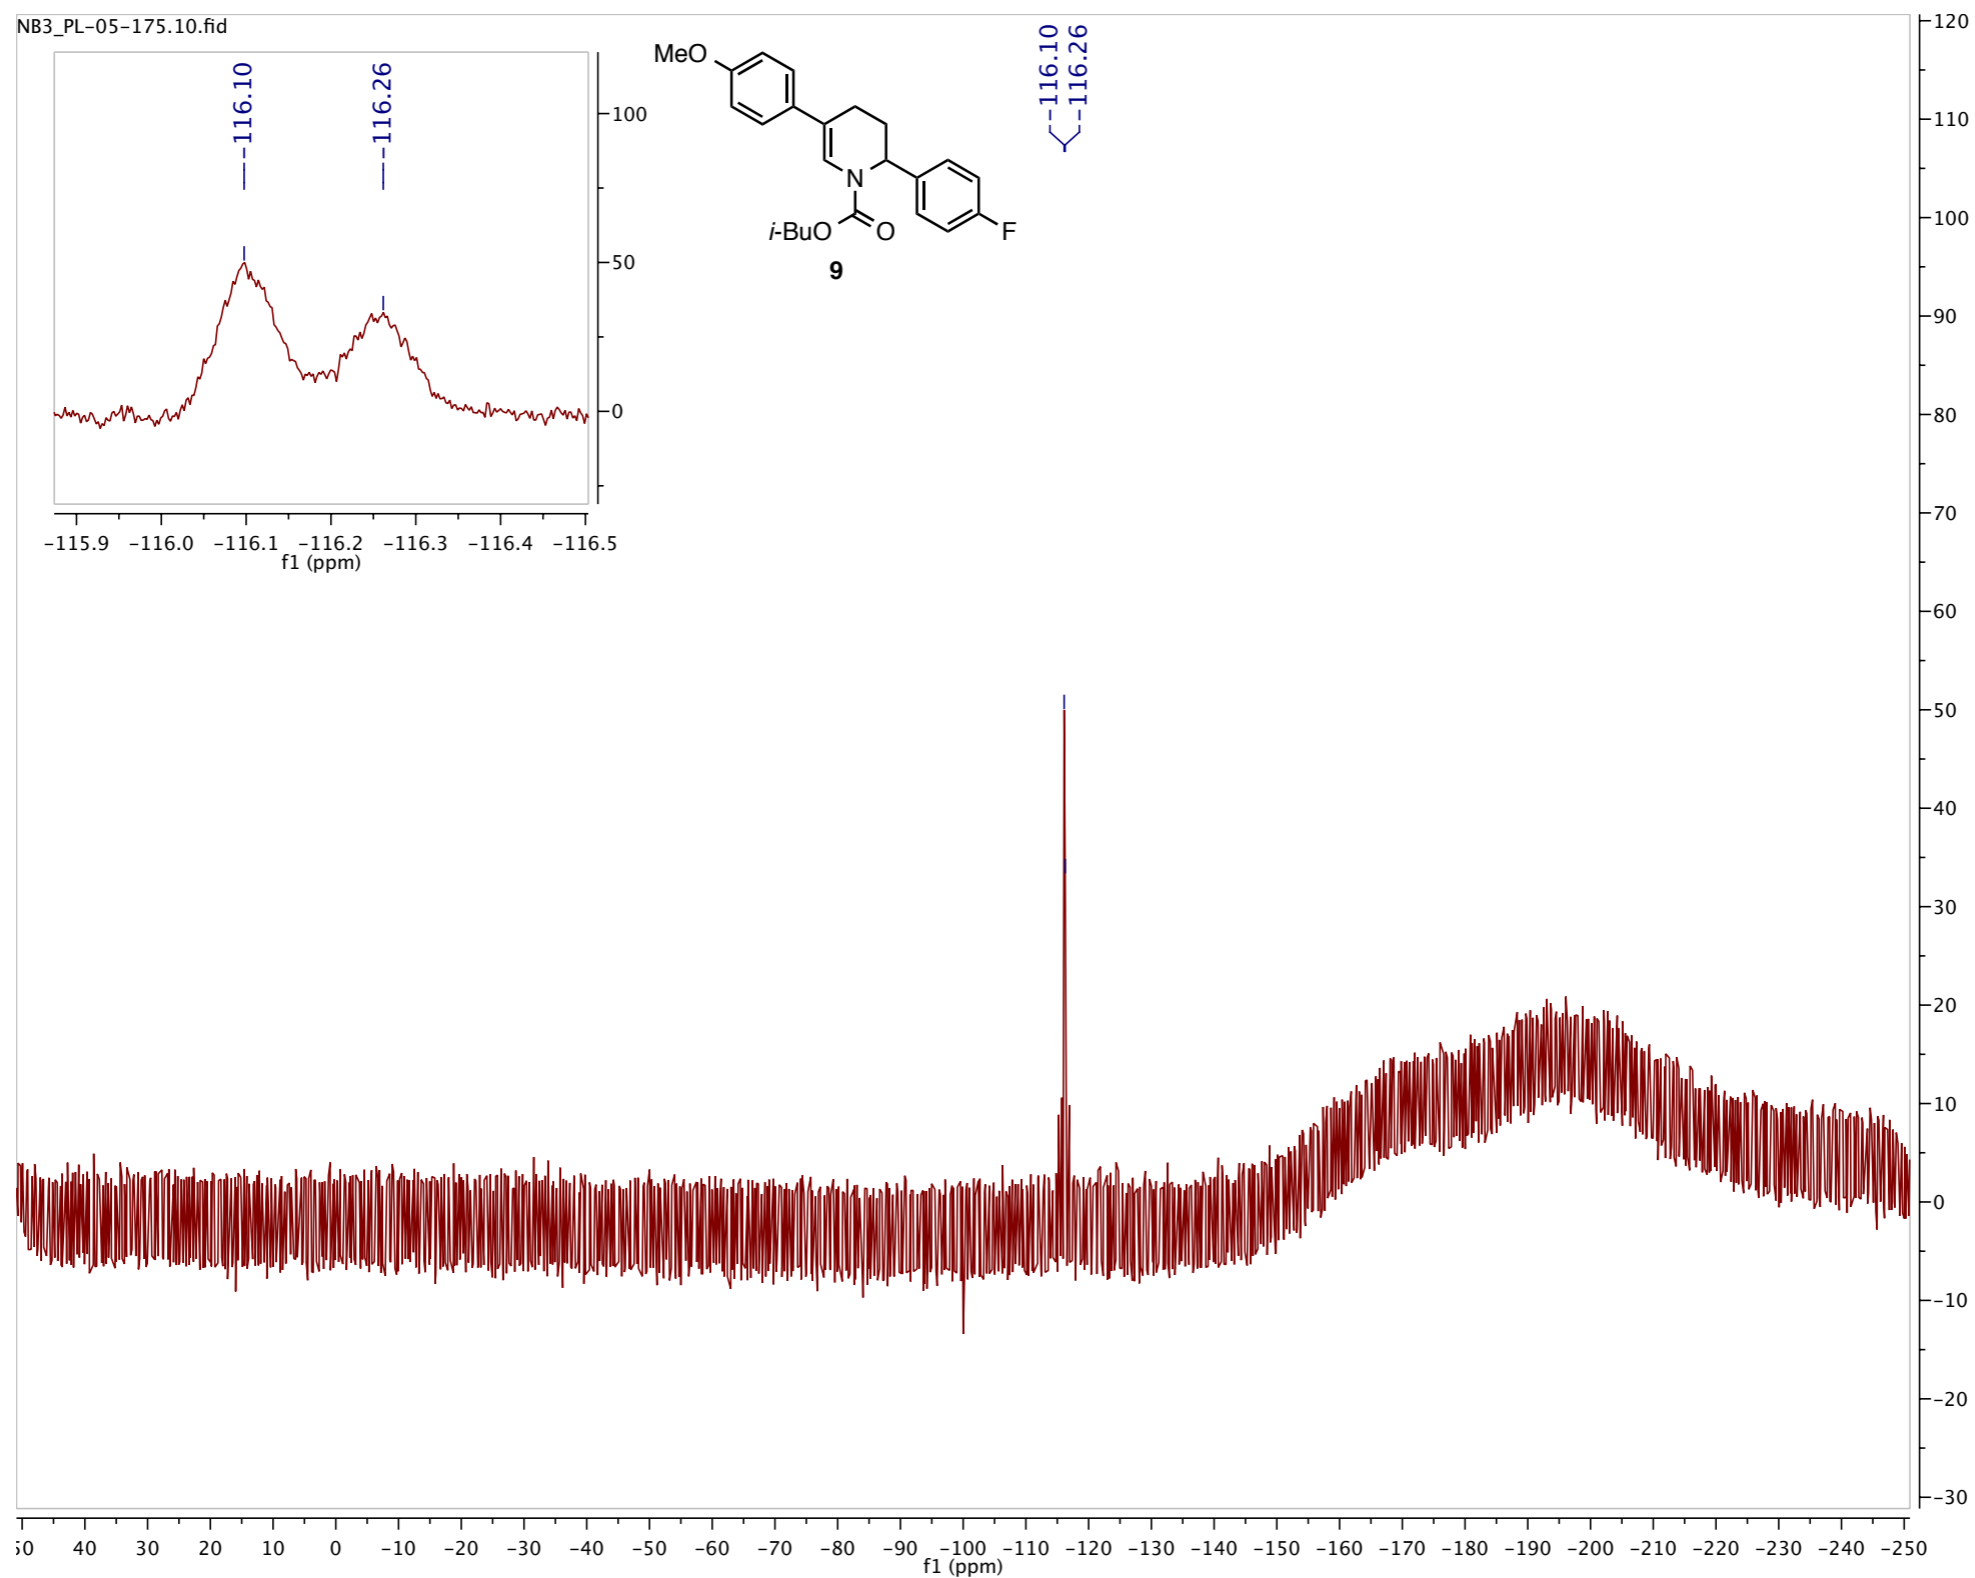

NB3\_PL-05-244\_crude.11.fid

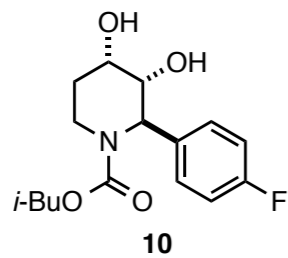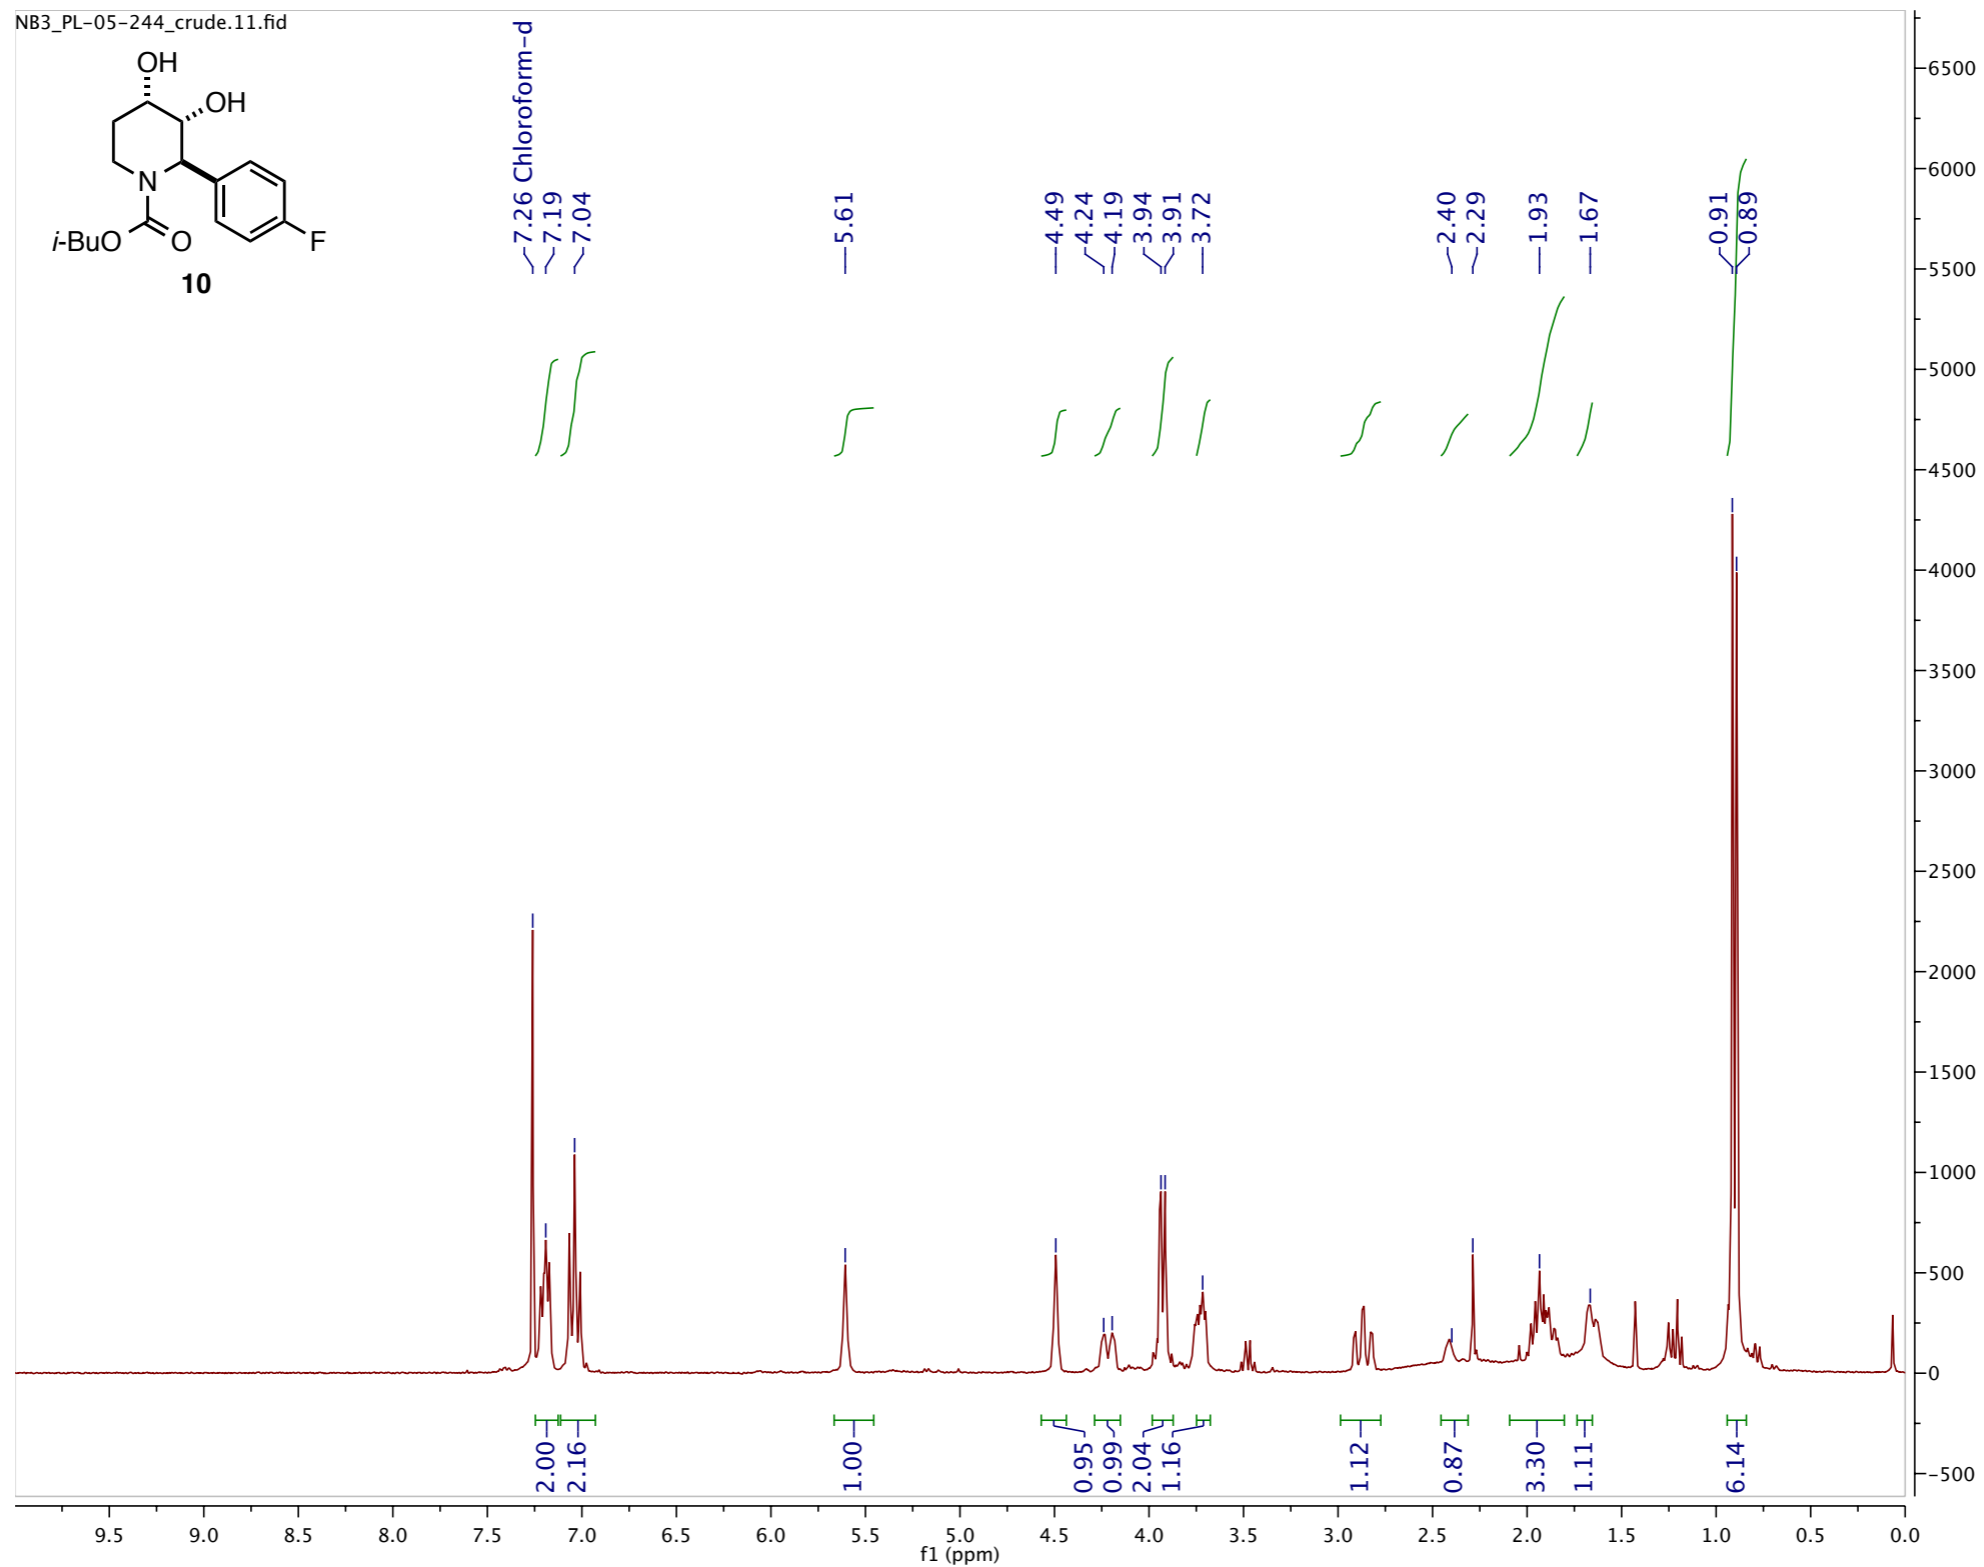

A2\_13-PL-05-238b\_carbon.10.fid  
C13CPDp1.PU CDCl3 /opt/topspin3.0 jlutz 13

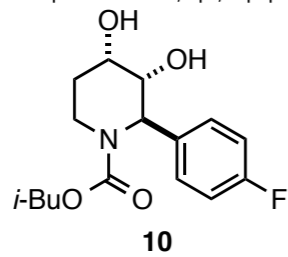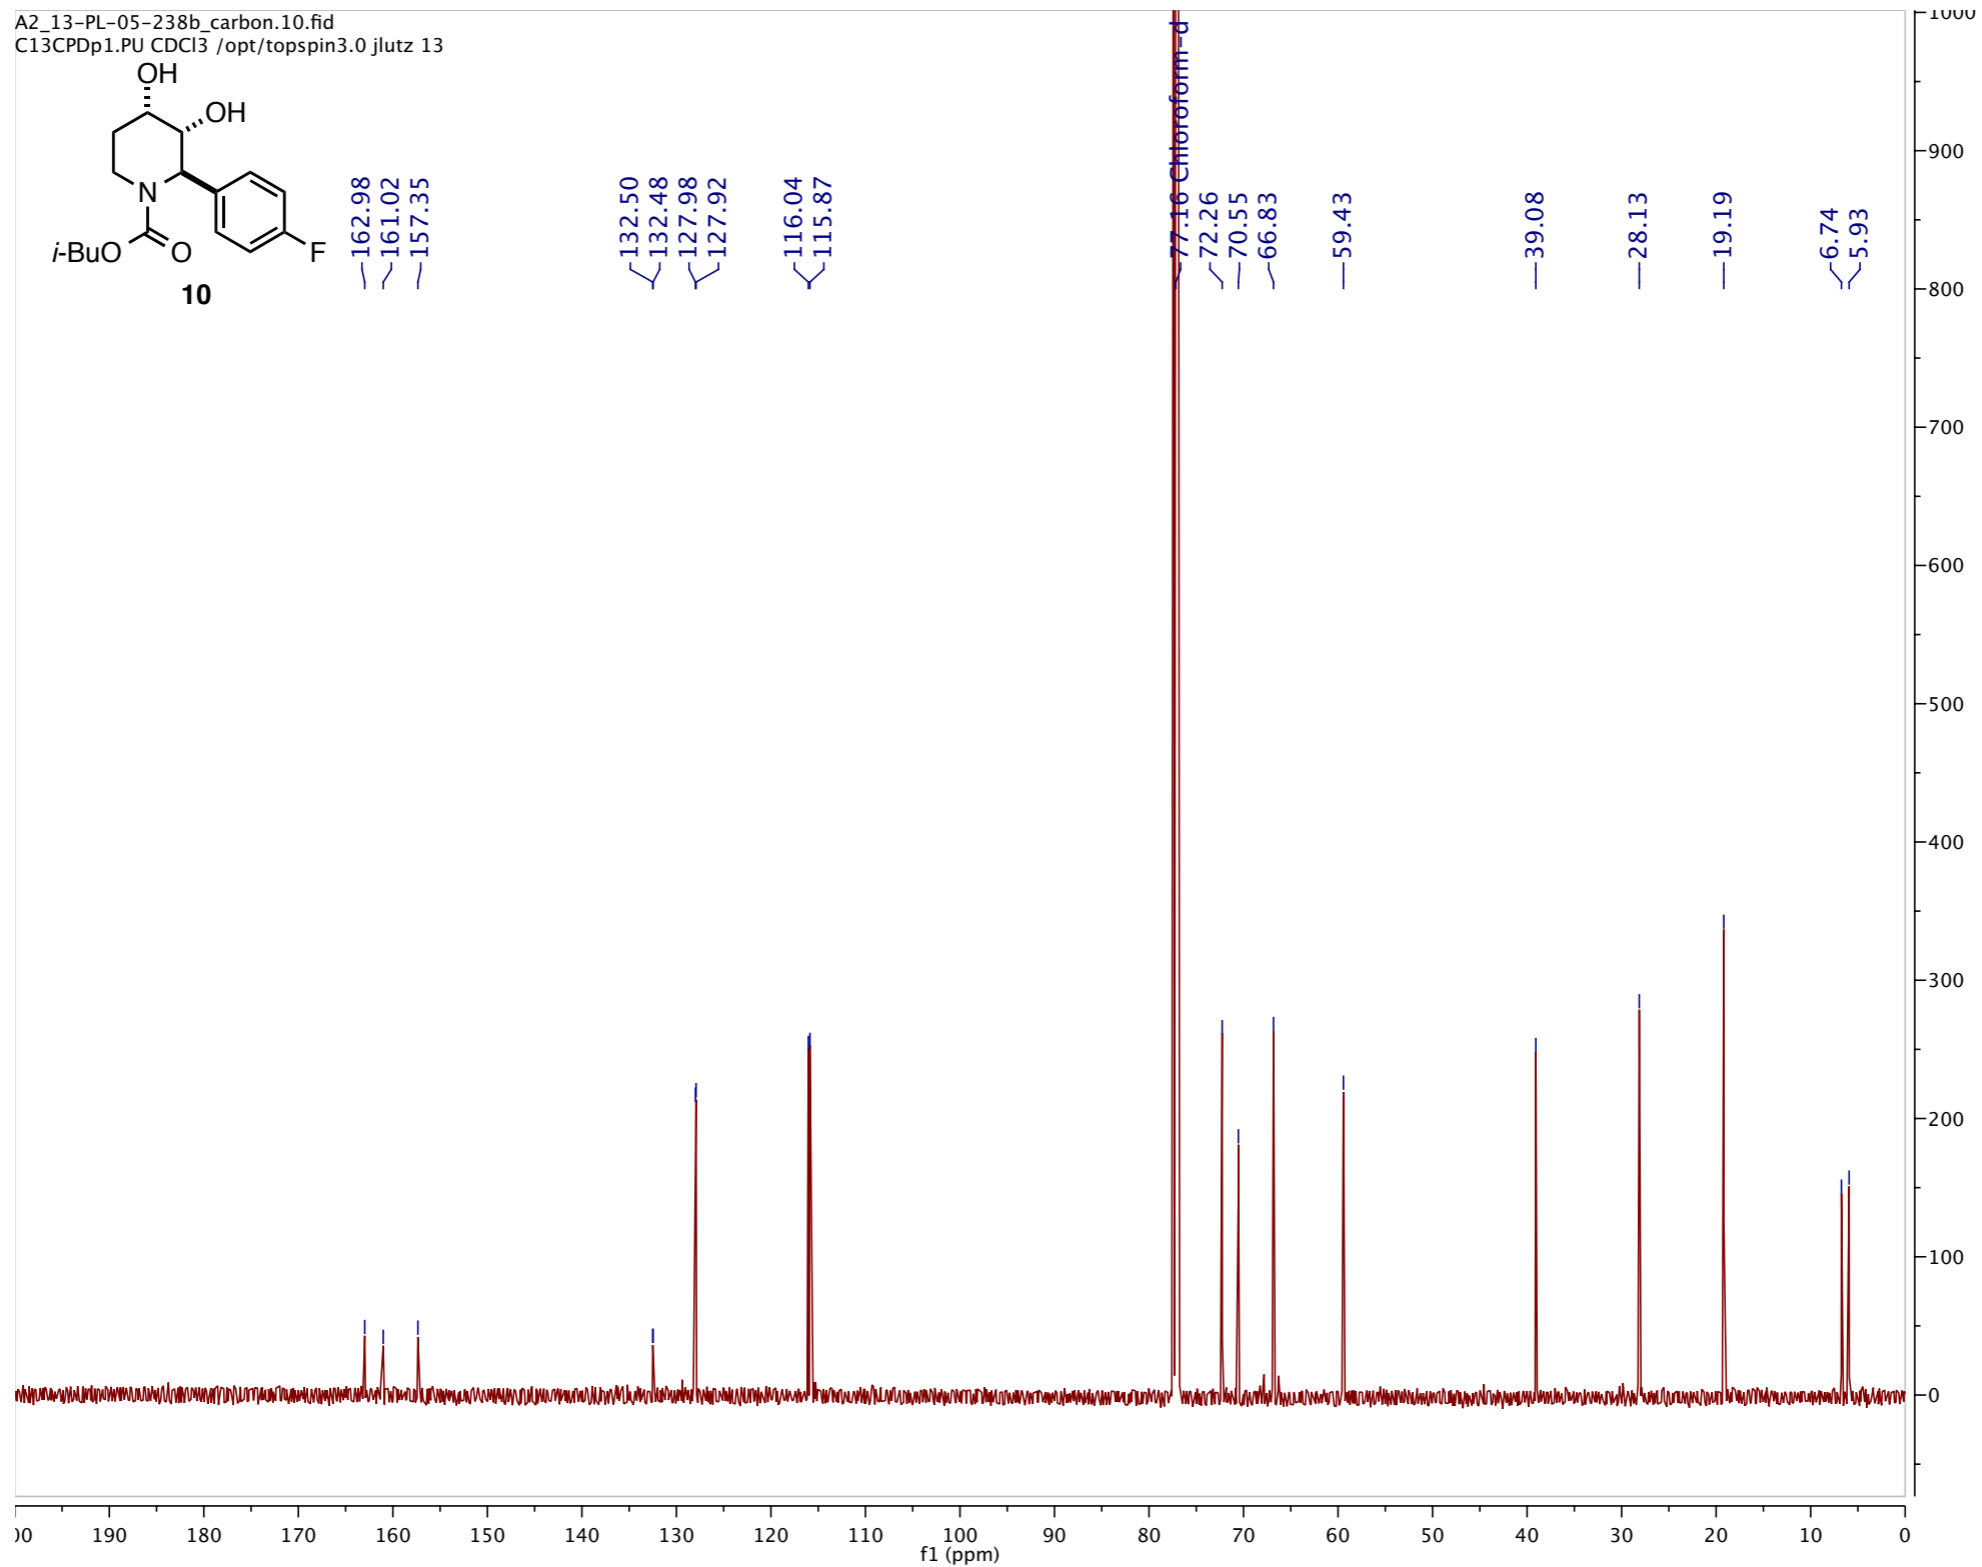

125 MHz <sup>13</sup>C-NMR spectrum of **10** in CDCl<sub>3</sub>

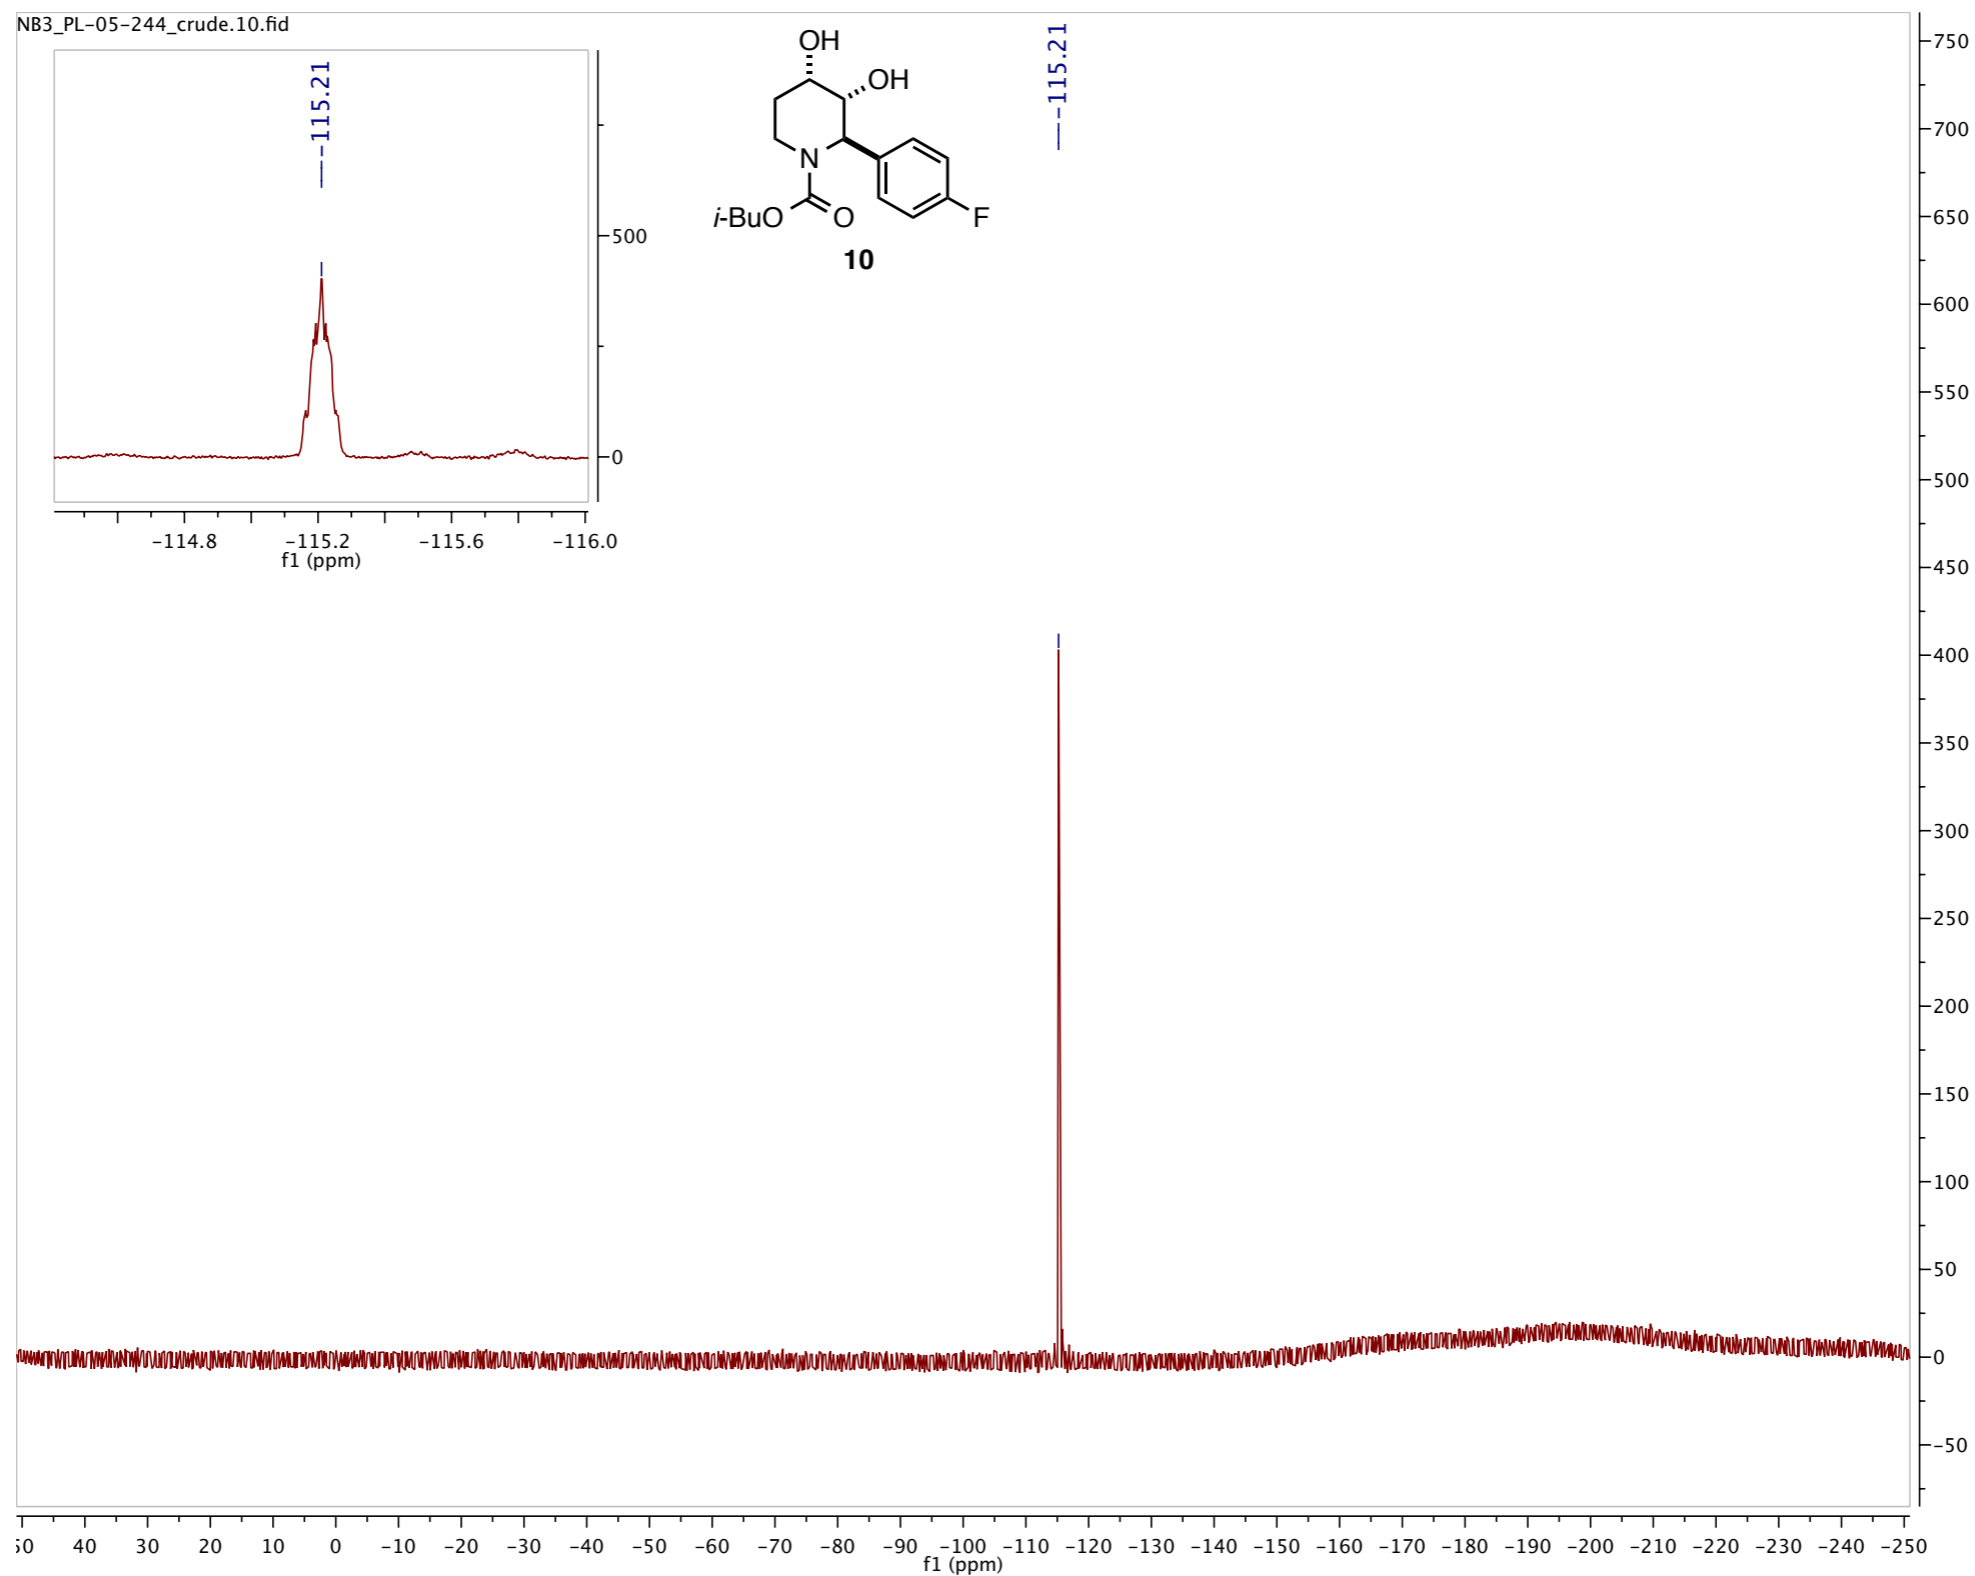

NB3\_PL-05-174\_crude.11.fid

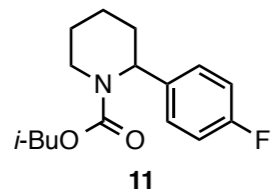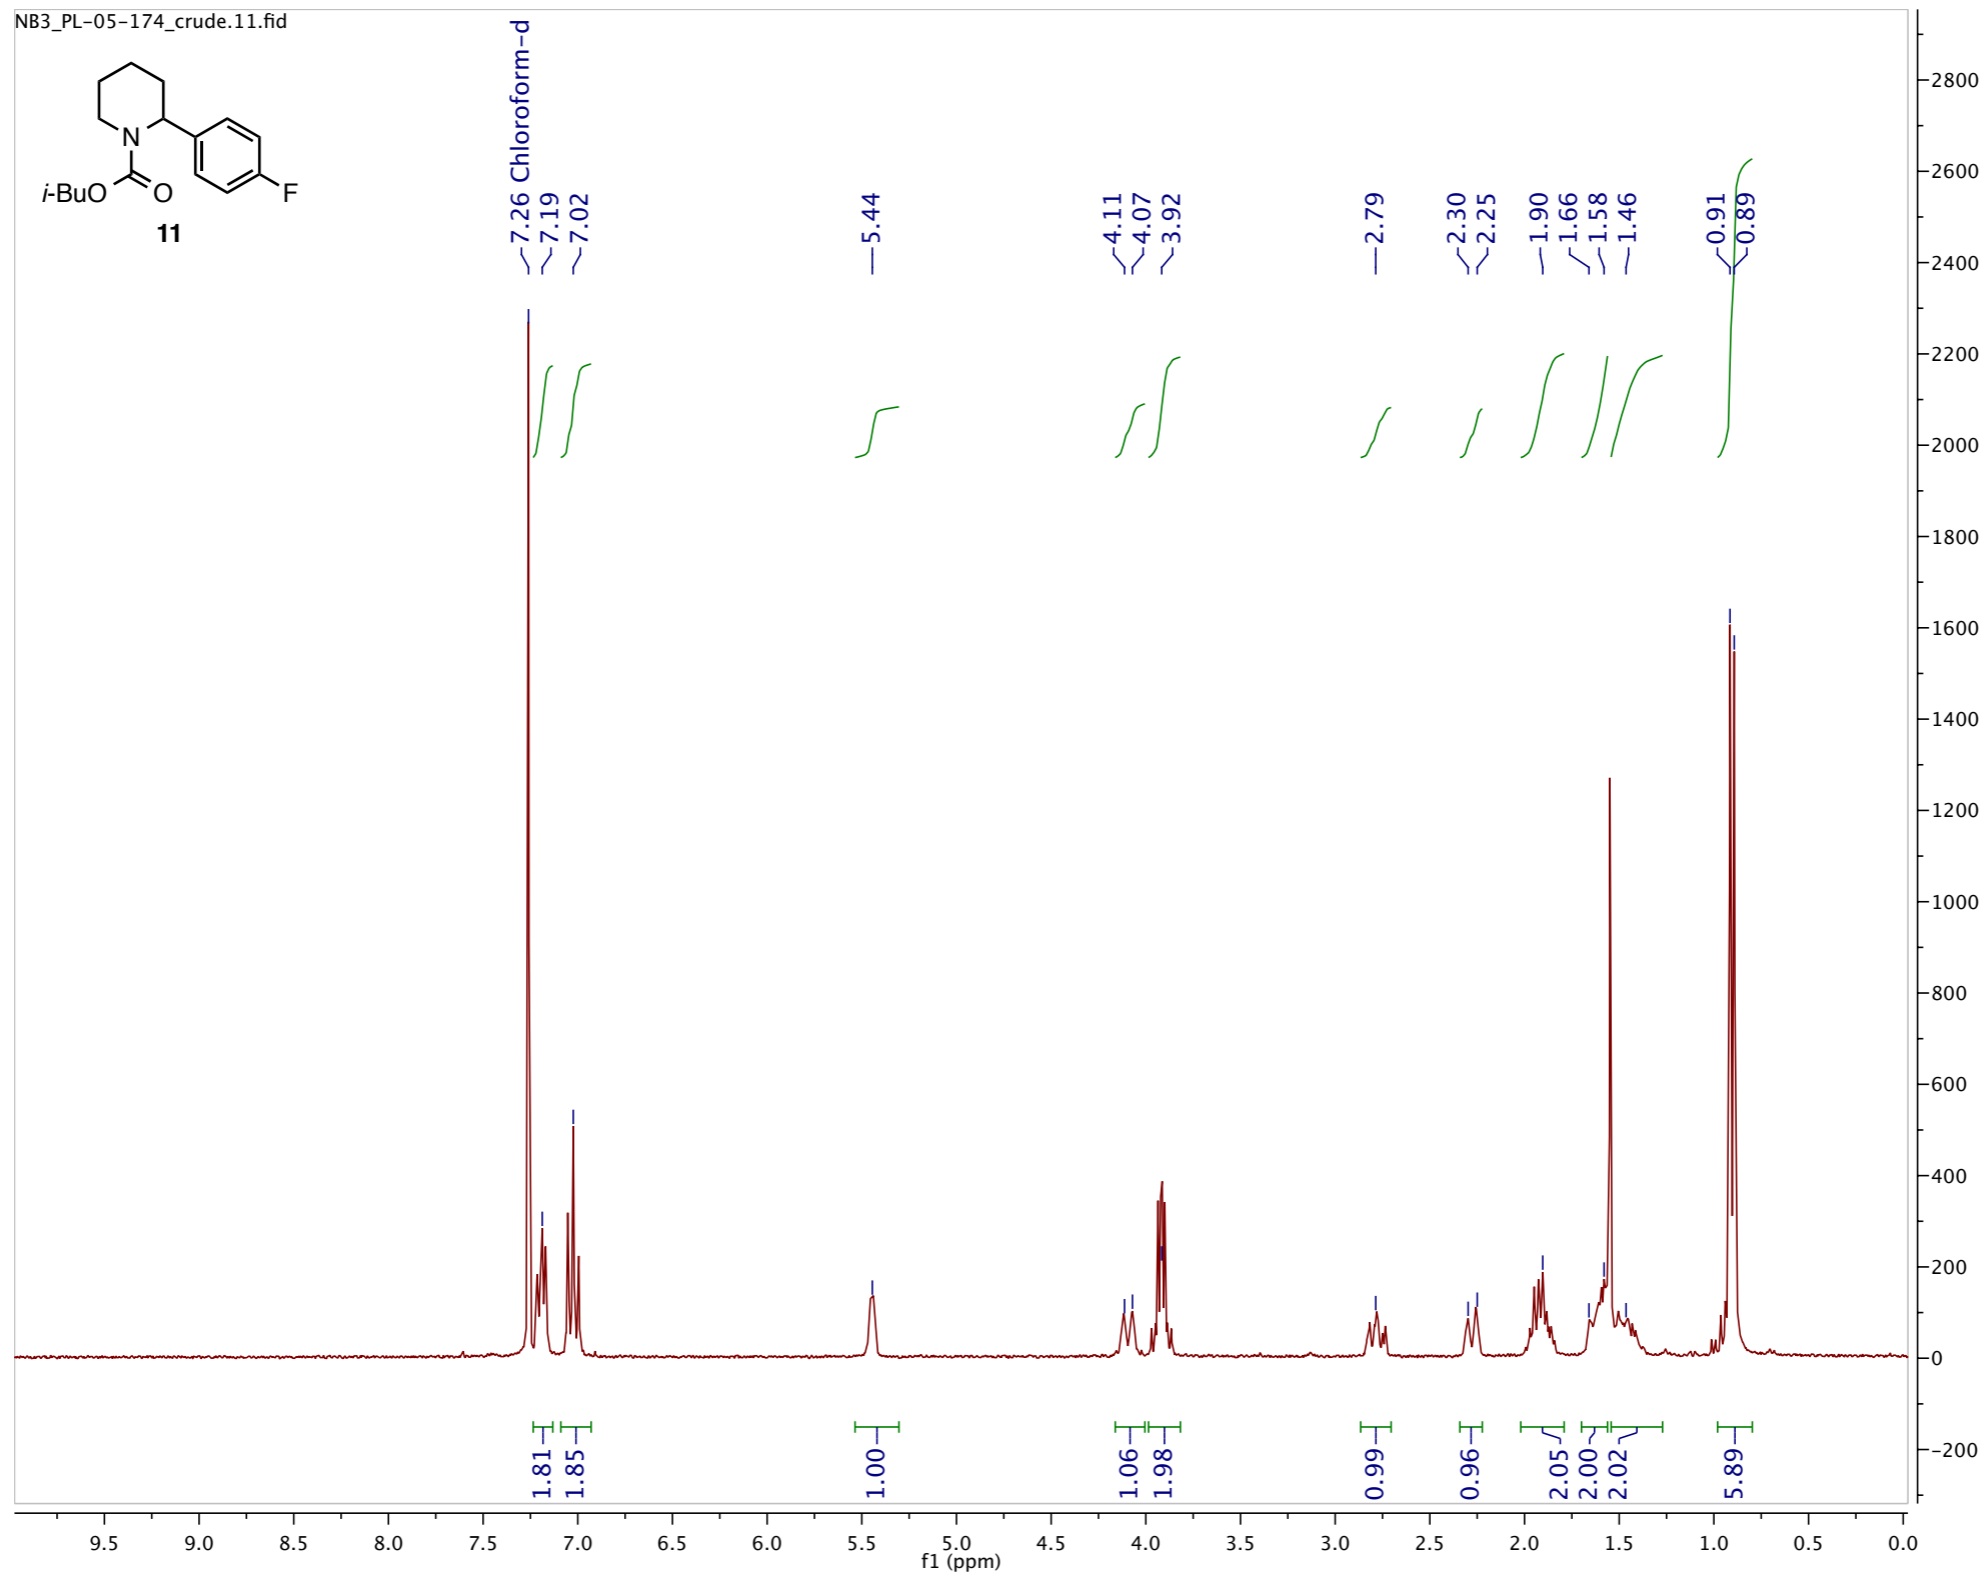



A2\_59-PL-05-255\_hivac\_carbon.10.fid  
C13CPDp1.PU CDCl3 /opt/topspin3.0 jlutz 59

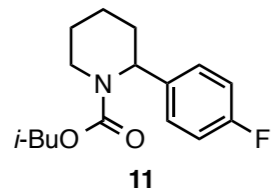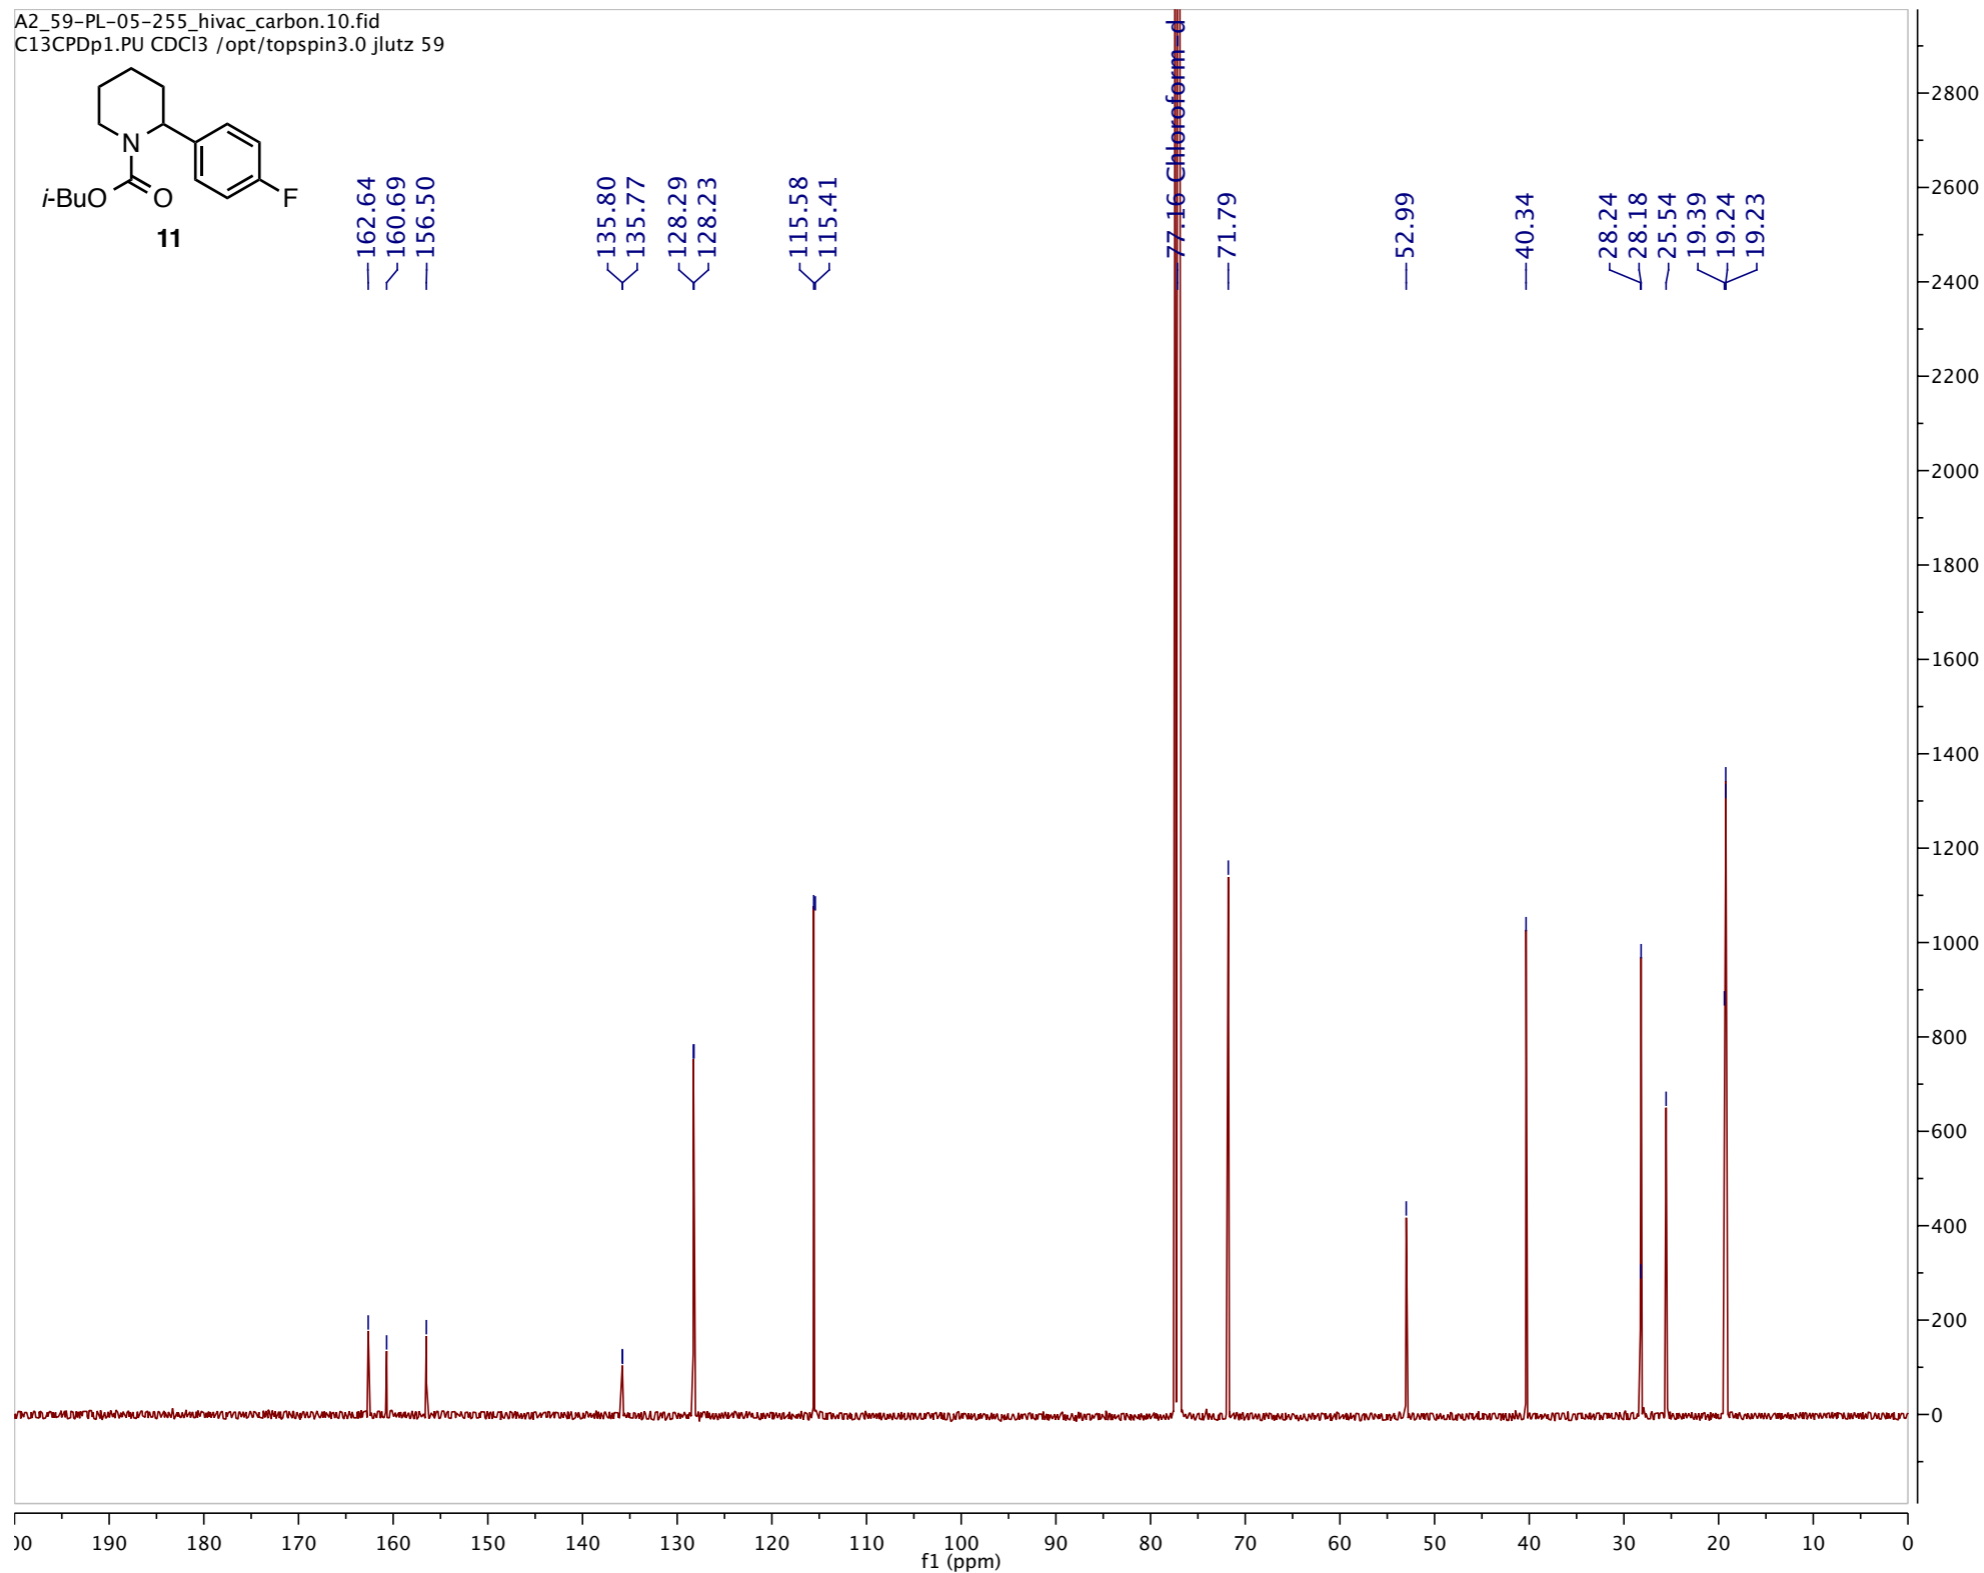

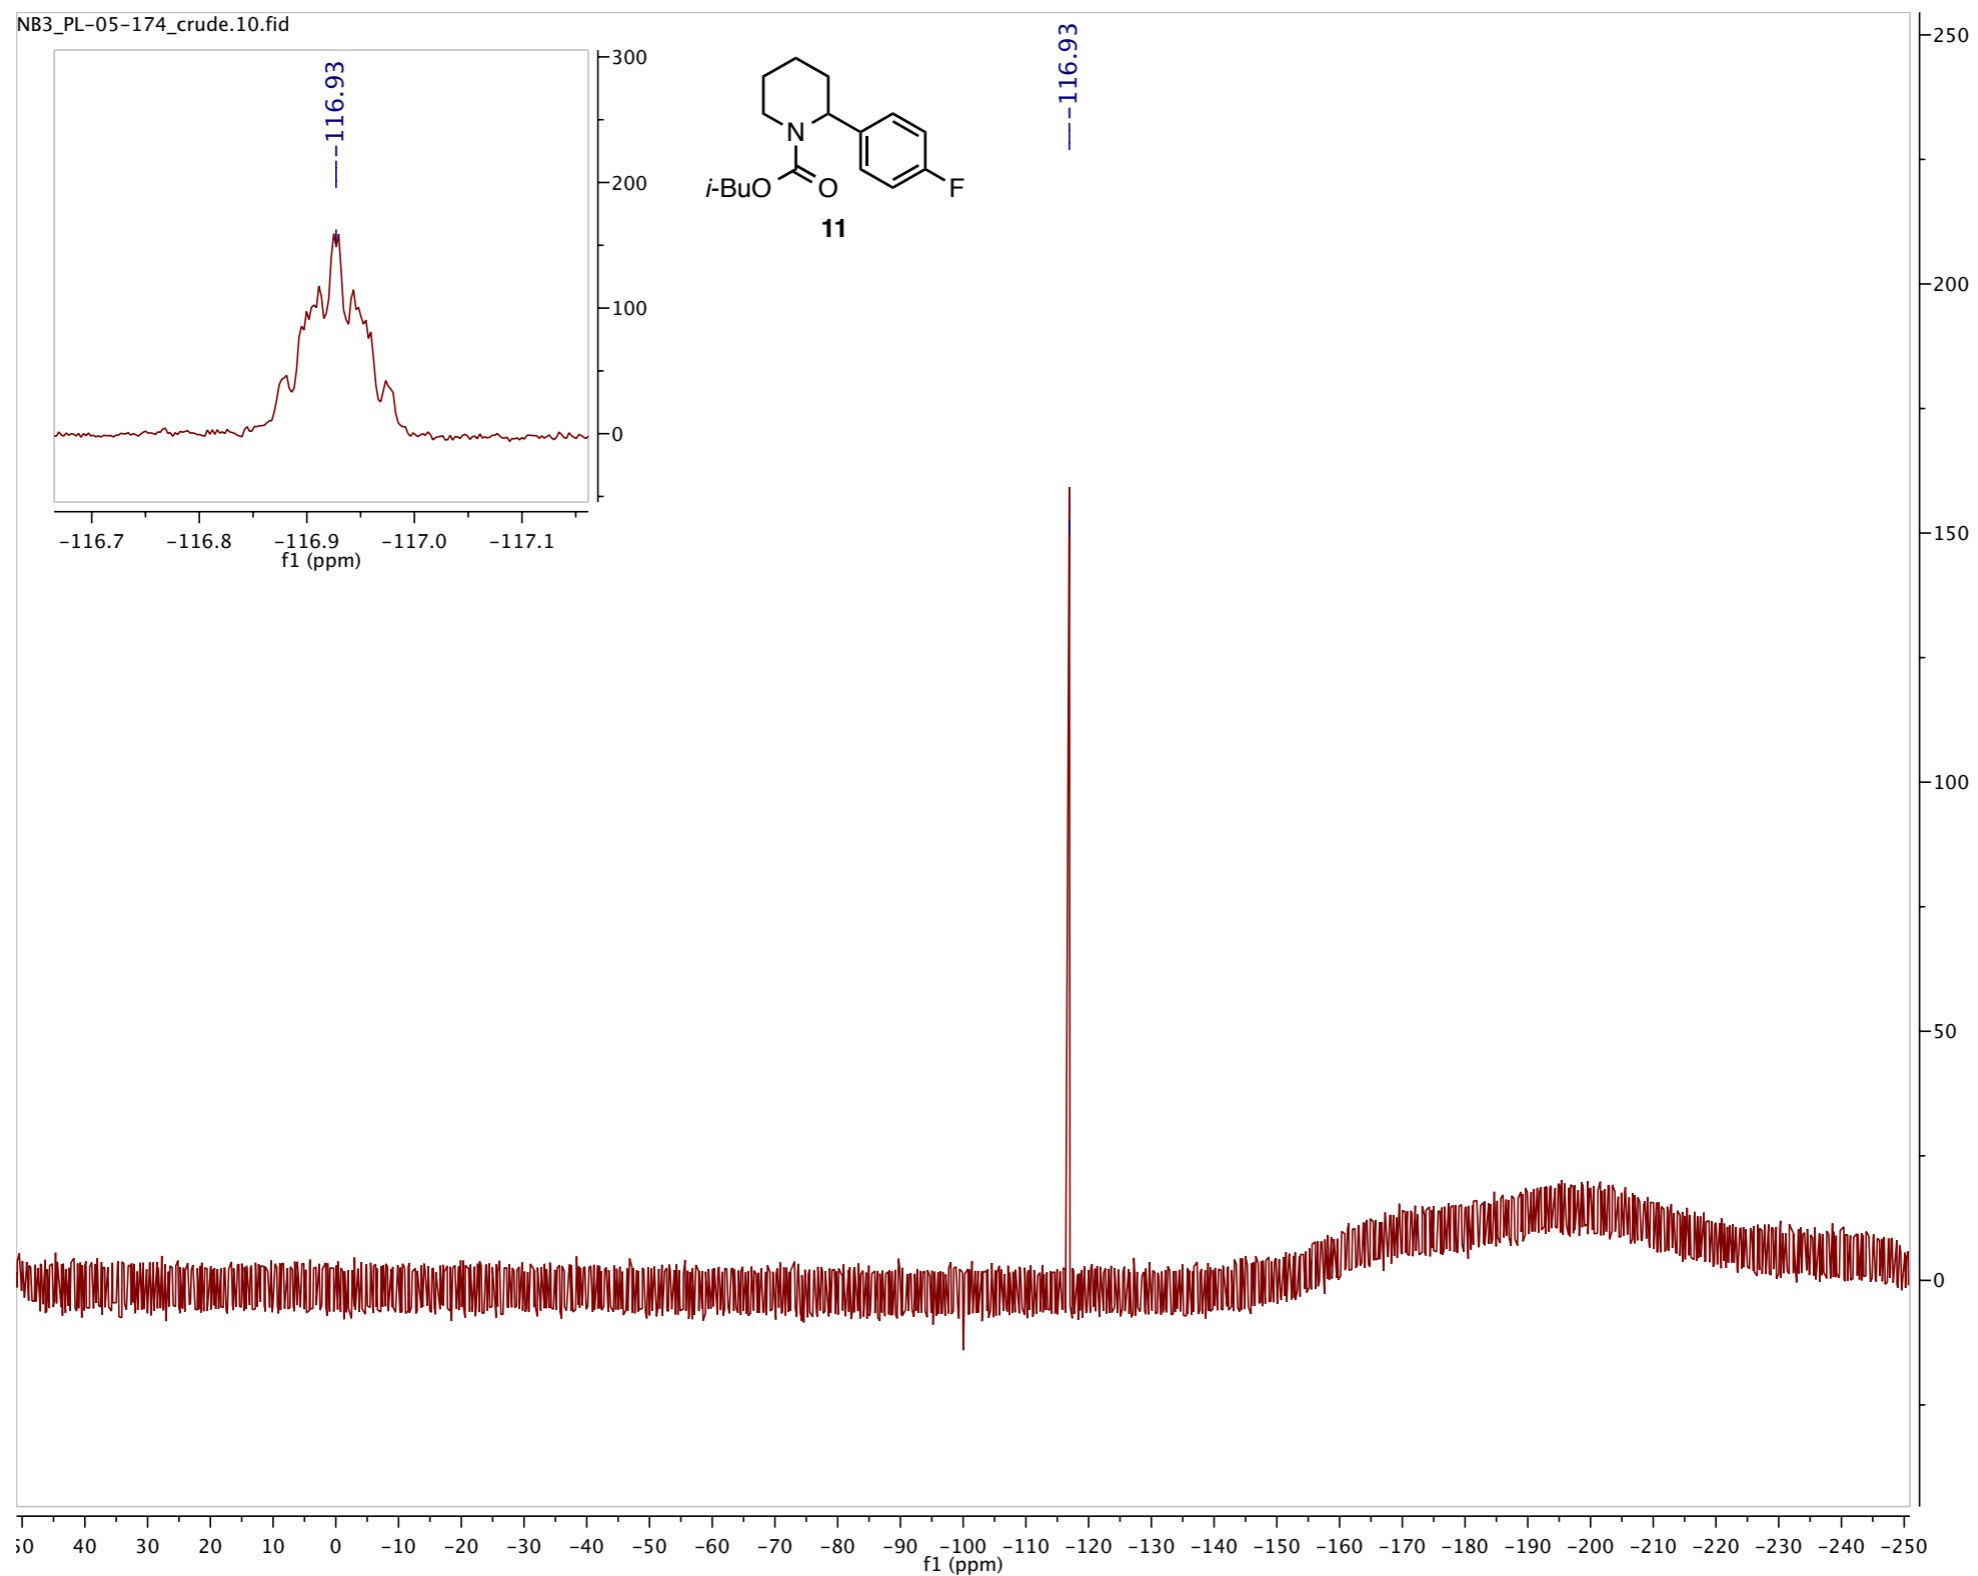

NB3\_PL-05-200.11.fid

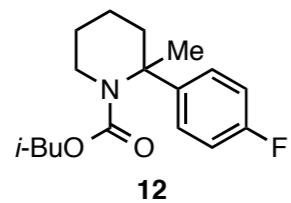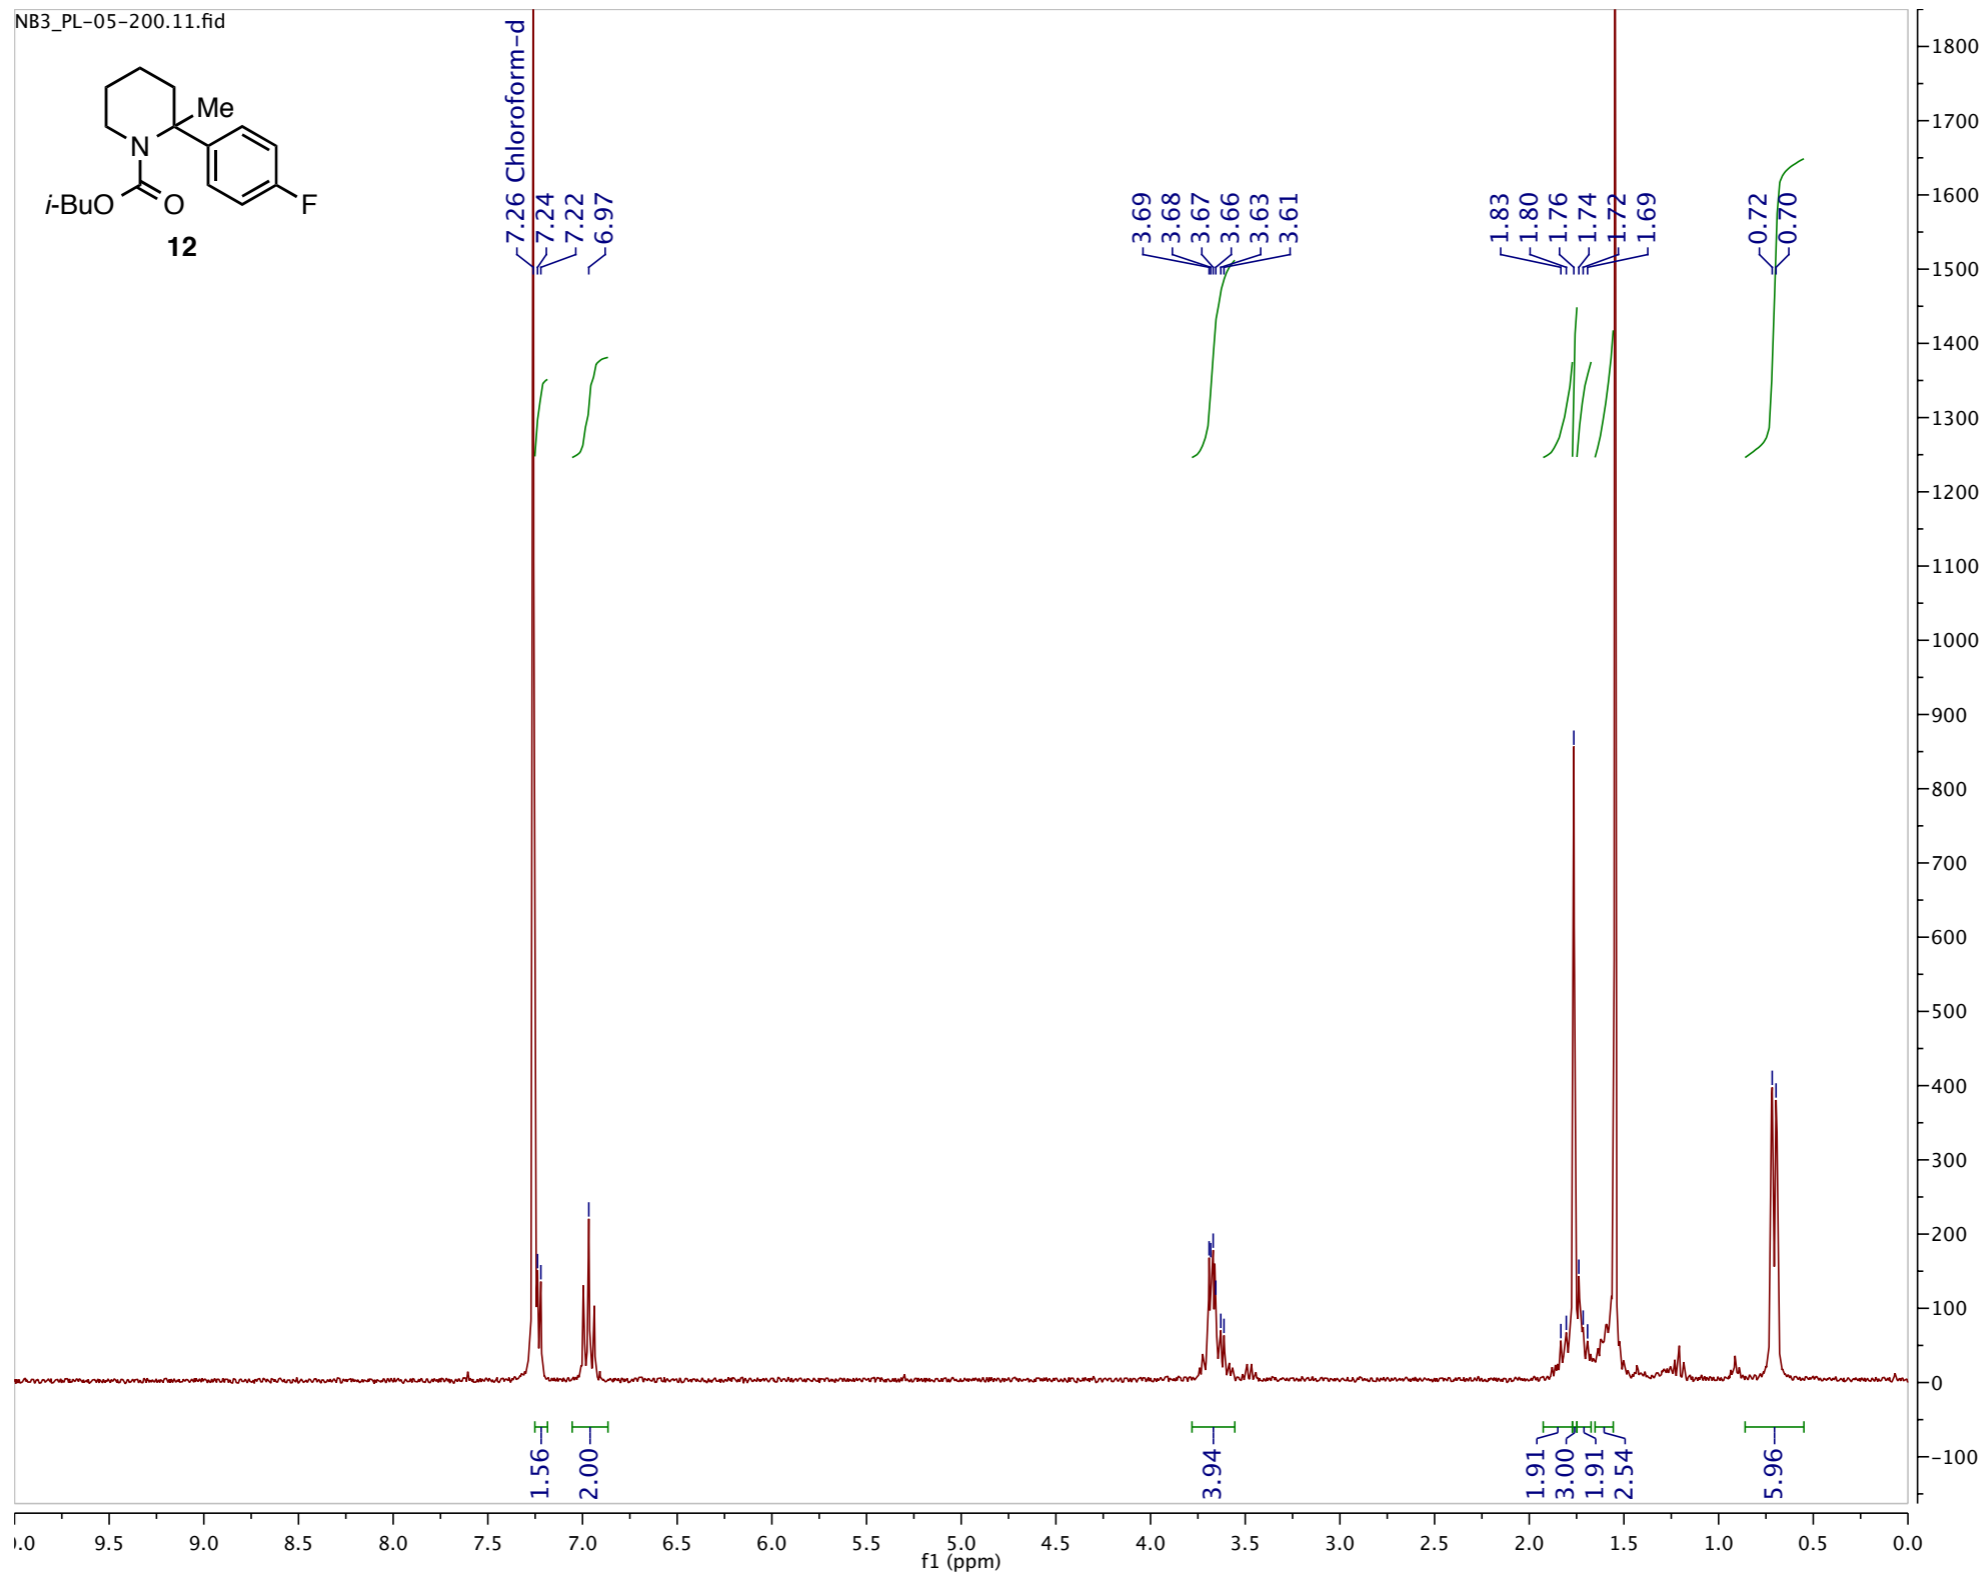

A2\_26-PL-05-189\_carbon.10.fid  
C13CPDp1.PU CDCl3 /opt/topspin3.0 jlutz 26

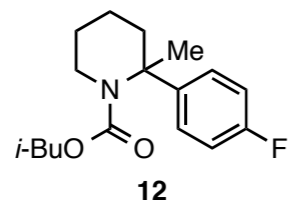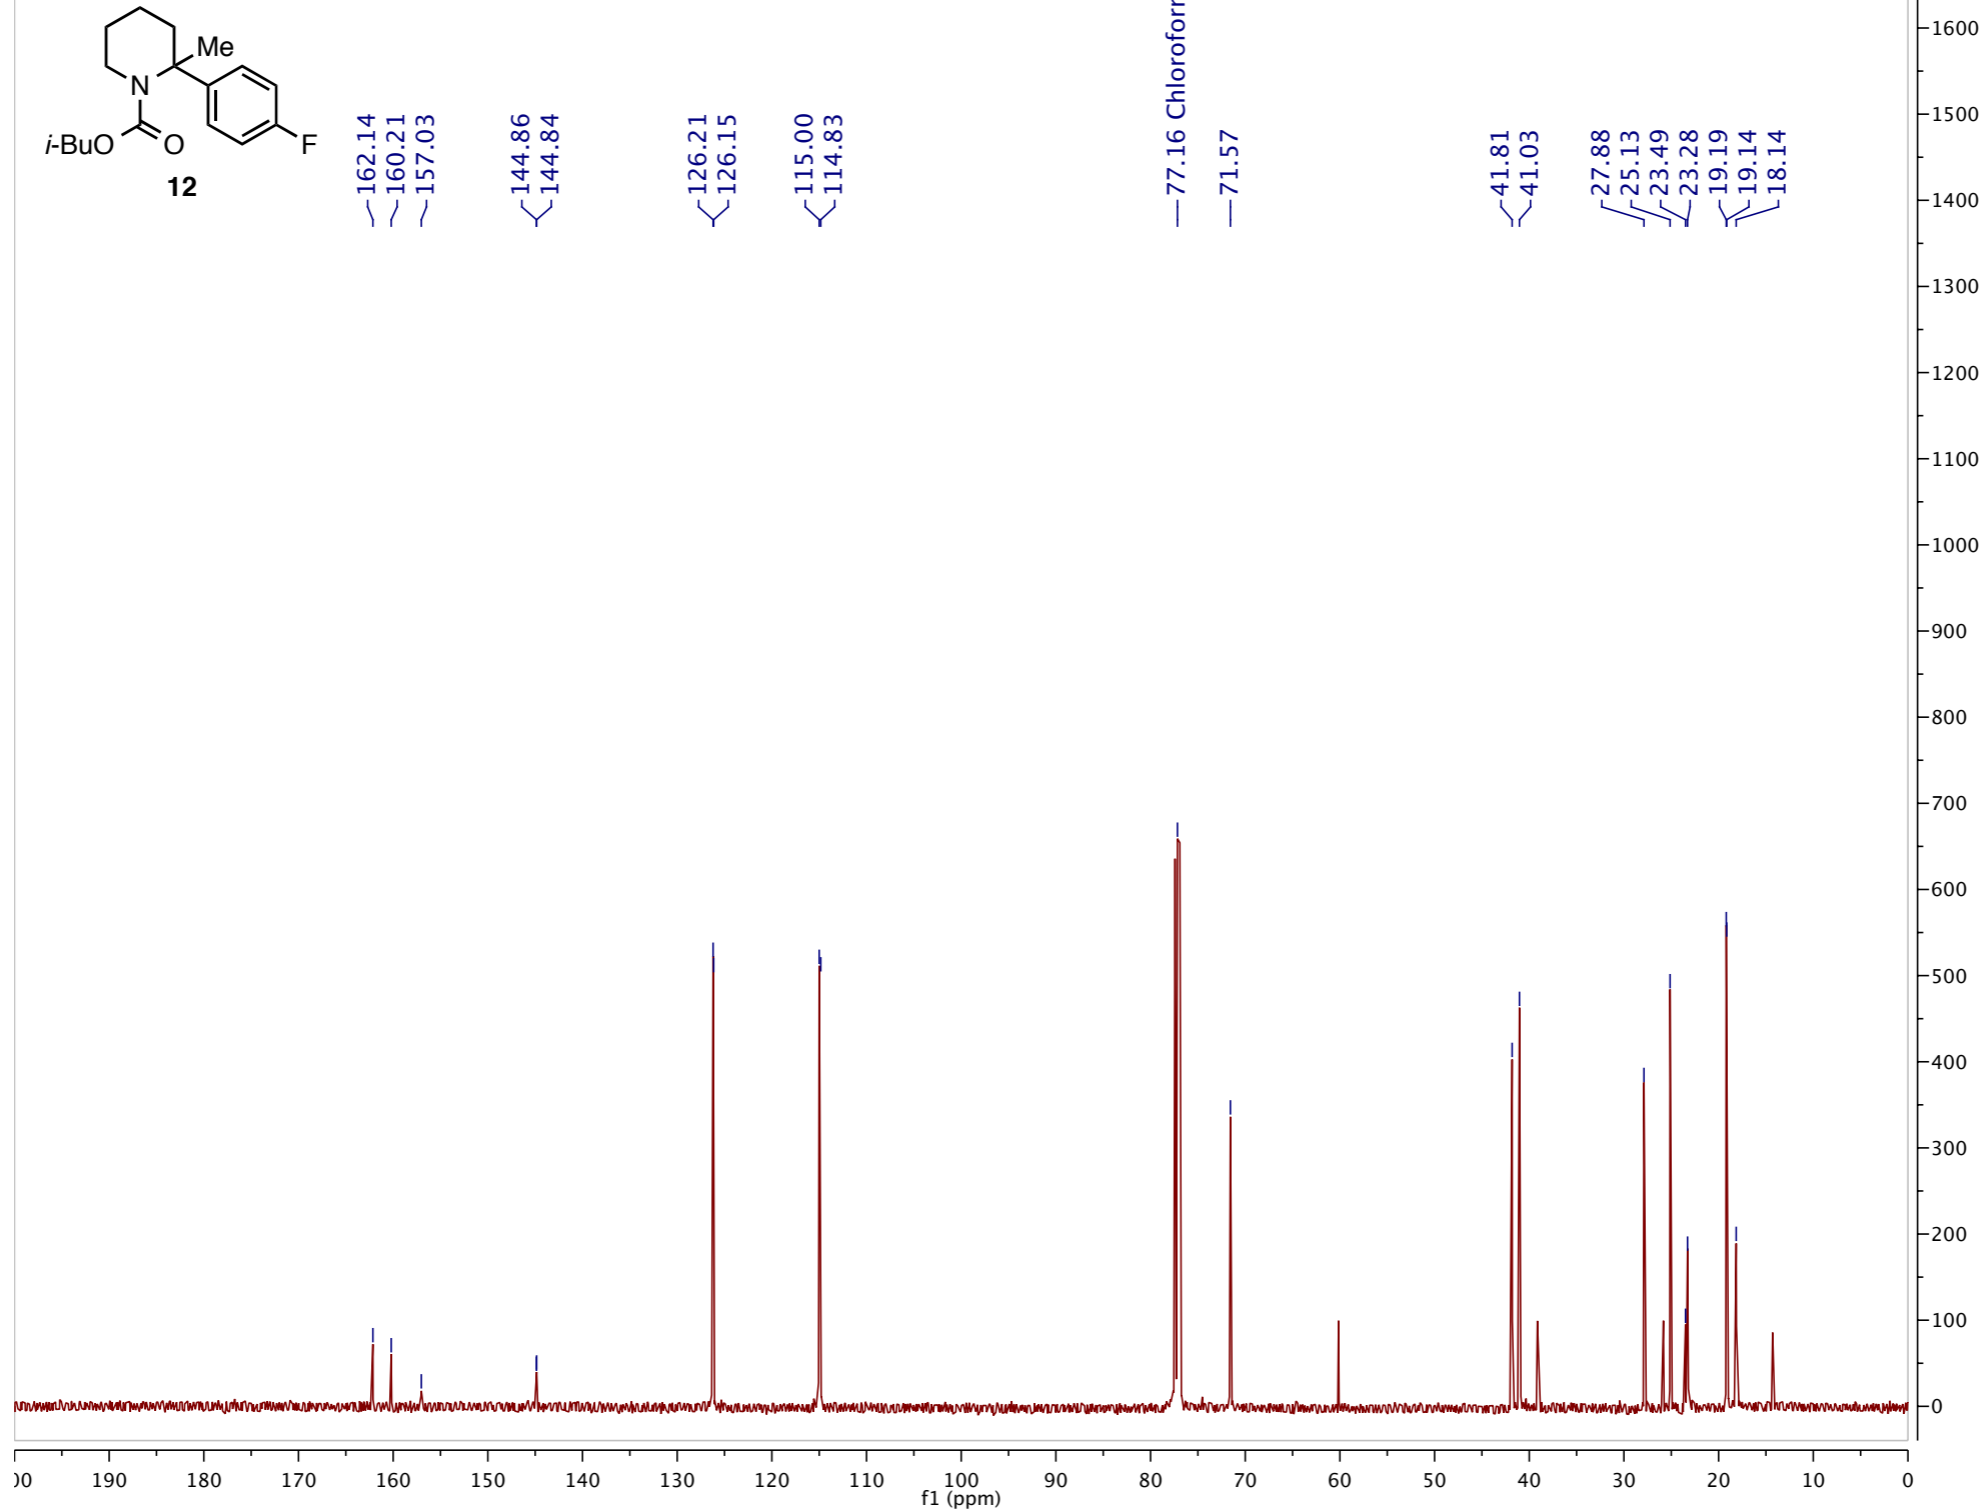

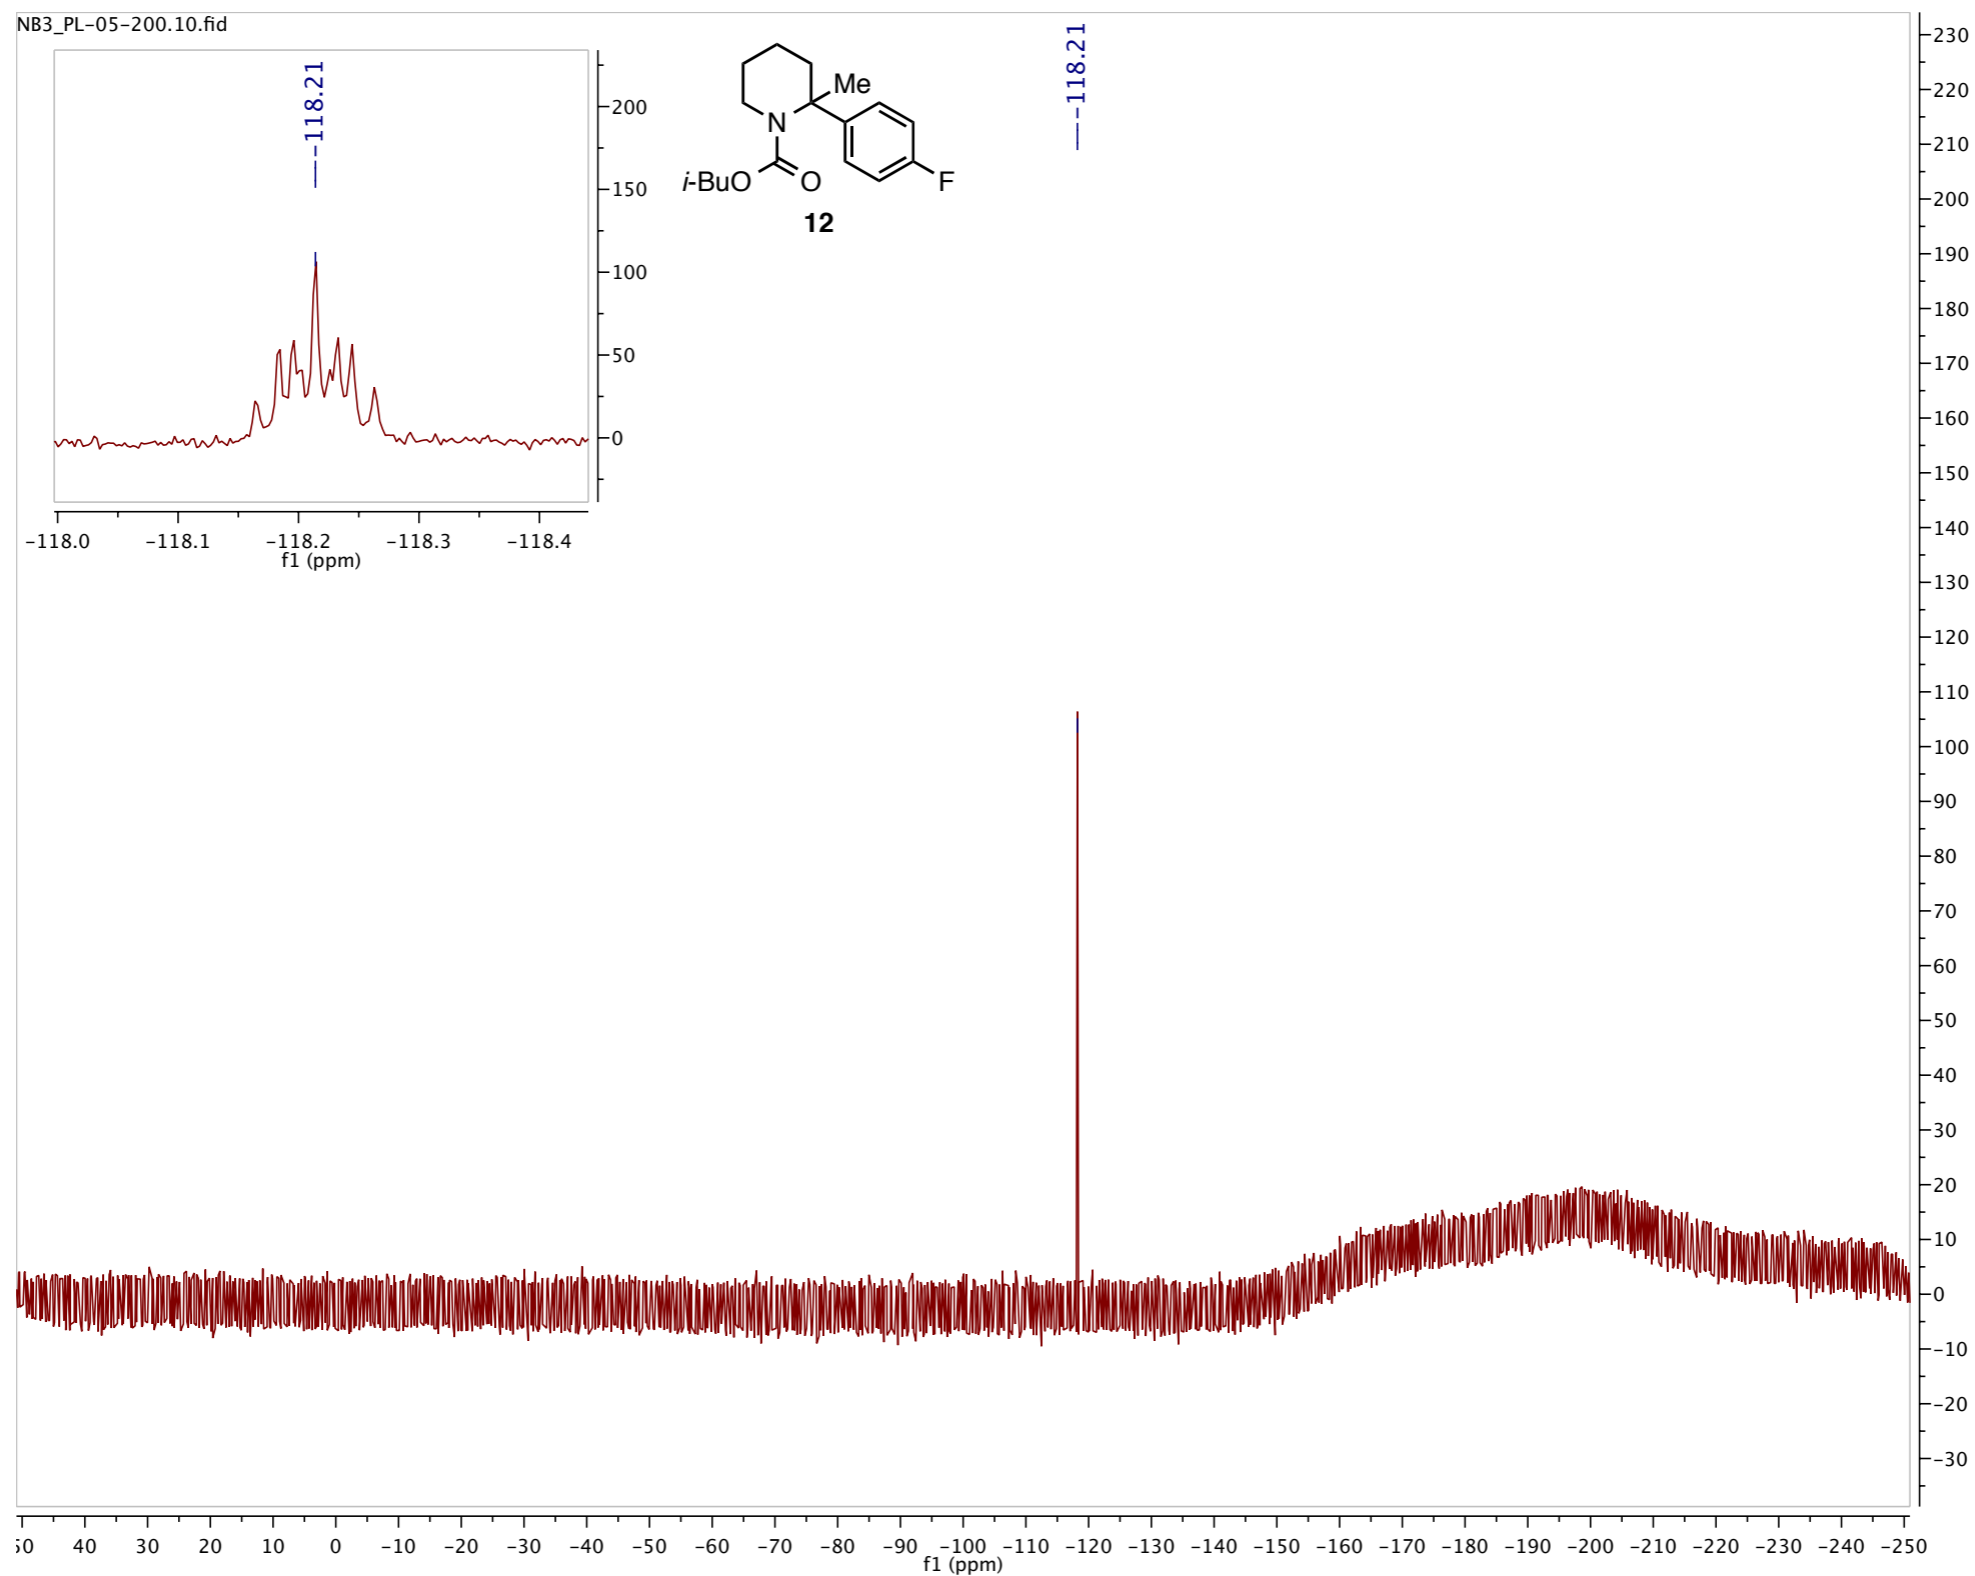

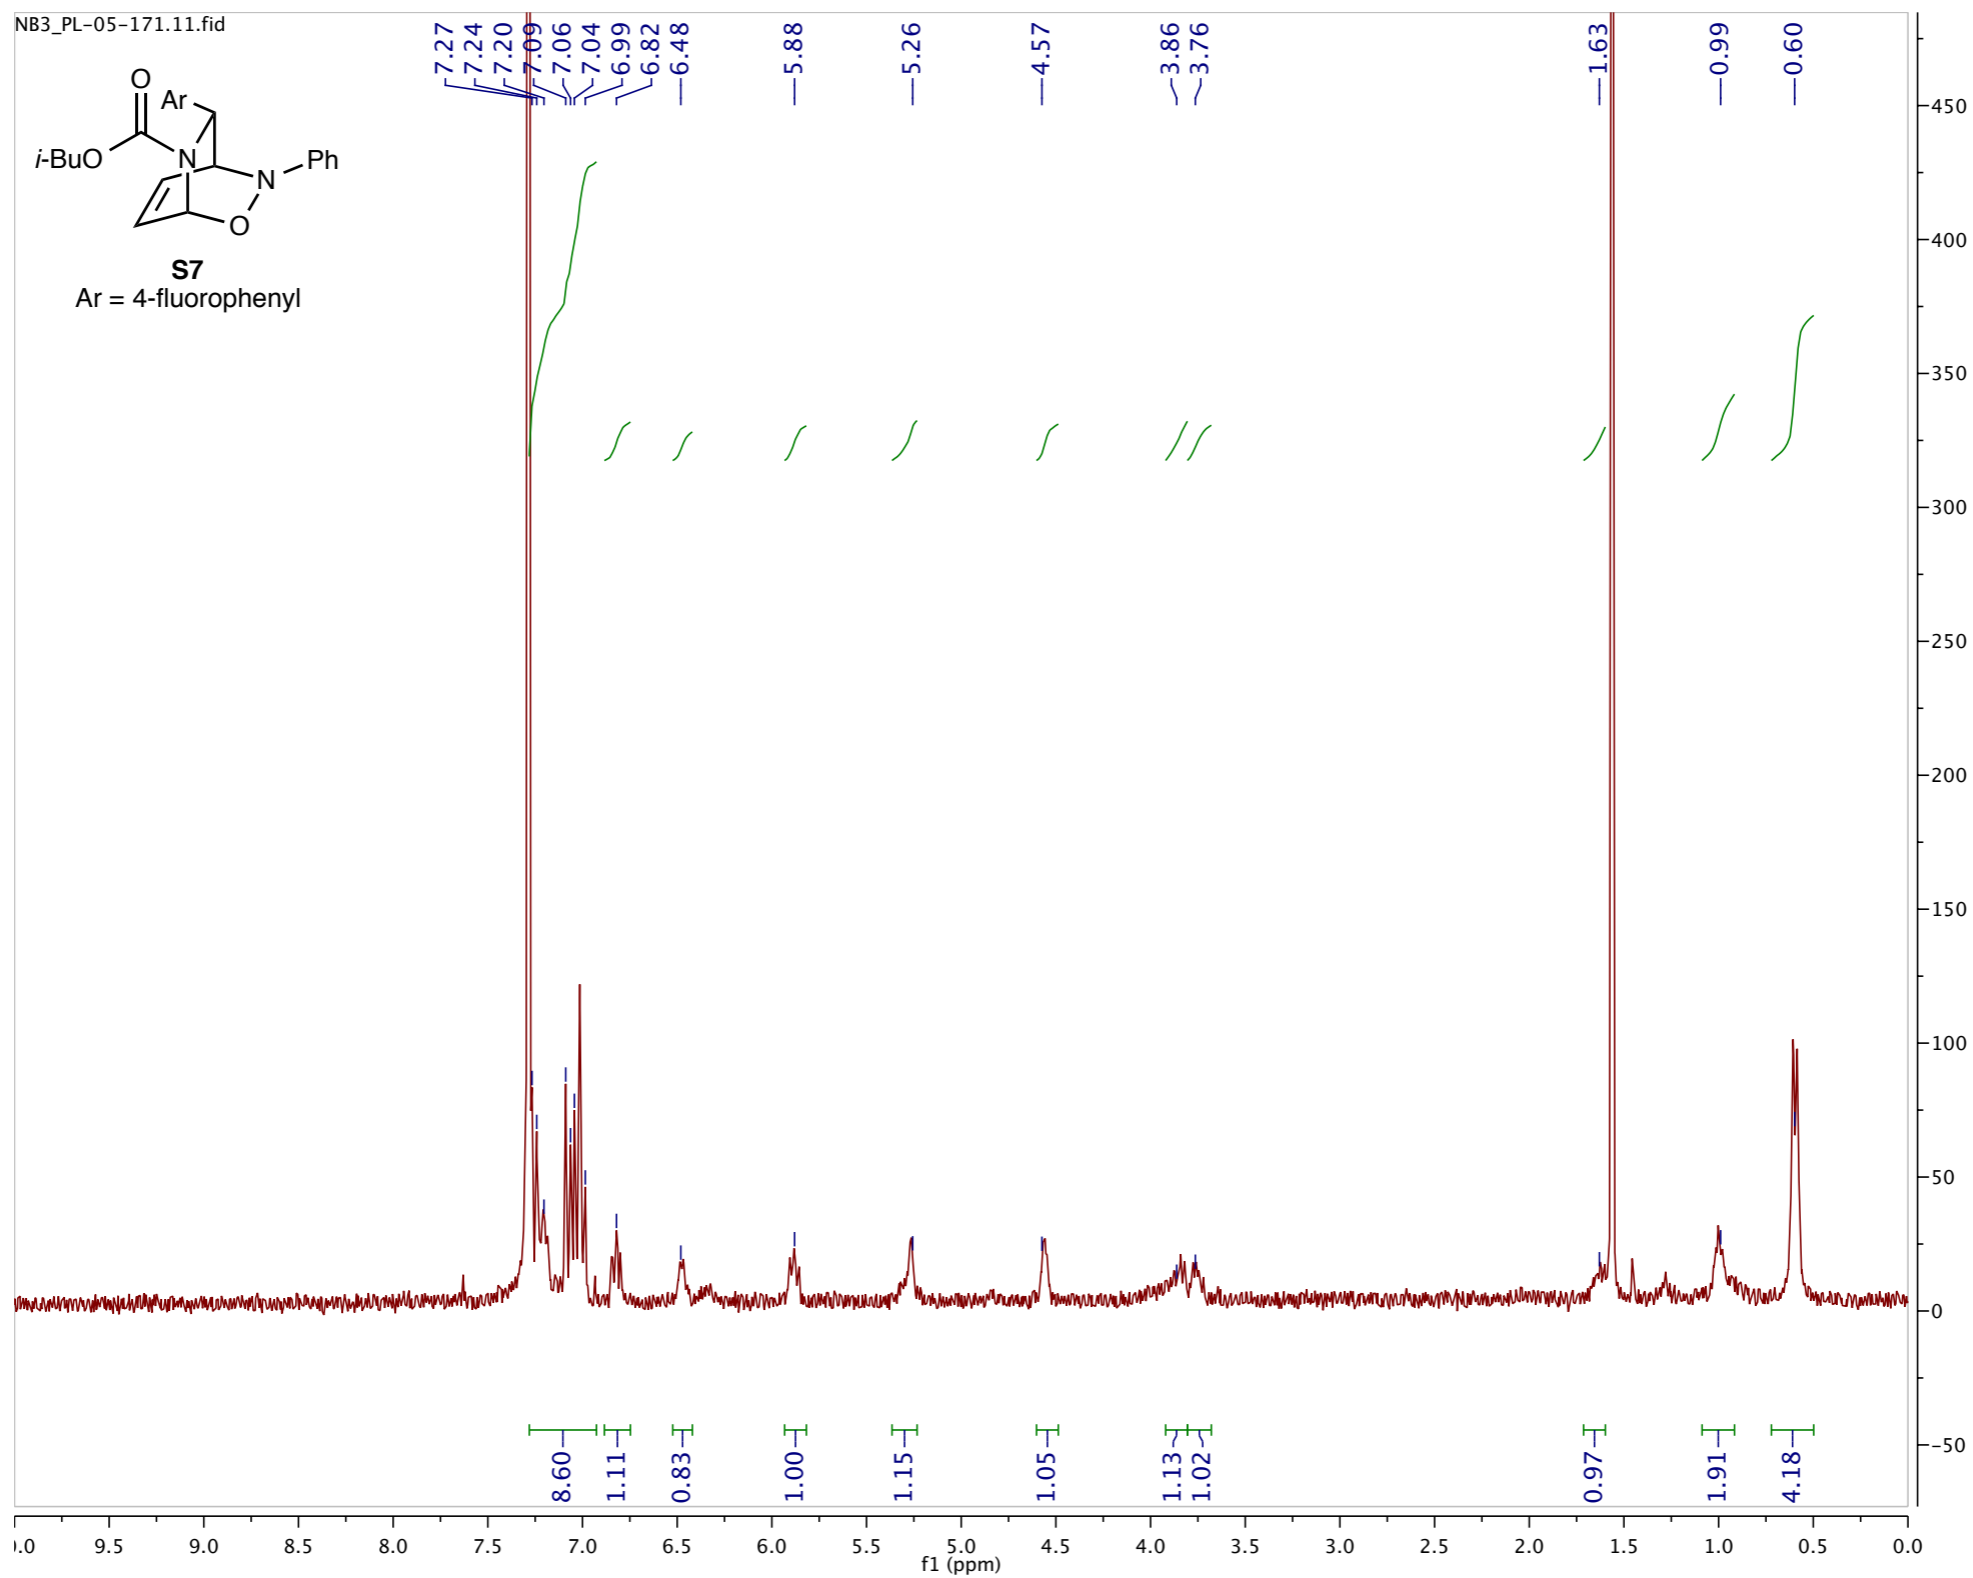

NB3\_PL-04-062b.10.fid

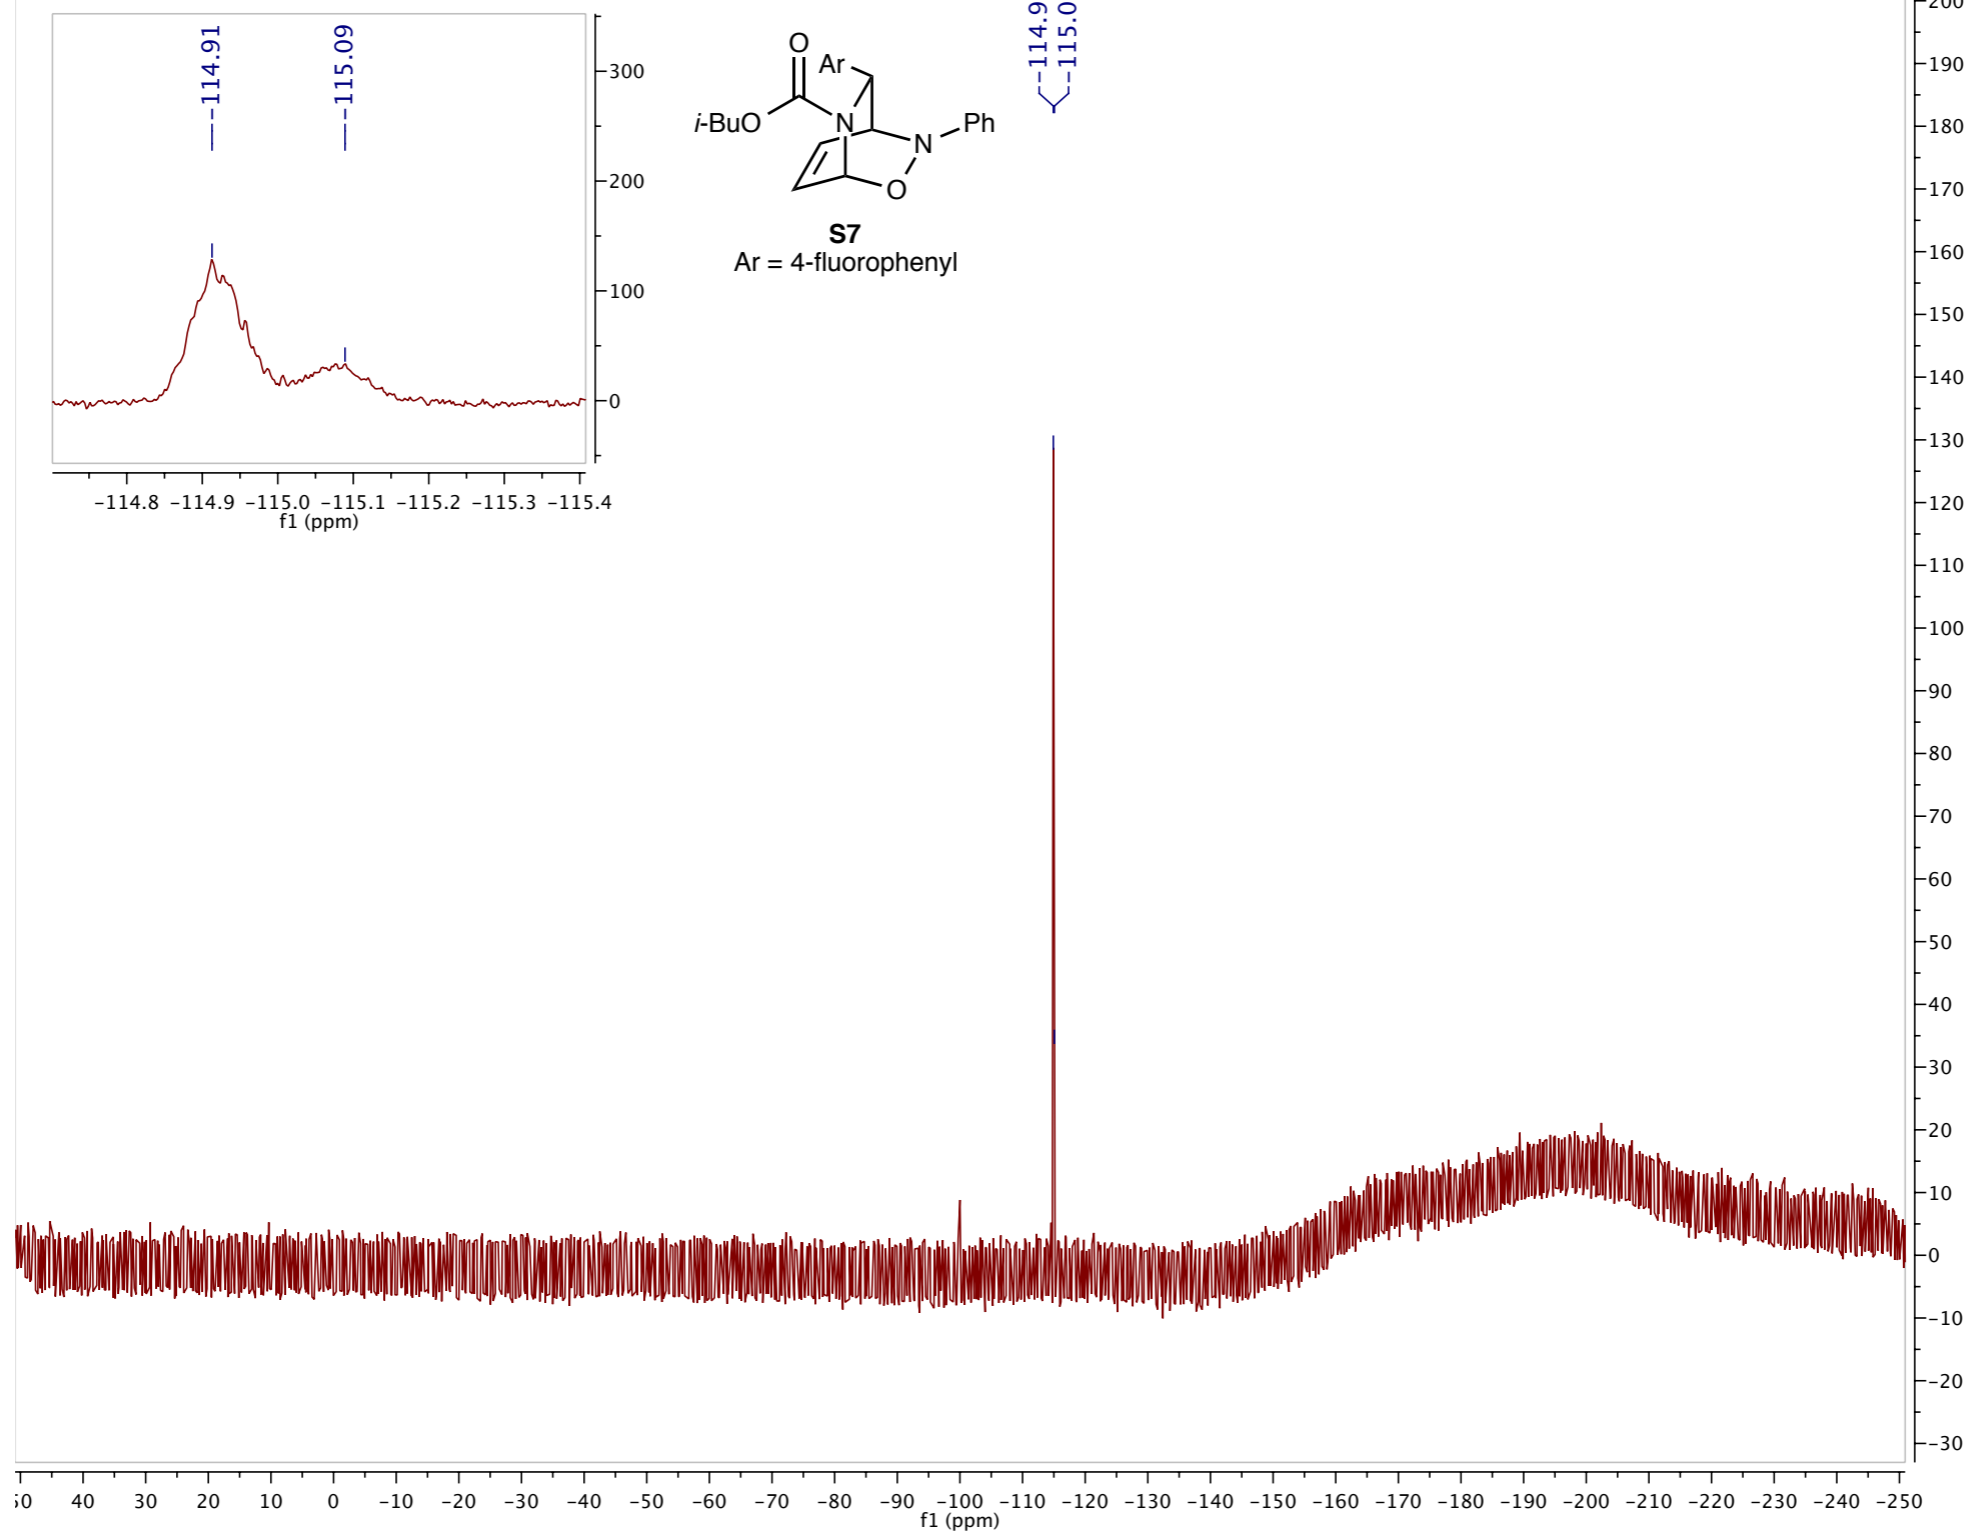

282 MHz  $^{19}\text{F}$ -NMR spectrum of **S7** in  $\text{CDCl}_3$

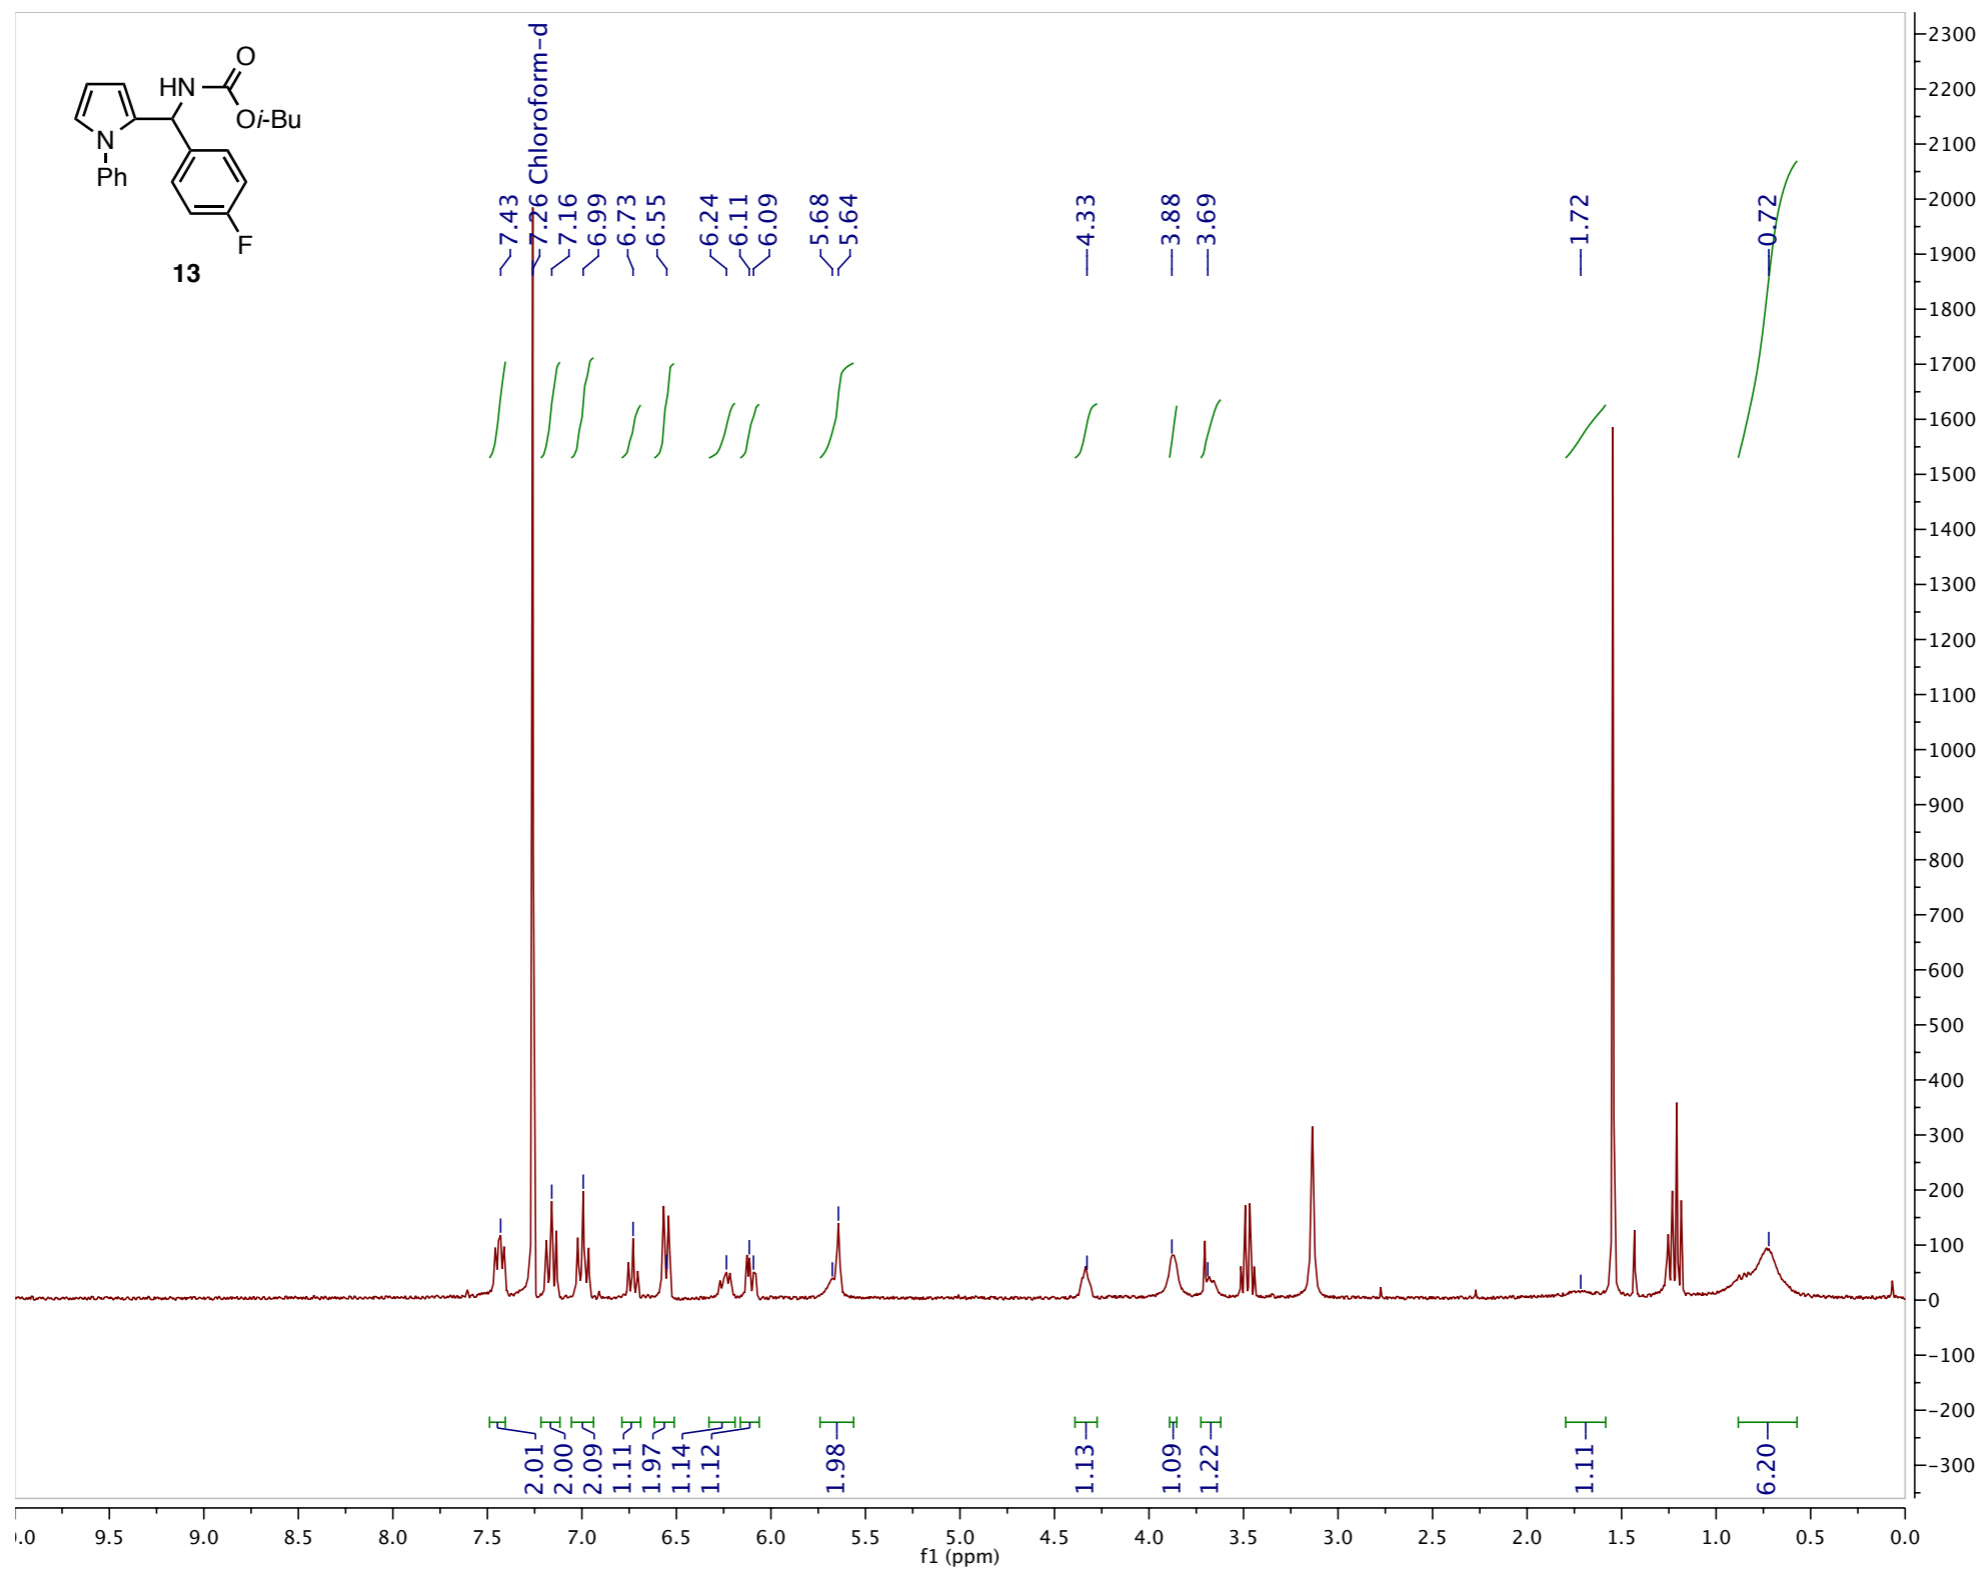

300 MHz <sup>1</sup>H-NMR spectrum of **13** in CDCl<sub>3</sub>



A2\_72-PL-05-272\_carbon.10.fid  
C13CPDp1.PU CDCl3 /opt/topspin3.0 jlutz 72

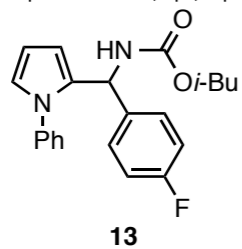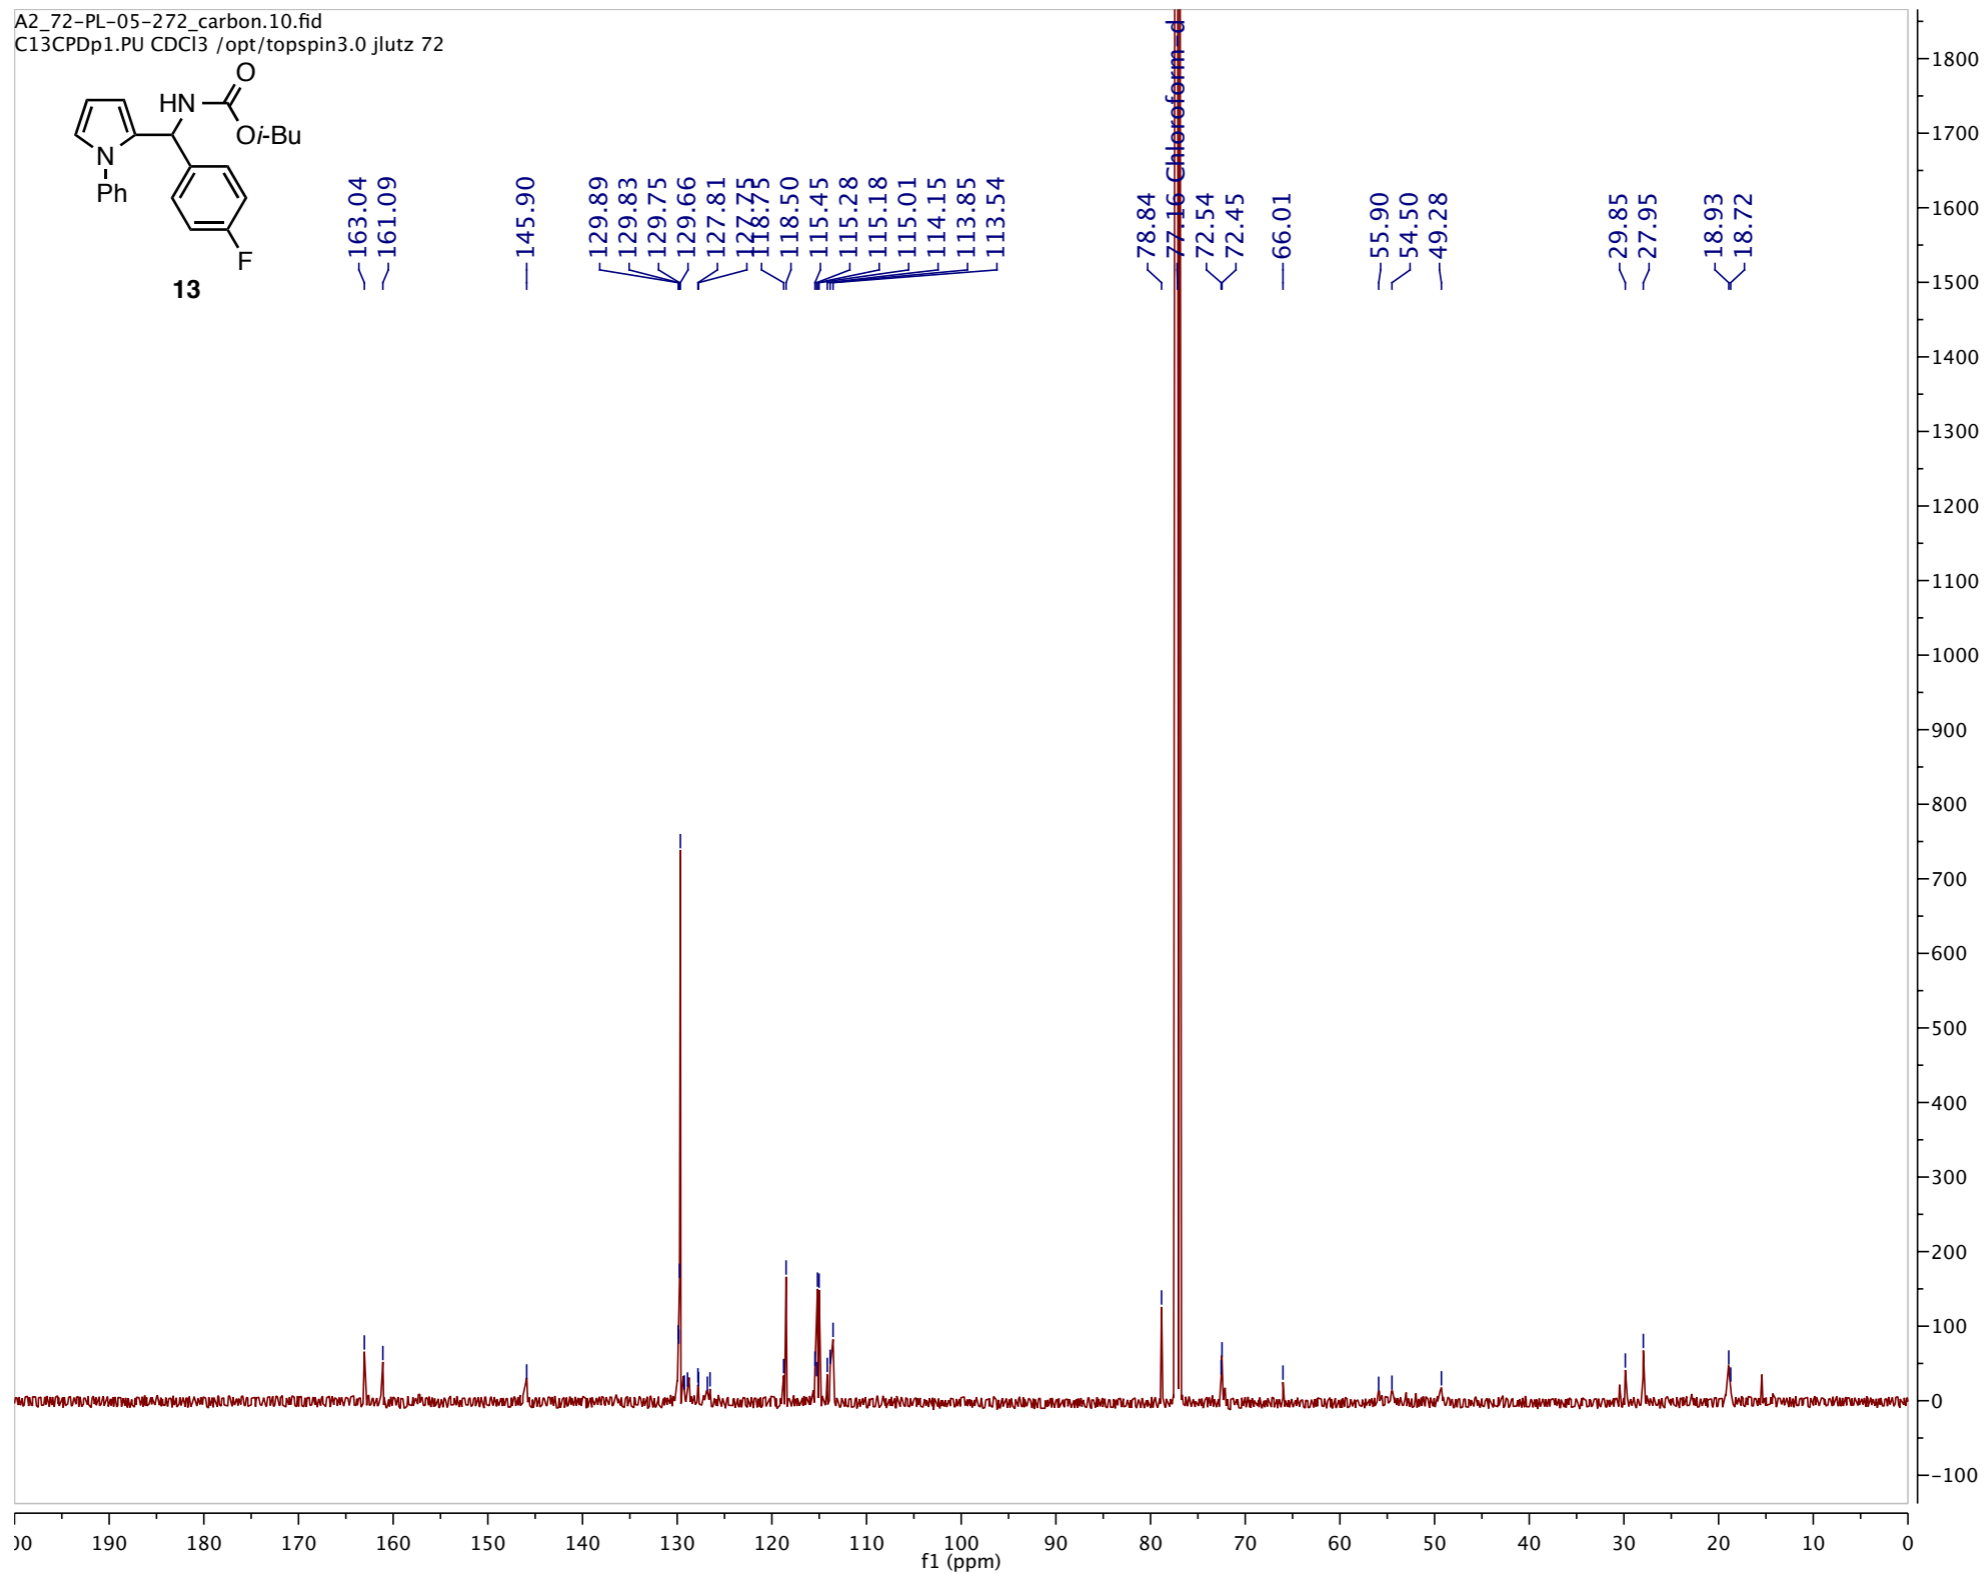

125 MHz  $^{13}\text{C}$ -NMR spectrum of **13** in  $\text{CDCl}_3$

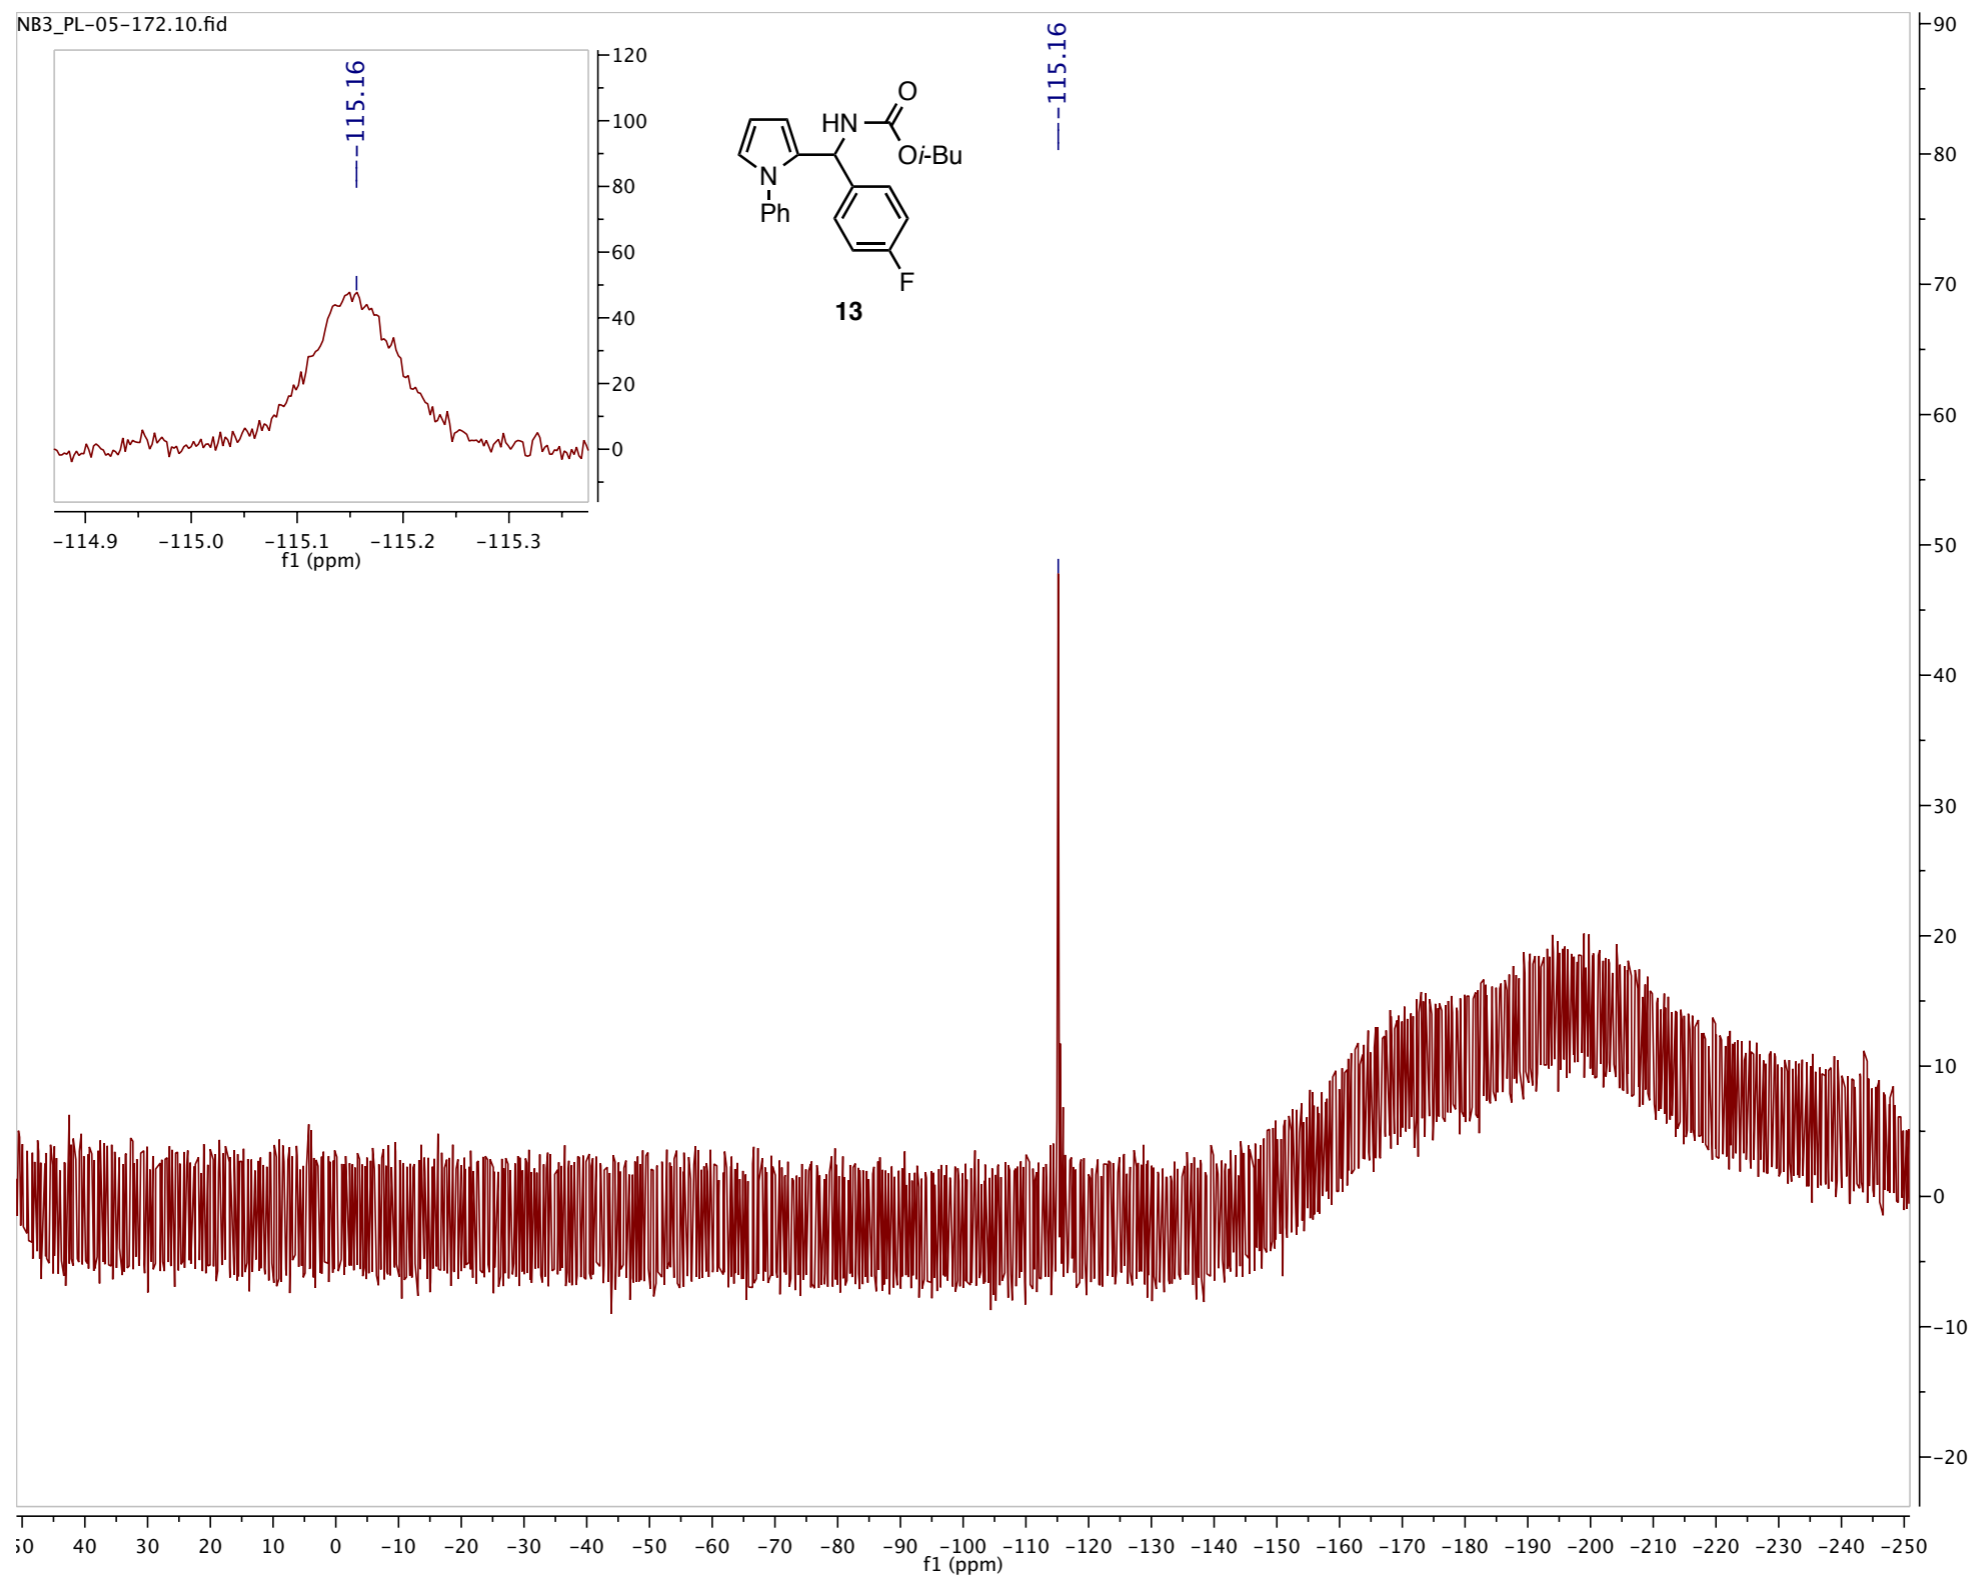

A2\_11-PL-05-271\_hivac\_proton.10.fid  
PROTON.PU CDCl3 /opt/topspin3.0 jlutz 11

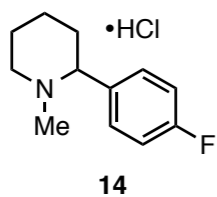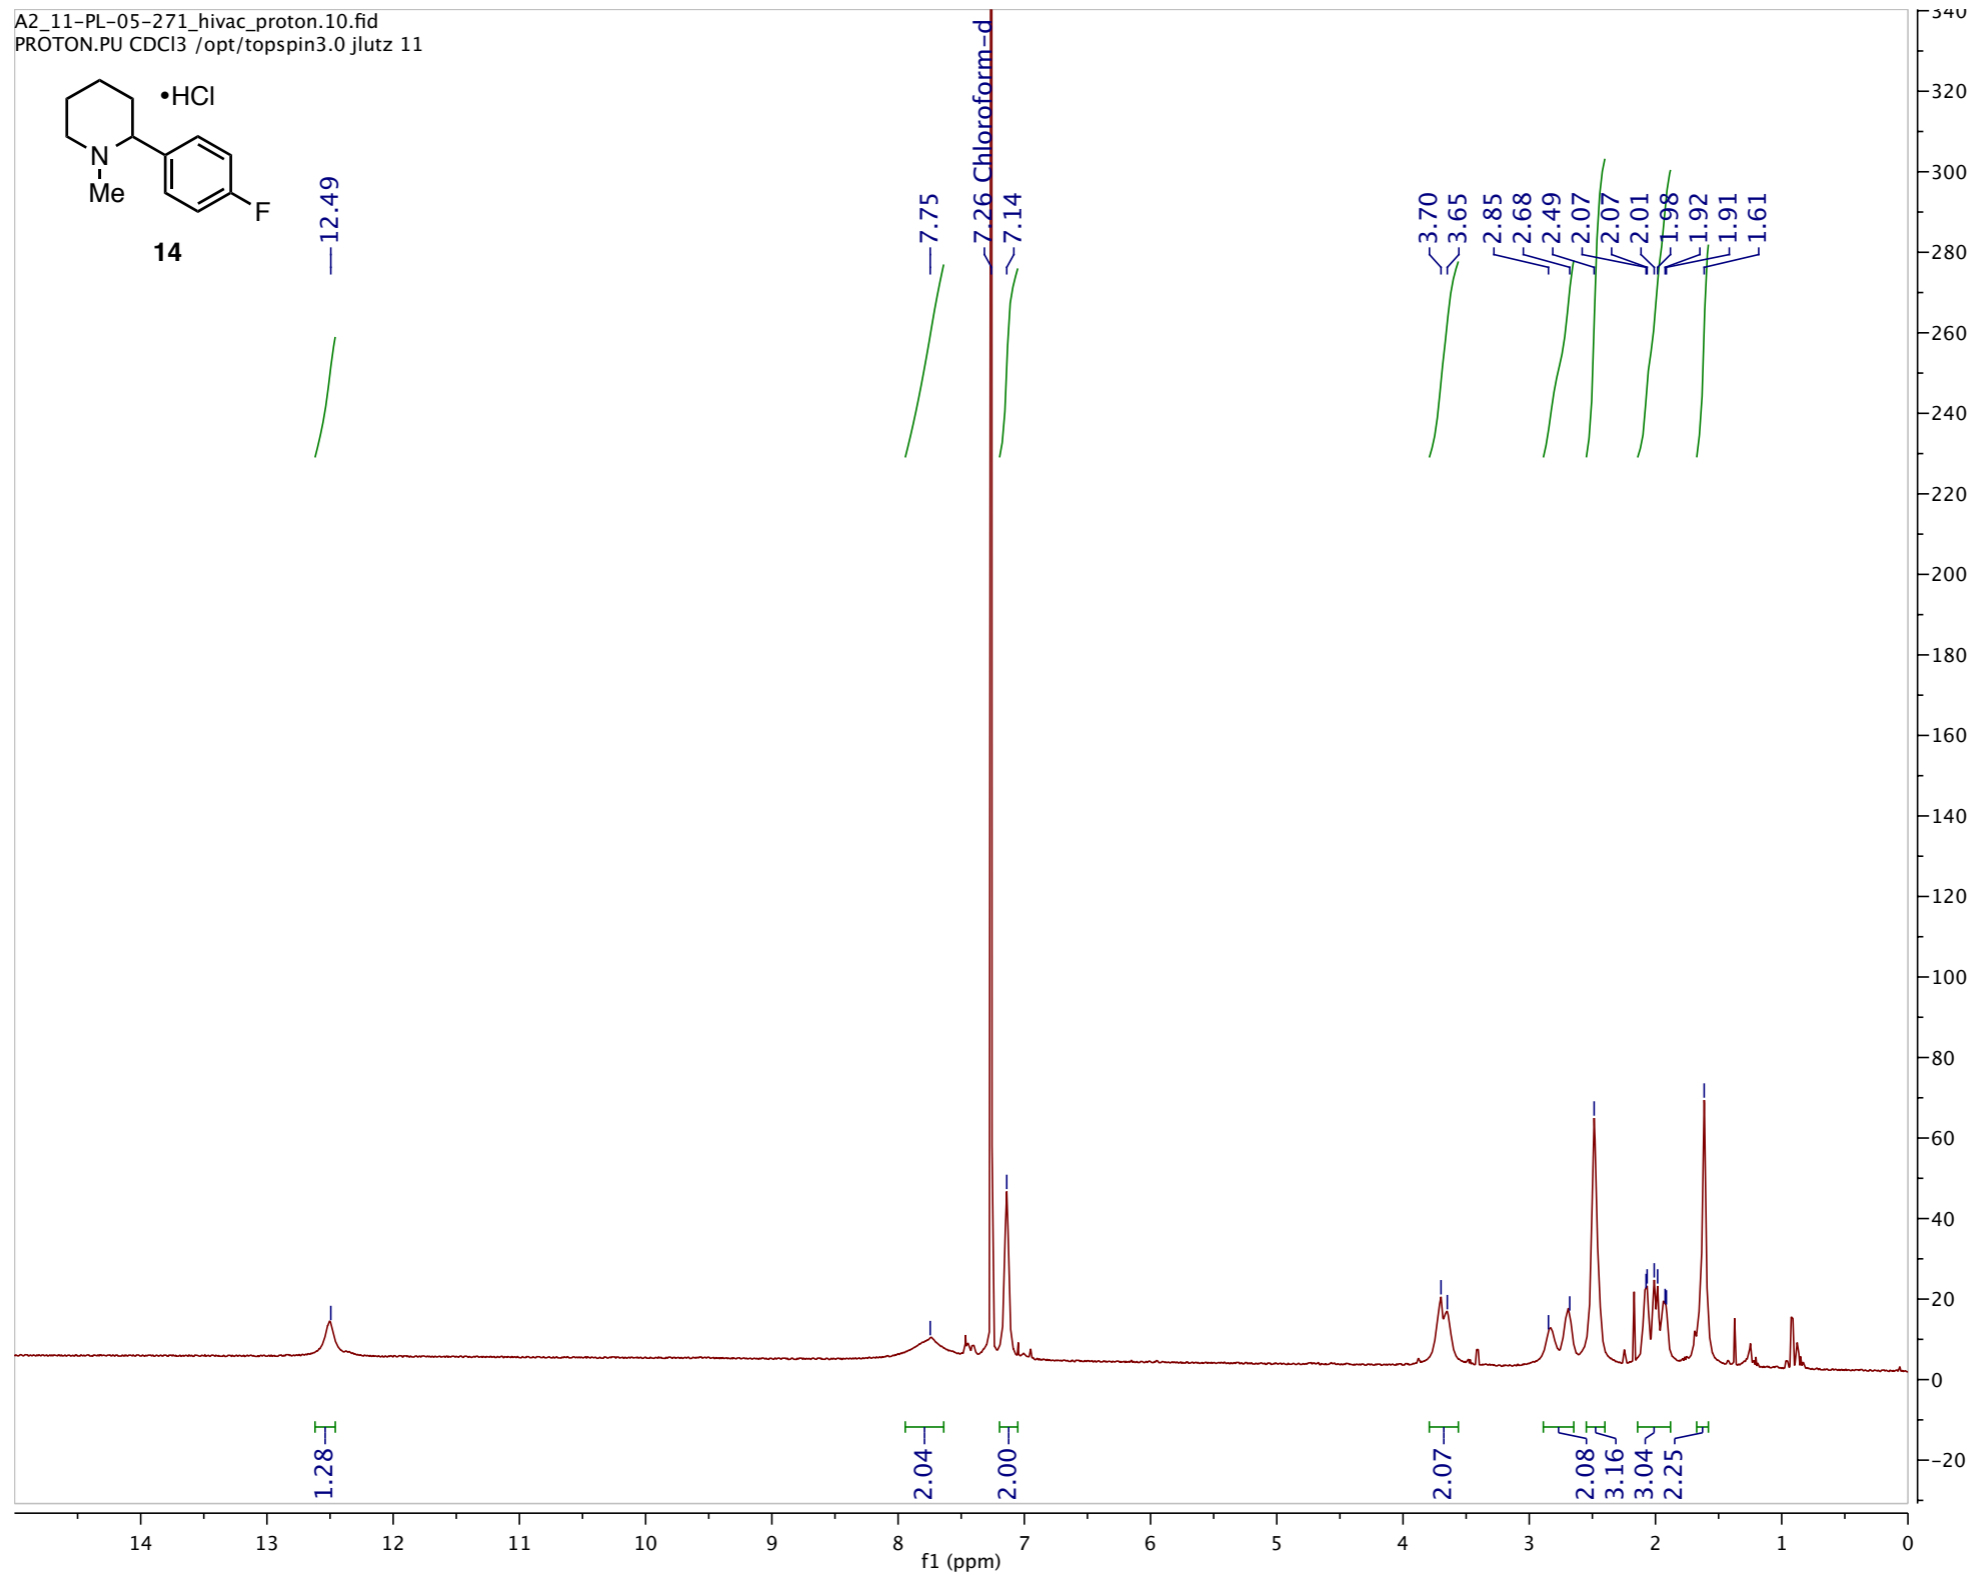

500 MHz <sup>1</sup>H-NMR spectrum of **14** in CDCl<sub>3</sub>

A2\_11-PL-05-271\_hivac\_carbon.20.fid  
C13CPDp1.PU CDCl3 /opt/topspin3.0 jlutz 11

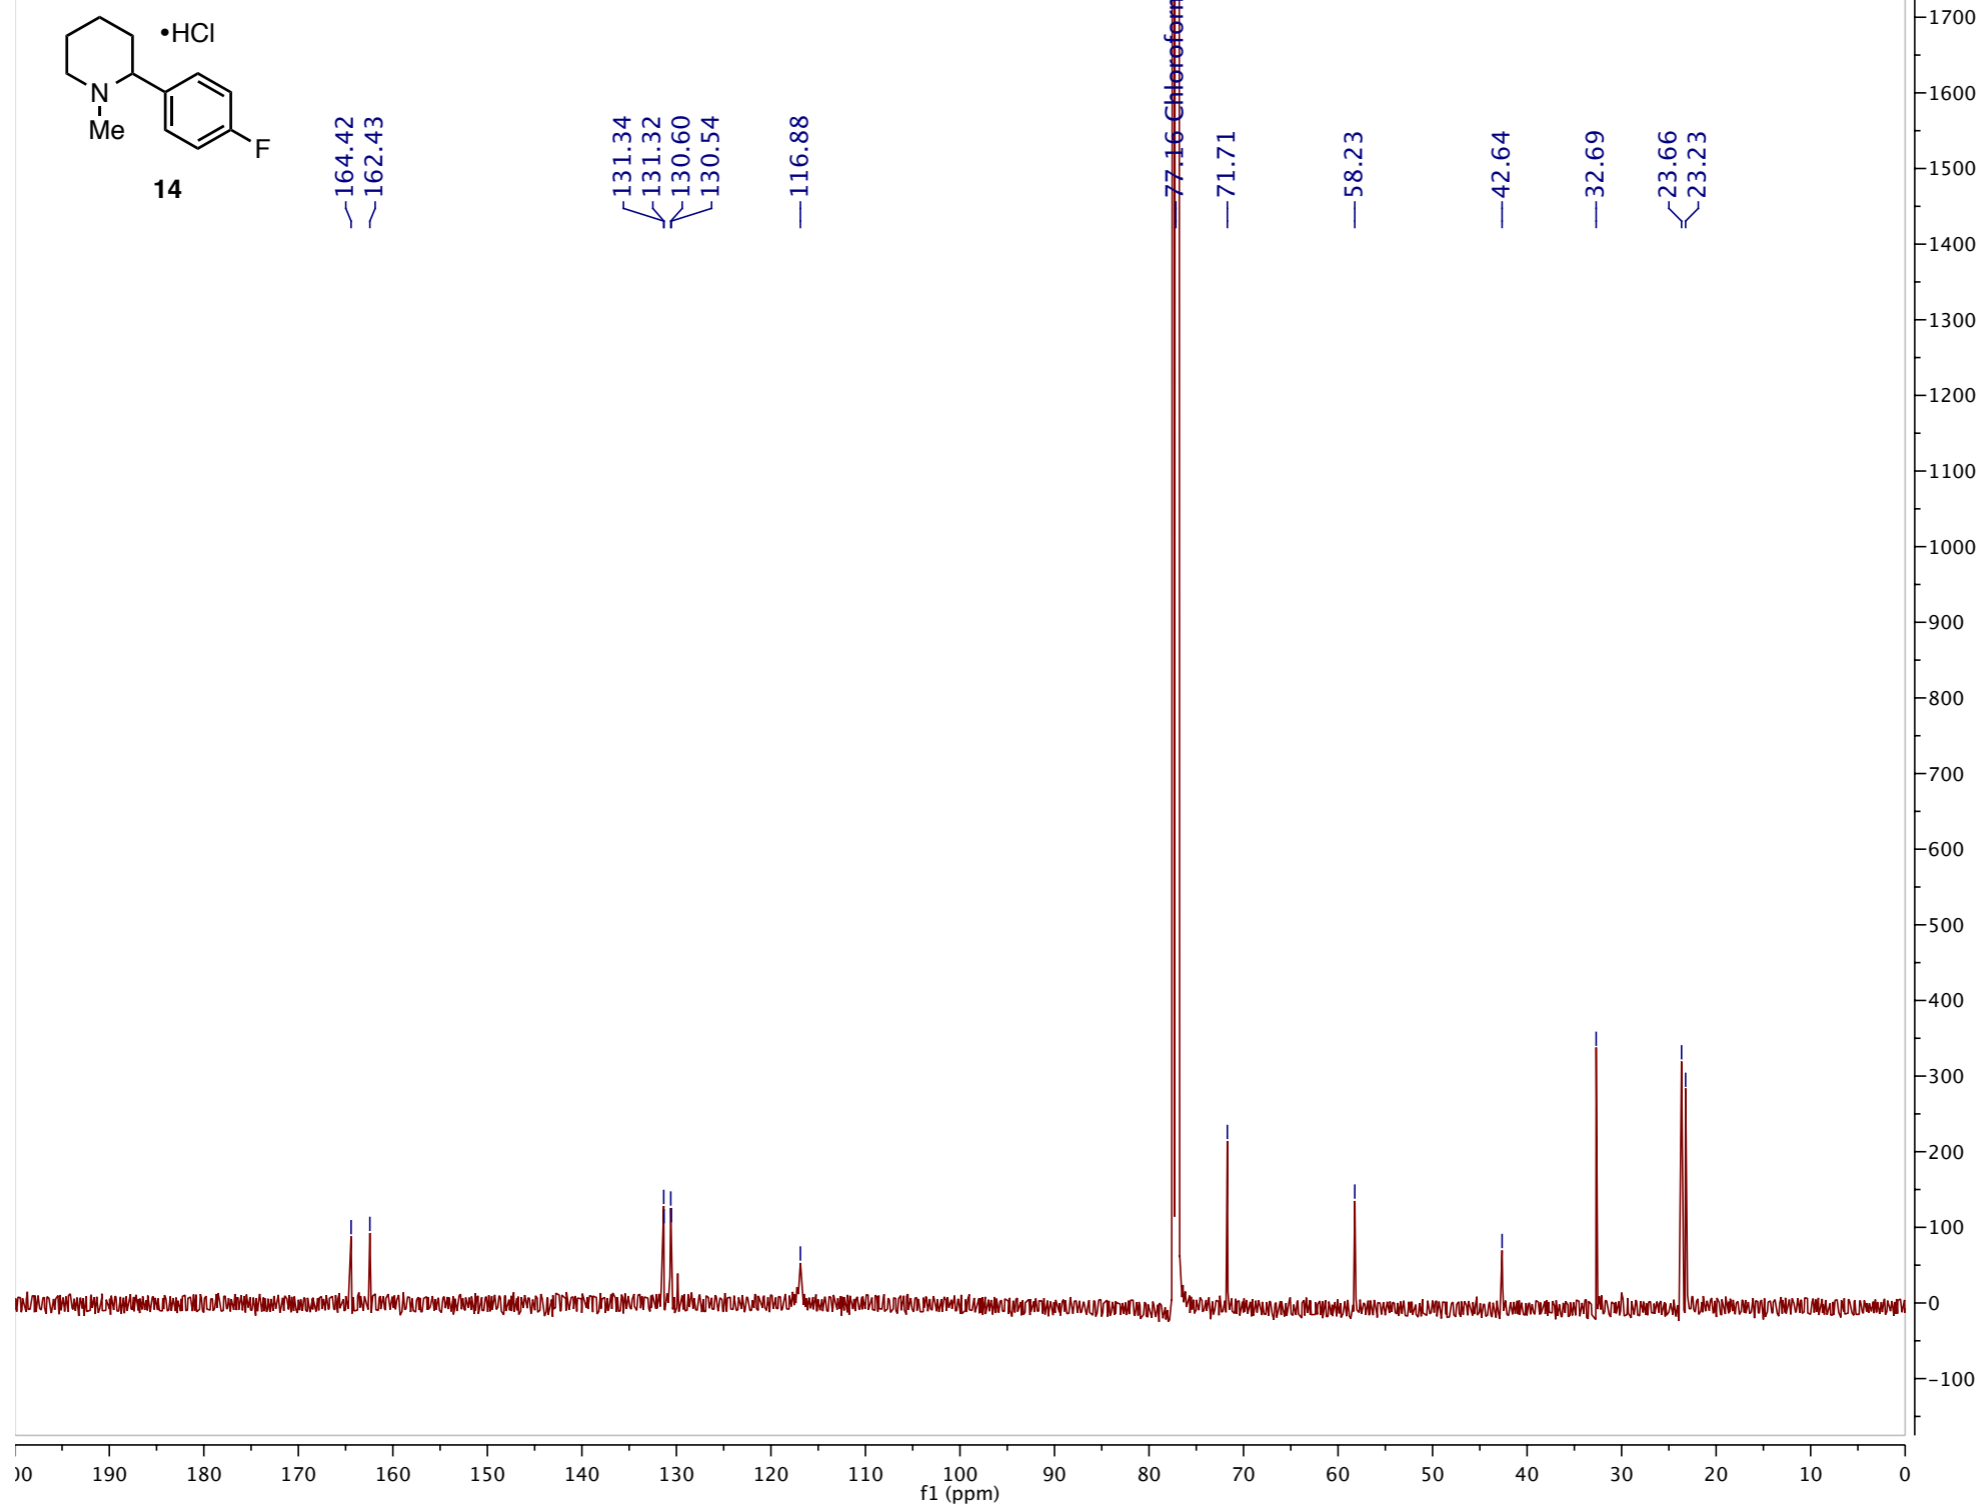

125 MHz  $^{13}\text{C}$ -NMR spectrum of **14** in  $\text{CDCl}_3$

NB3\_PL-05-271\_hivac.10.fid

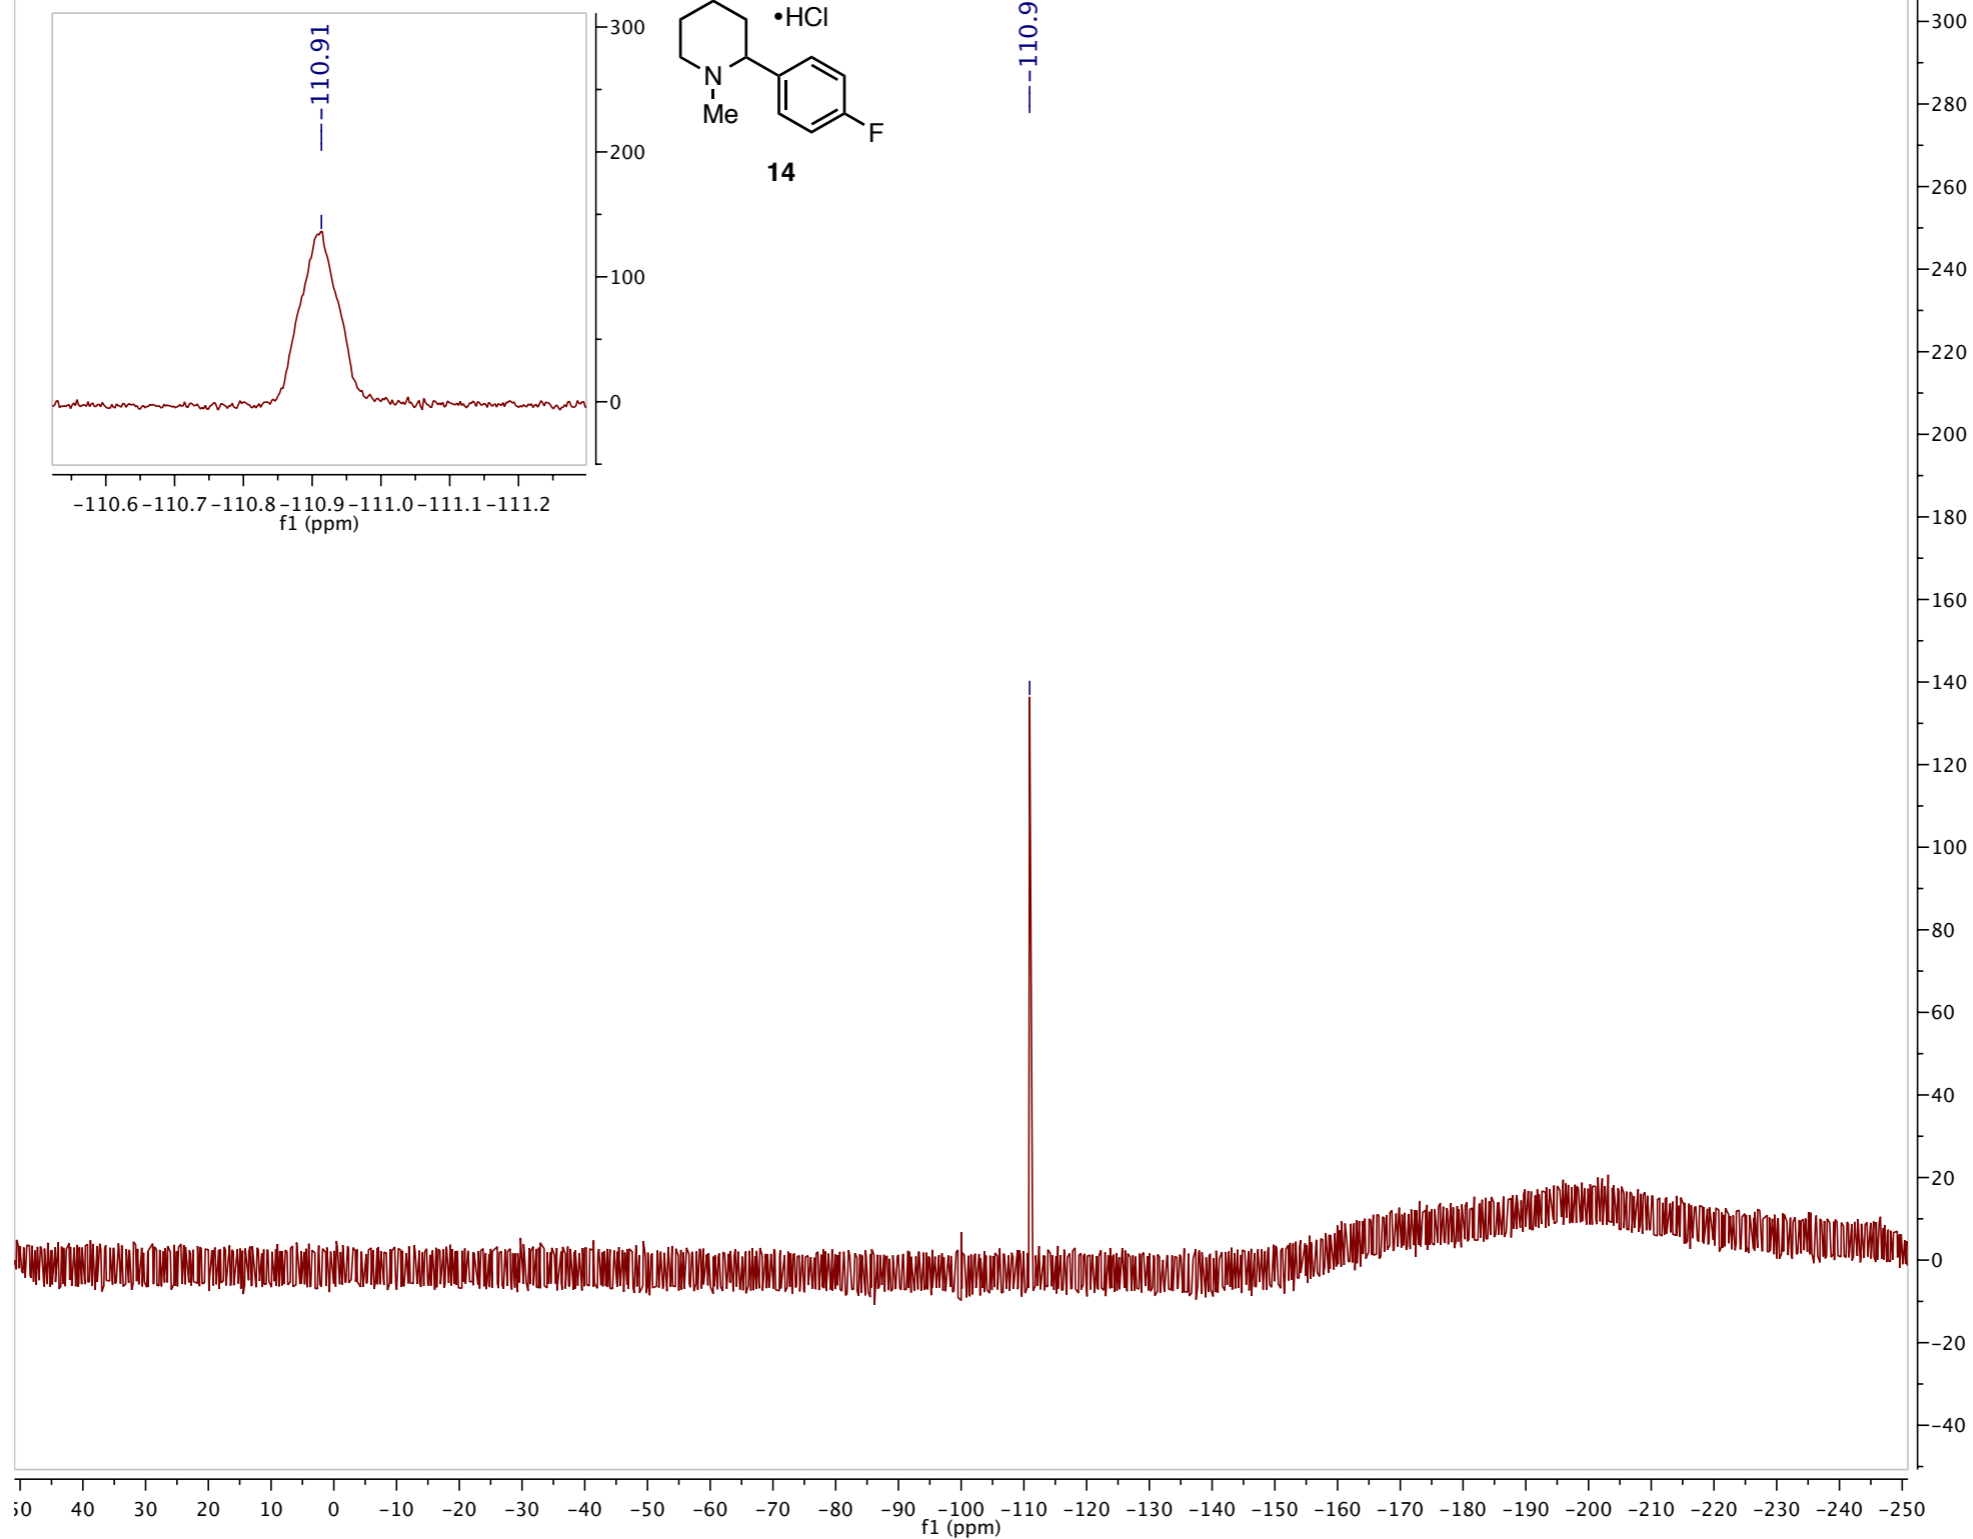

282 MHz  $^{19}\text{F}$ -NMR spectrum of **14** in  $\text{CDCl}_3$

A2\_32-PL-05-254\_proton.10.fid  
PROTON.PU CDCl3 /opt/topspin3.0 jlutz 32

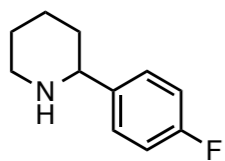

15

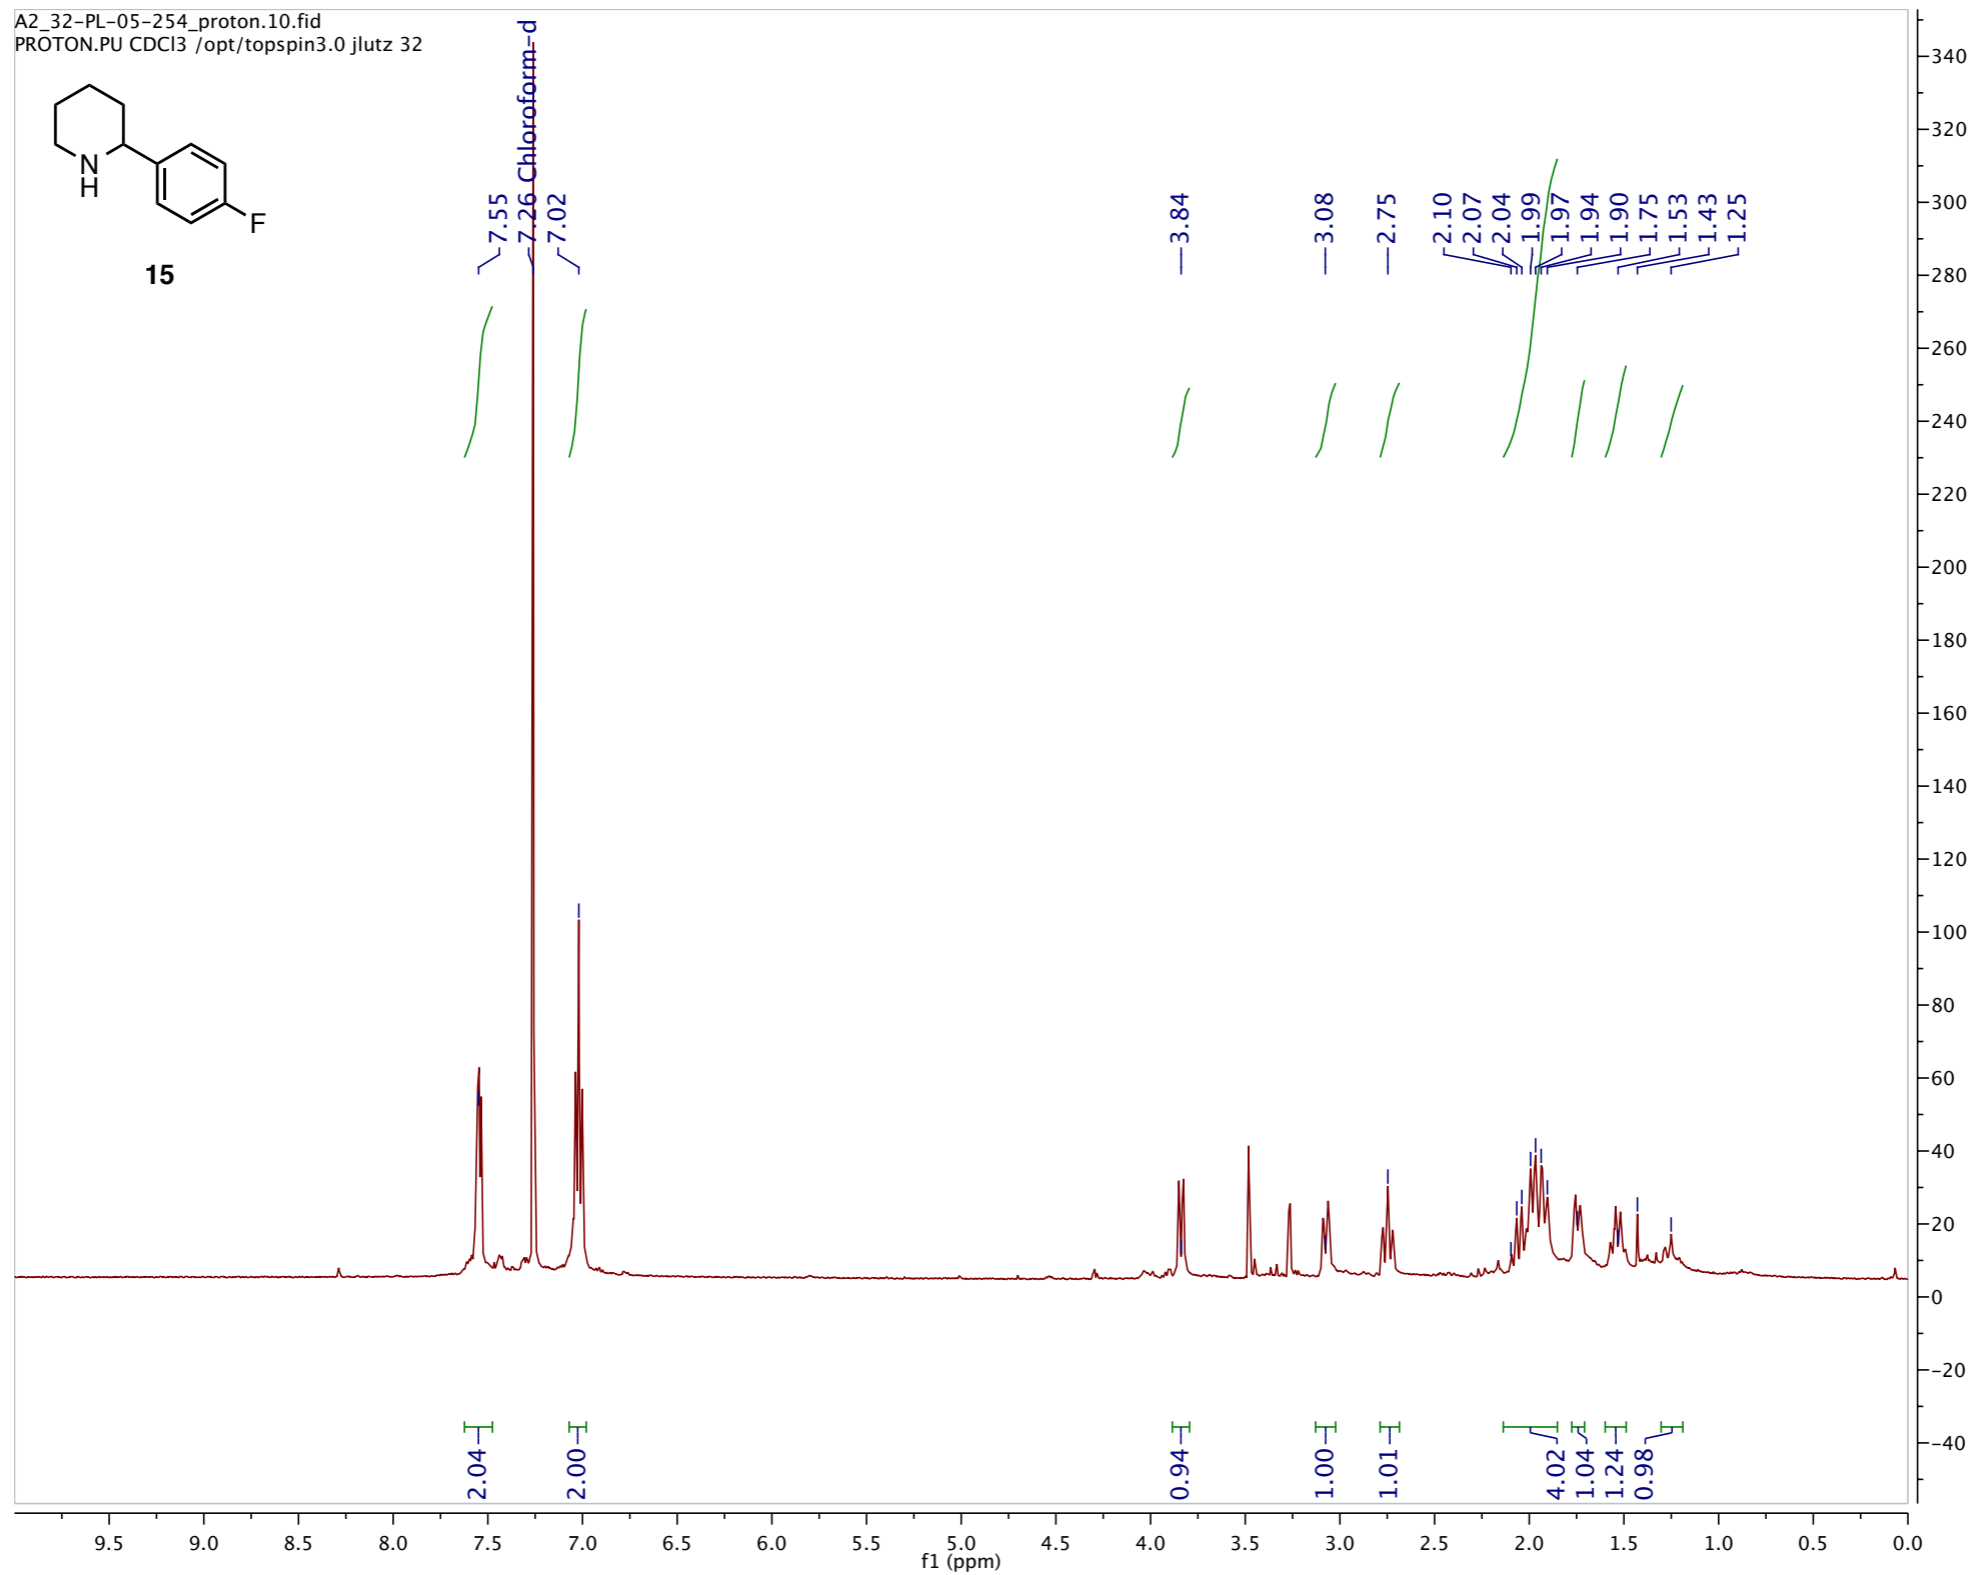

500 MHz  $^1\text{H}$ -NMR spectrum of **15** in  $\text{CDCl}_3$

A2\_32-PL-05-254\_carbon.10.fid  
C13CPDp1.PU CDCl3 /opt/topspin3.0 jlutz 32

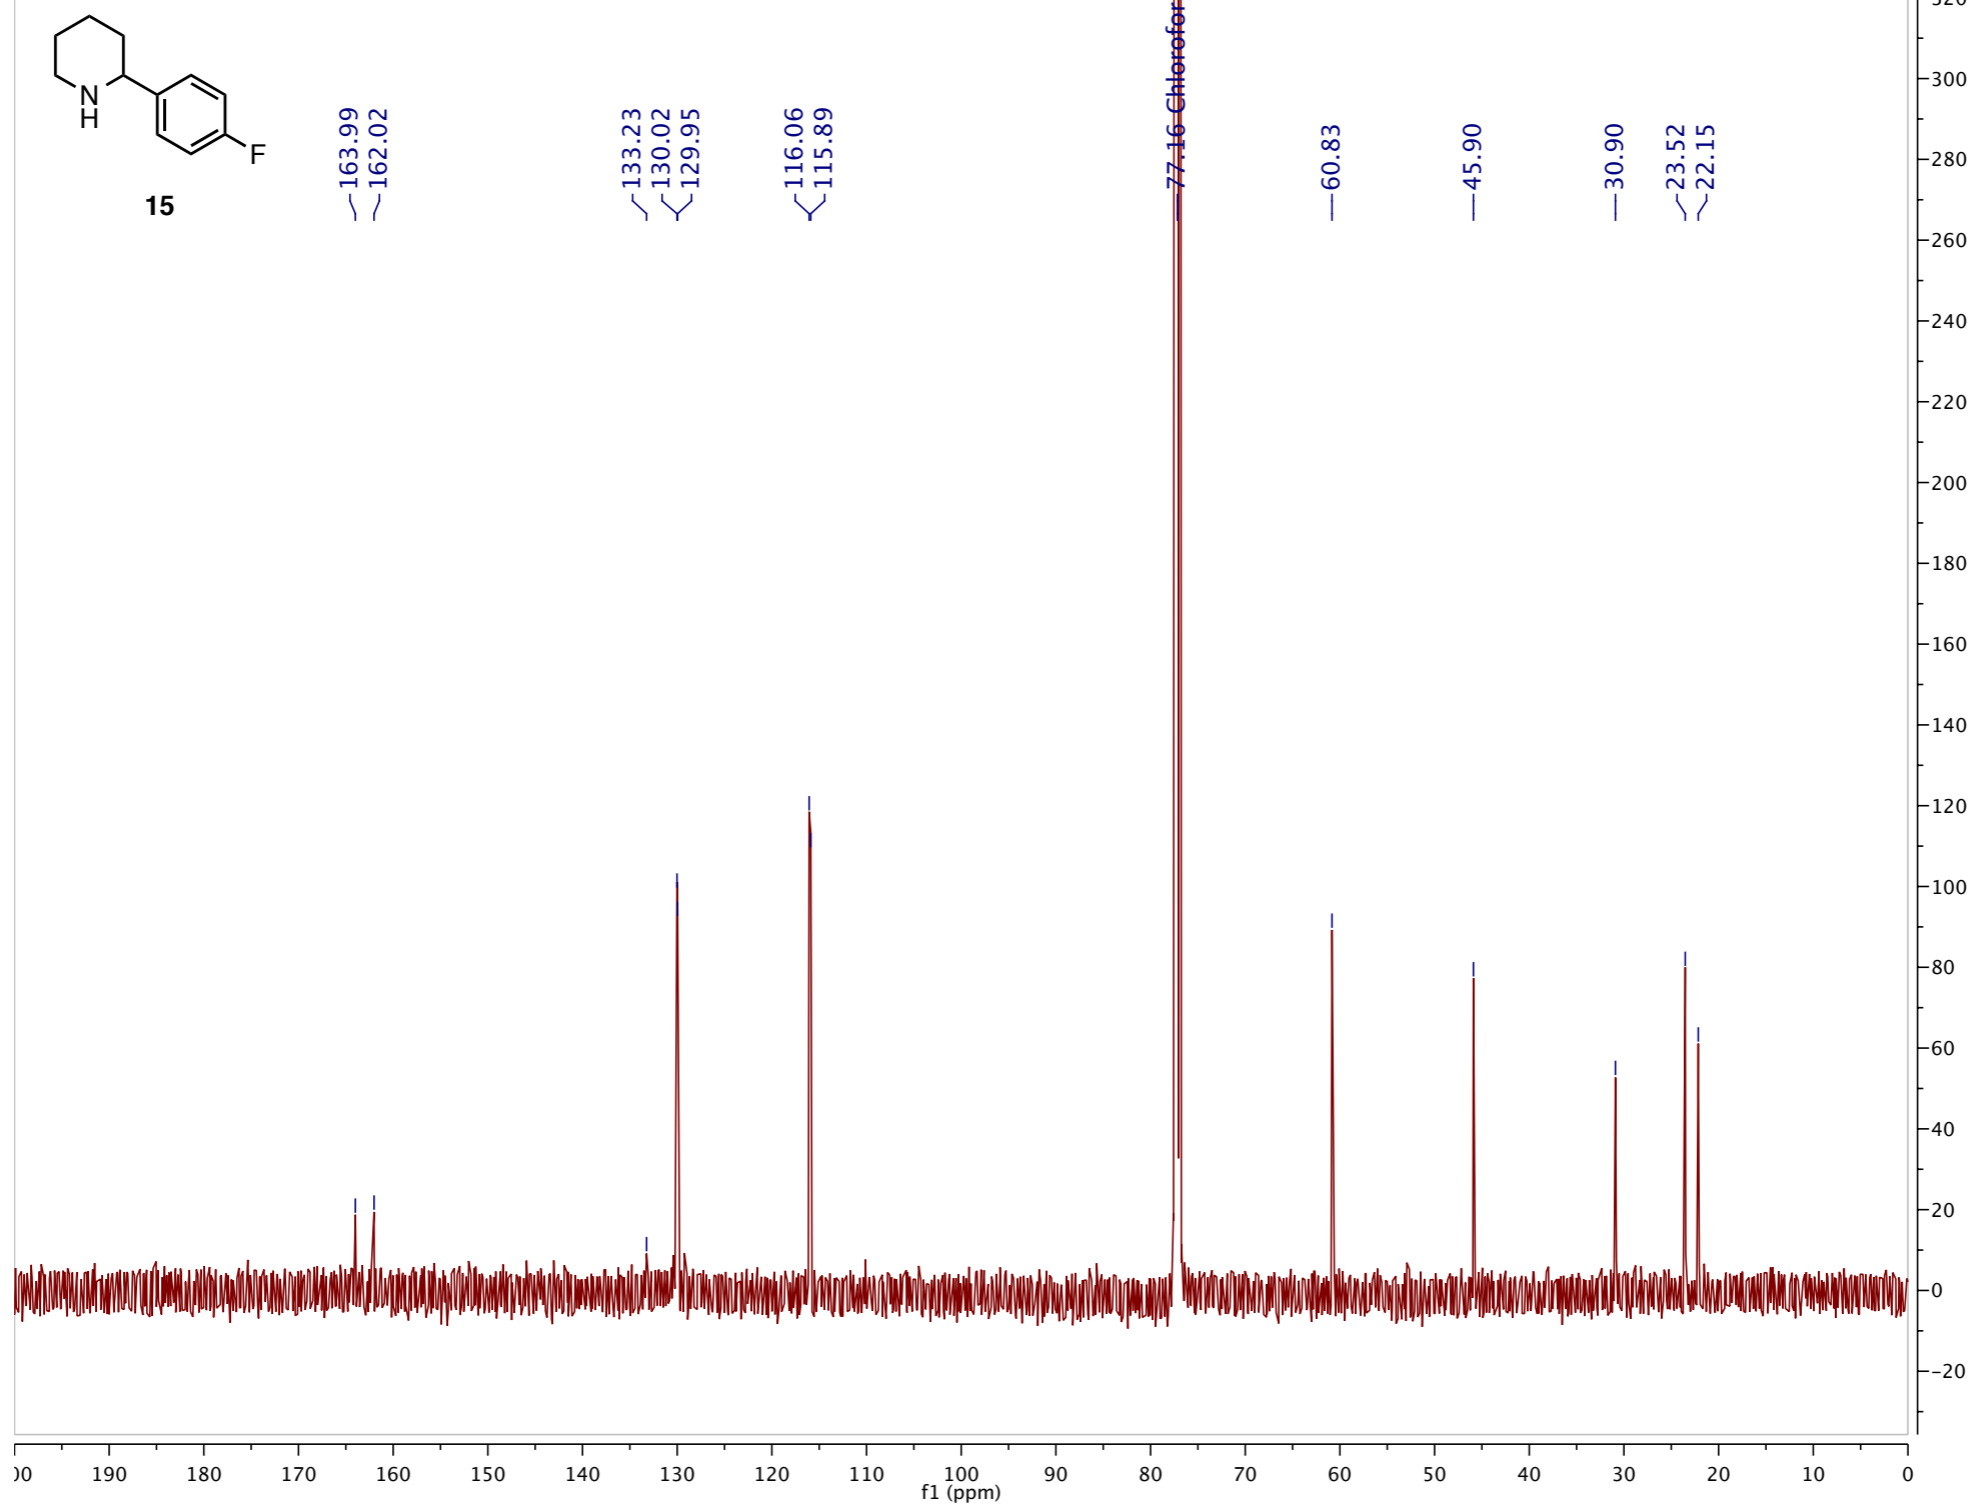

125 MHz <sup>13</sup>C-NMR spectrum of **15** in CDCl<sub>3</sub>

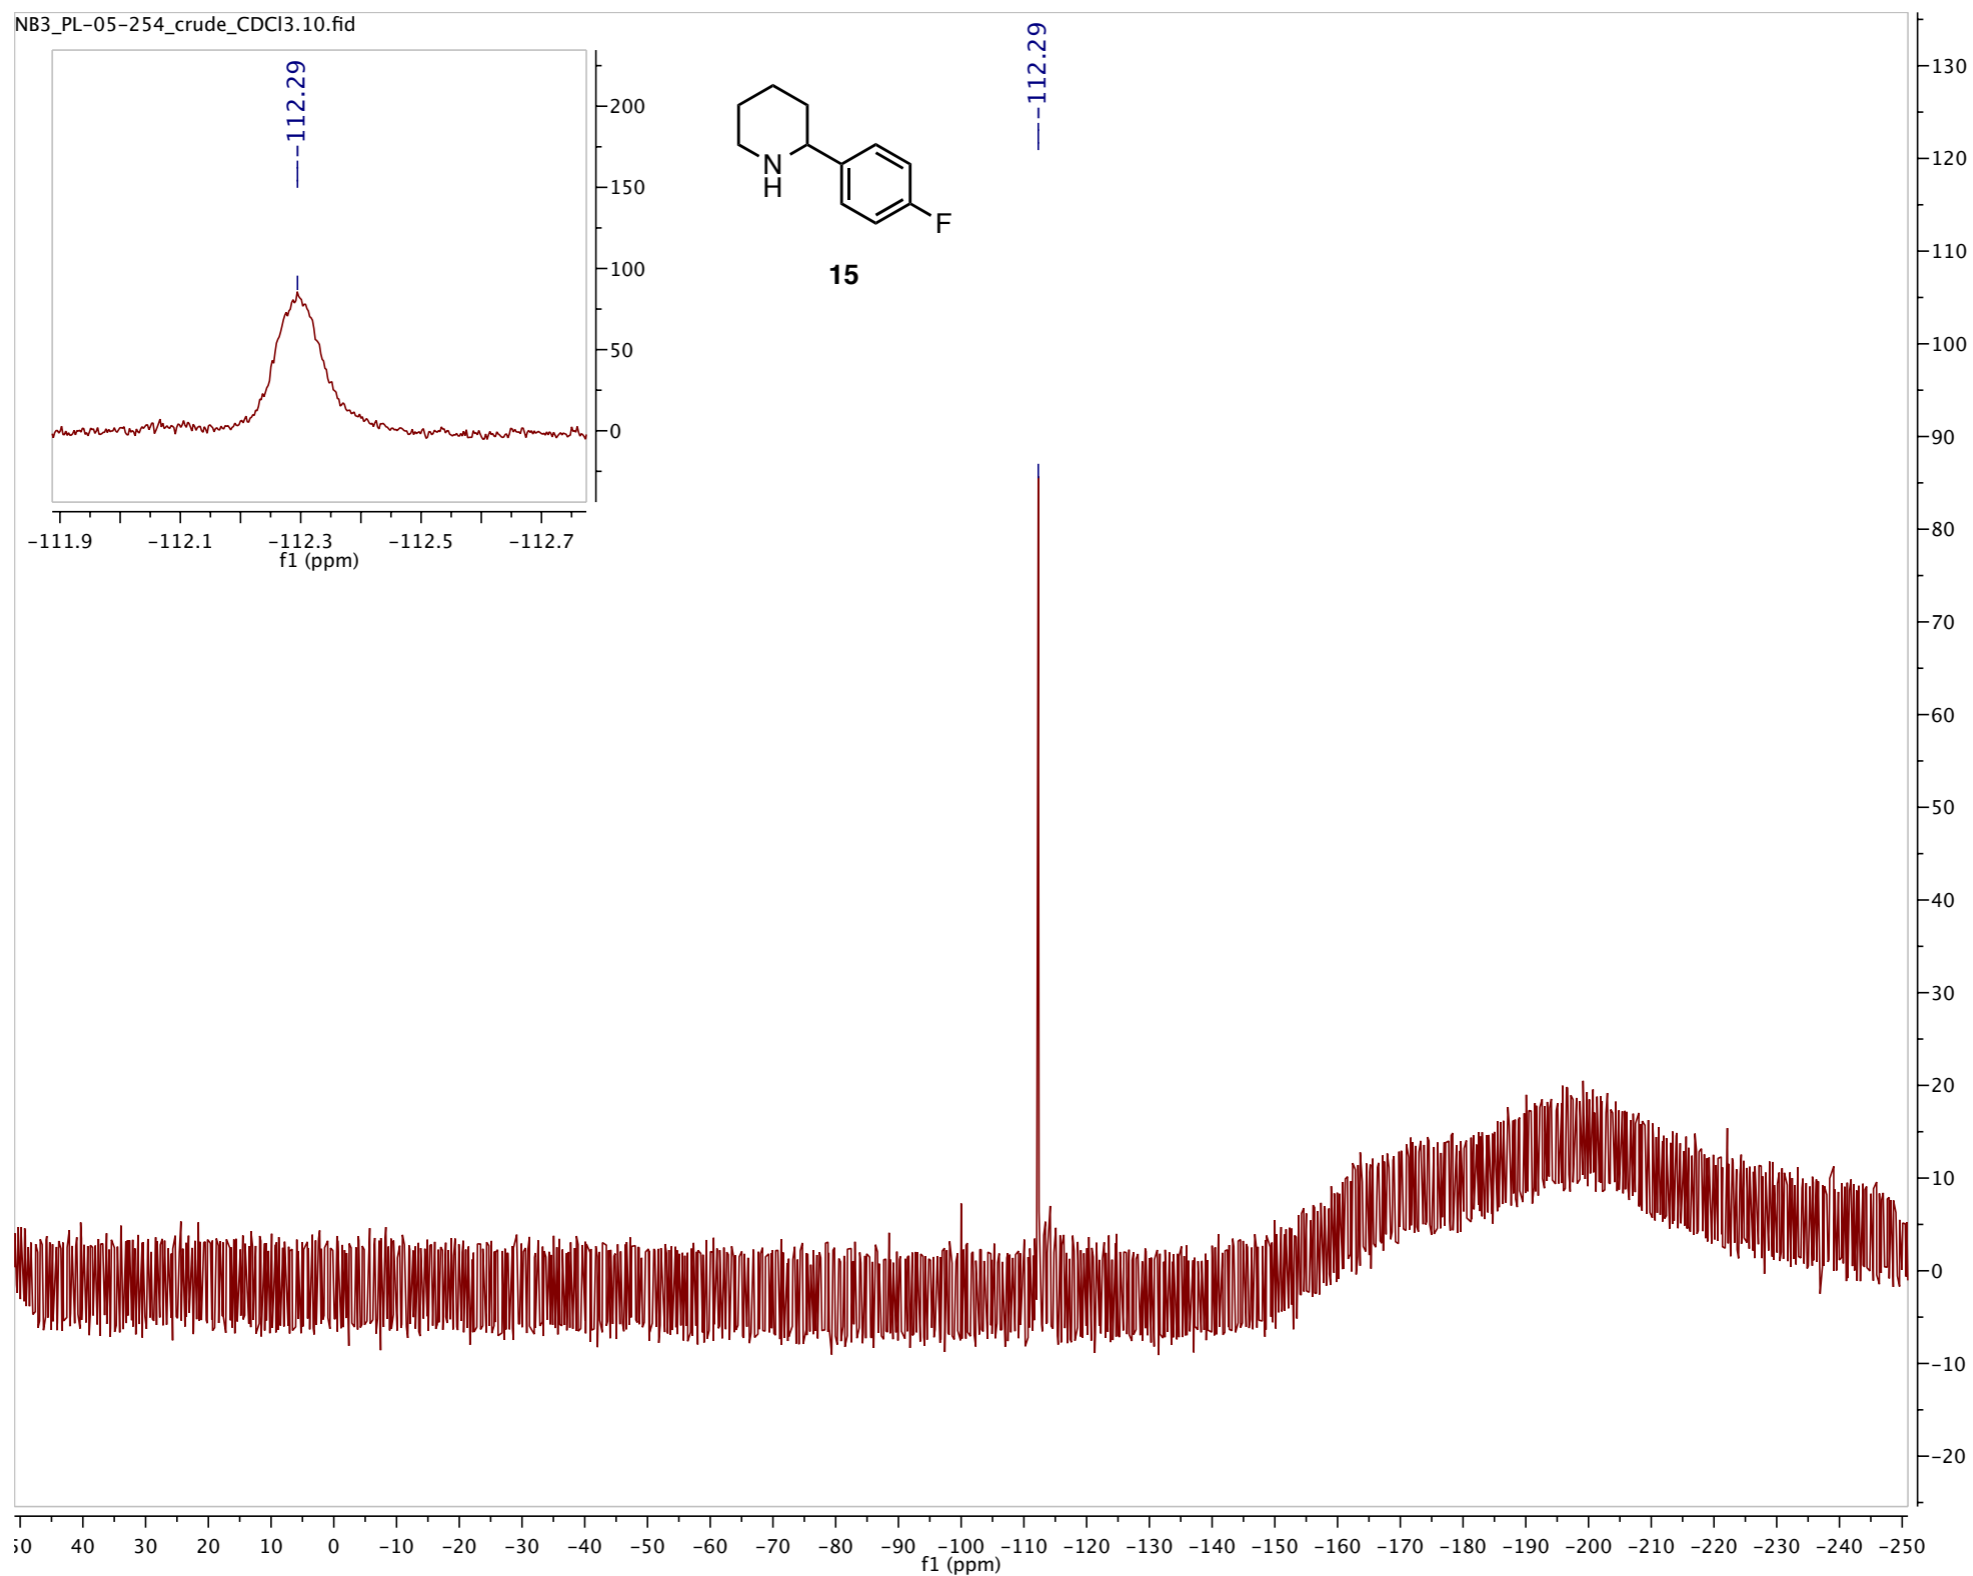

Supplement: SC-007-C6SC00702C-s001.pdf [file SC-007-C6SC00702C-s001.pdf]
